# Supplementary material
Source: bioRxiv or medRxiv preprint supplement (https://www.biorxiv.org/highwire/filestream/15515/field_highwire_adjunct_files/0/056457-1.pdf)

# Supplemental Information

## Structure of complement C3(H<sub>2</sub>O) revealed by quantitative cross-linking/mass spectrometry and modelling

Zhuo A. Chen, Riccardo Pellarin, Lutz Fischer, Andrej Sali, Michael Nilges,  
Paul N. Barlow\*, Juri Rappsilber\*

- Page 2-3     Supplemental Figure S1. Domain arrangements of C3 and C3b in the crystal structures.
- Page 4-5     Supplemental Figure S2. Assessment of cross-link site assignment.
- Page 6-7     Supplemental Figure S3. Clustering of C3(H<sub>2</sub>O) solutions.
- Page 8-187   Annotated best-matched MS2 spectrum for identified cross-linked peptides

# Supplemental Figure 1

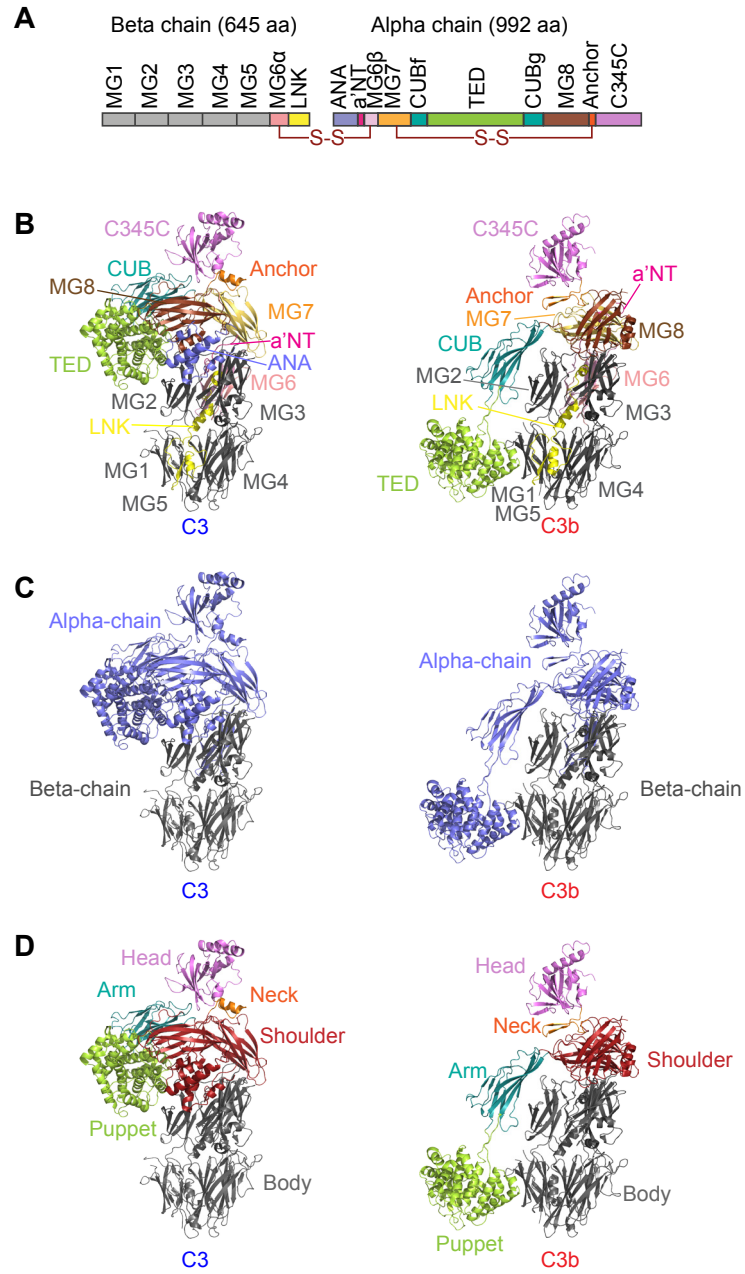

### **Supplemental Figure 1: Domain arrangements of C3 and C3b in the crystal structures**

**(A)** Summary of the multiple domains of C3 (24). **(B)** Domains of C3 and C3b are coloured and labelled in the crystal structures of C3 (PDB|2A73) and C3b (PDB|2I07) (the same PDB entries are used for C and D). **(C)** The  $\alpha$ -chain and the  $\beta$ -chain of C3/C3b are coloured and labelled in the crystal structures of C3 and C3b **(D)** The crystal structures of C3 and C3b are coloured and labelled according to the metaphor of a puppeteer (1).

1. Janssen, B. J., Christodoulidou, A., McCarthy, A., Lambris, J. D., and Gros, P. (2006) Structure of C3b reveals conformational changes that underlie complement activity. *Nature* 444, 213-216

Supplemental Figure S2

A

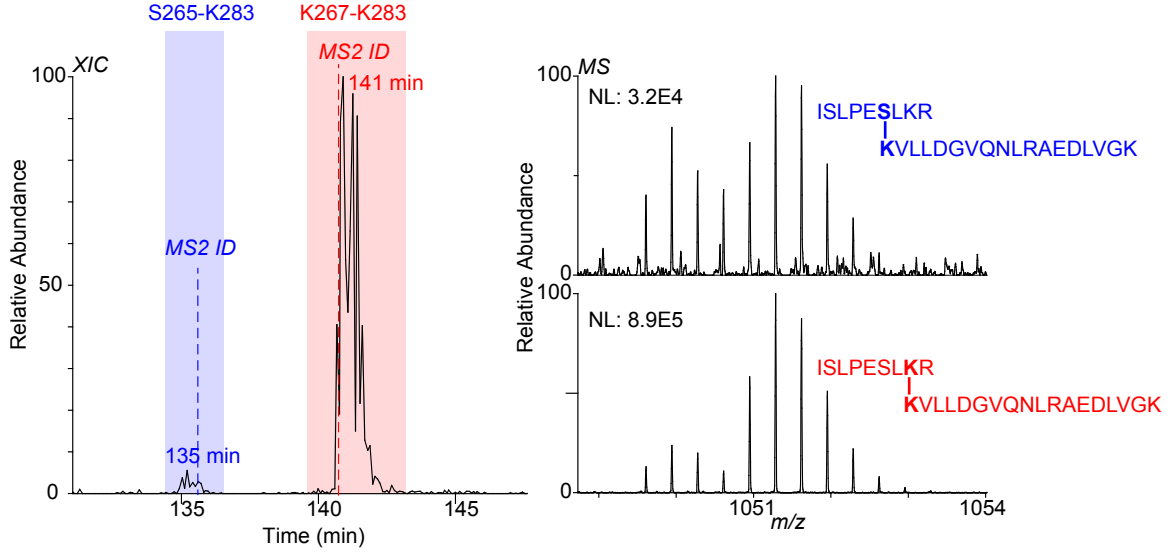

B

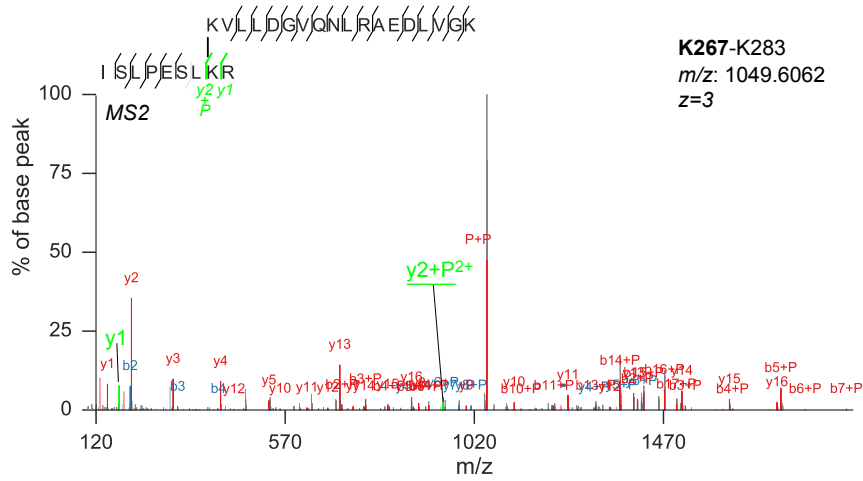

C

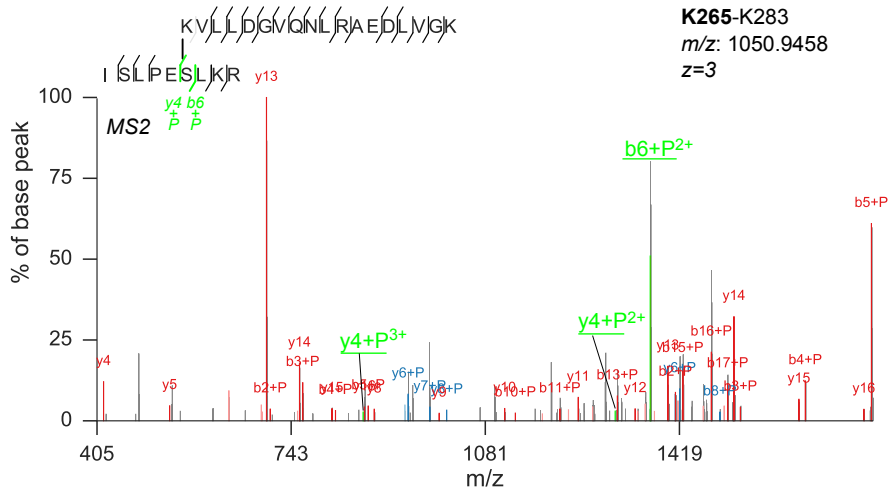

## Supplemental Fig S2. Assessment of cross-link site assignment

Assessment of site assignment of cross-linked peptides is demonstrated using an example.

(A) The peptides ISLPESLKR and KVLLDGVQNLRAEDLVGK were found cross-linked in two ways, once linking 267K and 283K and once linking 265S and 283K. The 267K – 283K linked peptide eluted with a retention time of 141 minute from our HPLC system and was assigned this linkage based on back-bone fragments y1 and y2+P ions that flank 267K (annotated spectrum shown in (B)). 265S – 283K is placed in close sequence proximity to 267K – 283K. Given the much higher reactivity of NHS-esters to K when compared to S, special caution needed to be employed when calling 265S – 283K. 265S is supported over 267K in the matching fragmentation spectrum by the observation of b6+P and y4+P ions that flank 265S (annotated spectrum shown in (C)). In addition, the 265S – 283K peptide eluted at 135 minute in a baseline separated peak from our HPLC system. Notably, the intensity of this peptide is much lower than that carrying the 267K – 283K link as one might expect considering the reactivity difference of S and K.

# Supplemental Figure S3

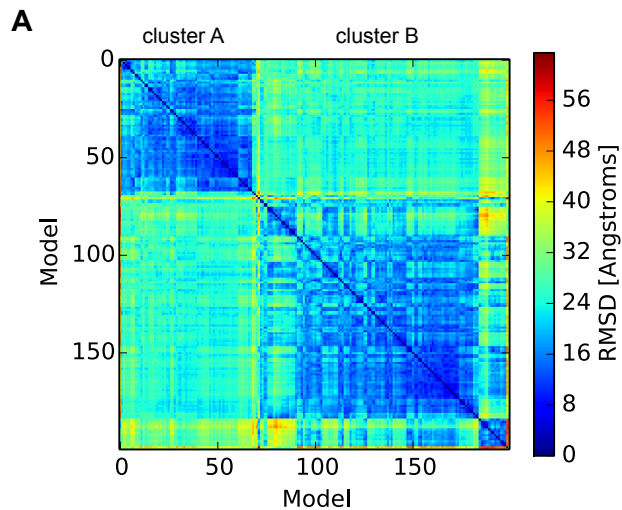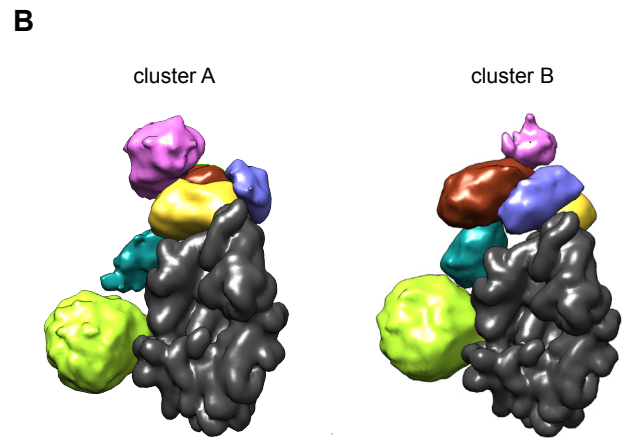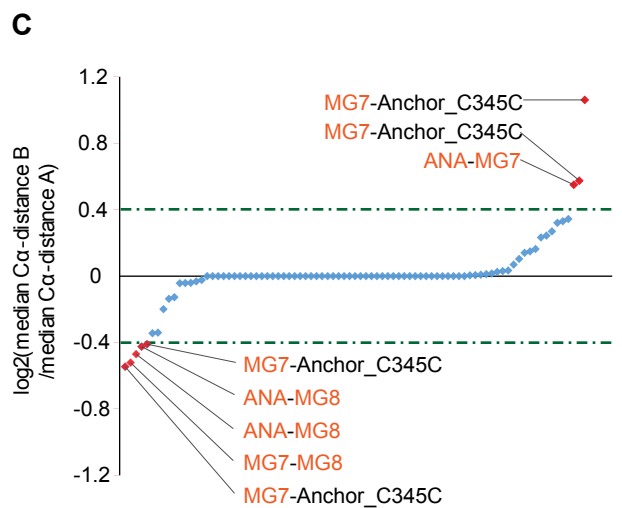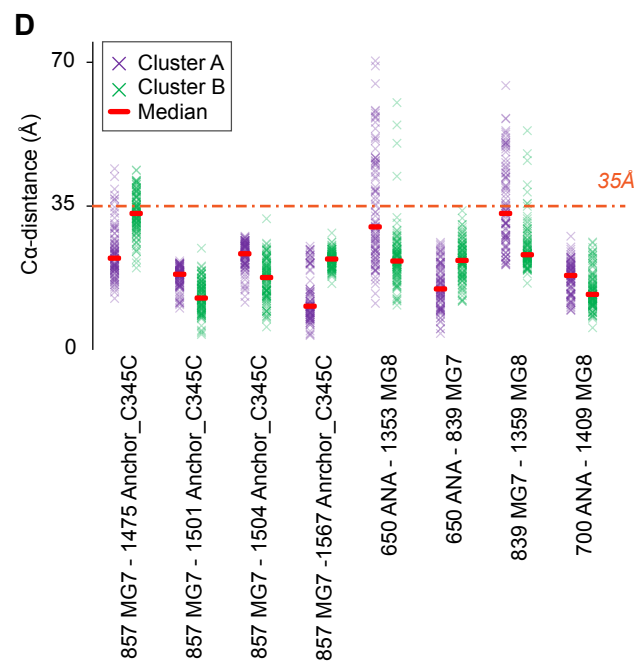

### Supplementary Figure 3. Clustering of C3(H<sub>2</sub>O) solutions.

The 200 best scoring models (solutions) were partitioned into clusters, using the k-means clustering method. The two blue blocks of the pair-wise r.m.s.-distance matrix calculated between the 200 models (**A**) suggested the presence of at least two main clusters of similar structures. The resulting clusters (**B**) displayed a different orientation of MG8 (brown density) and ANA (violet density), with respect to the other domains. A comparison of the distances between cross-linked residues, in cluster A *versus* cluster B, is shown in (**C**). For each cross-link (displayed along the *x*-axis) the ratio (for cluster A *versus* cluster B) of median C $\alpha$ -C $\alpha$  distances is shown in the *y*-axis (log scale). Distances that differ most between the two clusters (red) all involve domains at the “shoulder” region of the molecule (ANA, MG7 and MG8). (**D**) For those cross-linked pairs of residues for which mean C $\alpha$ -C $\alpha$  distances differed between clusters A and B (highlighted in red in (**C**)), the C $\alpha$ -C $\alpha$  distance for every solution (shown as crosses, purple for cluster A and green for cluster B) are plotted. The median of the distribution is represented by a red line. Cluster B show better satisfaction on residue proximities defined by cross-links.

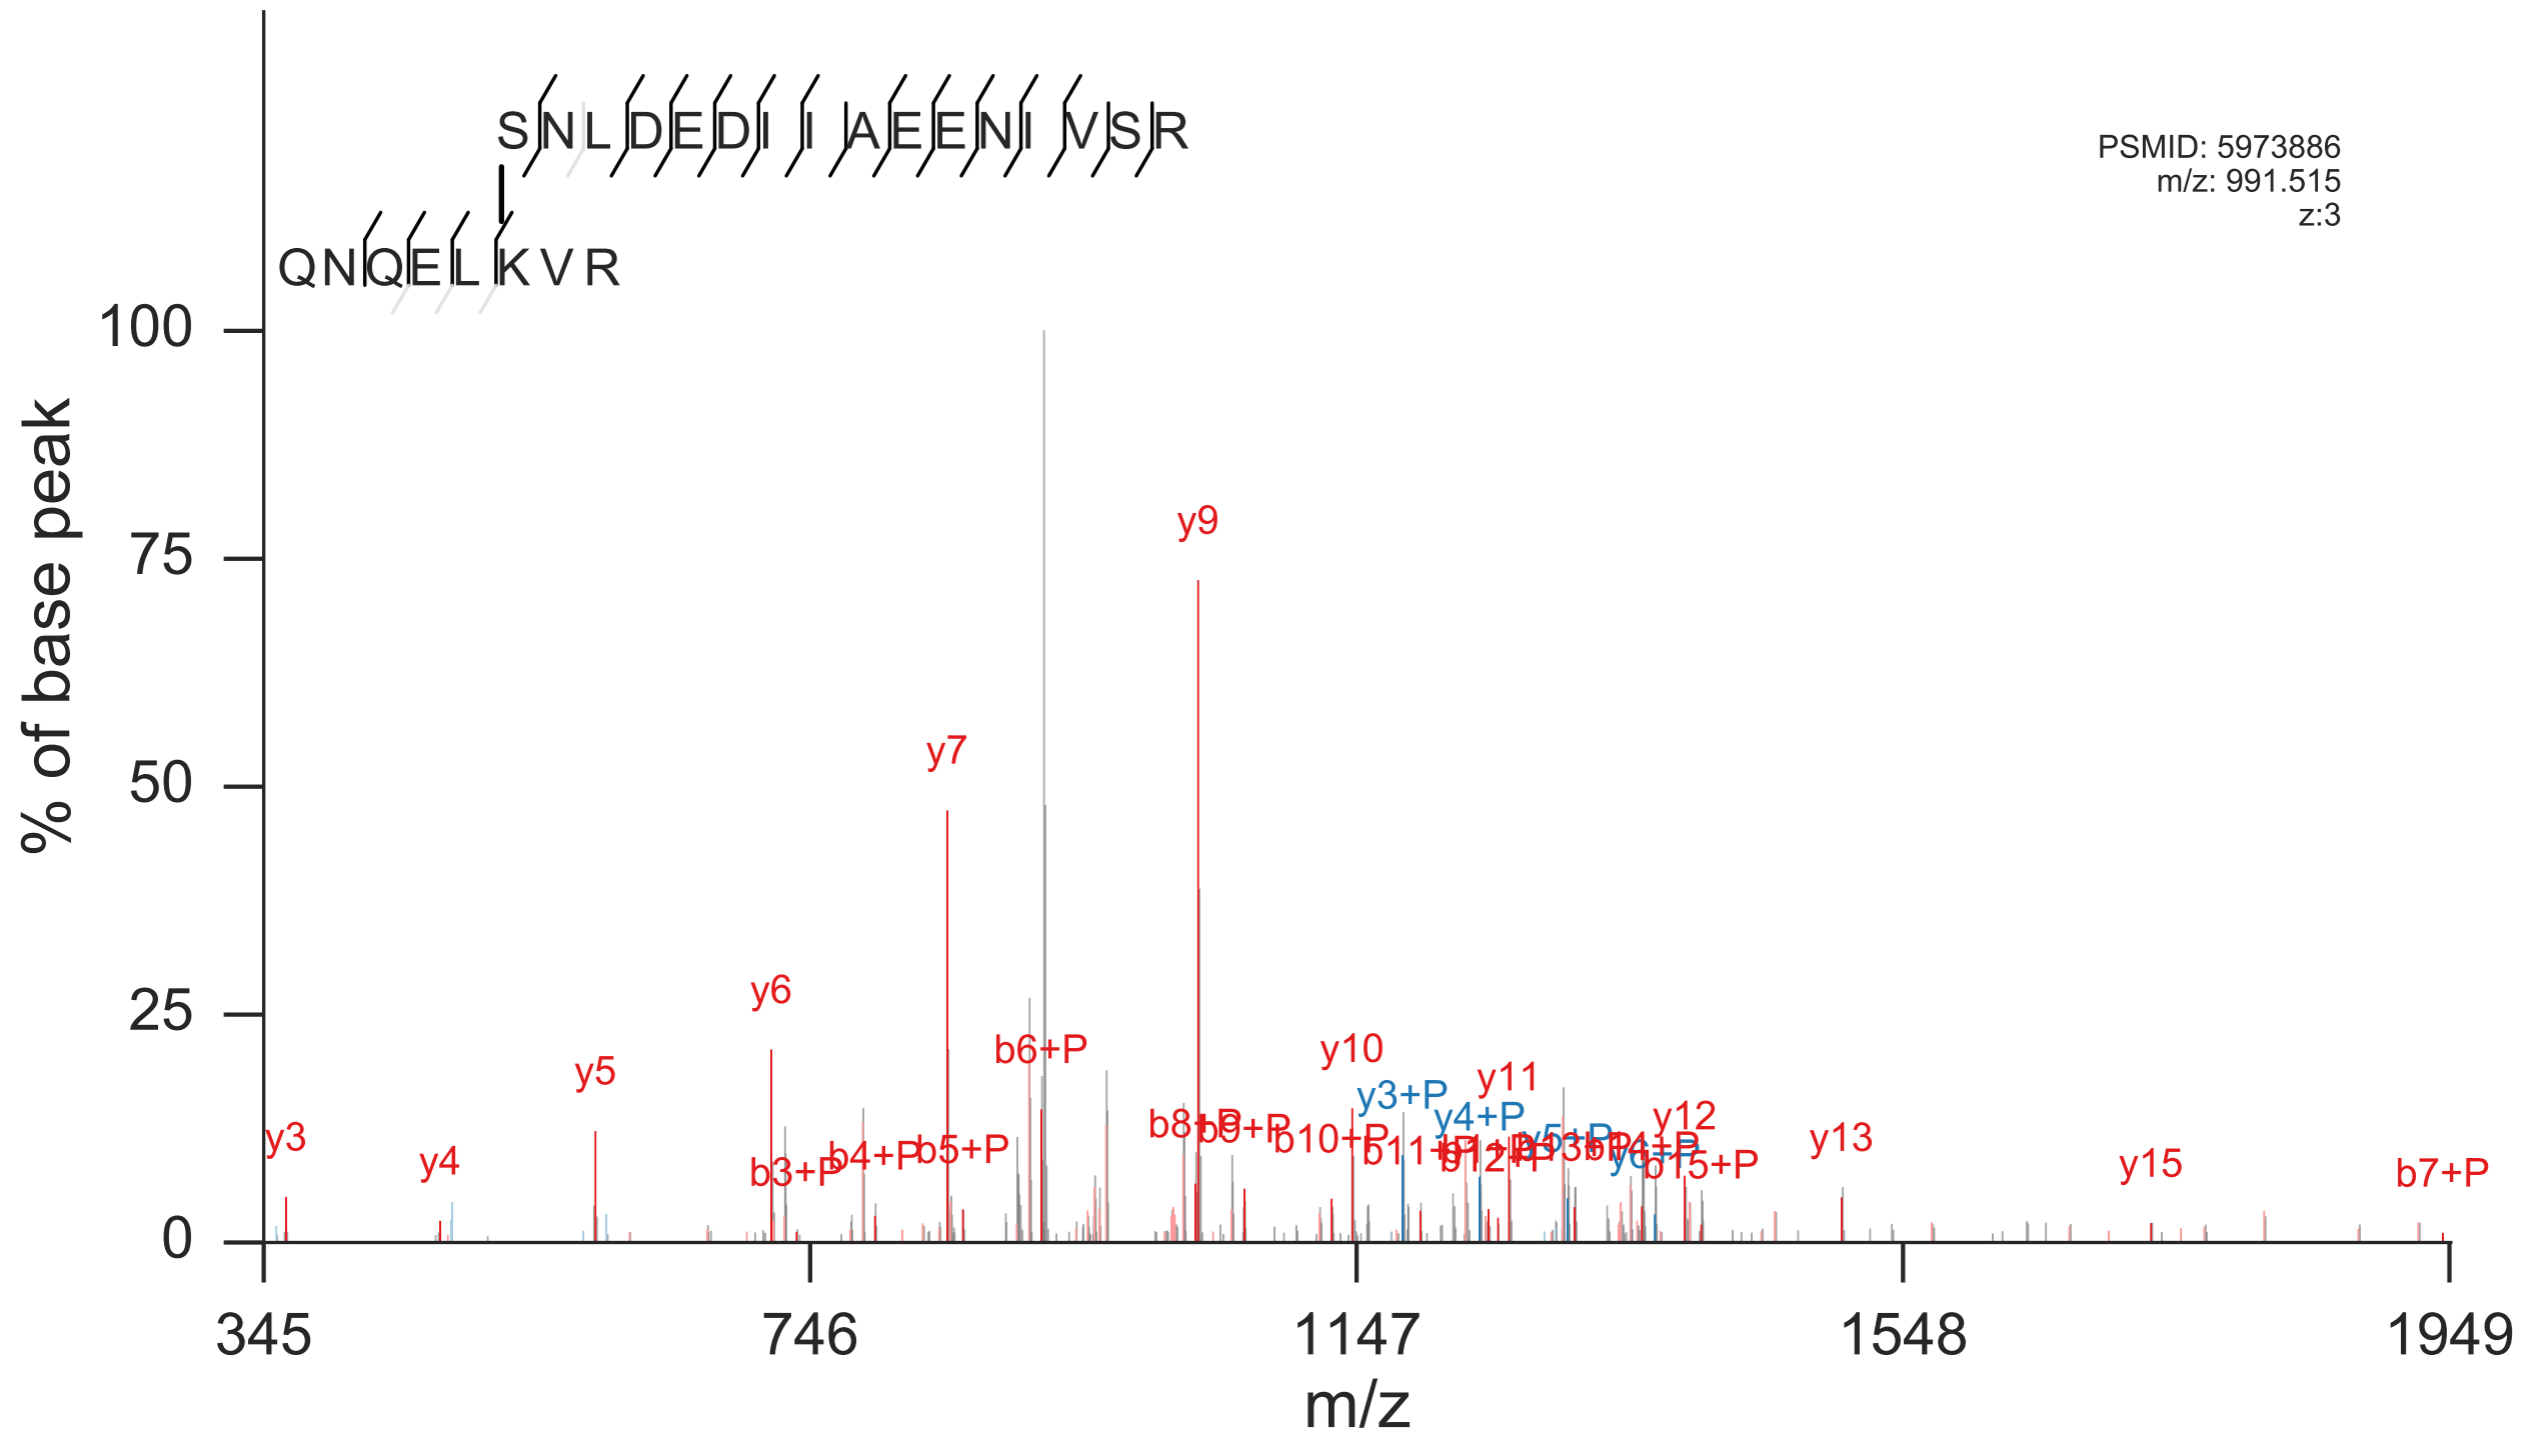



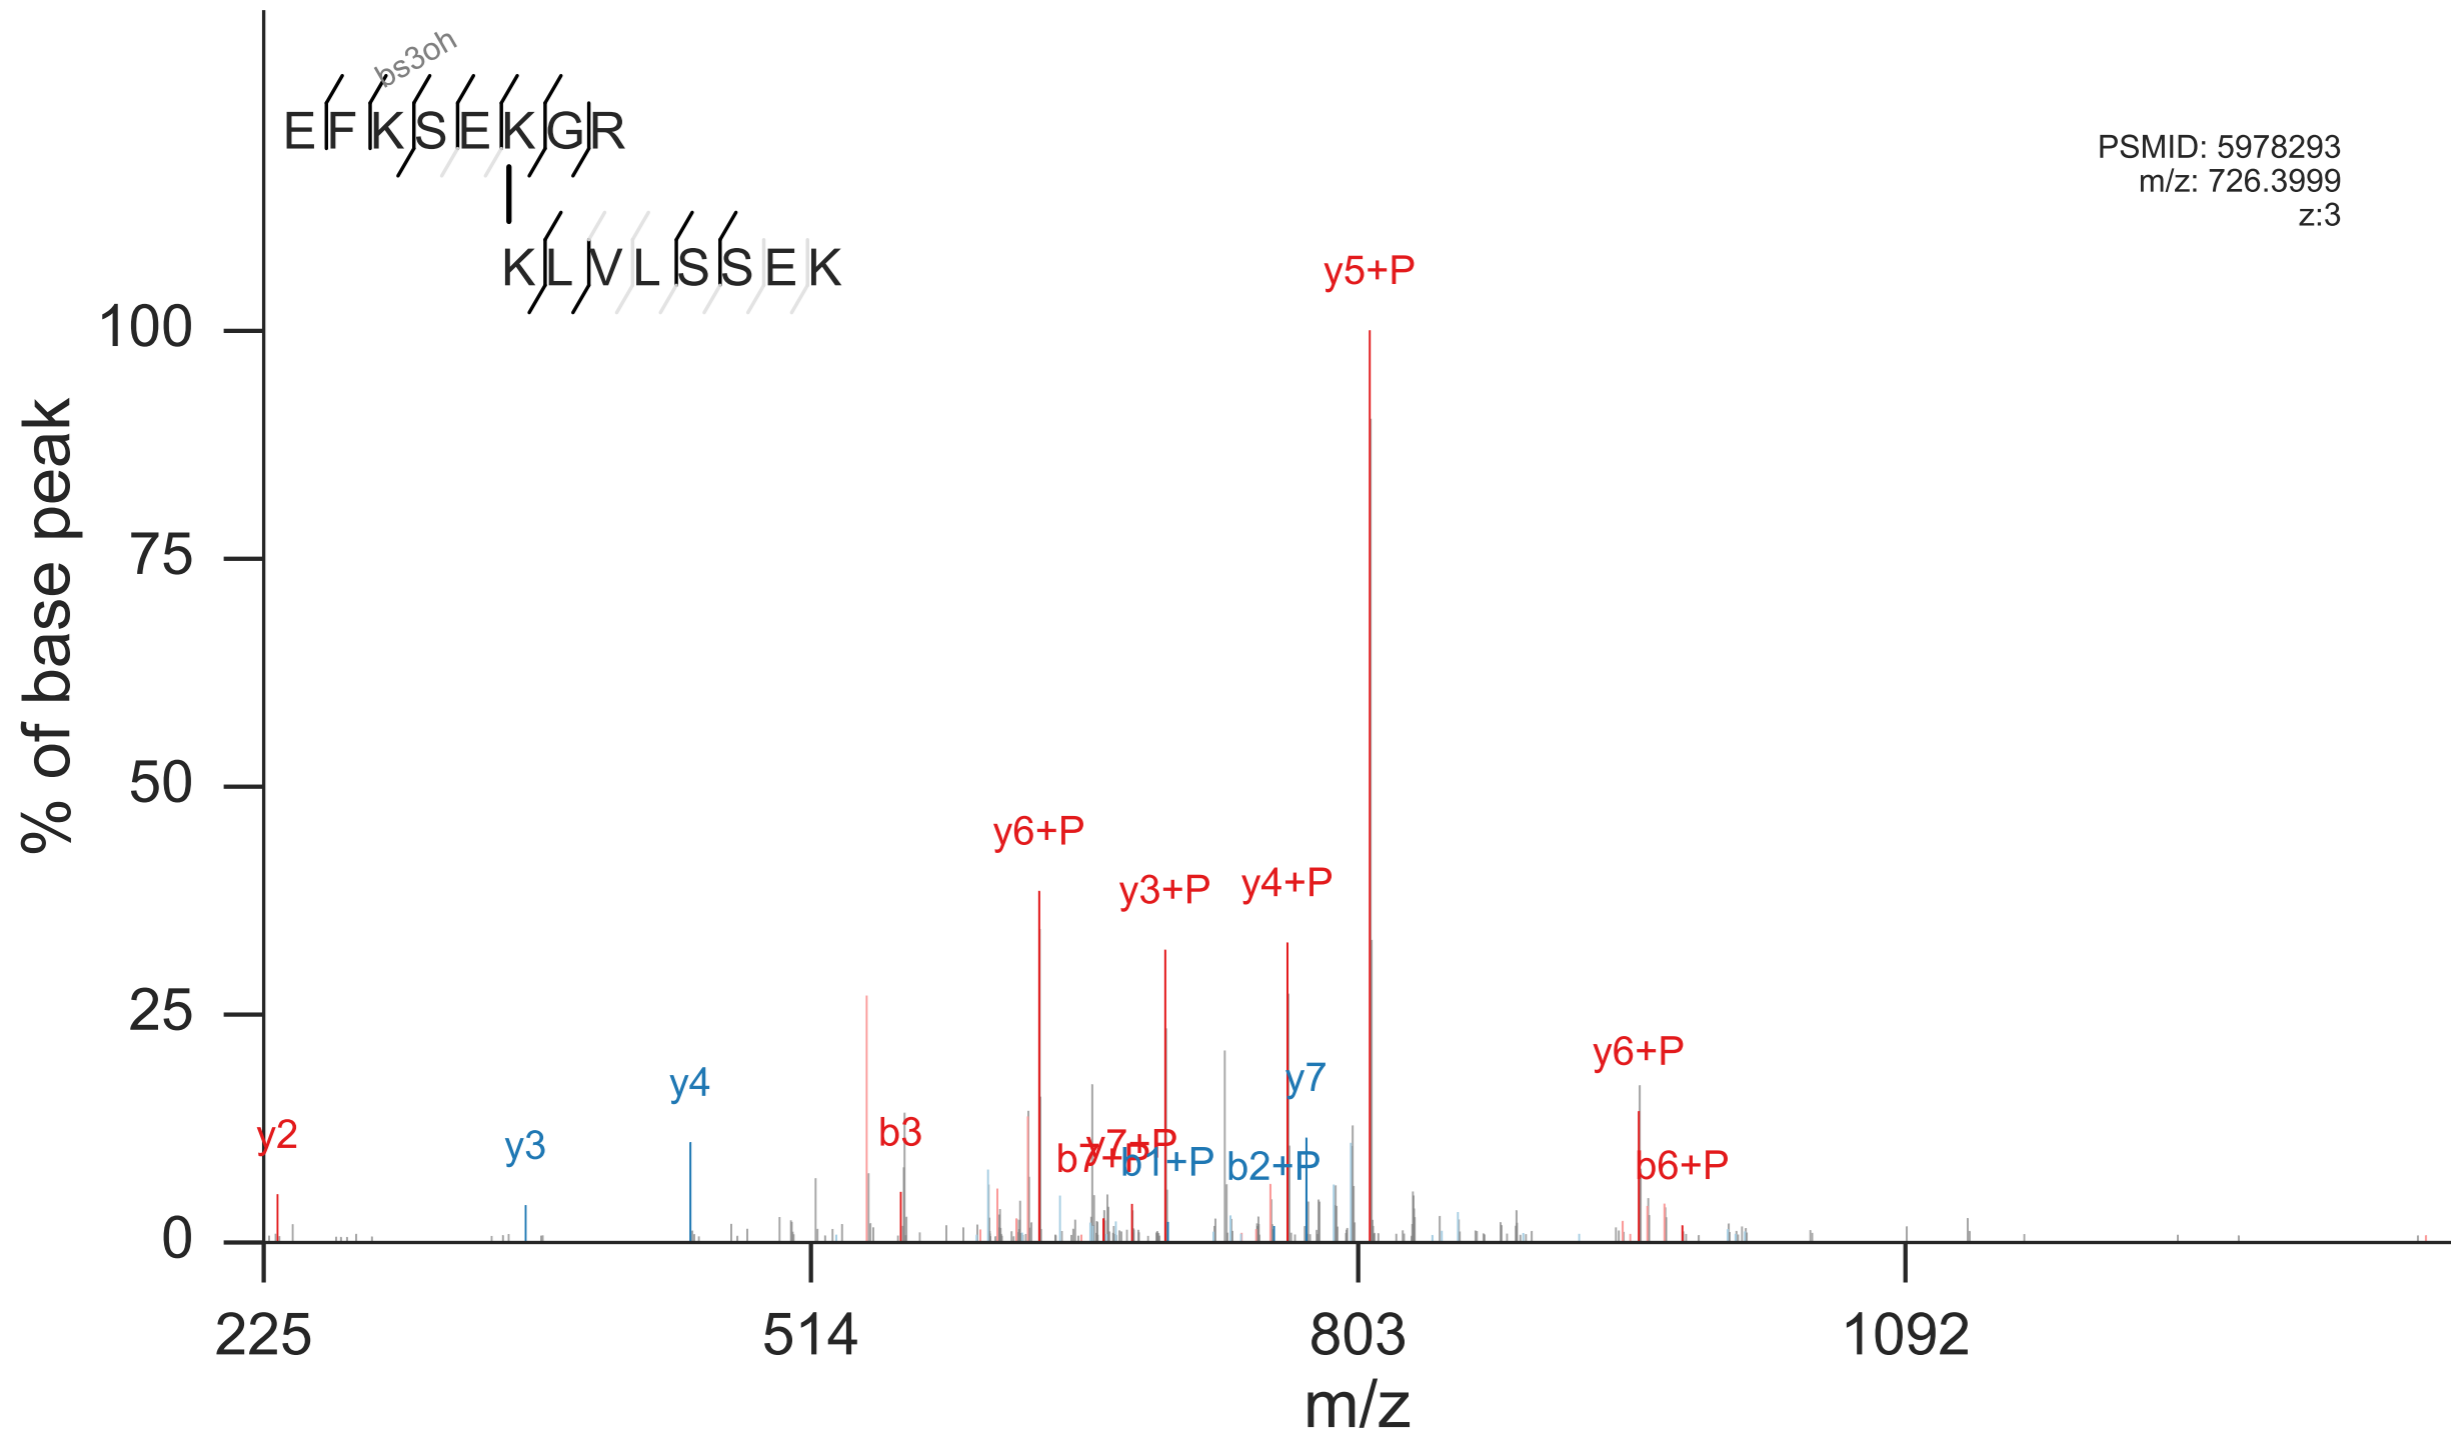

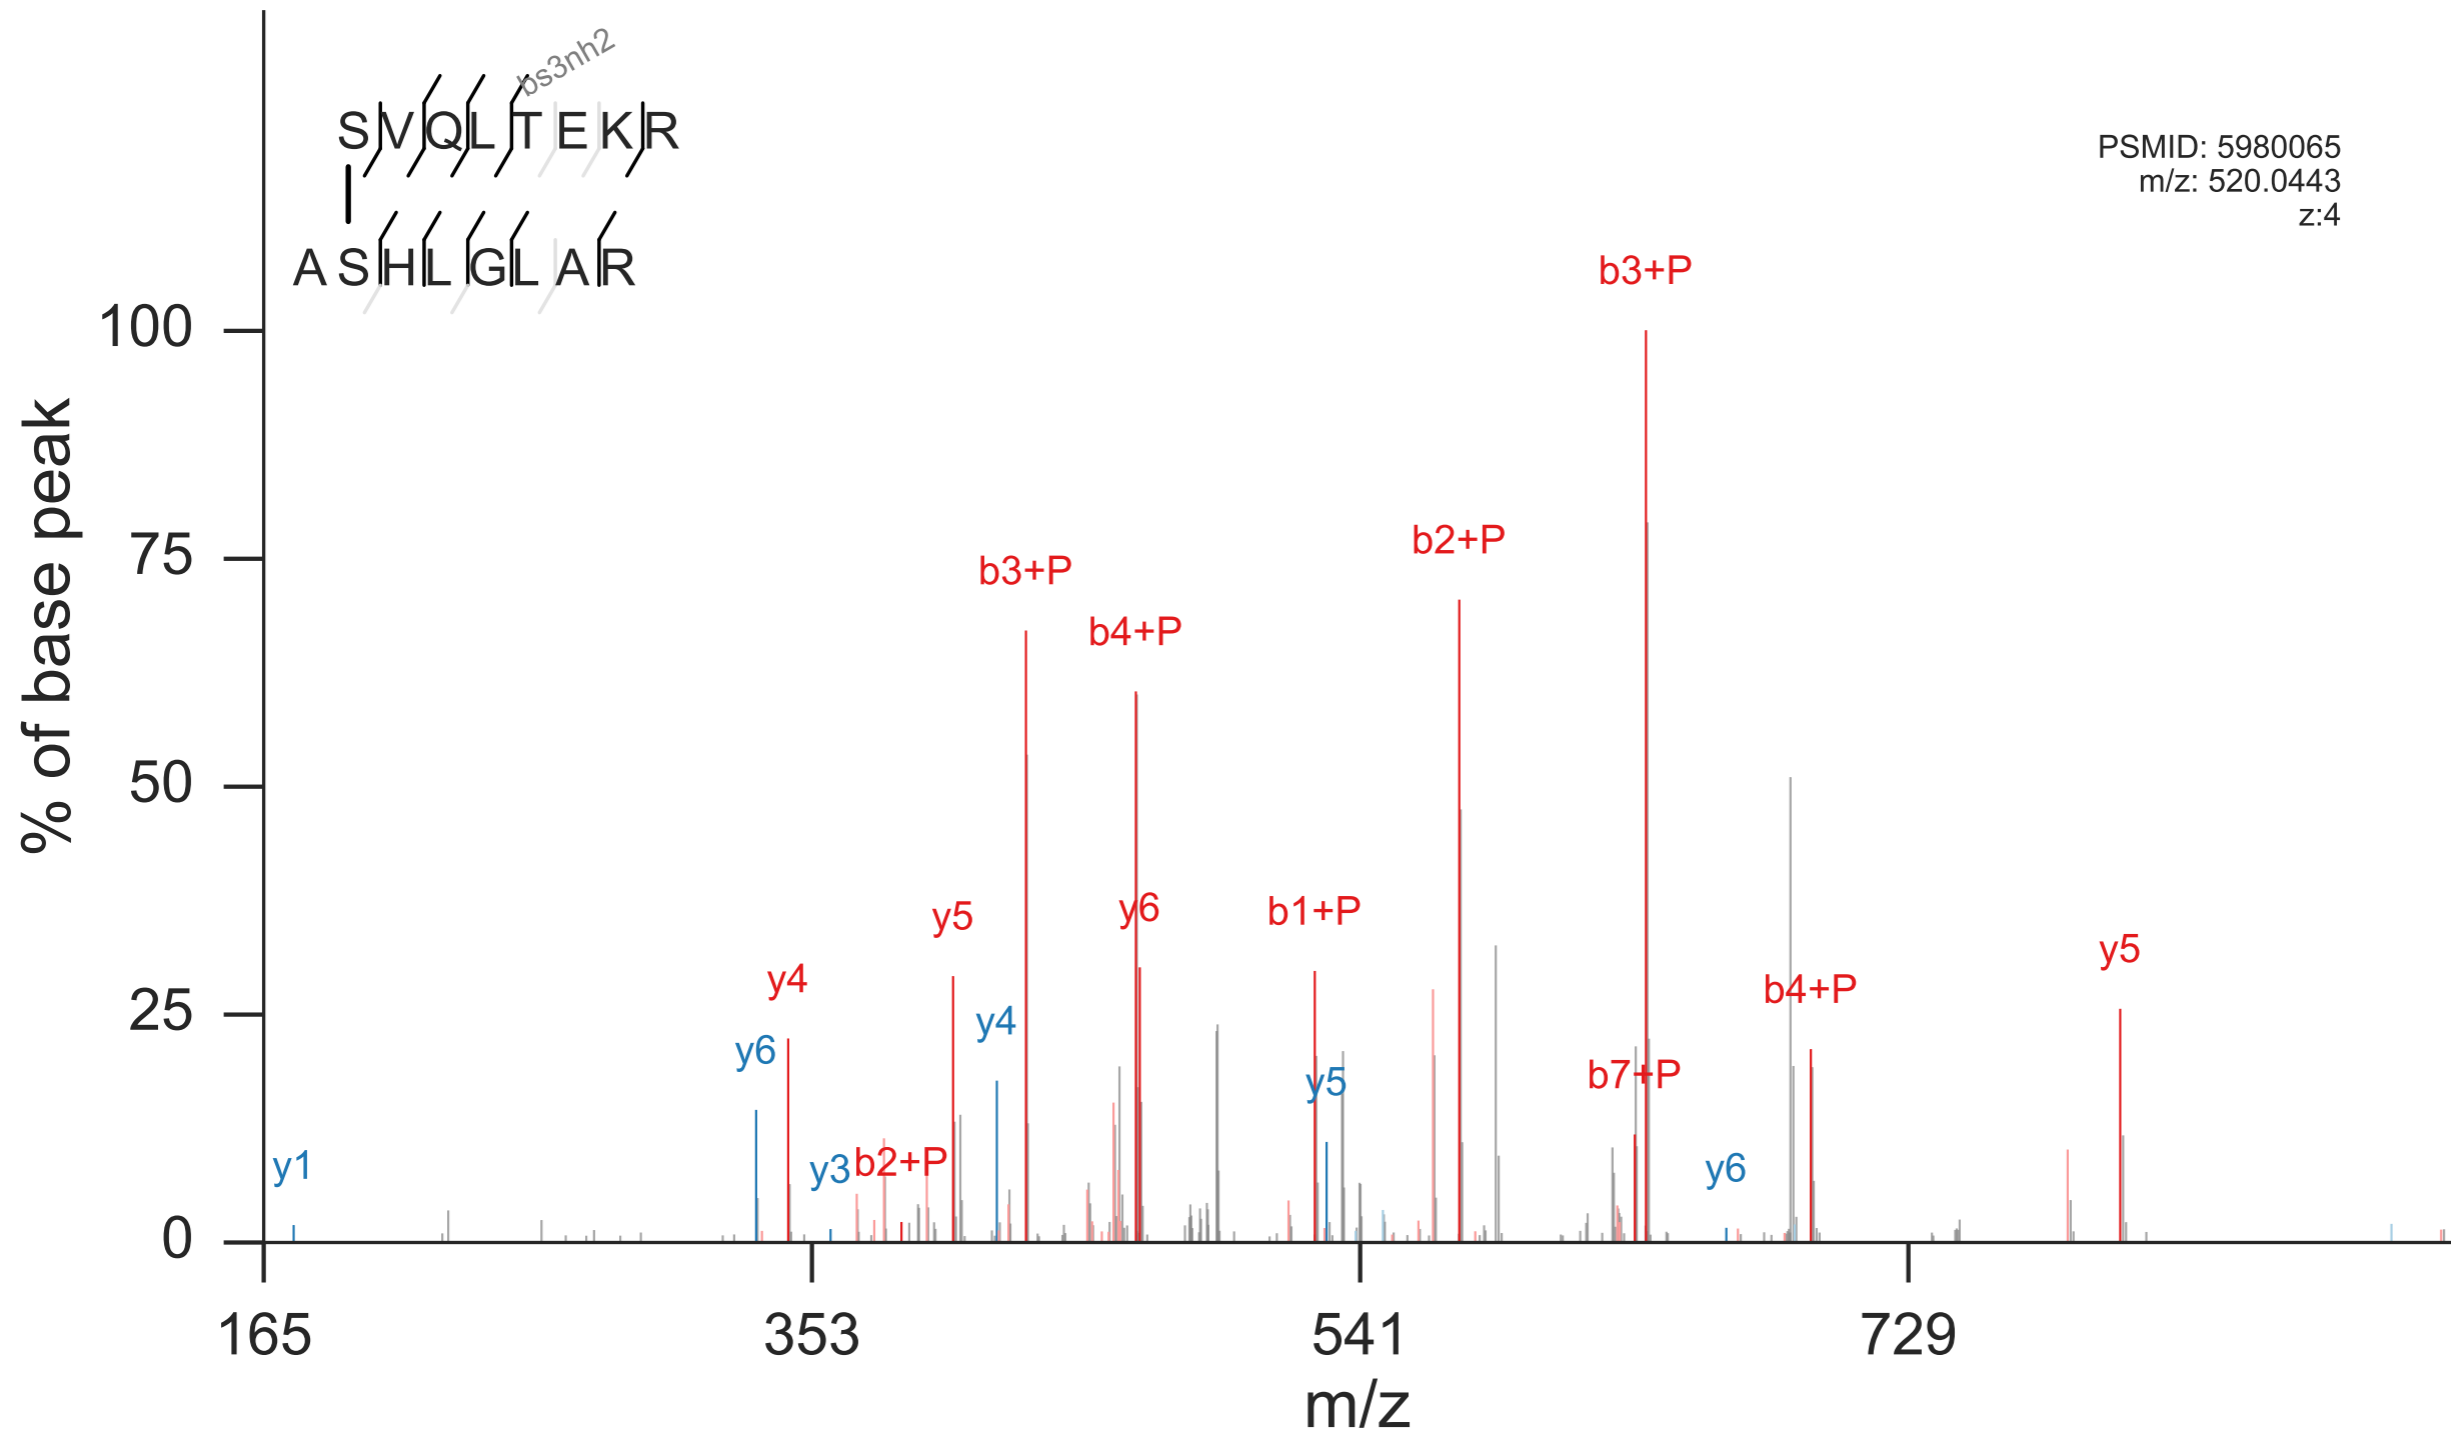

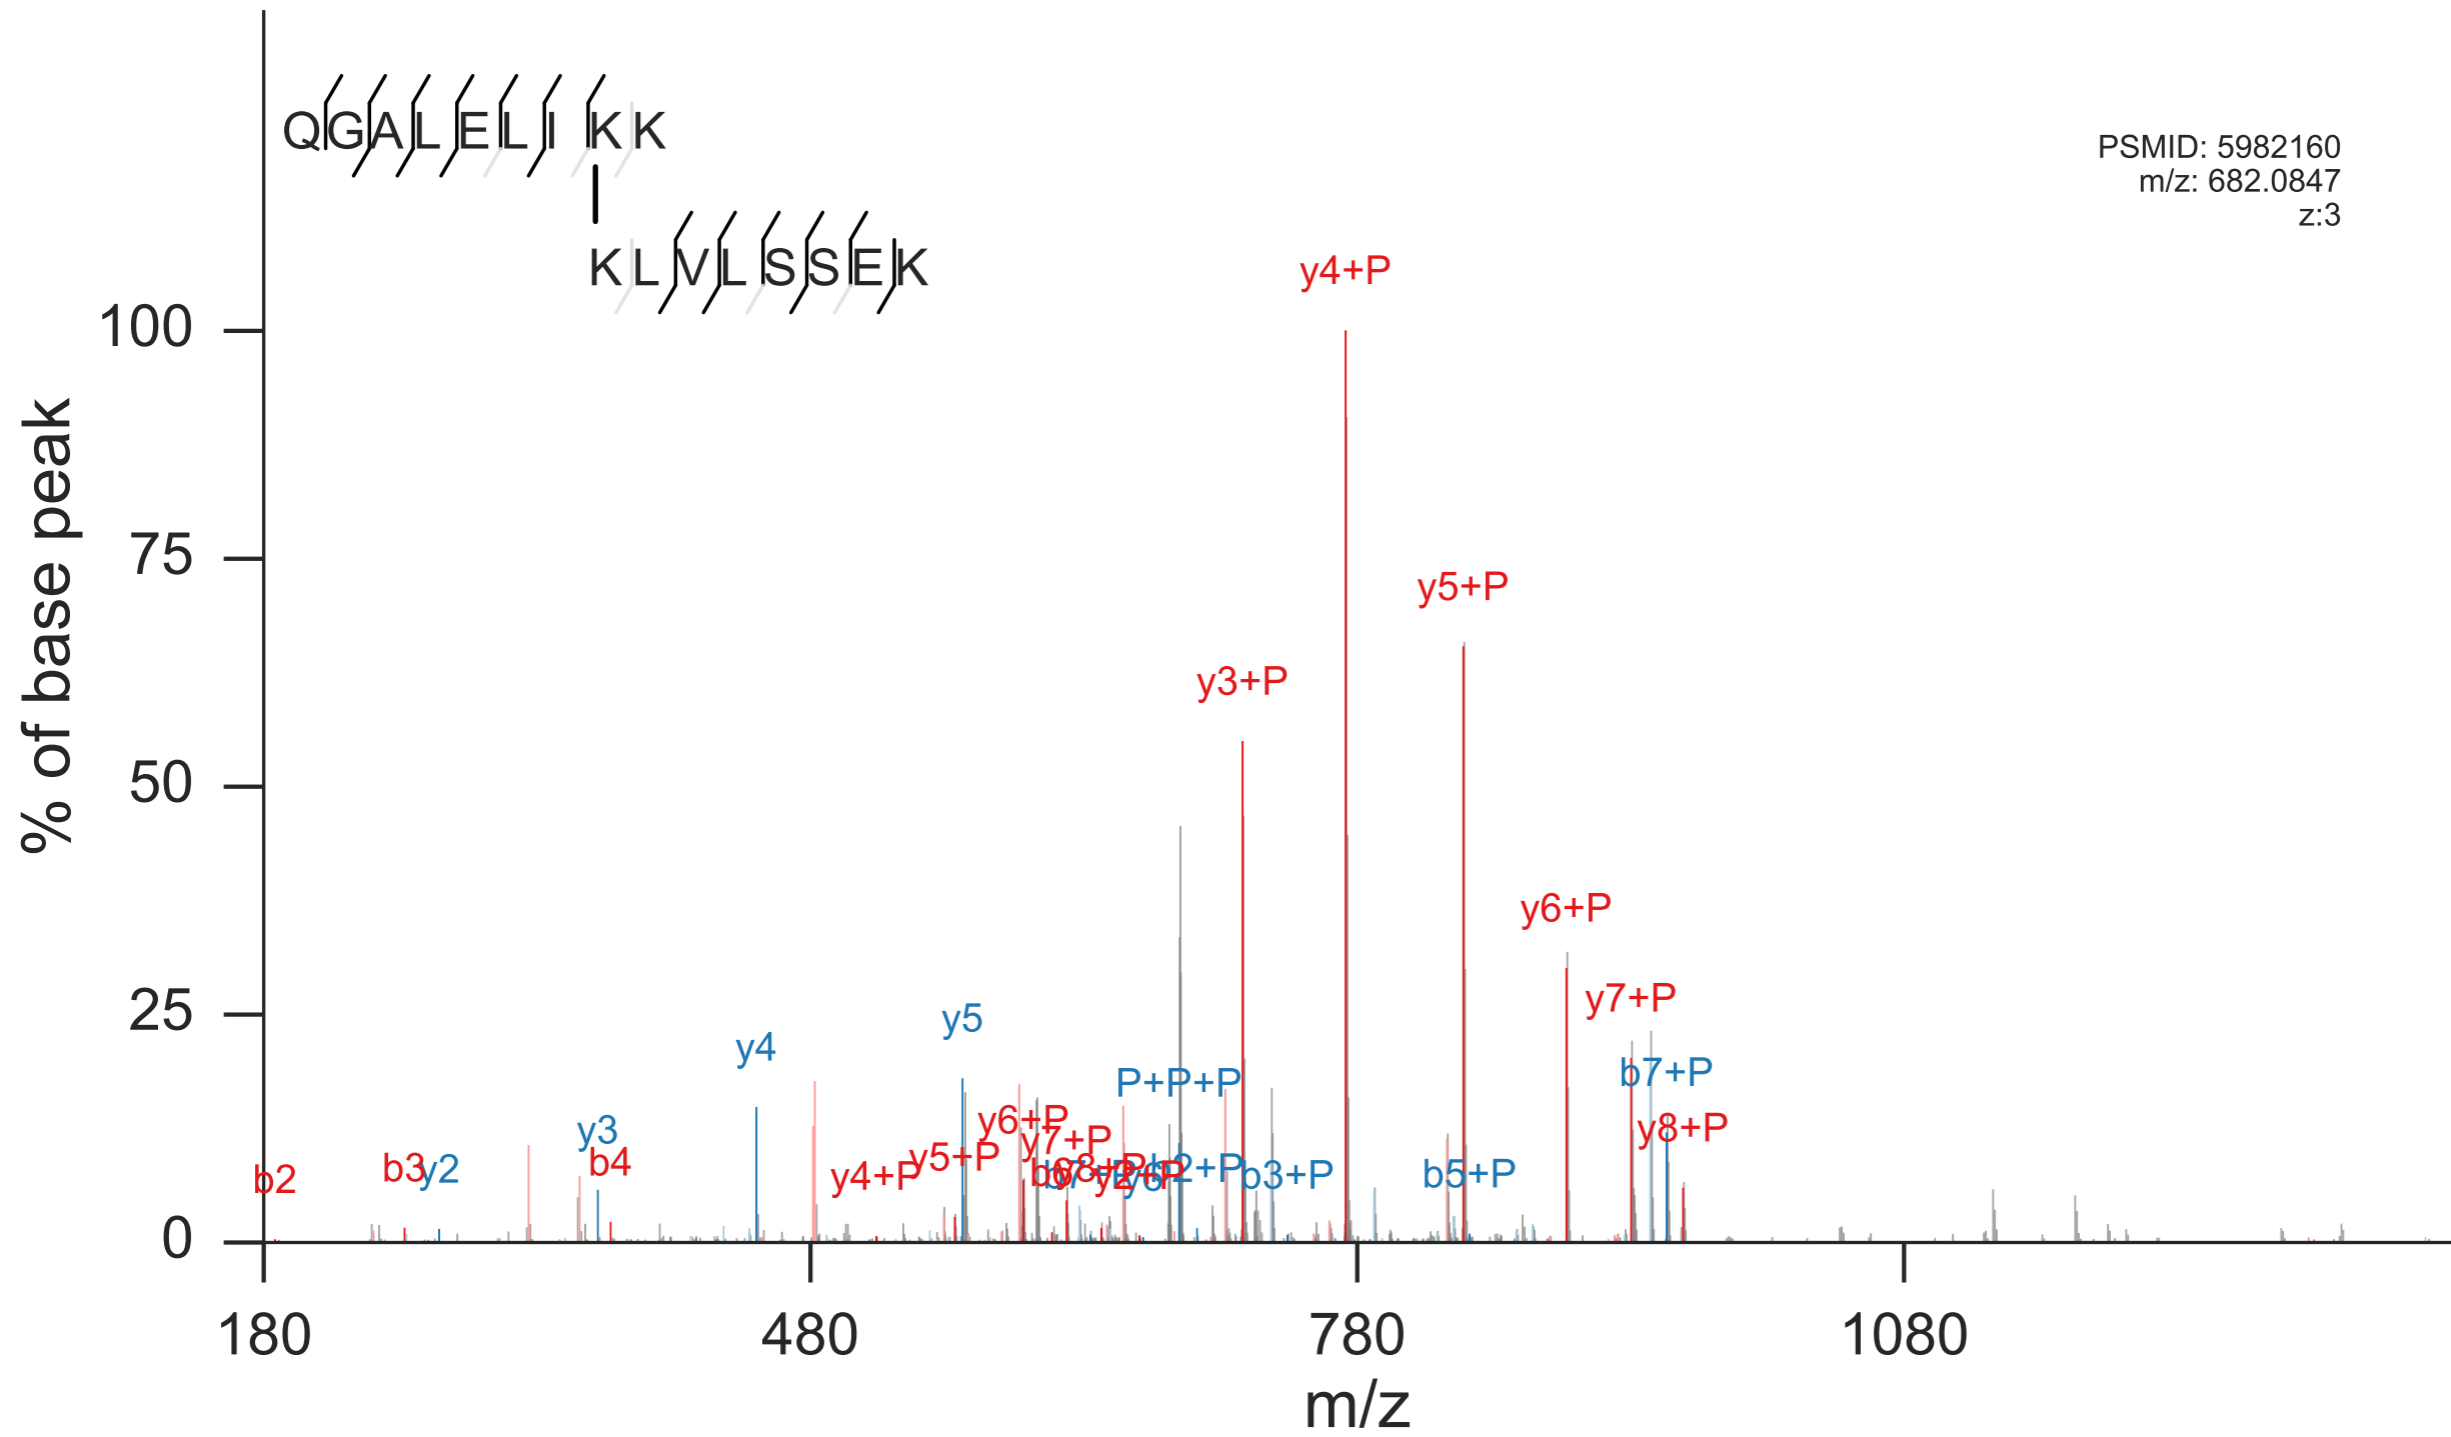

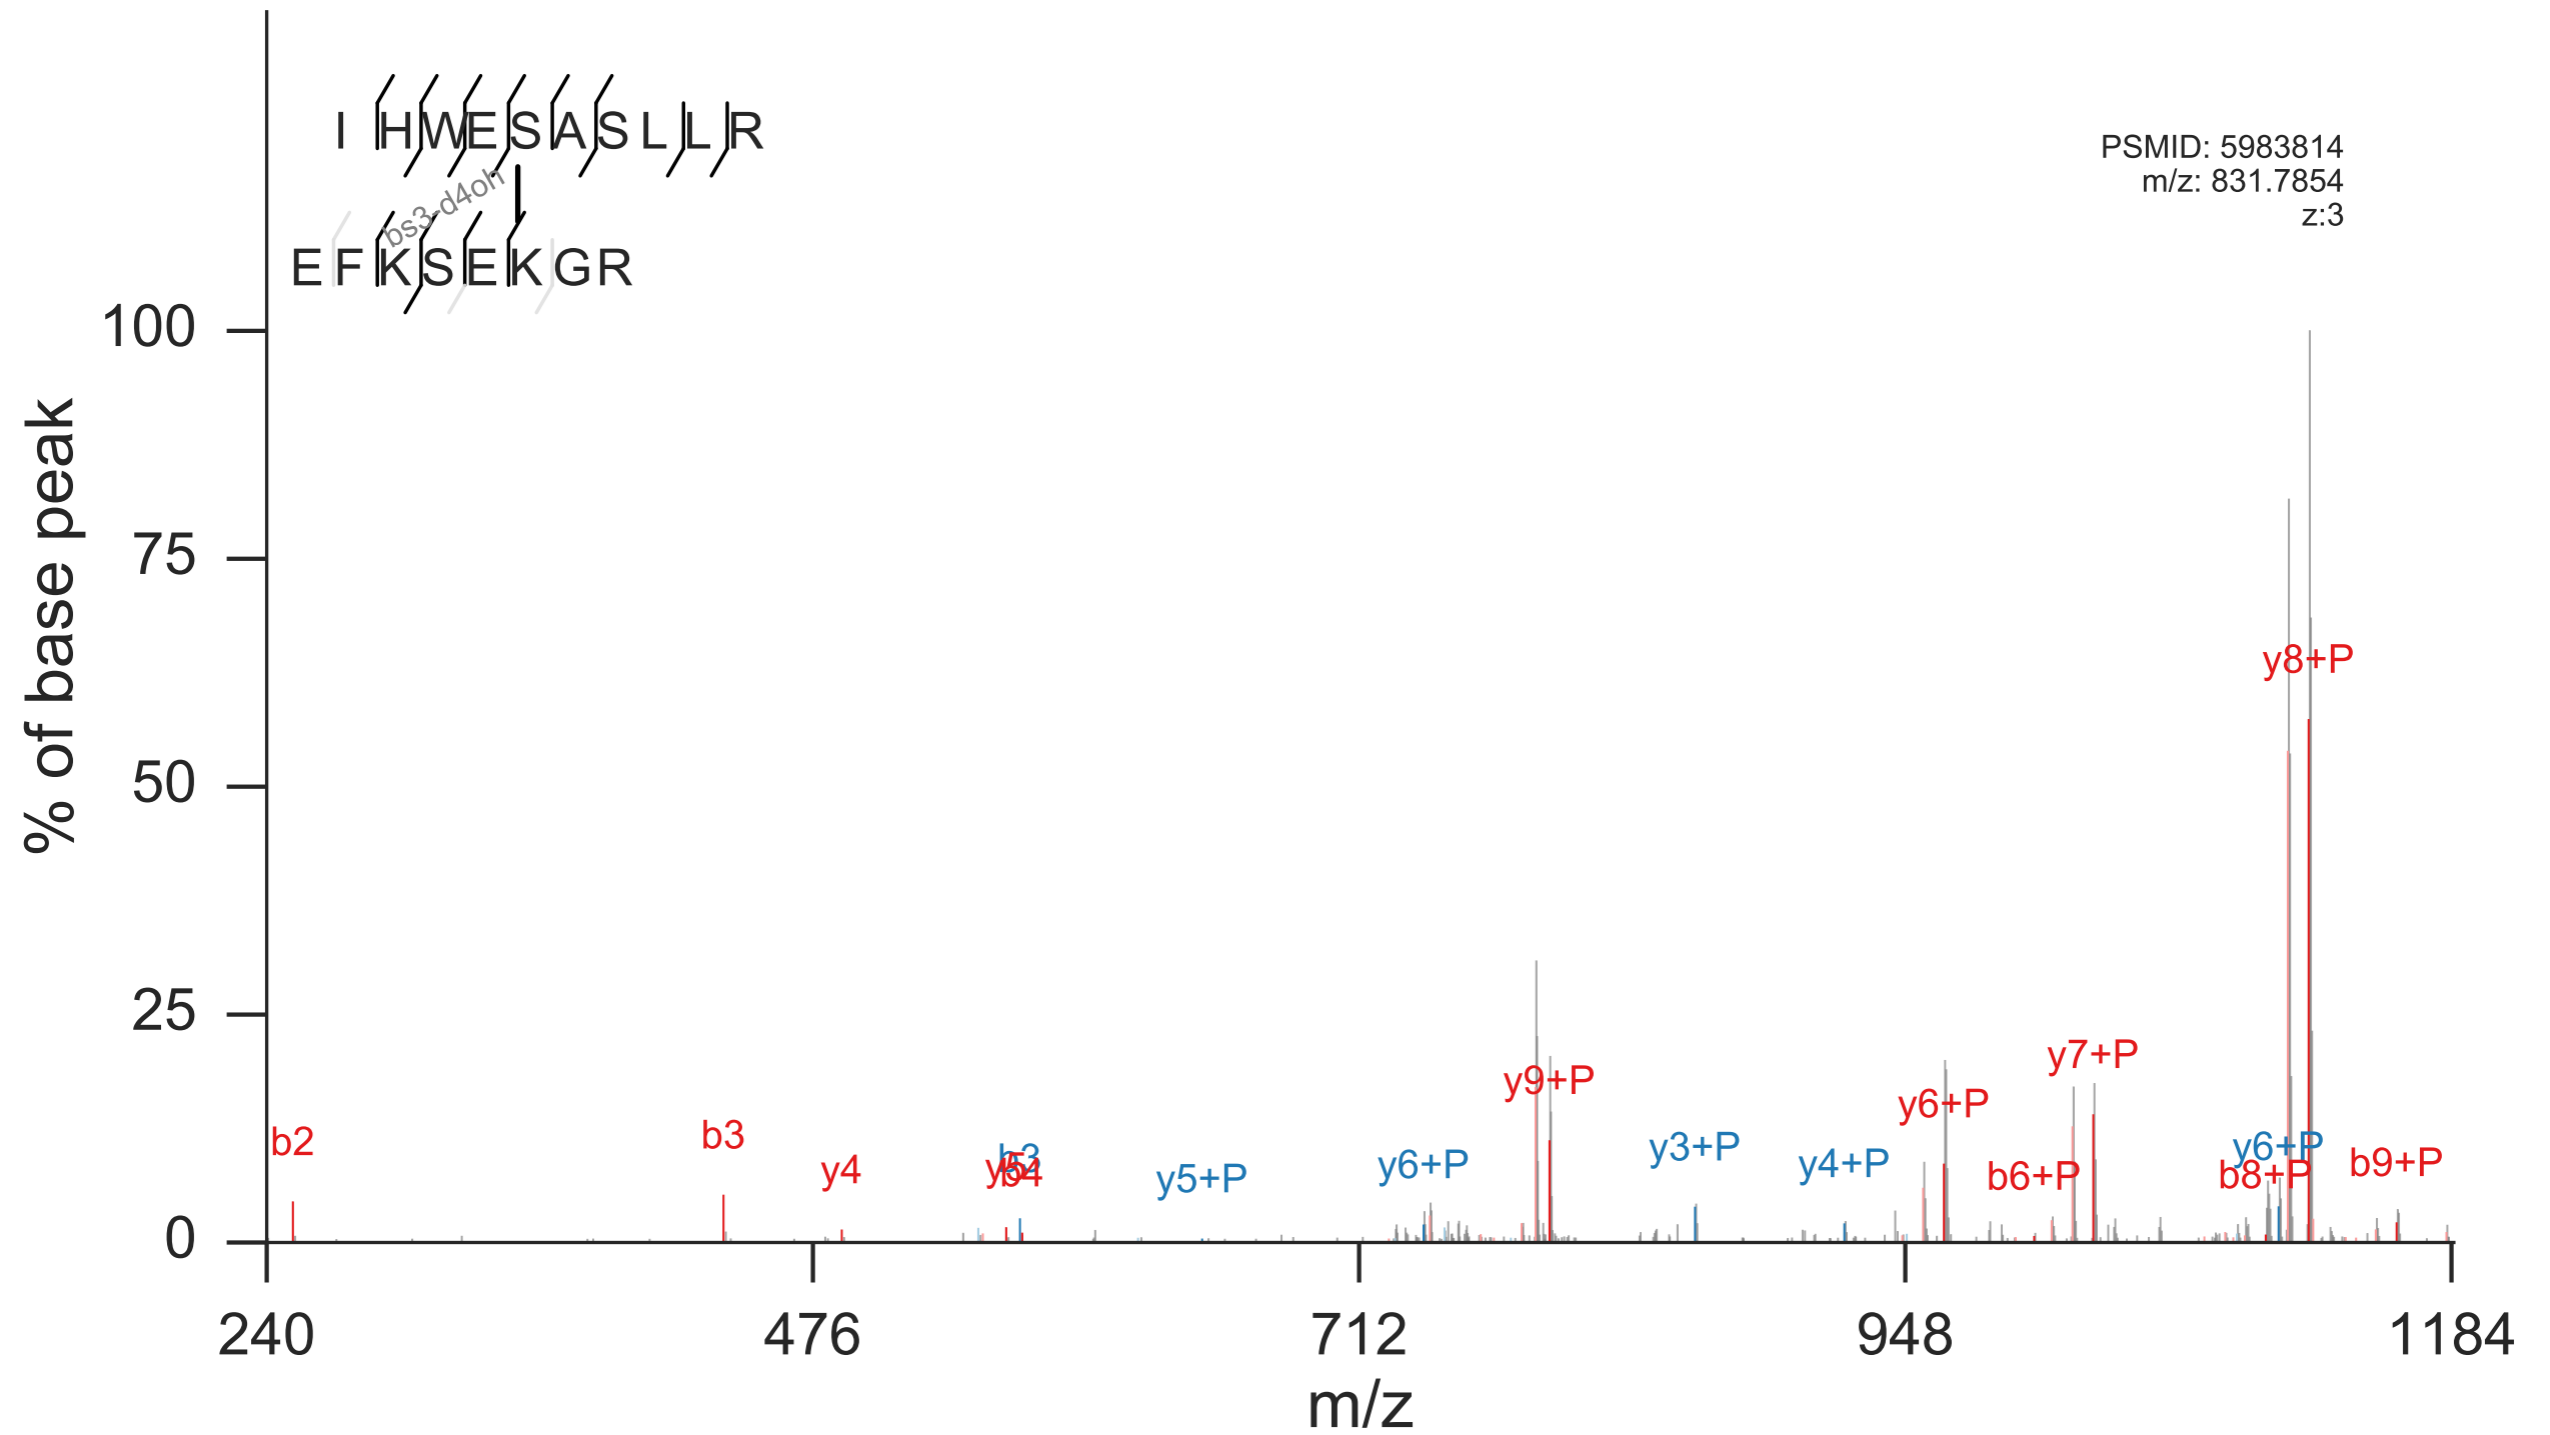

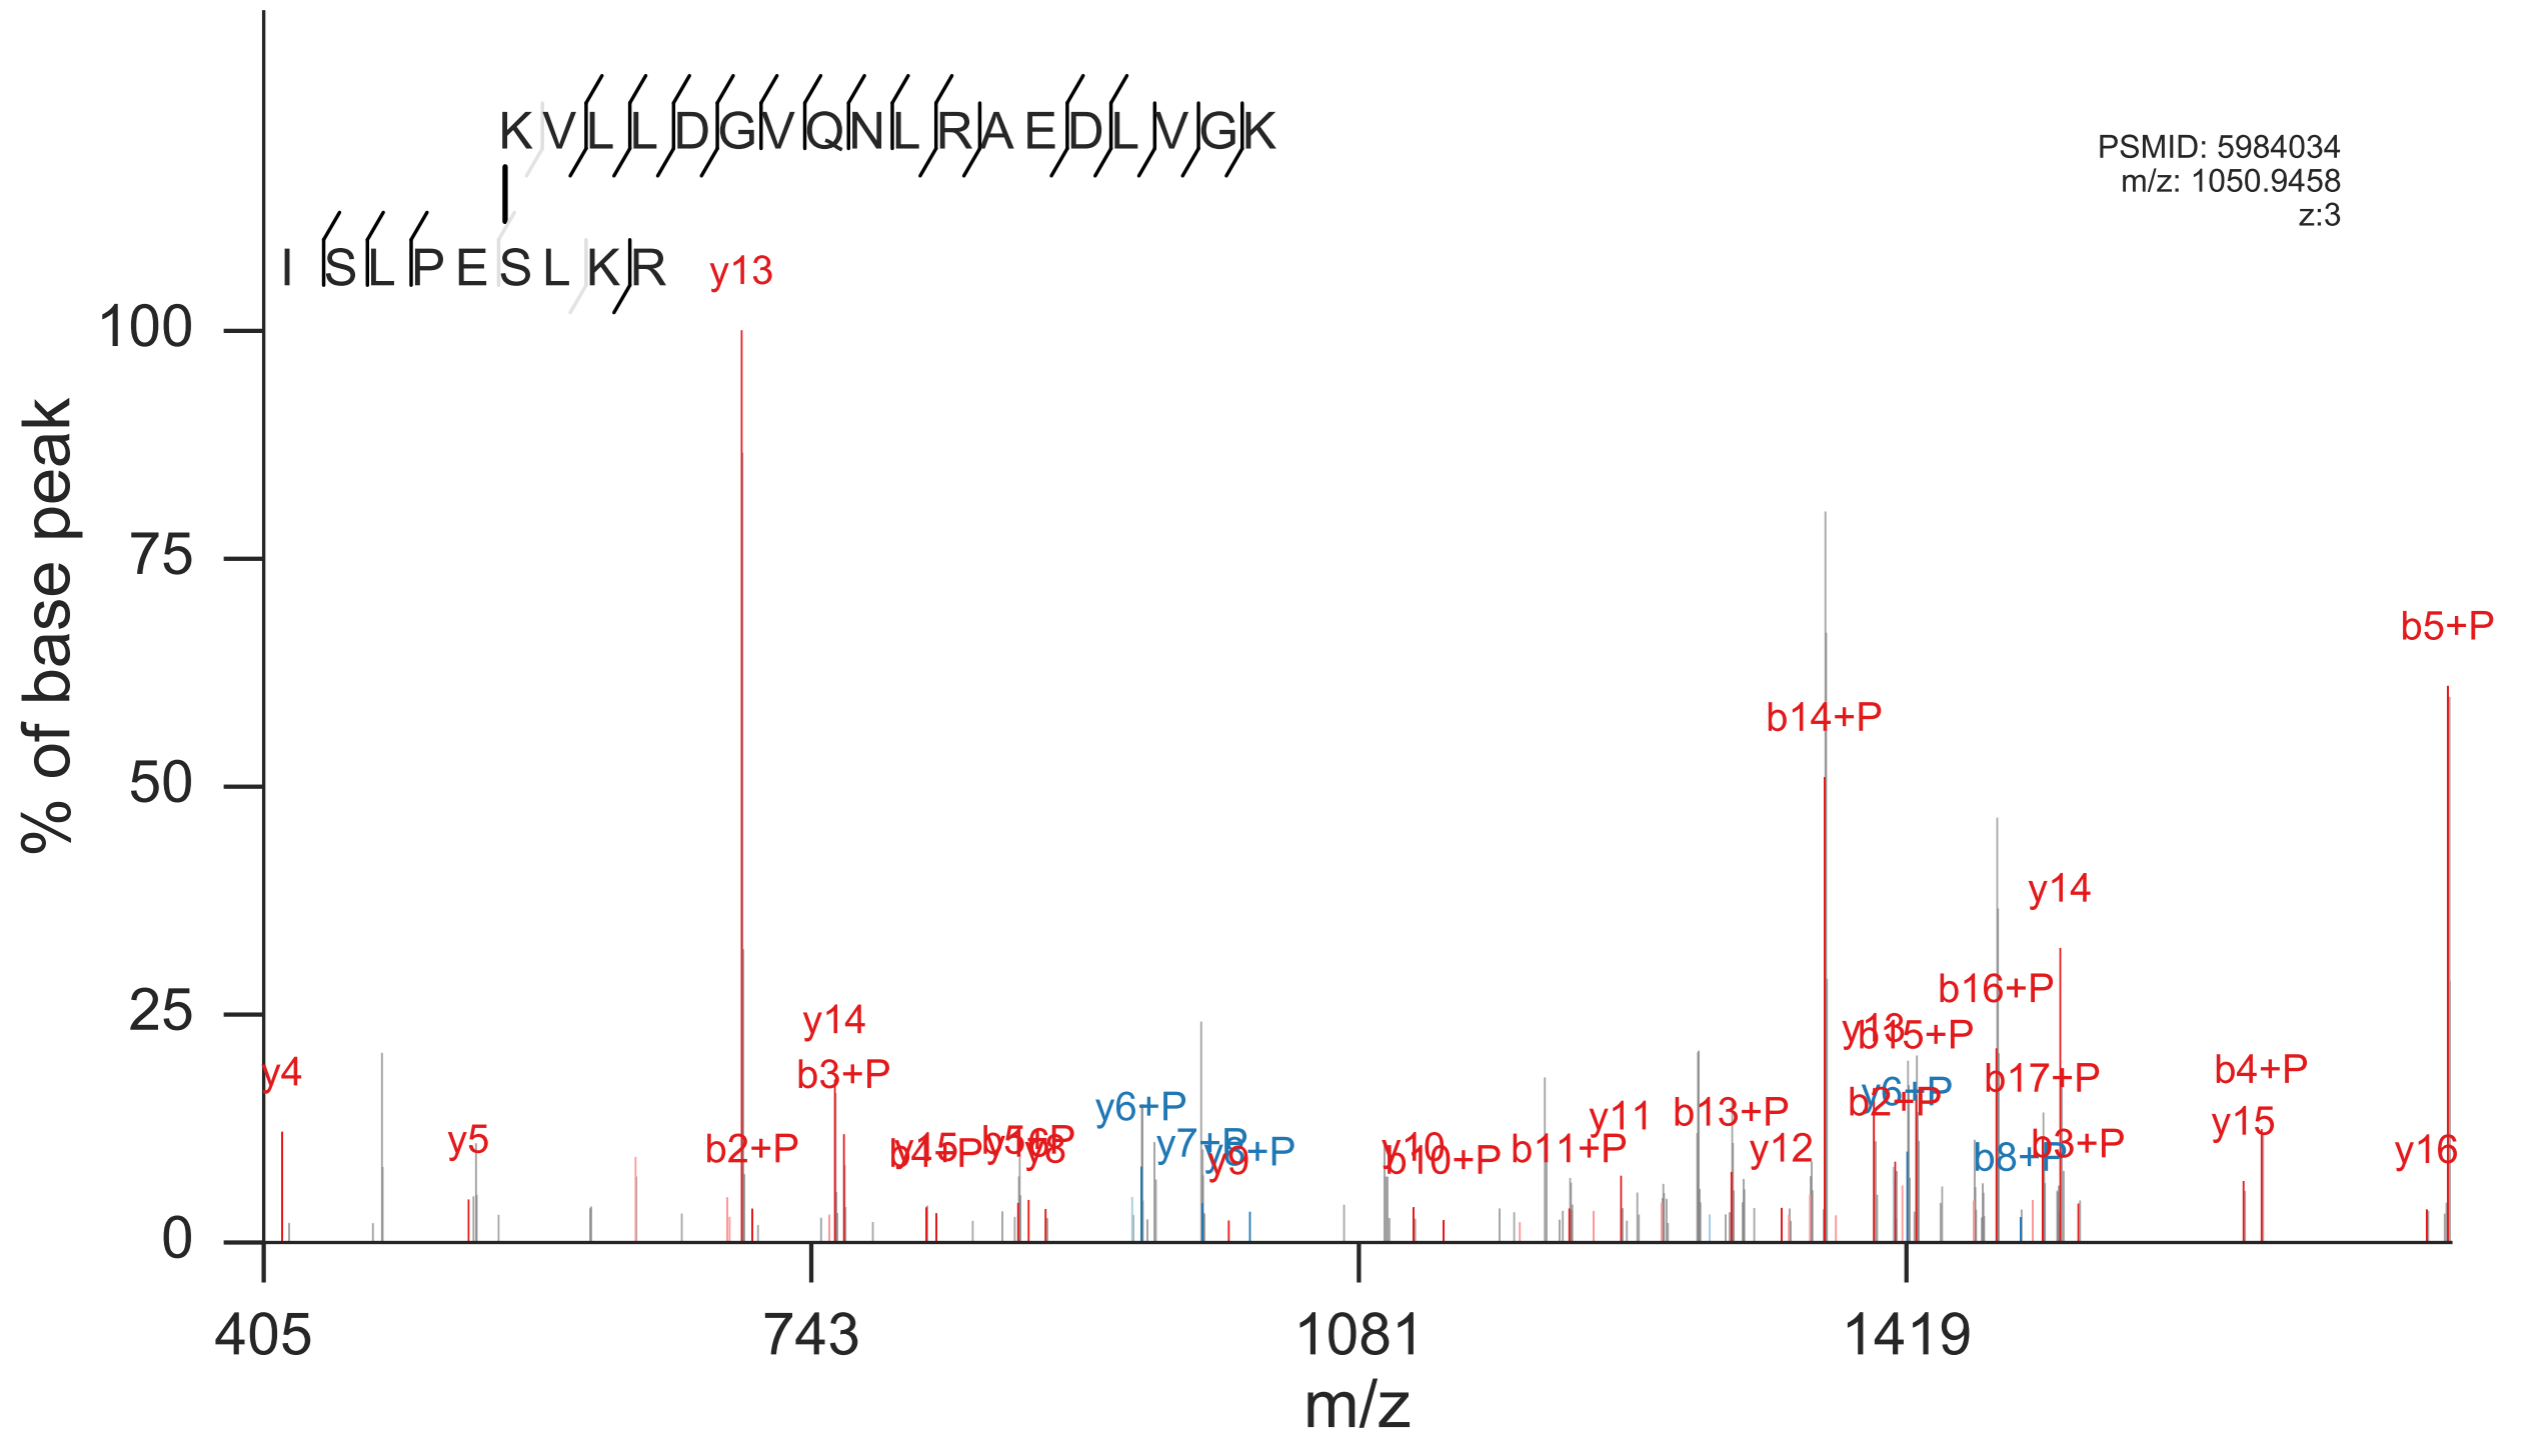

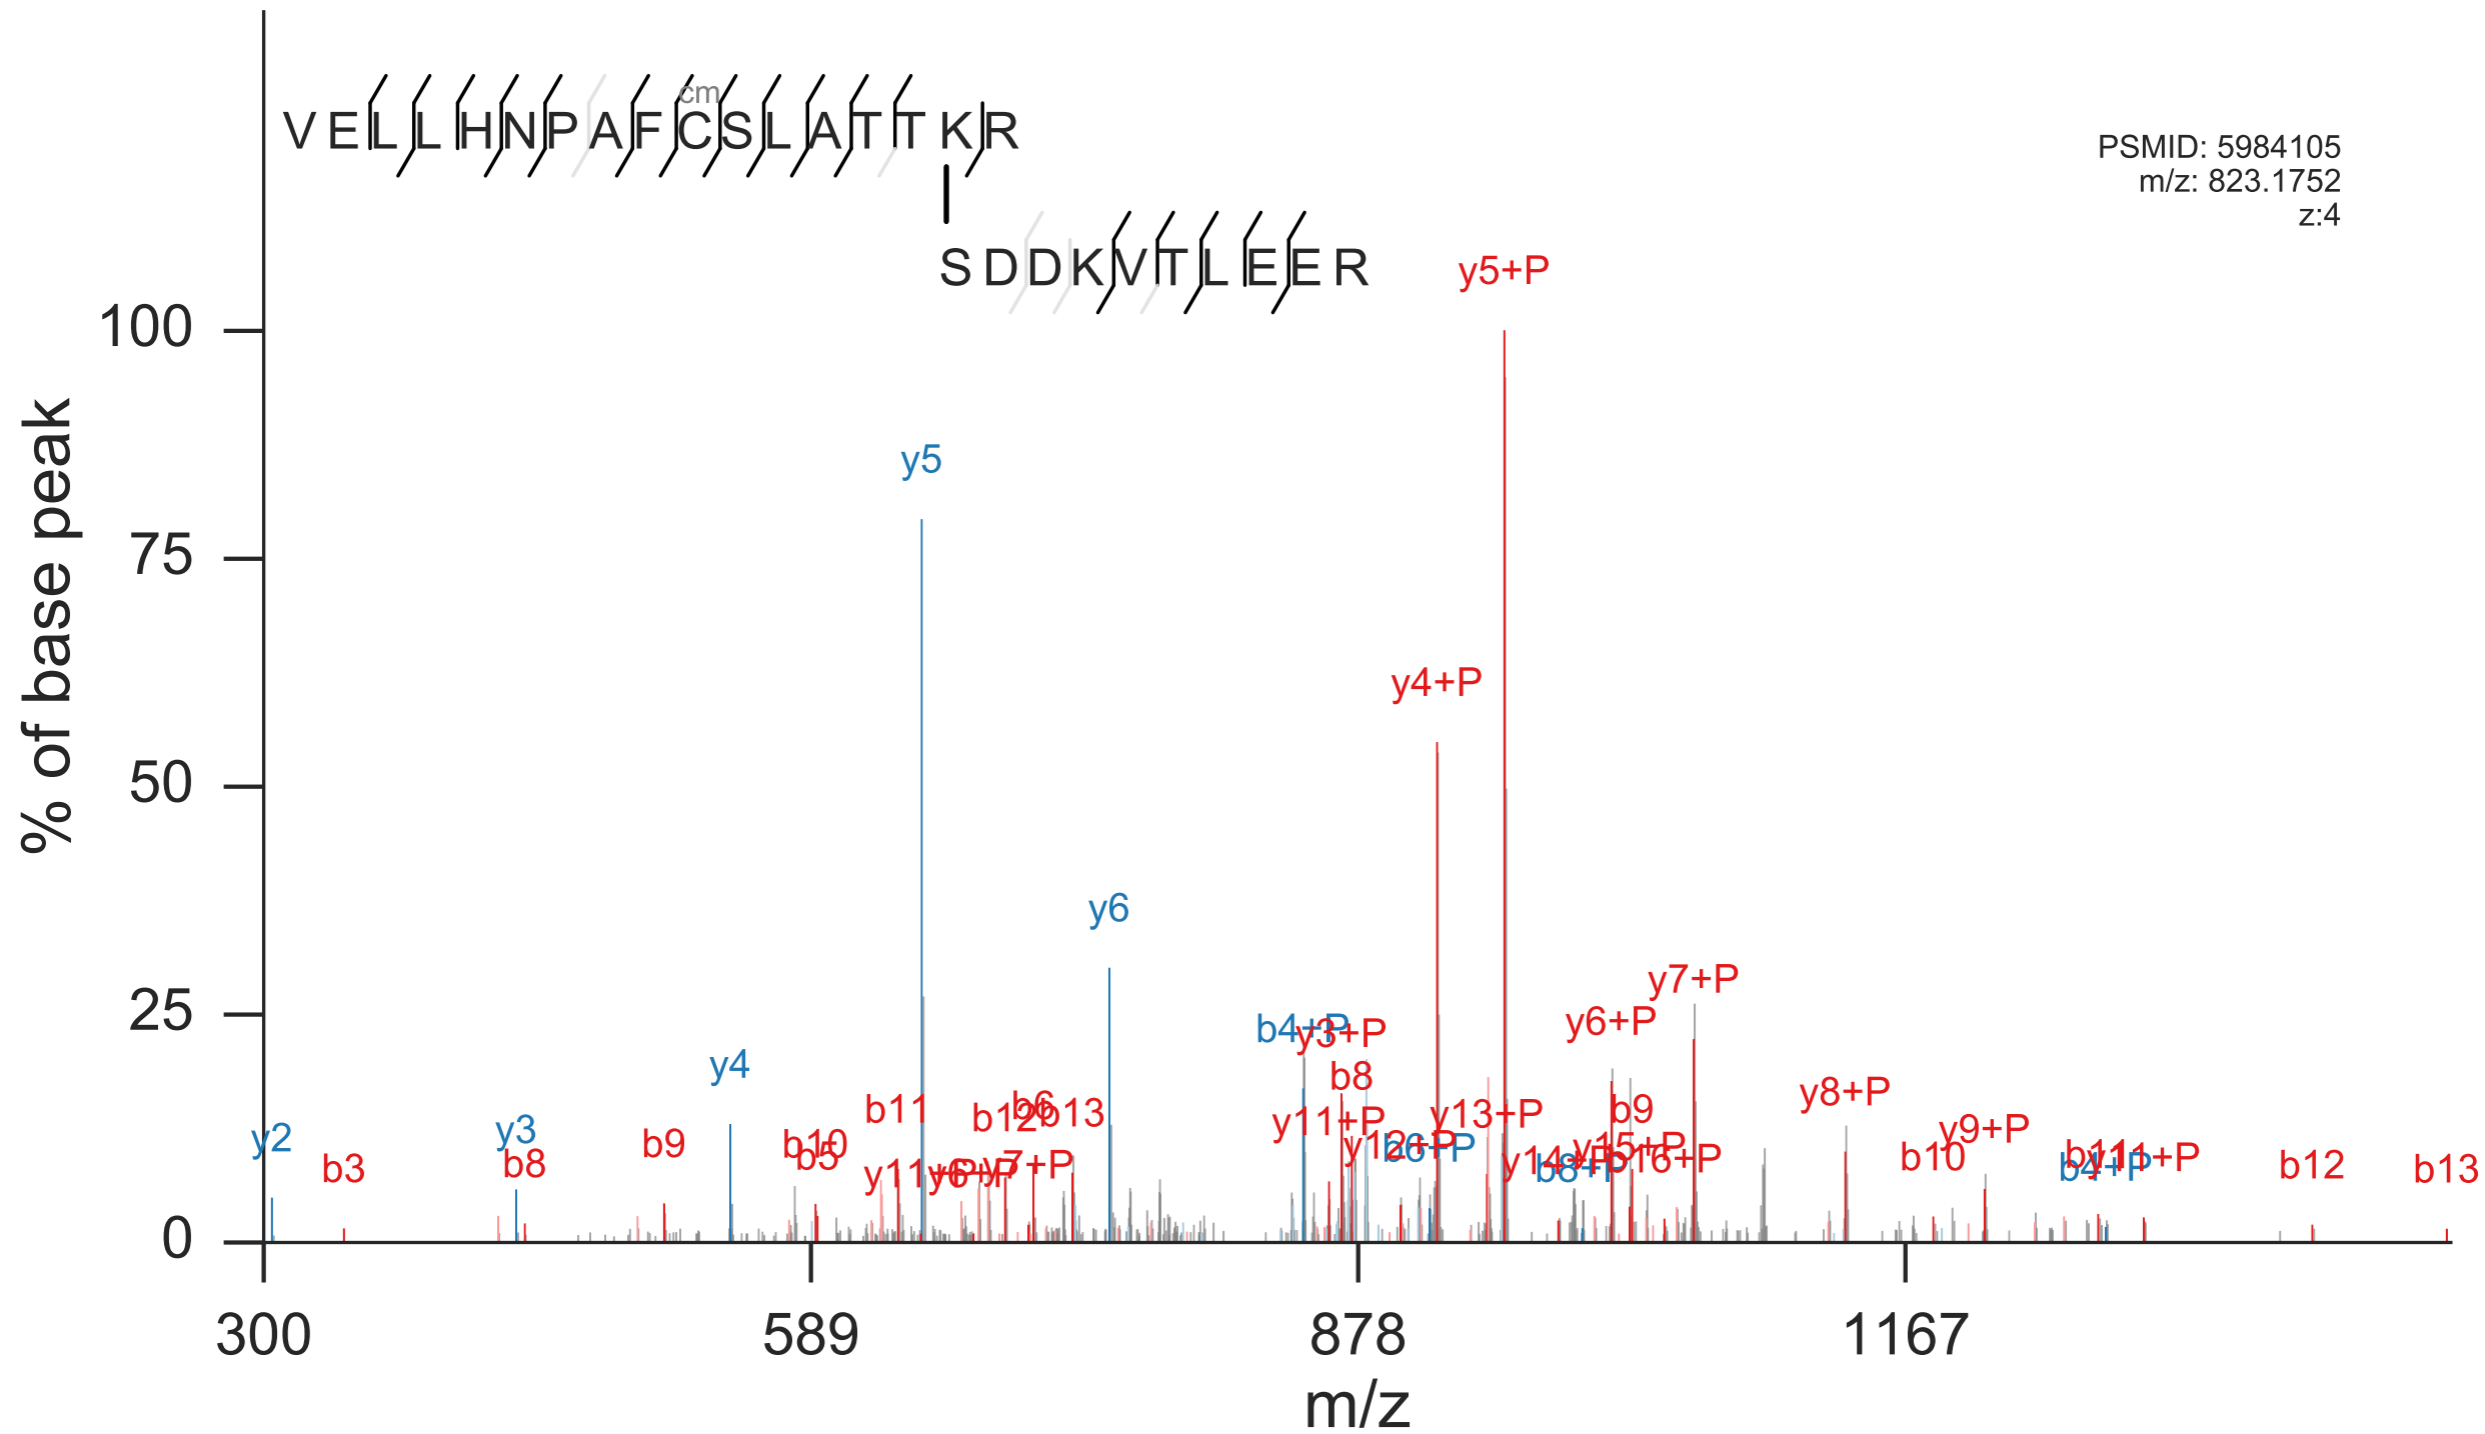

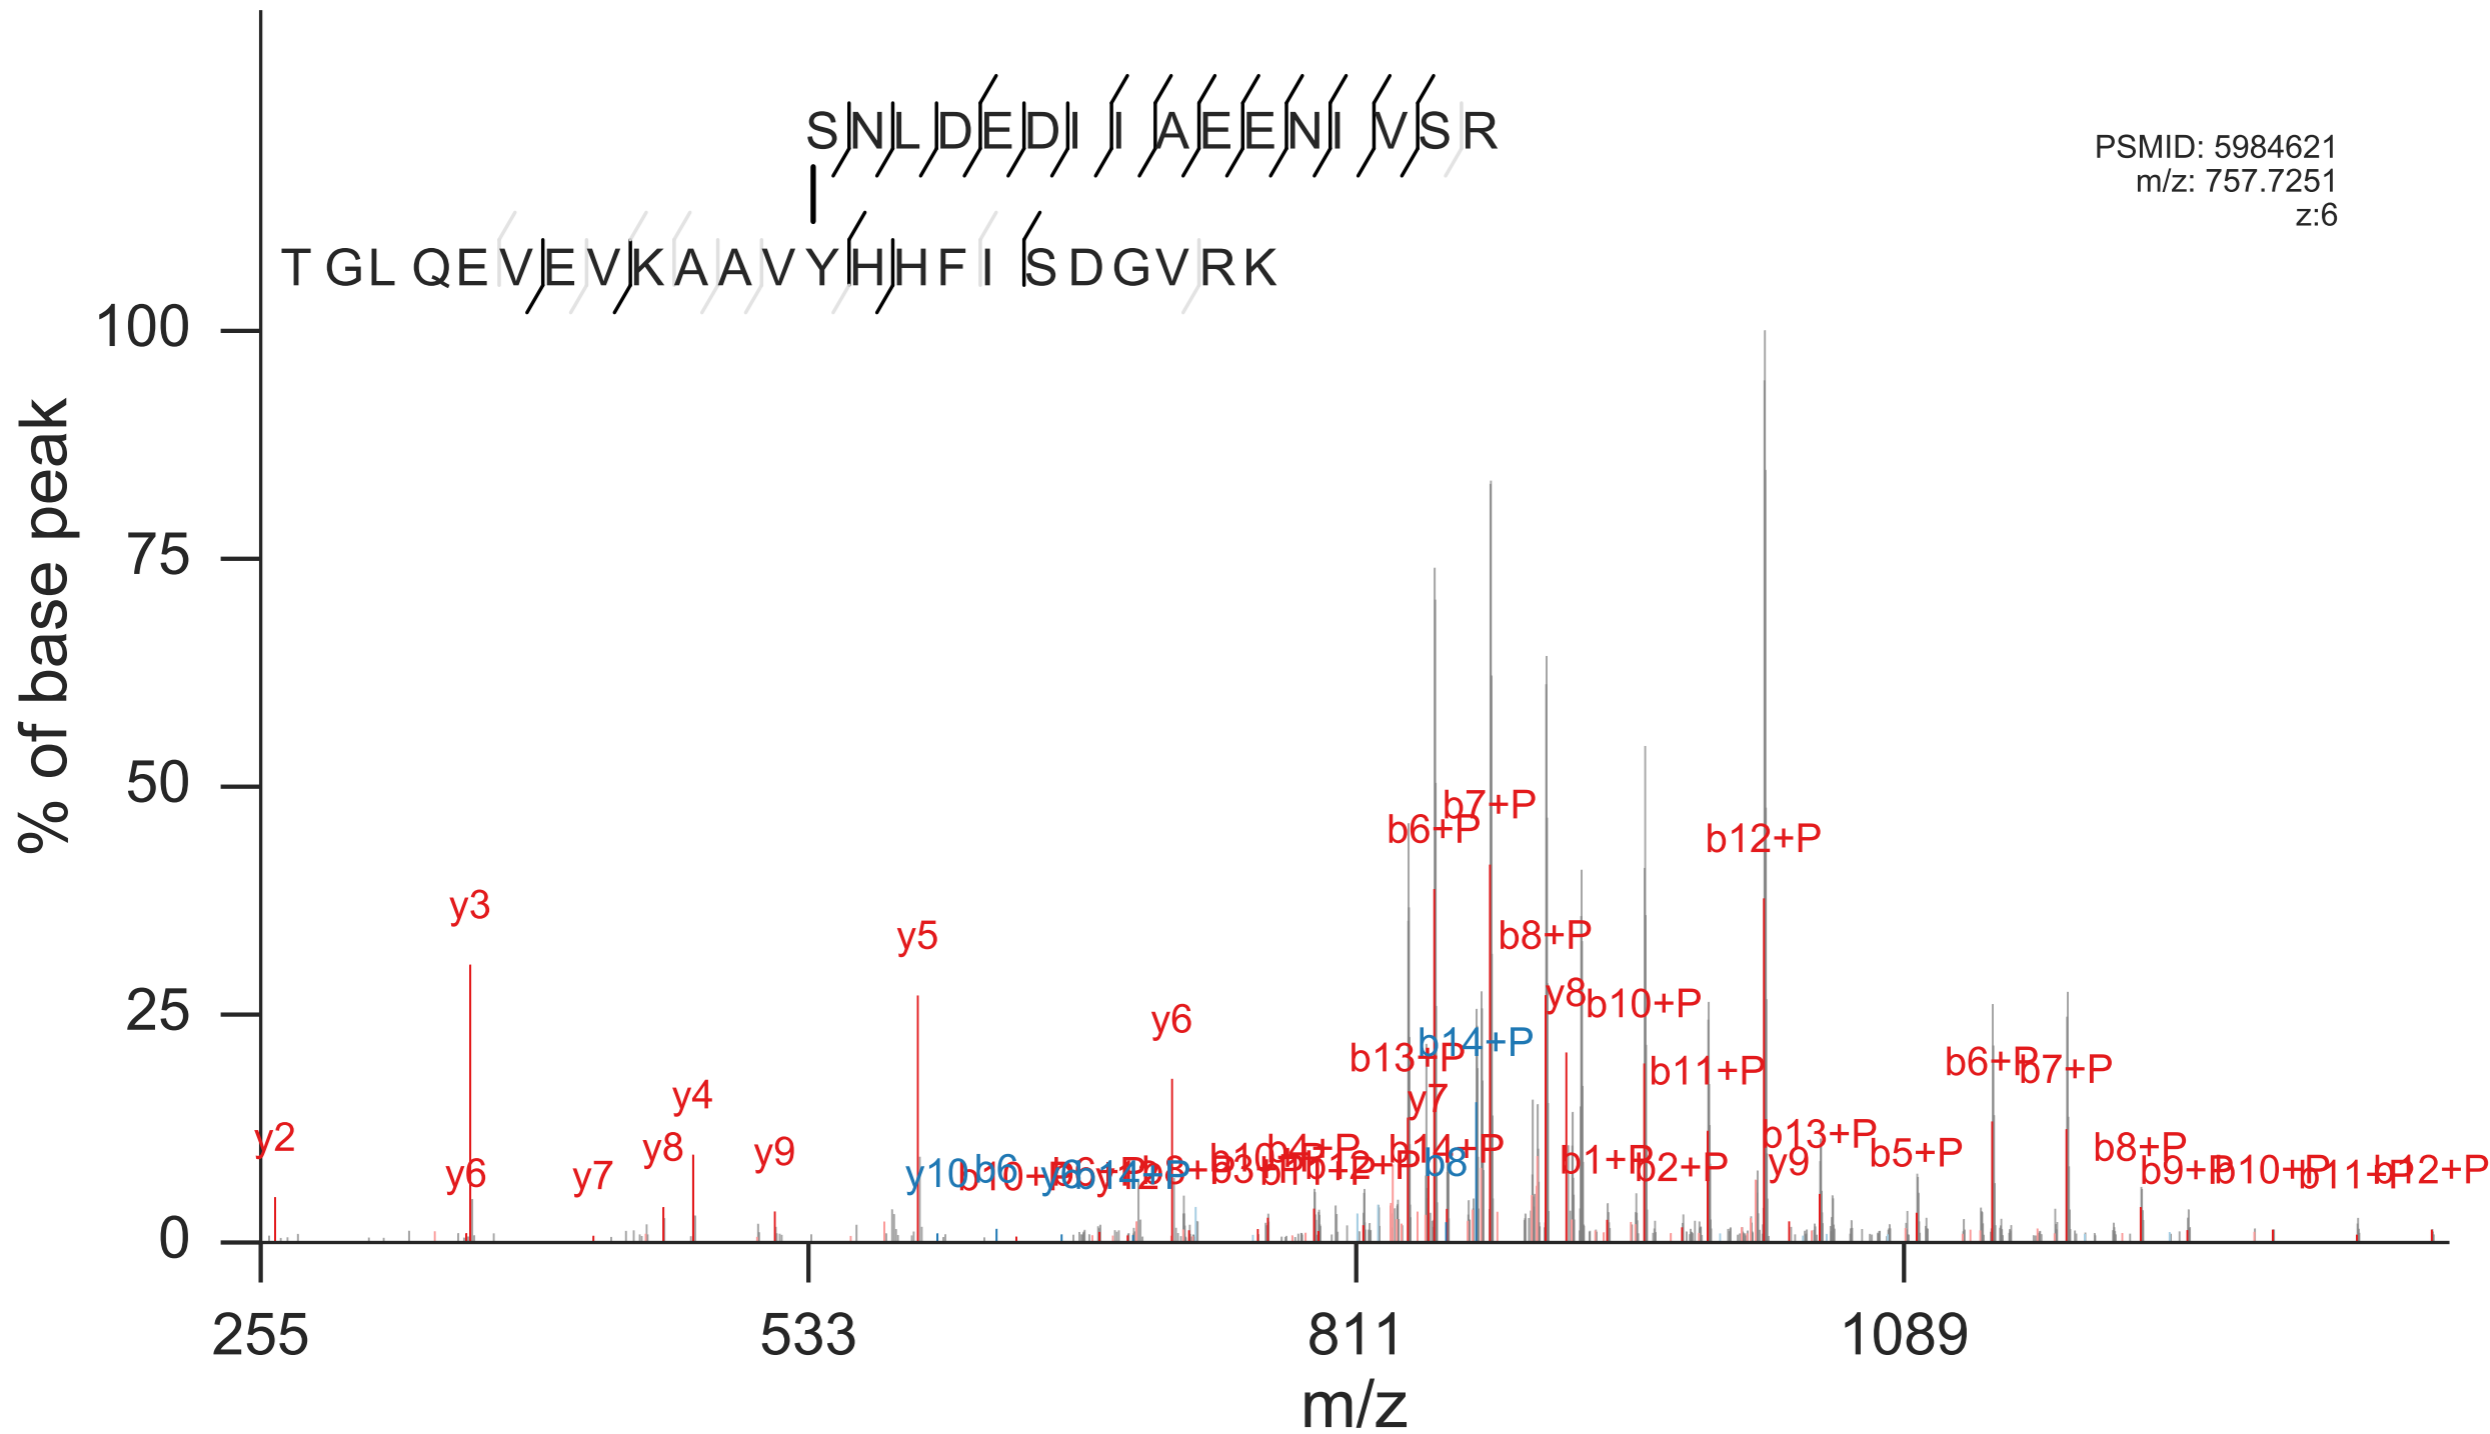

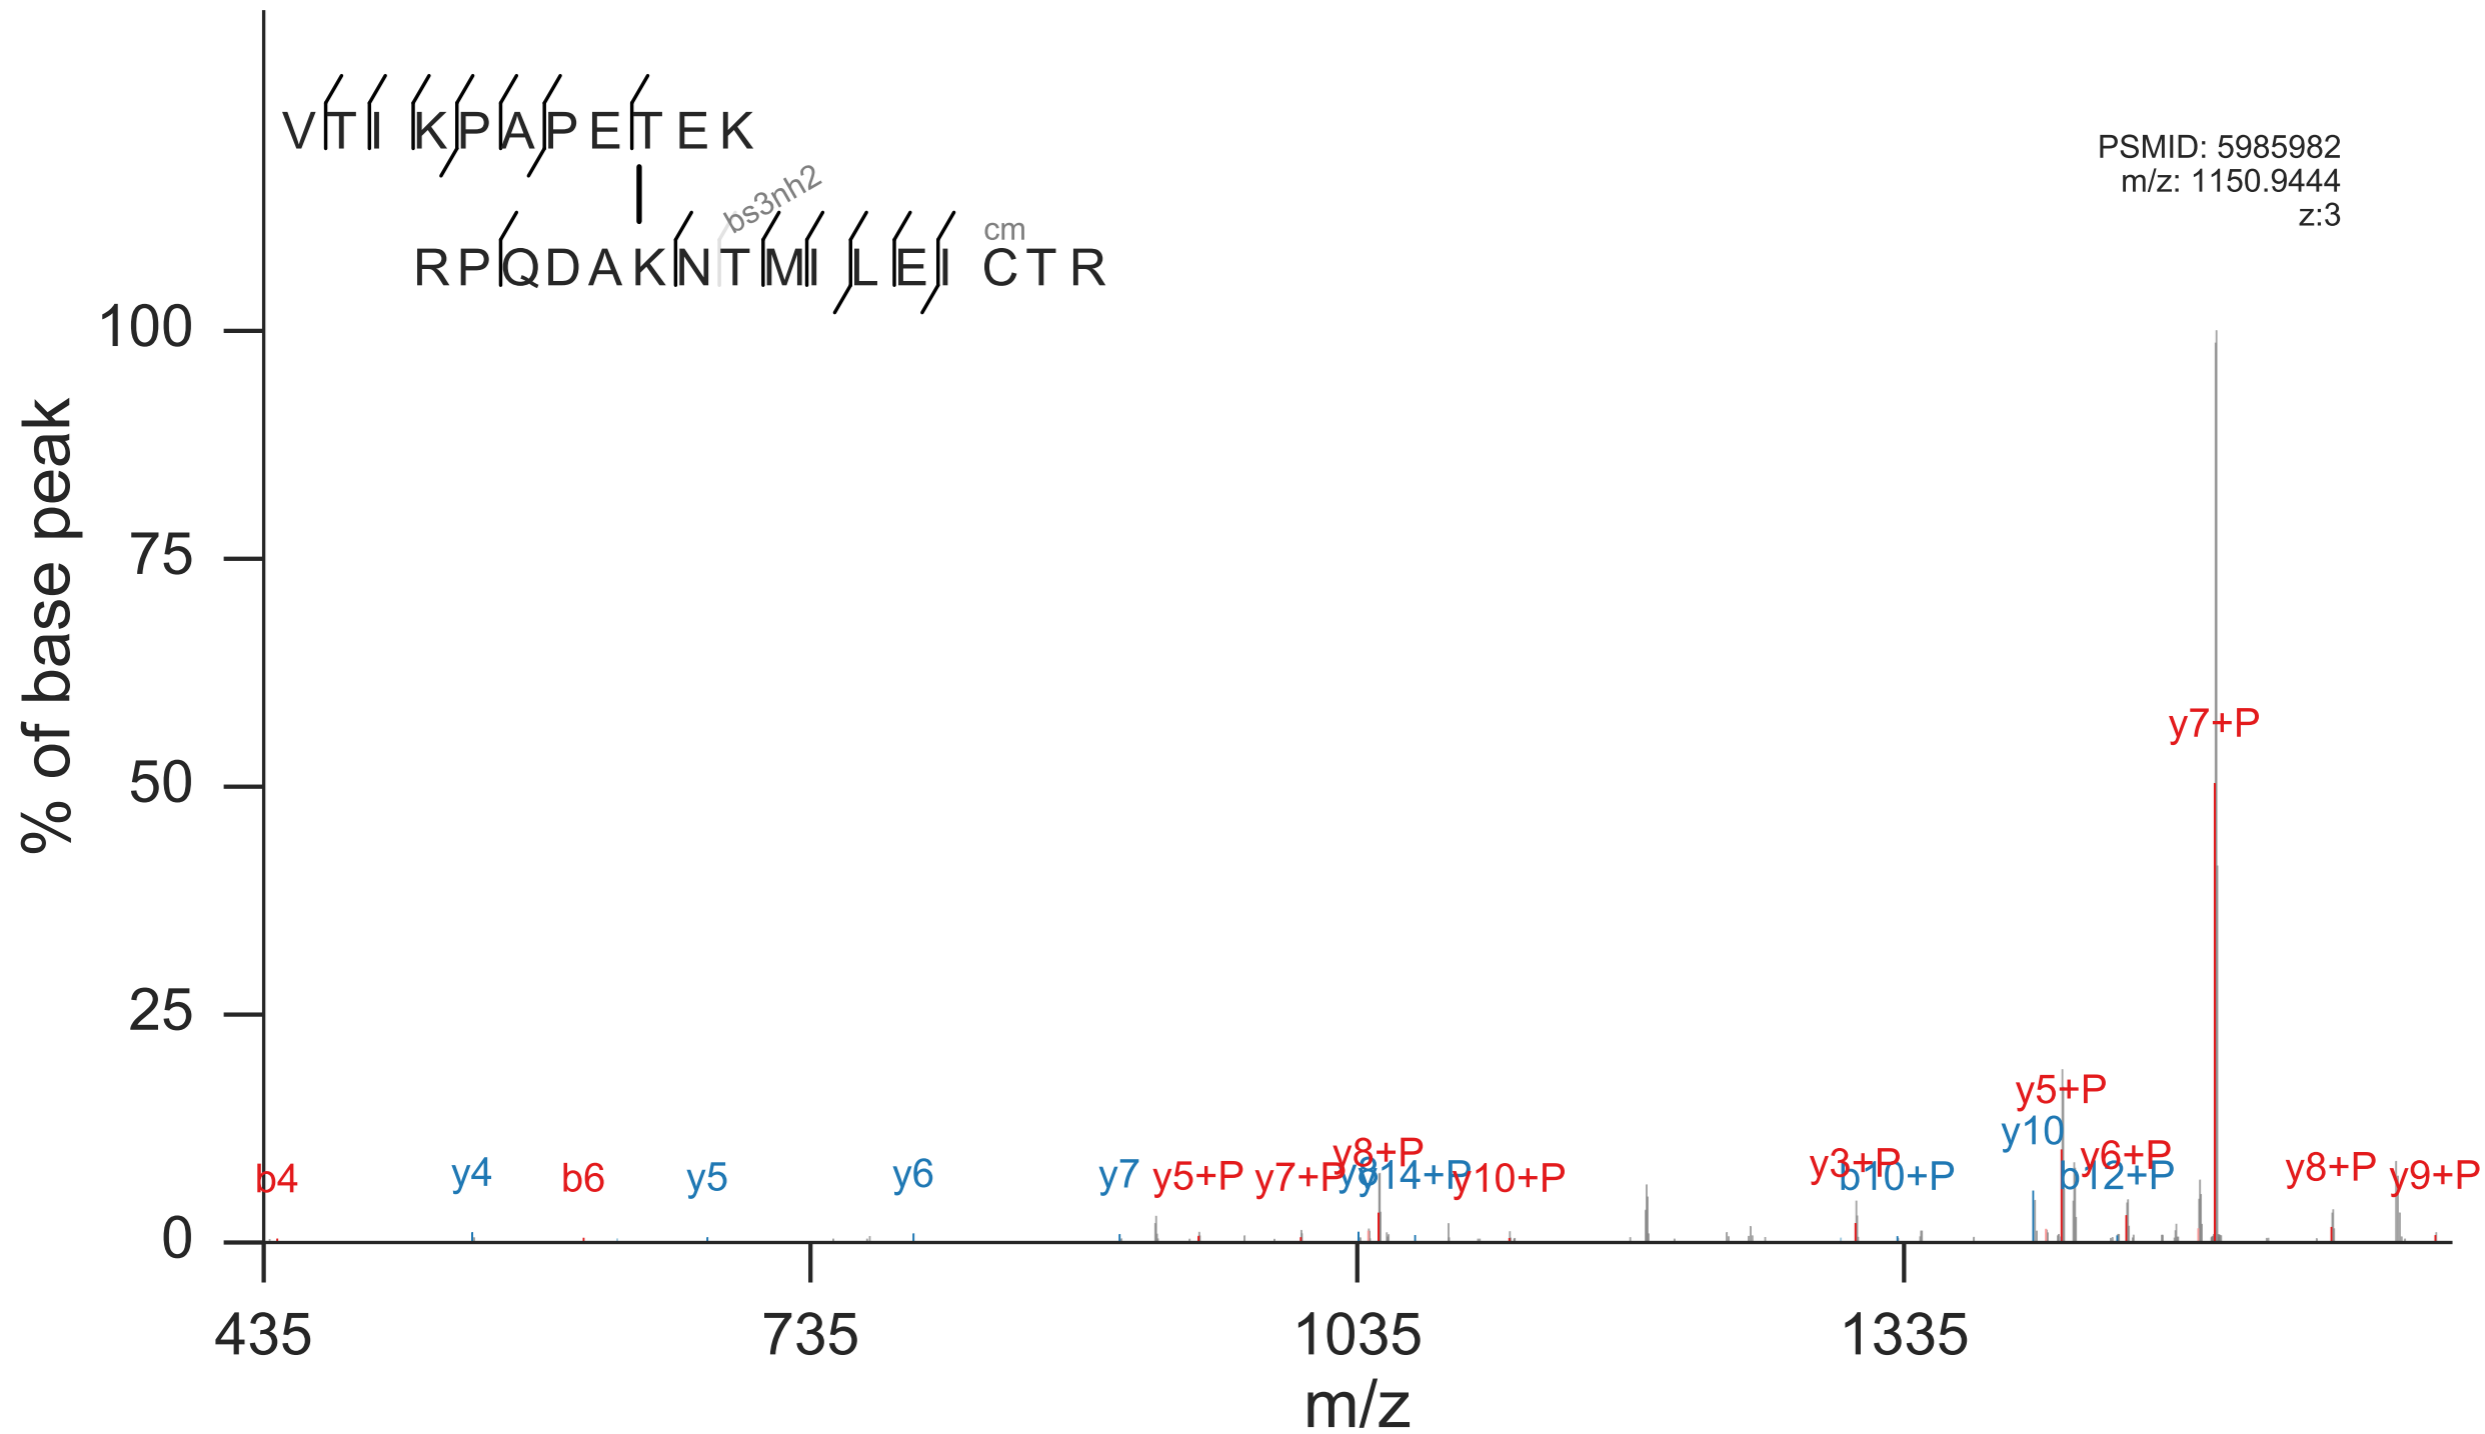



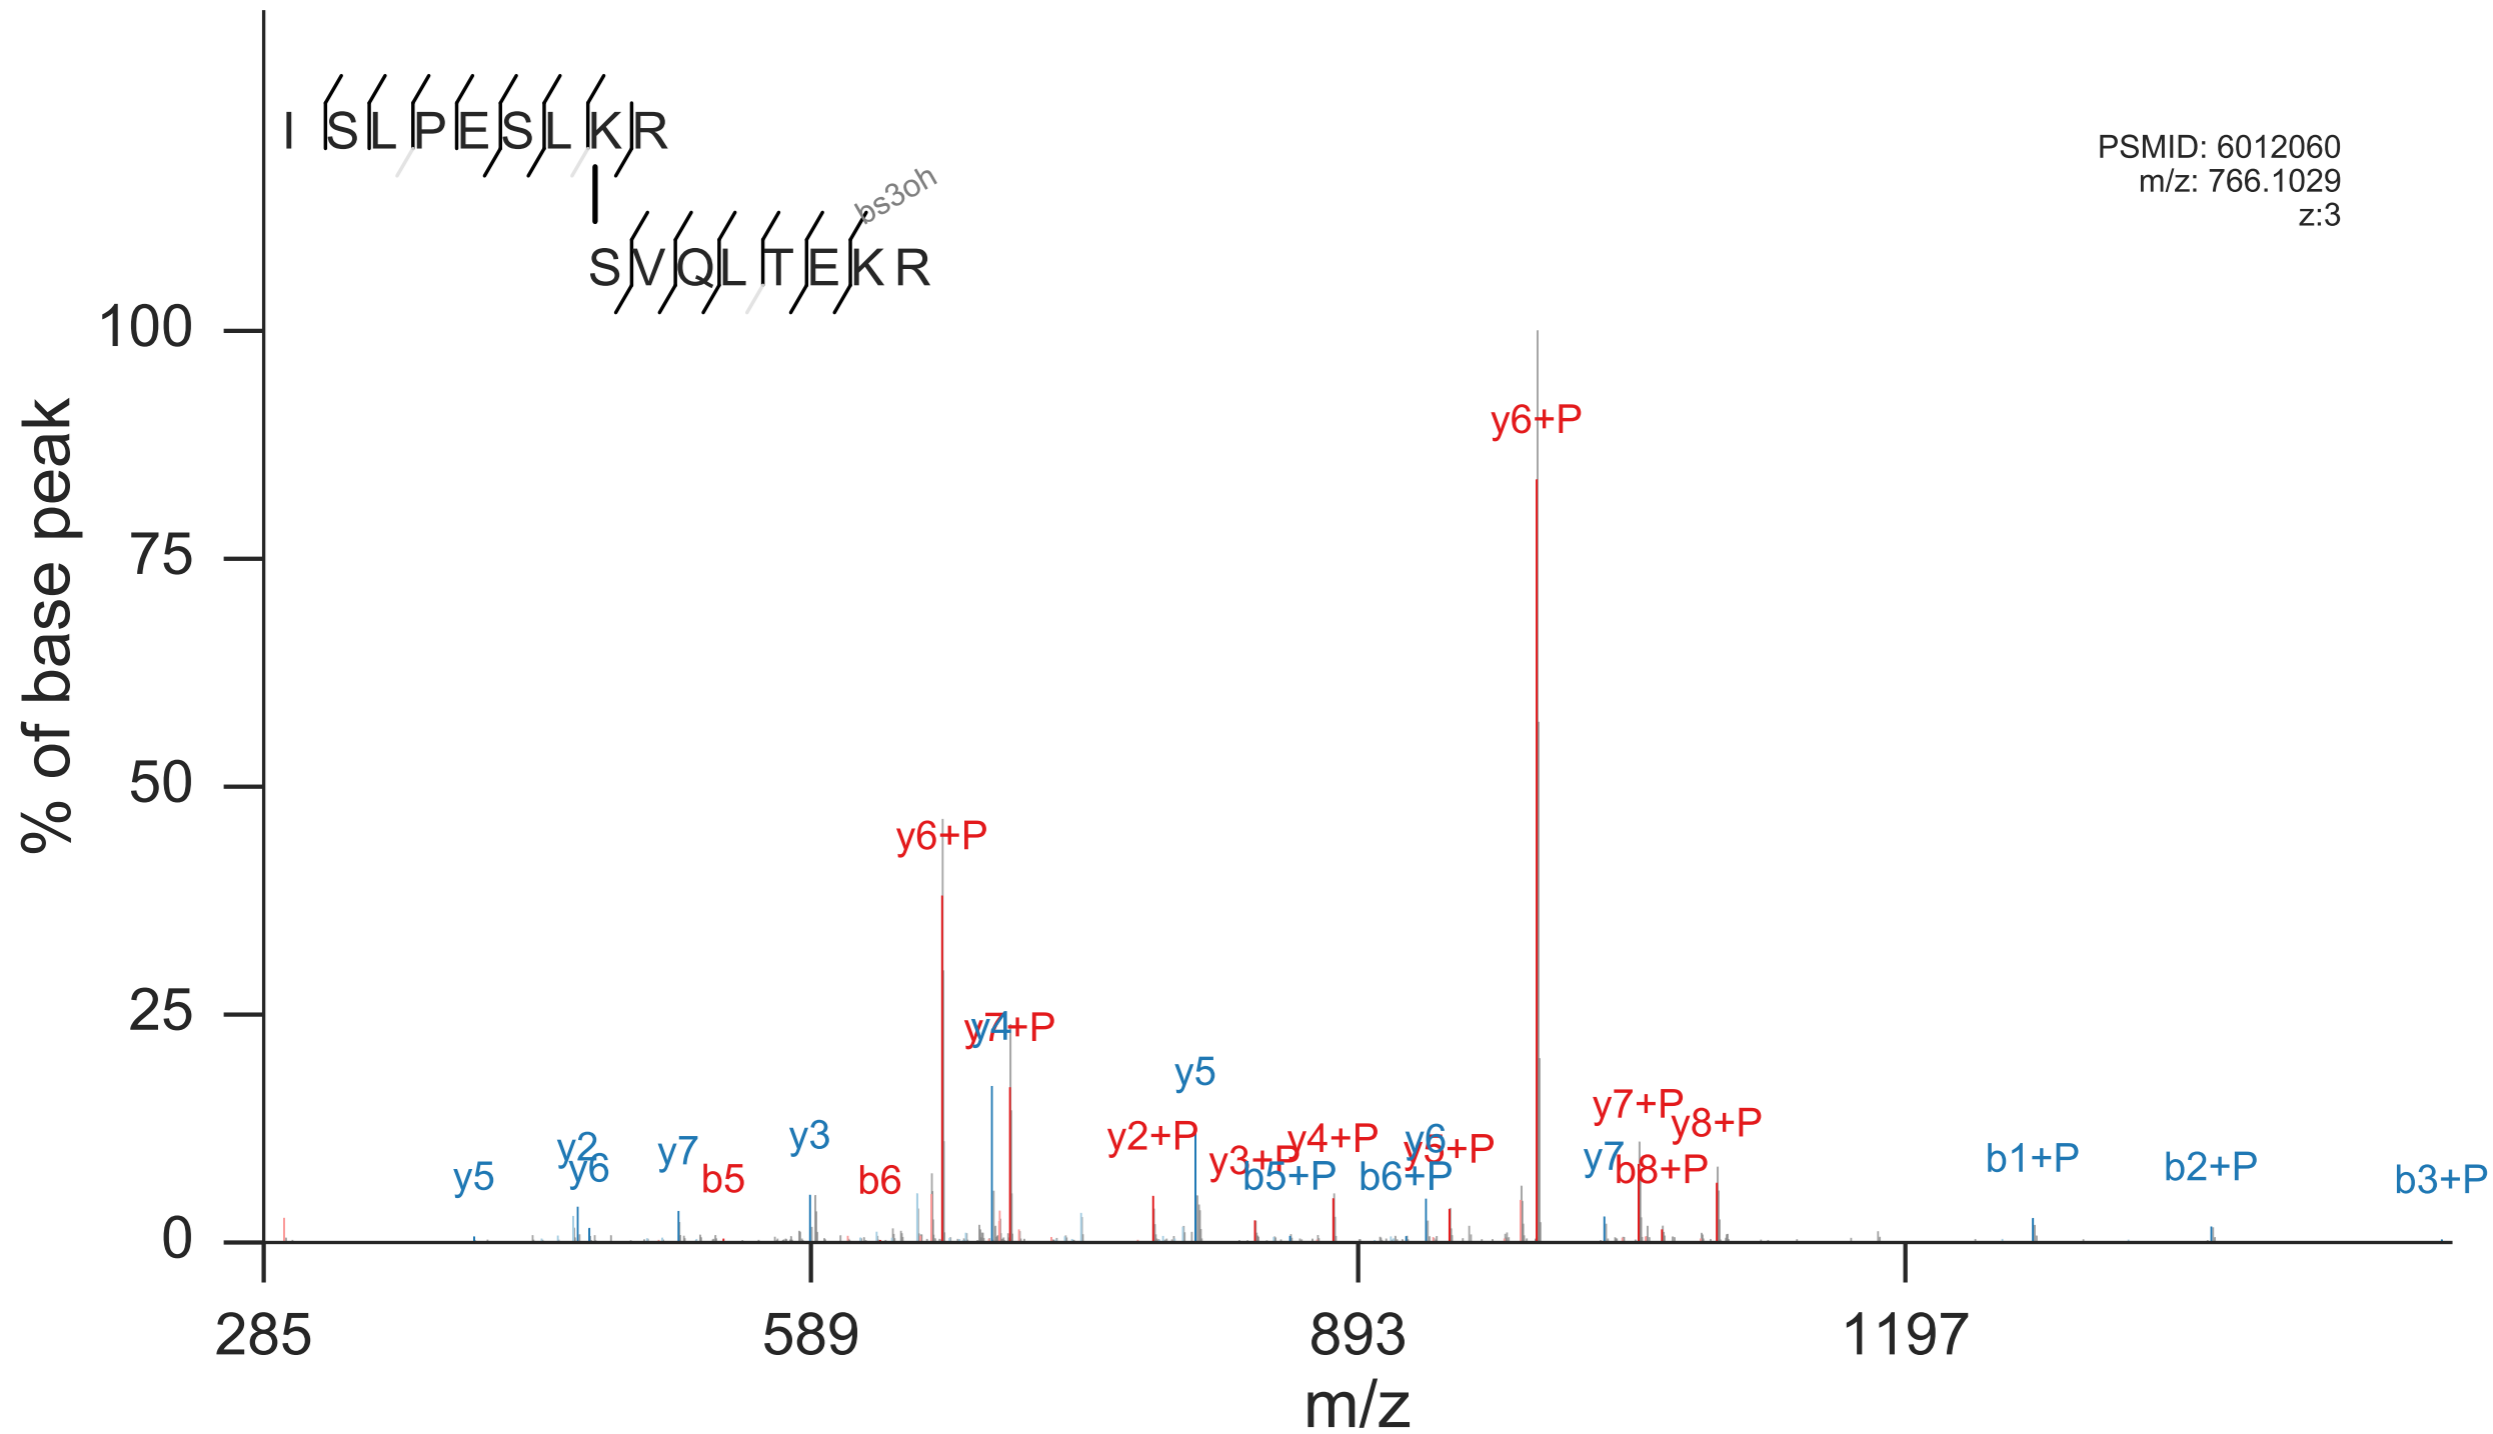

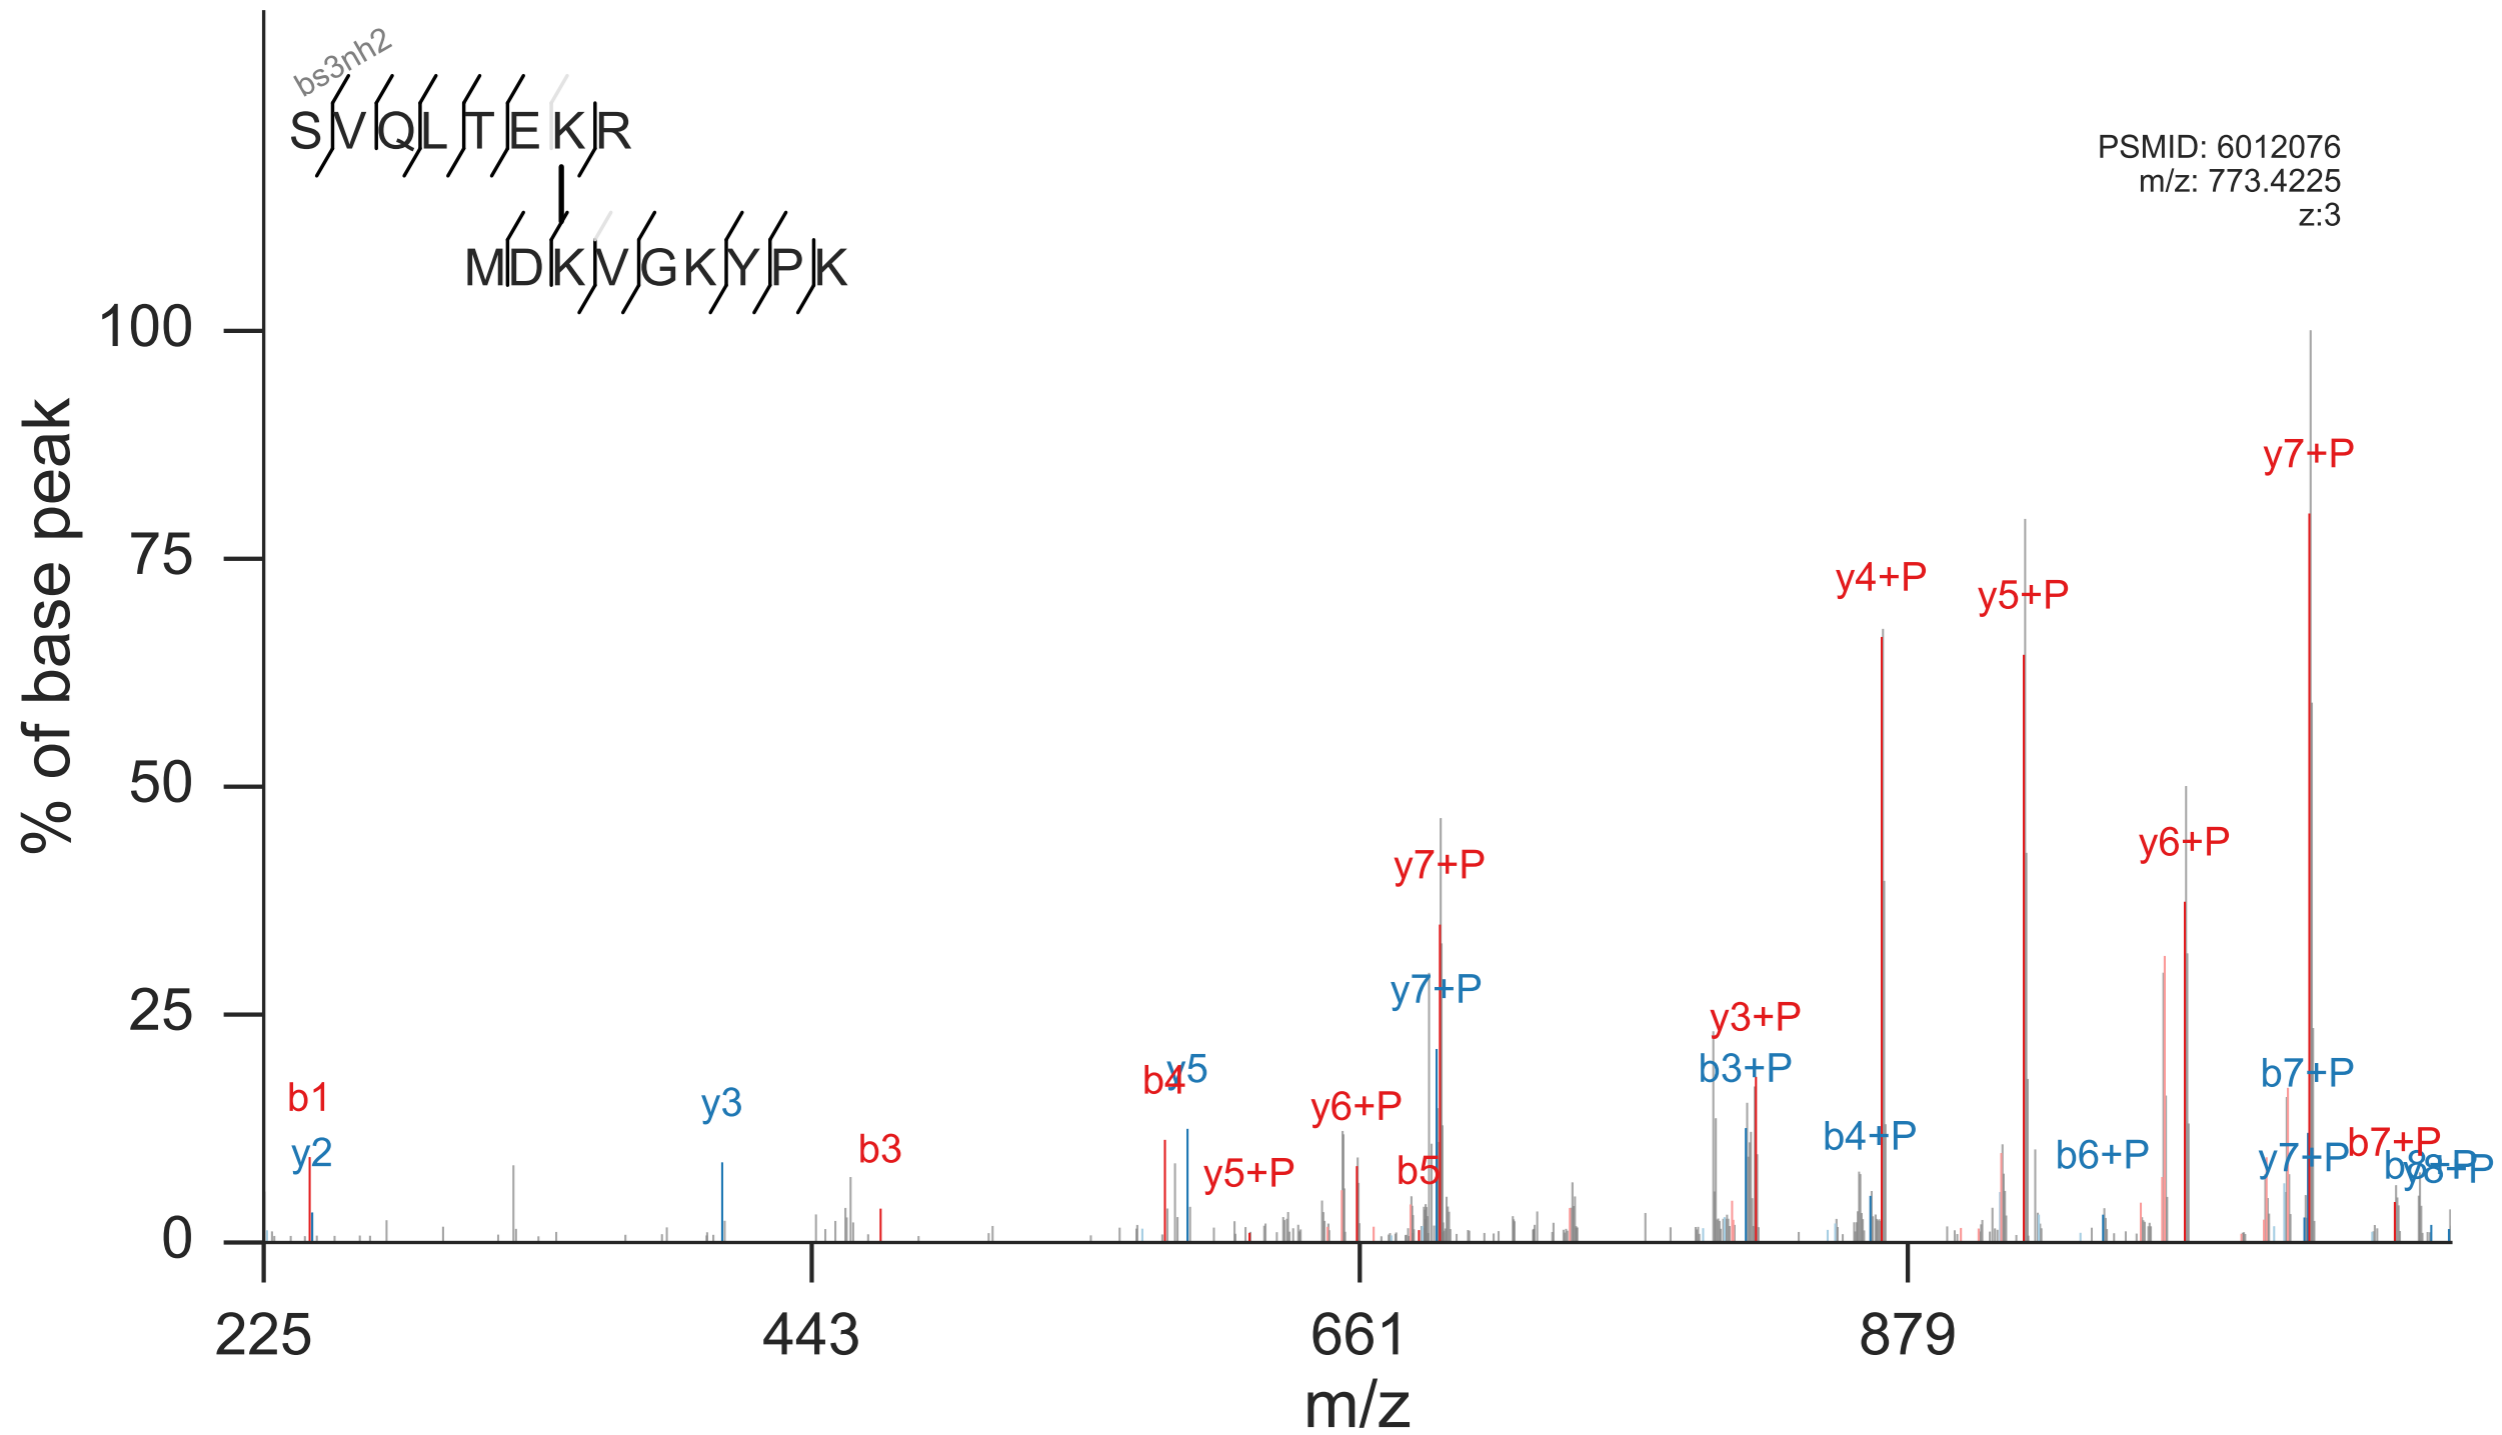

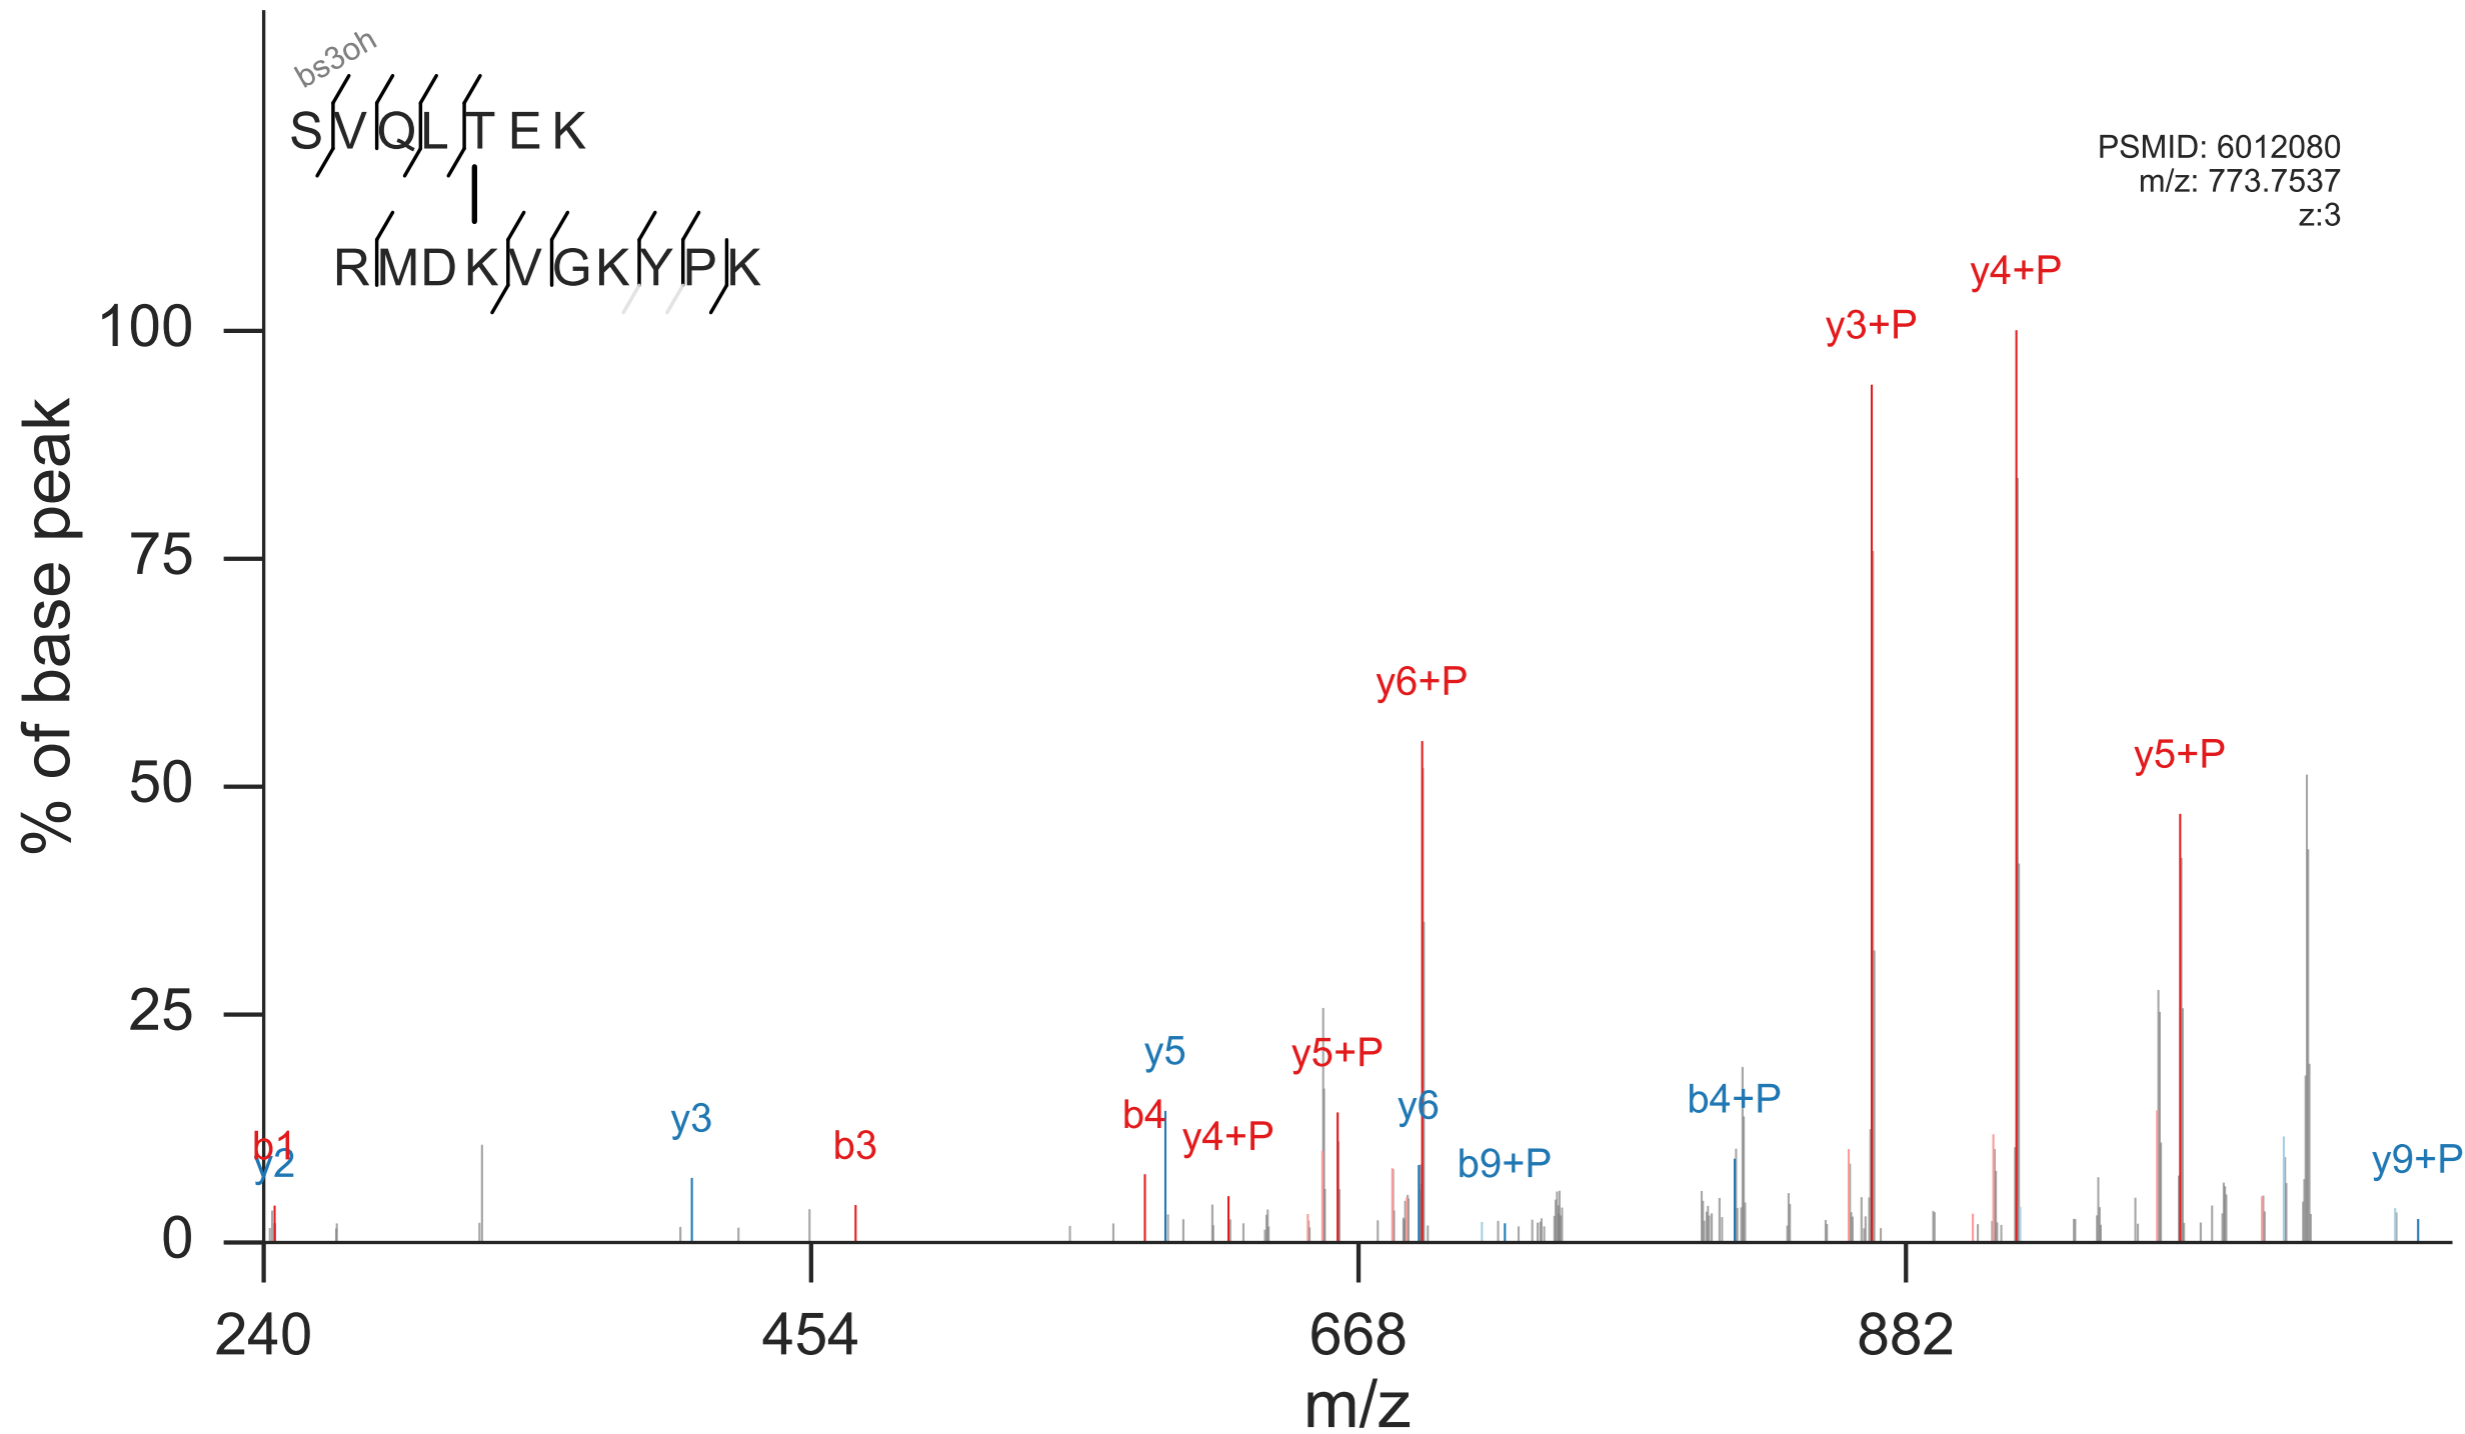

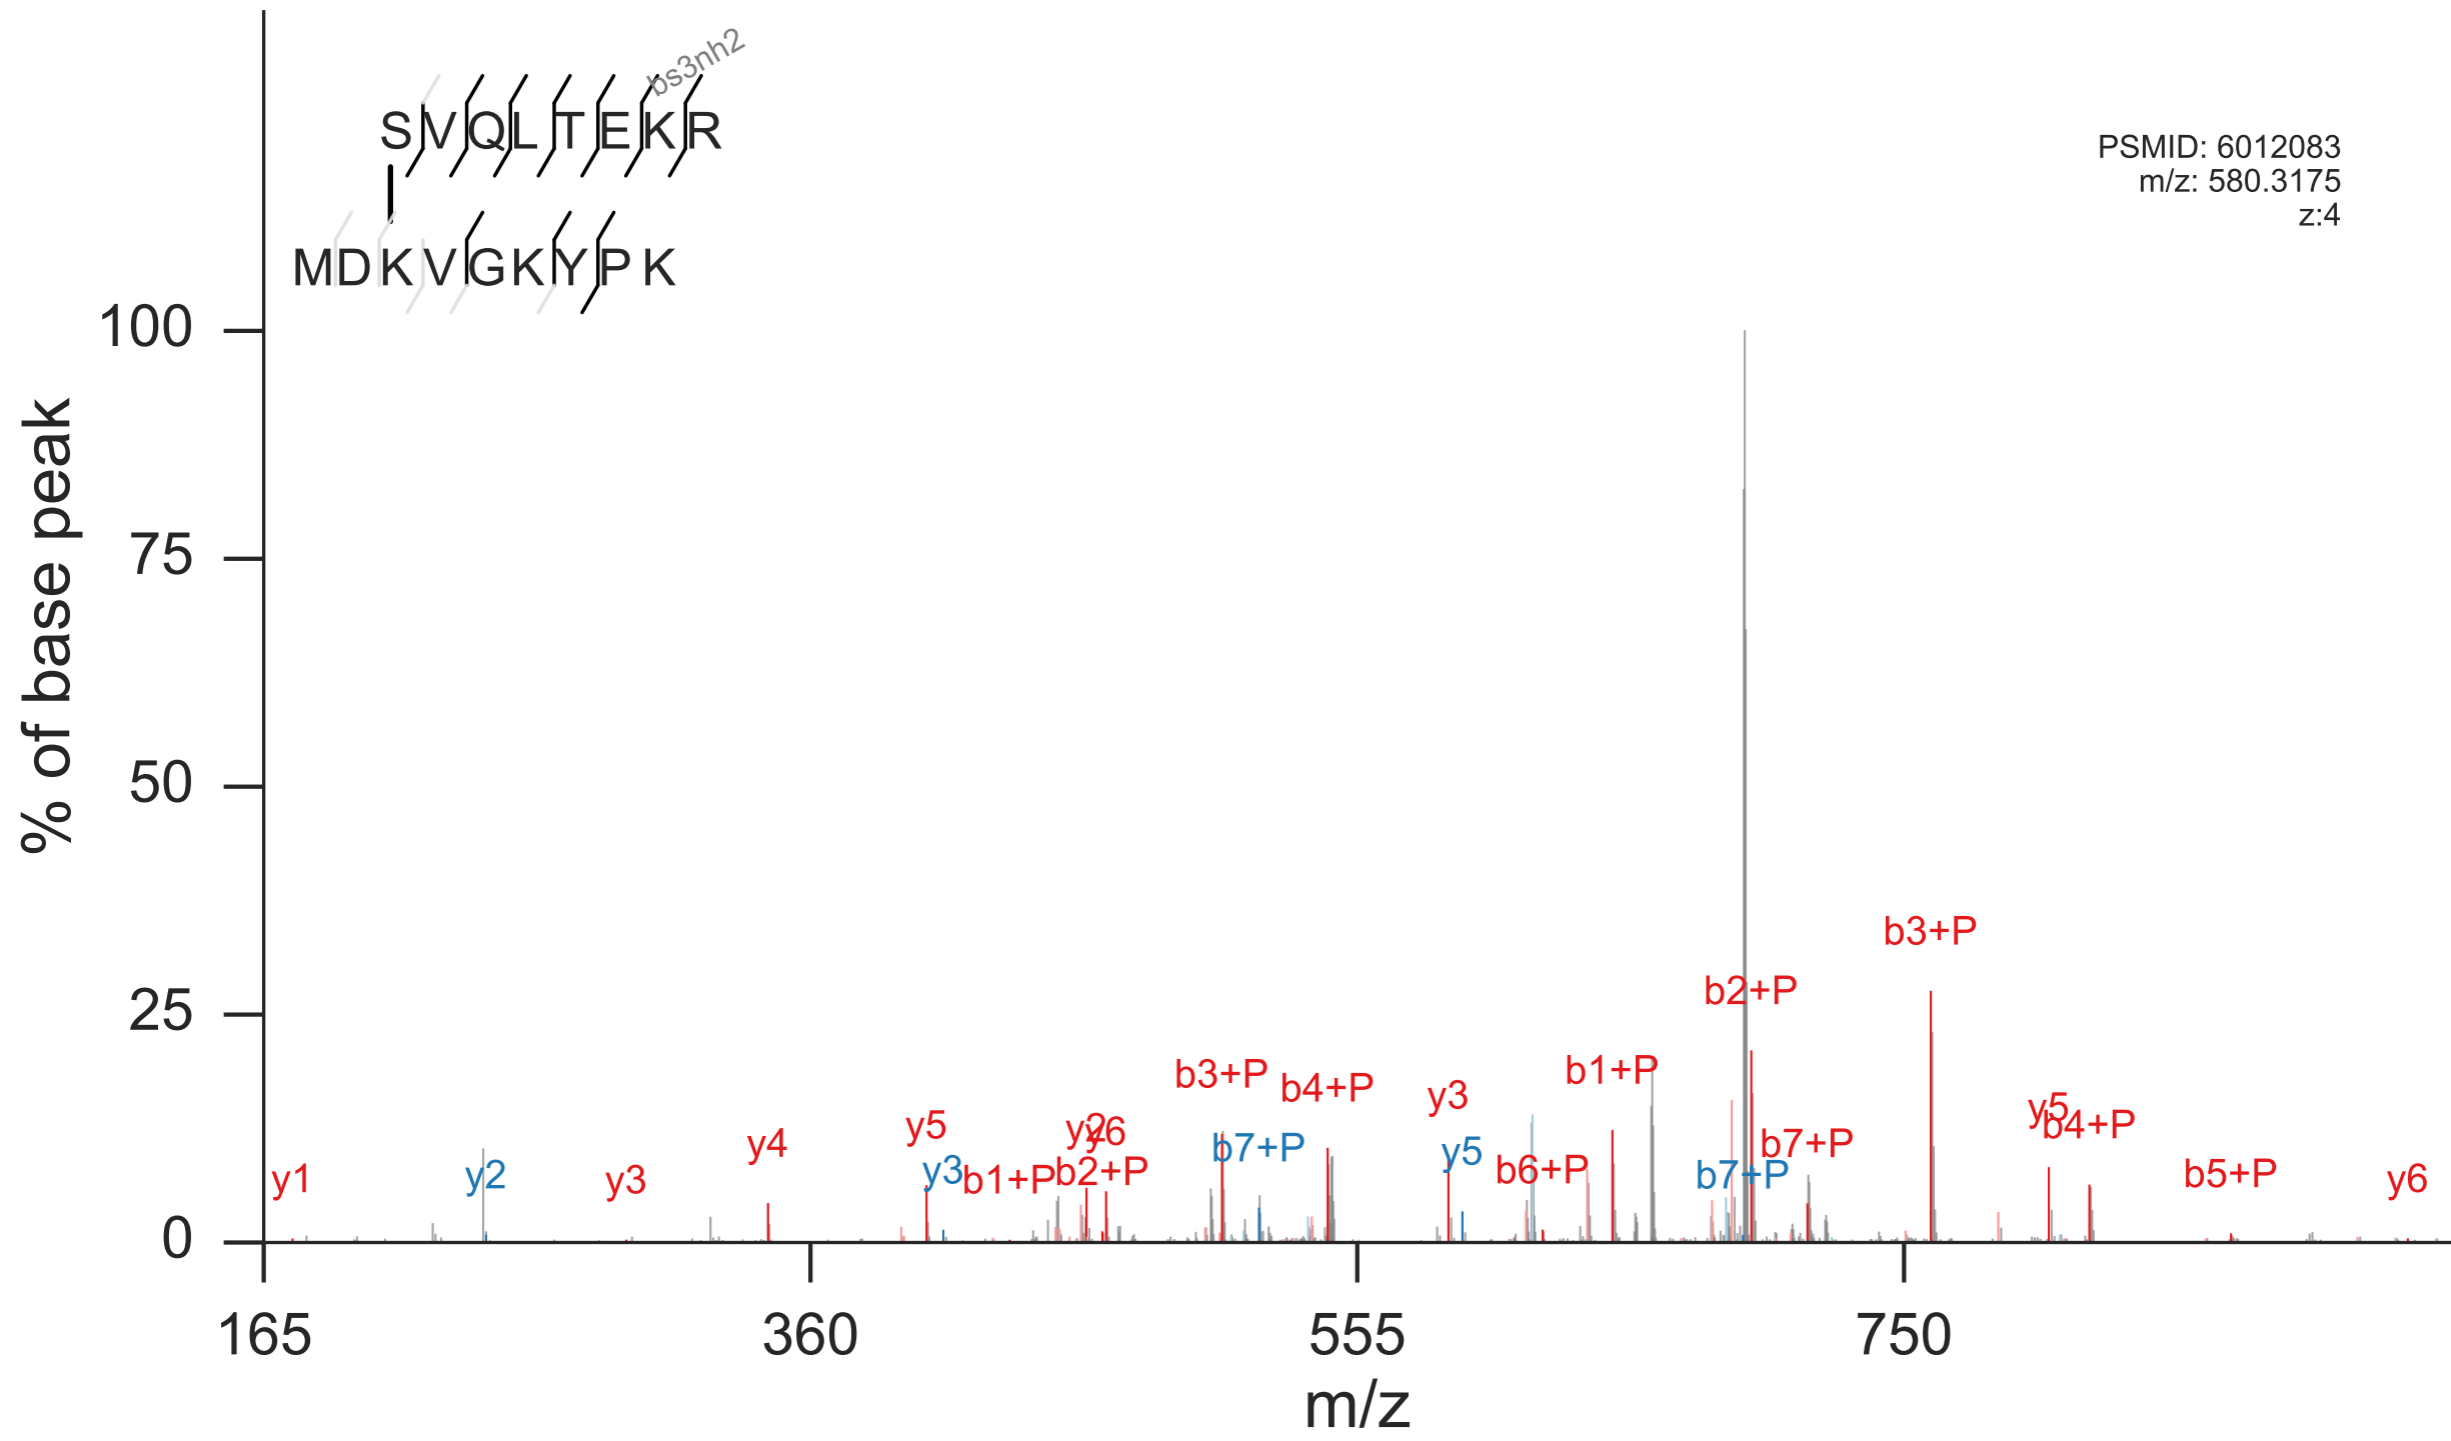

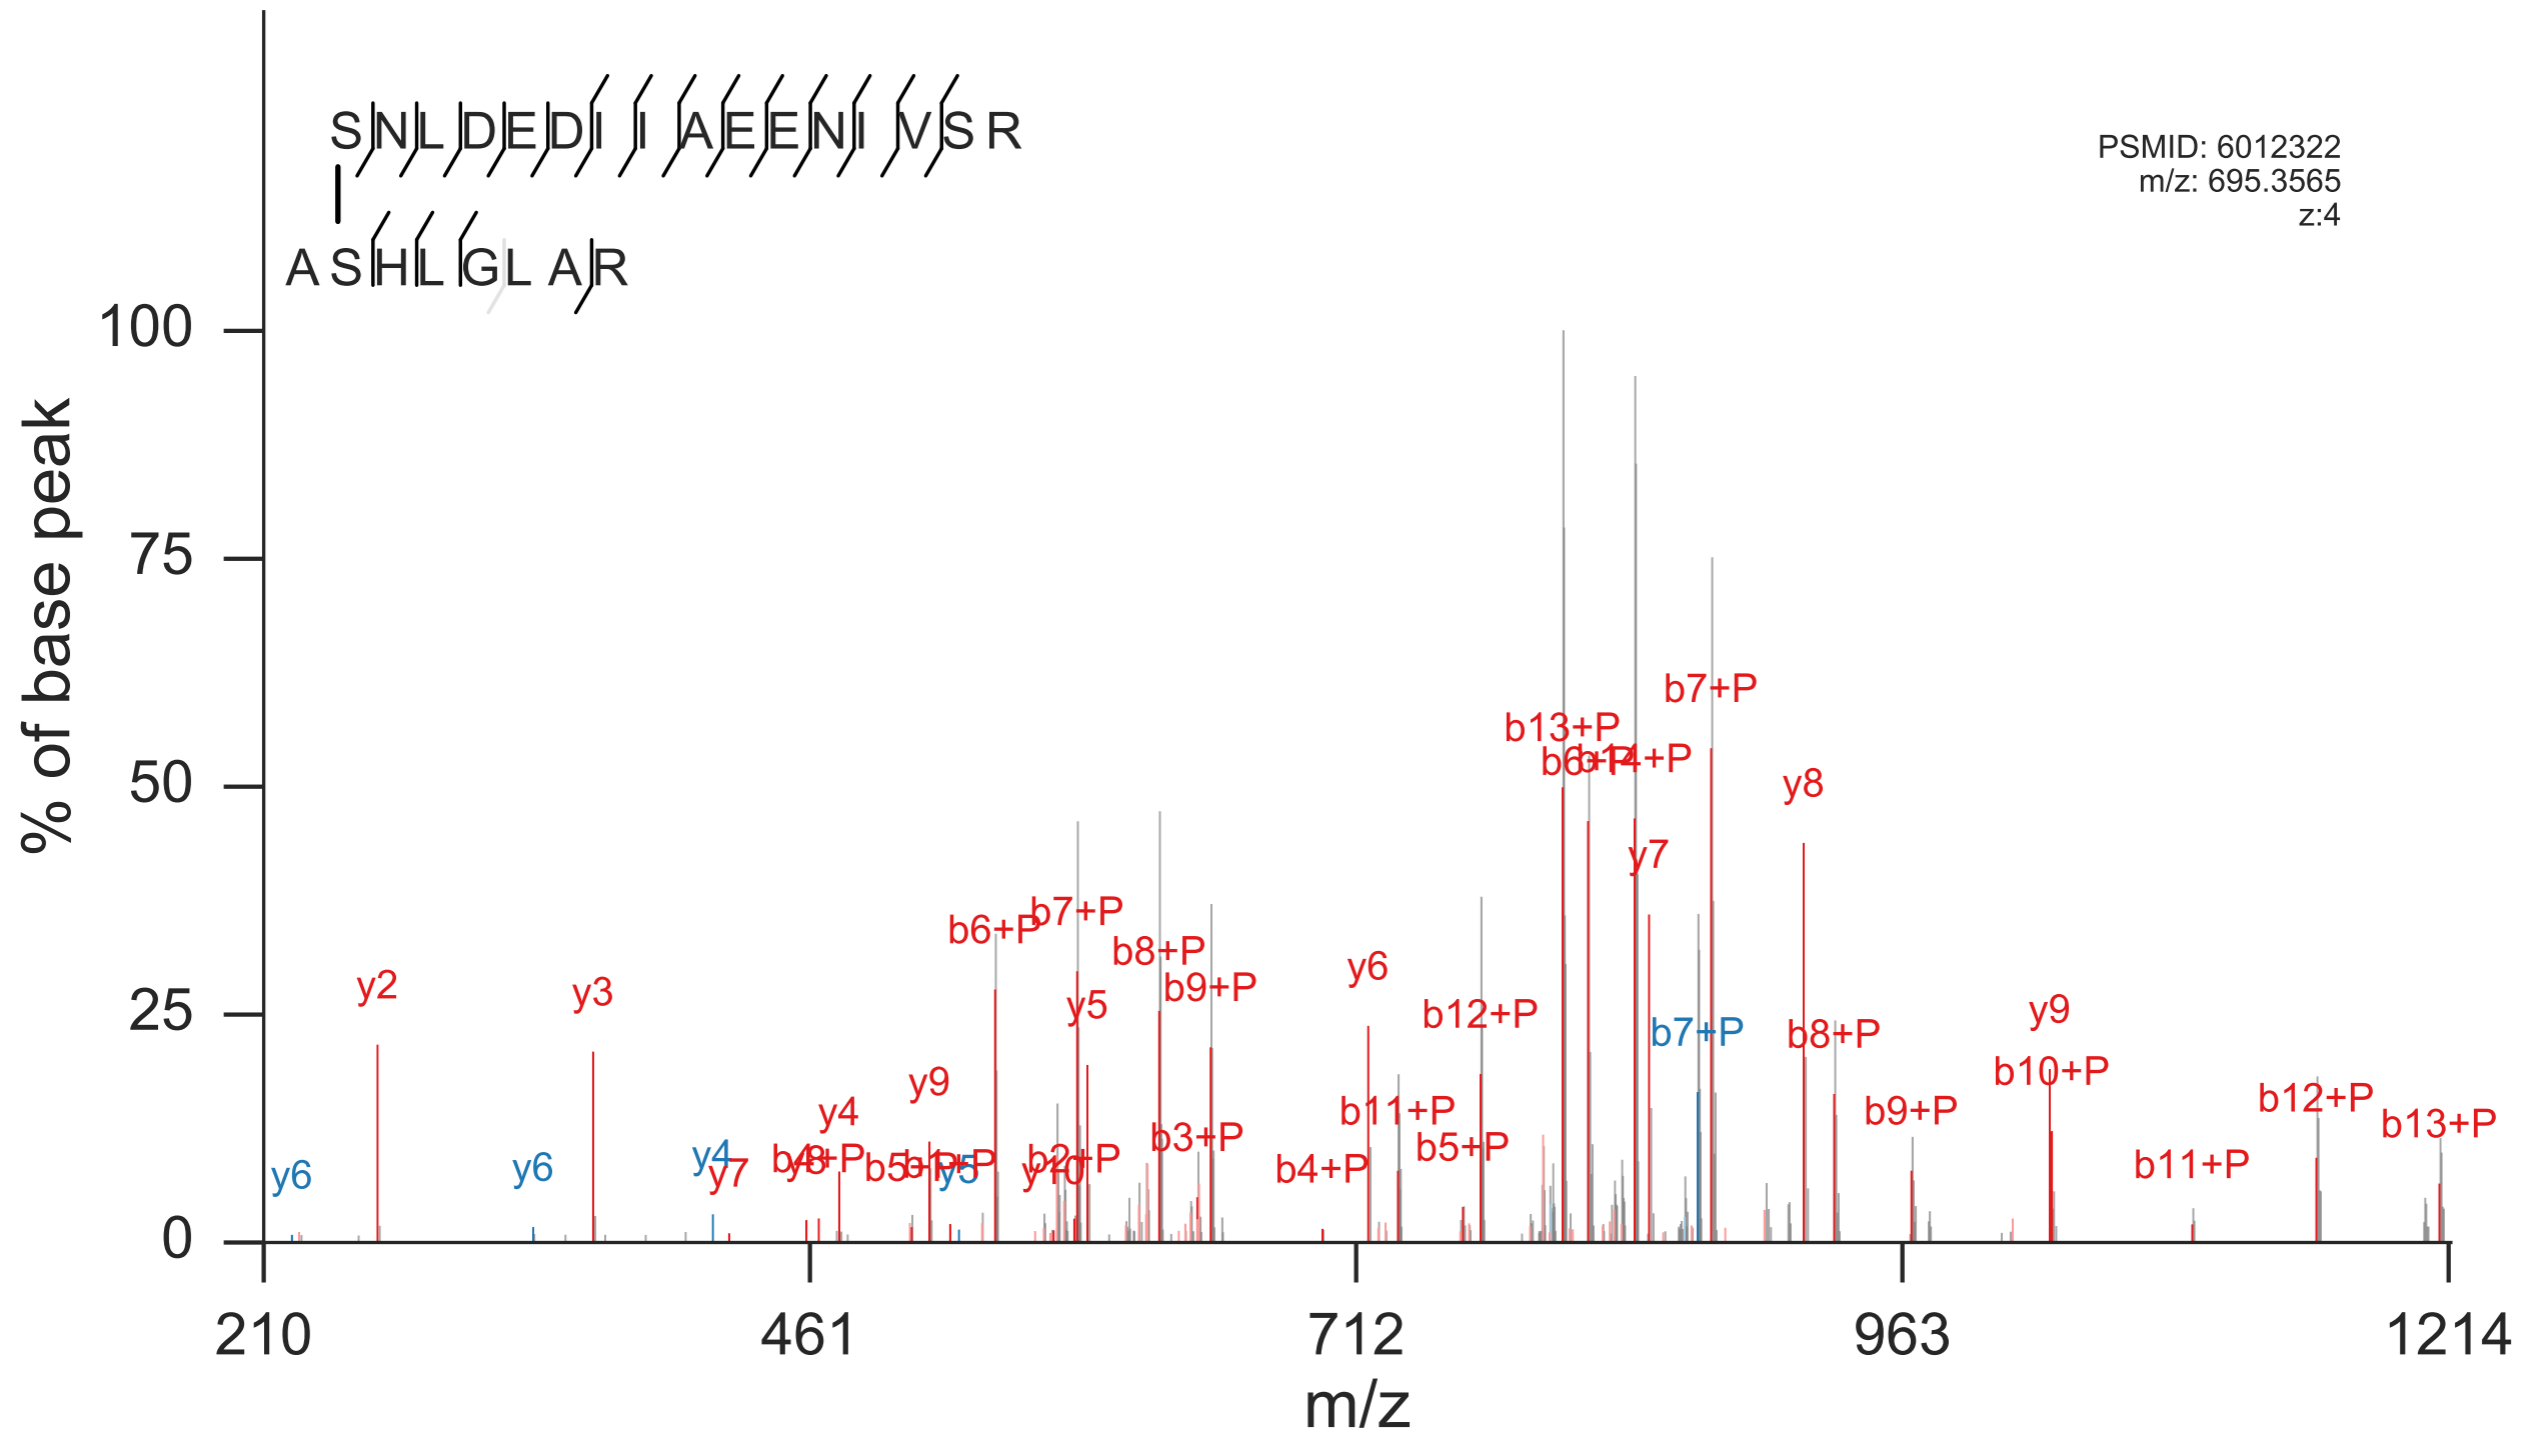

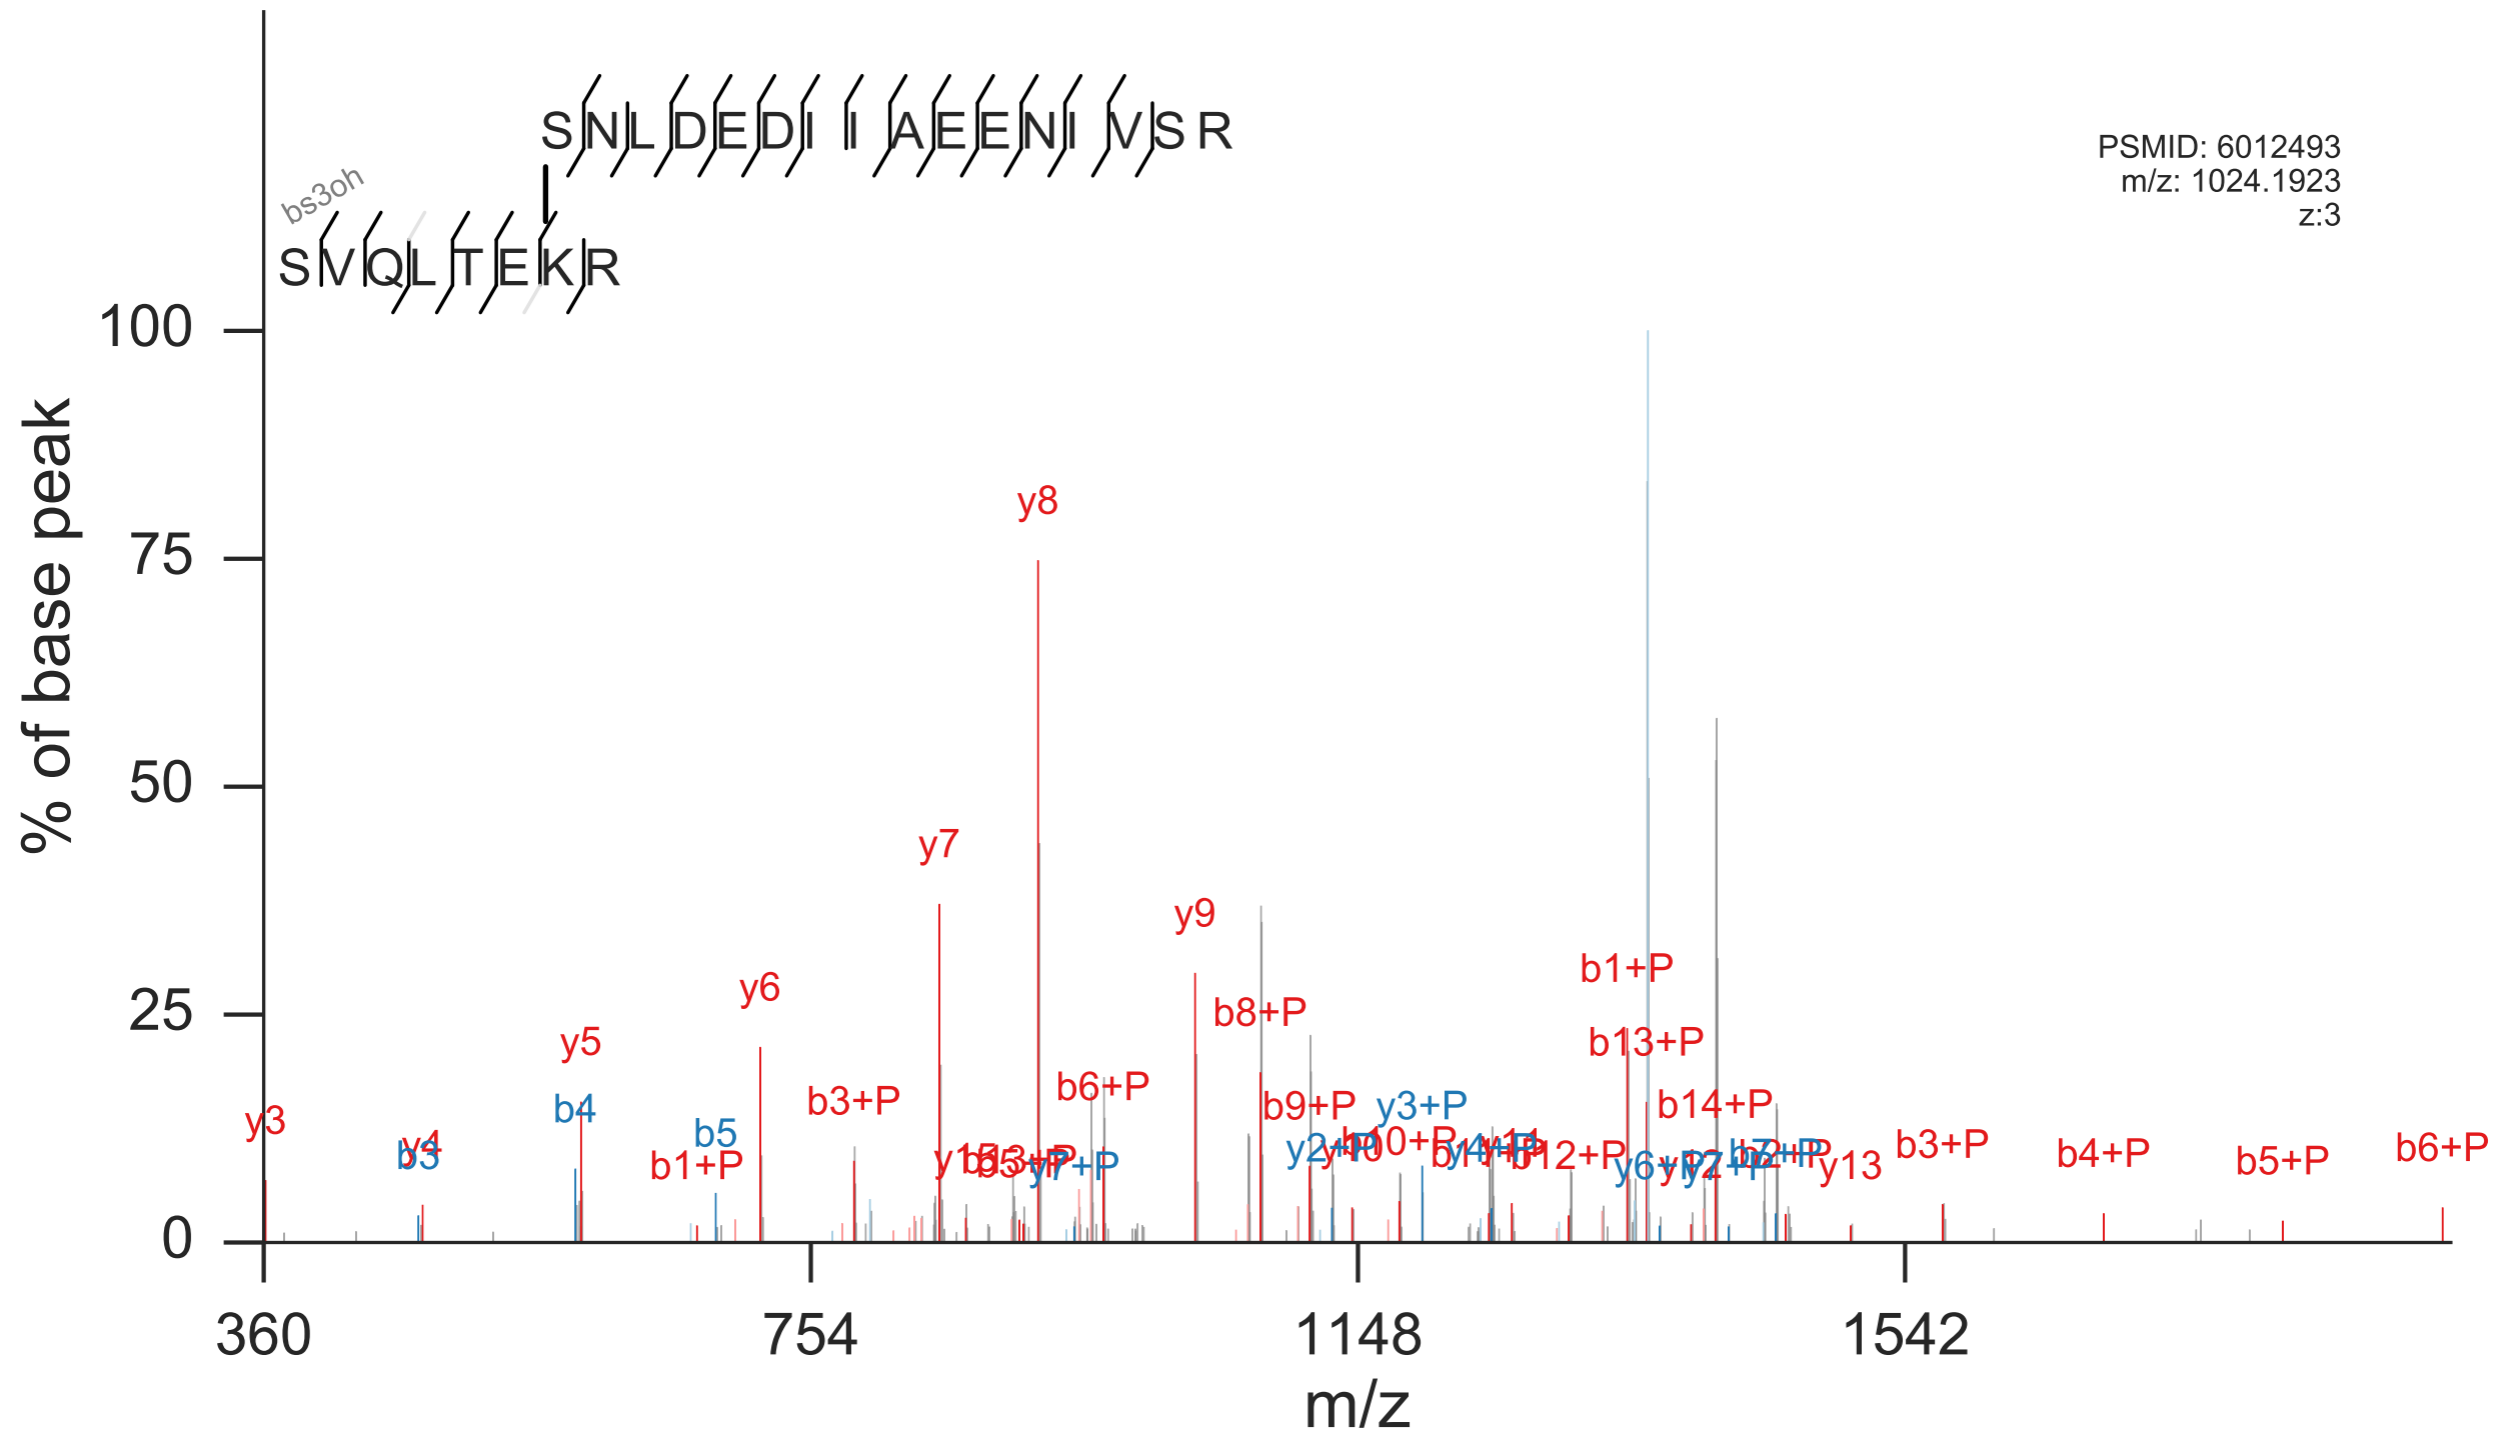

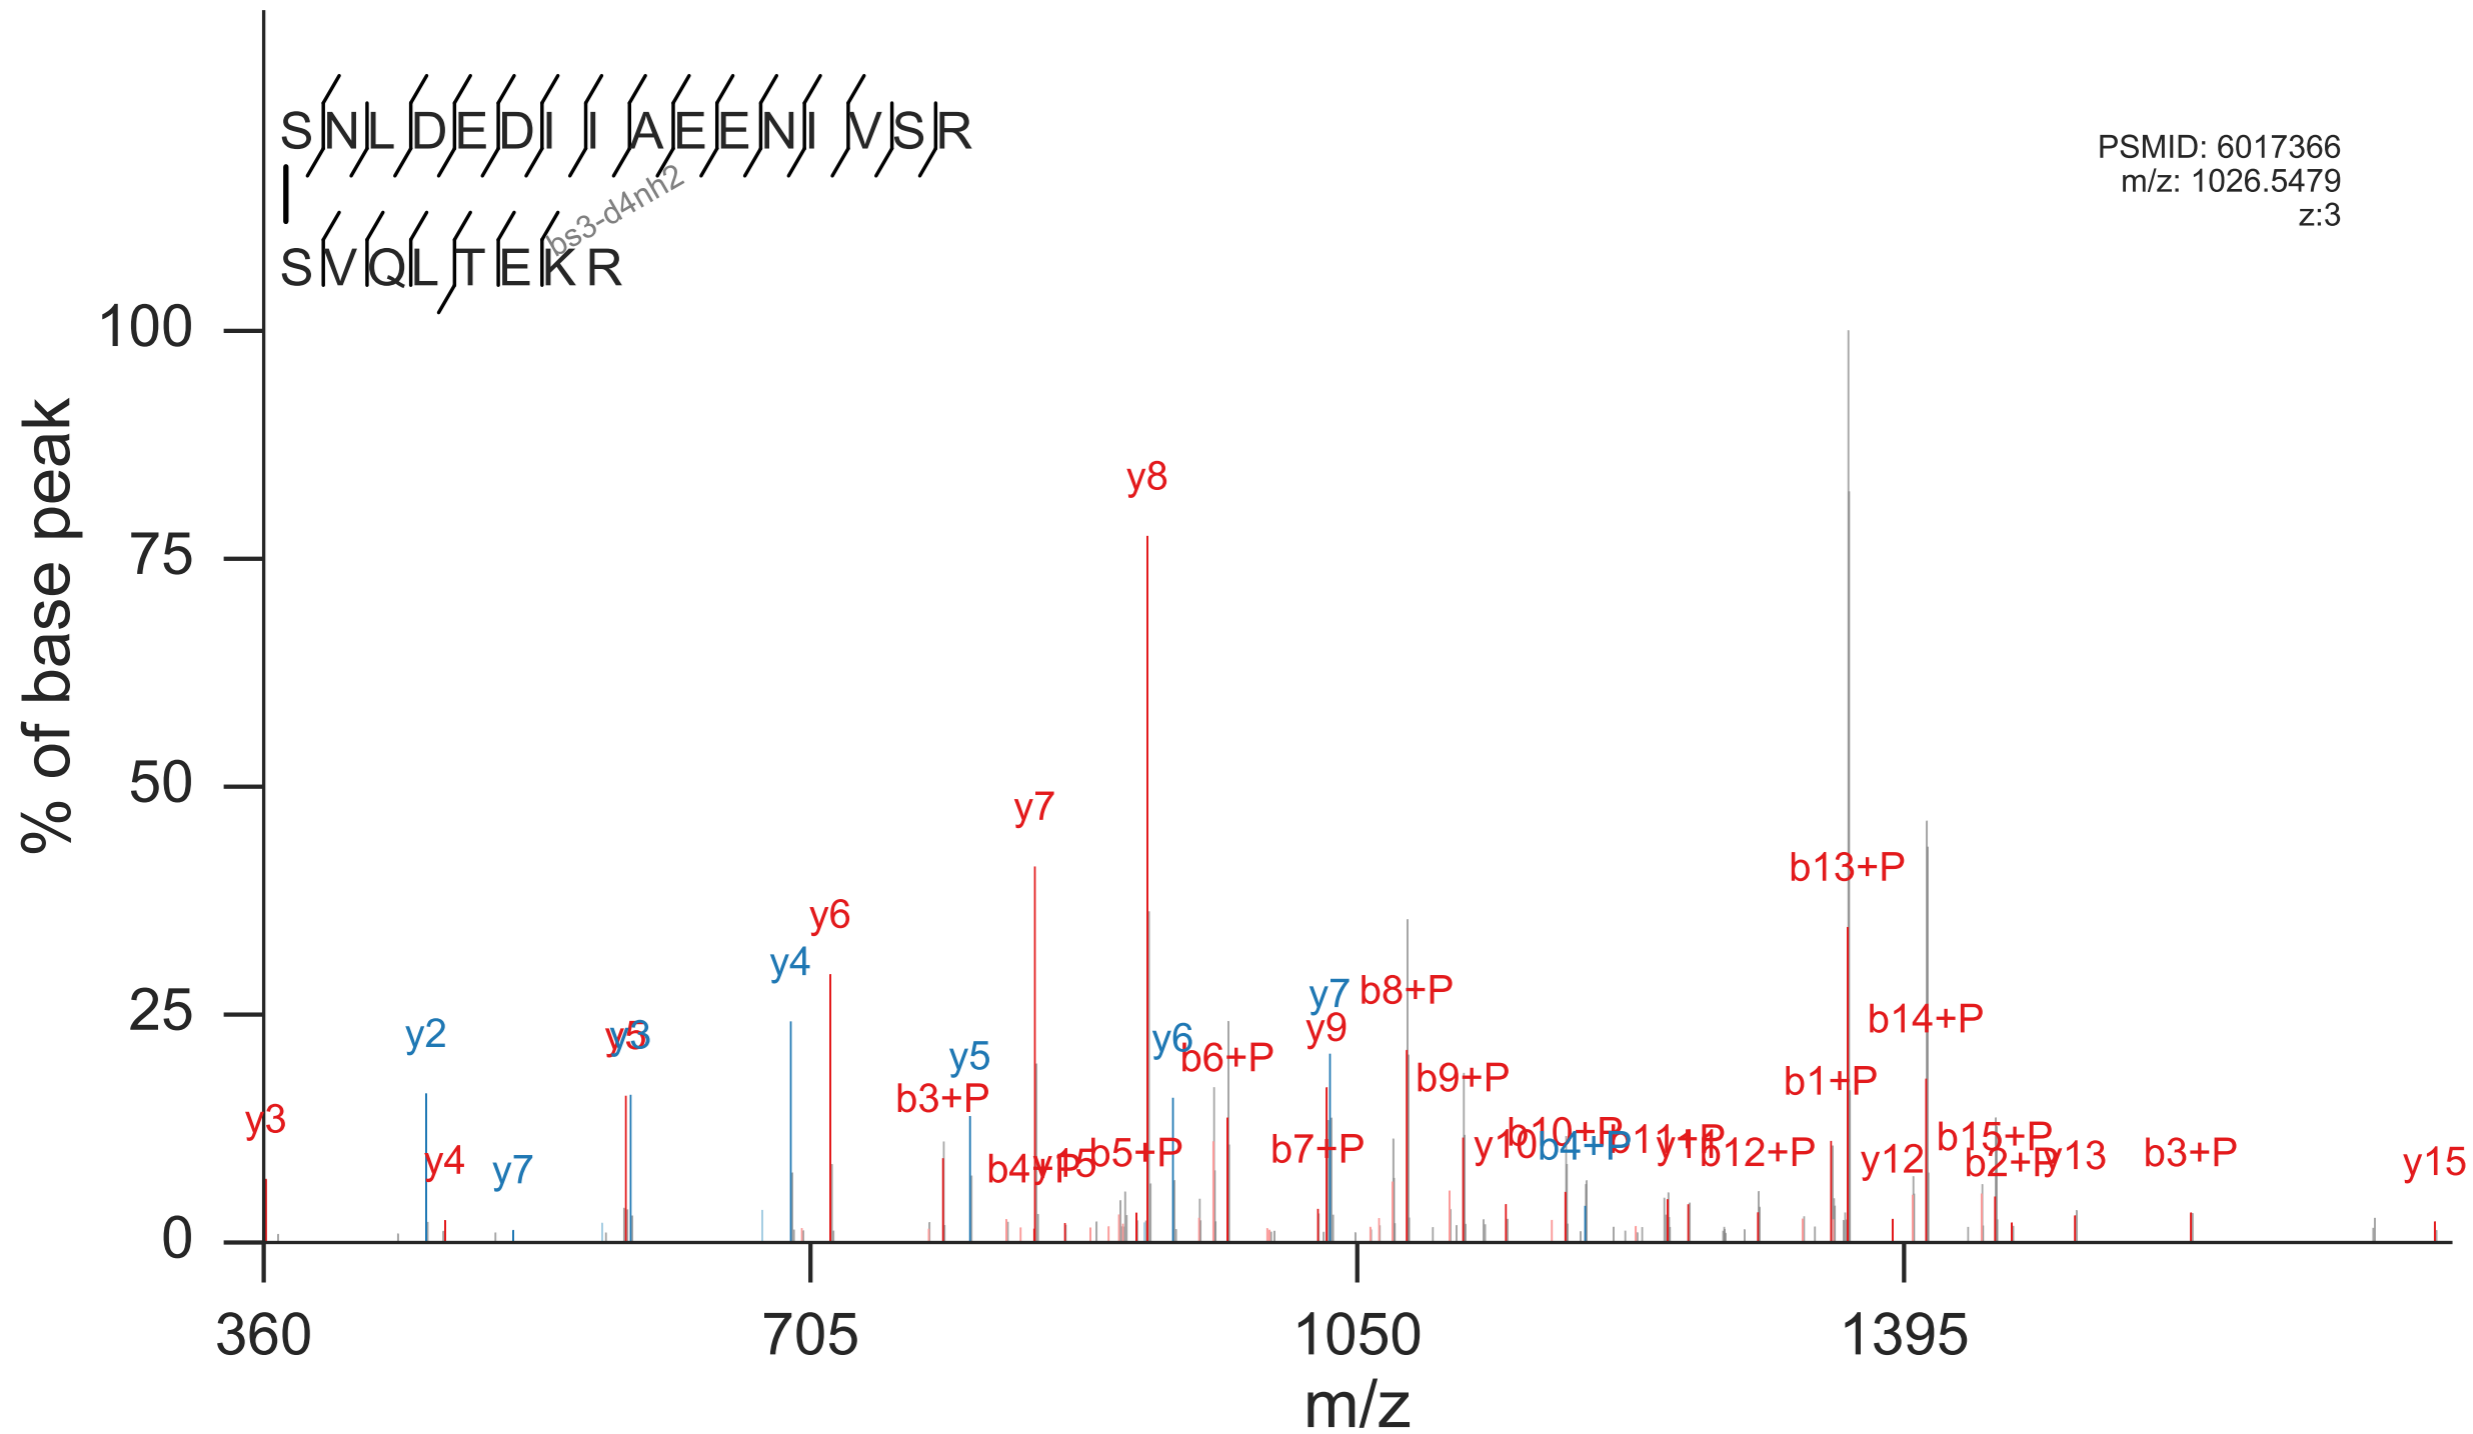

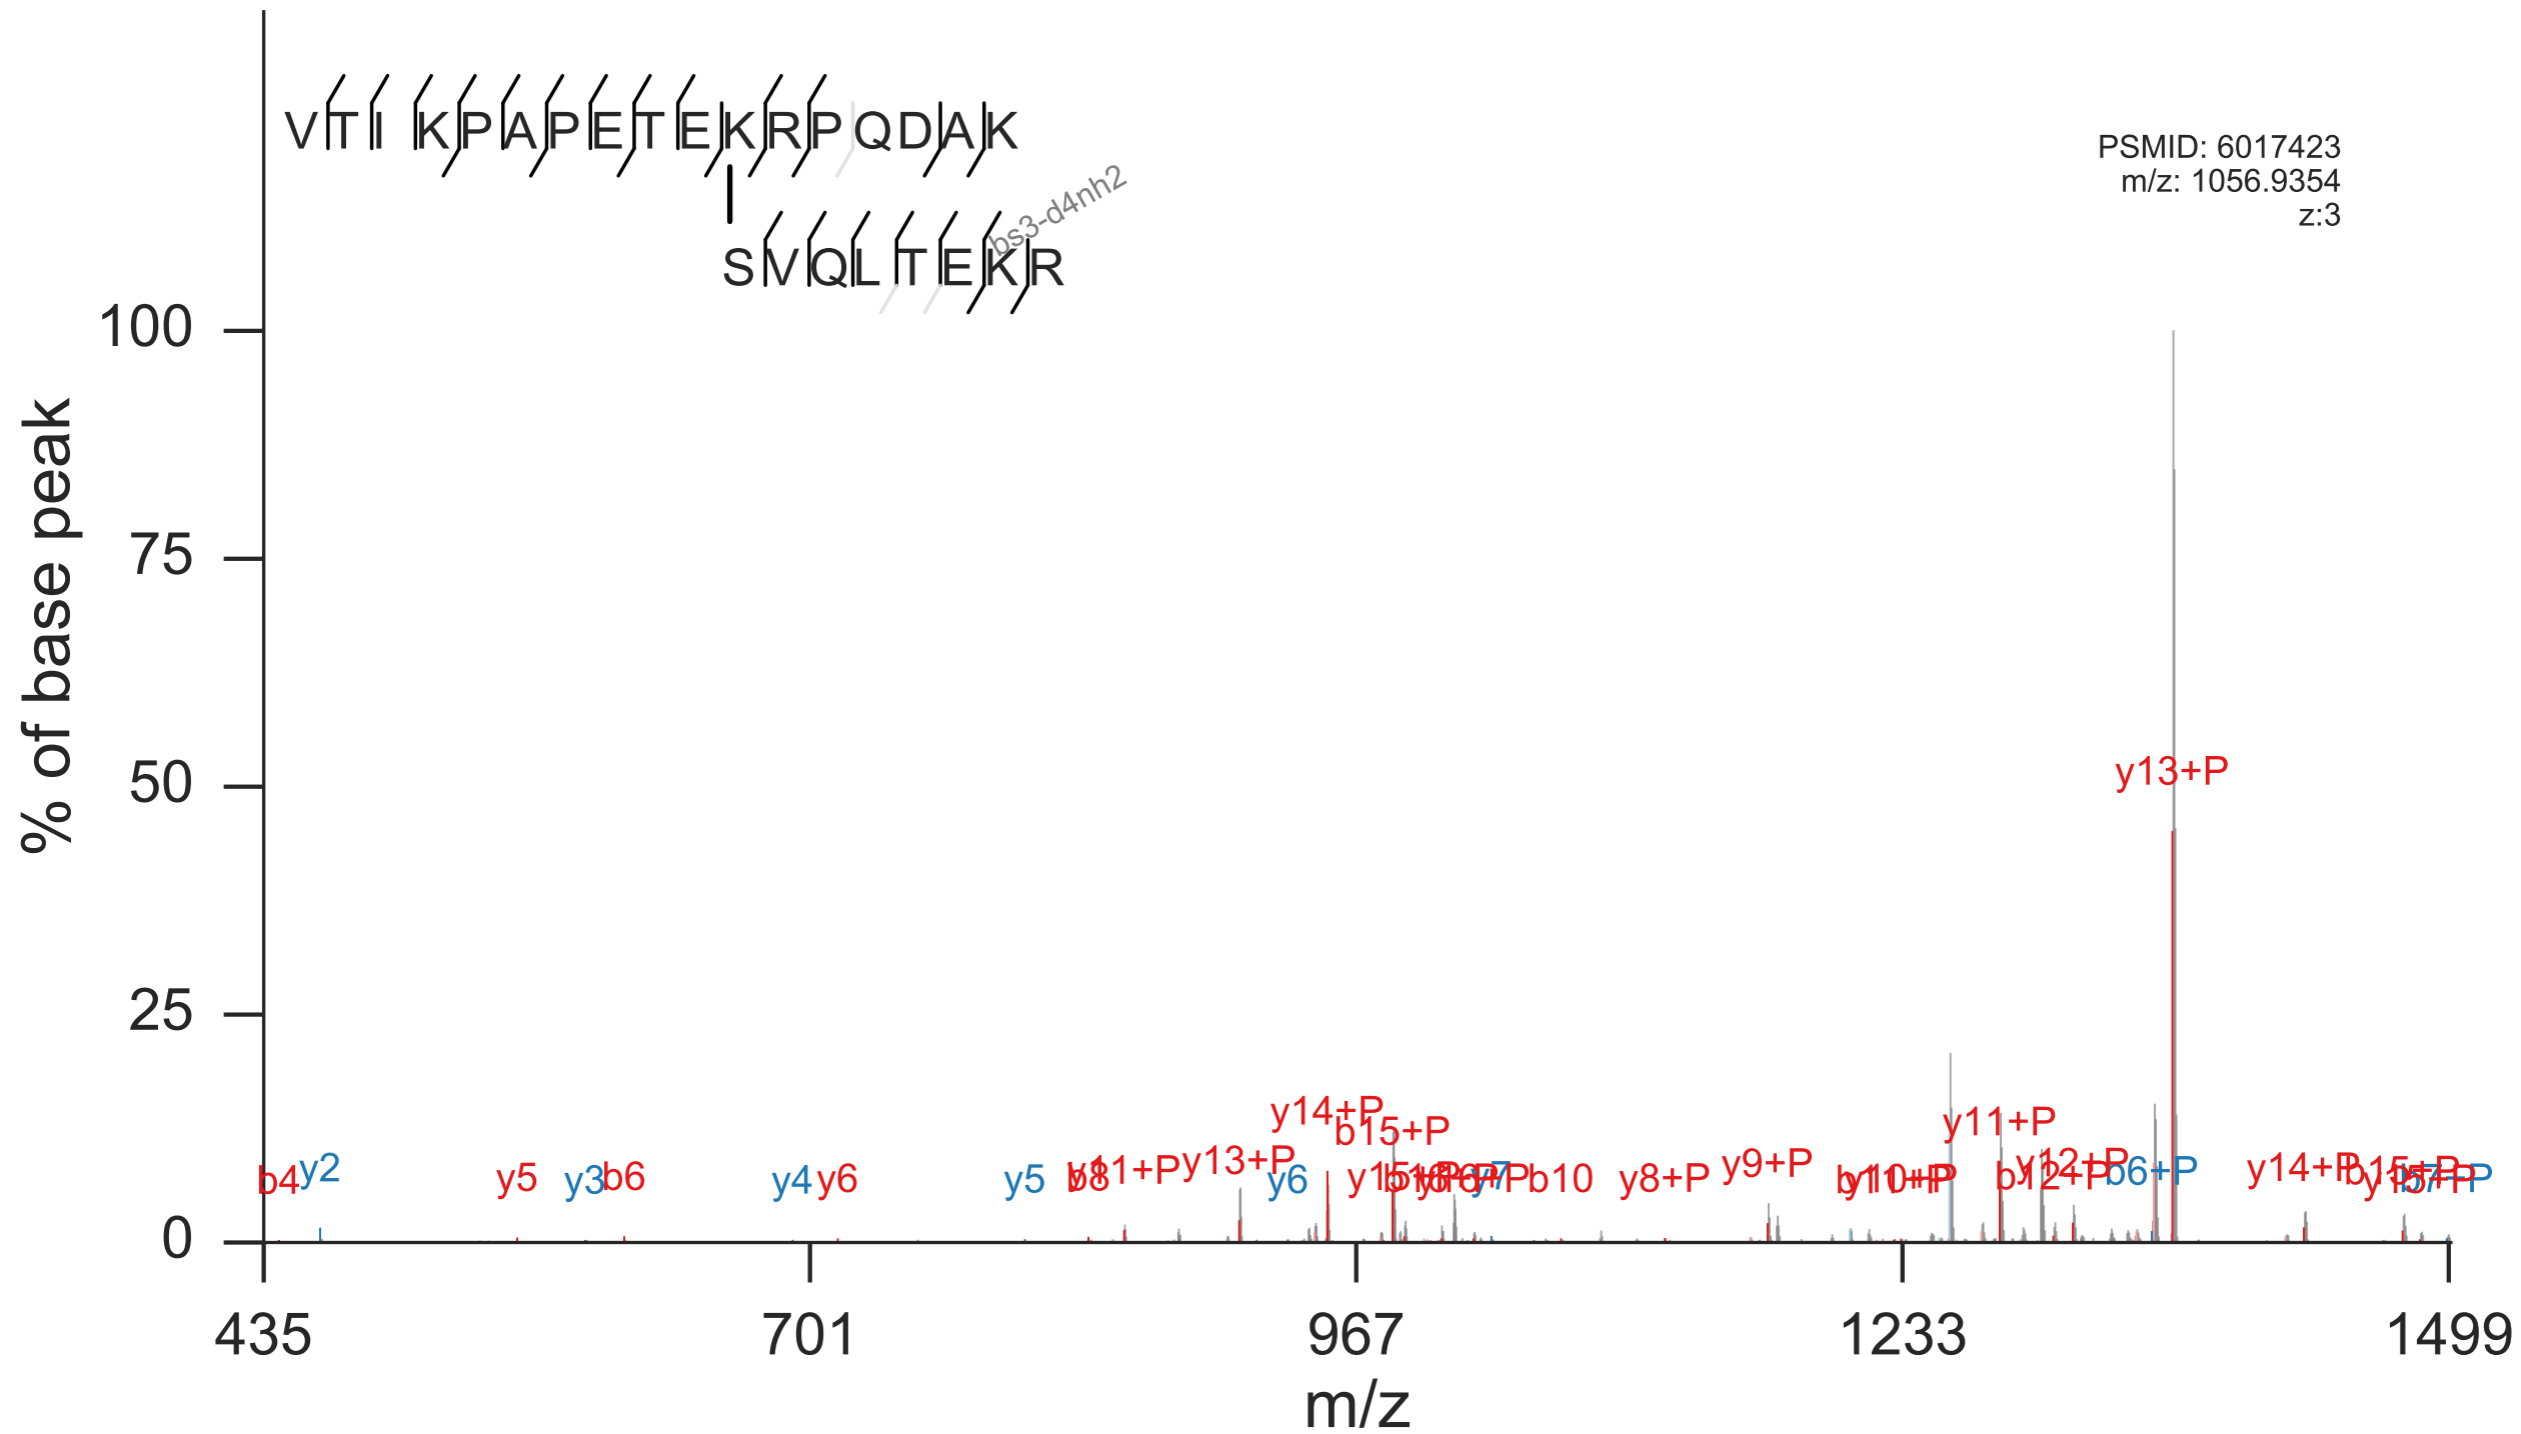



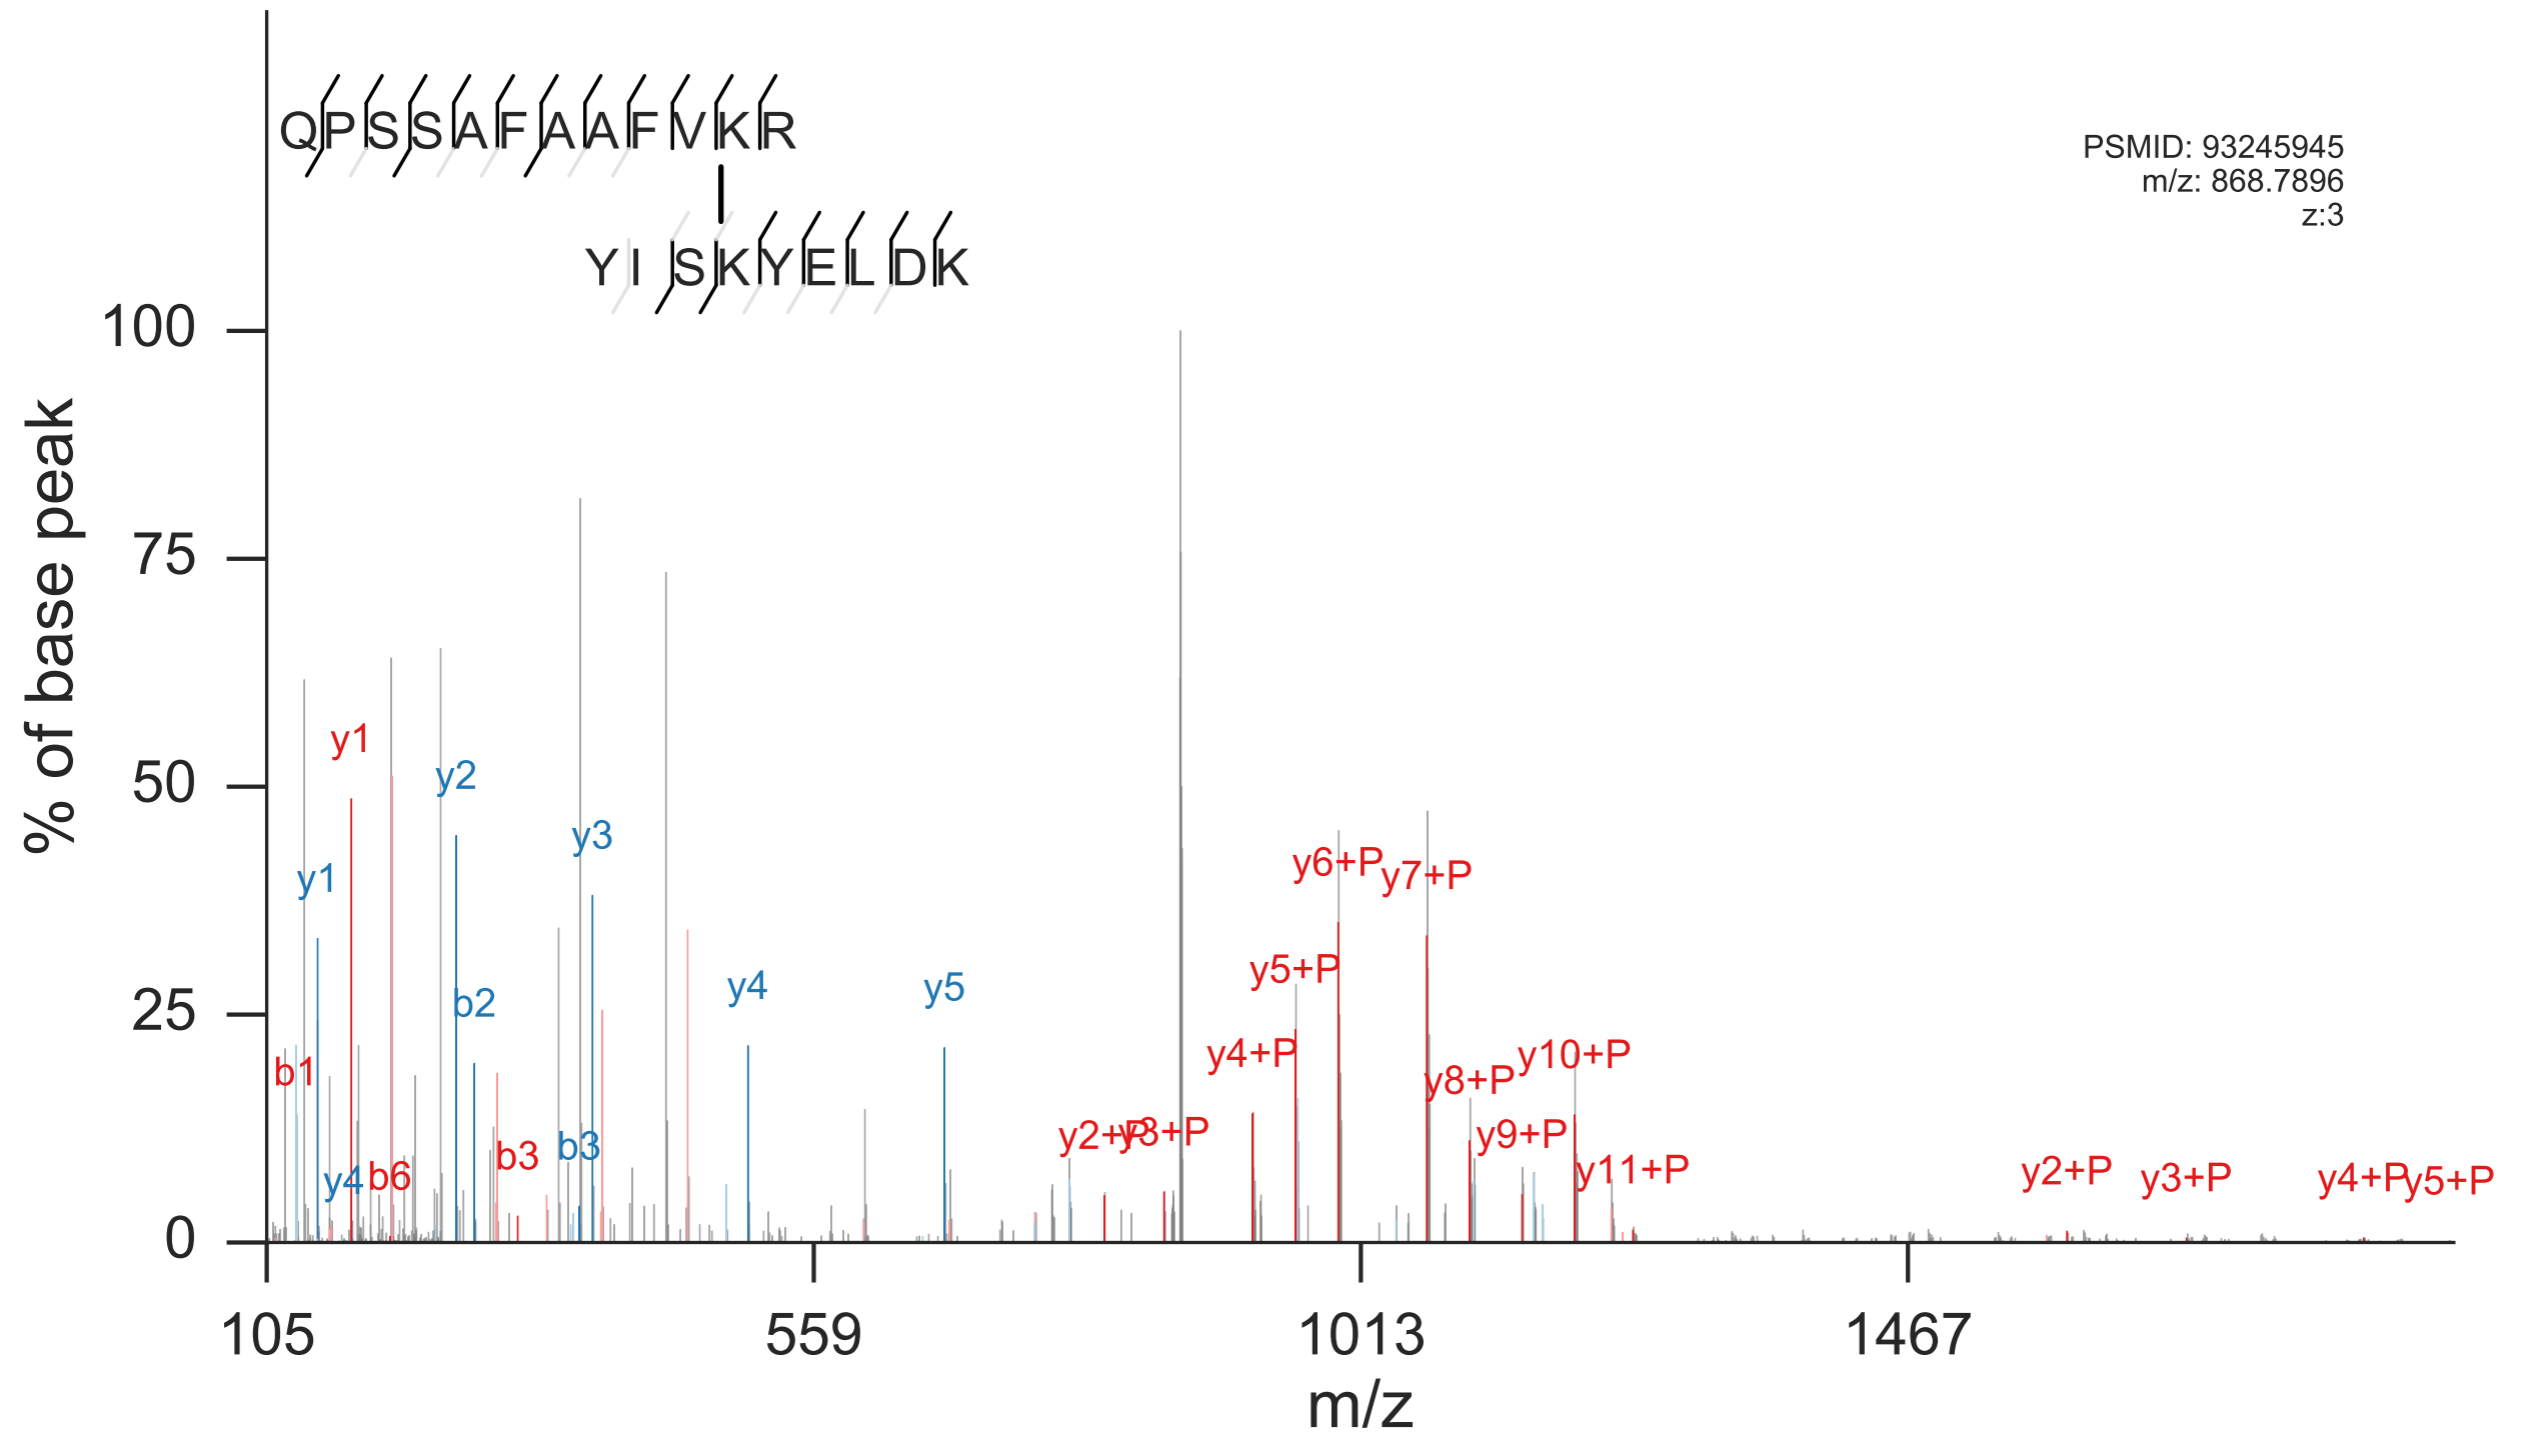

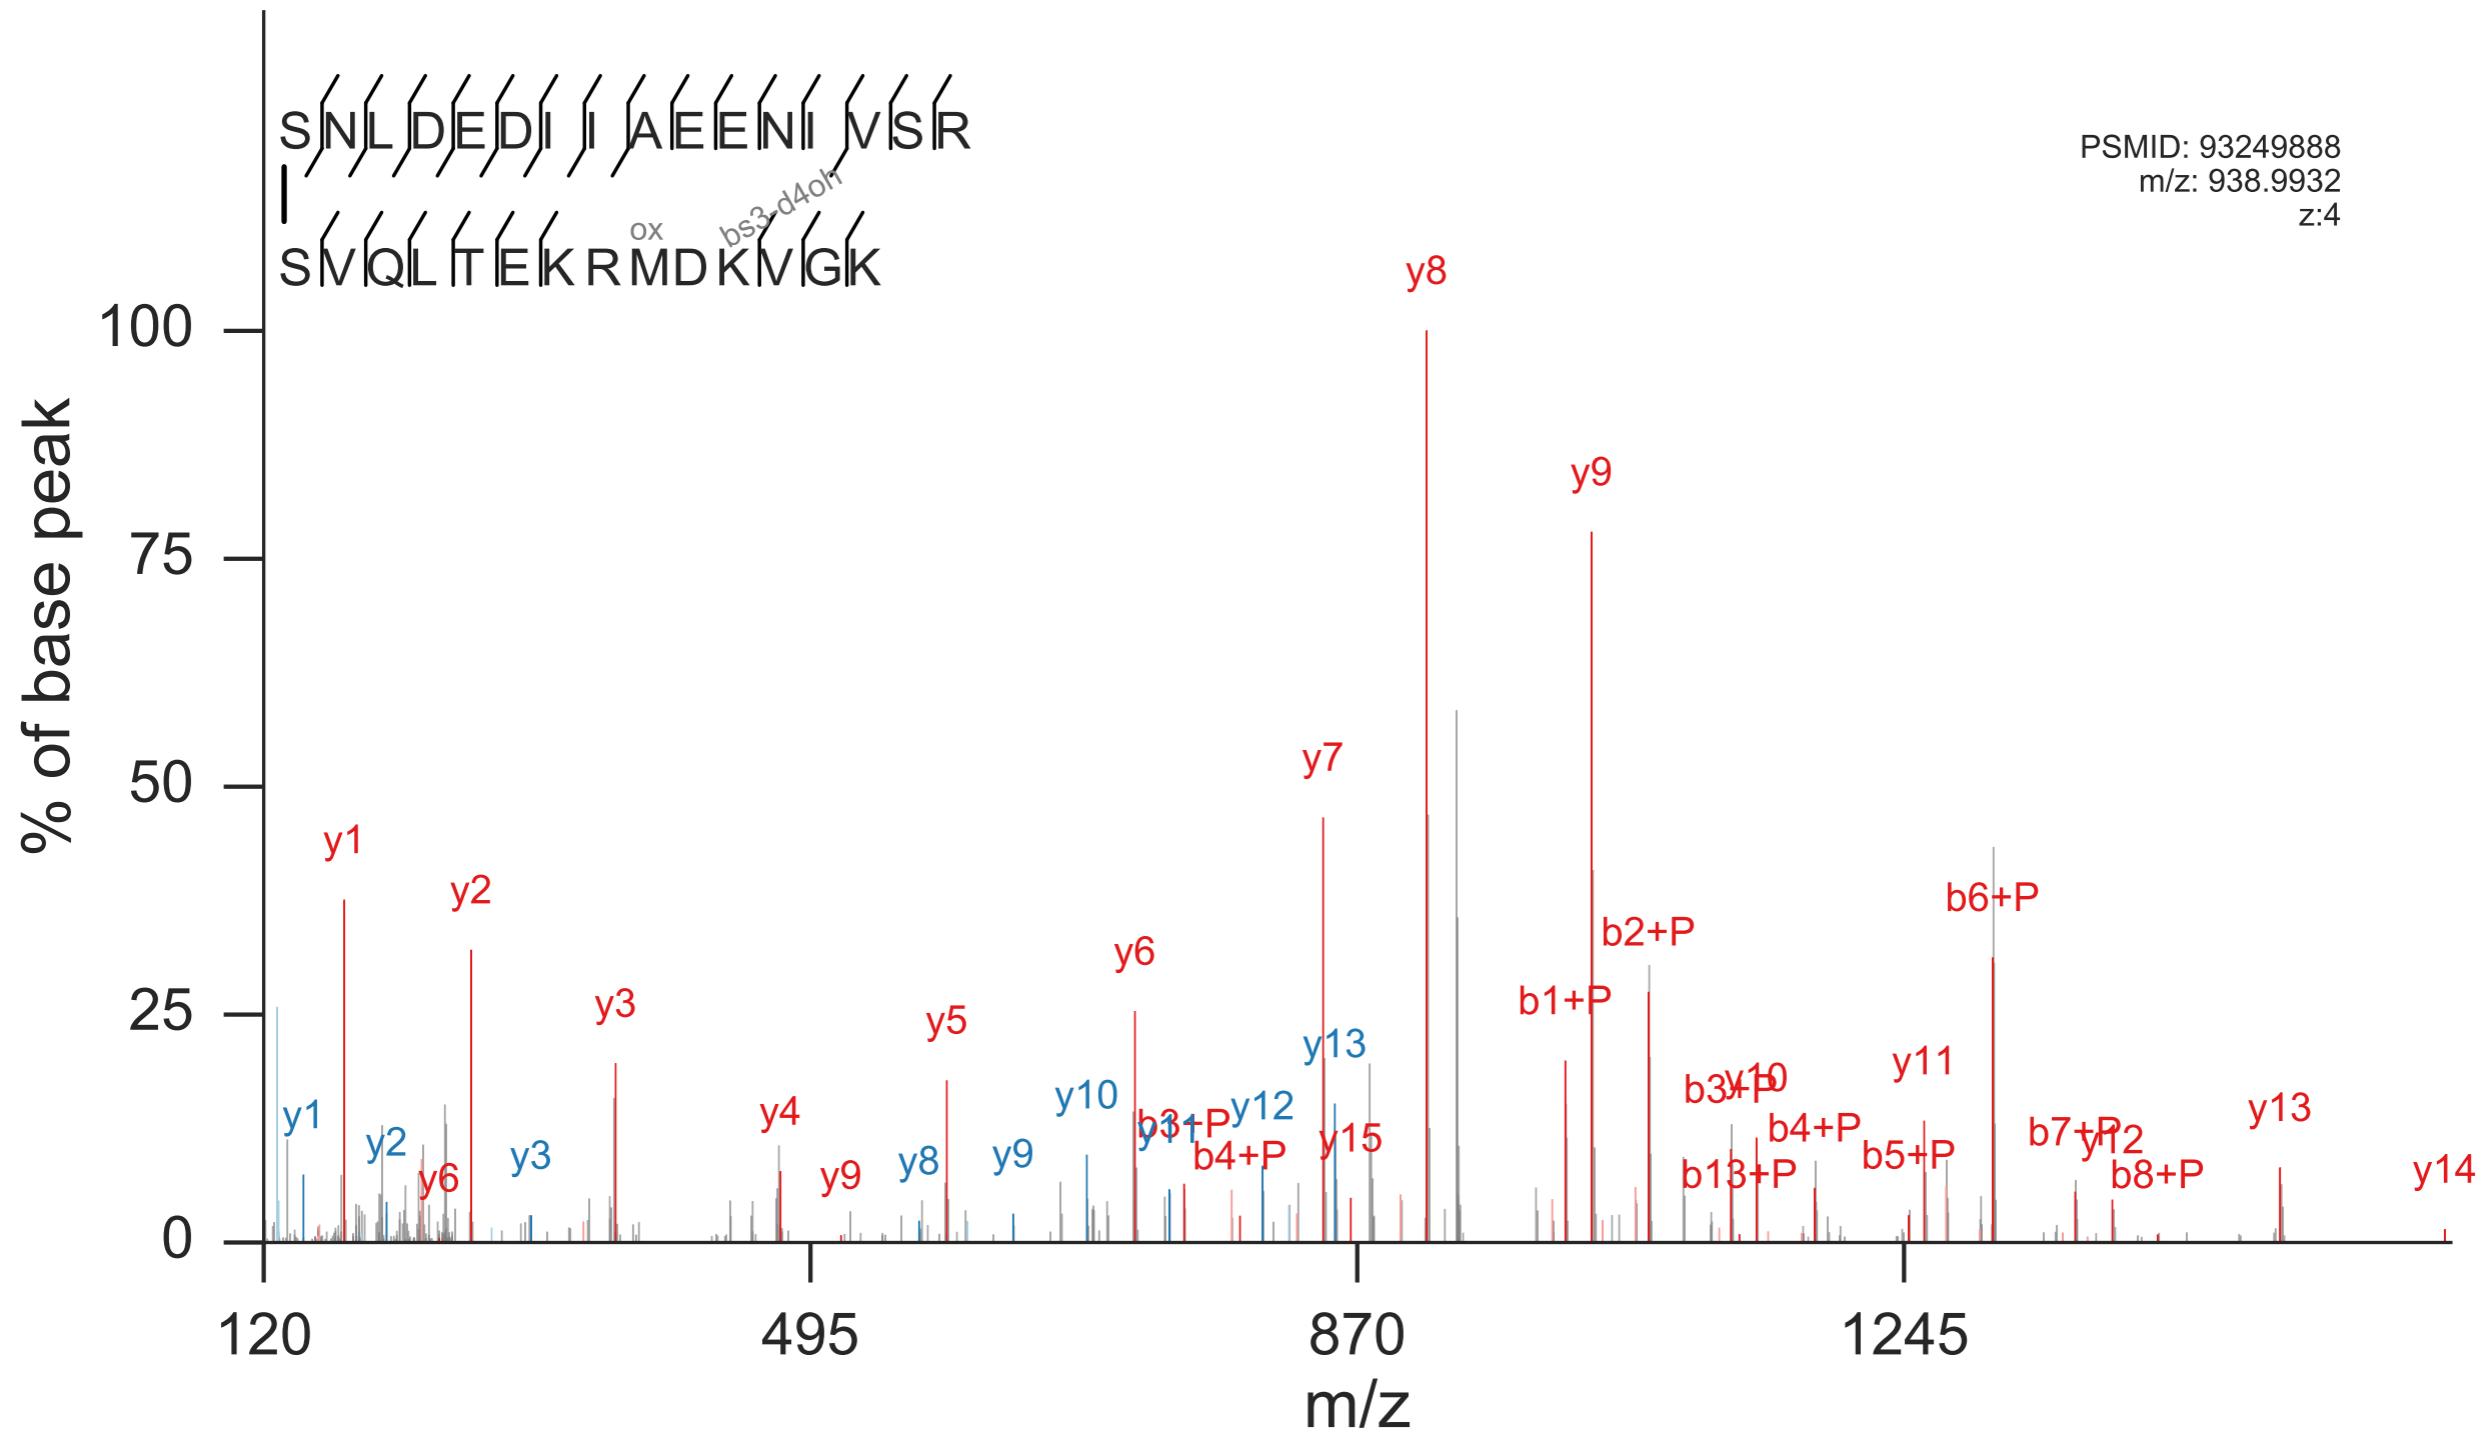

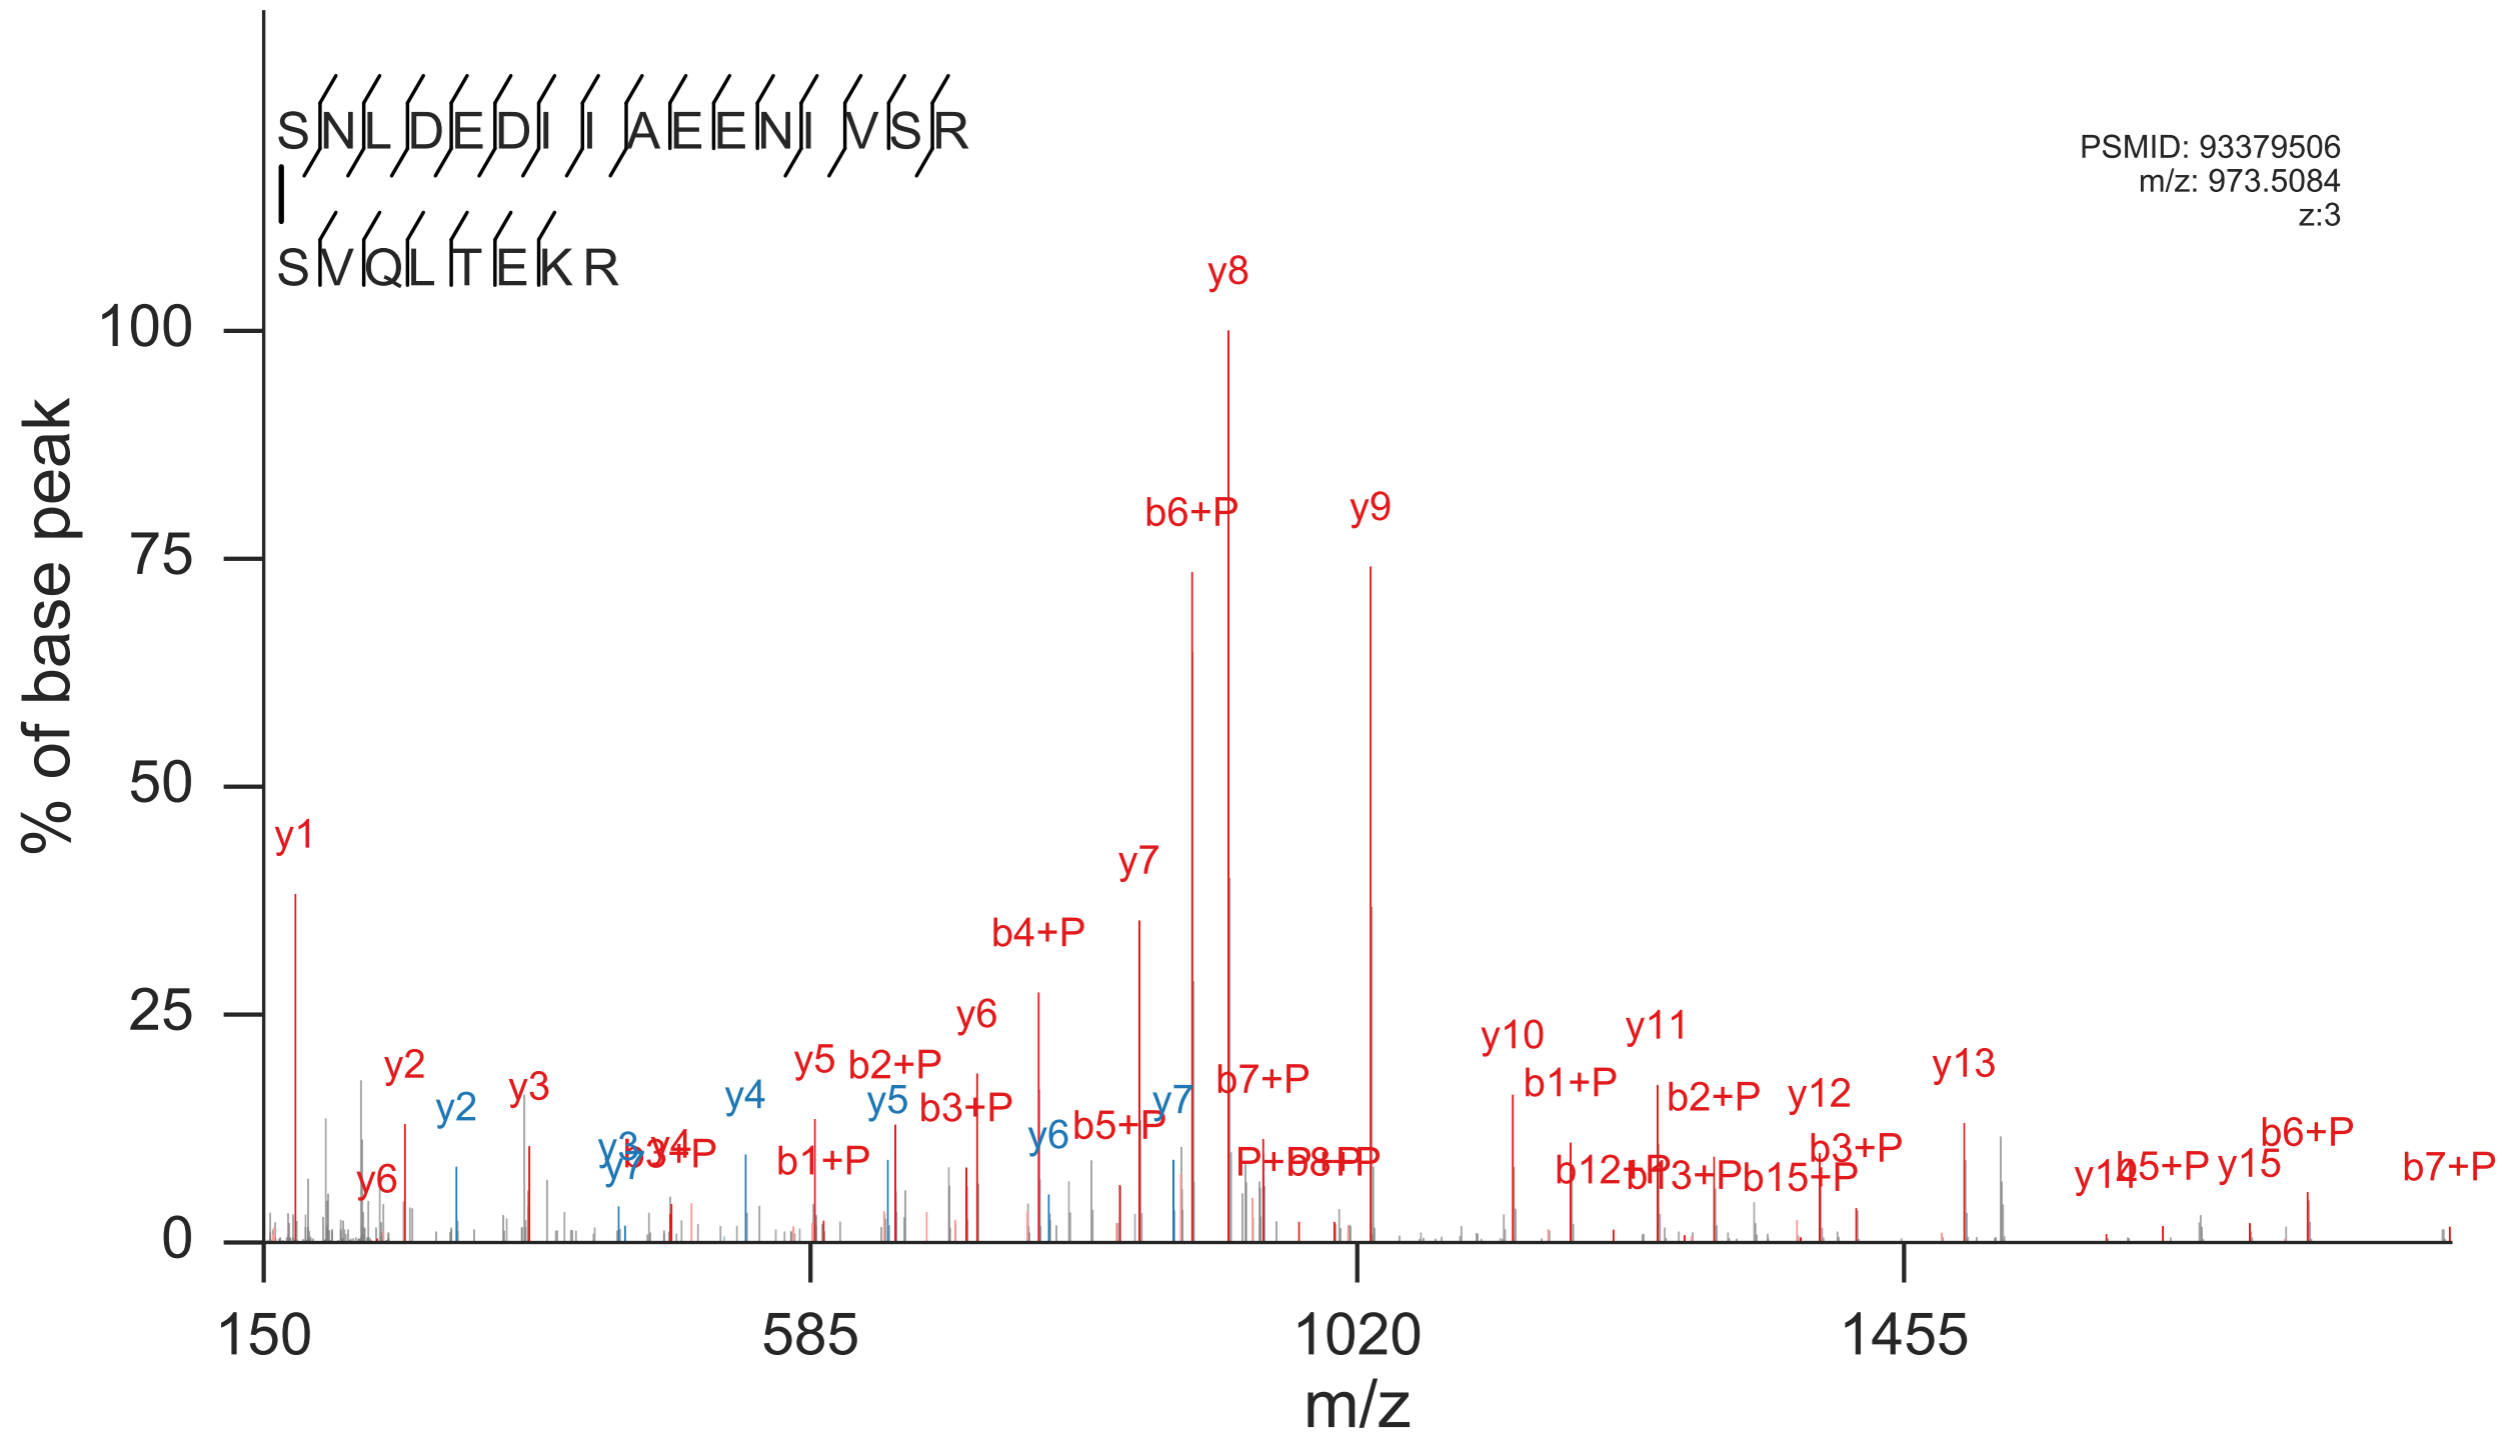

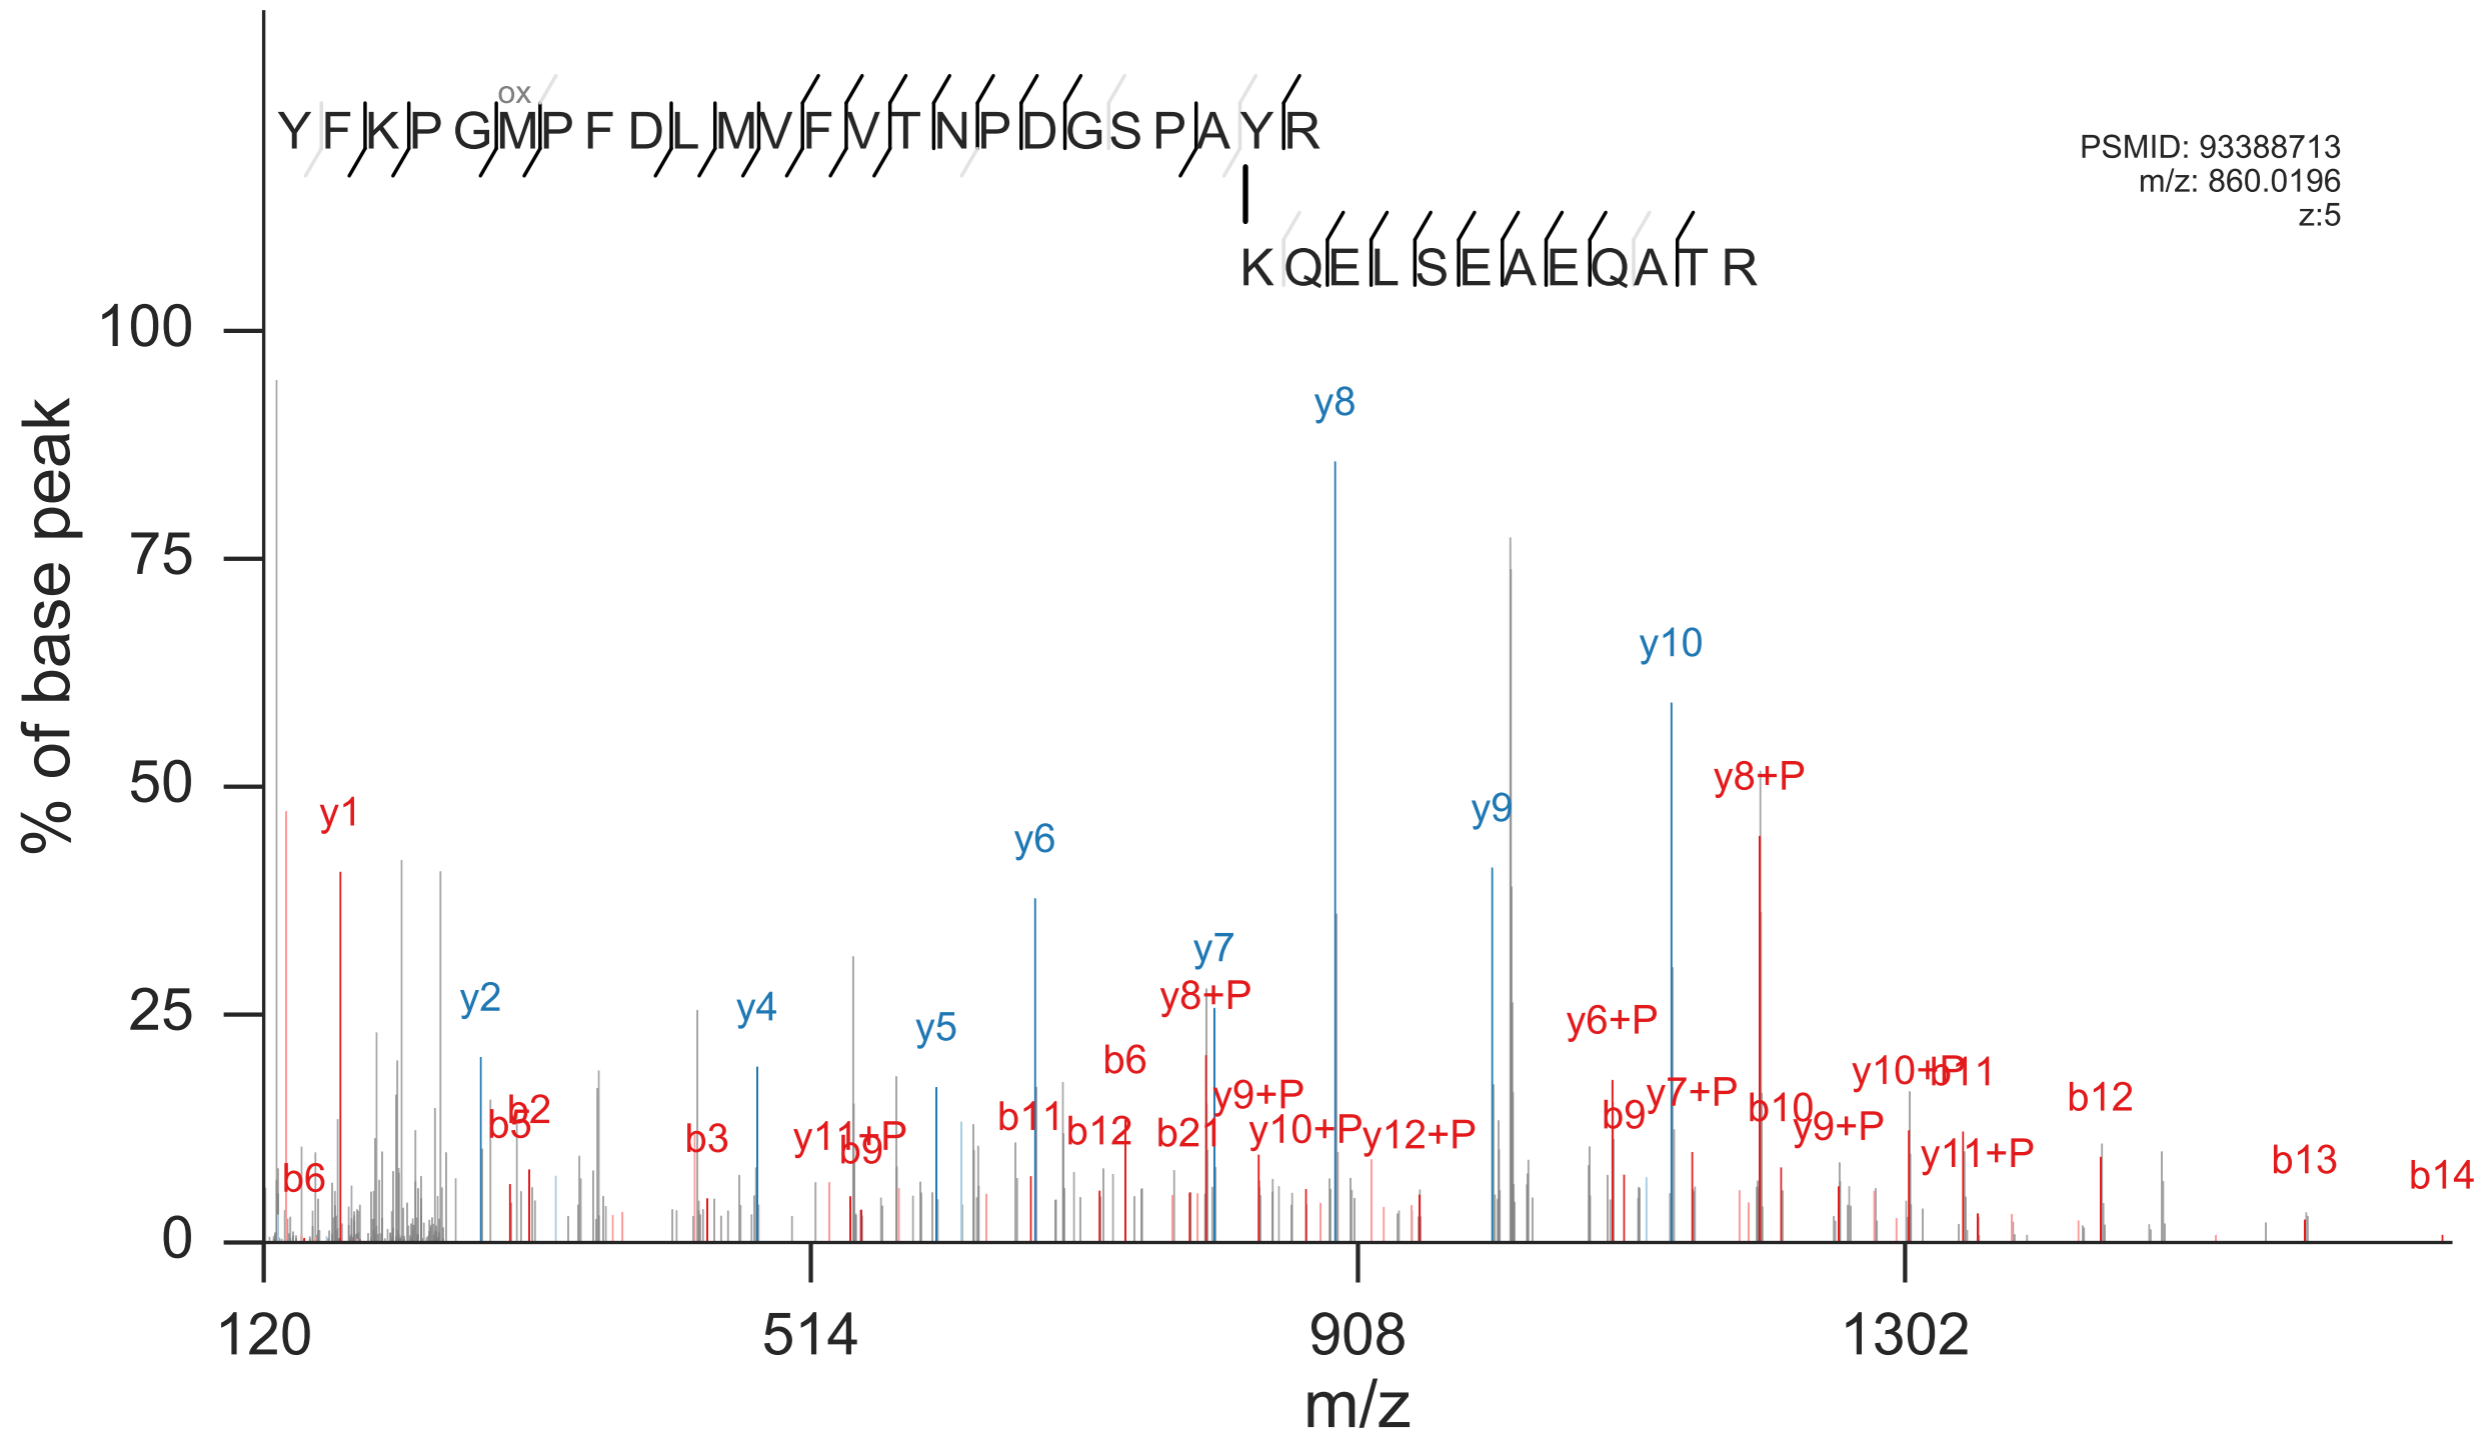

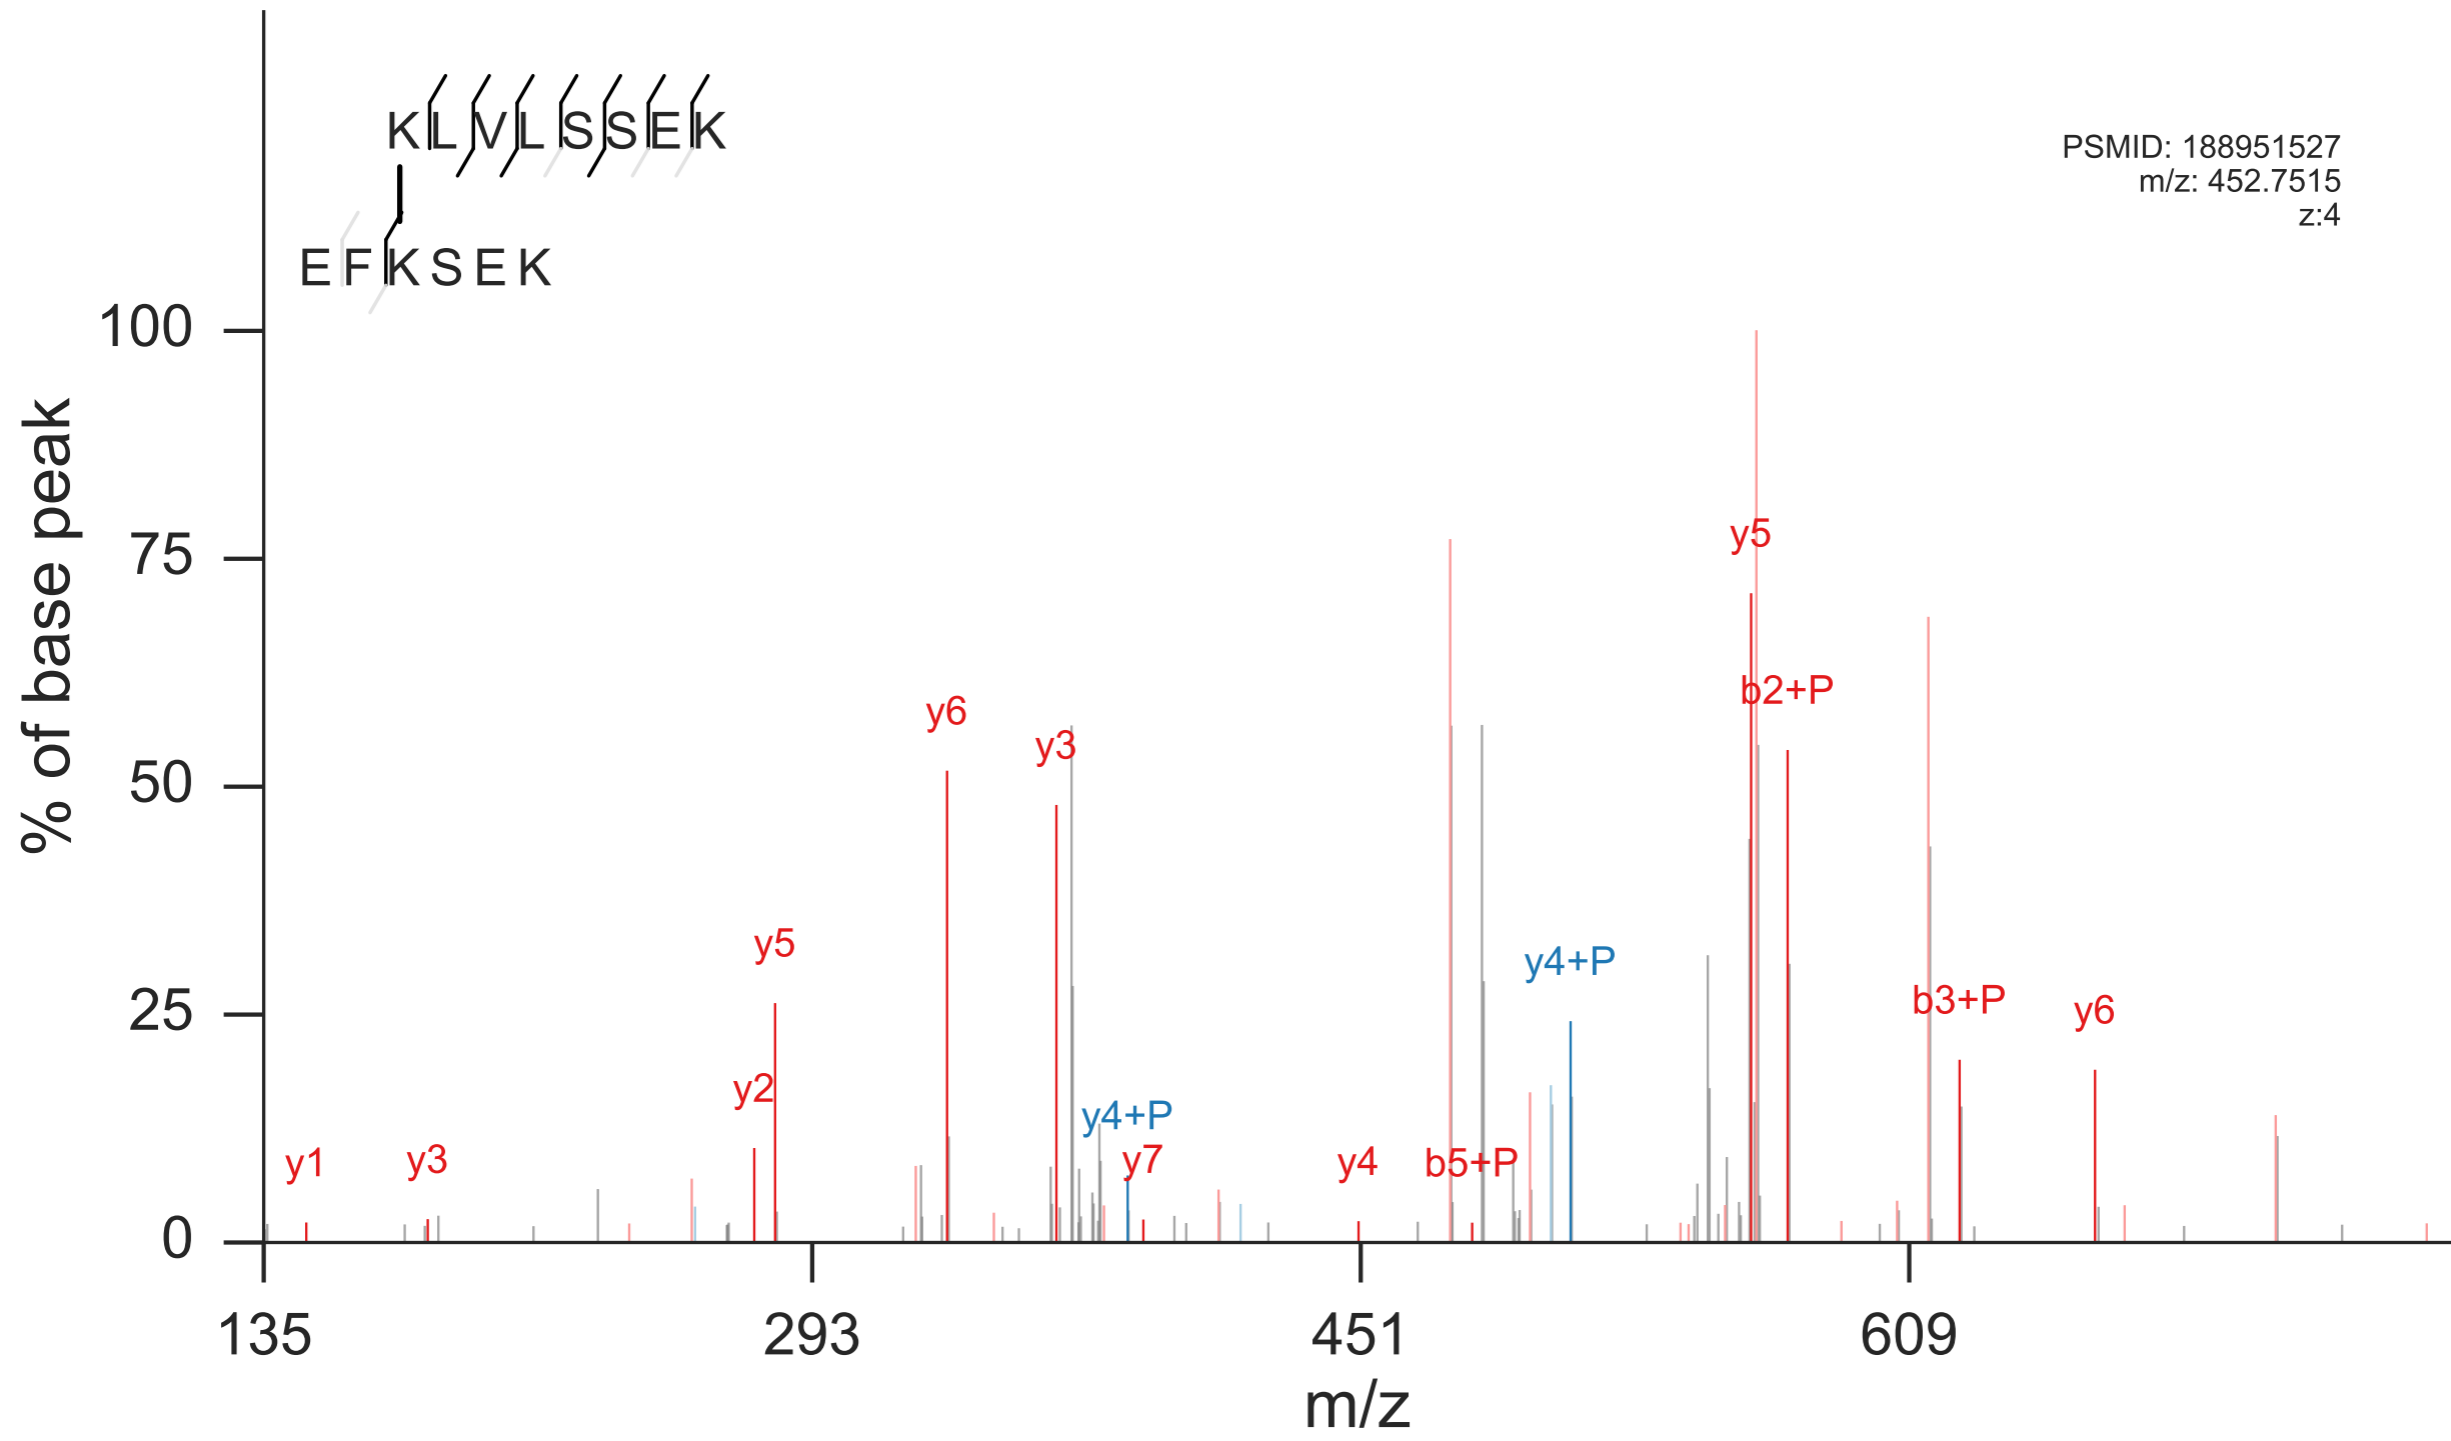

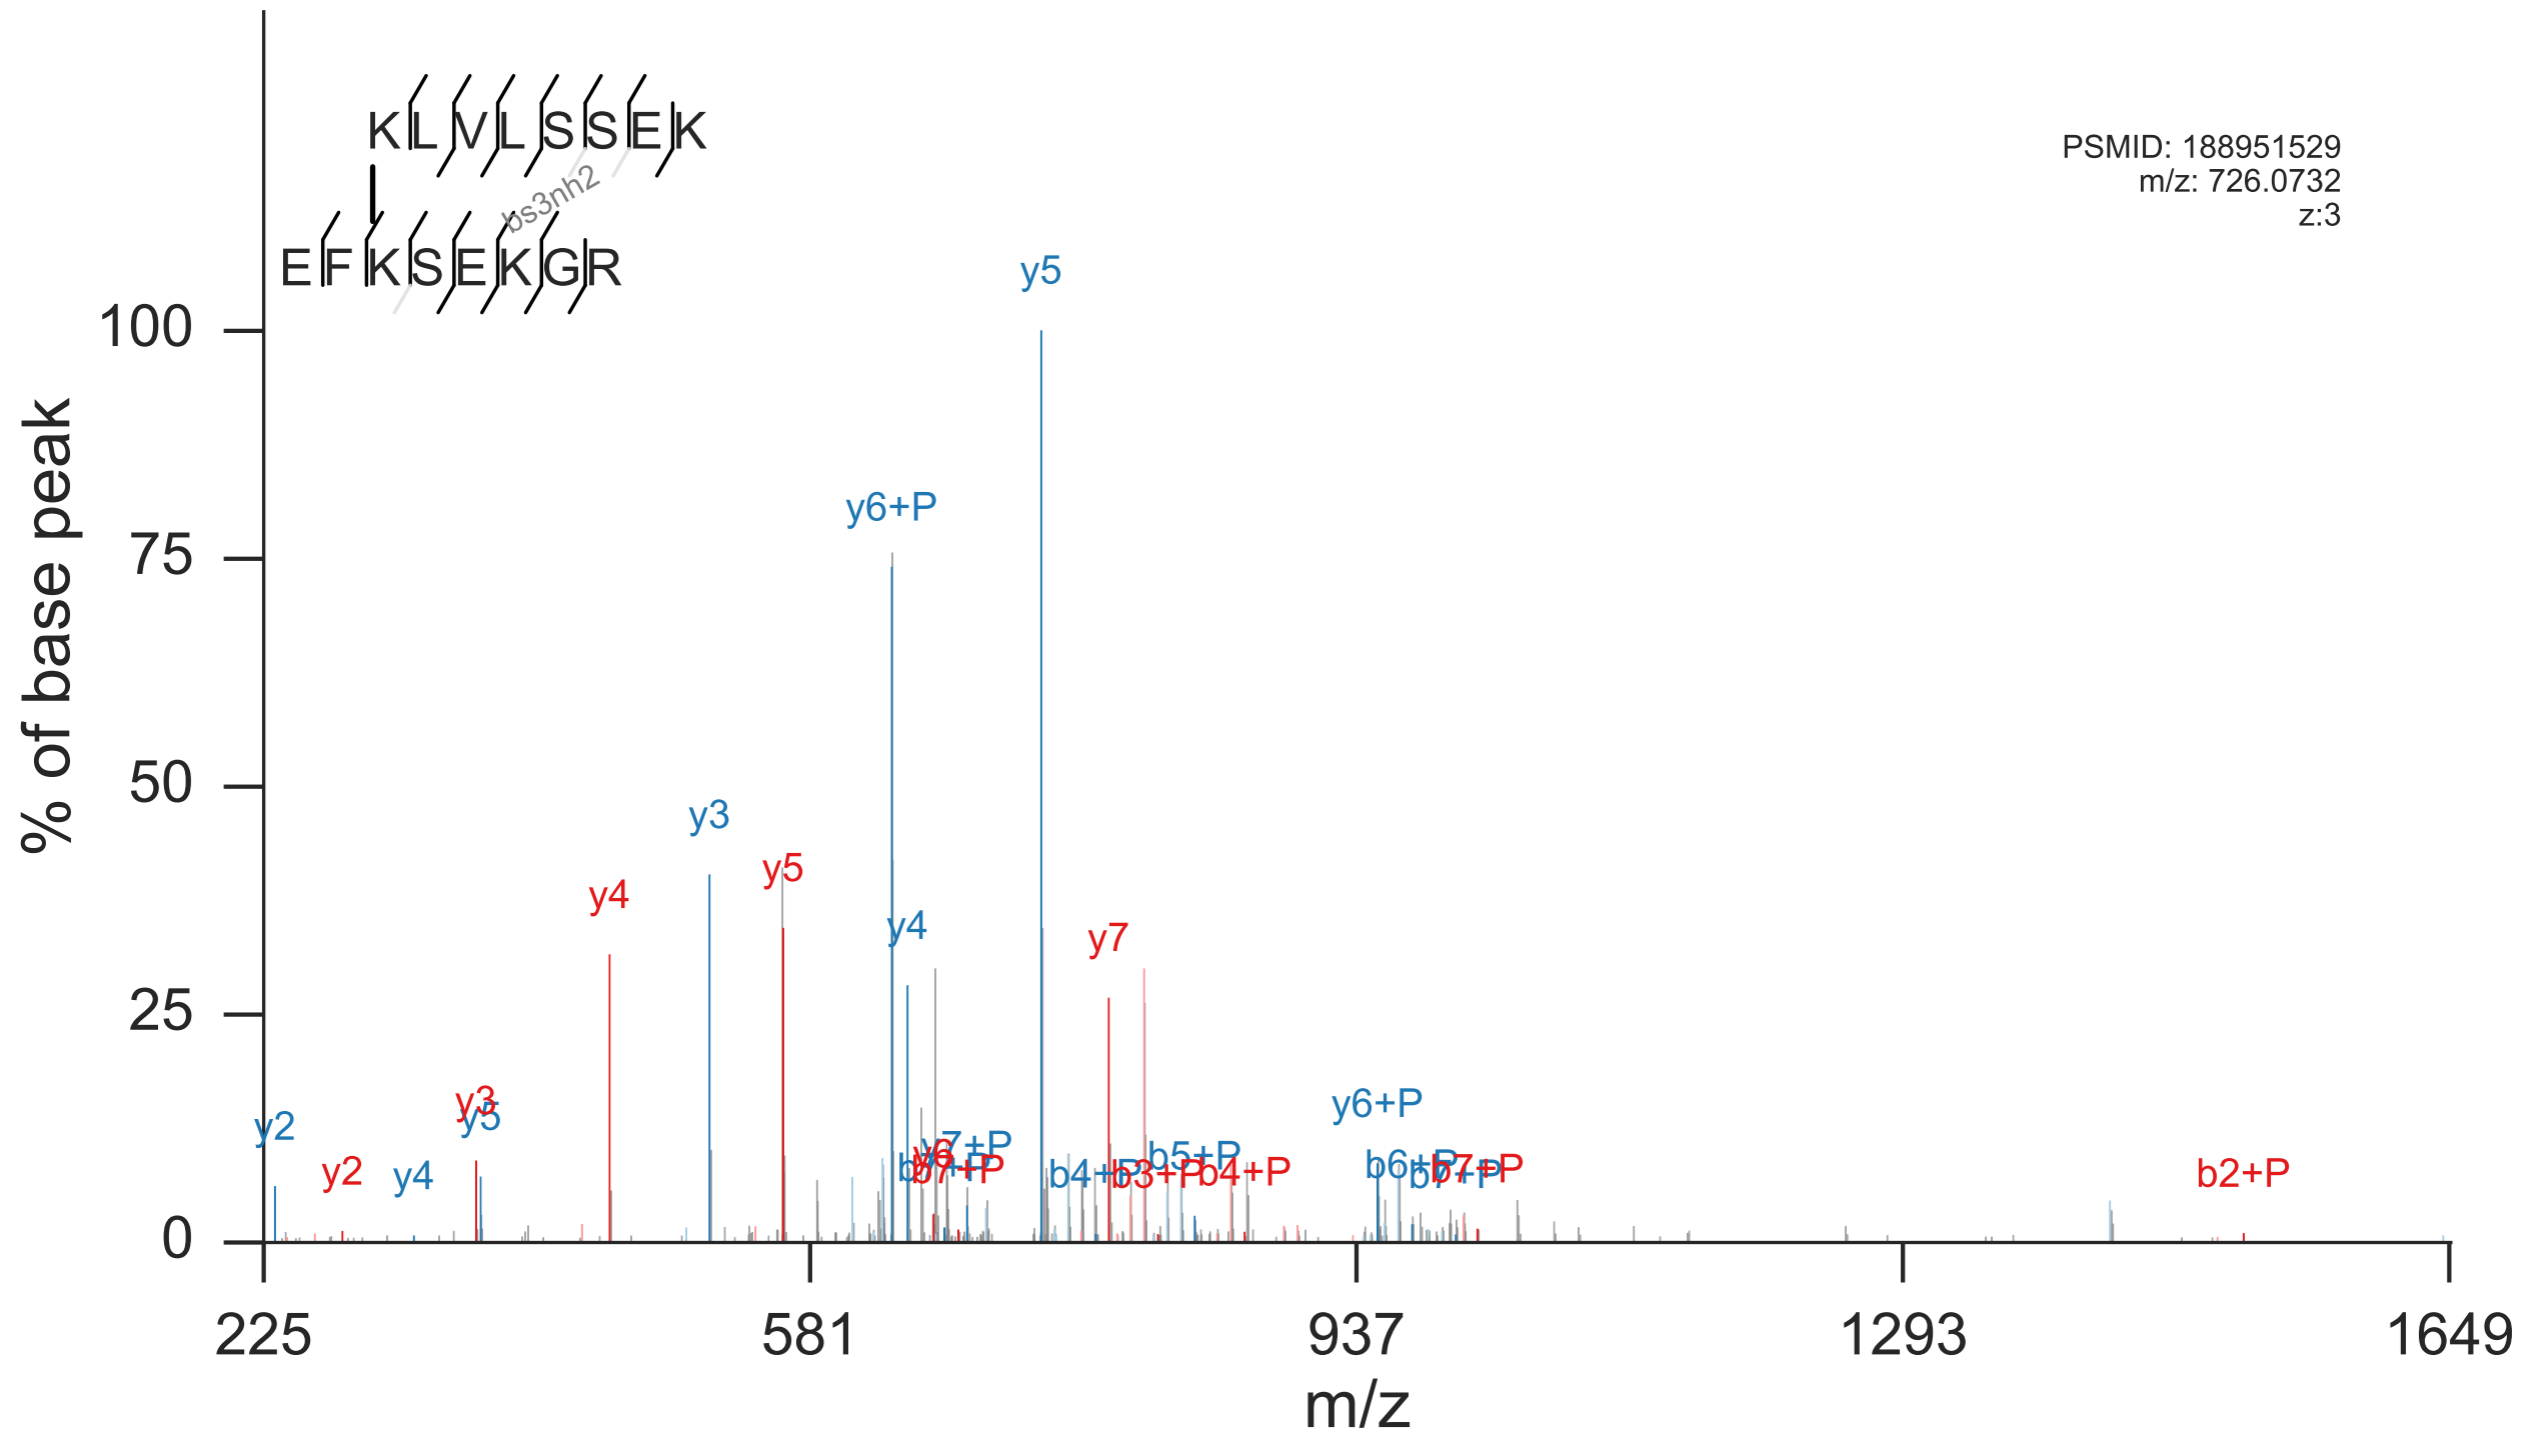

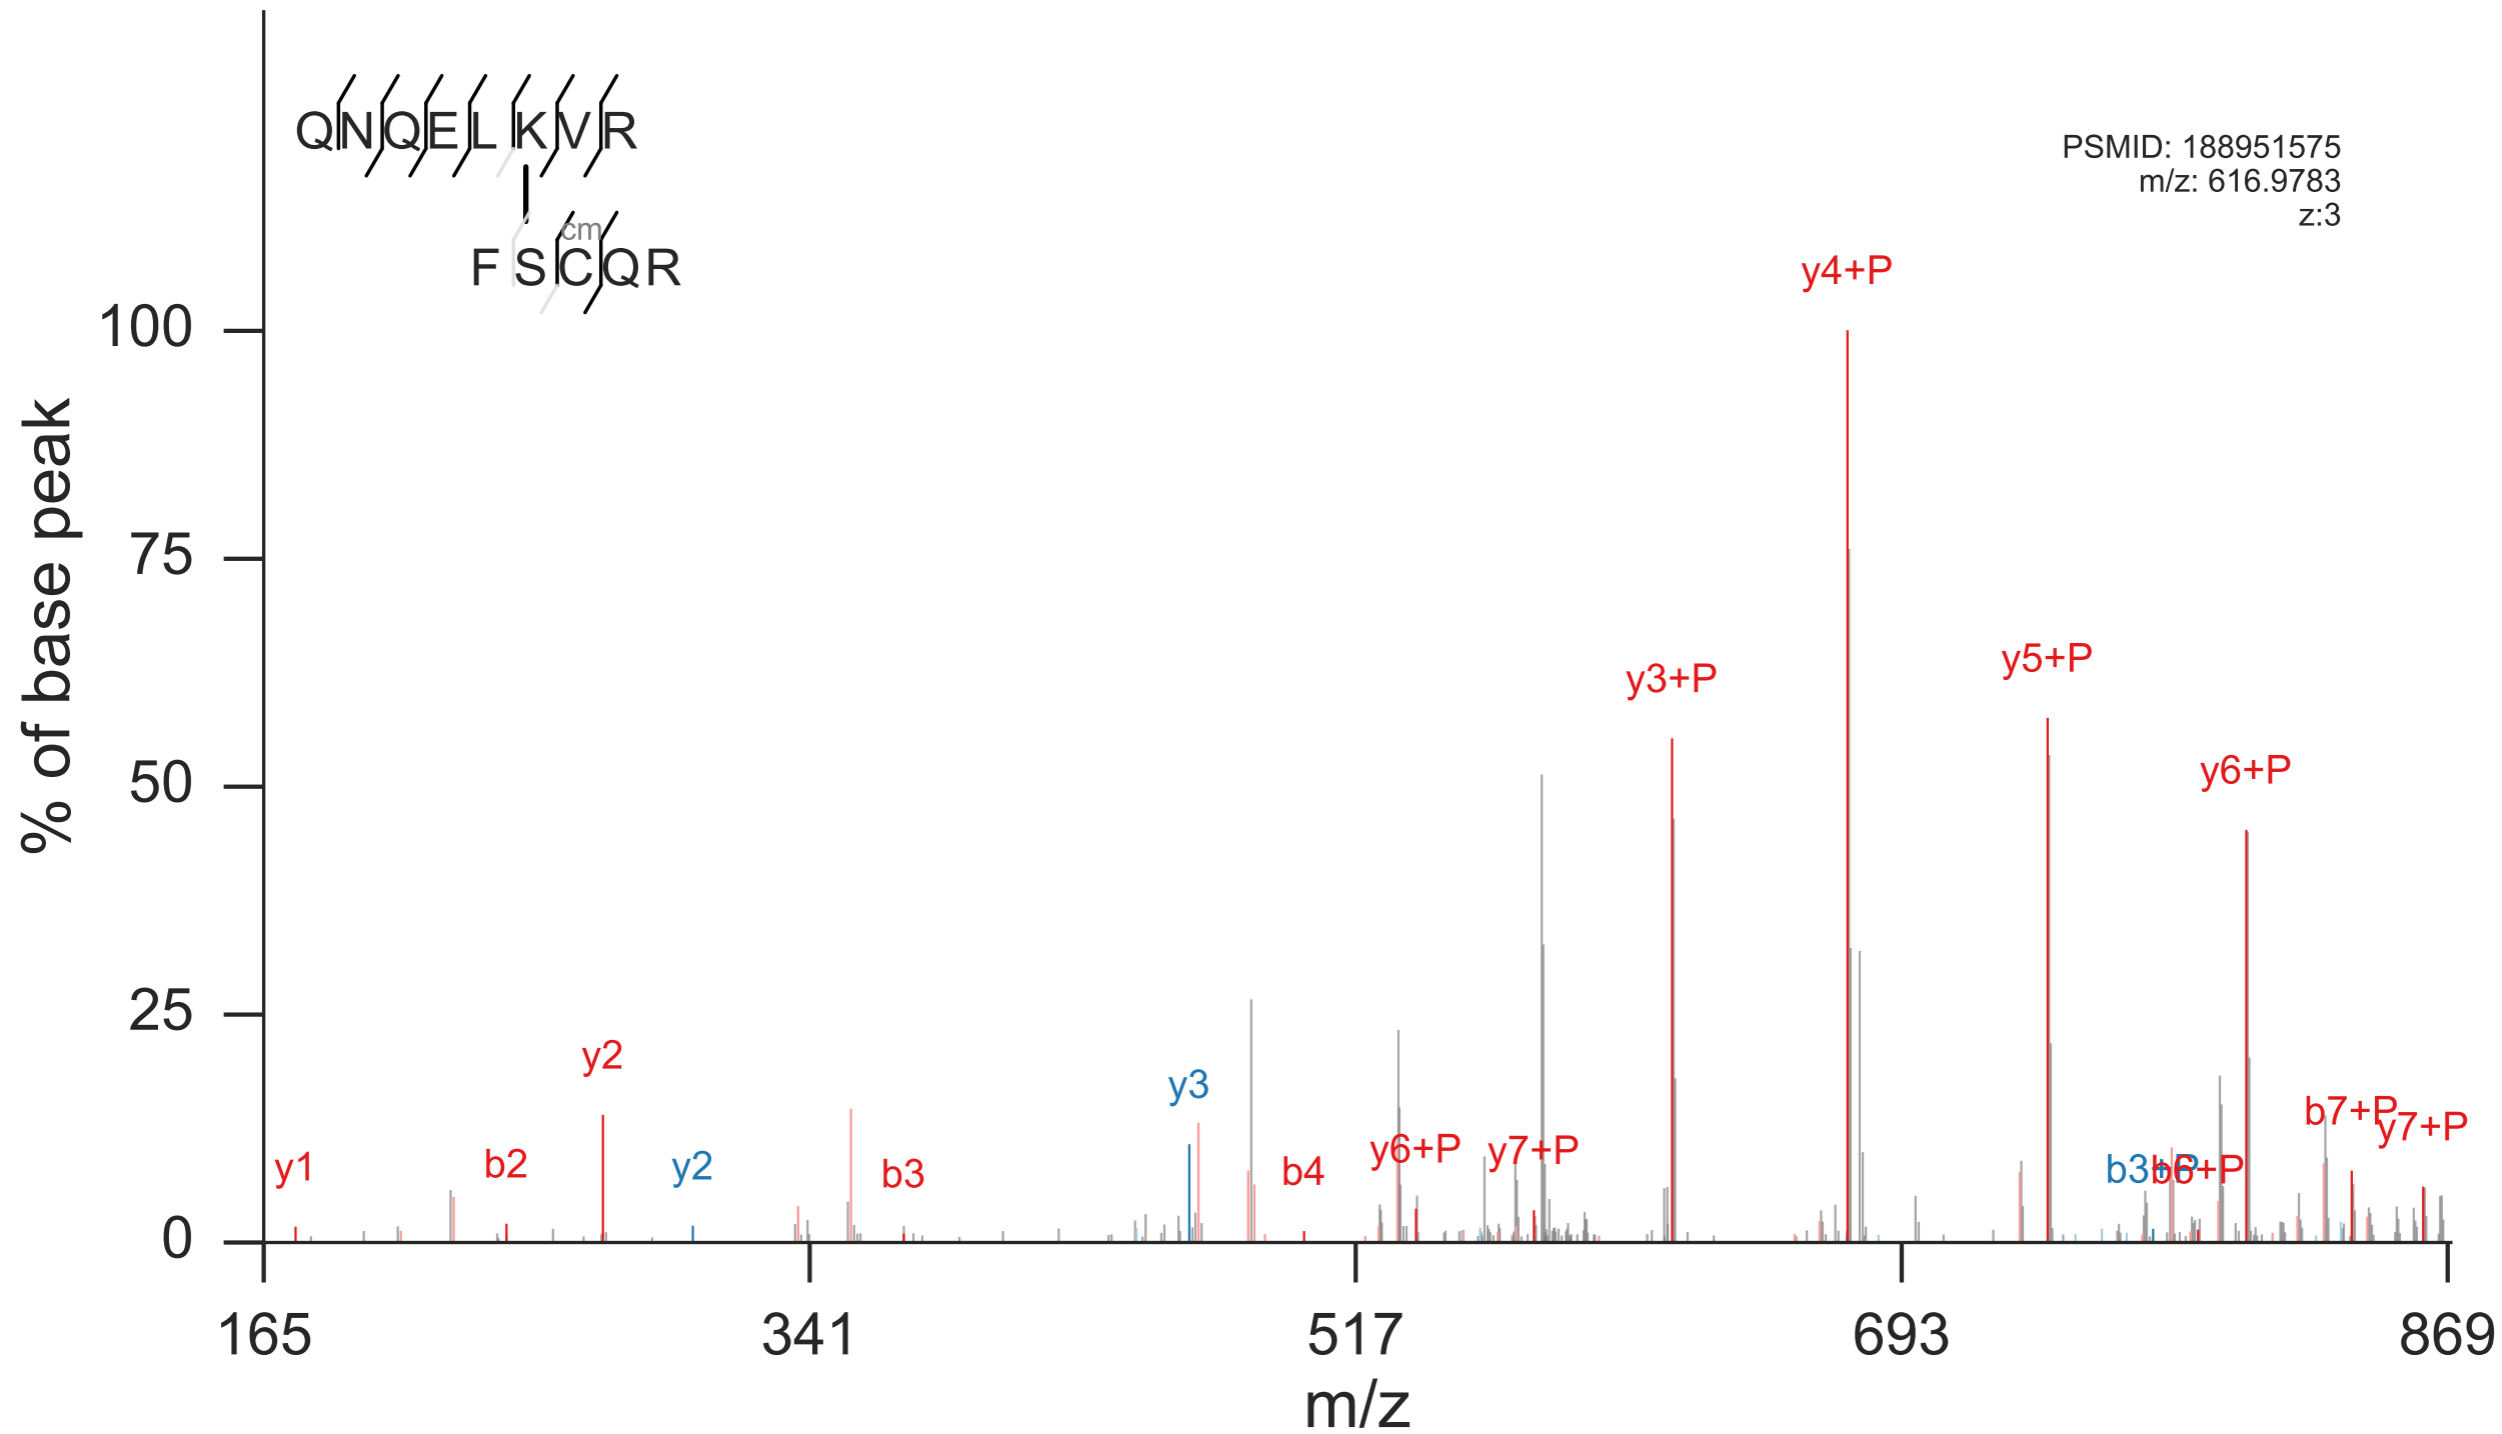

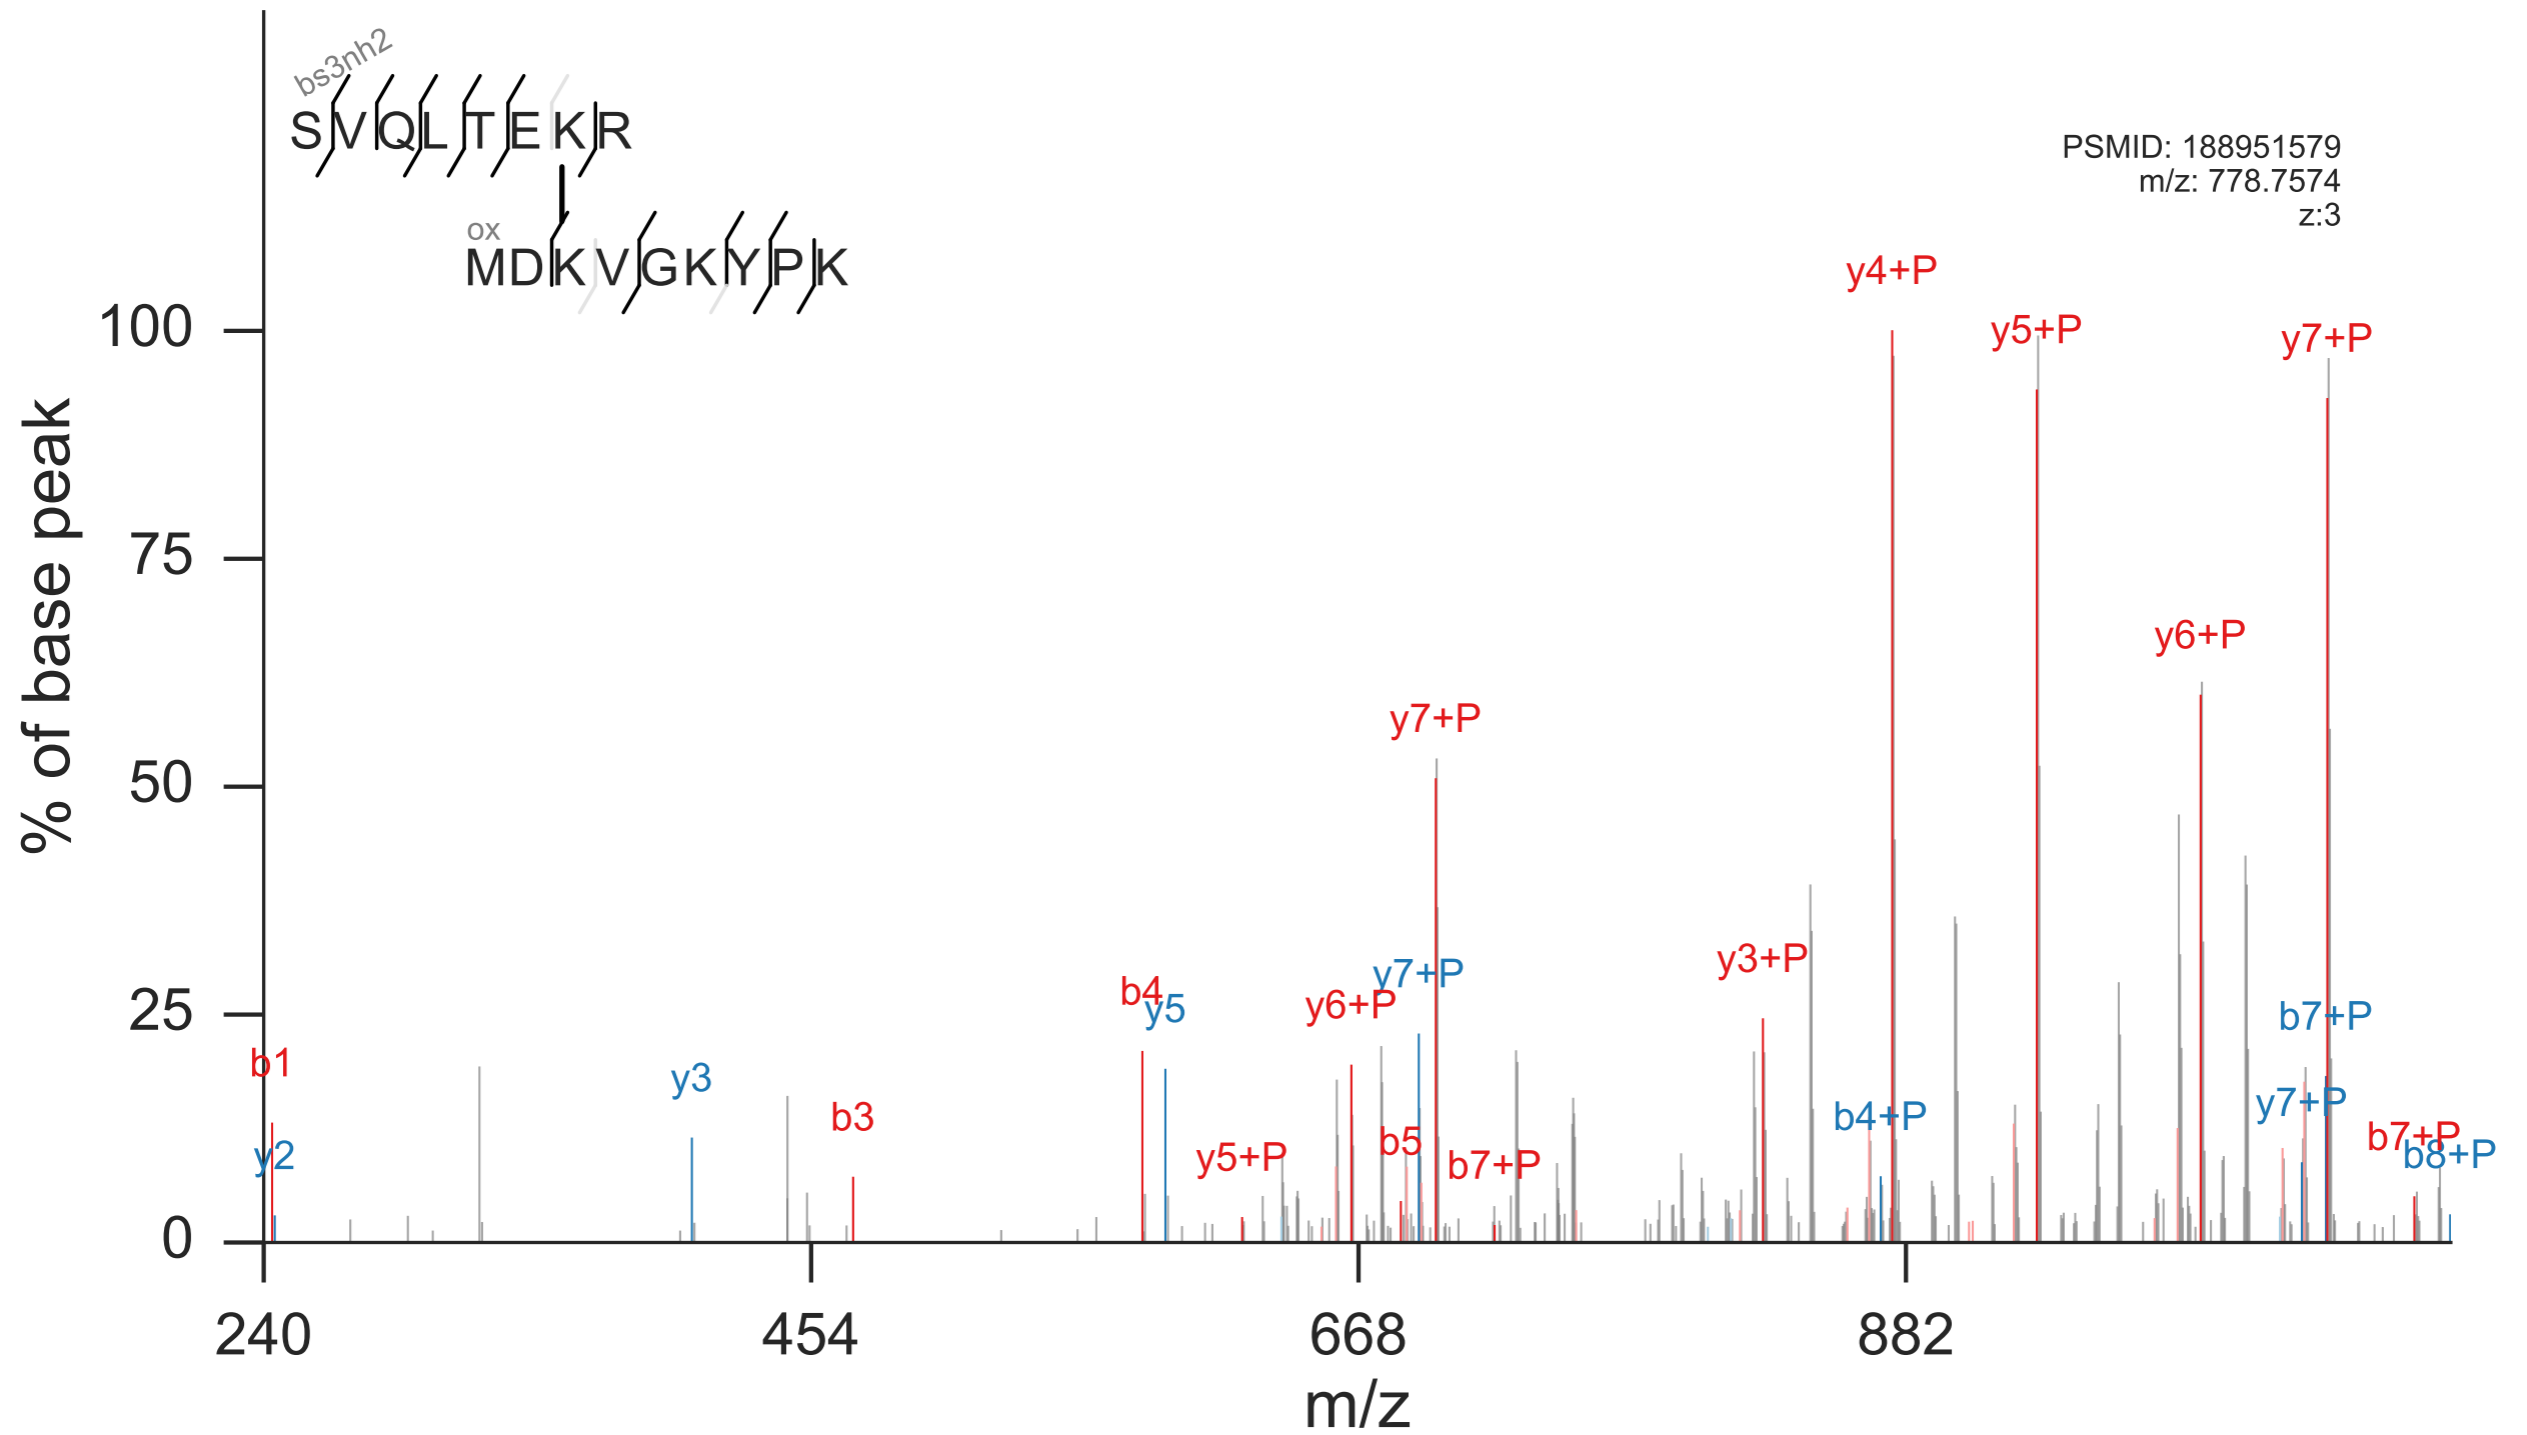



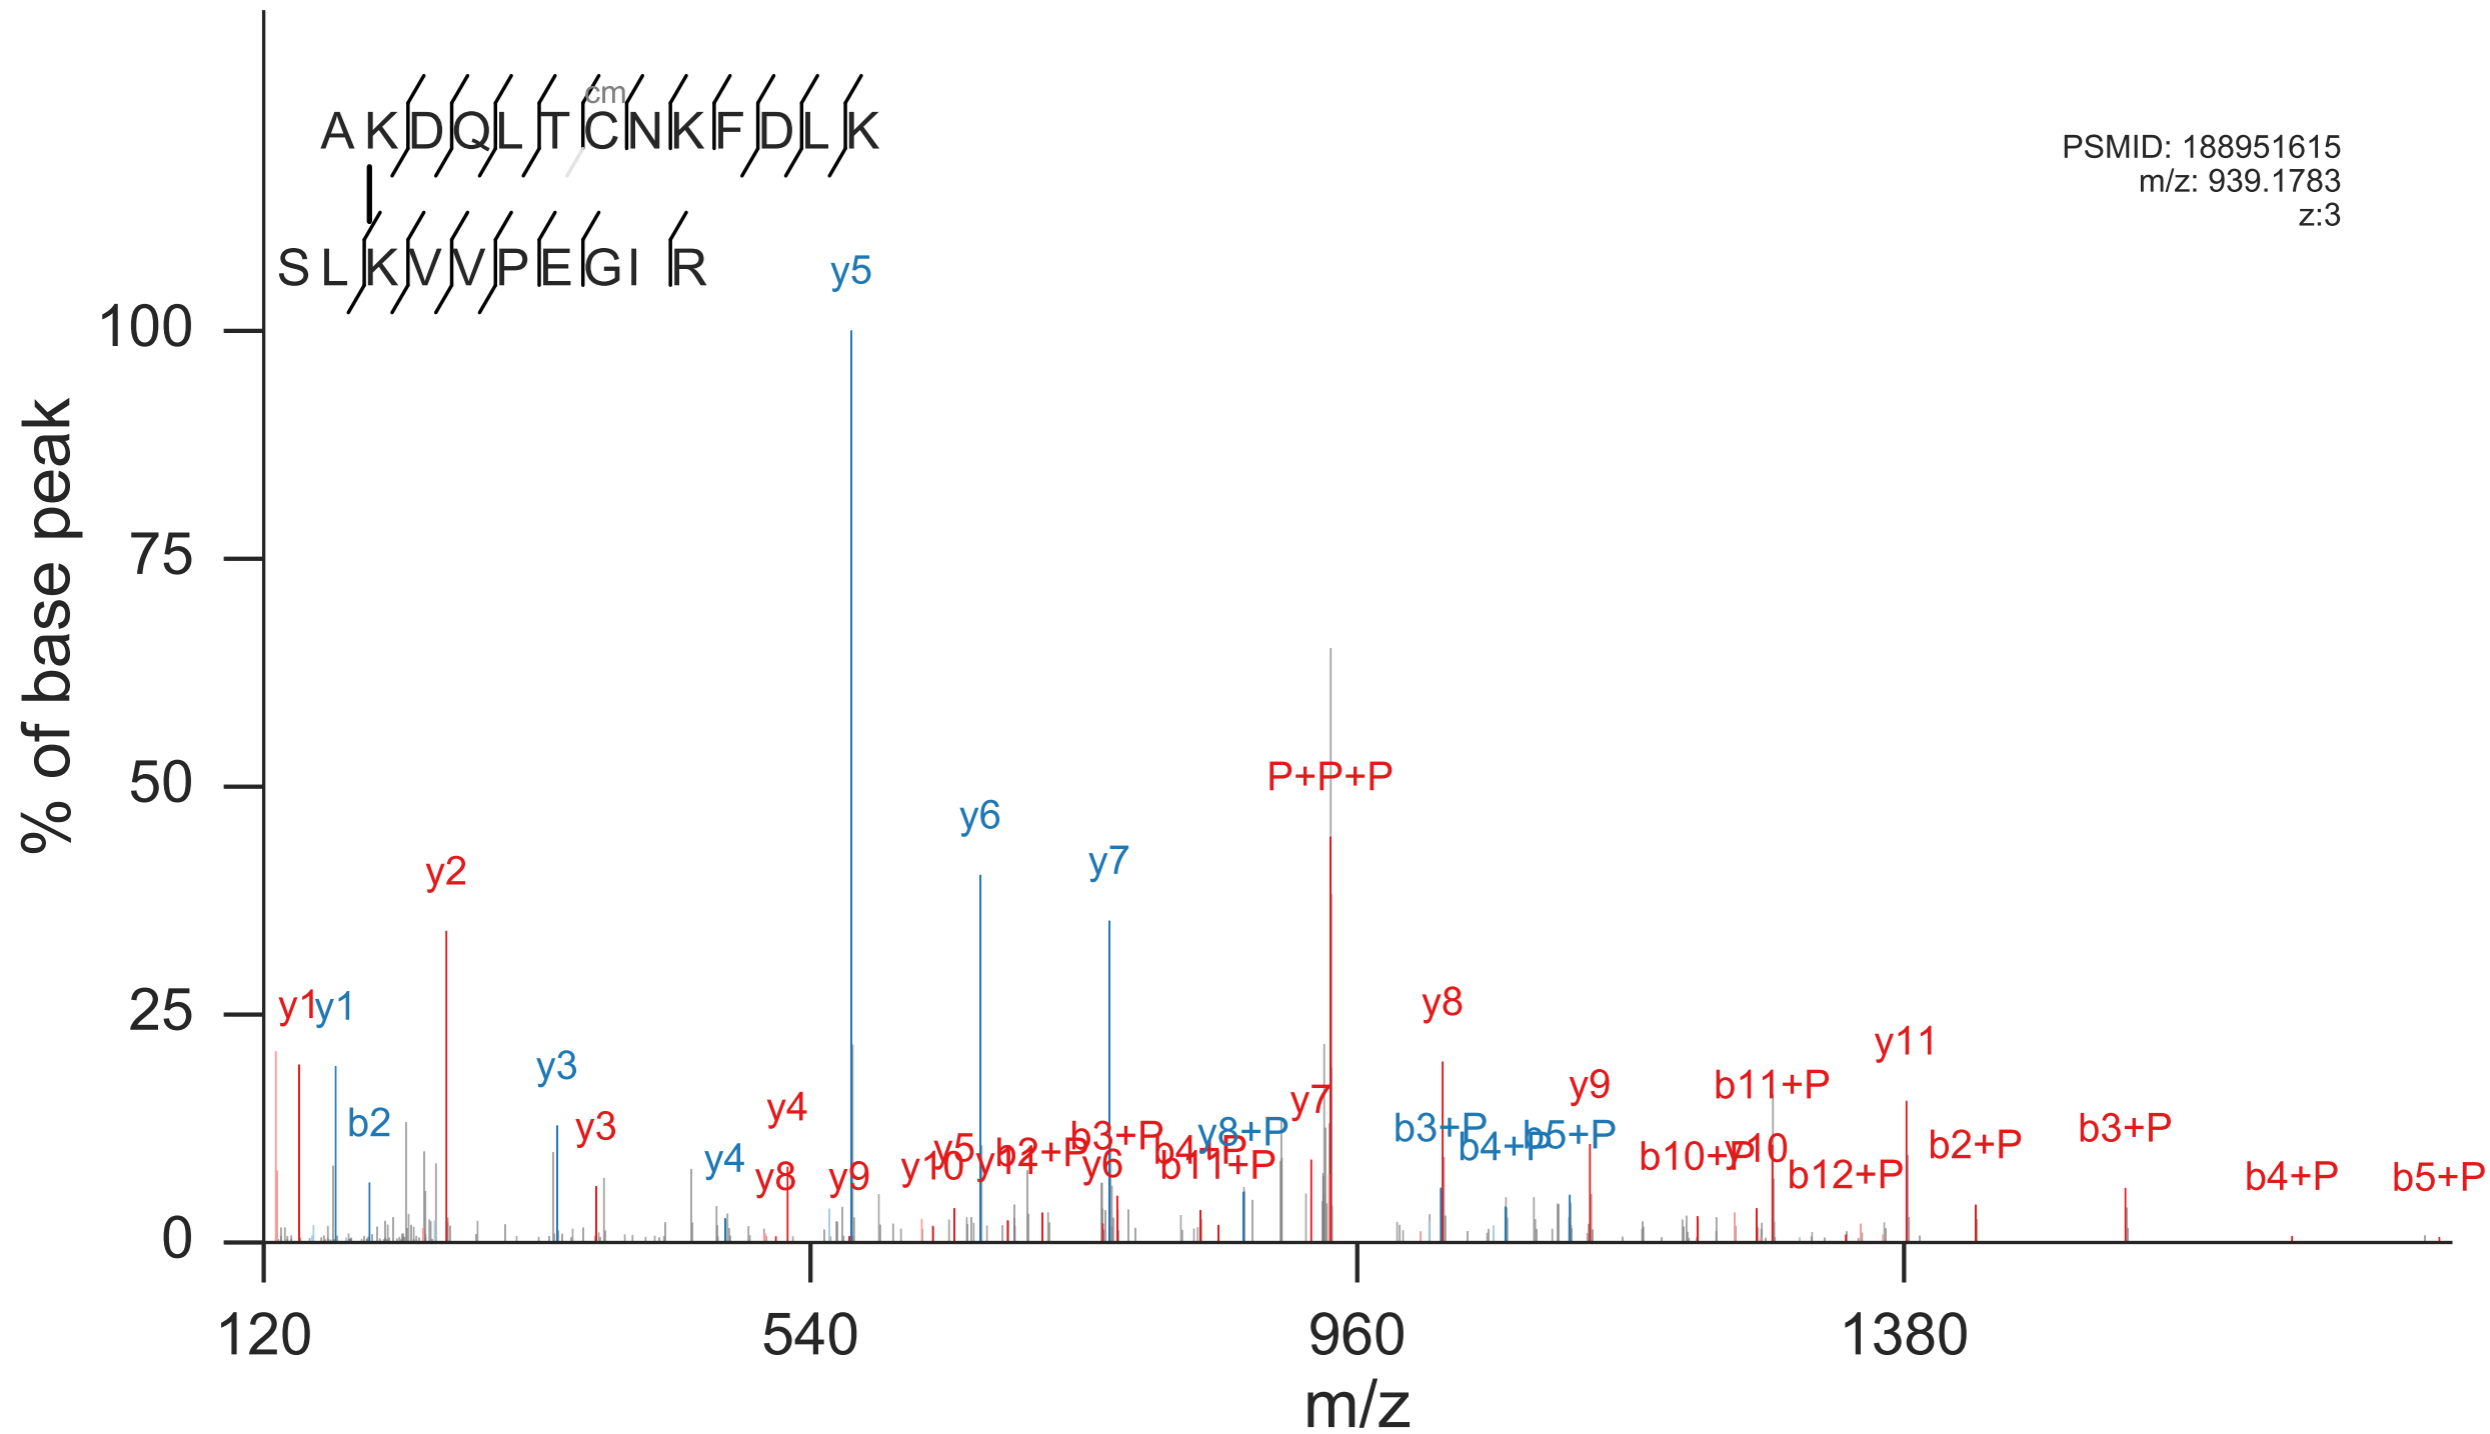

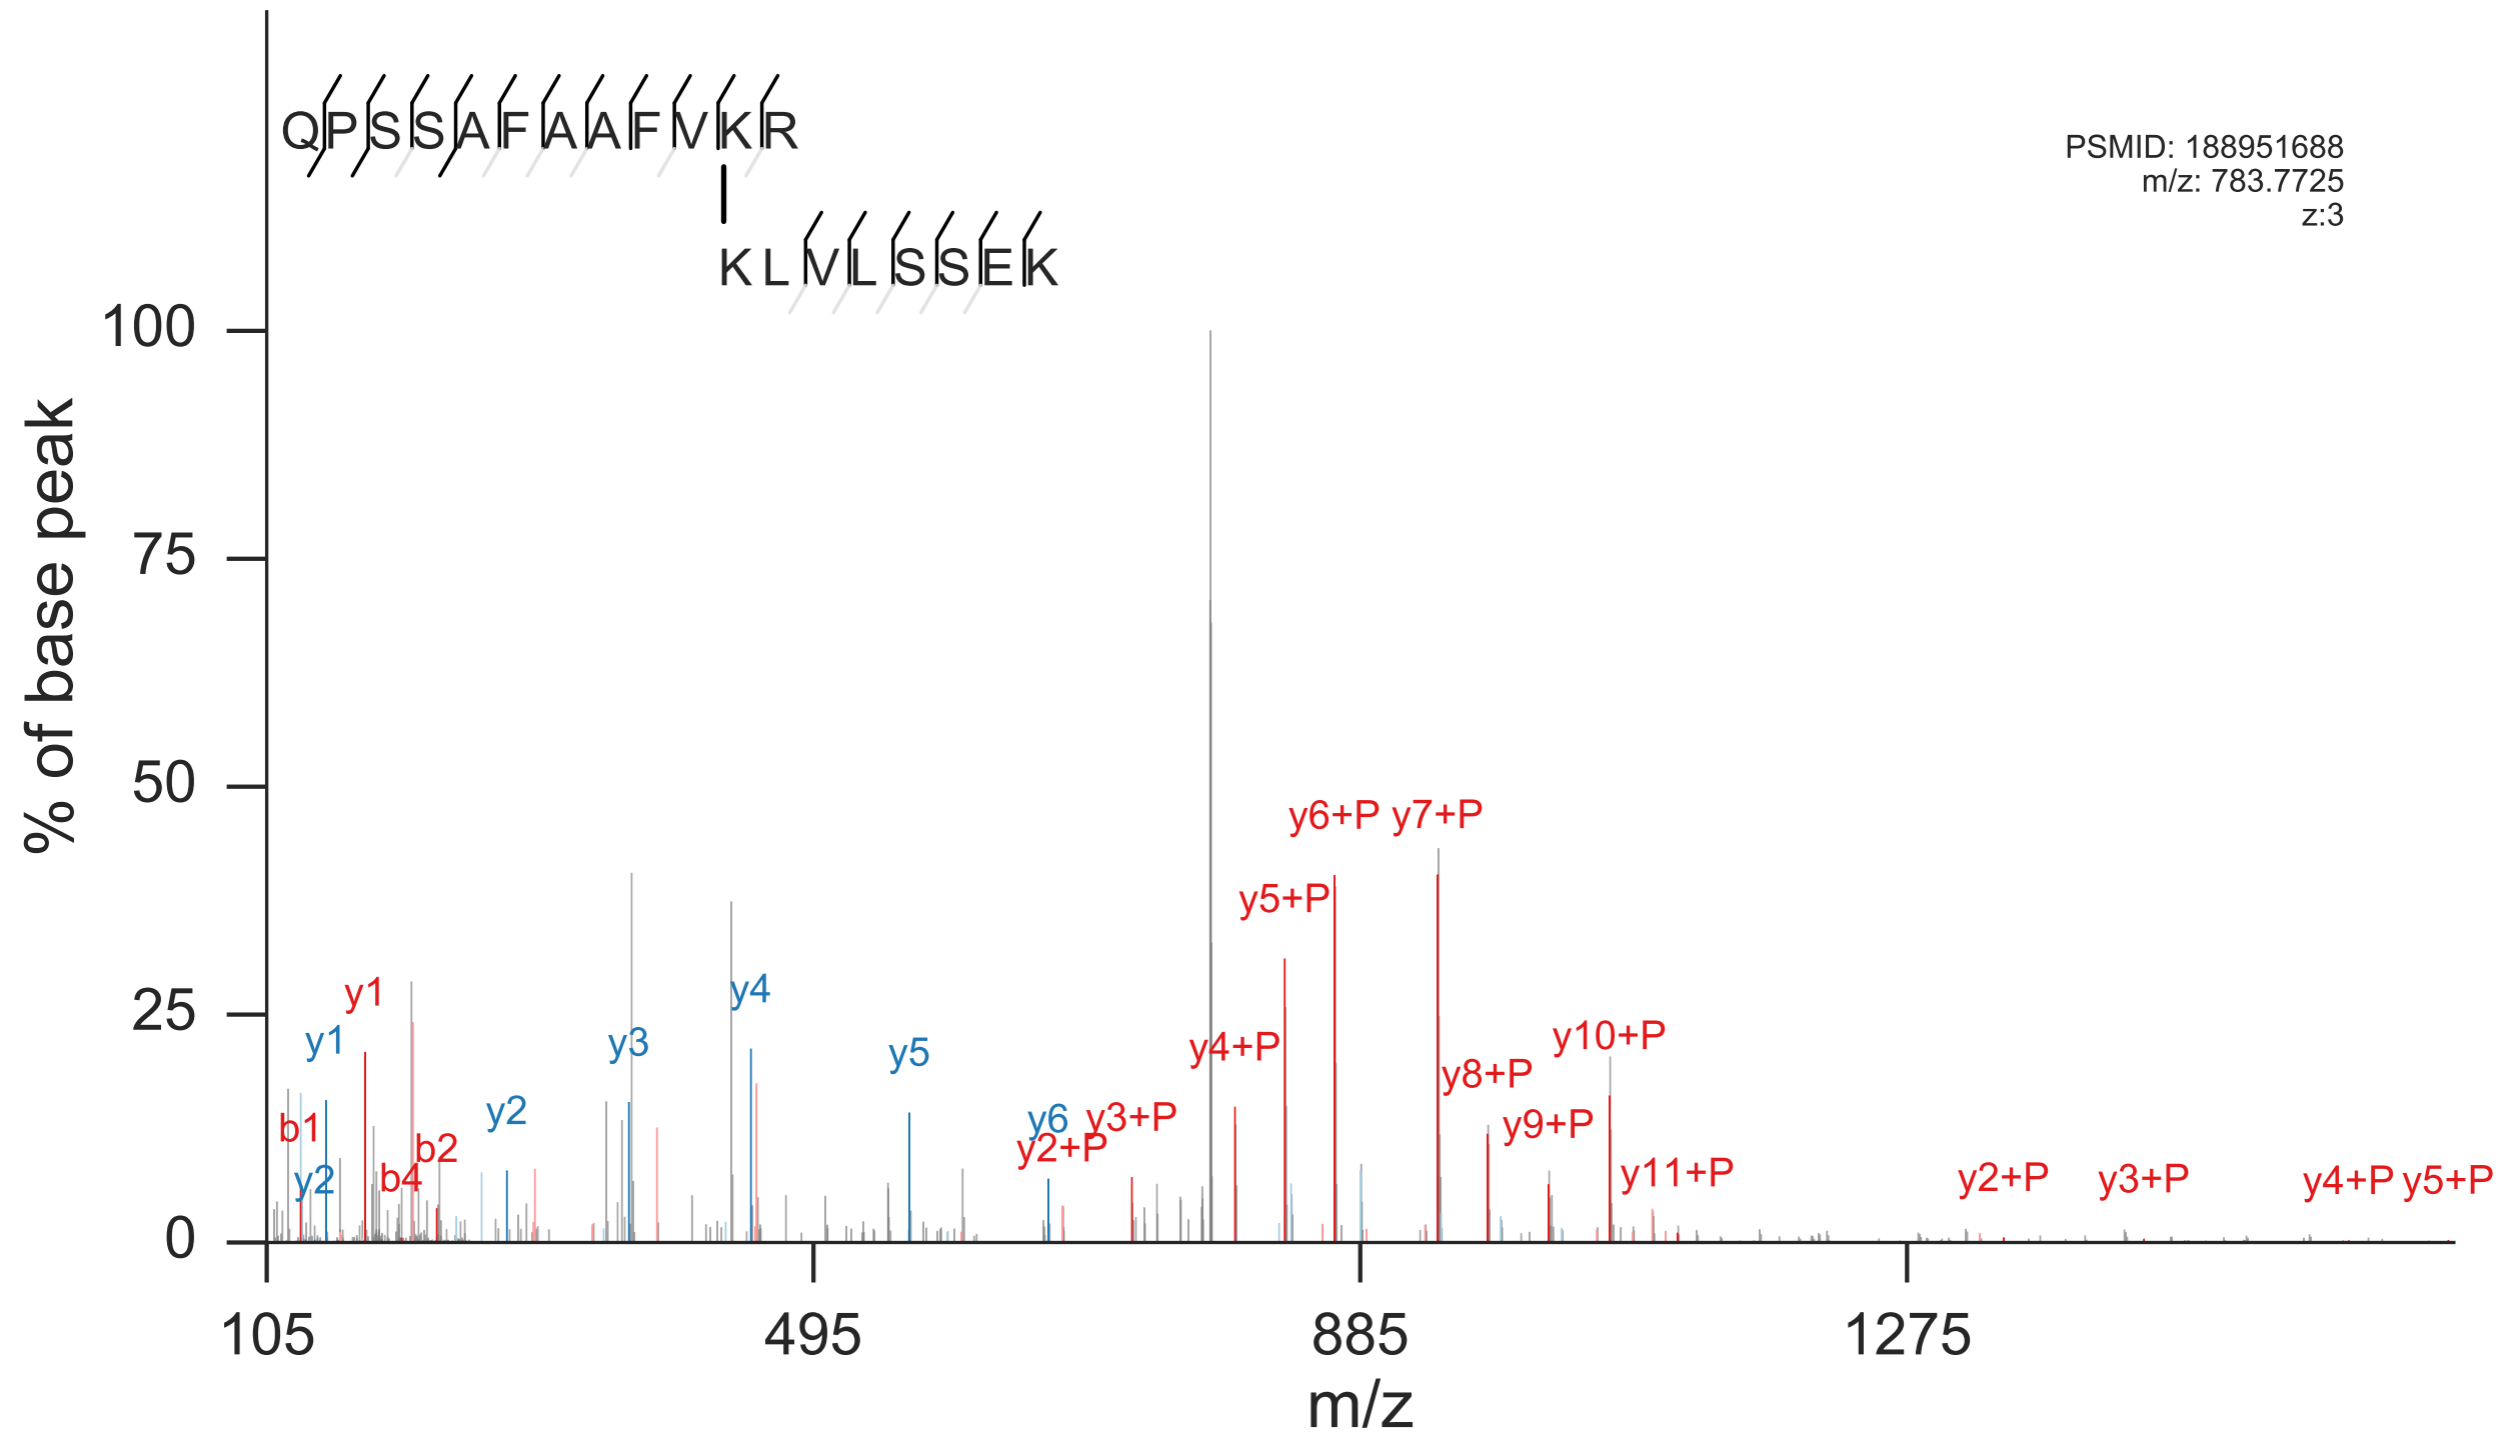

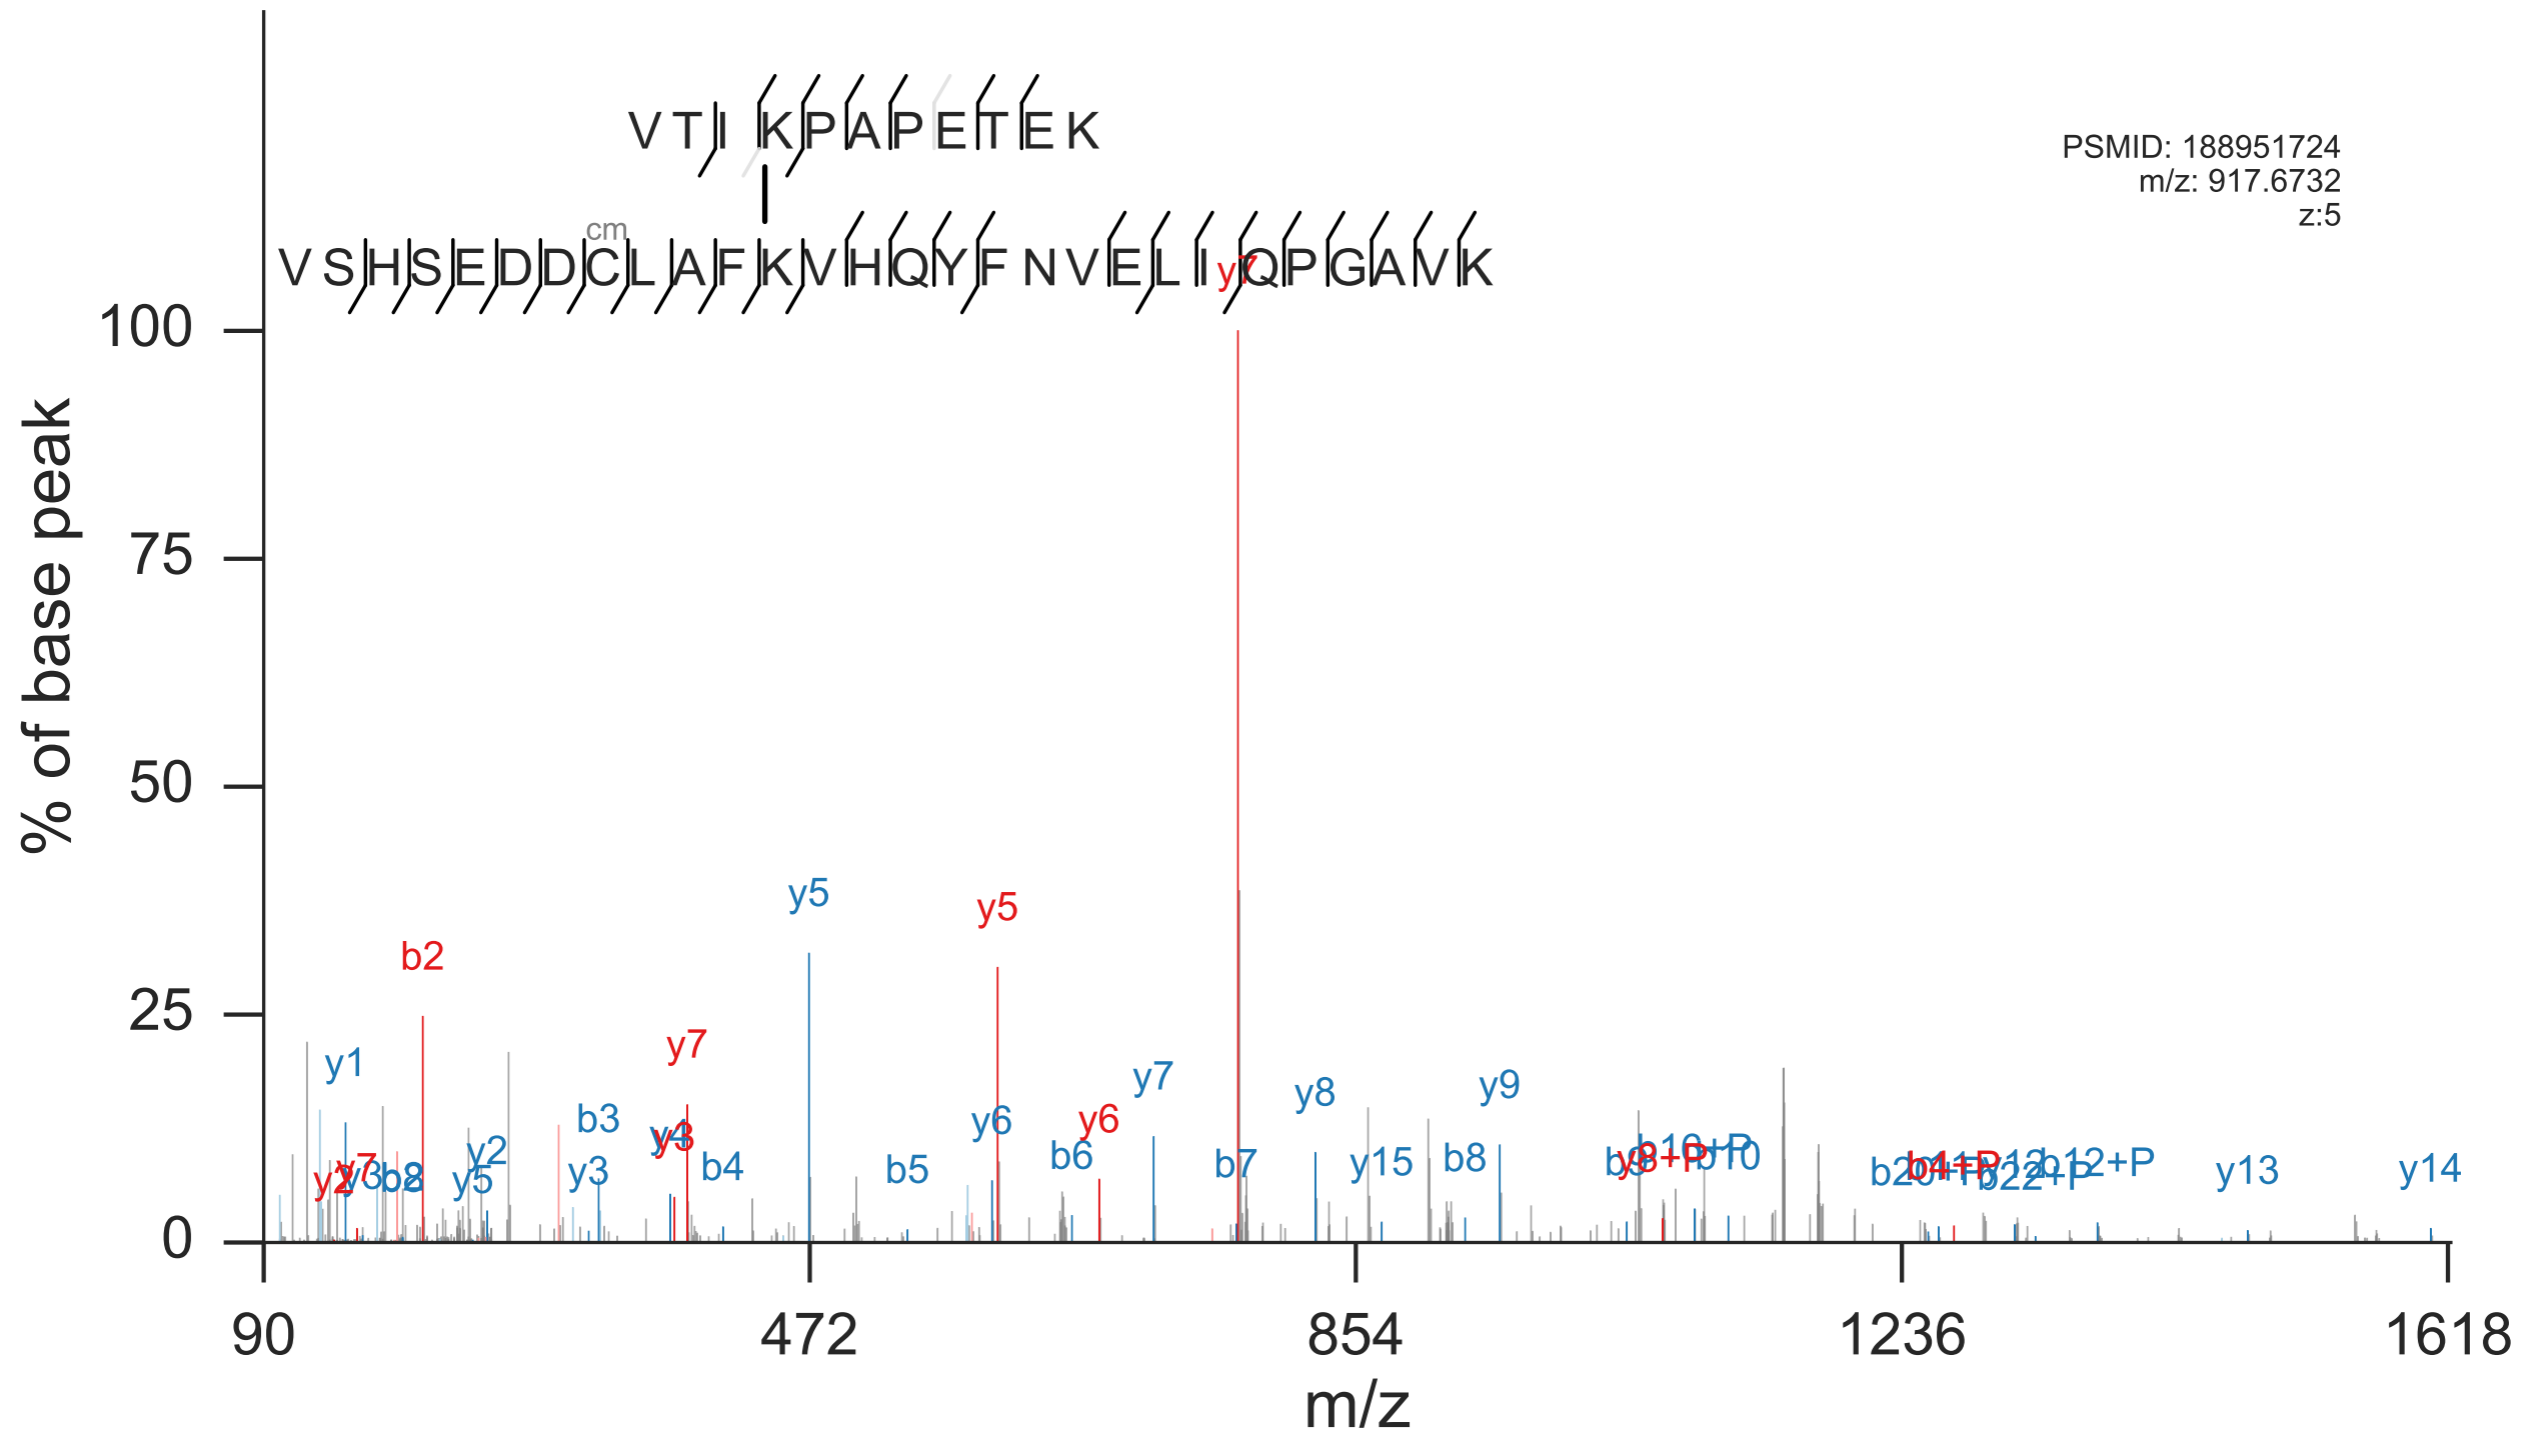

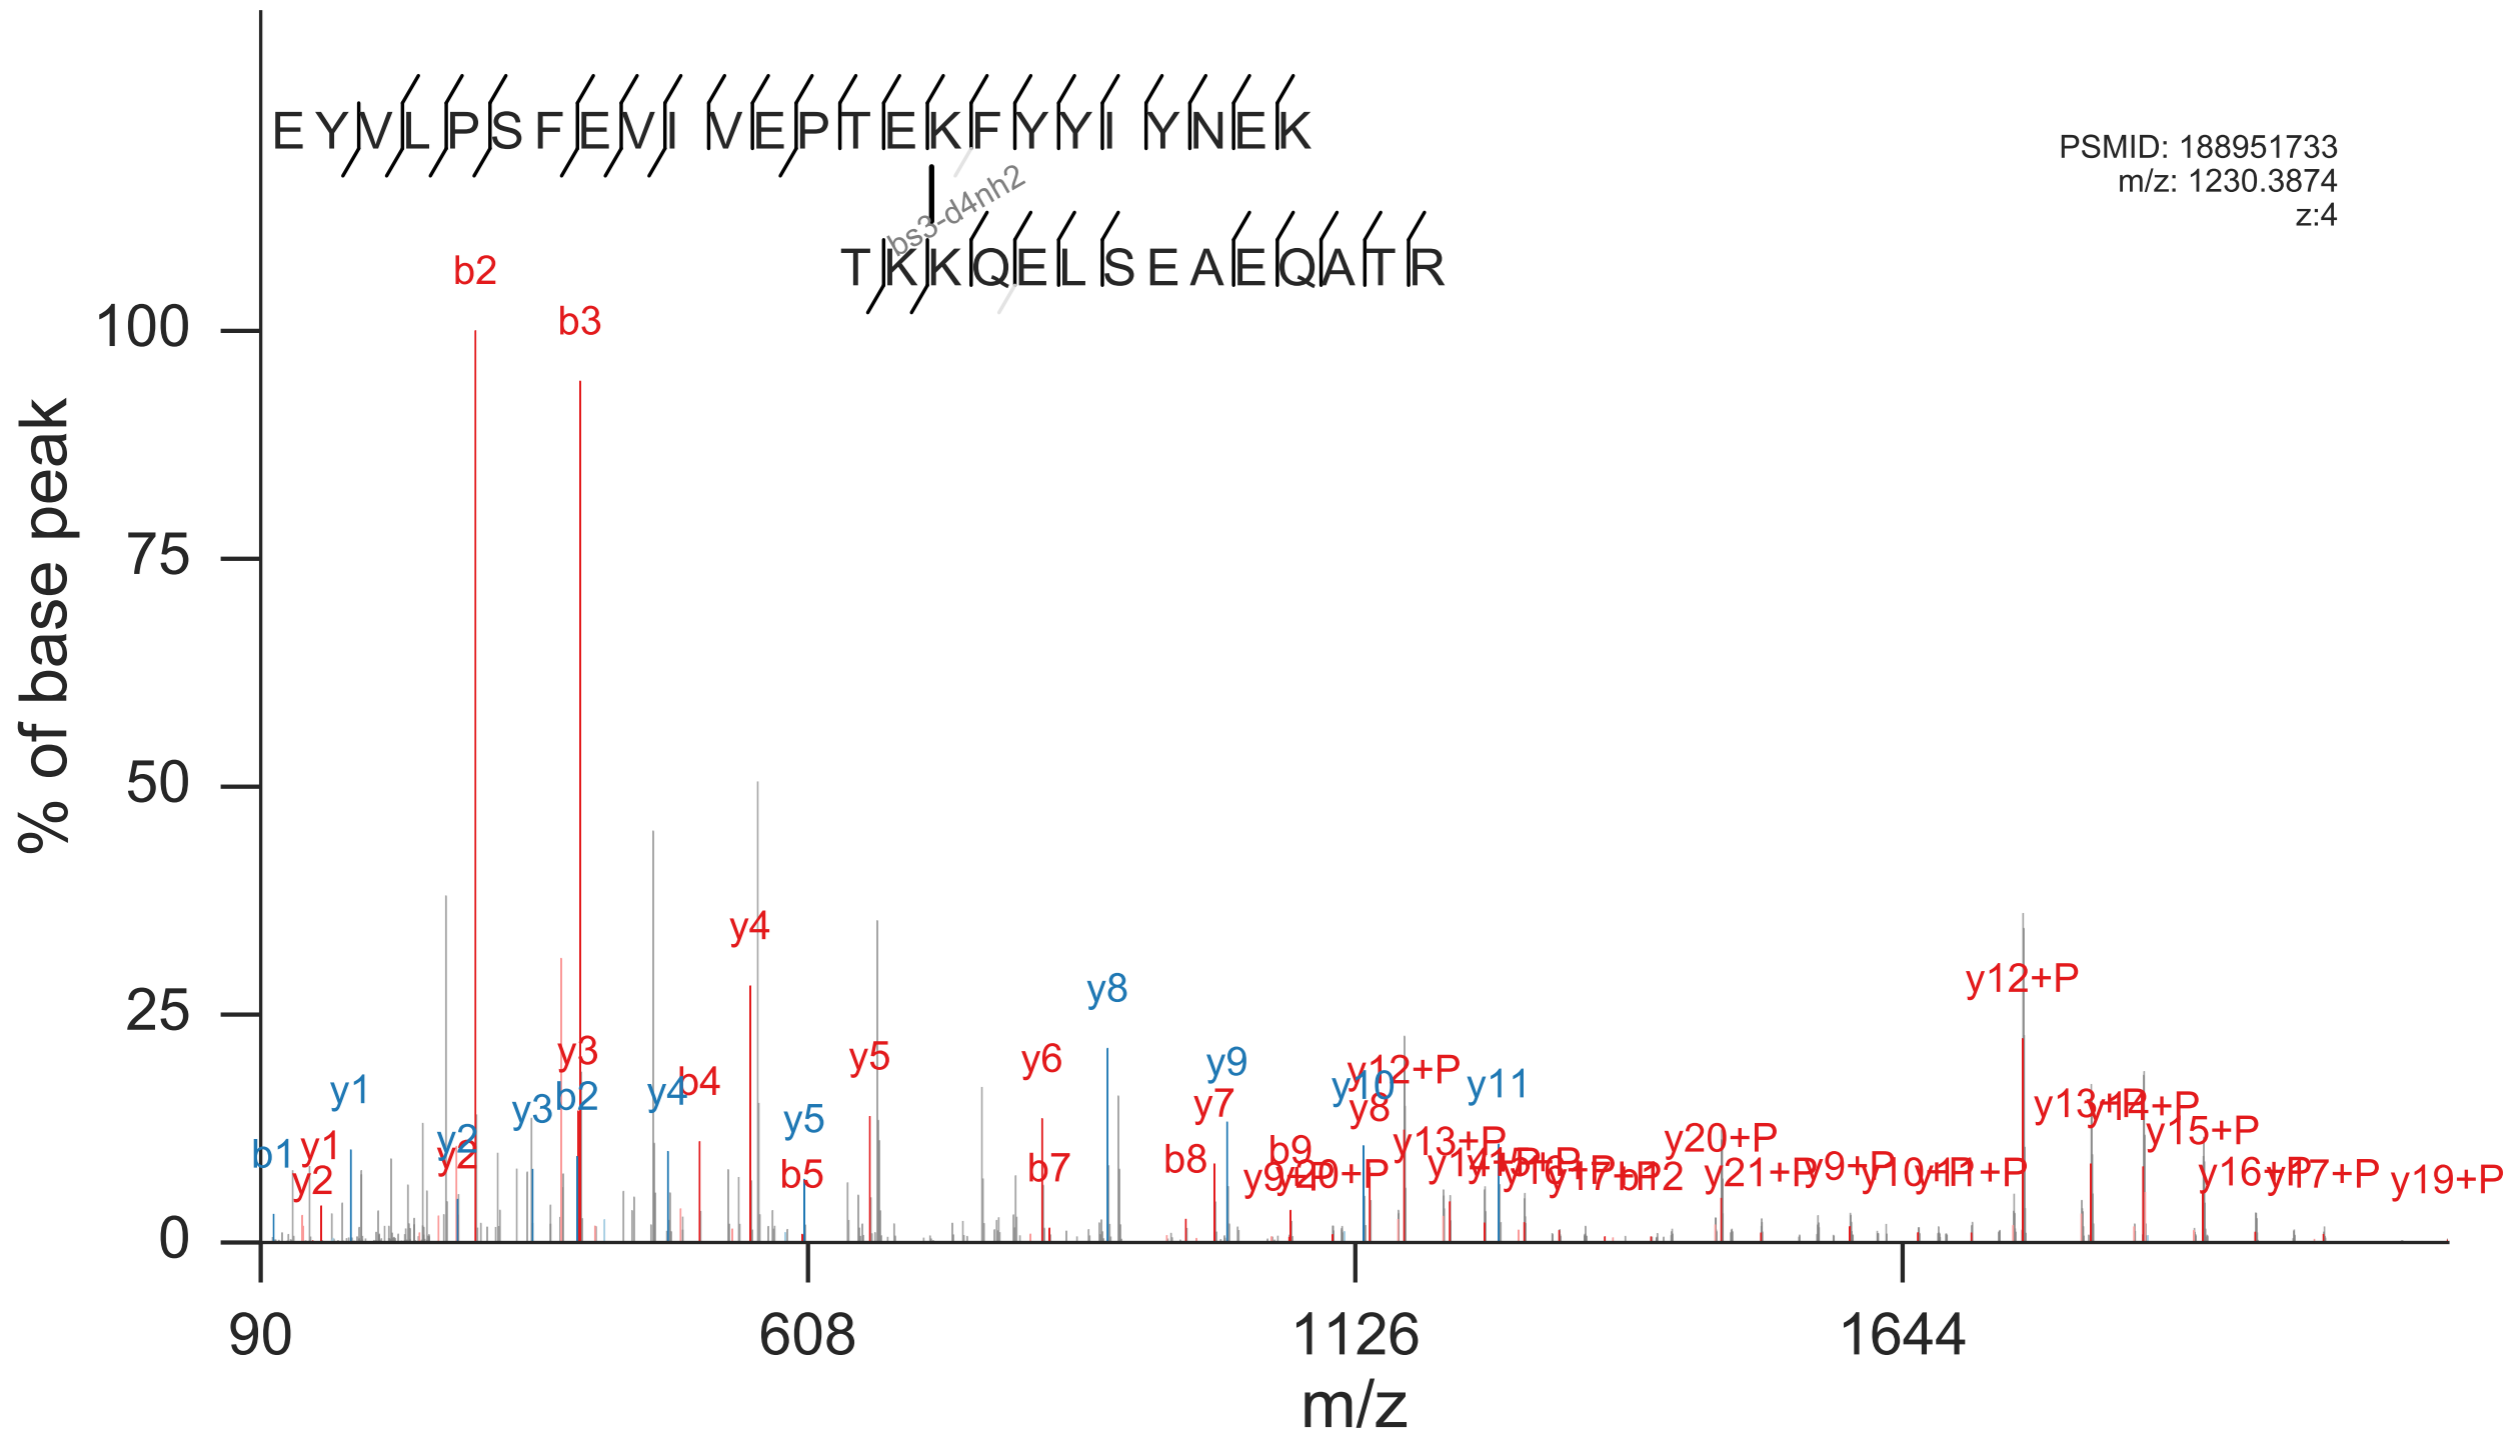

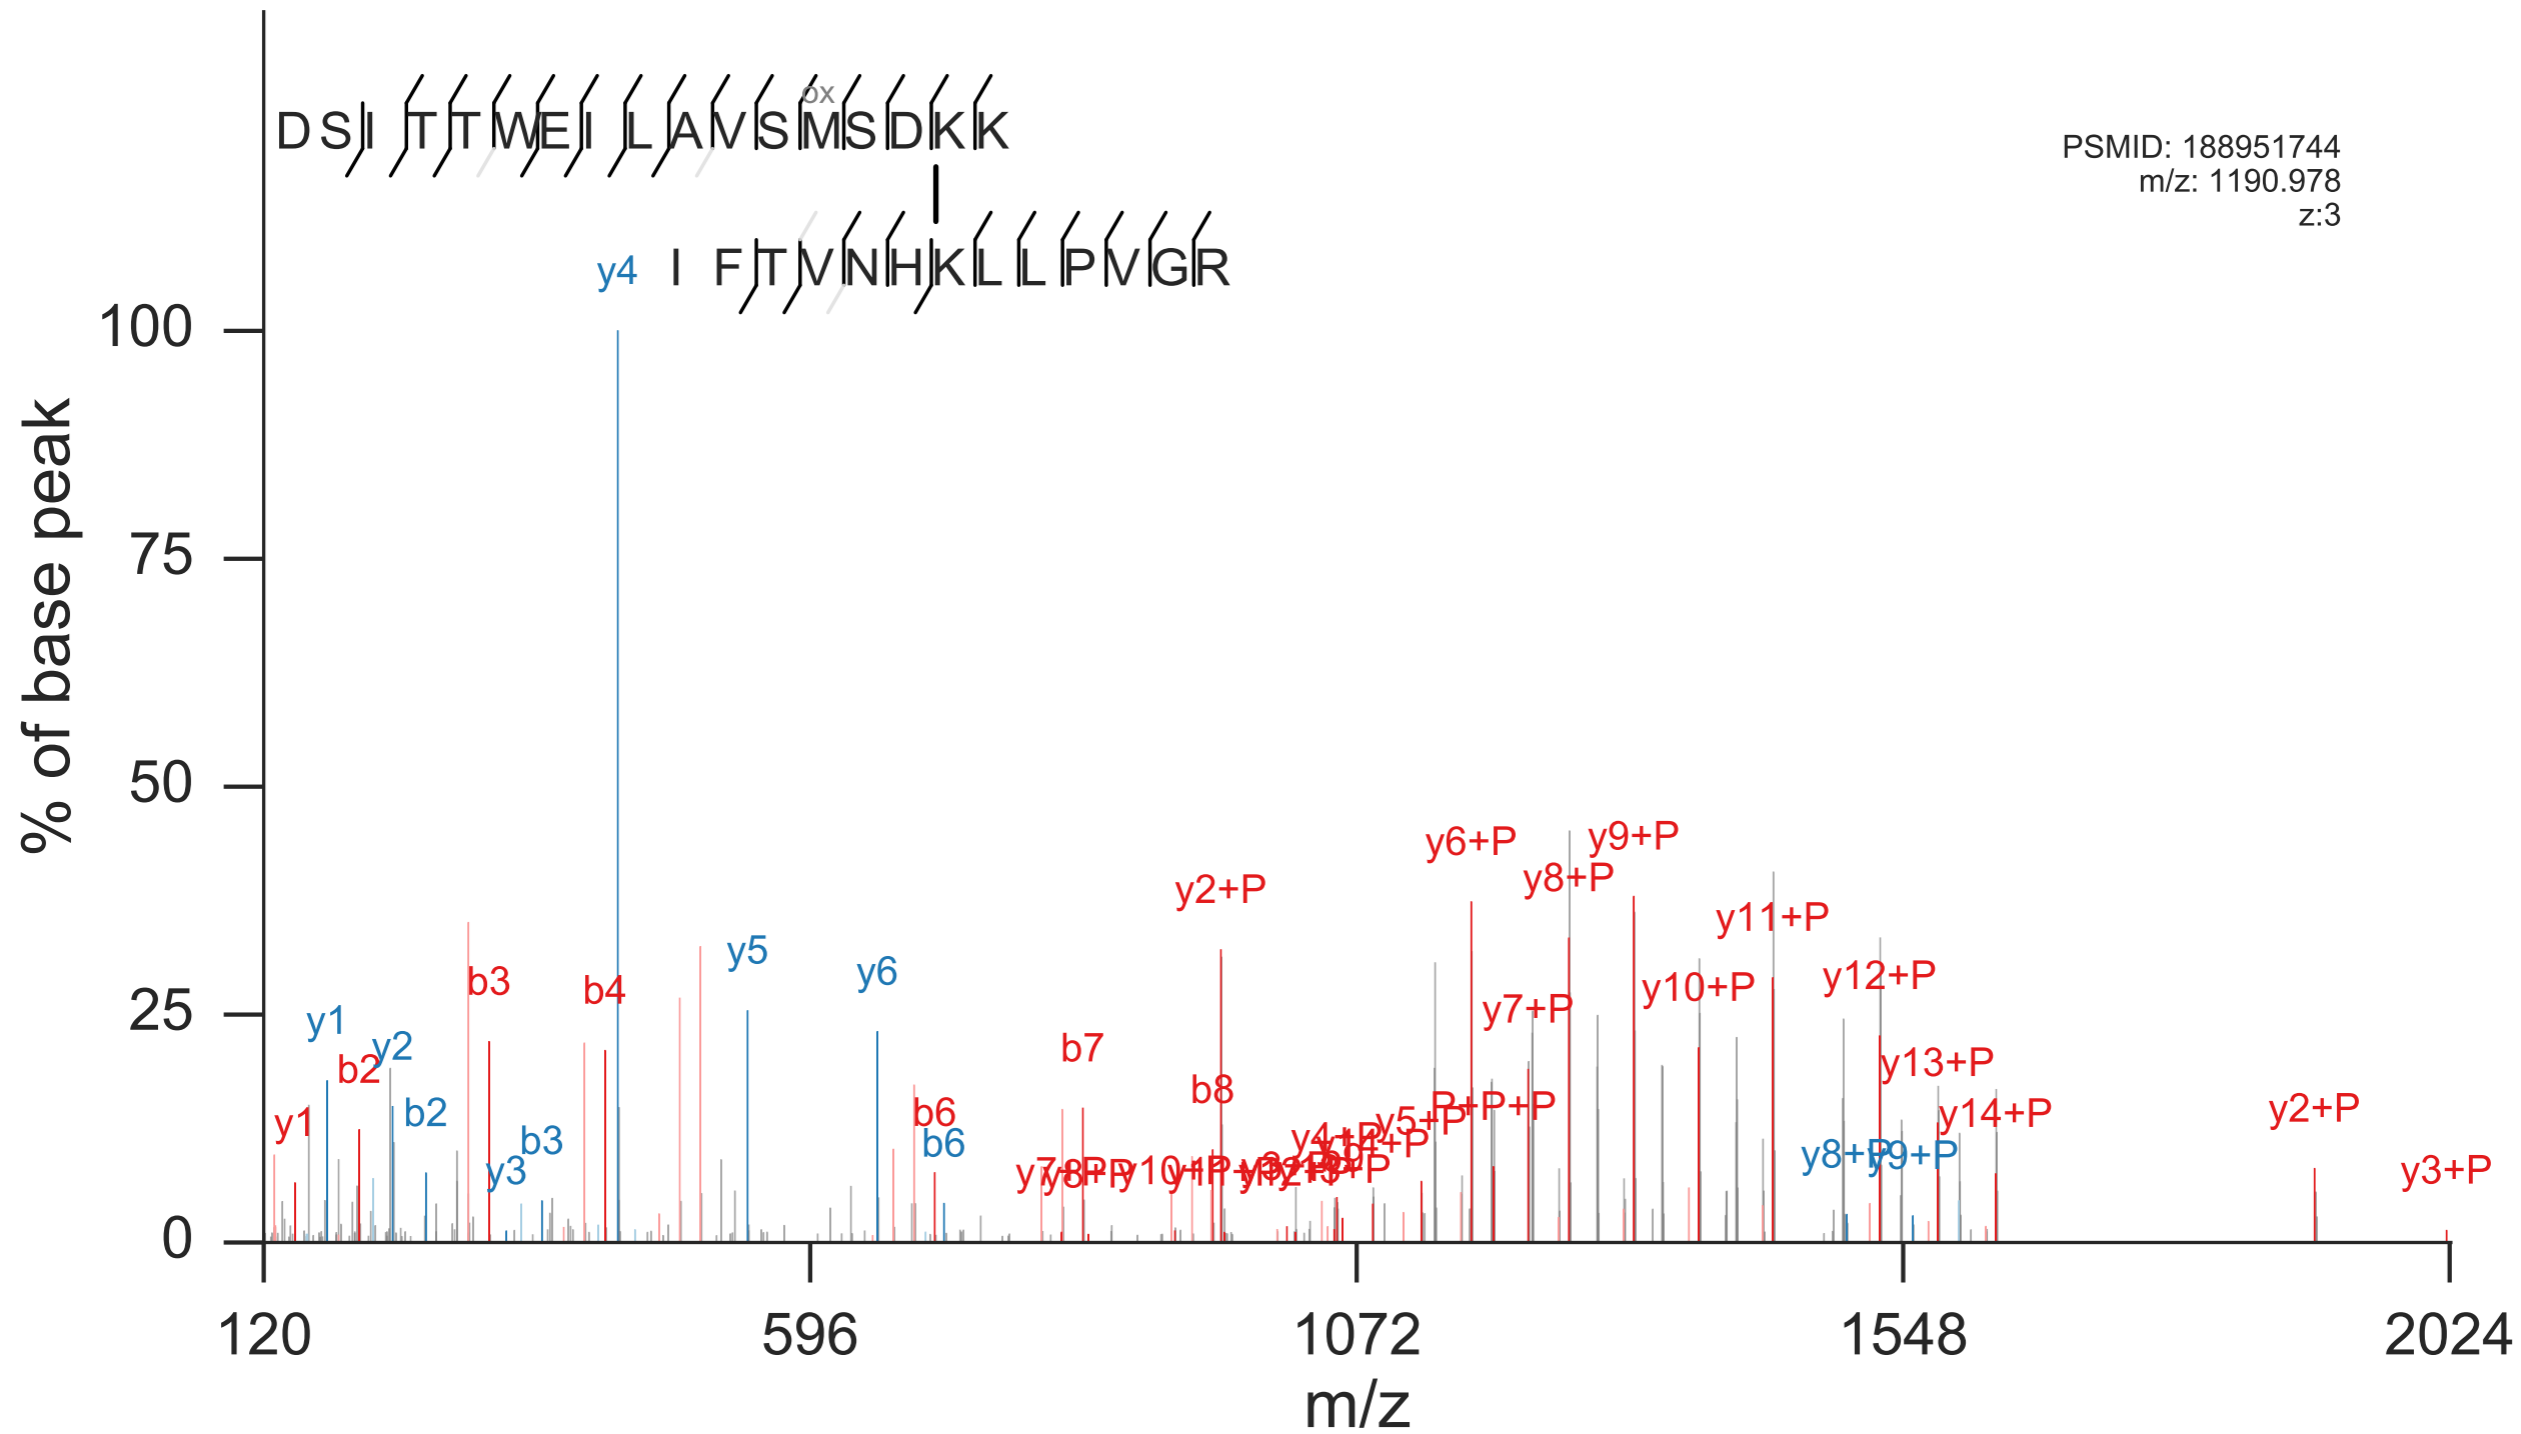

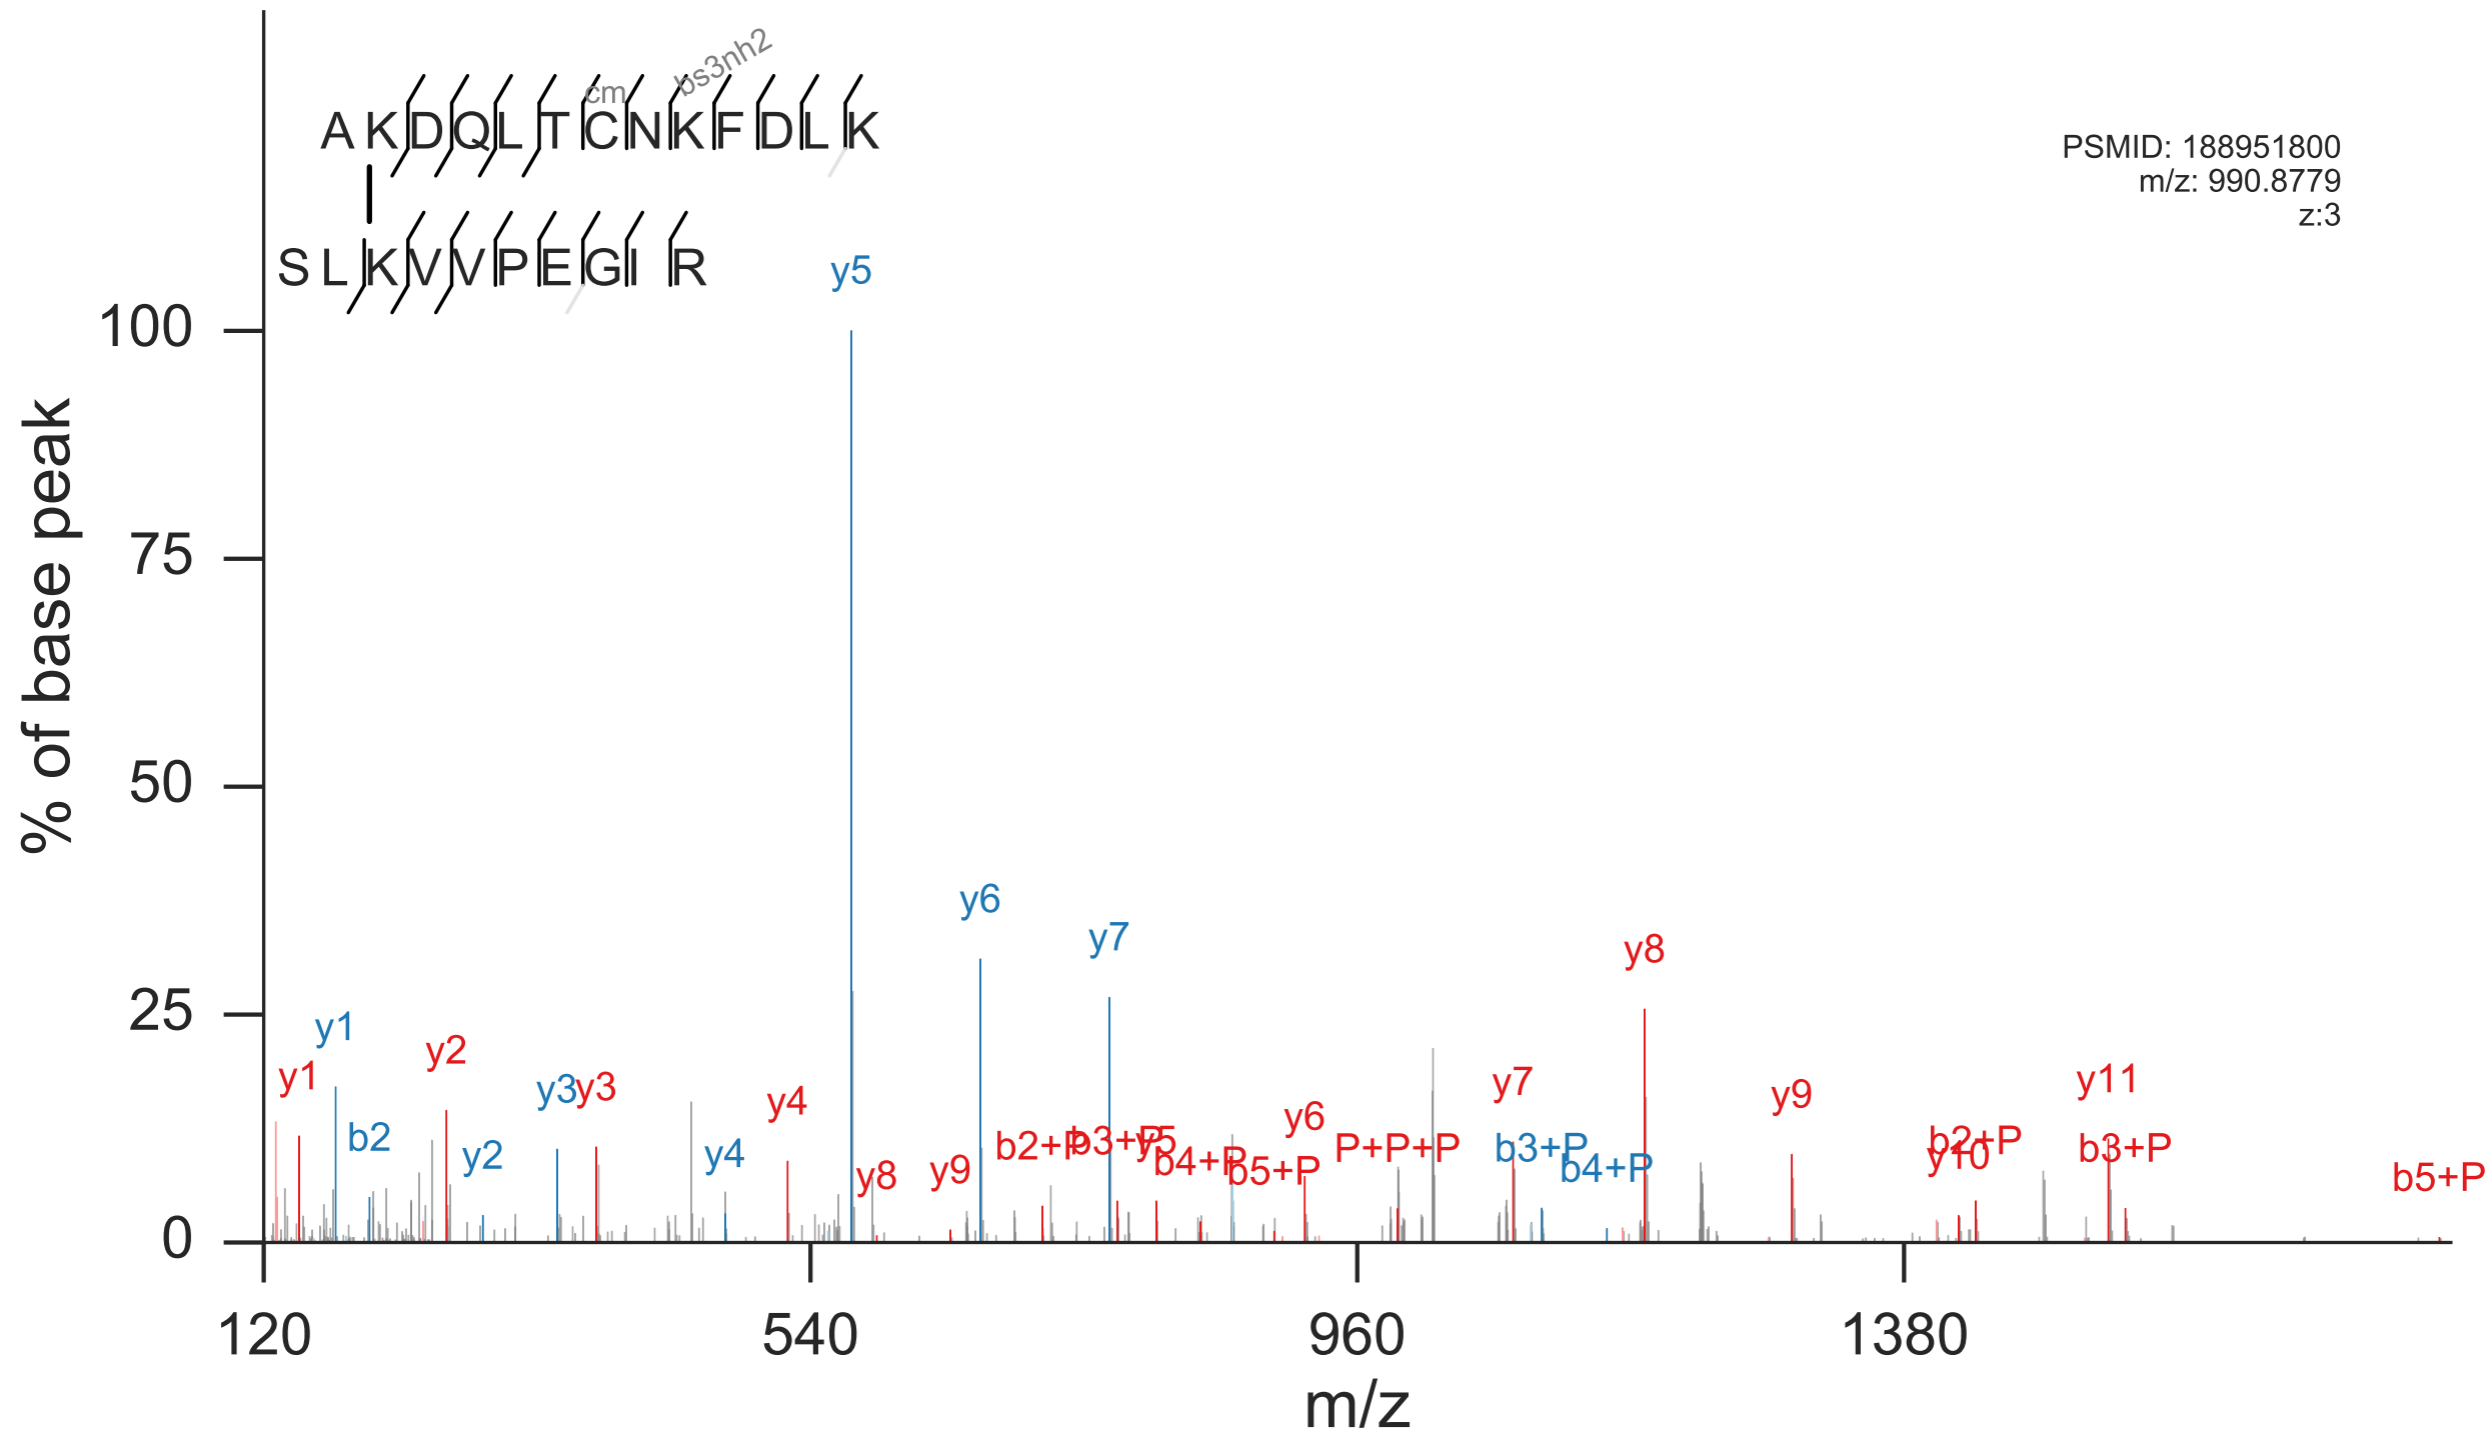

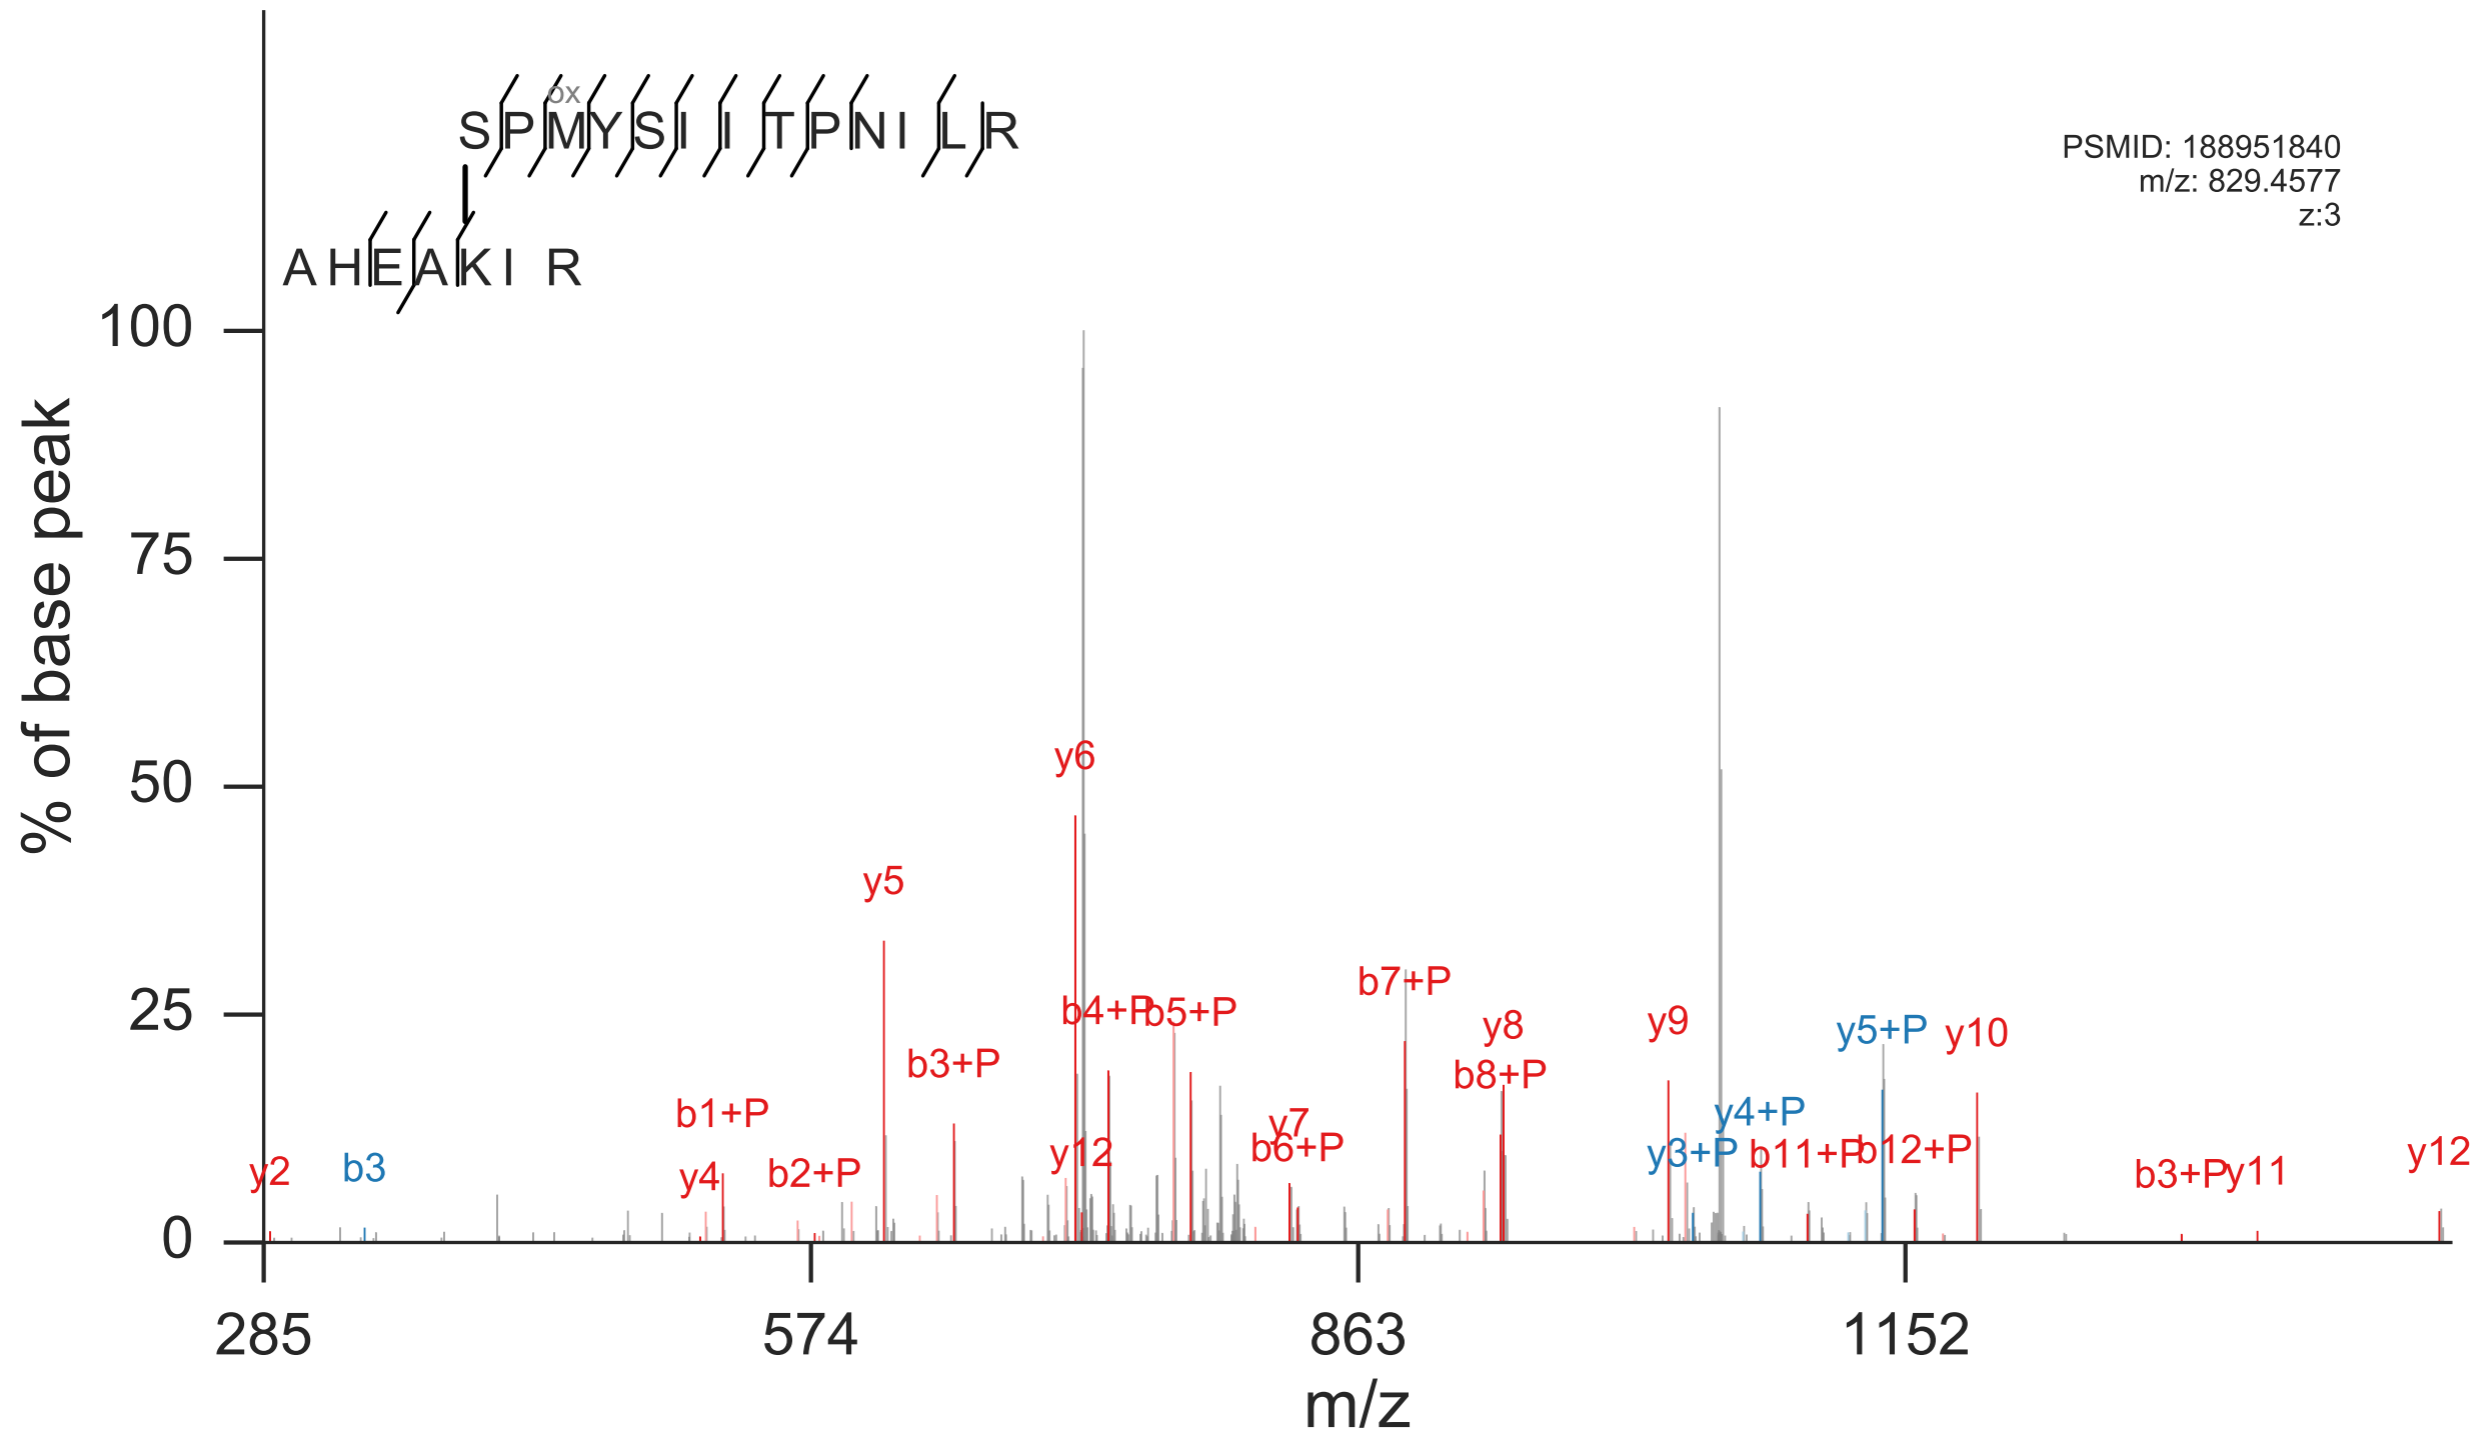

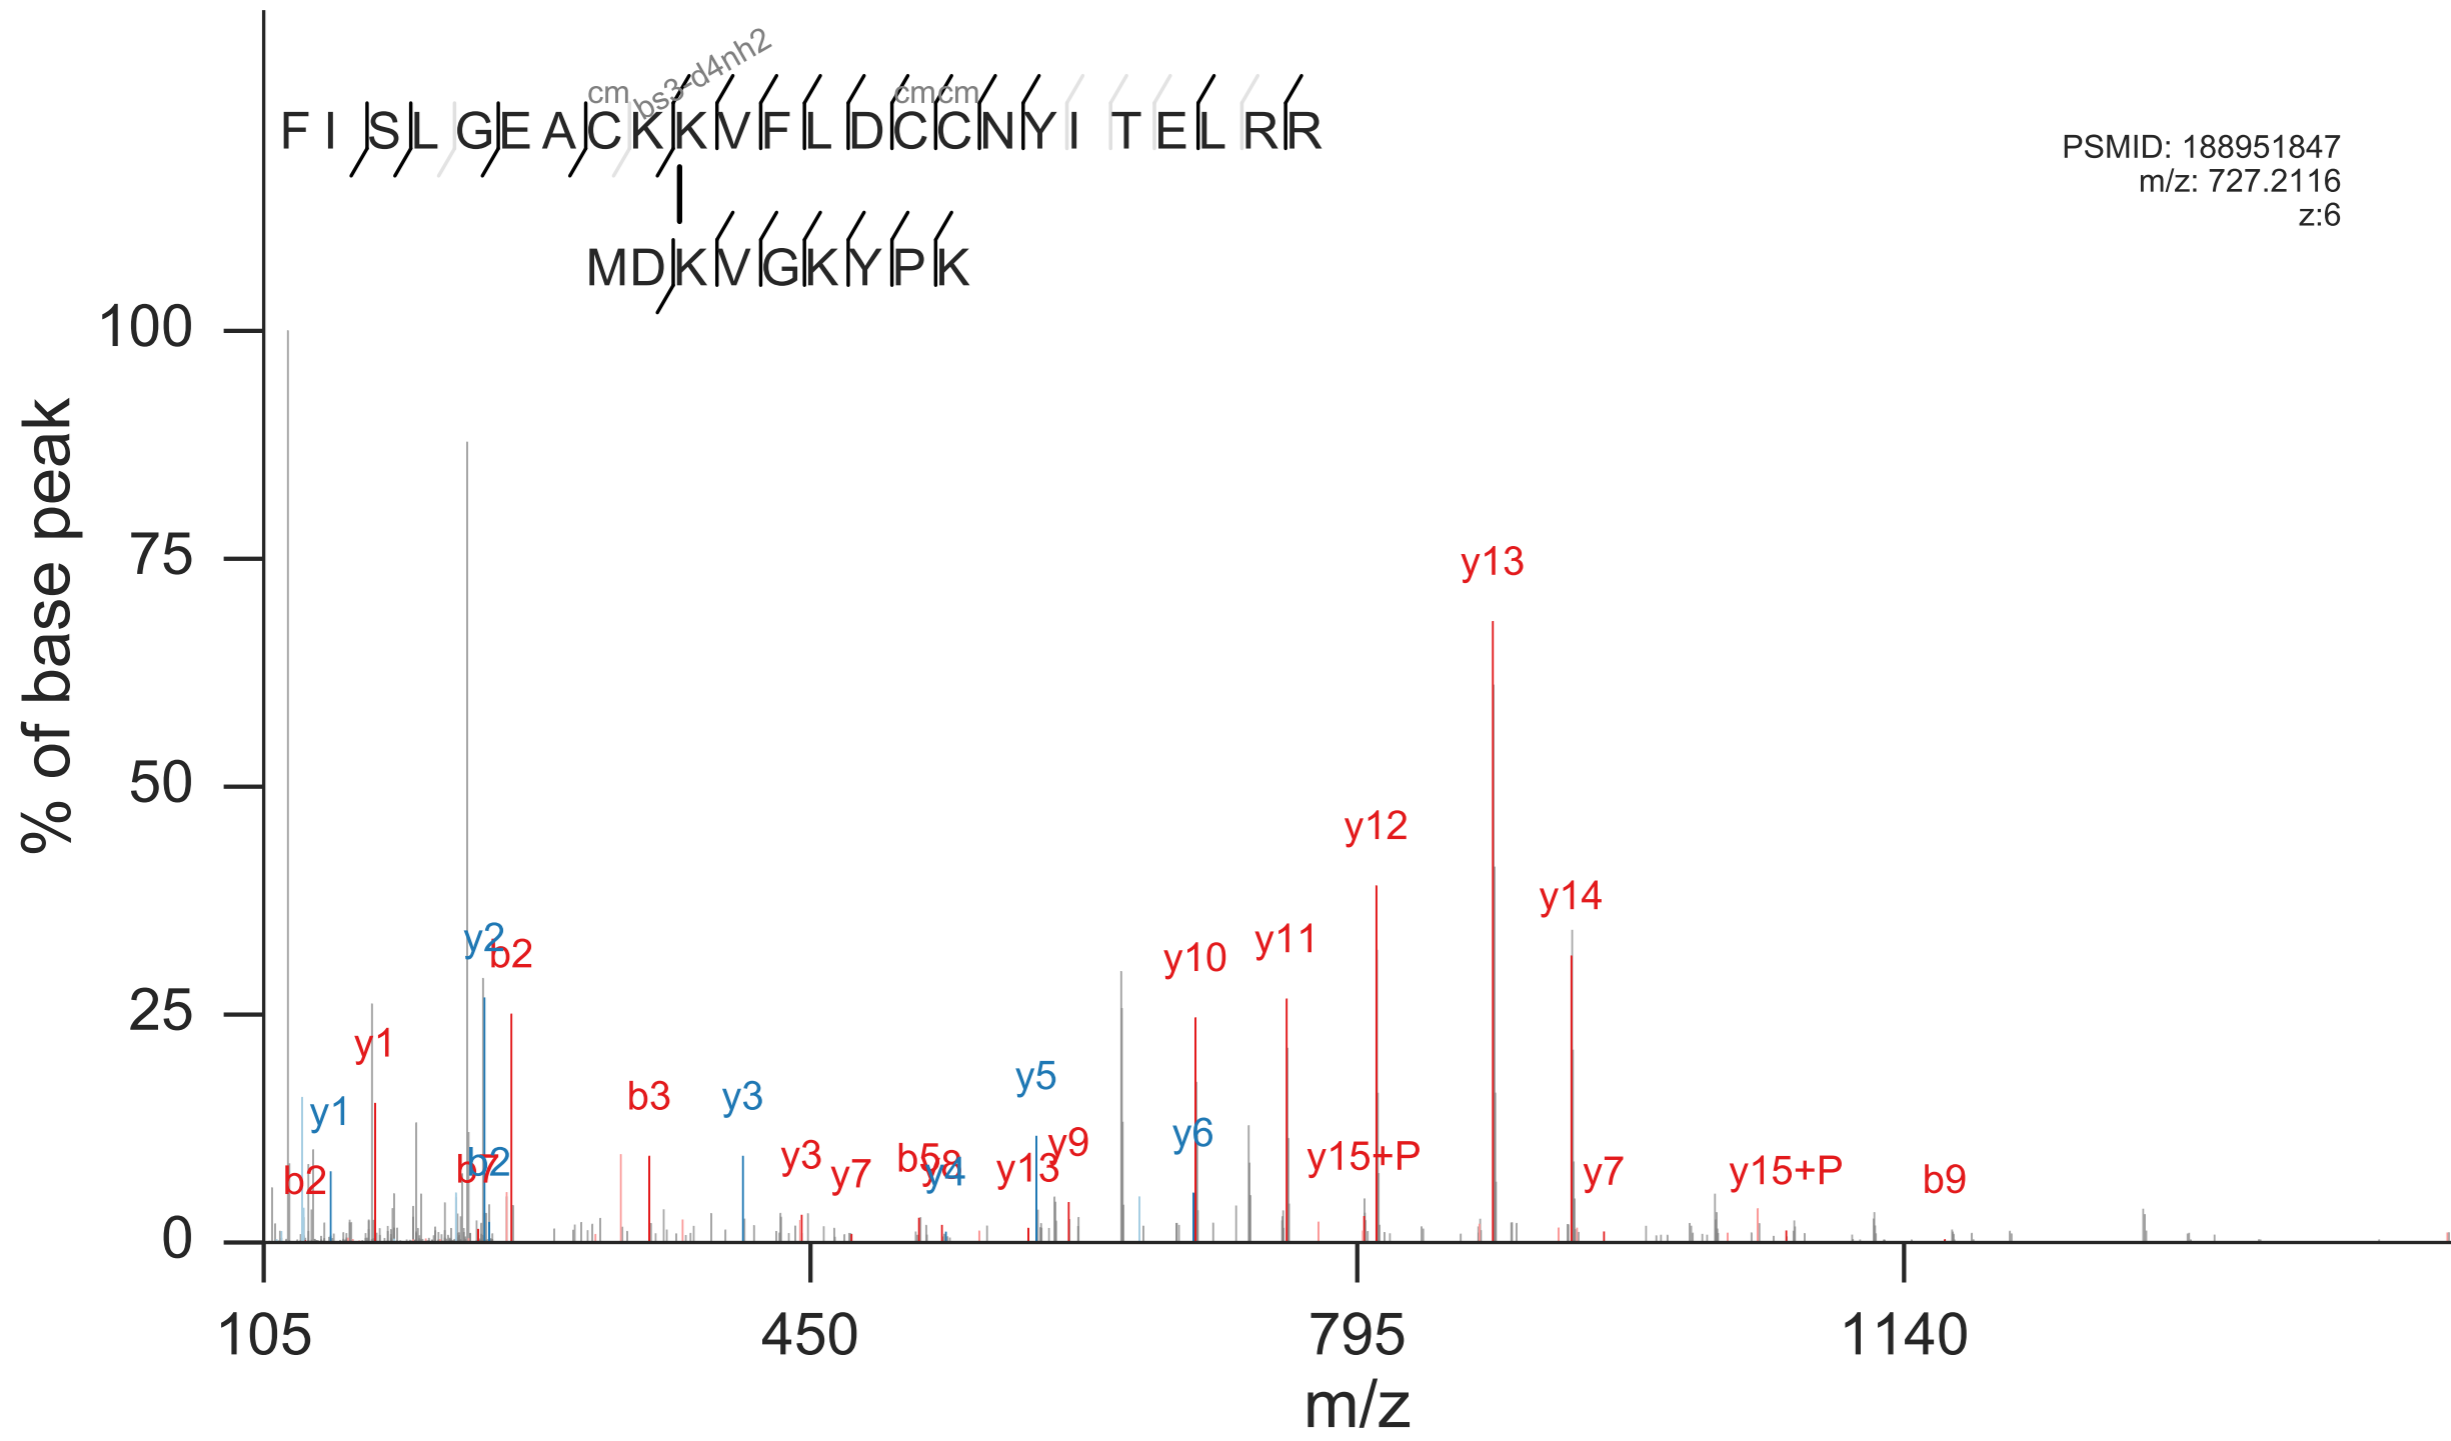



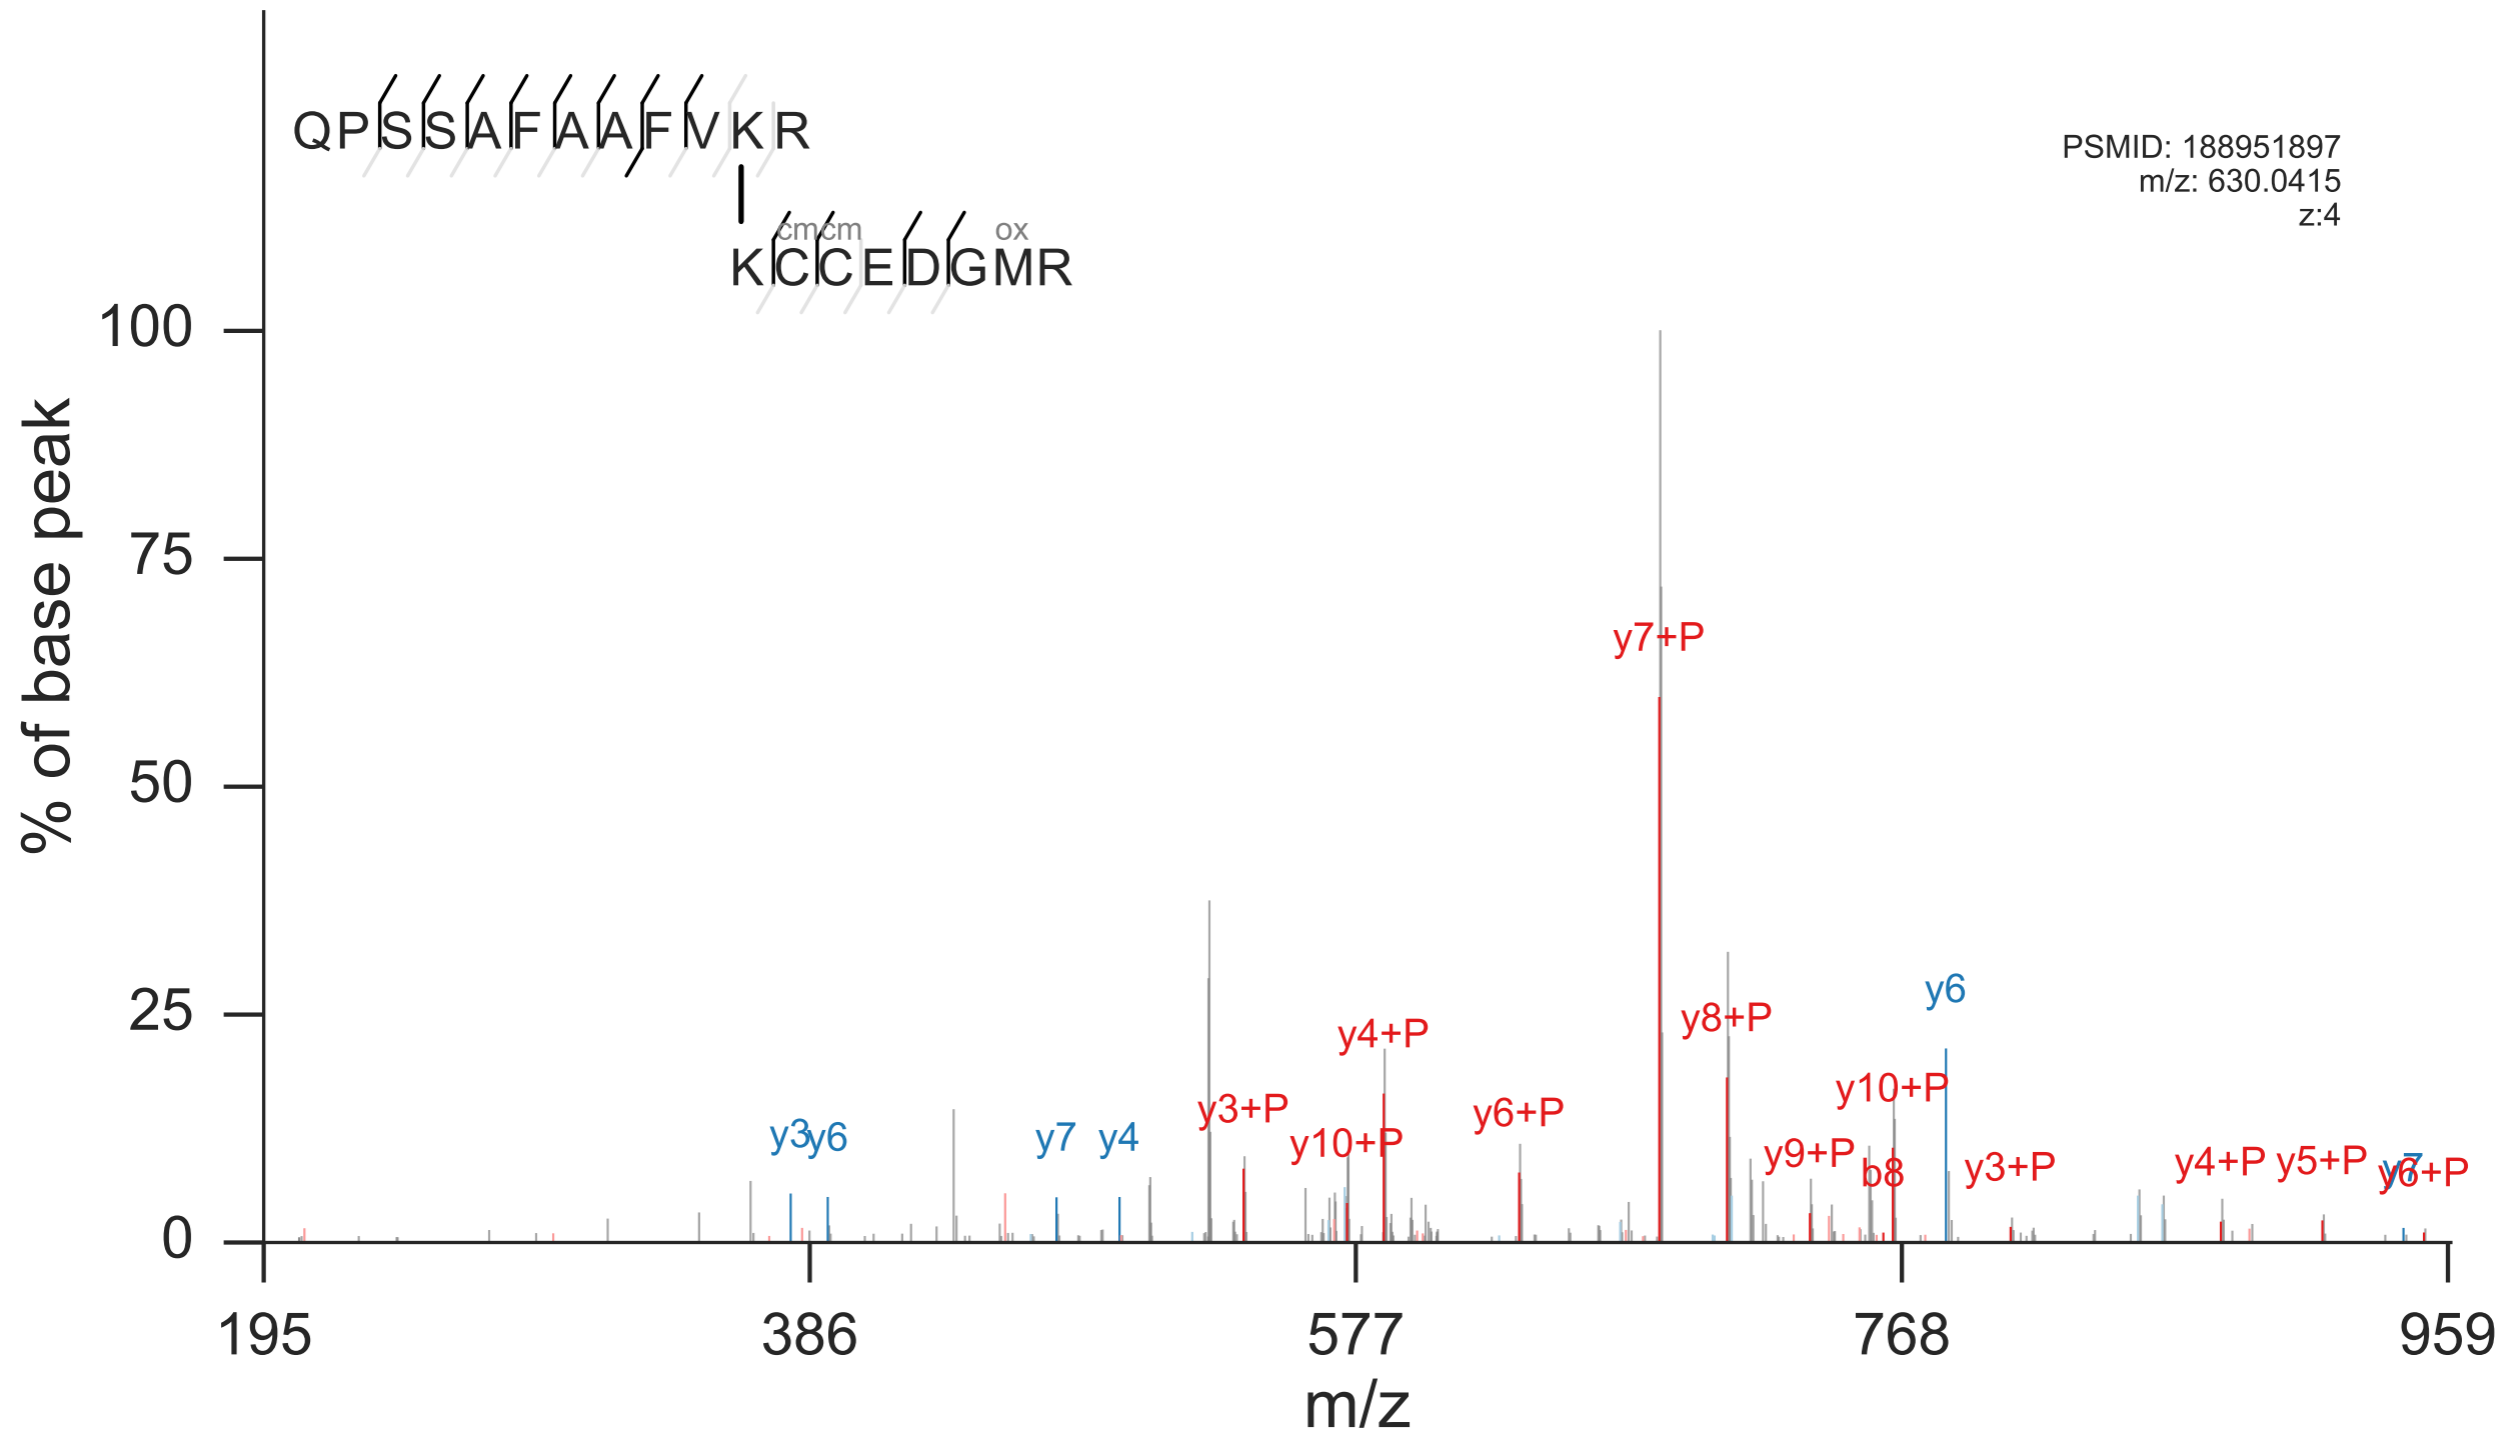

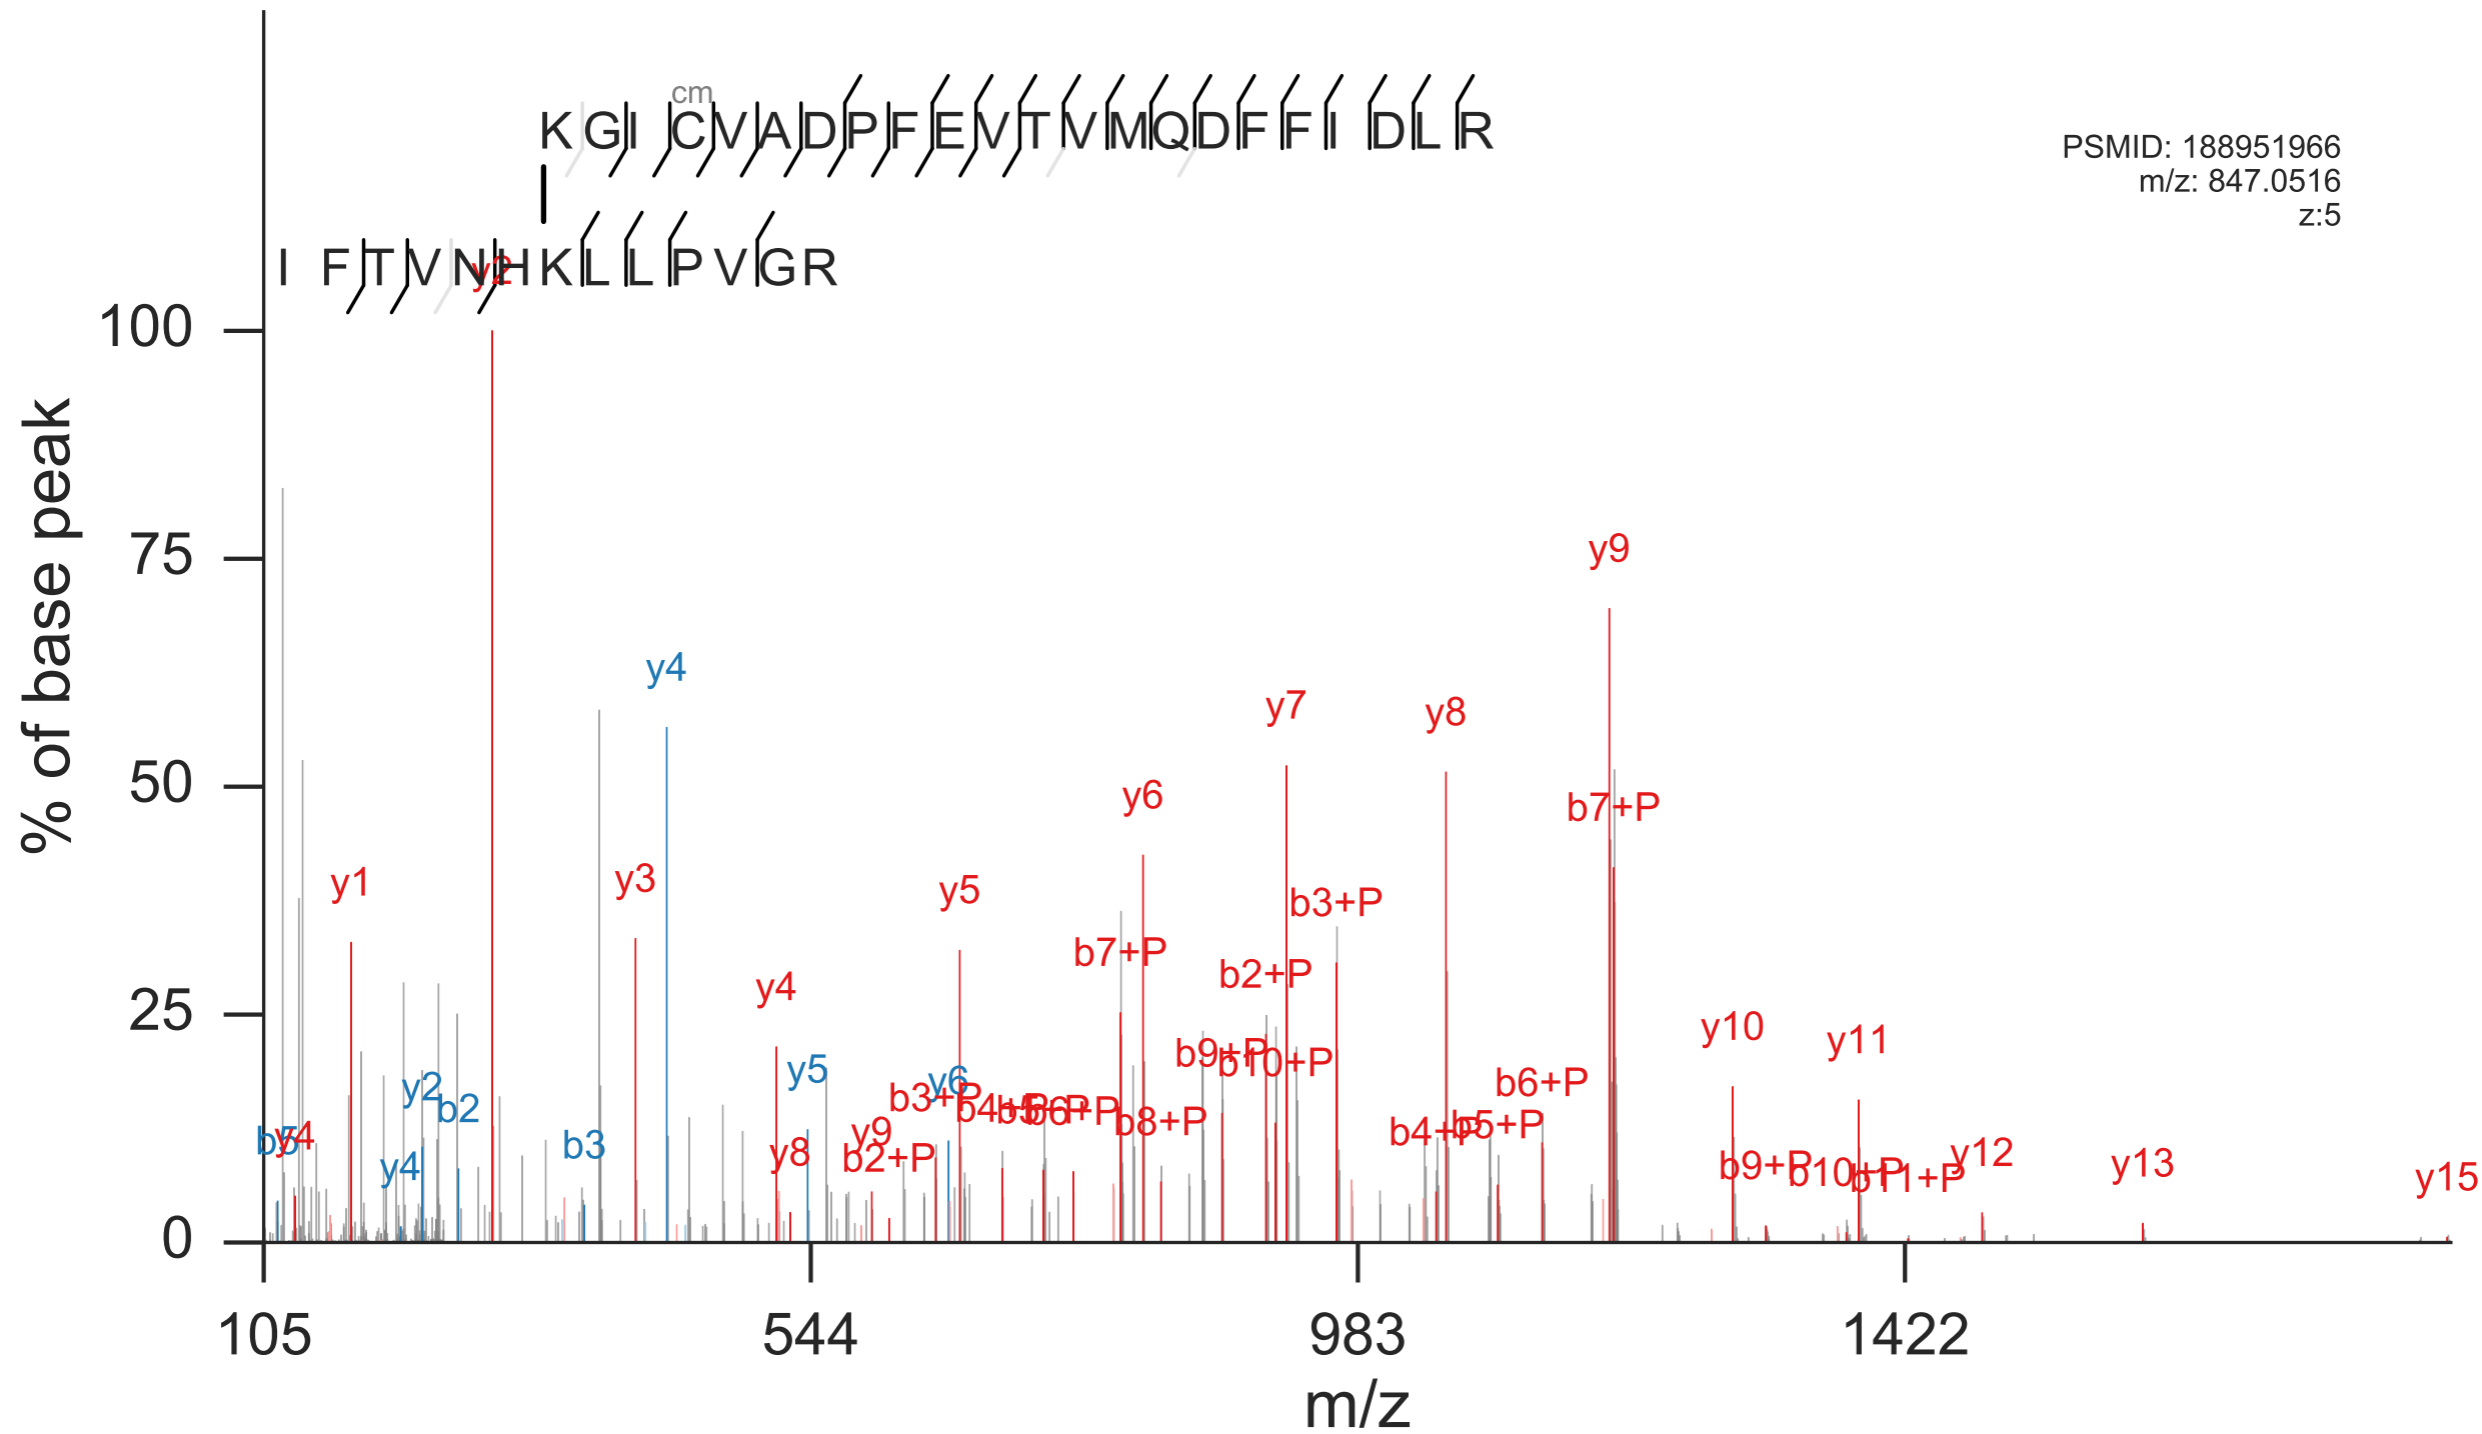

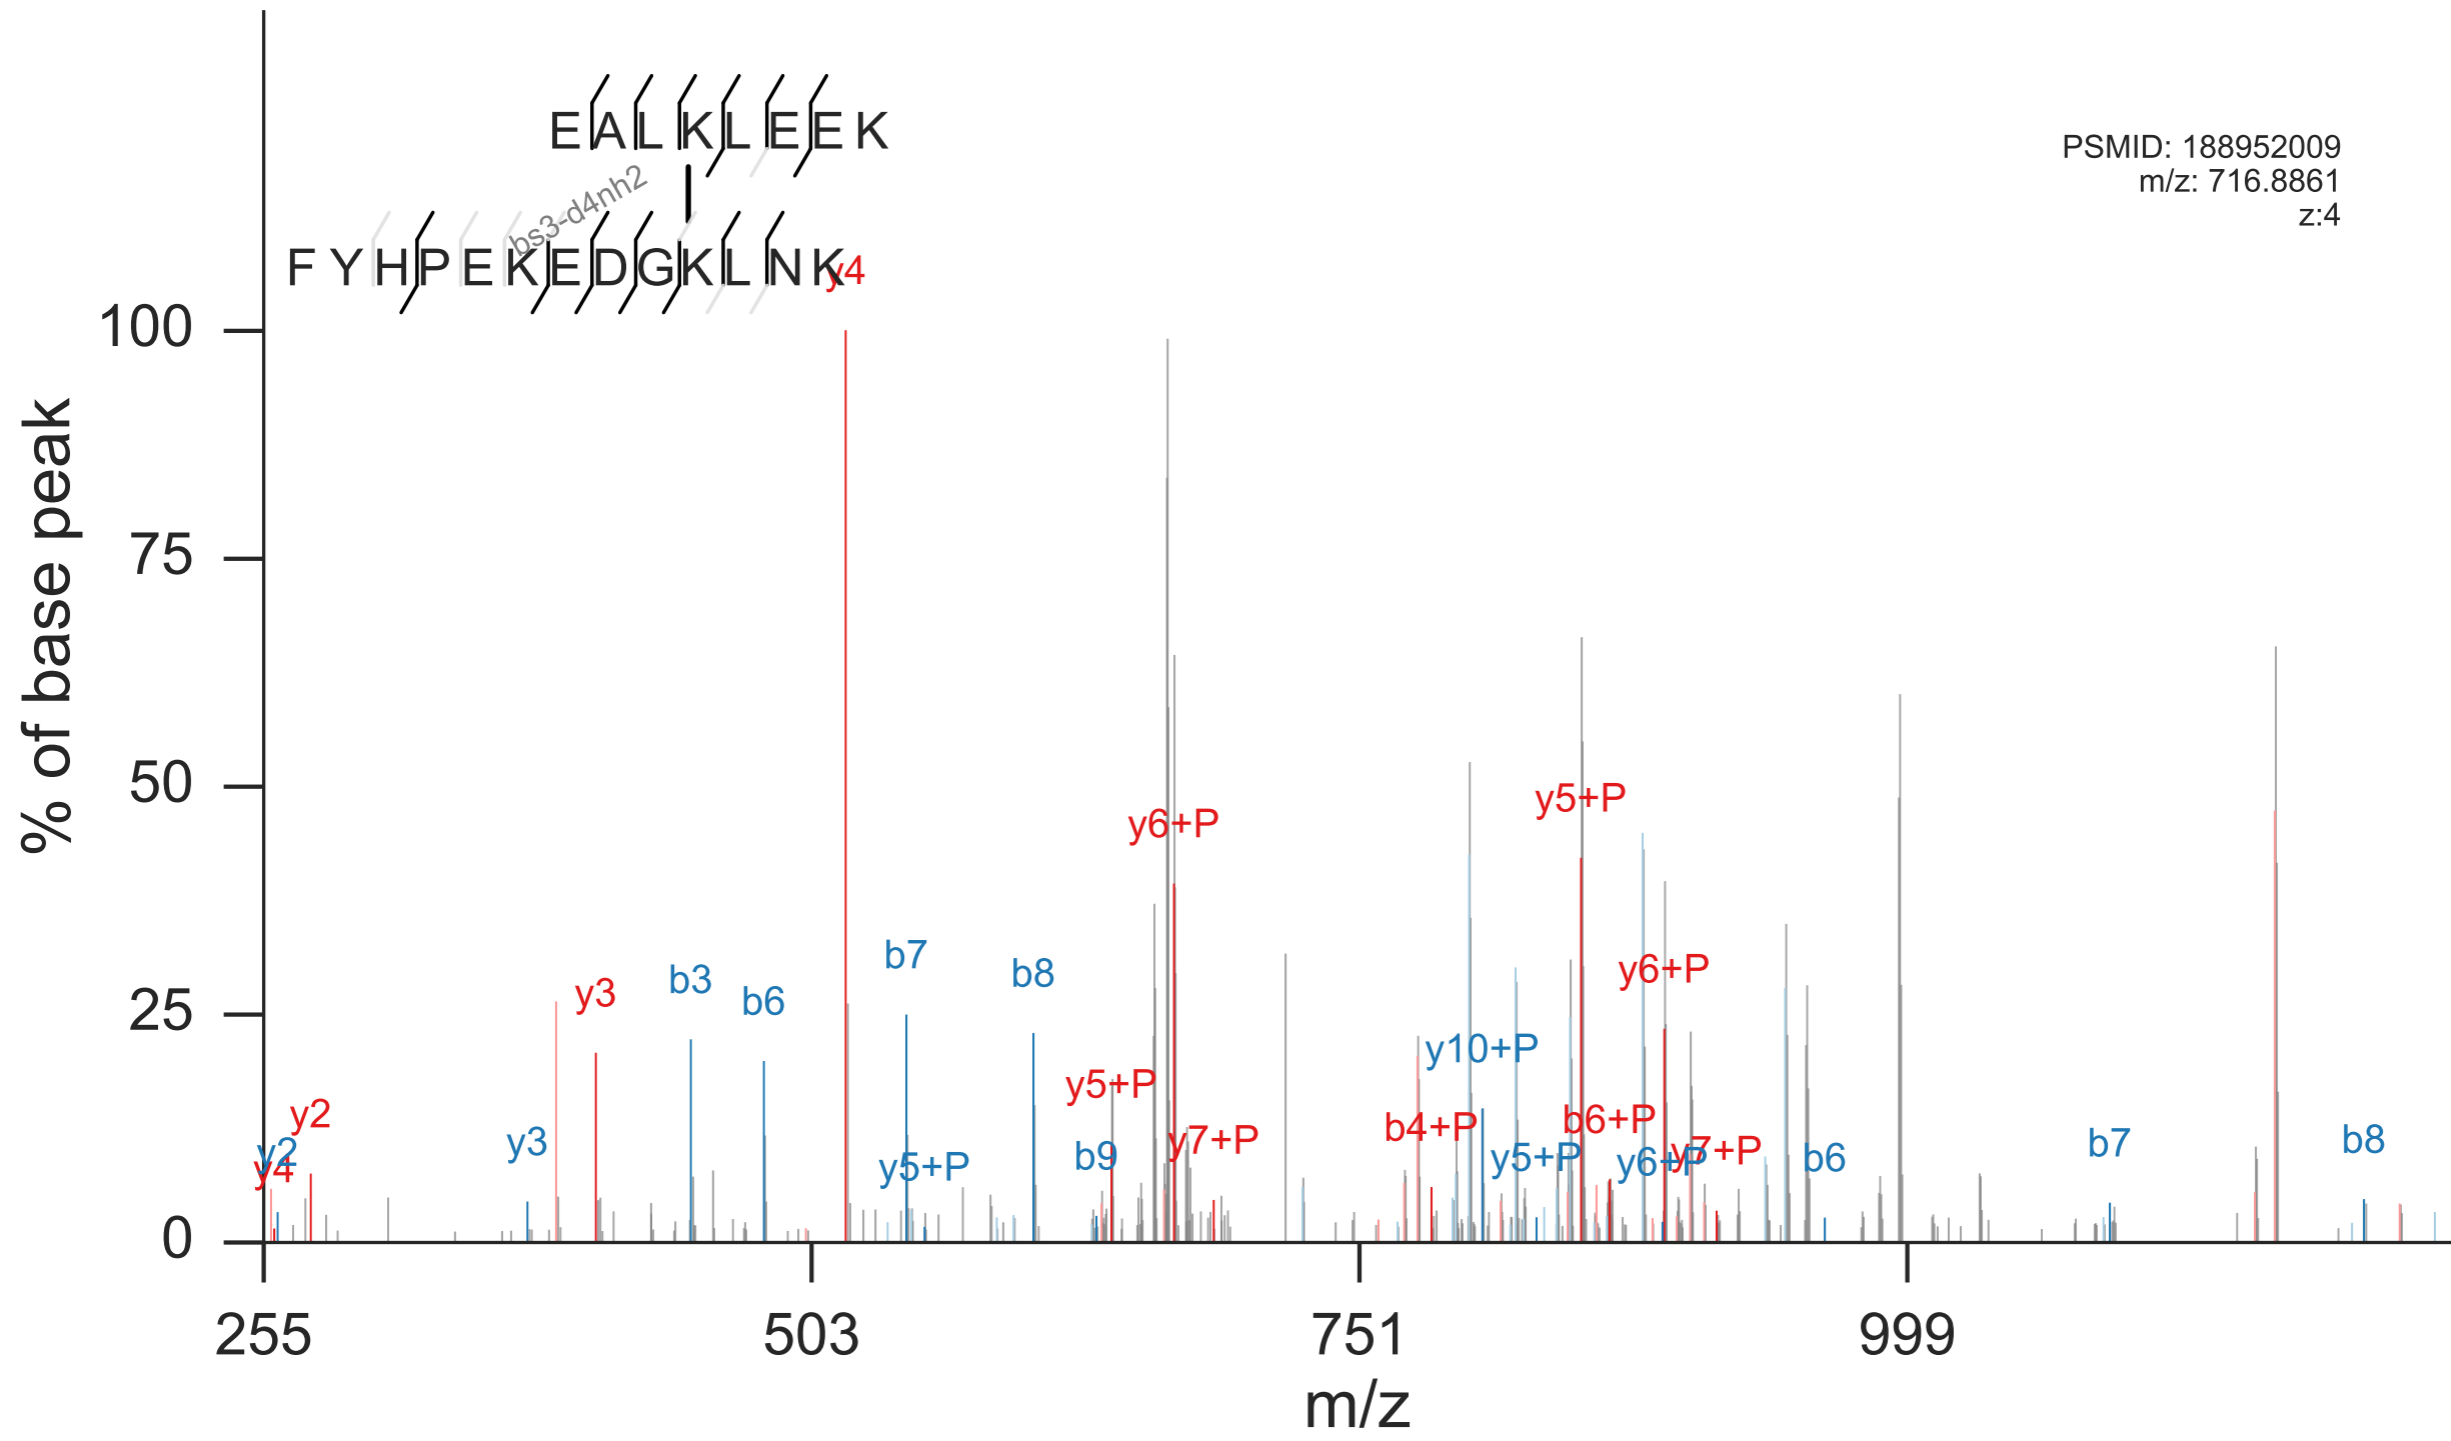

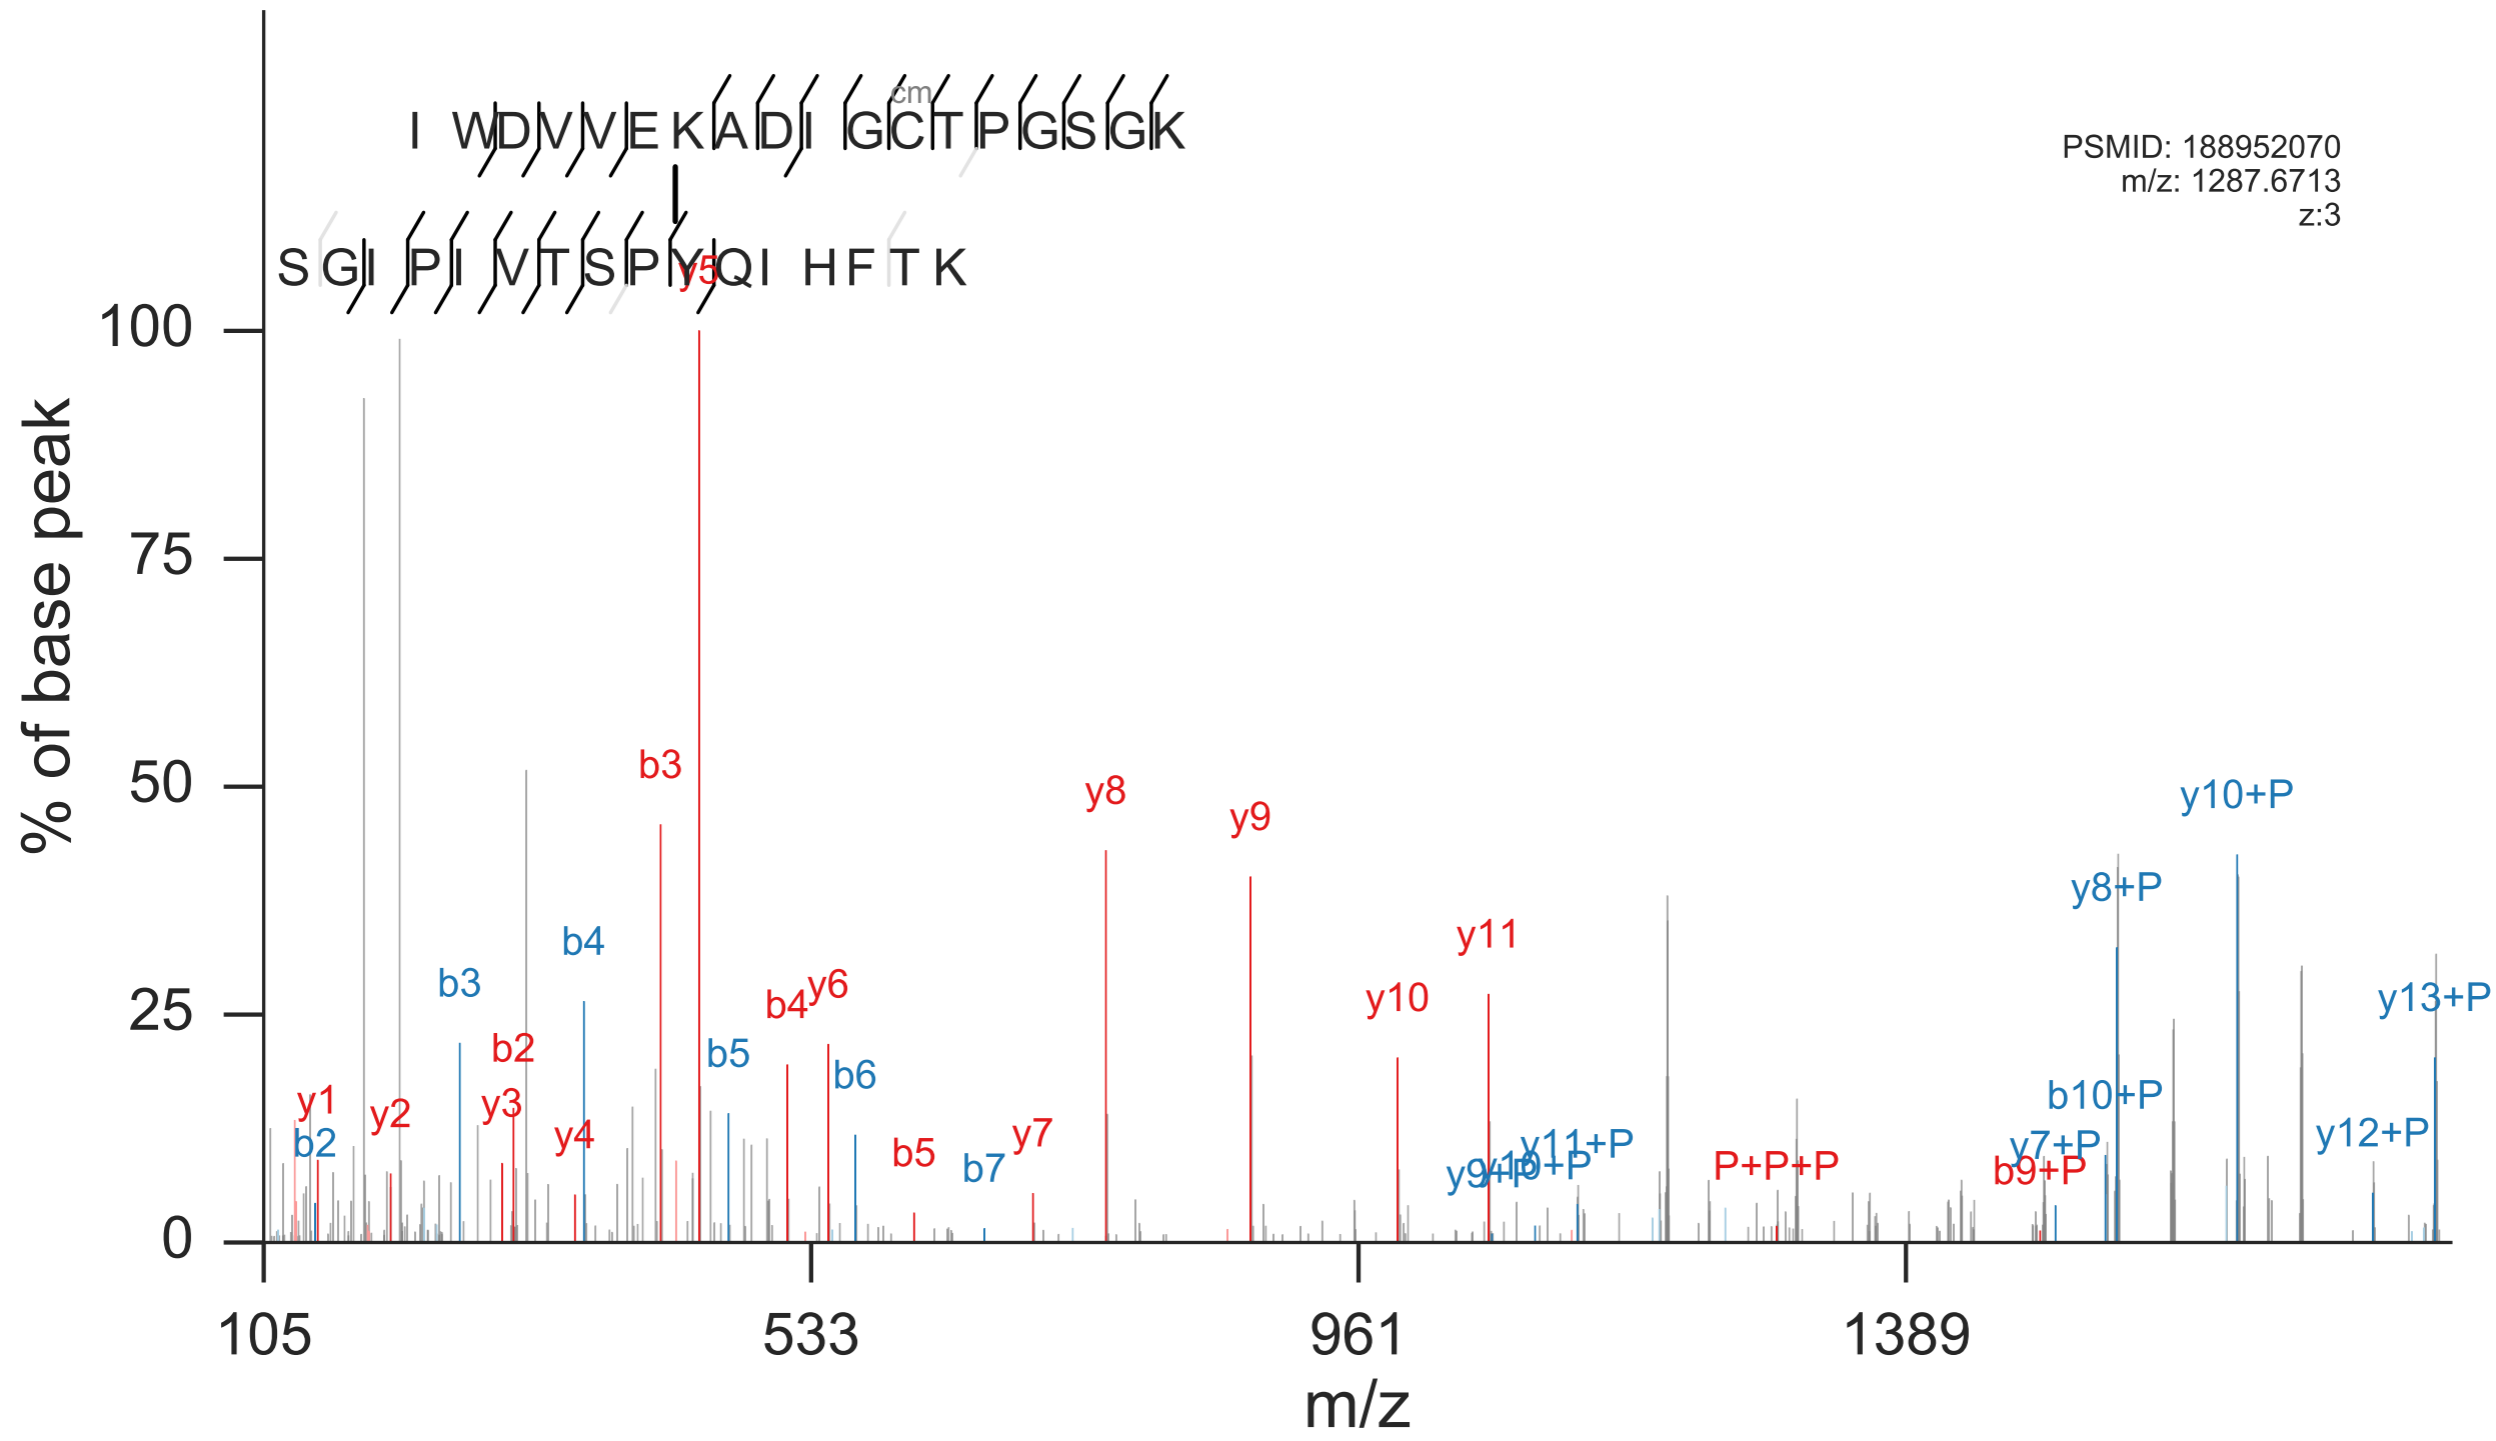

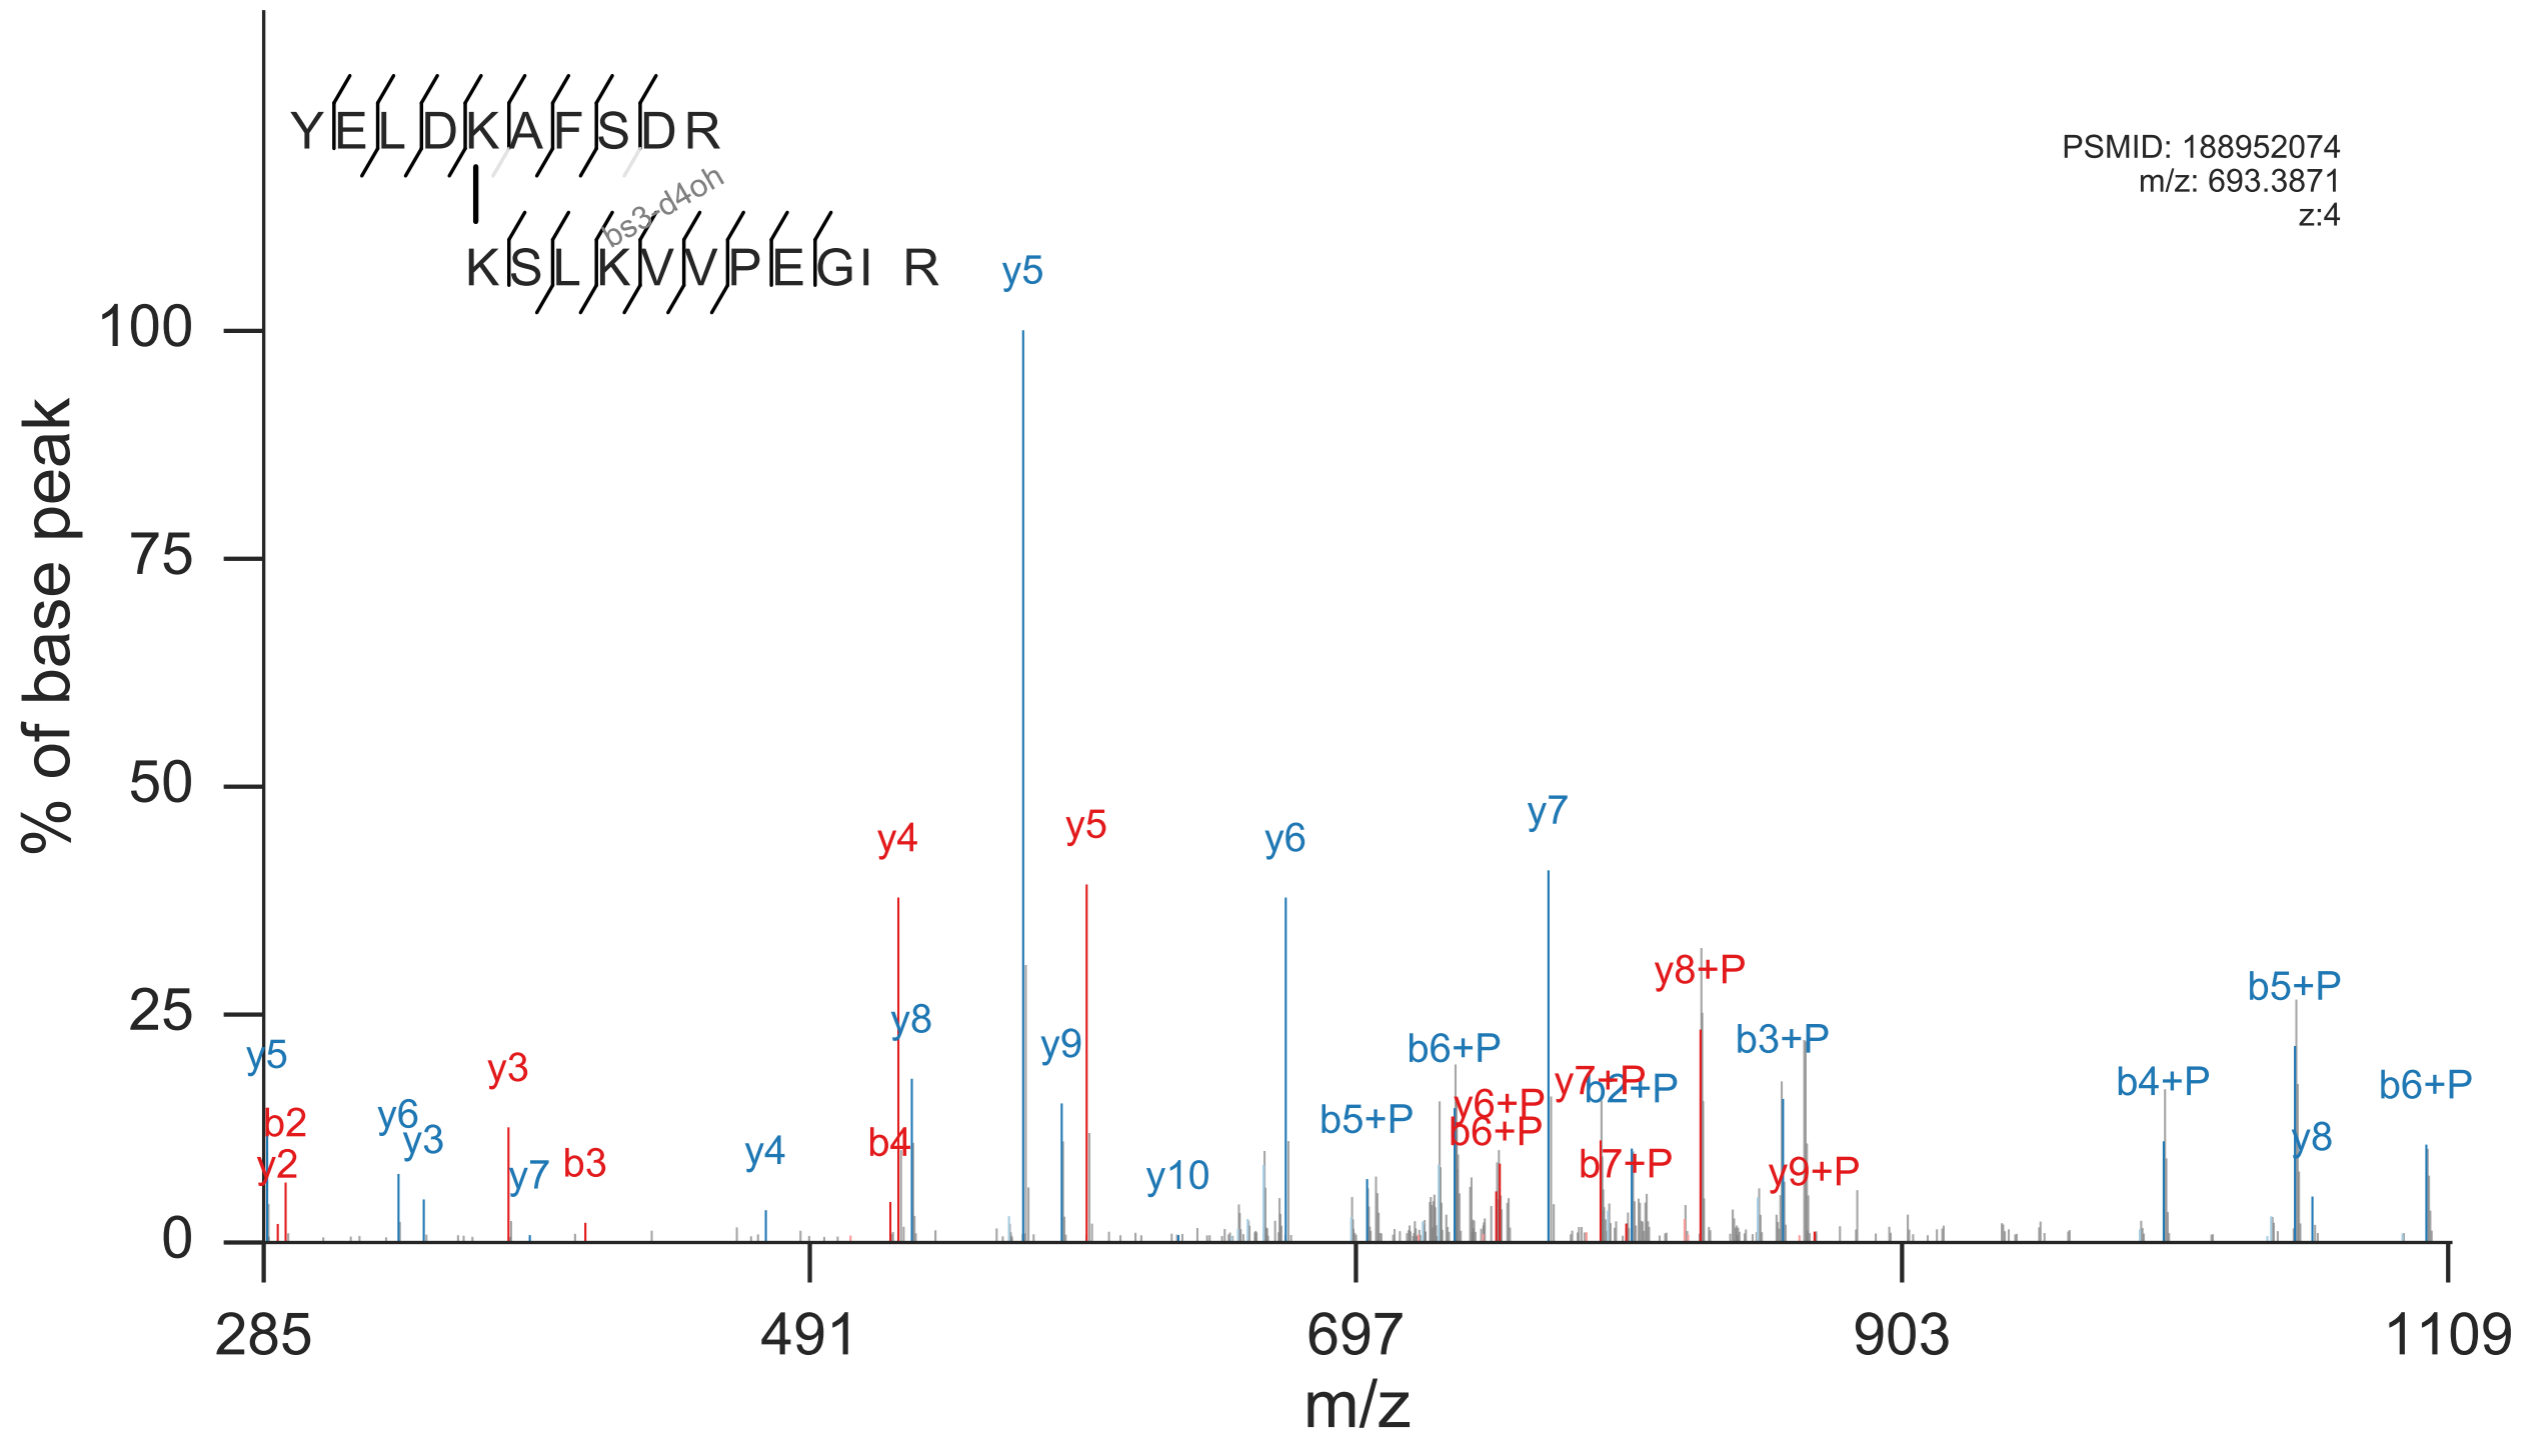

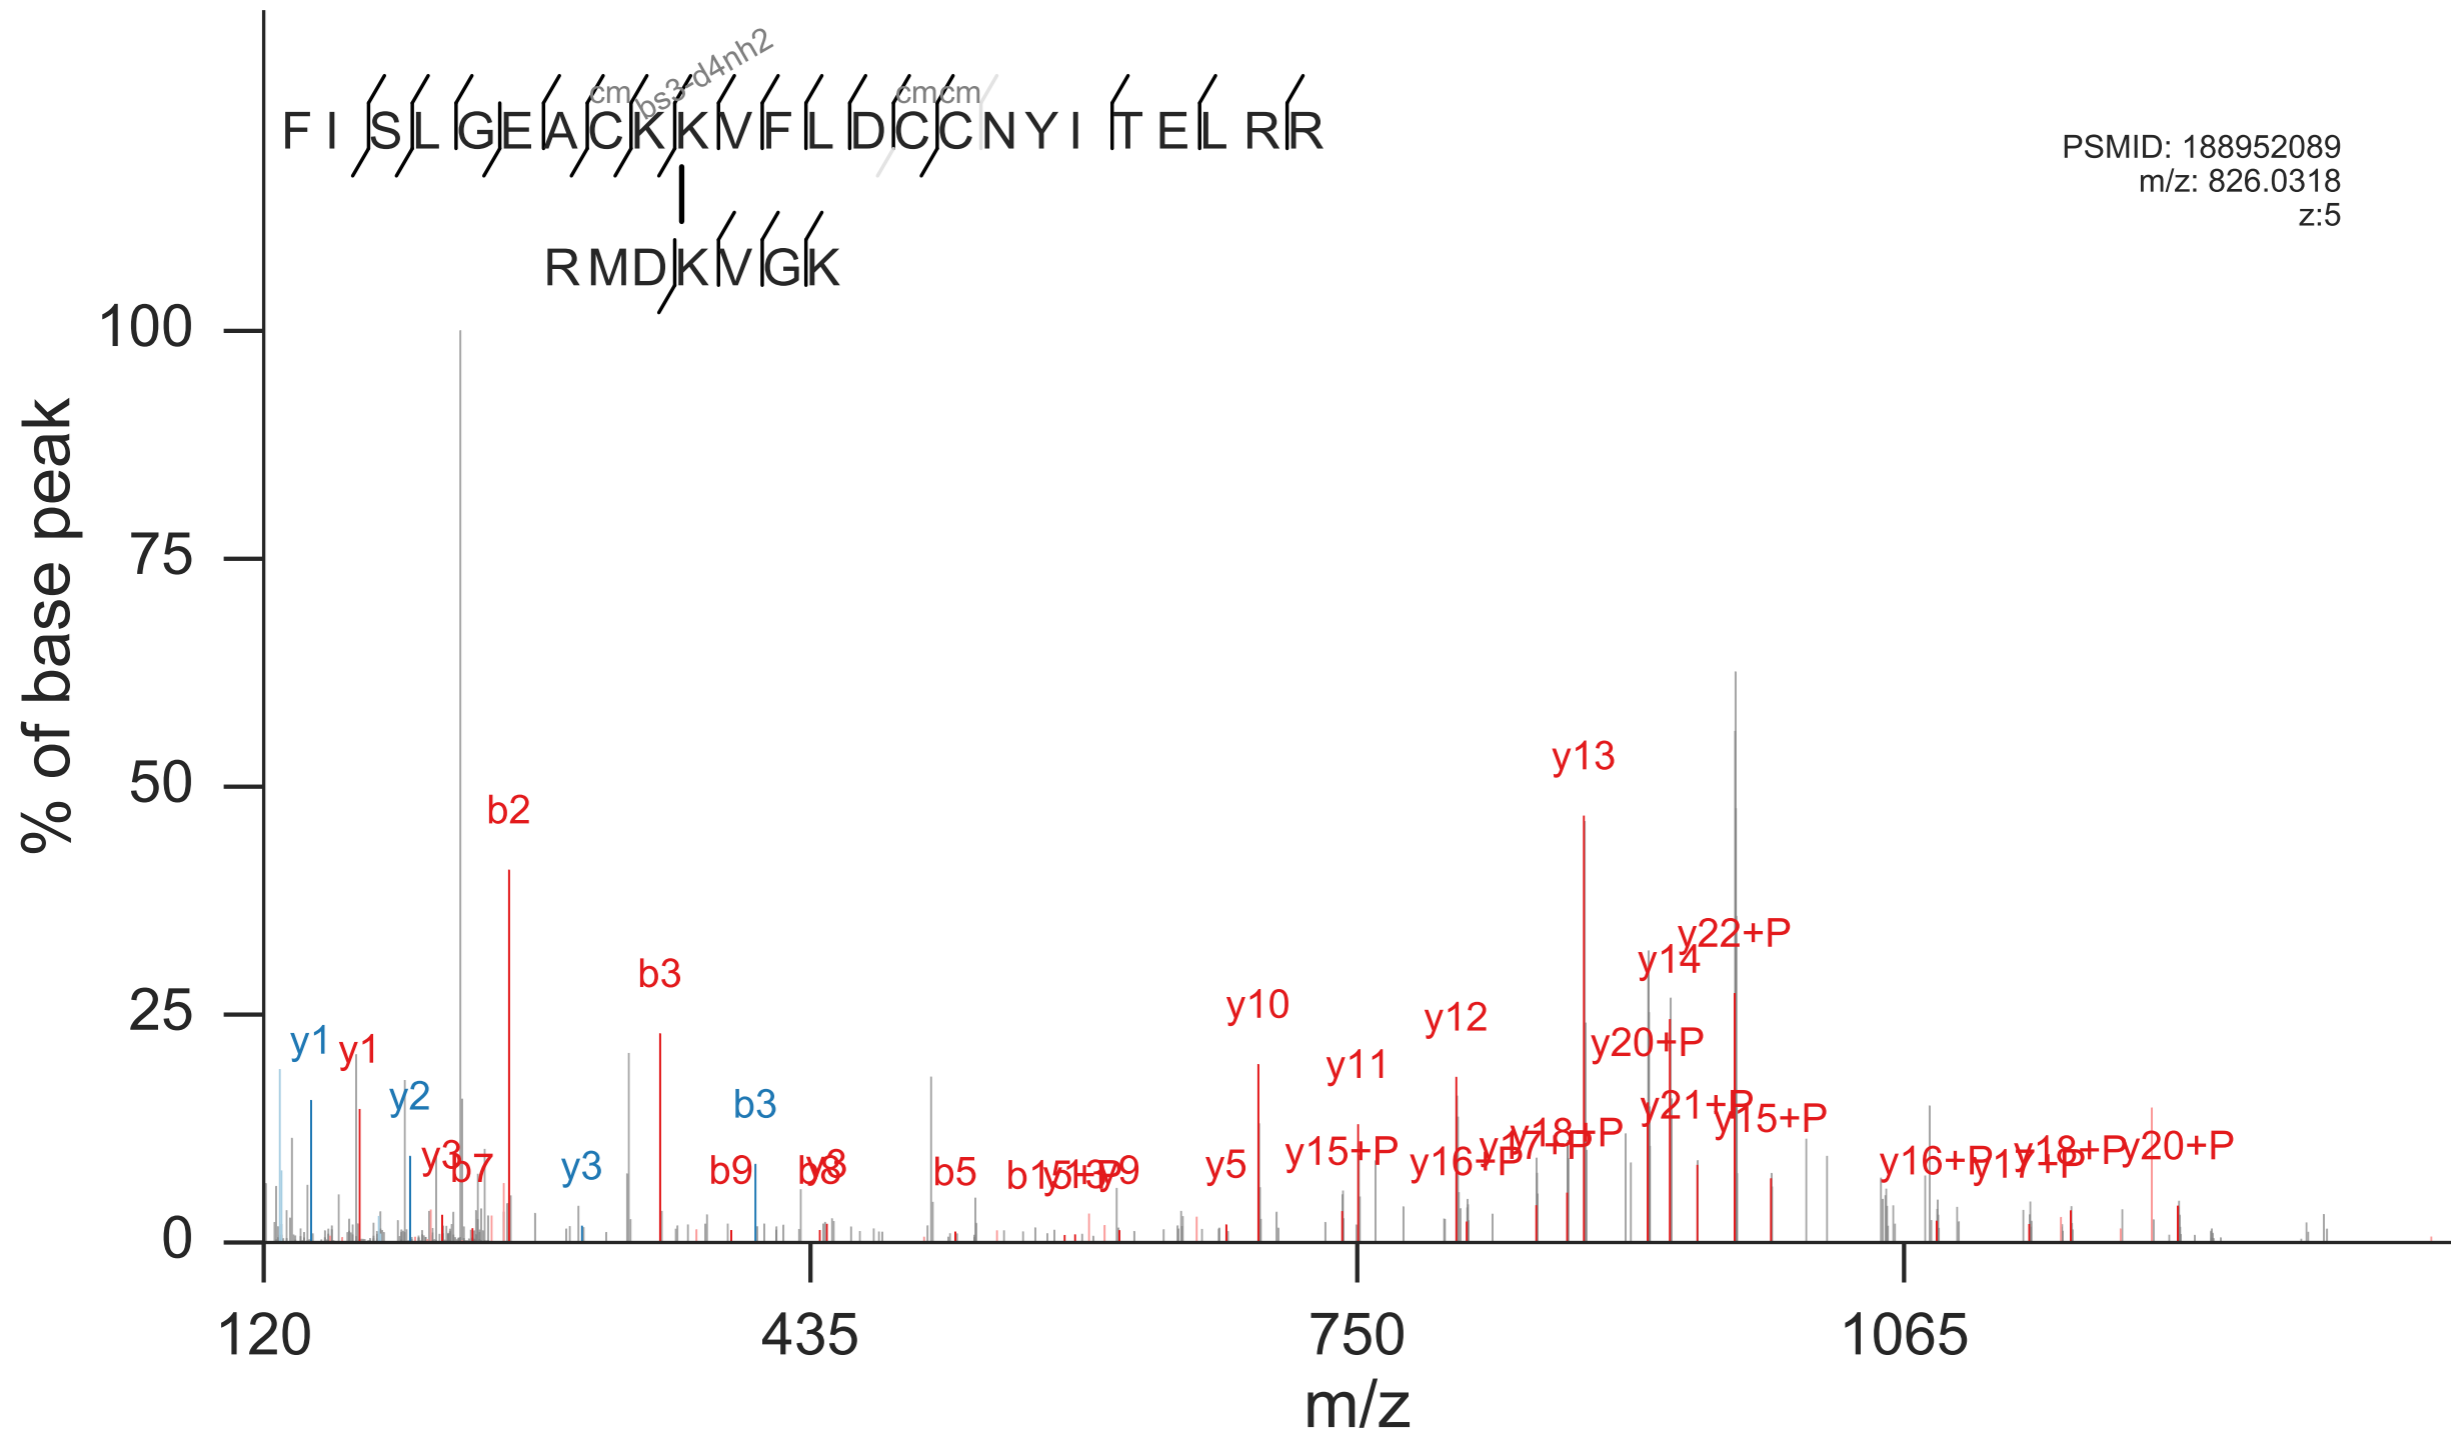

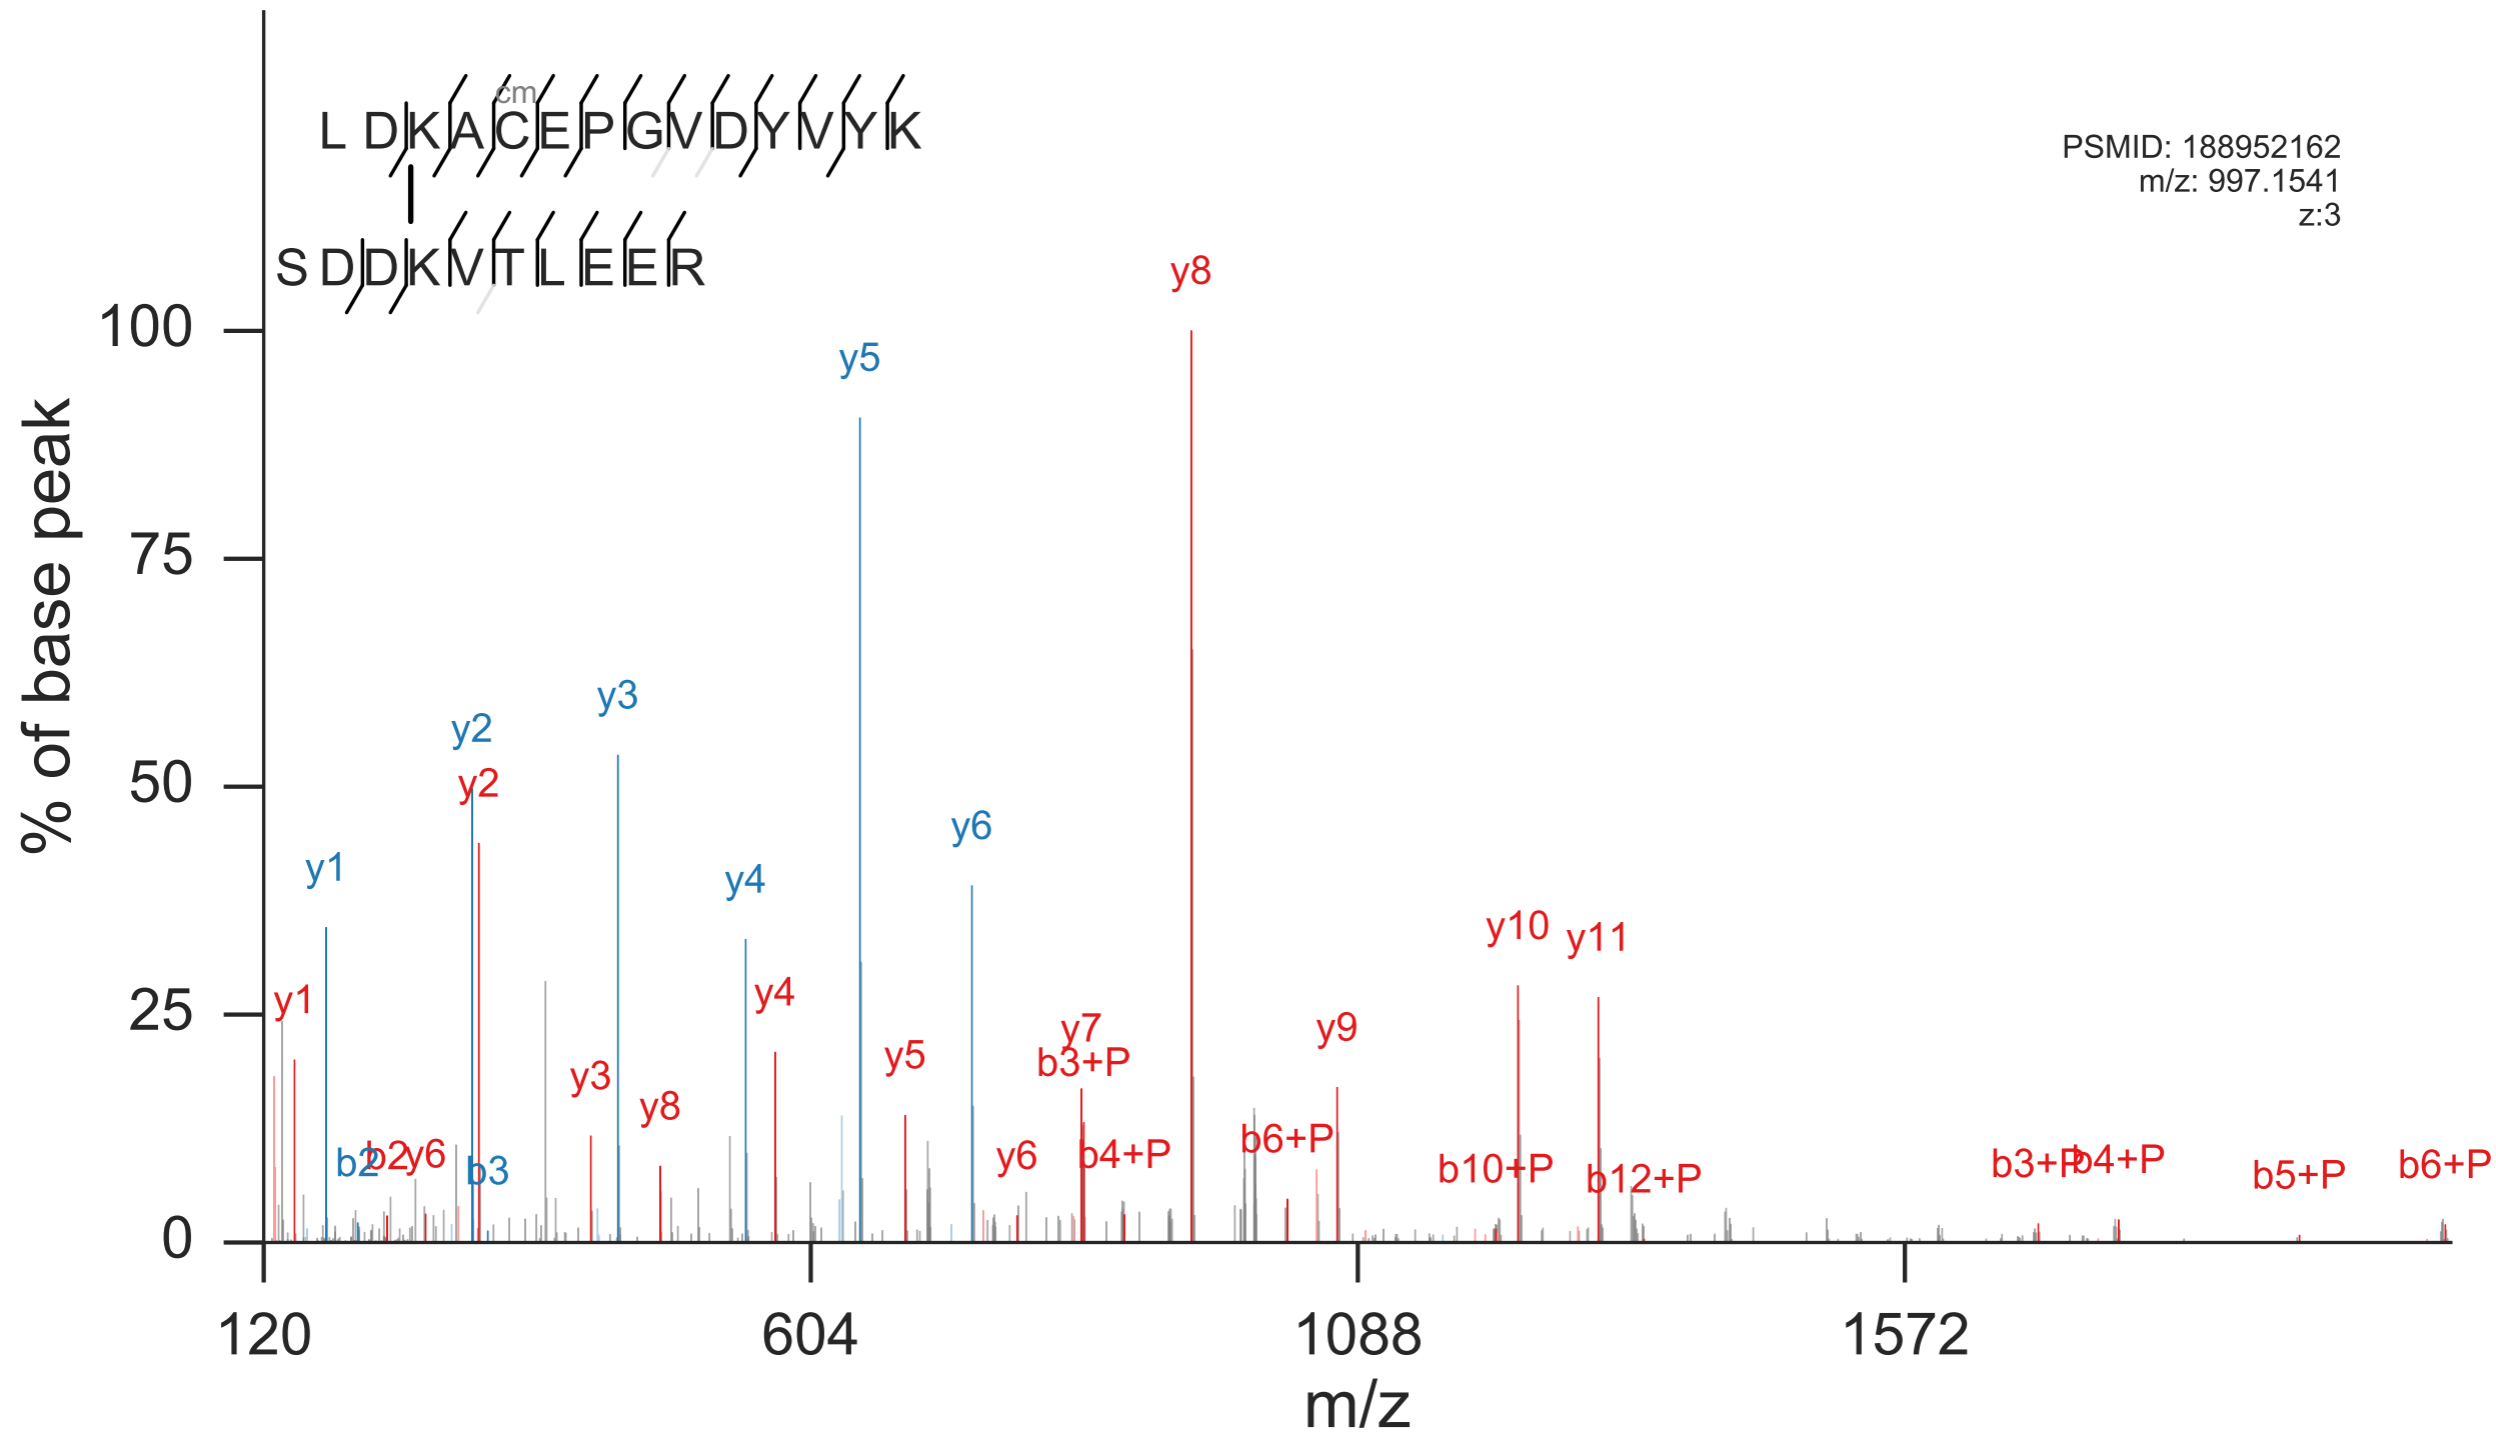

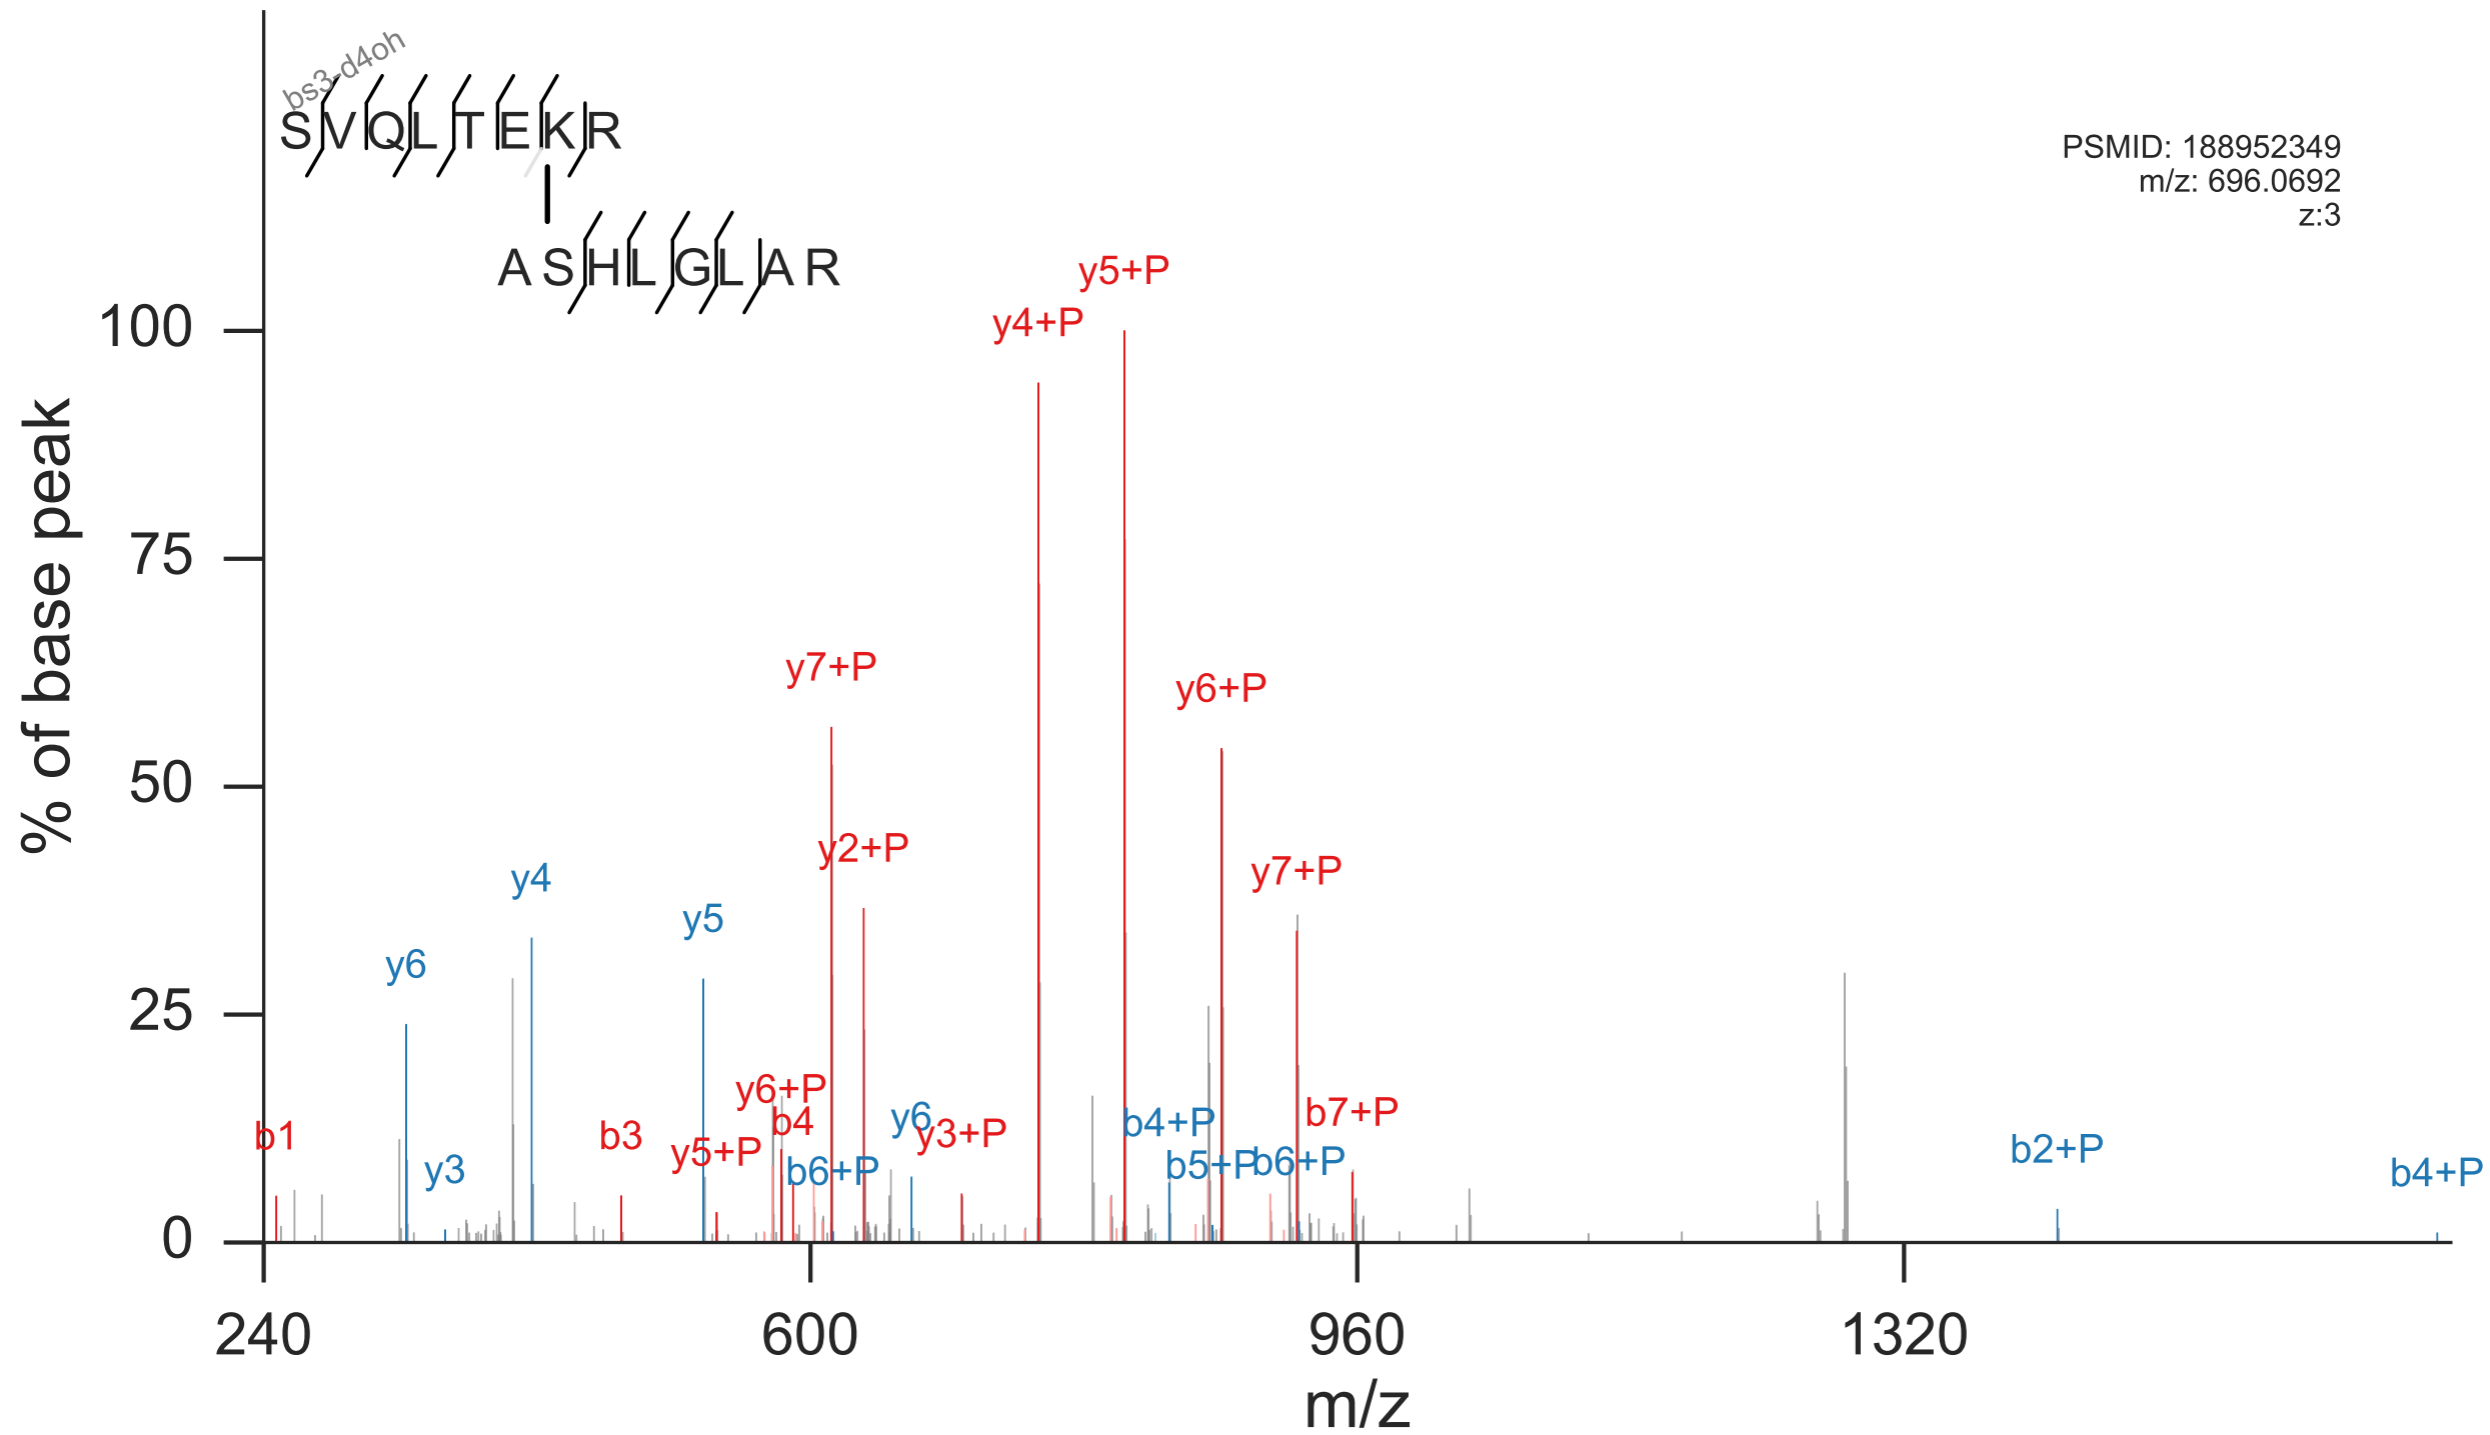



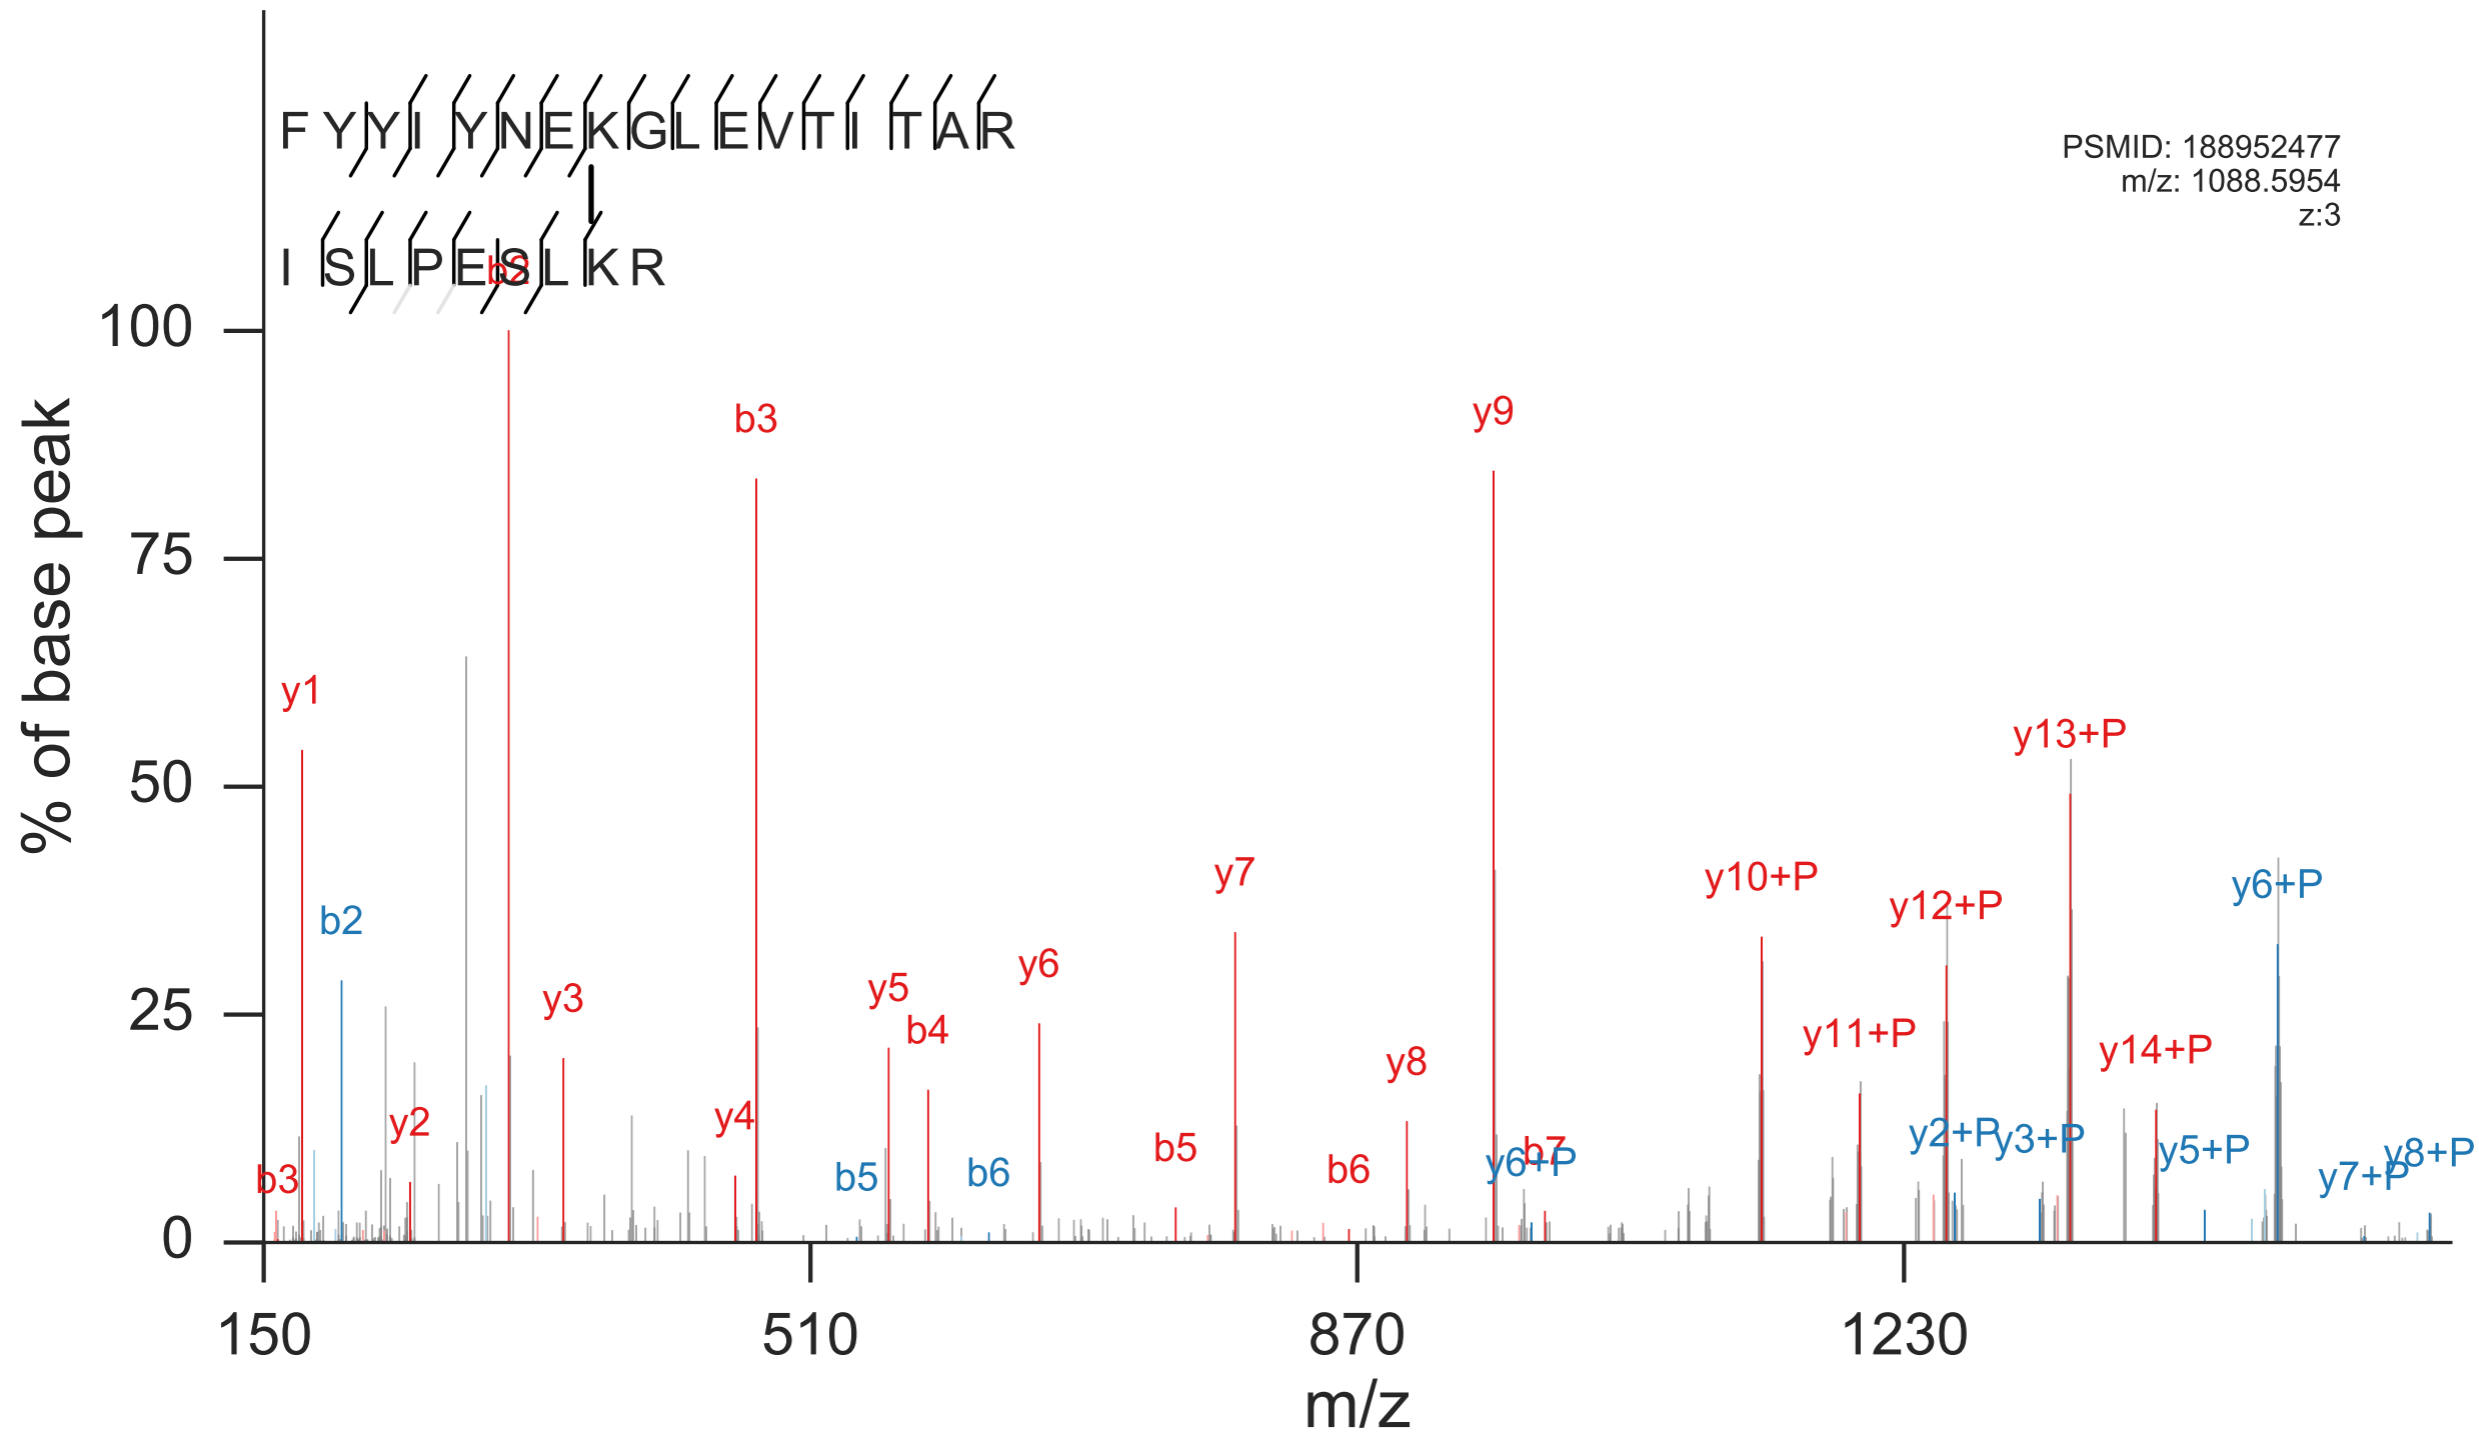

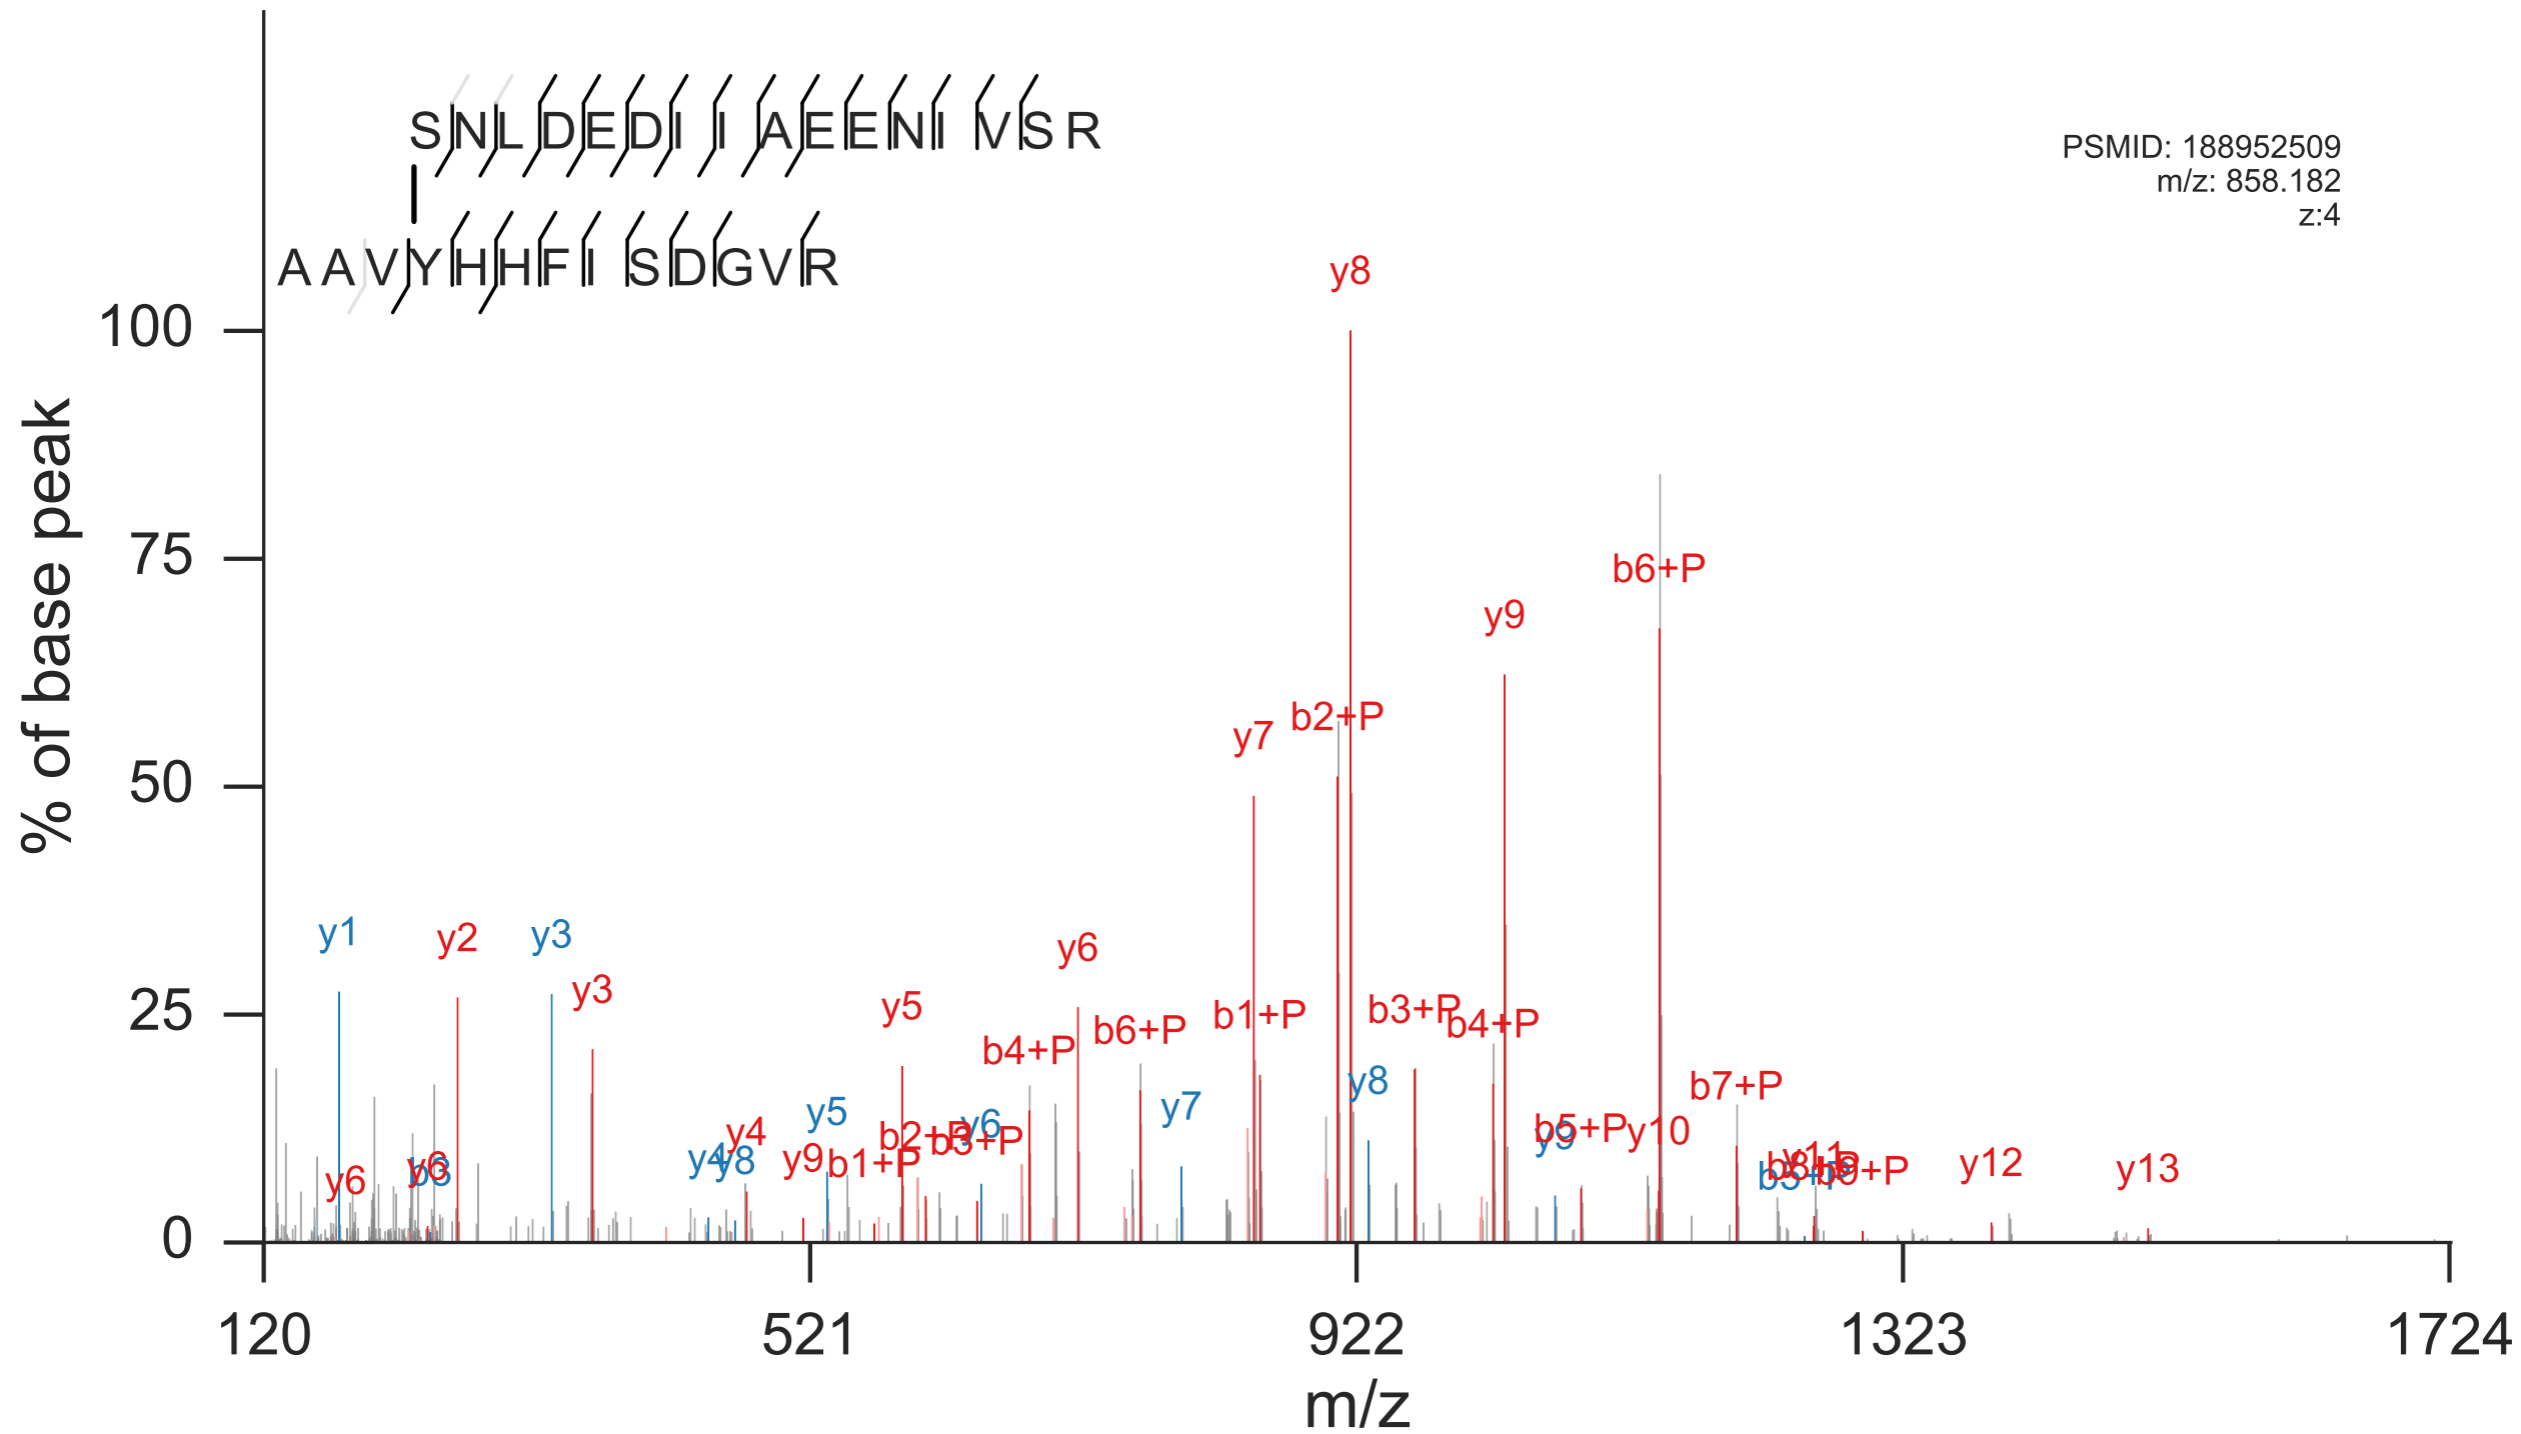

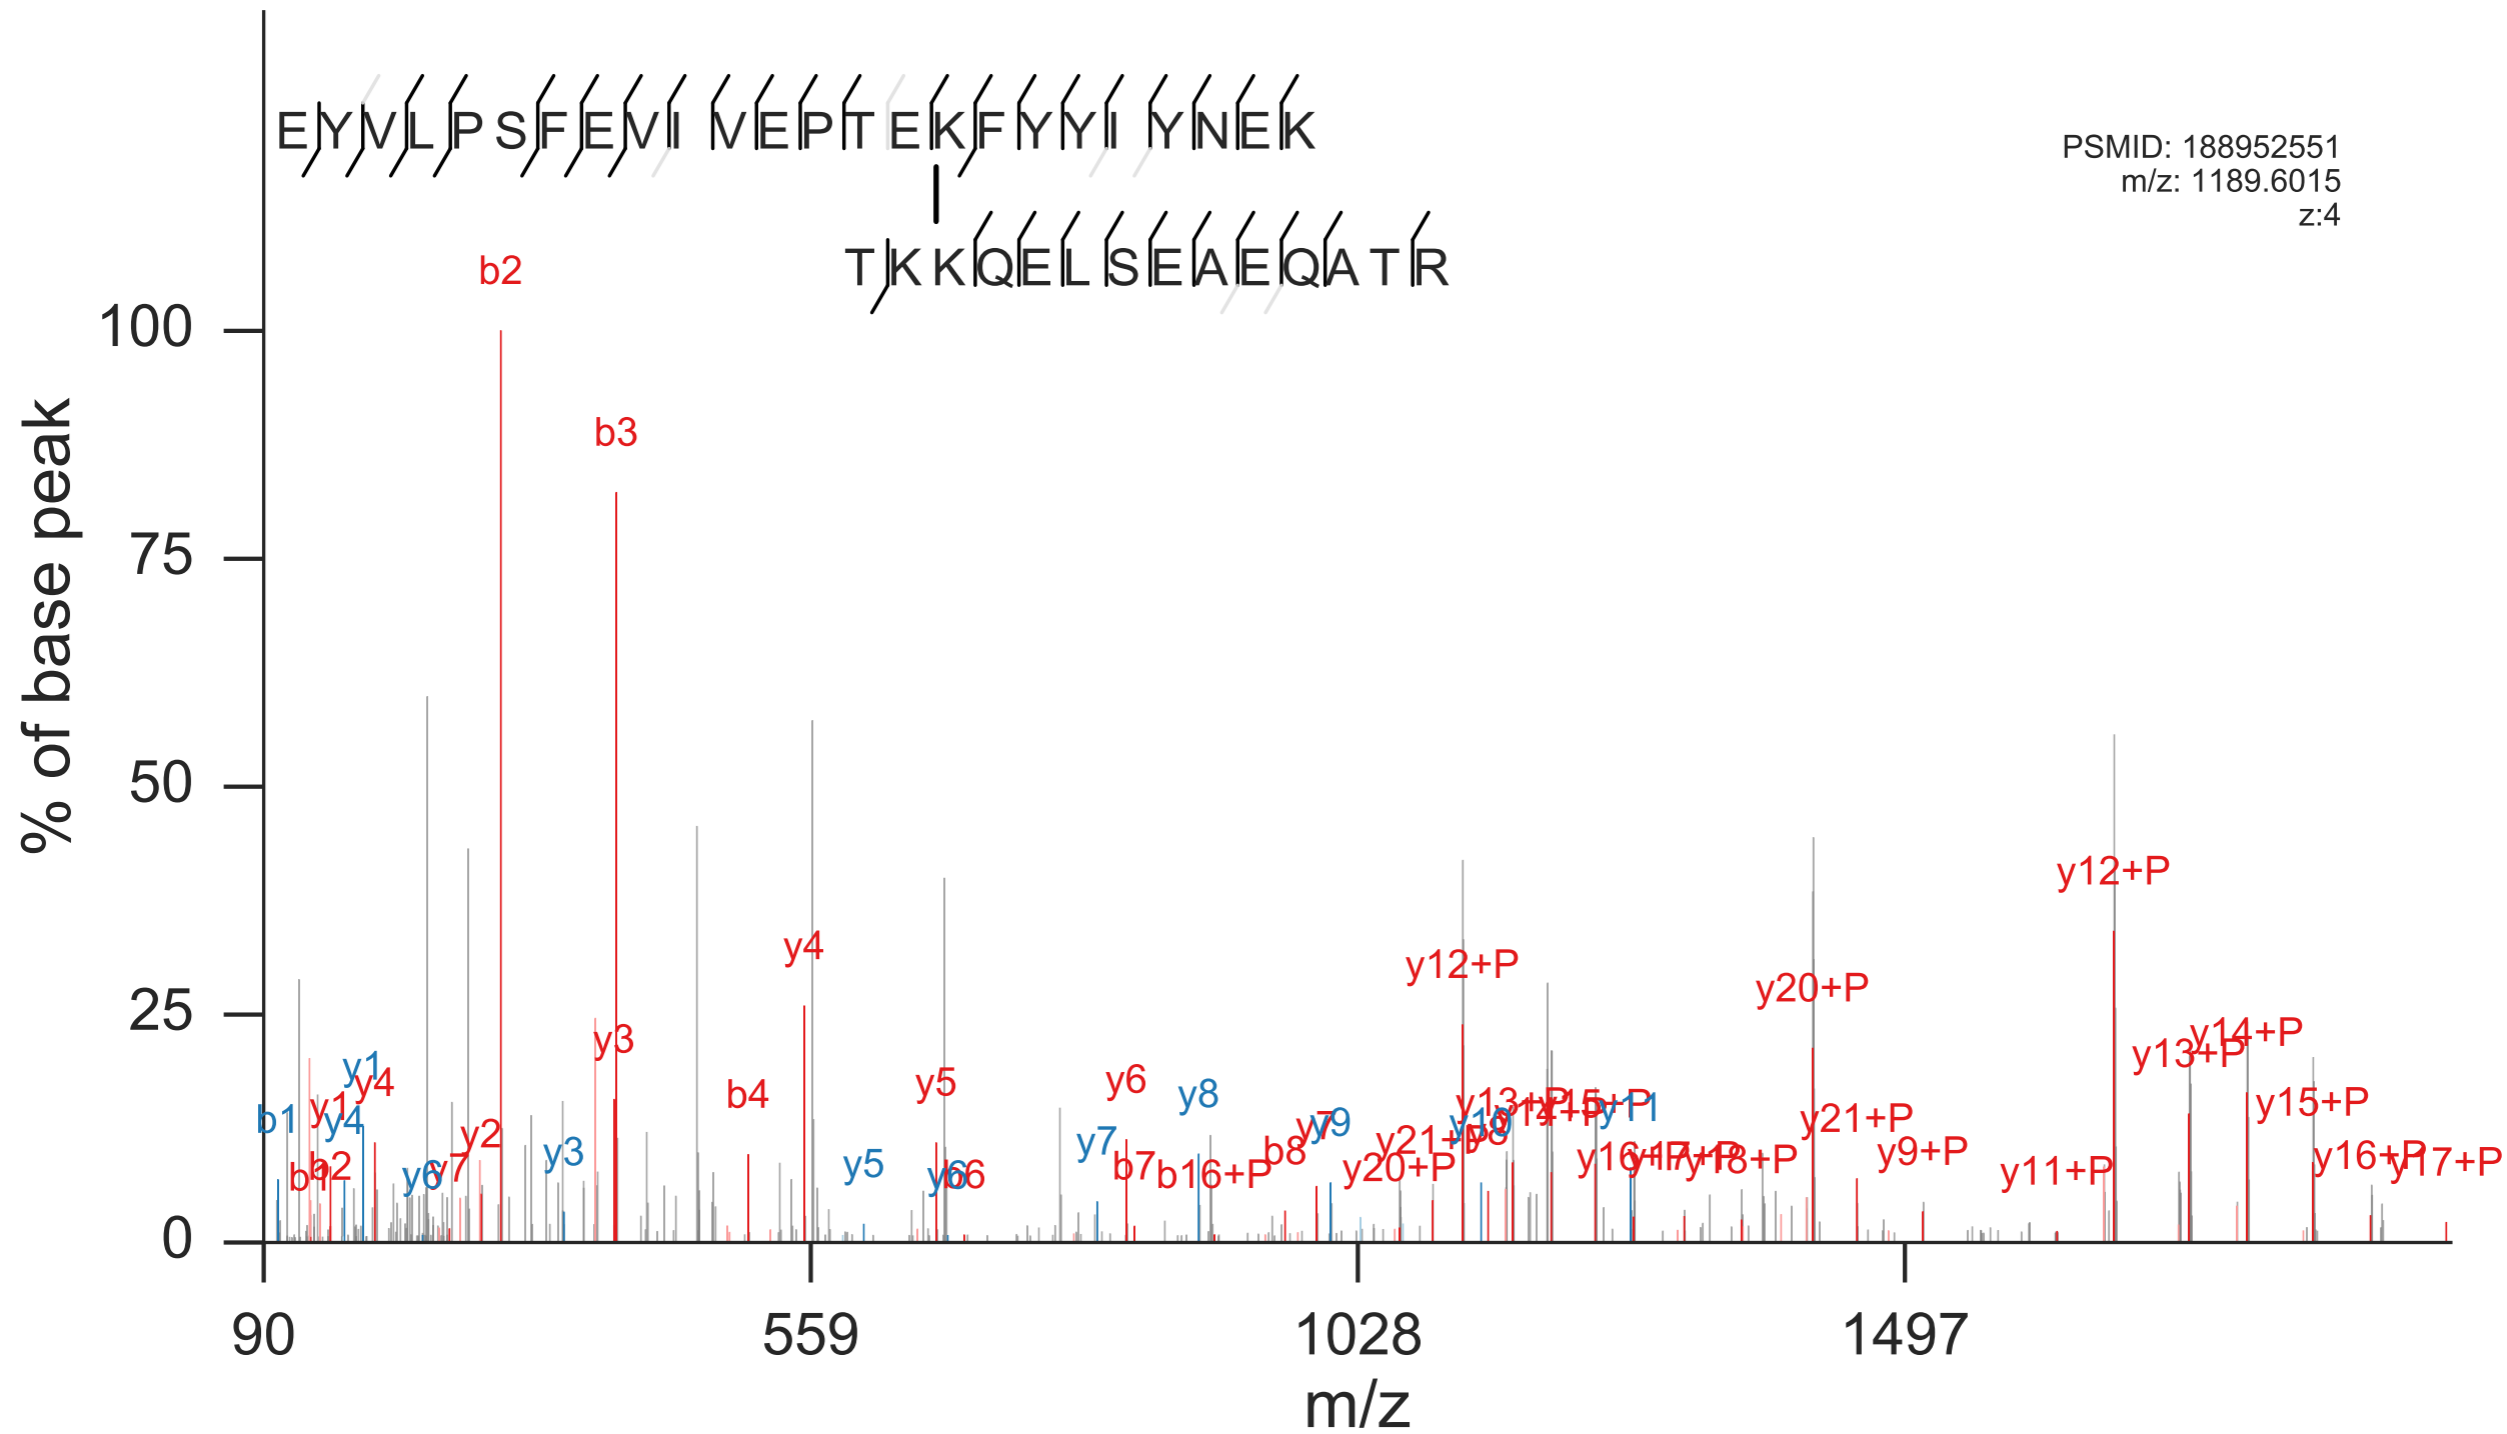

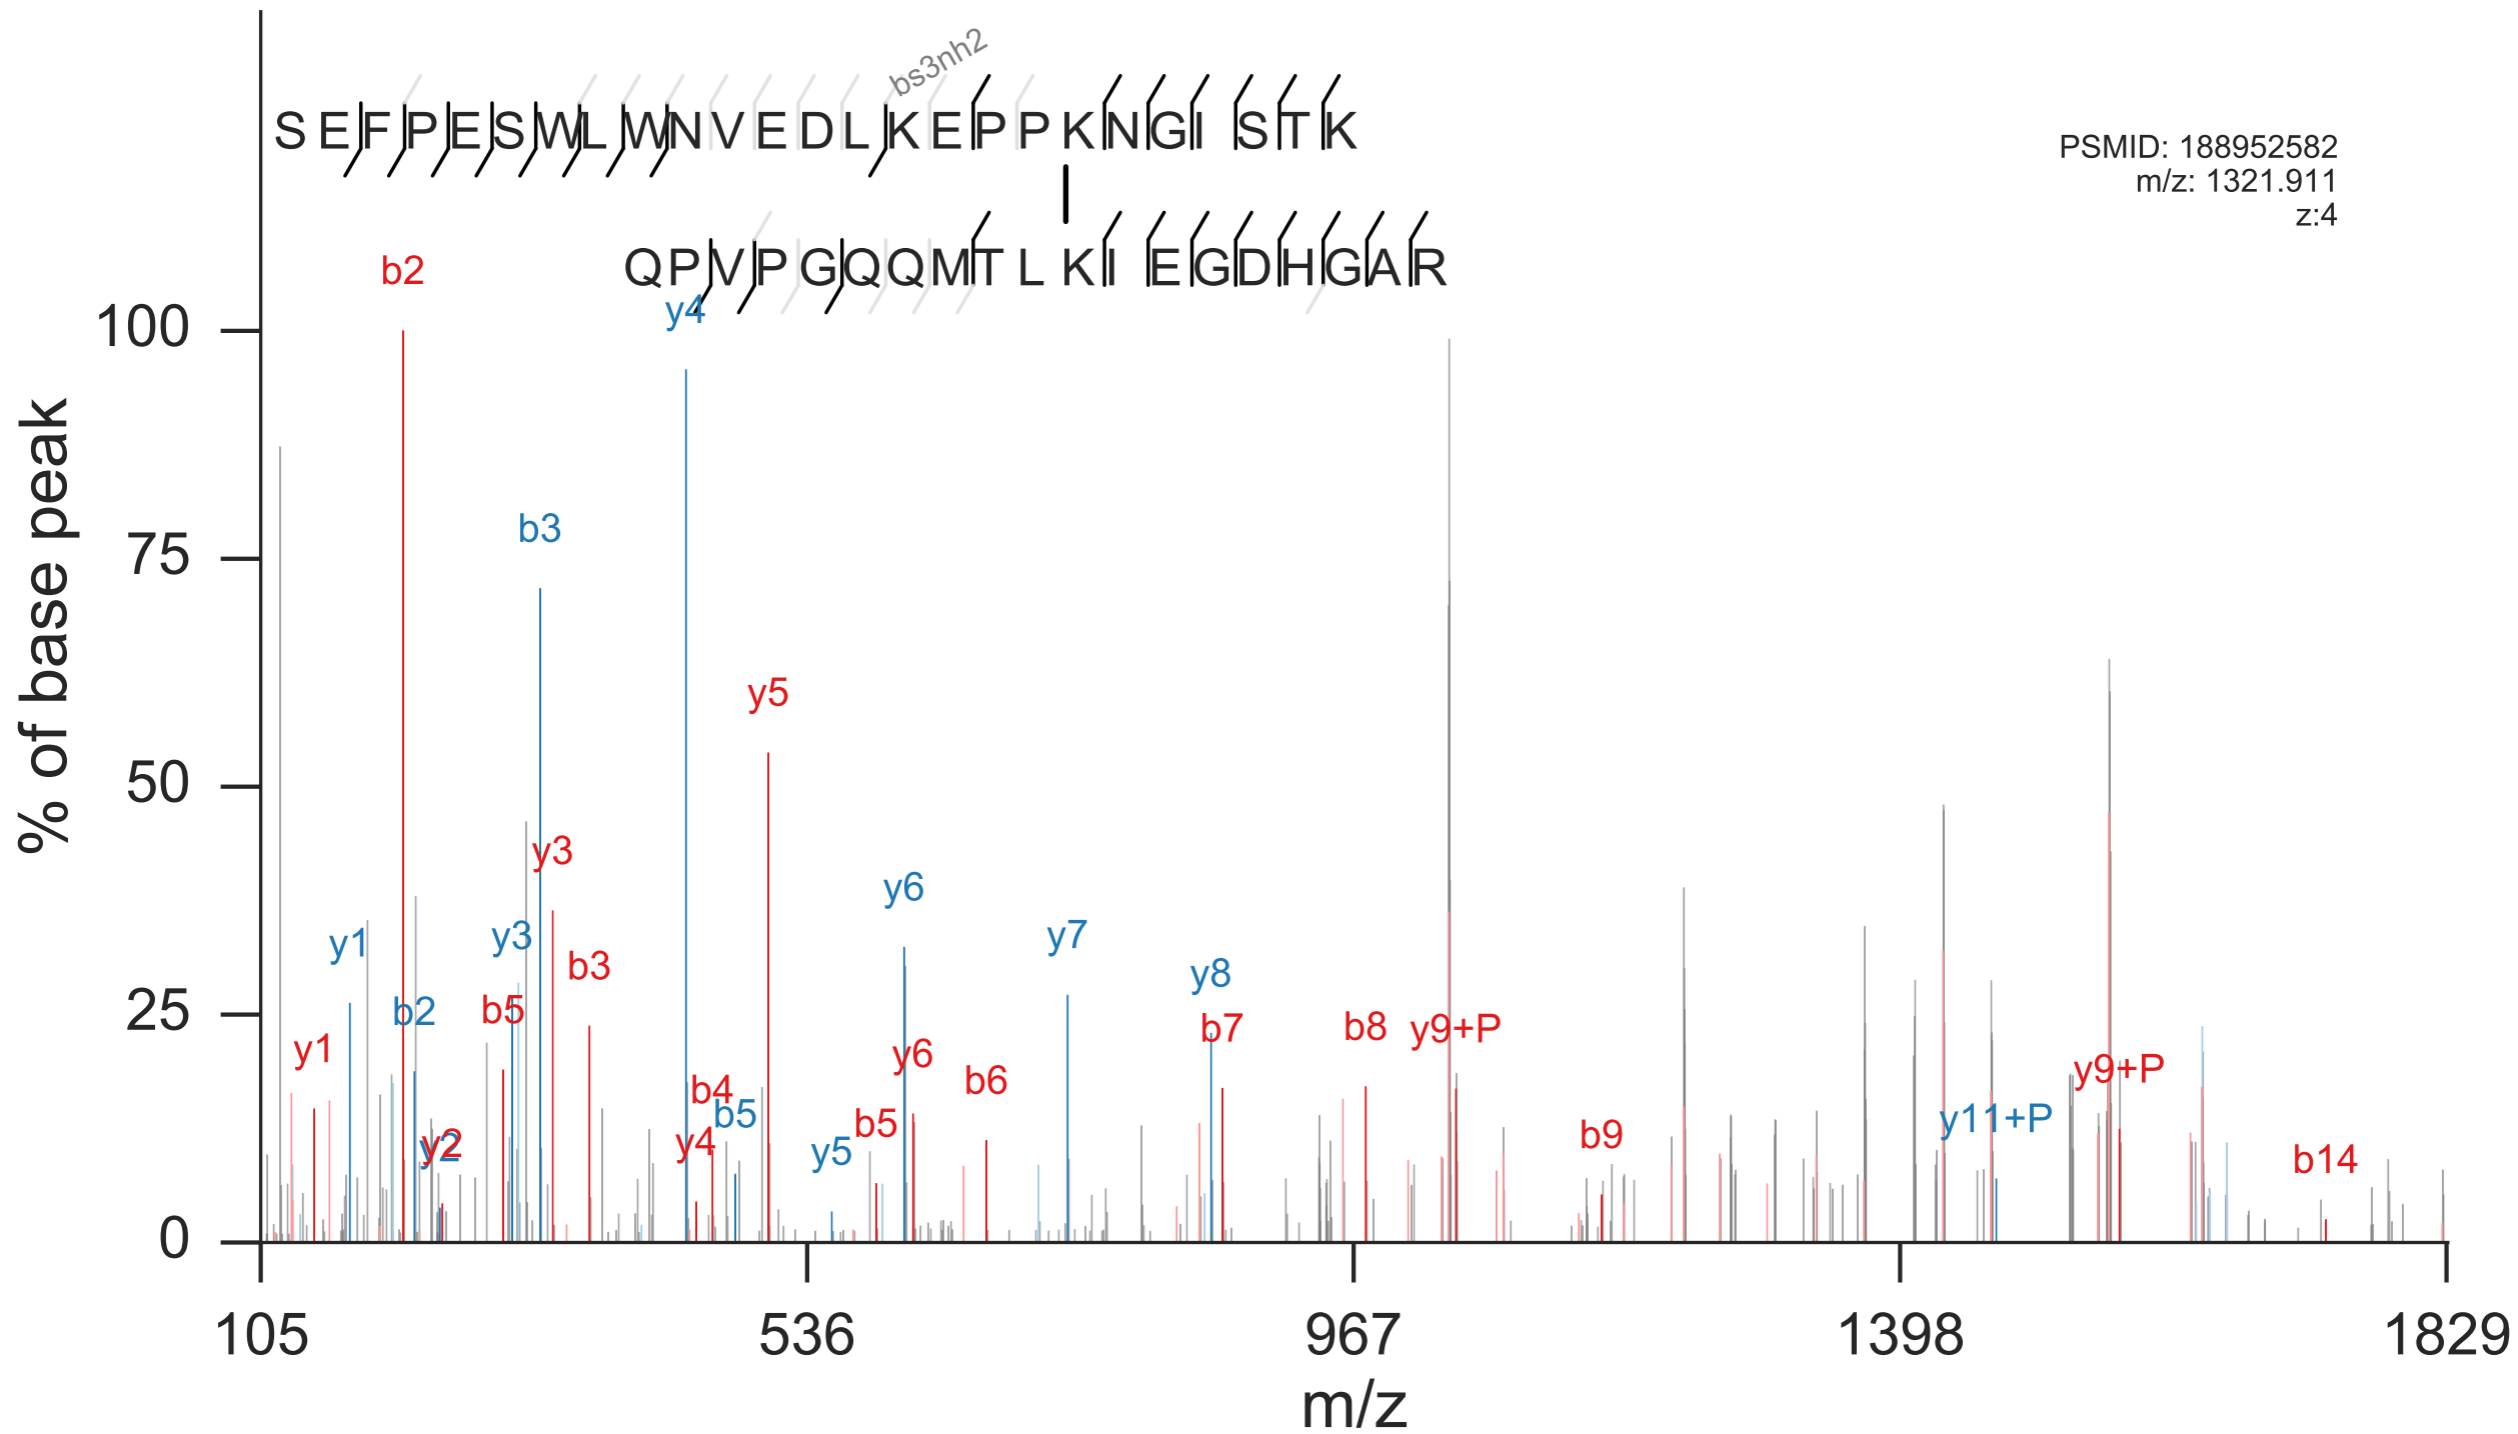

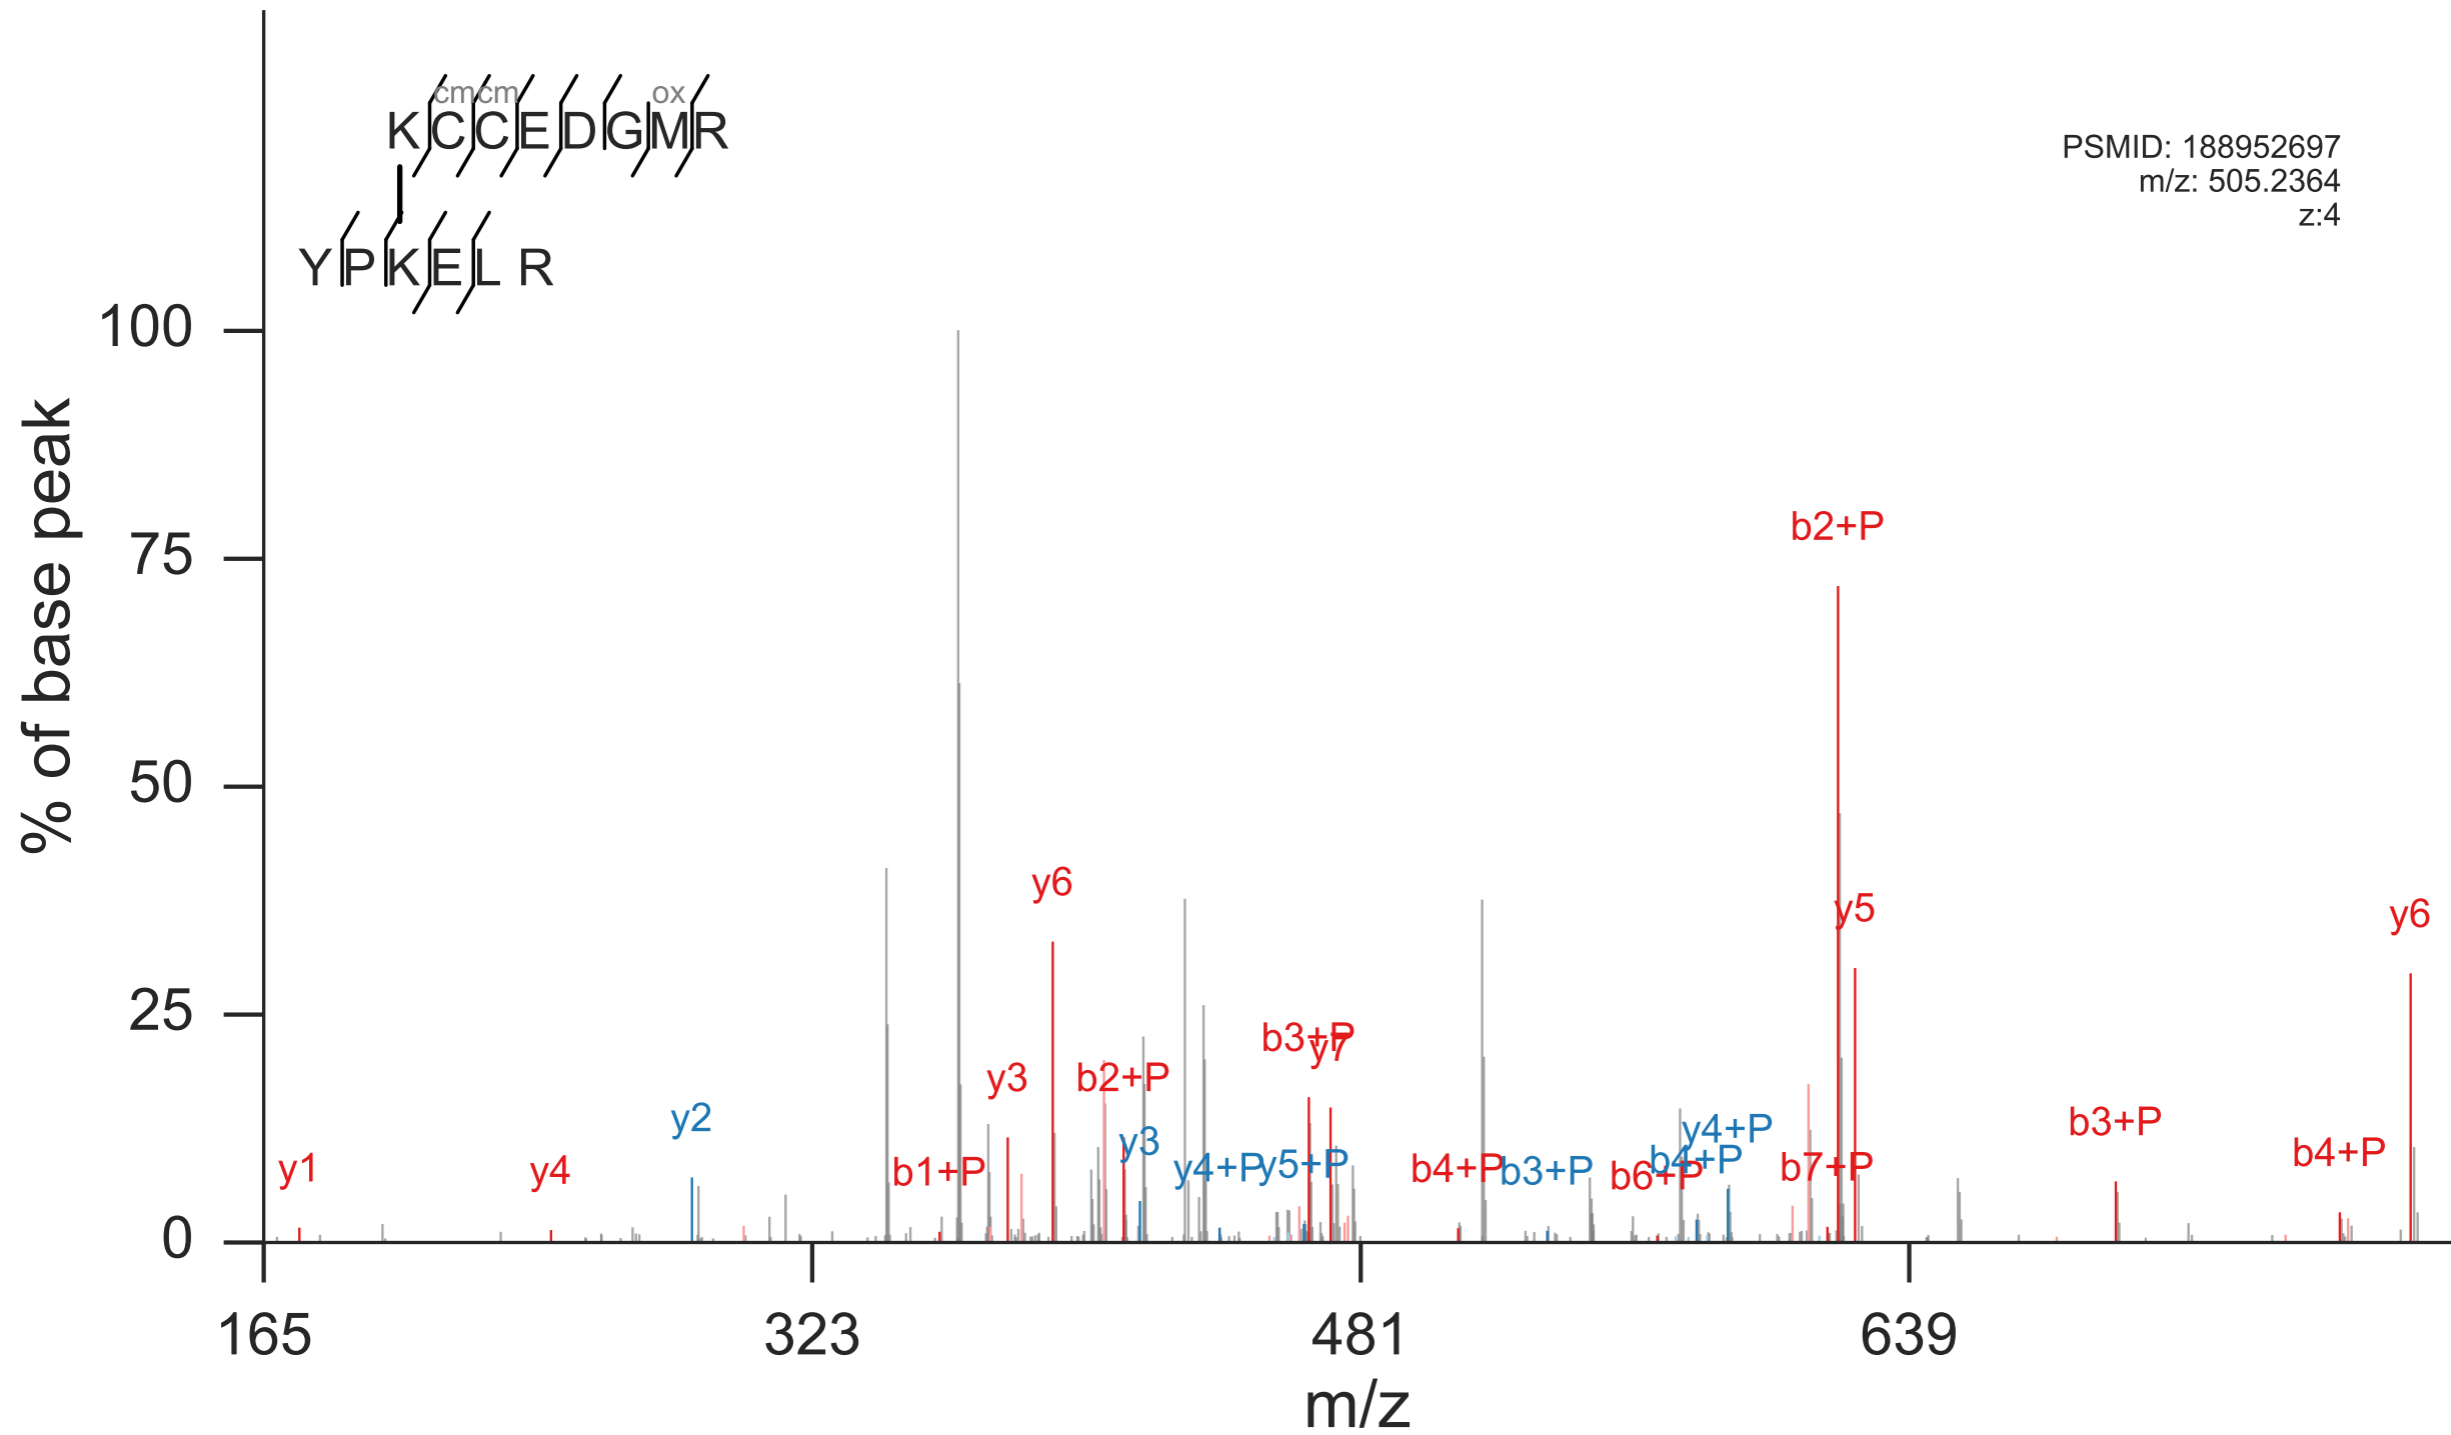

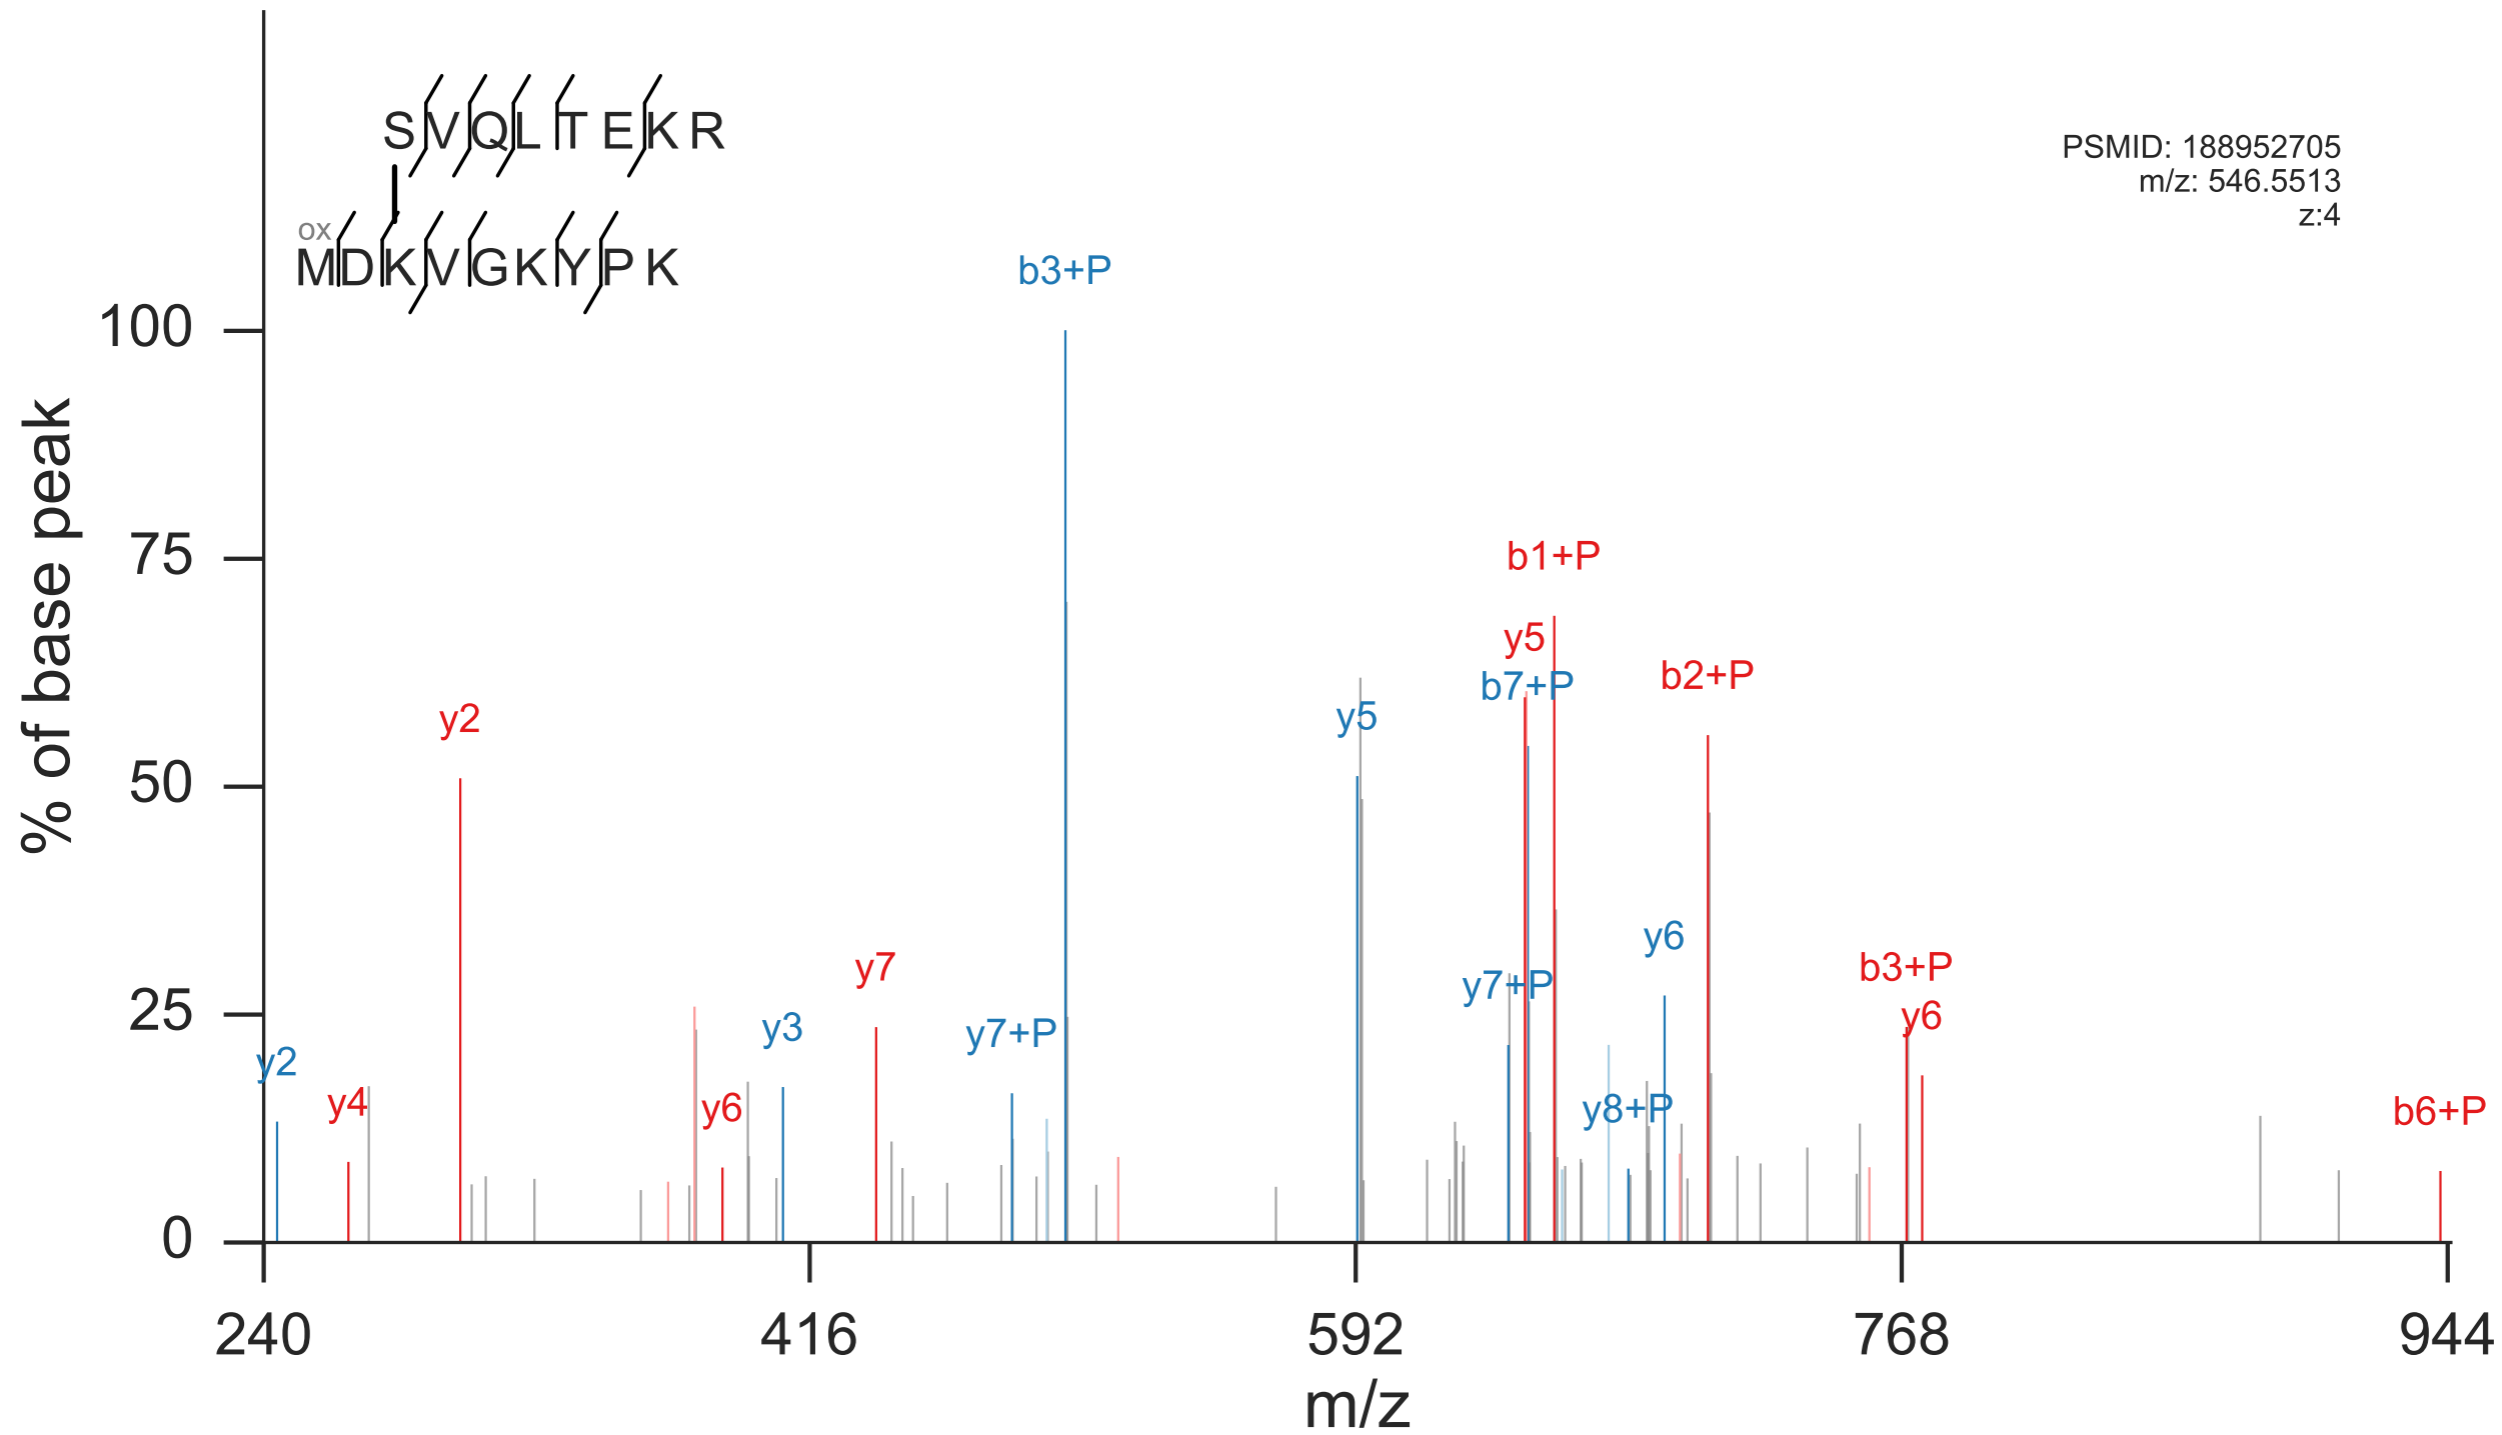

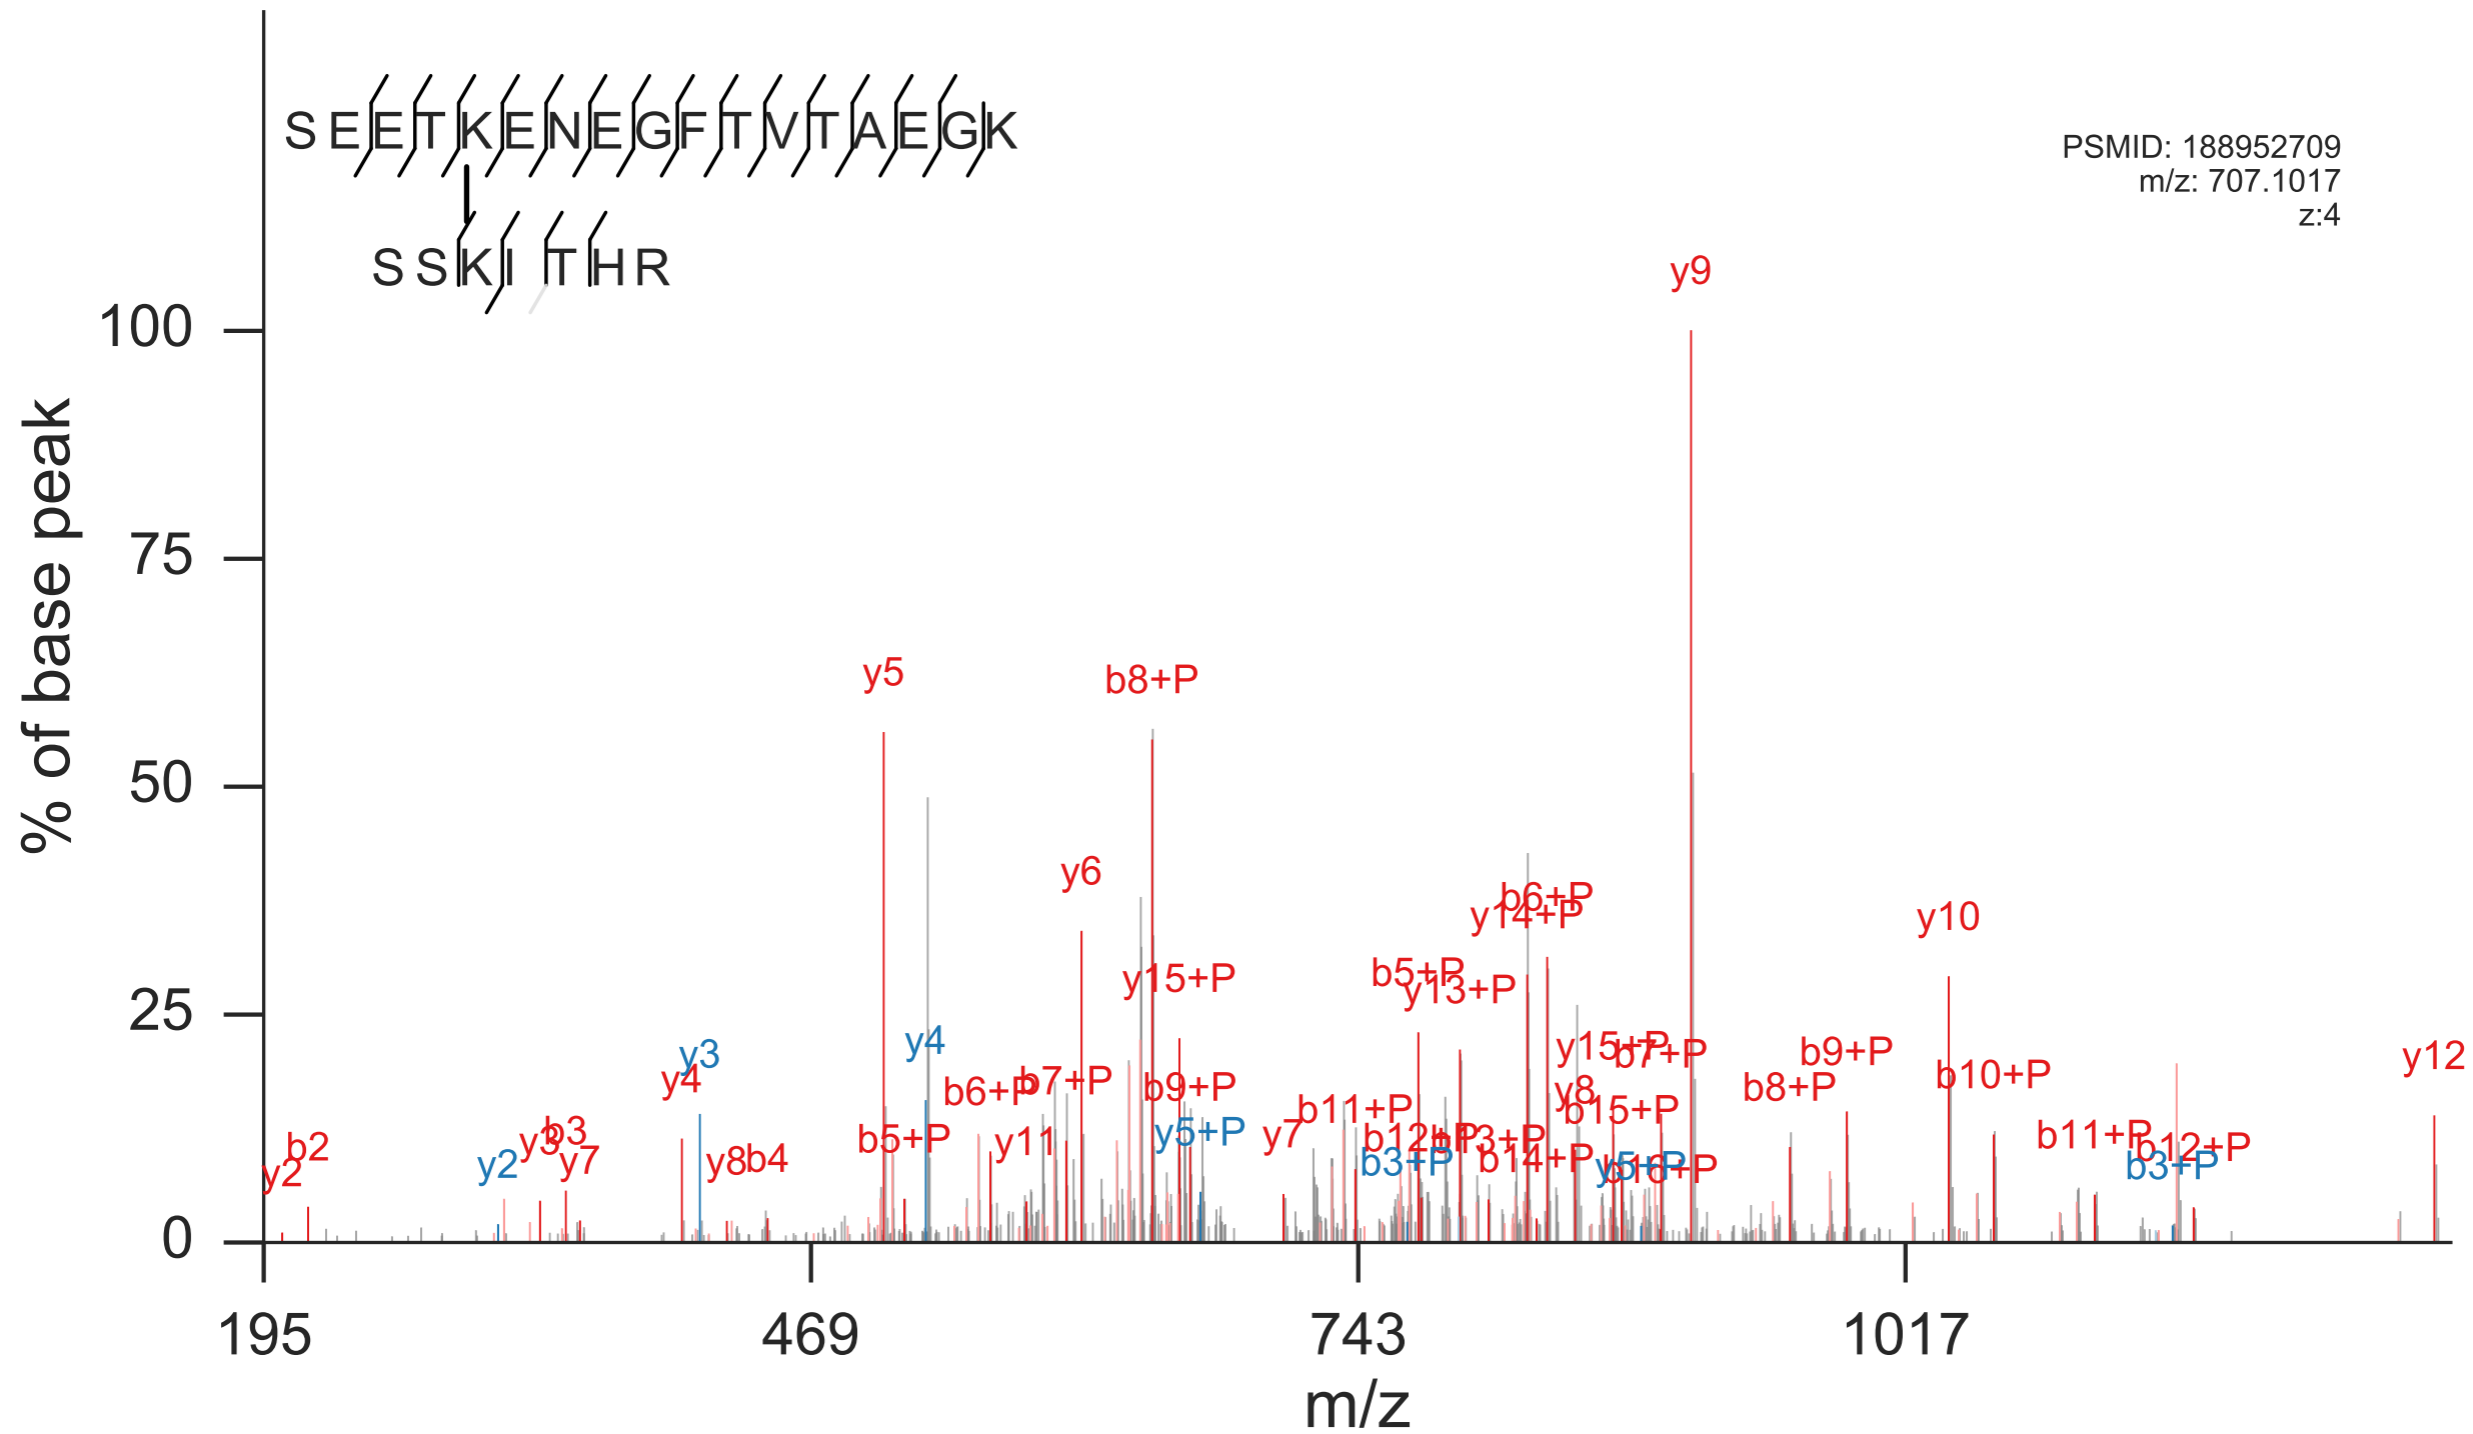

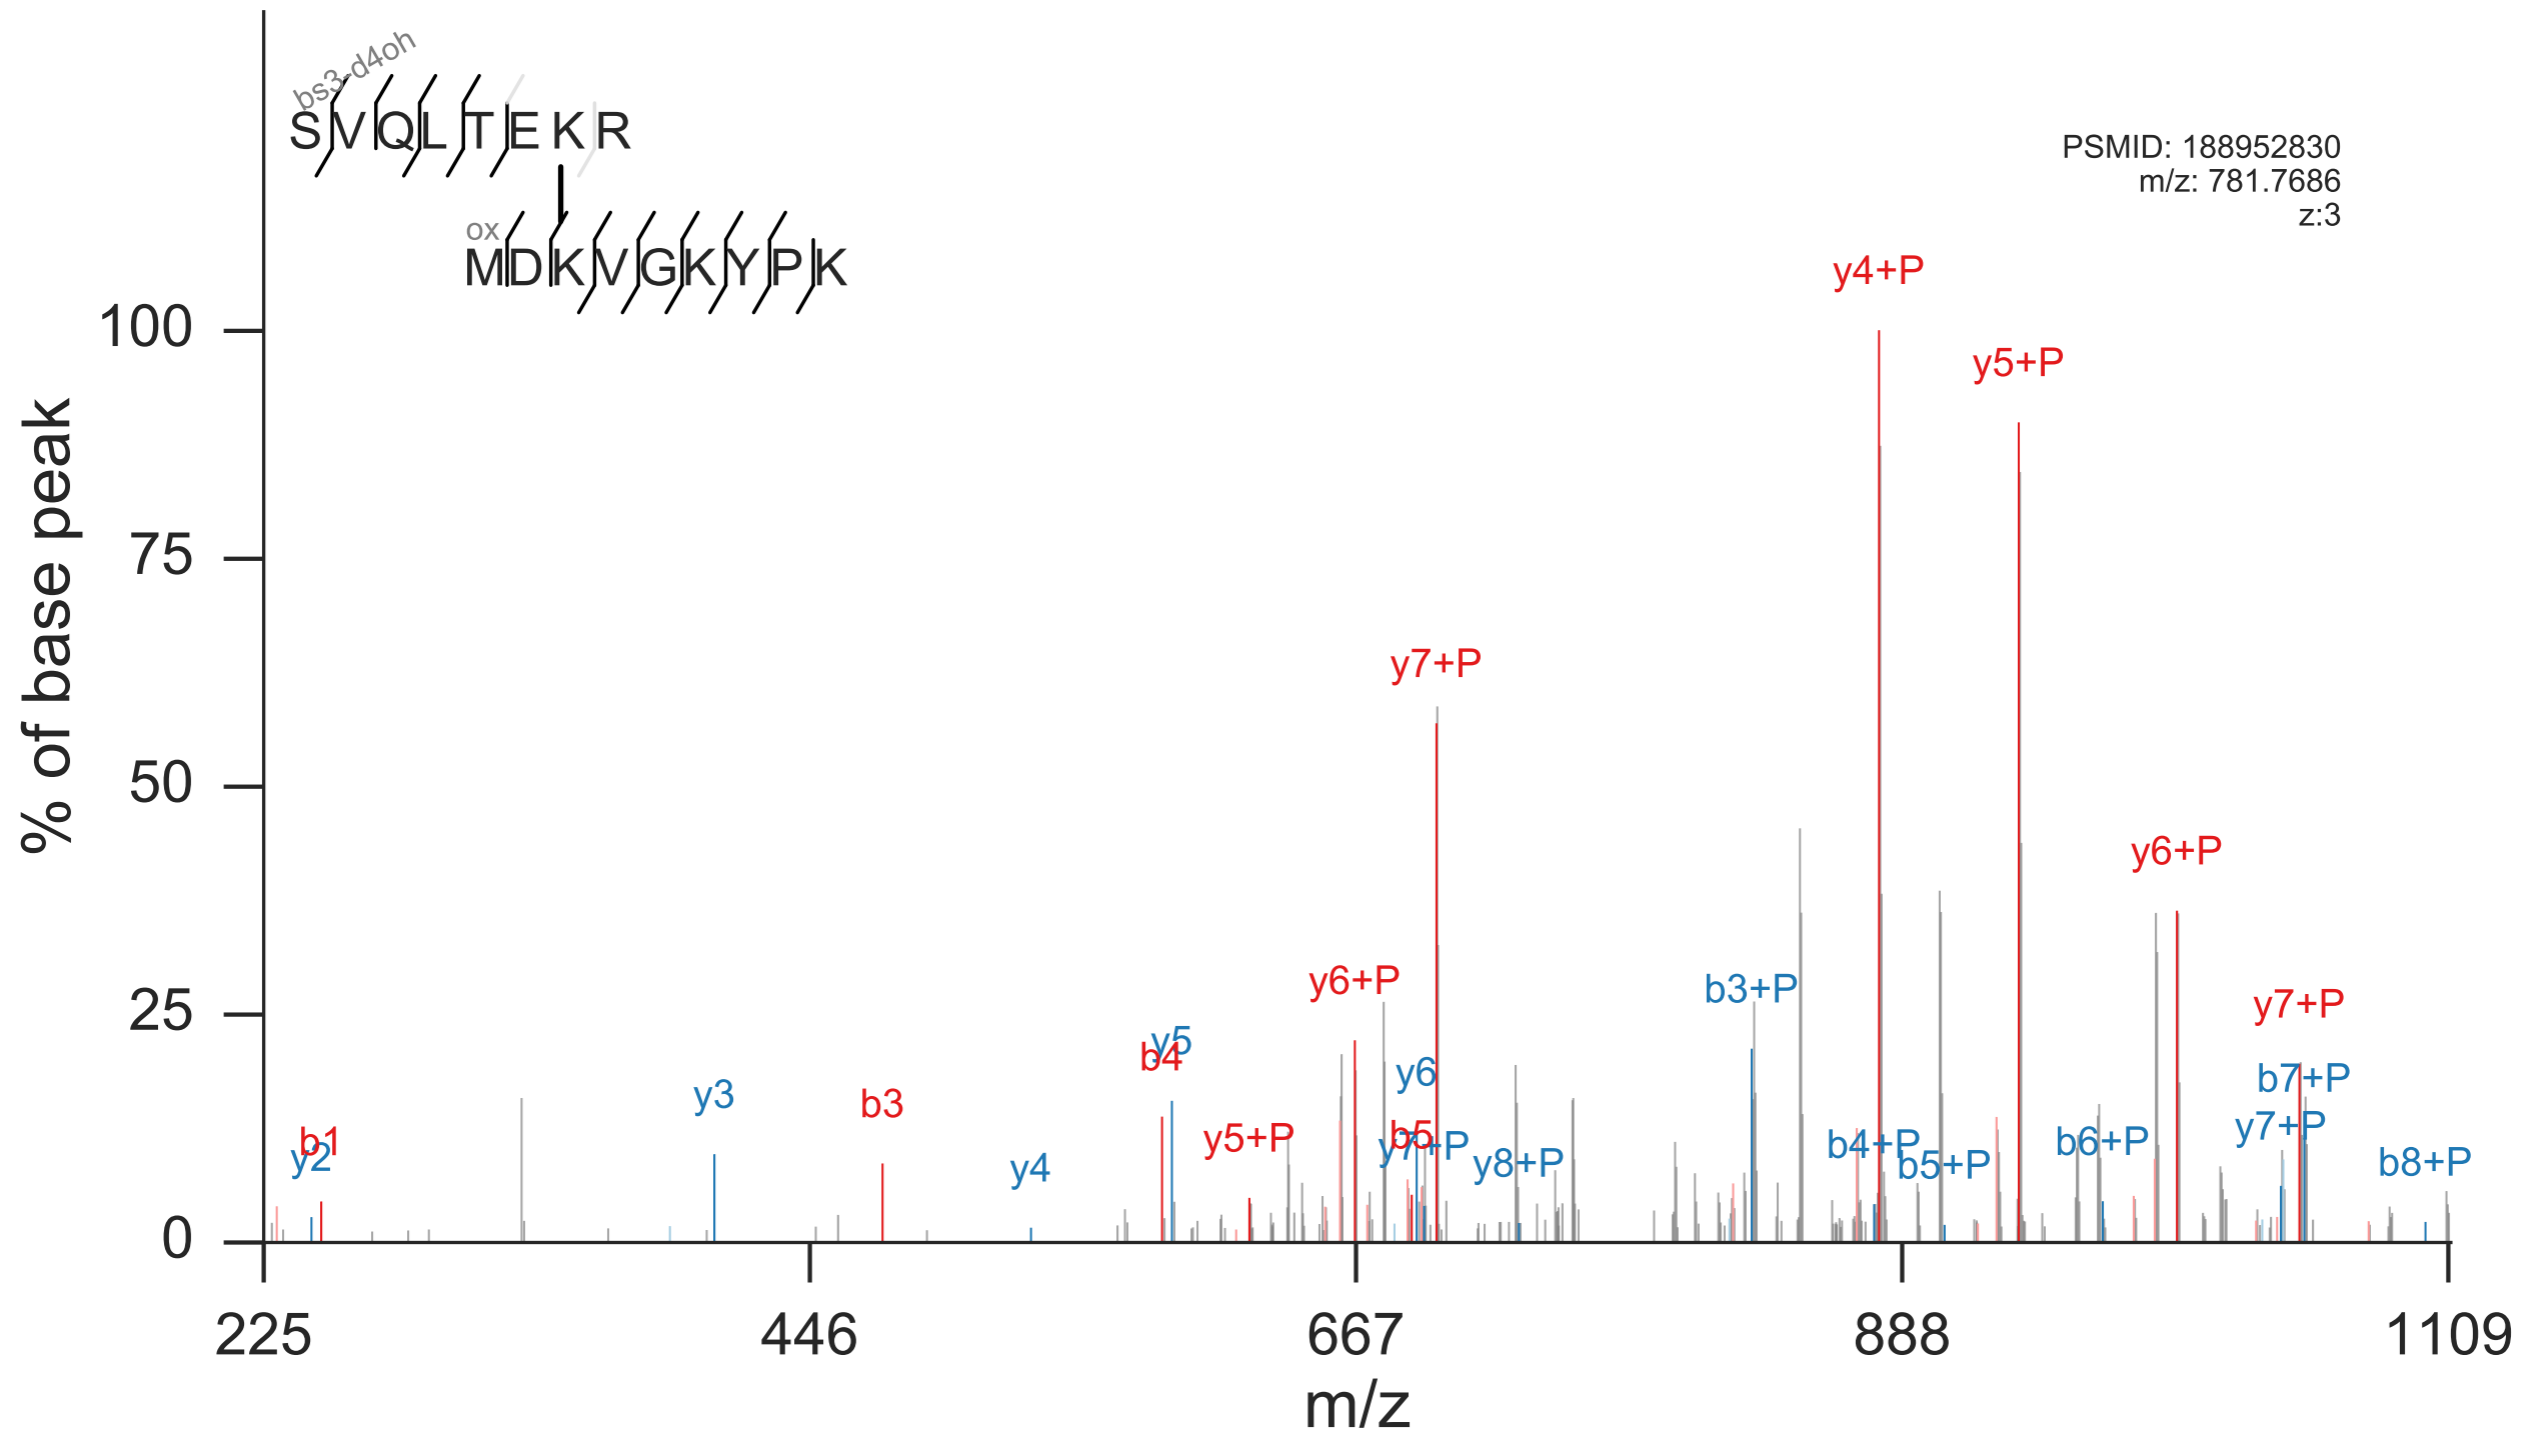



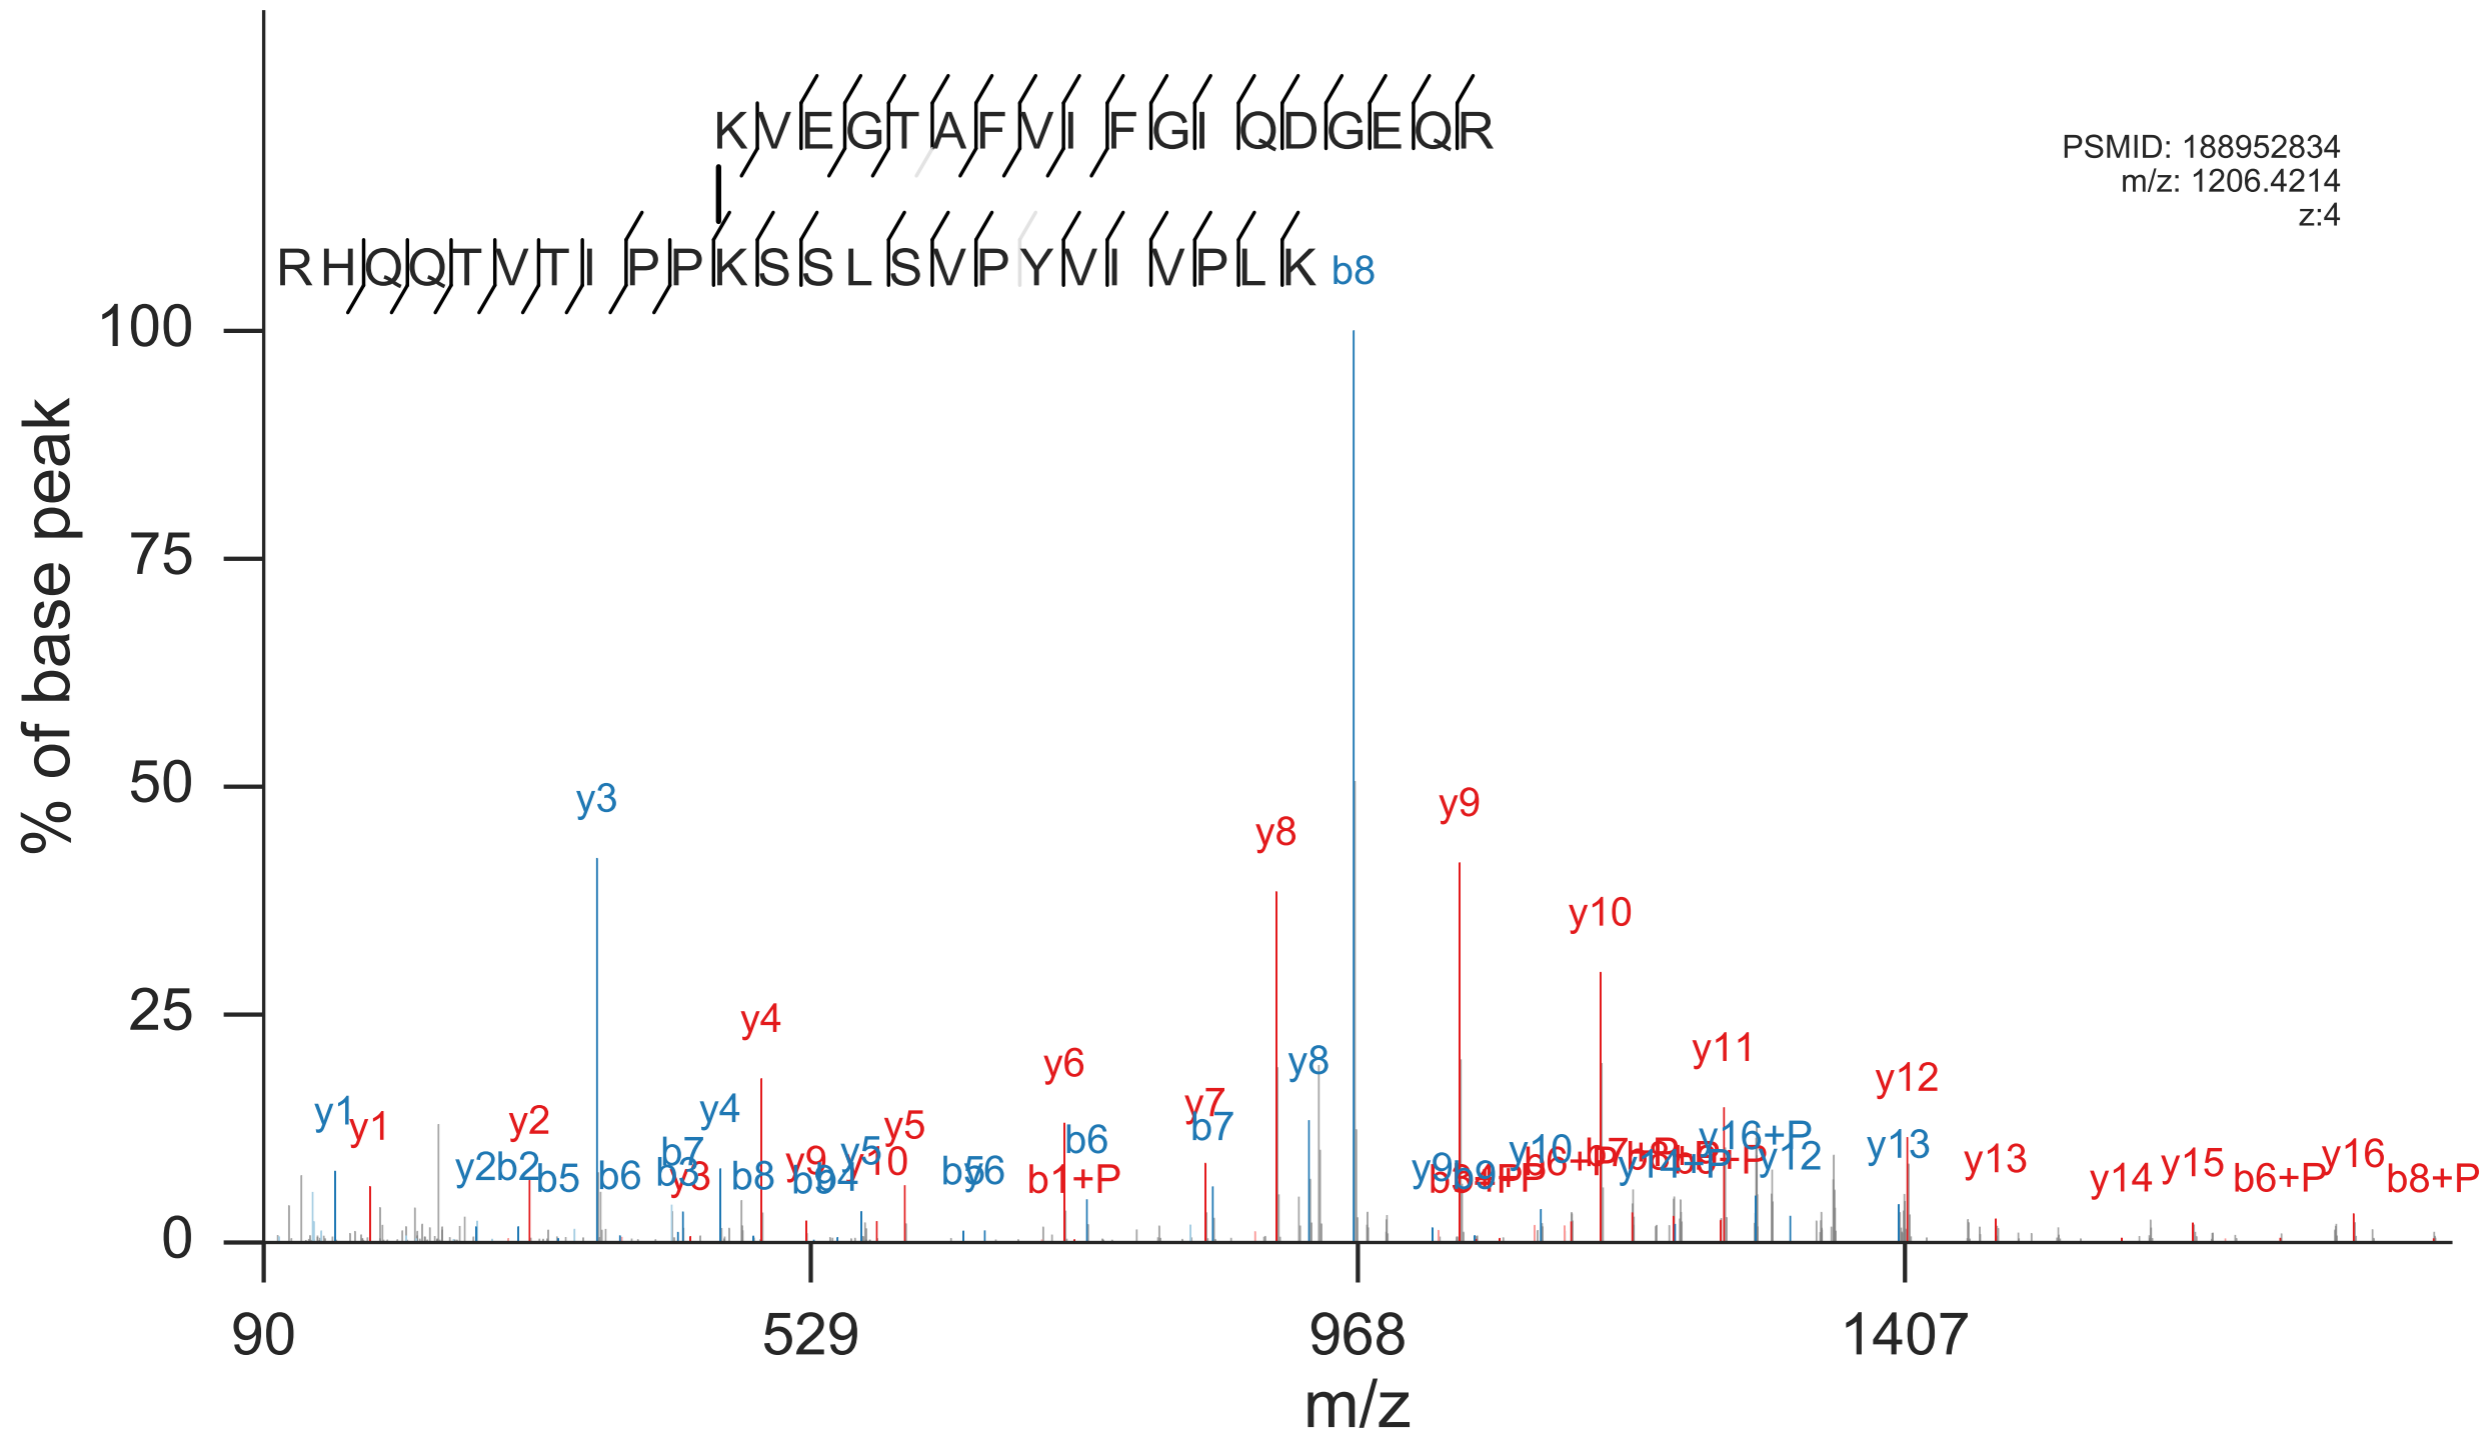

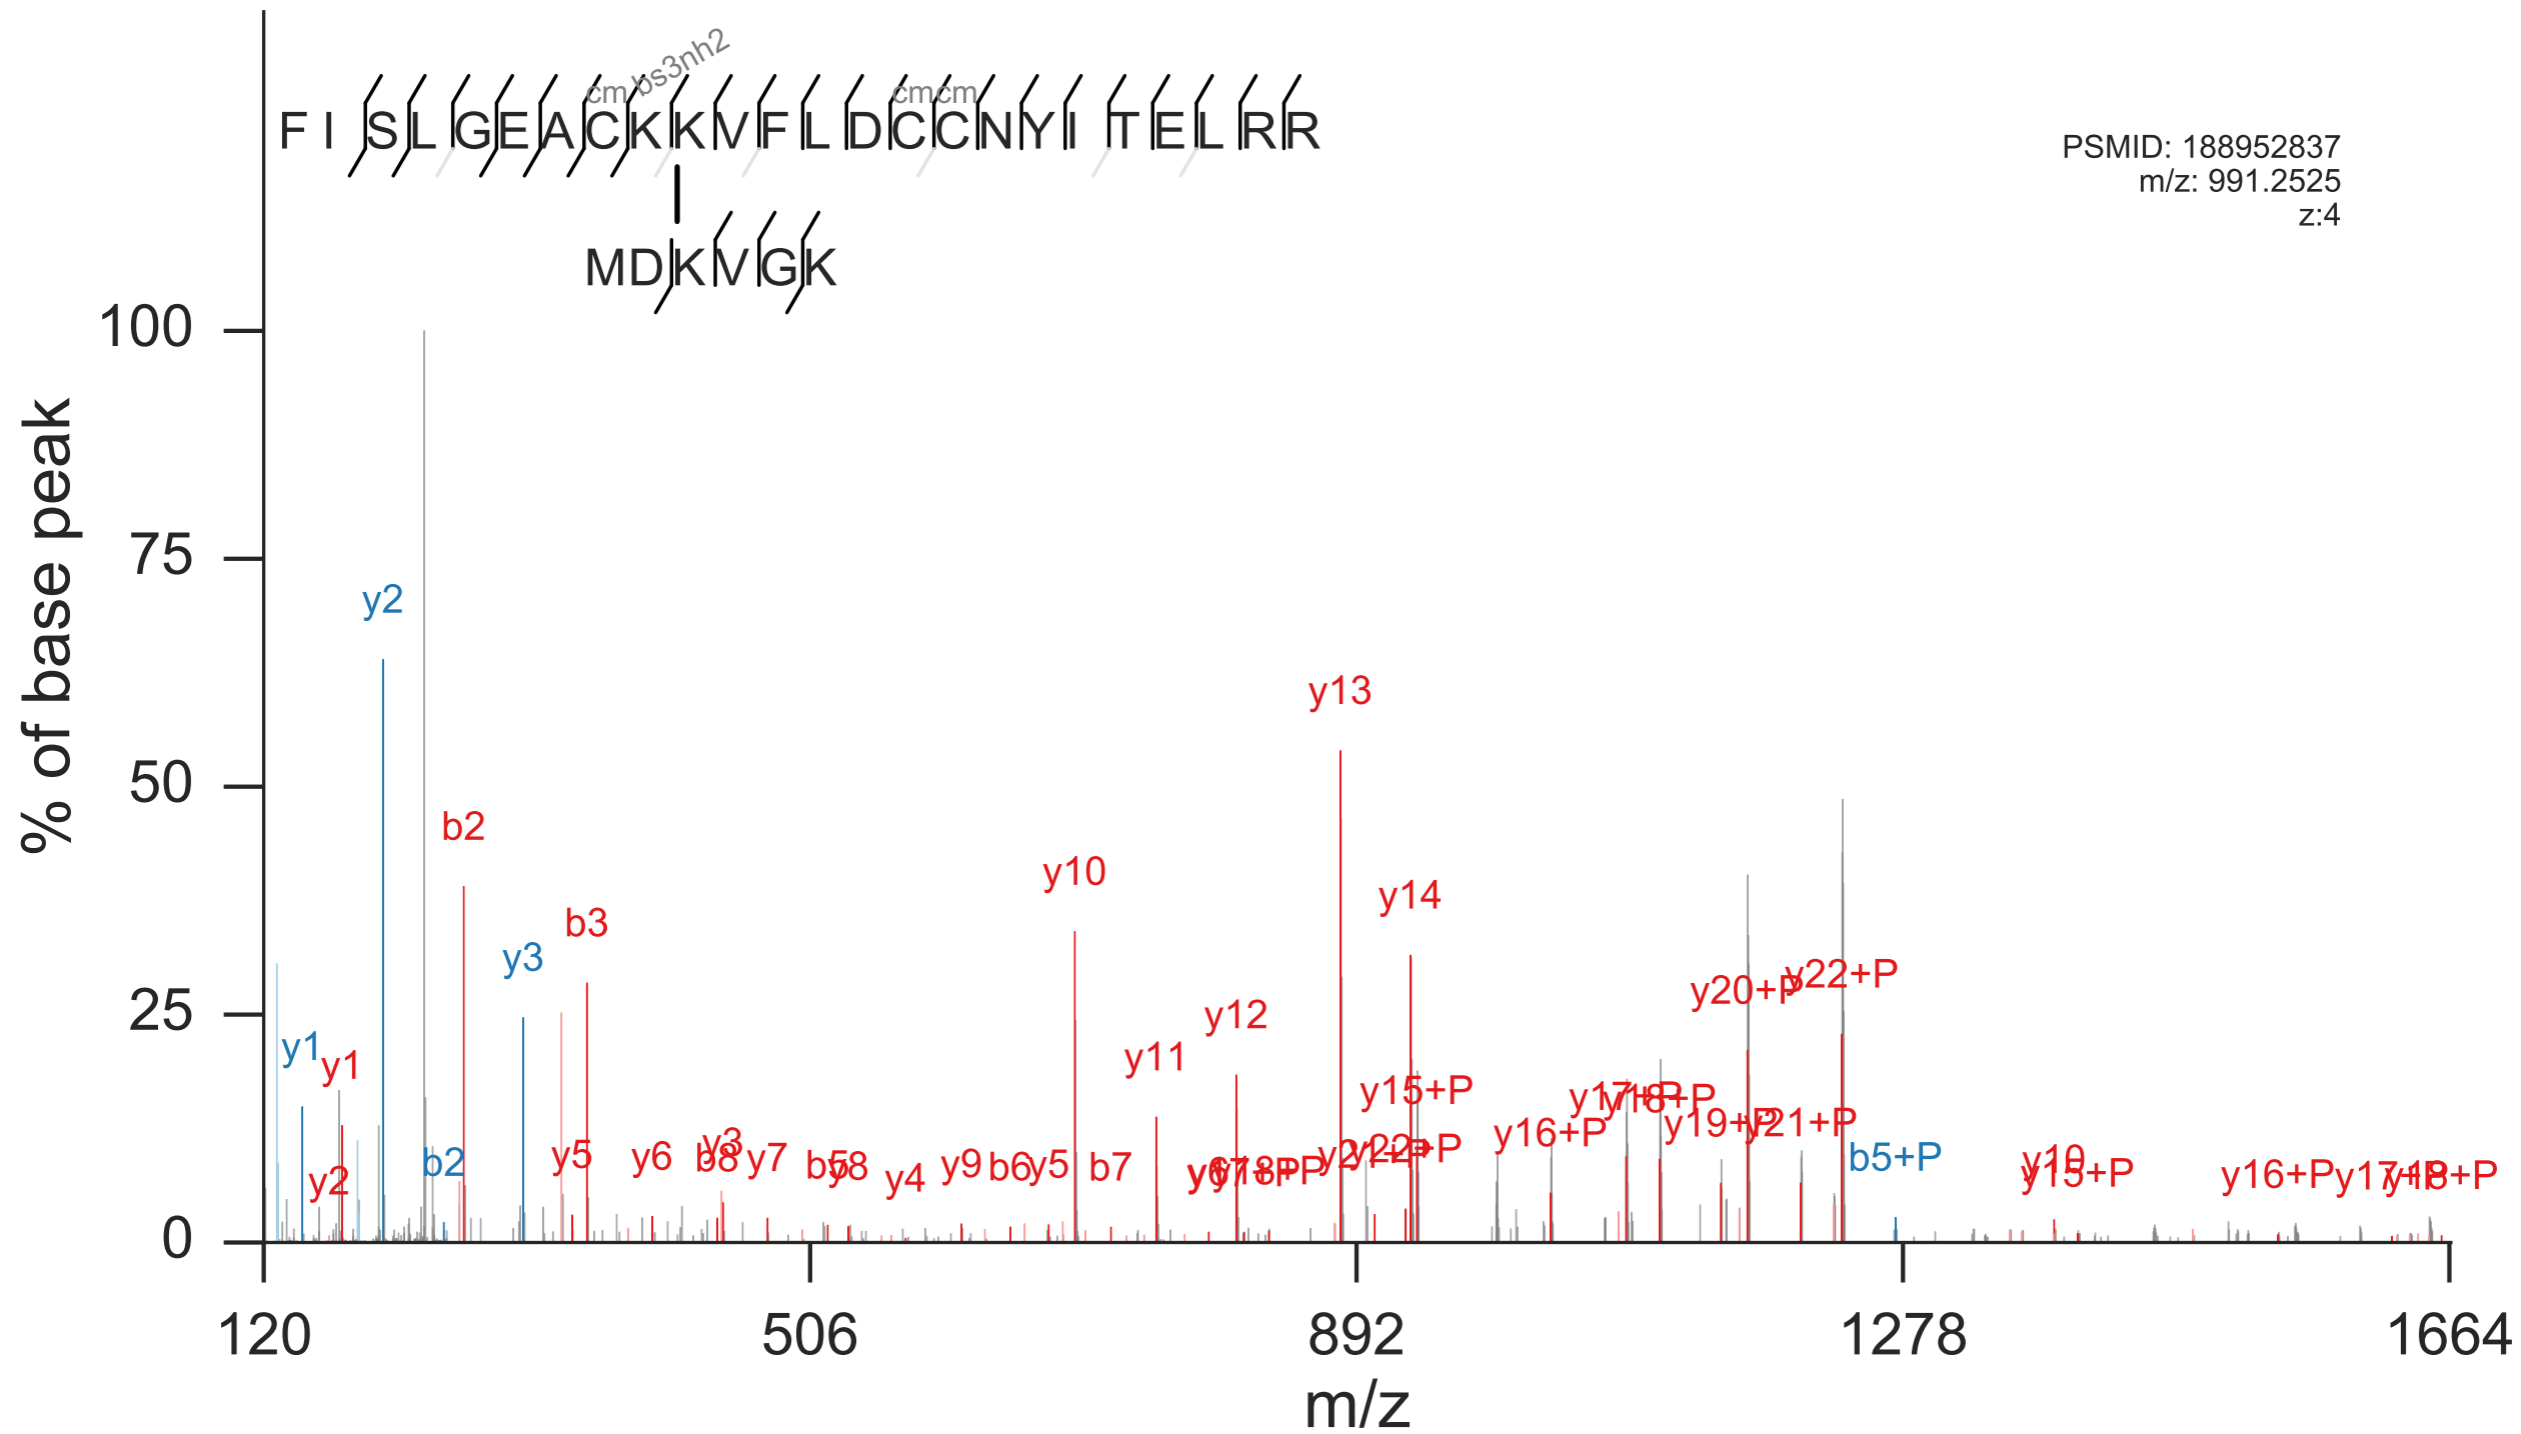

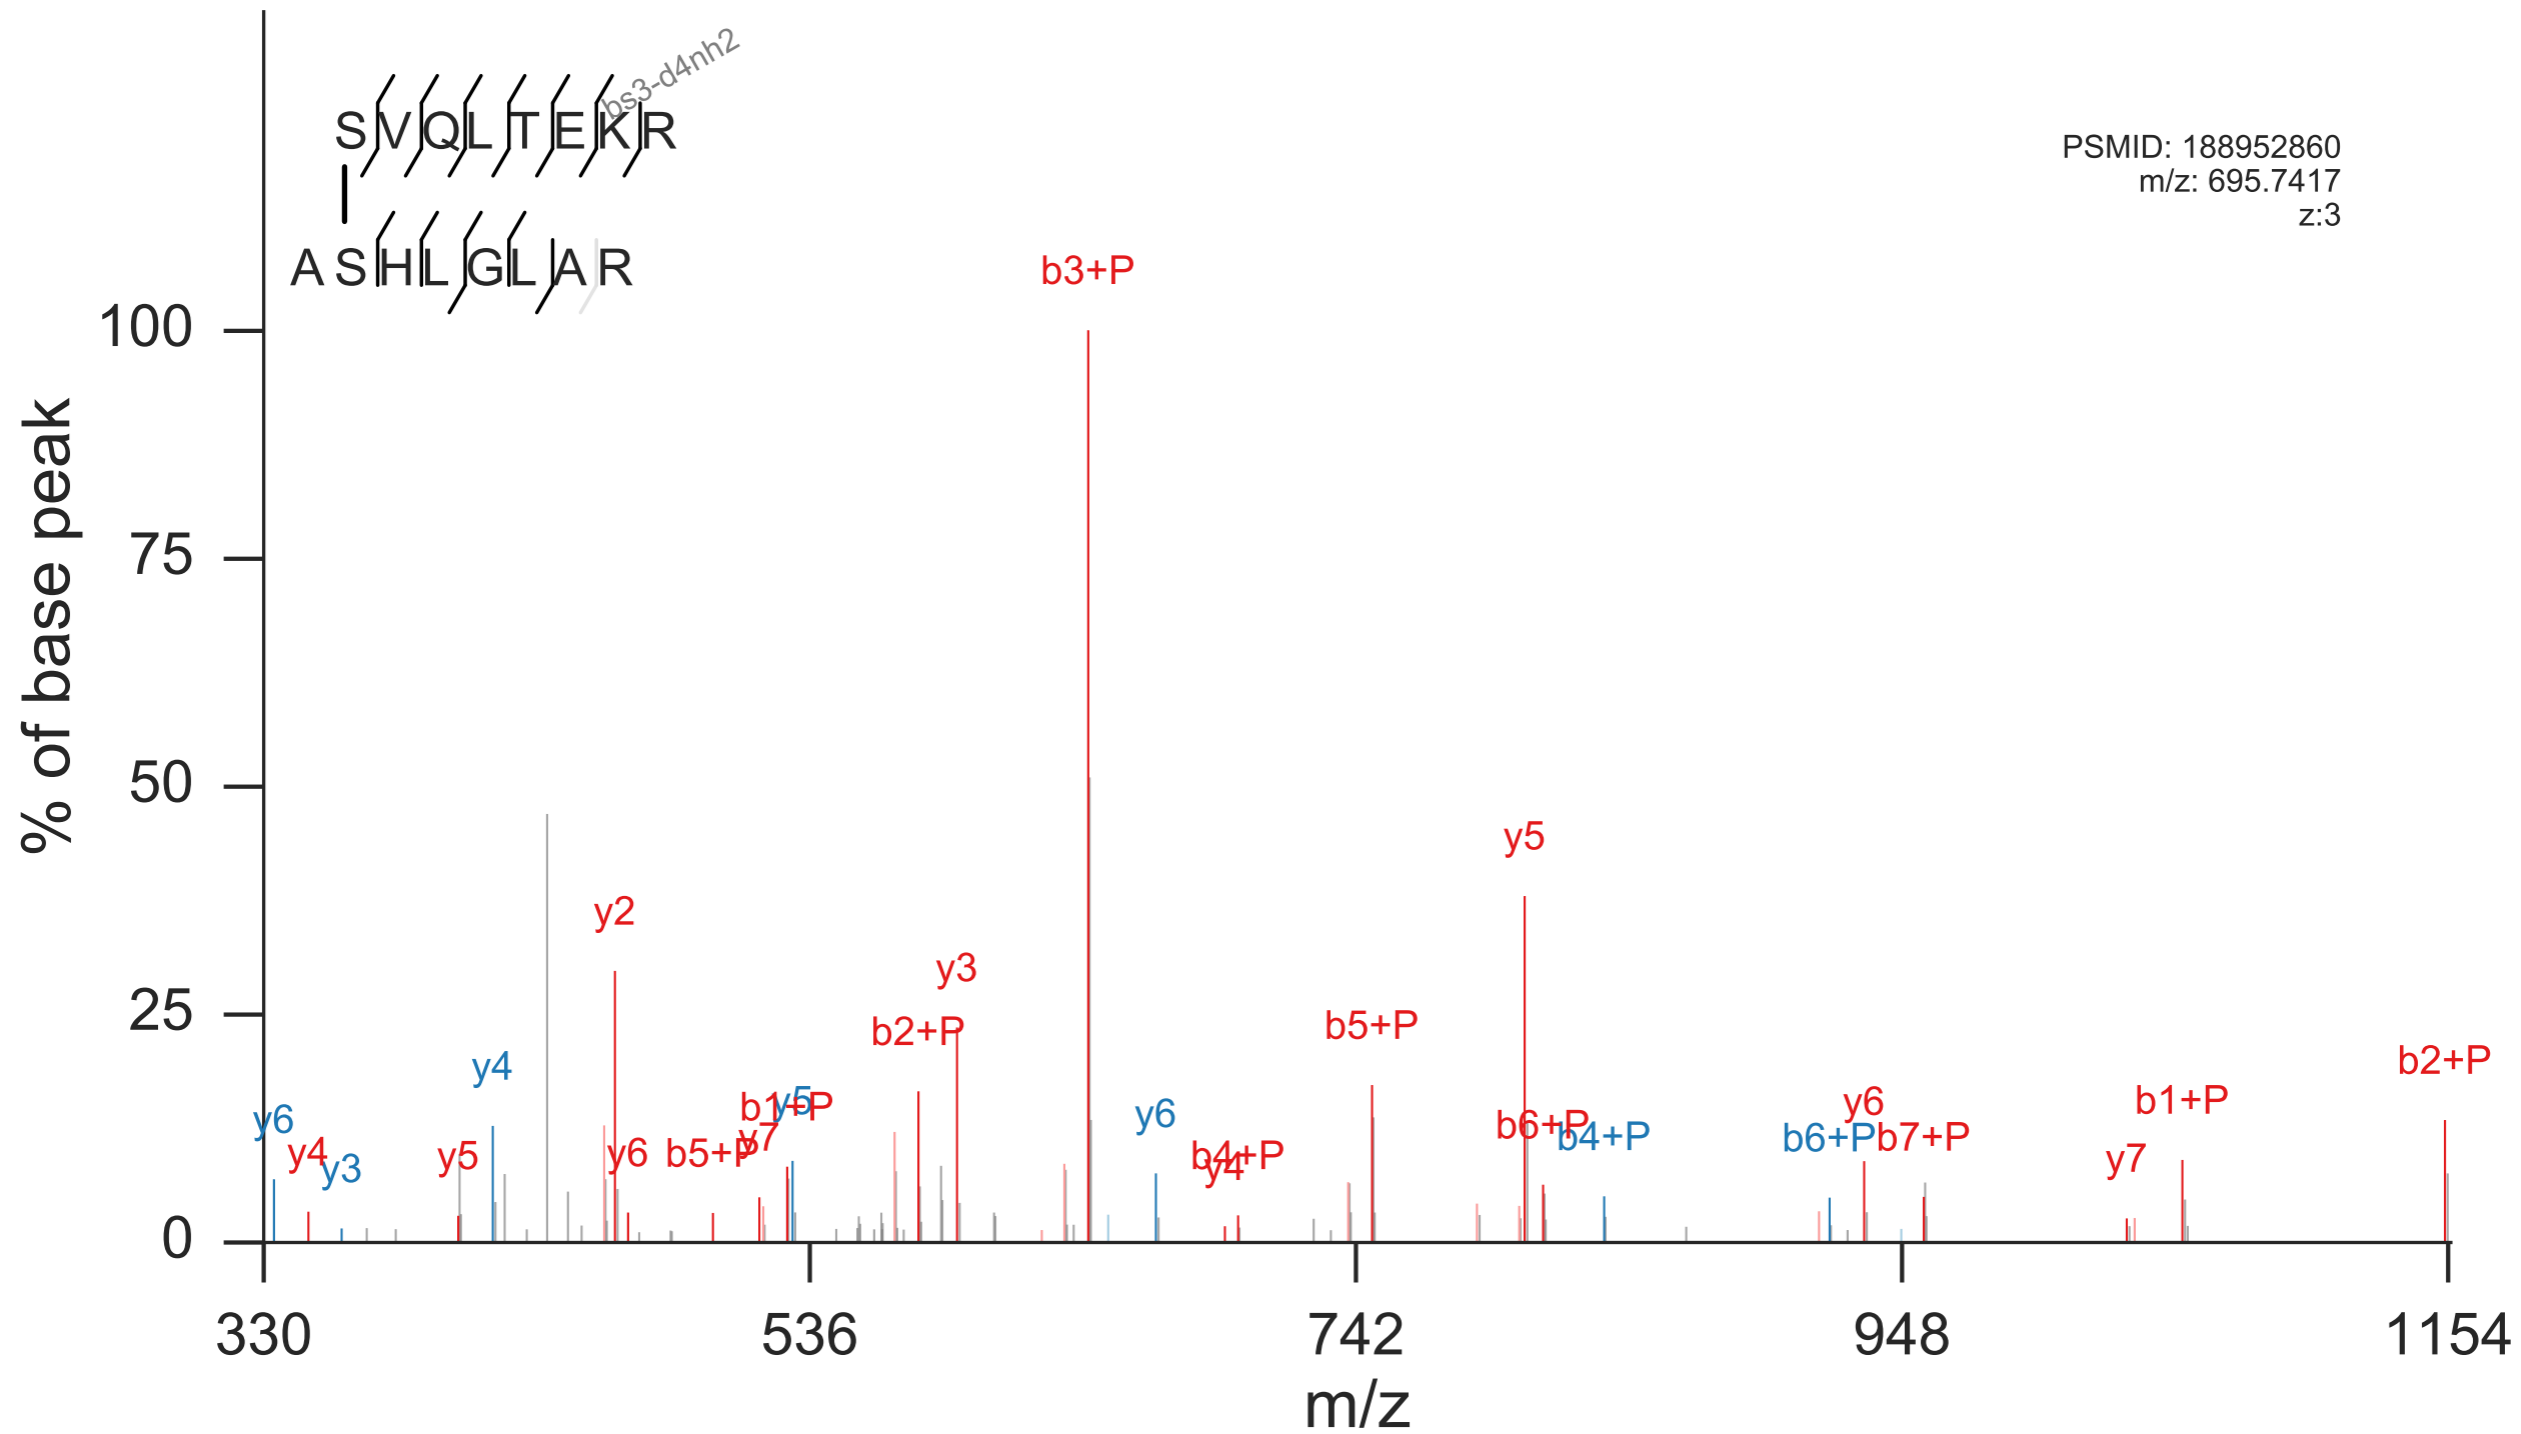

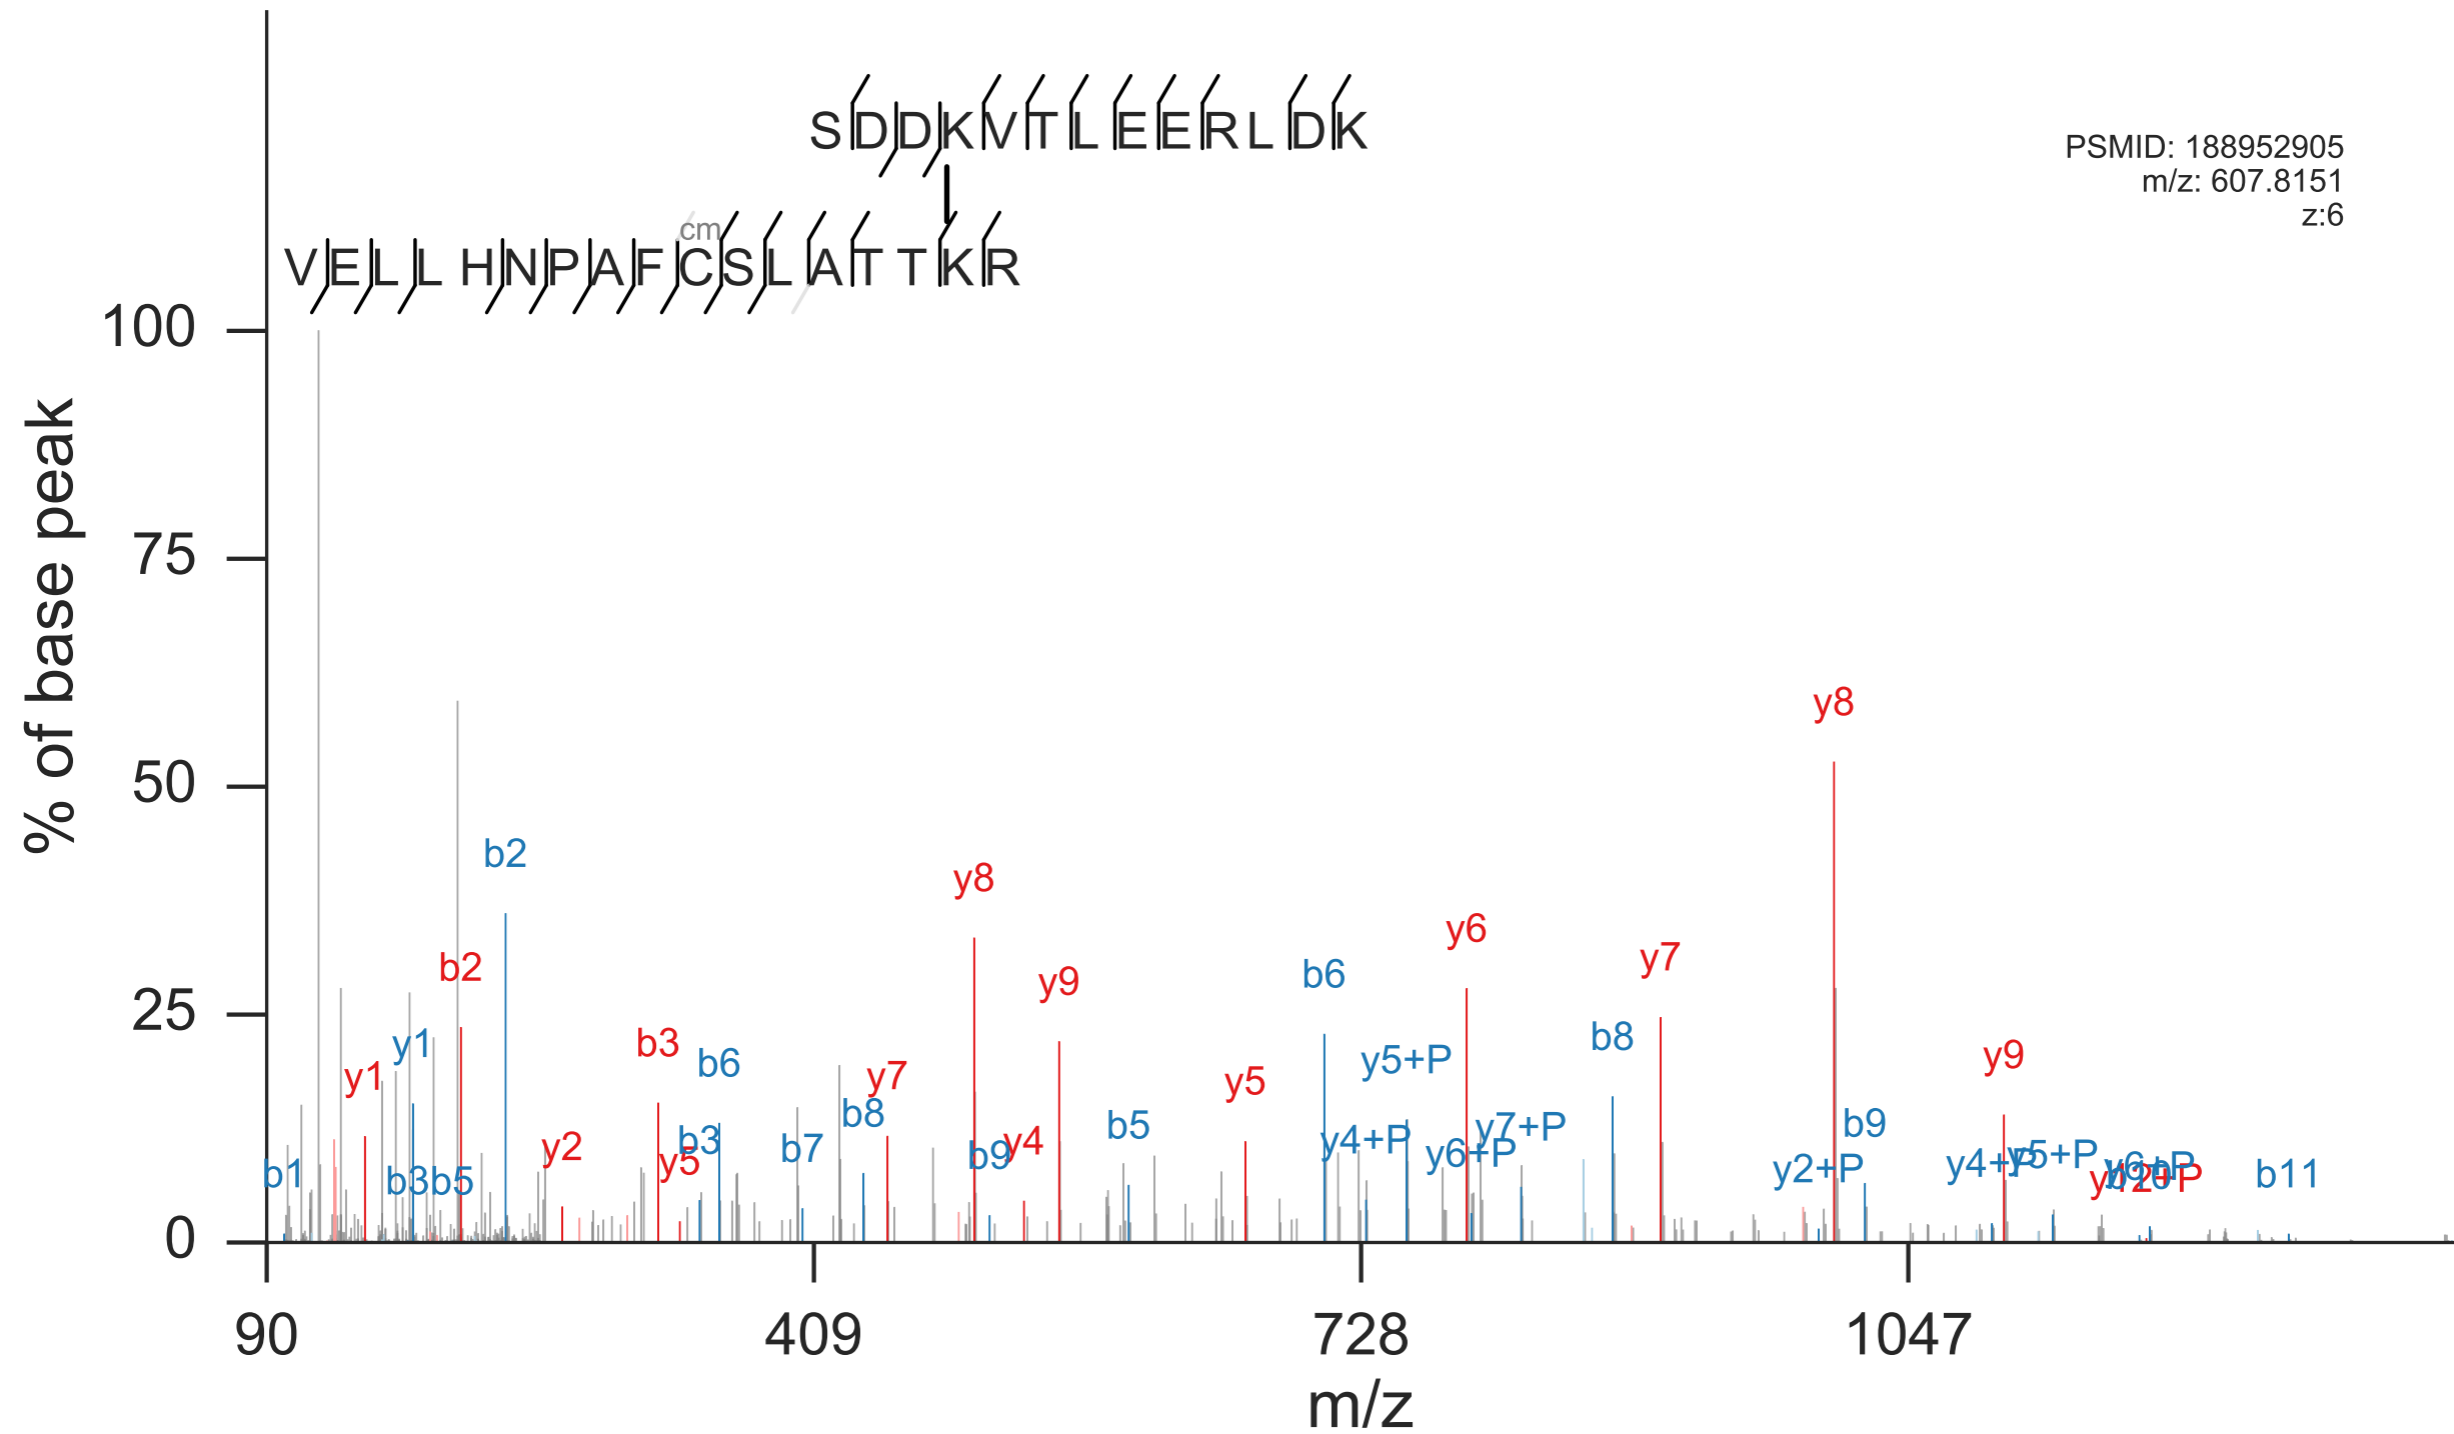

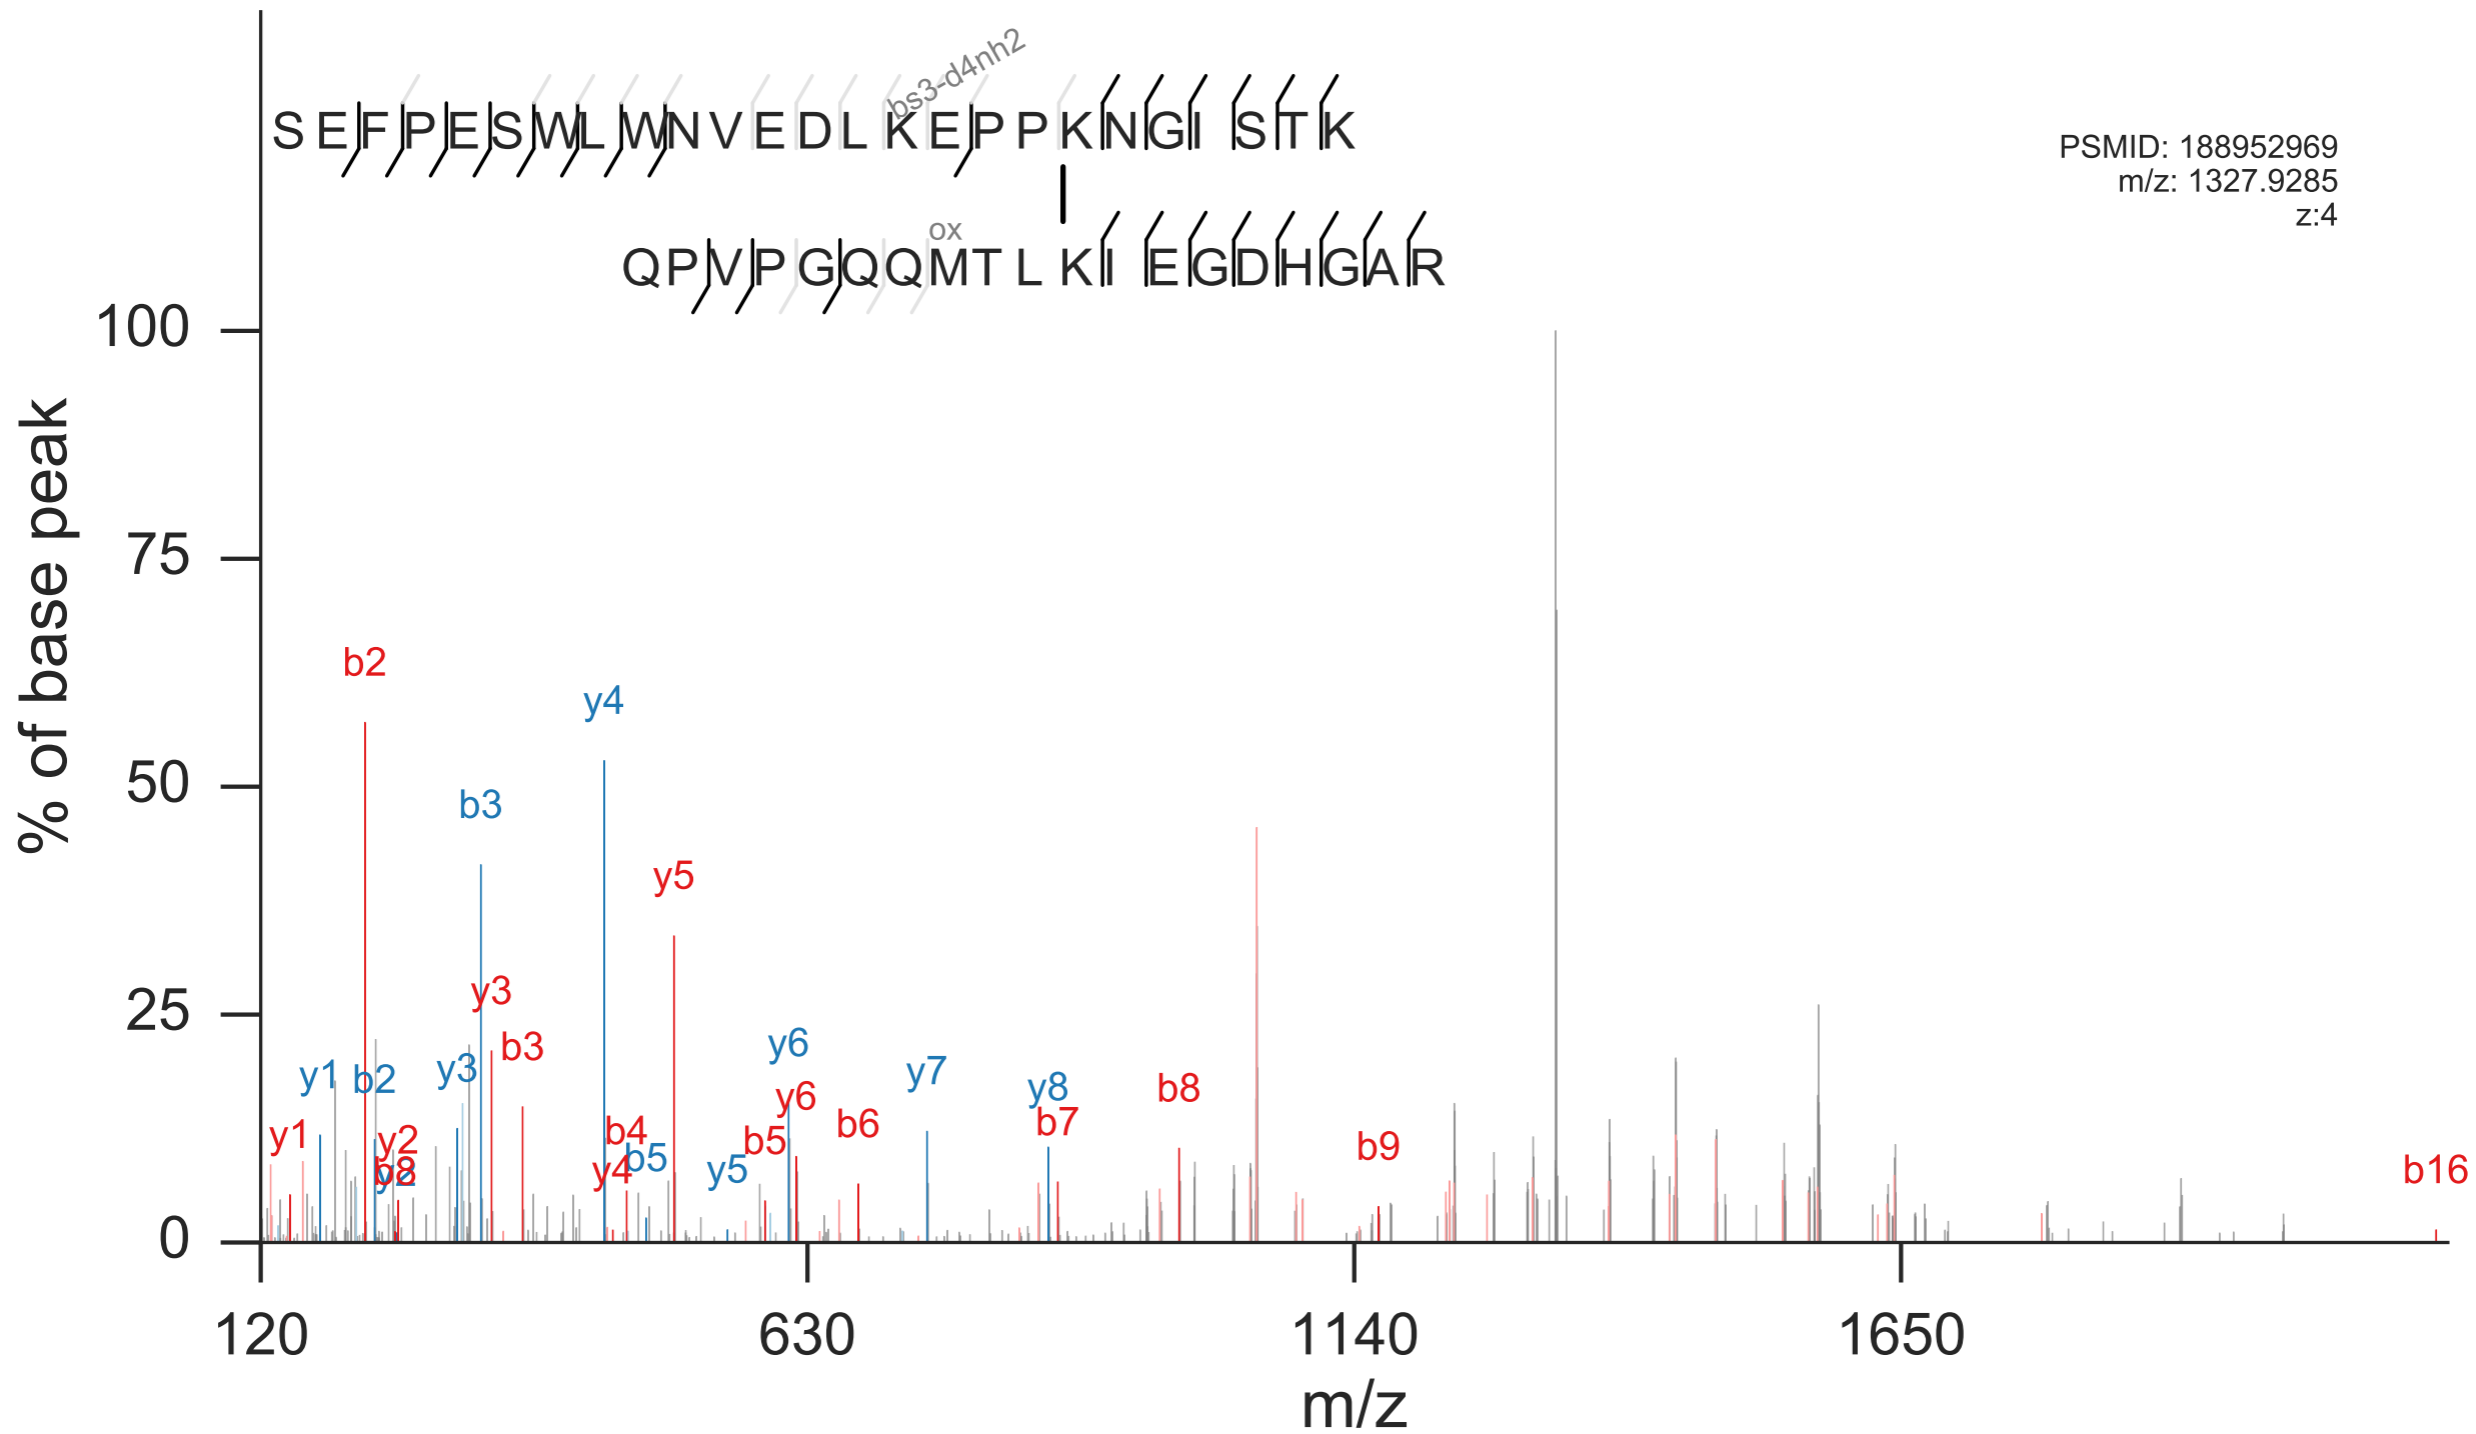

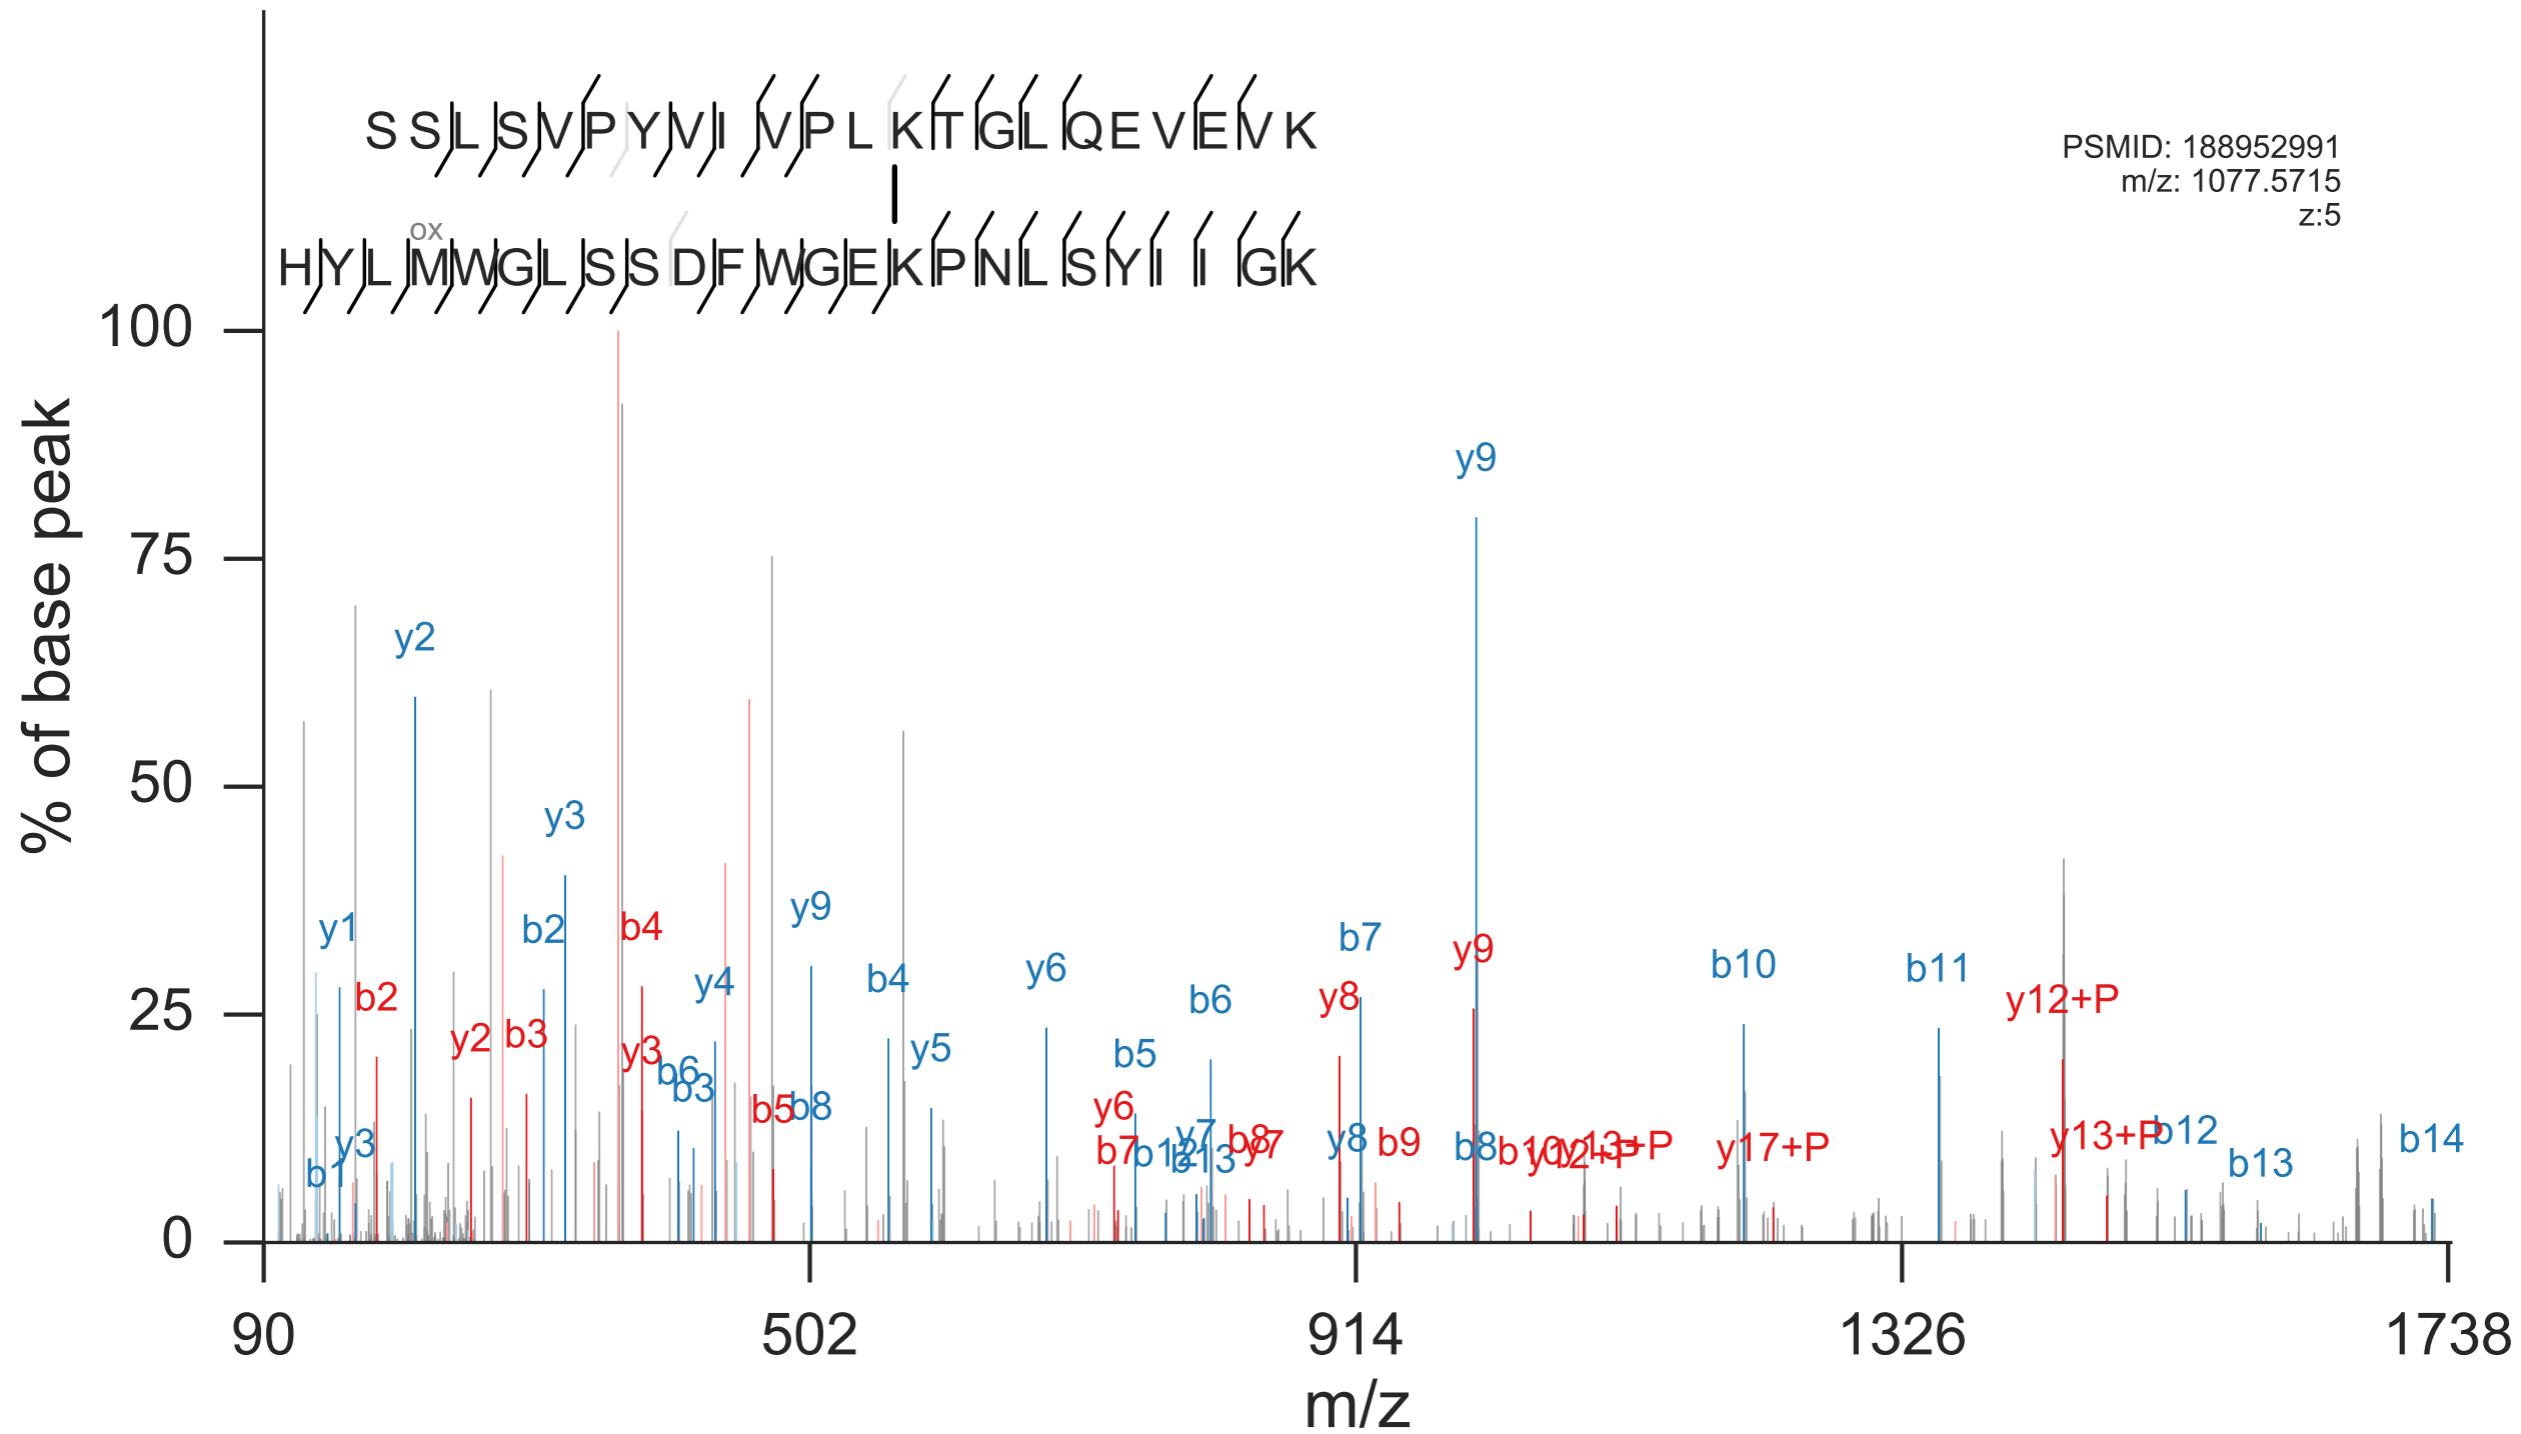

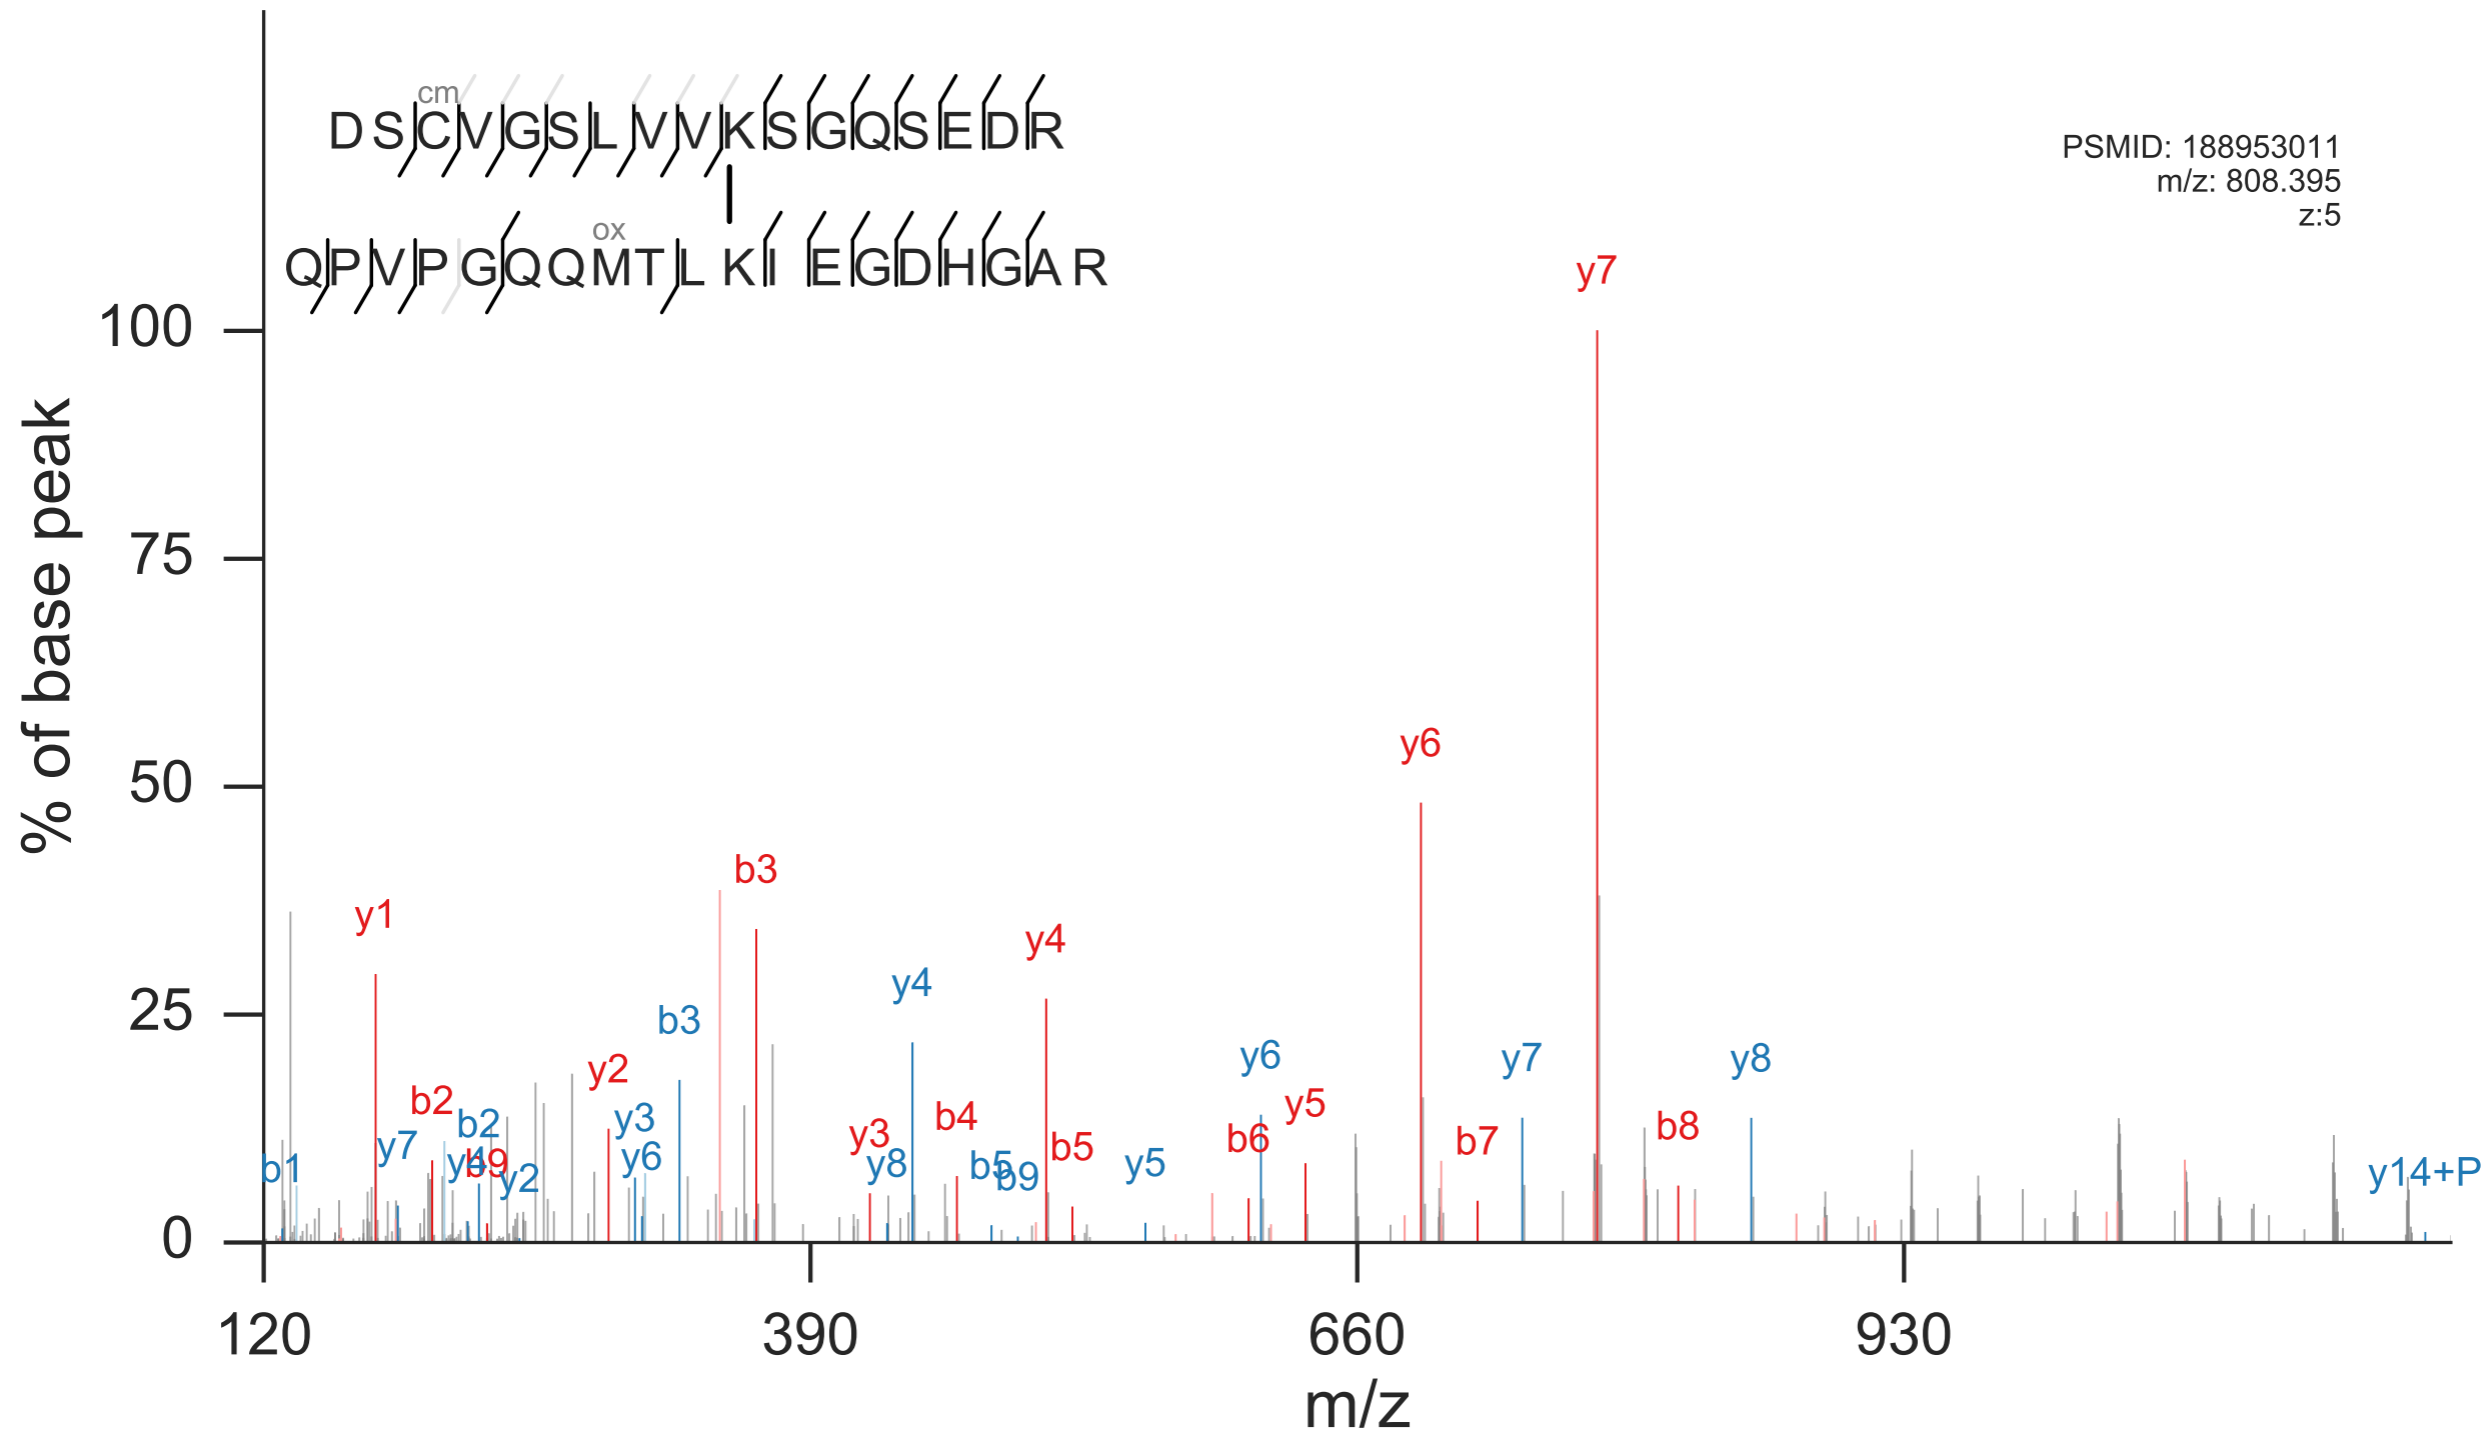

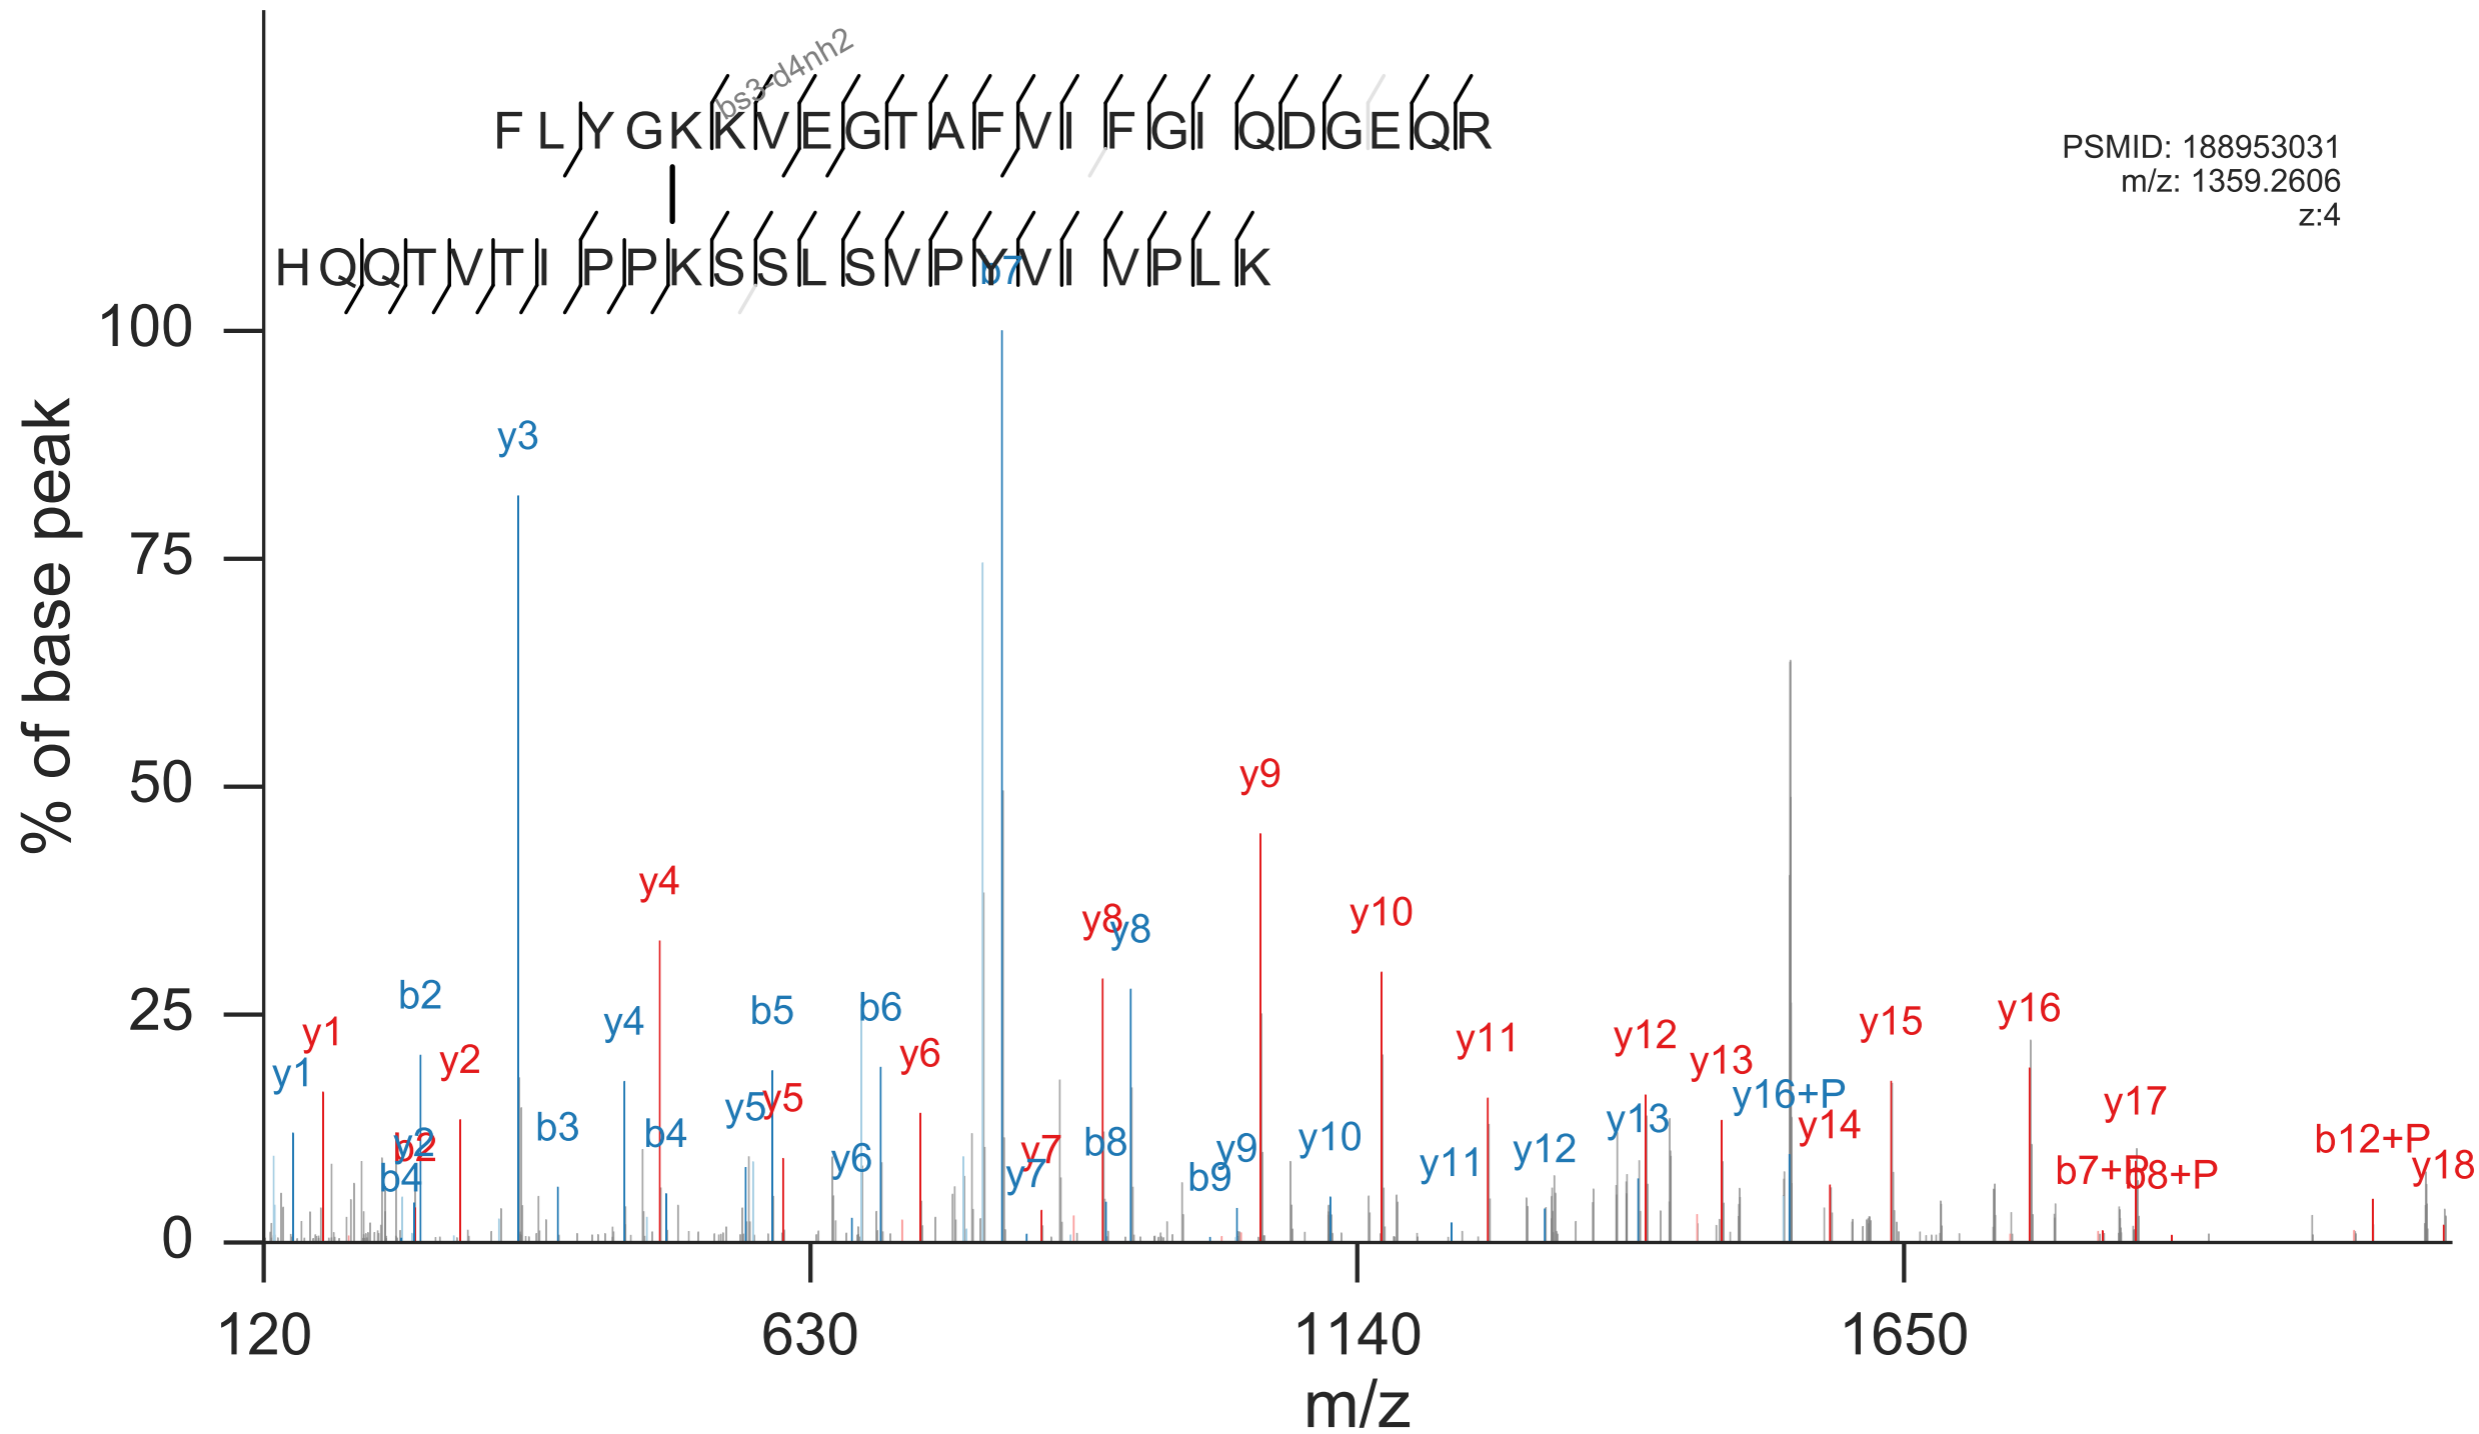



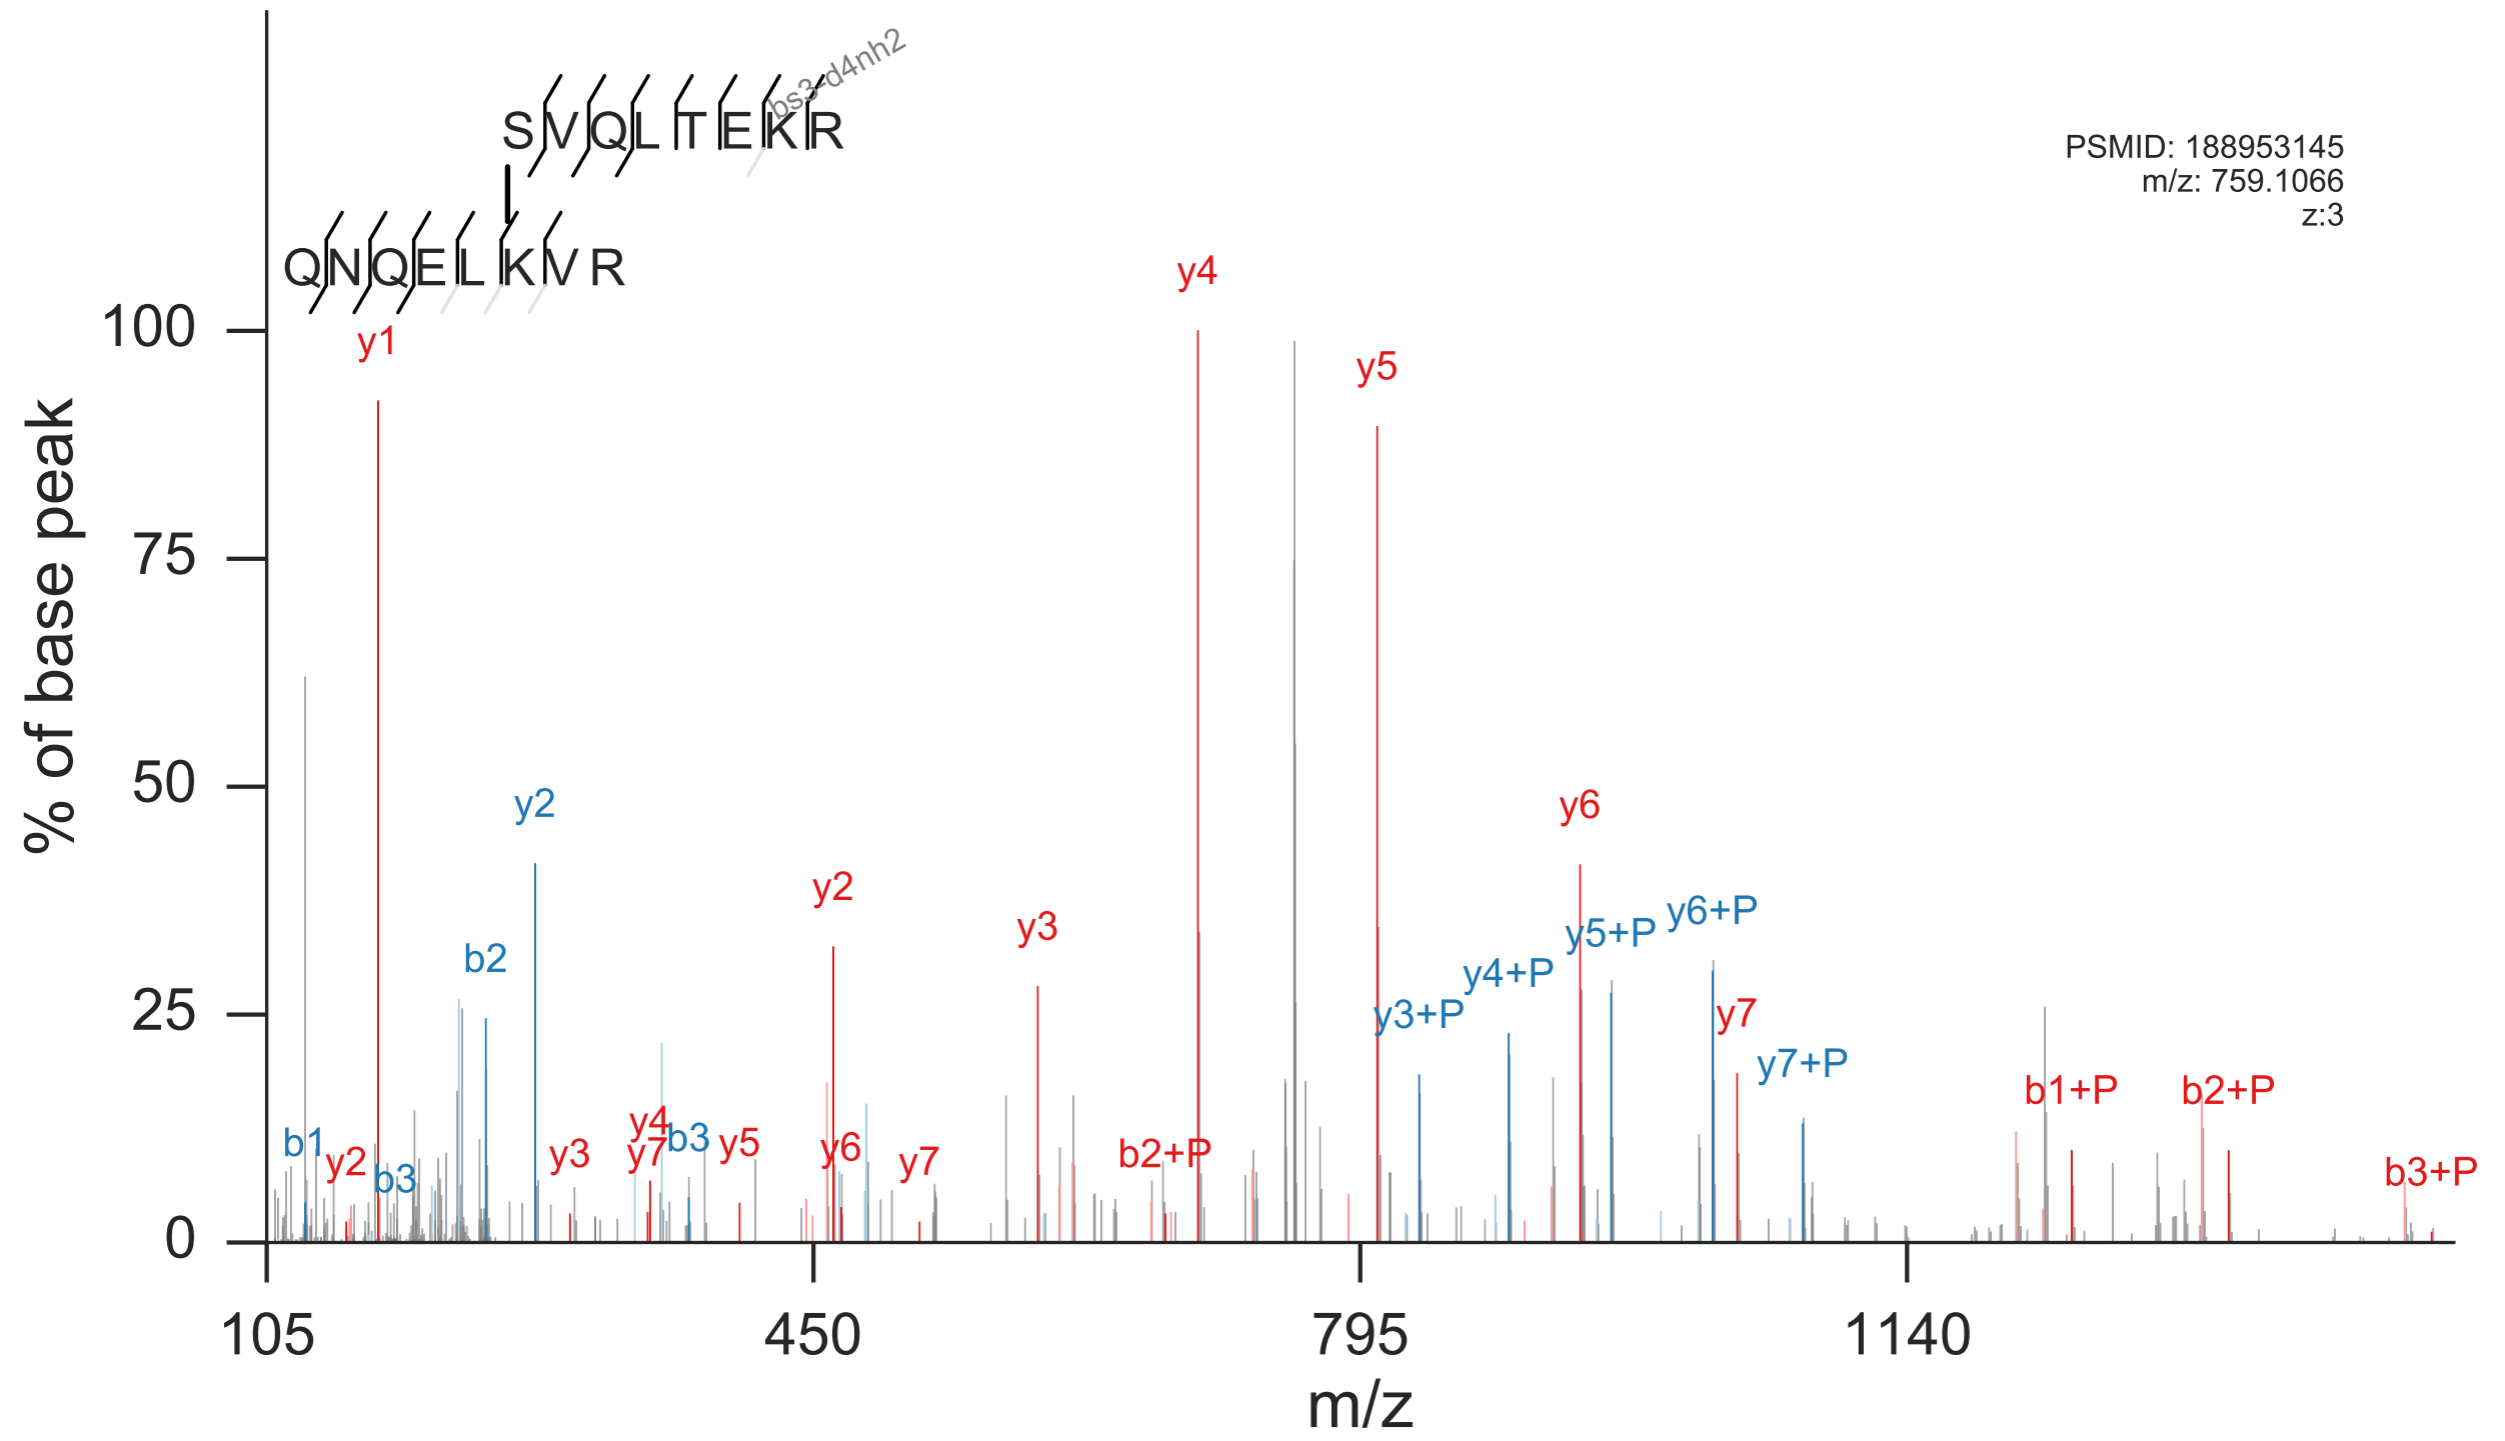

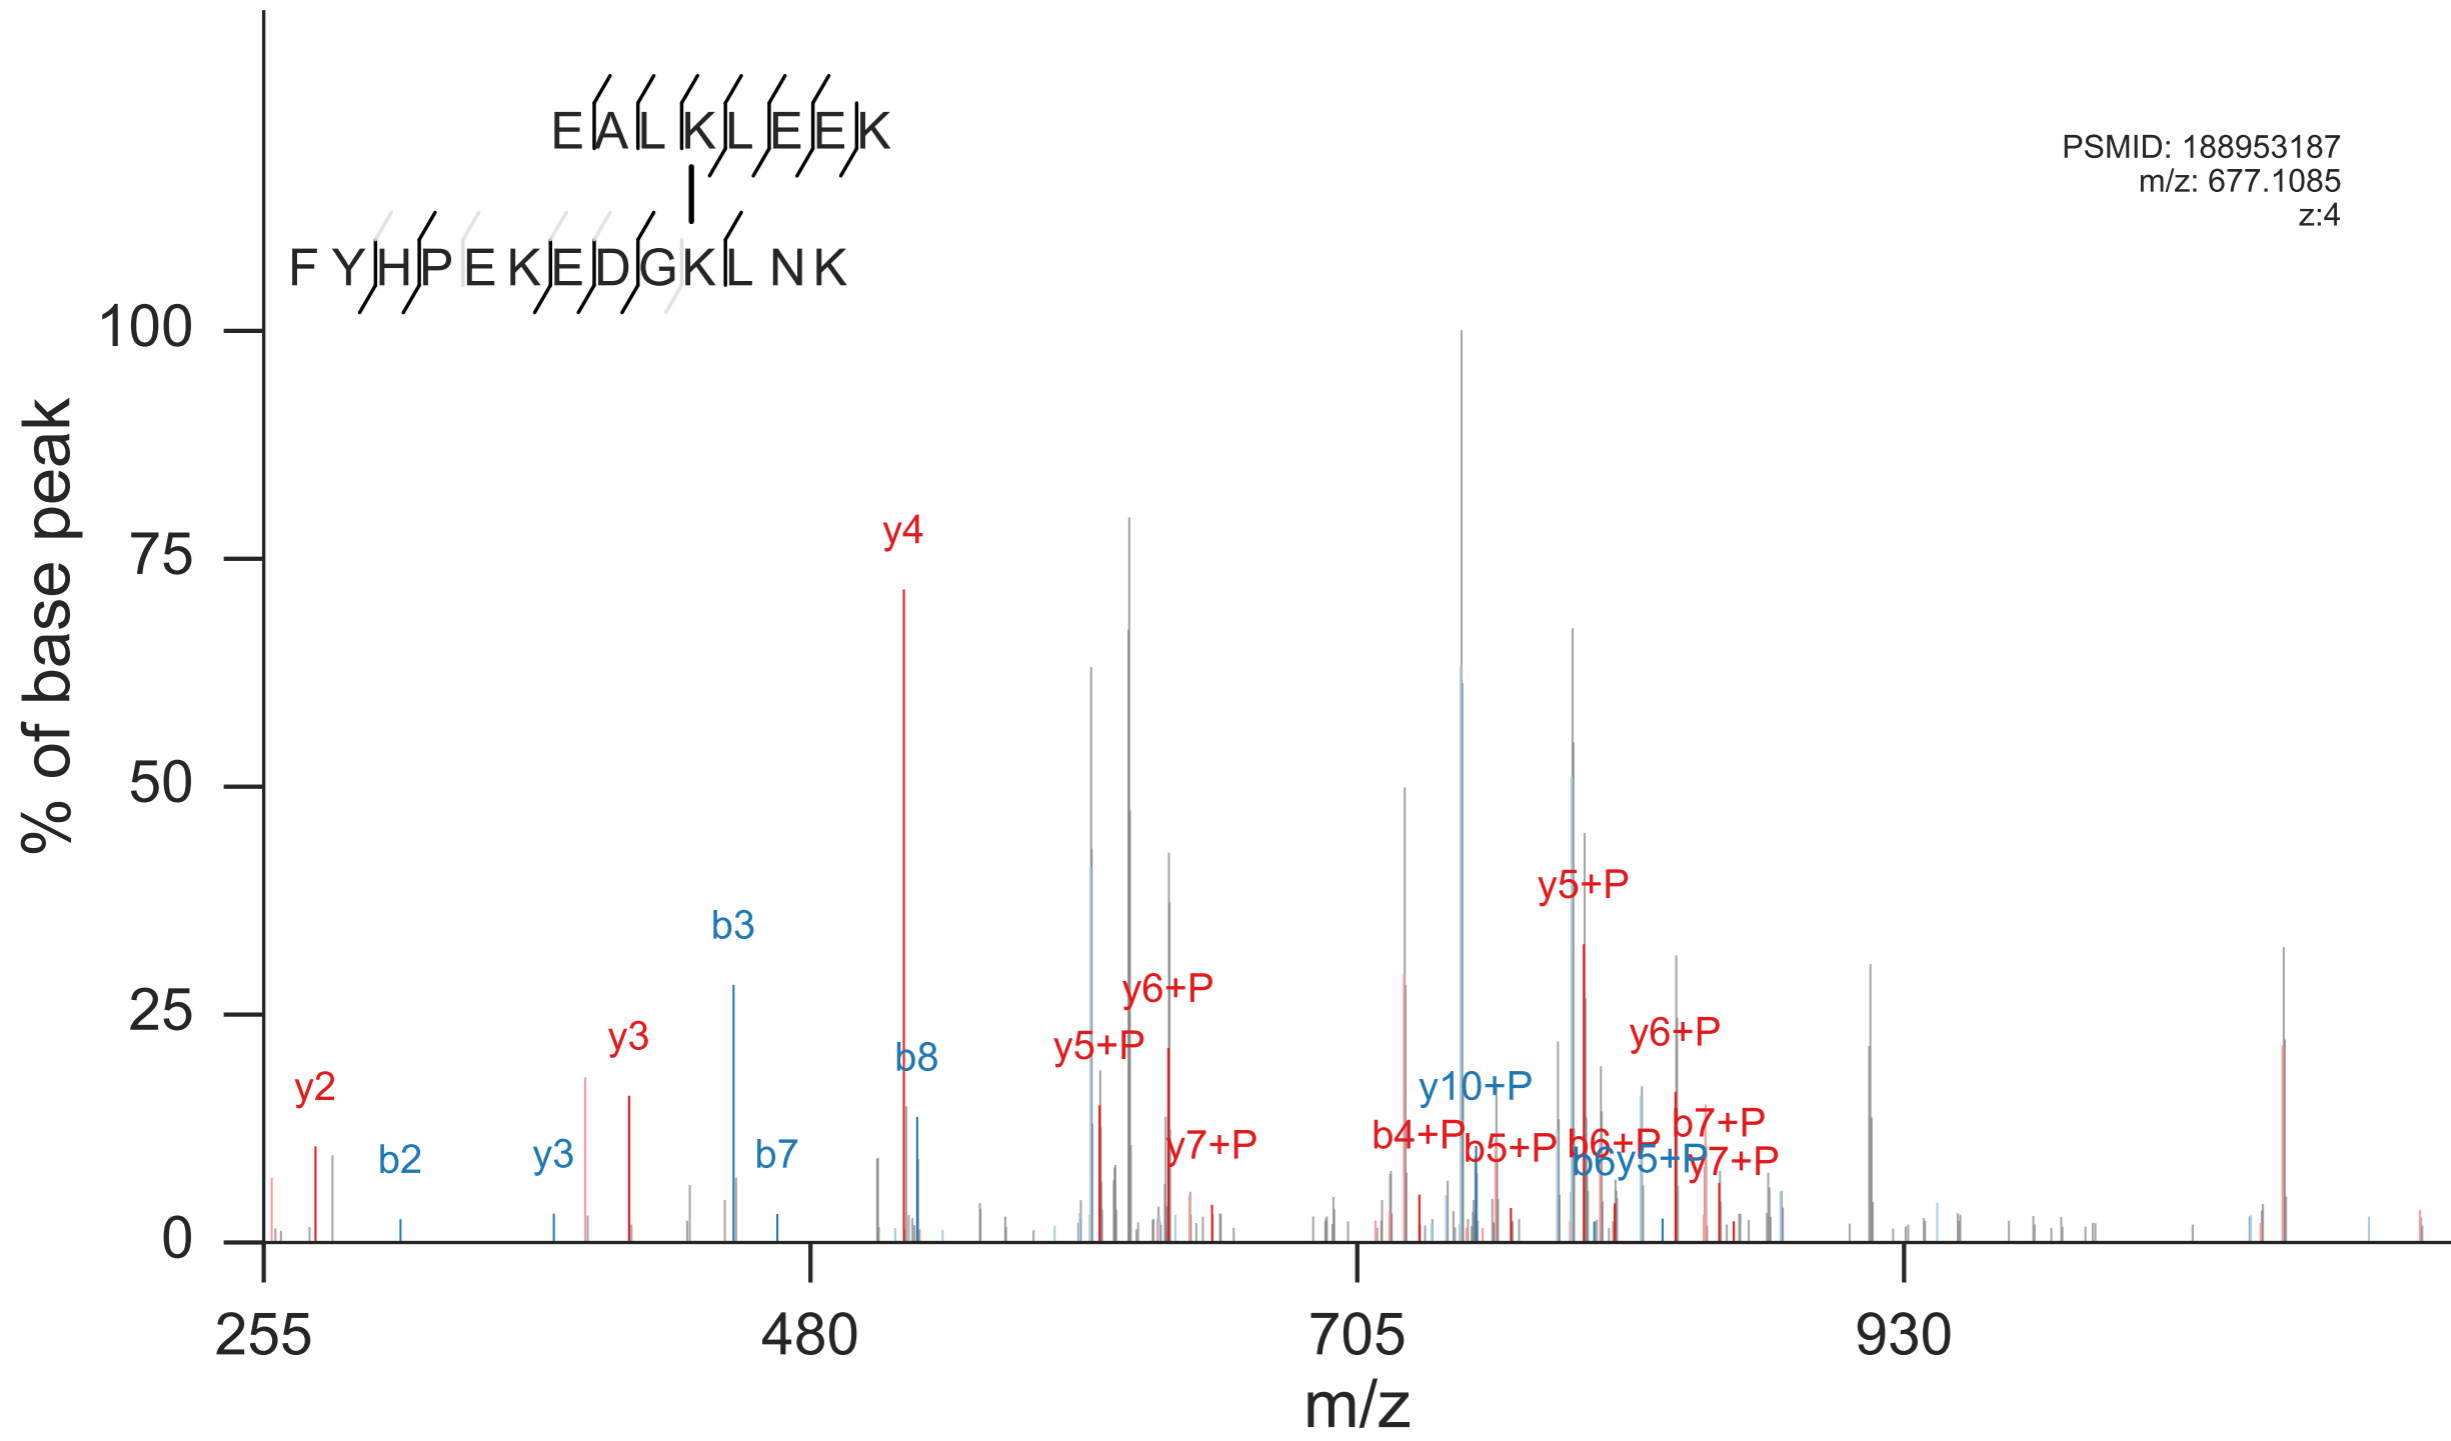

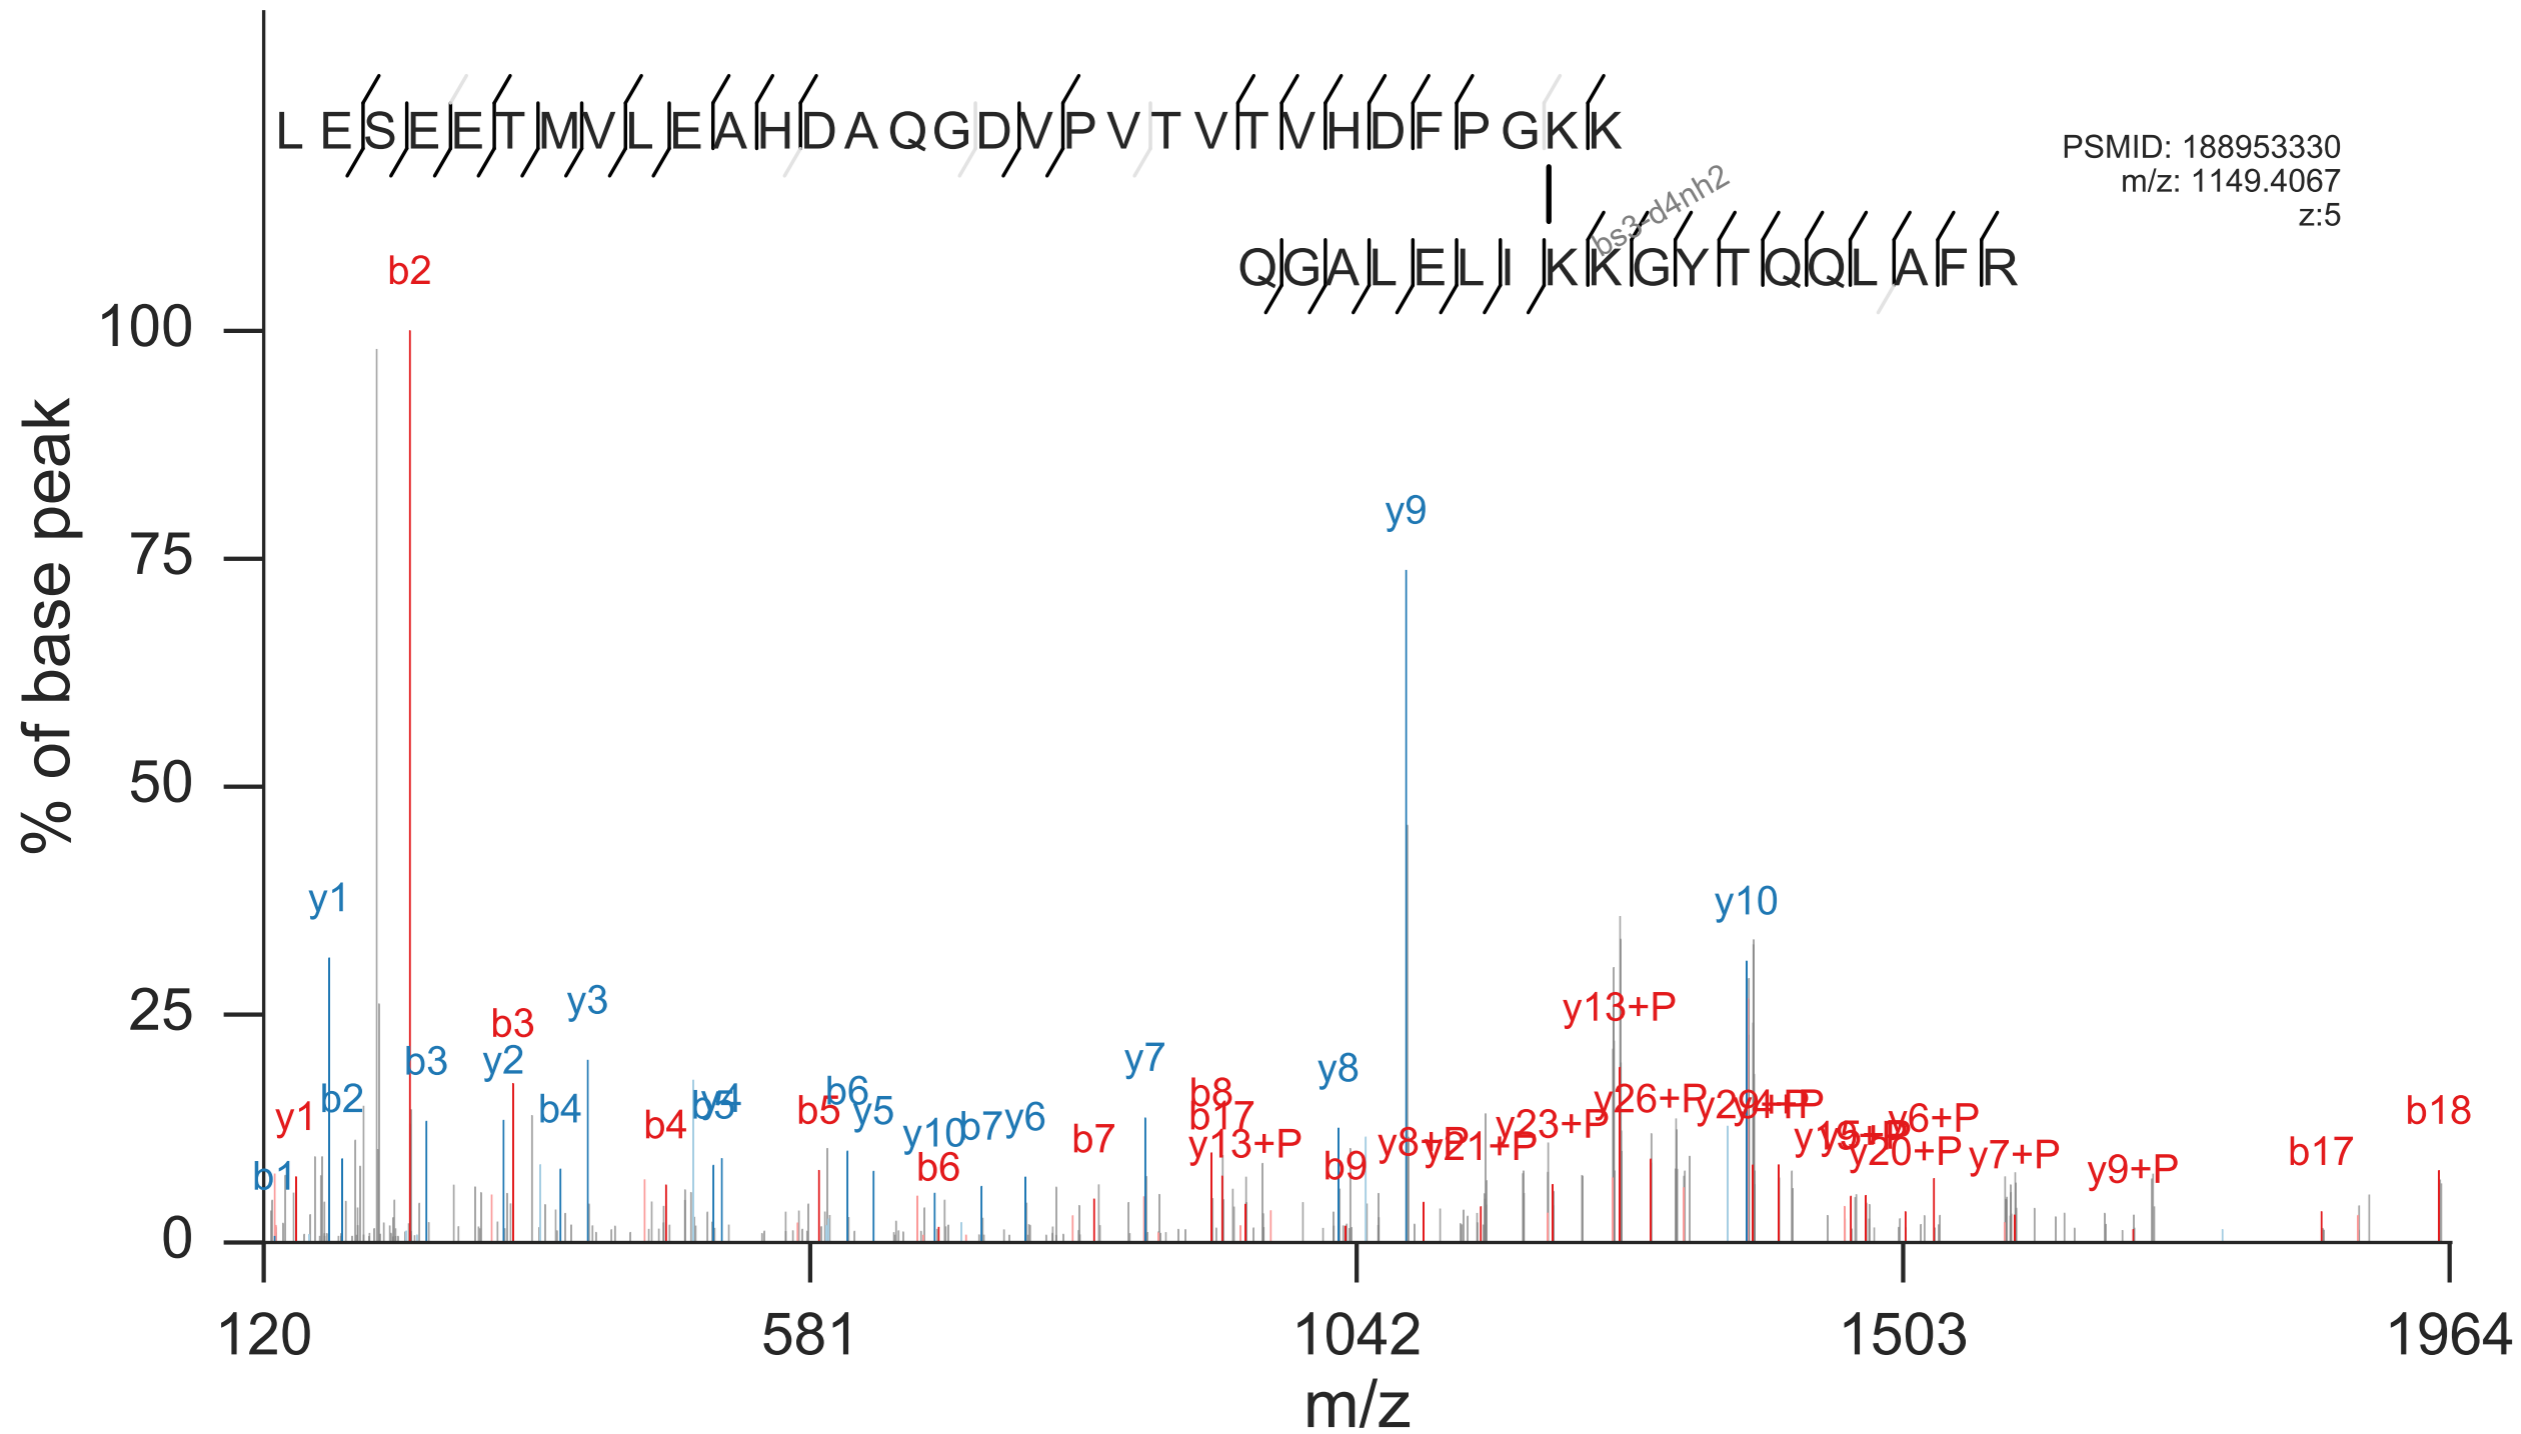

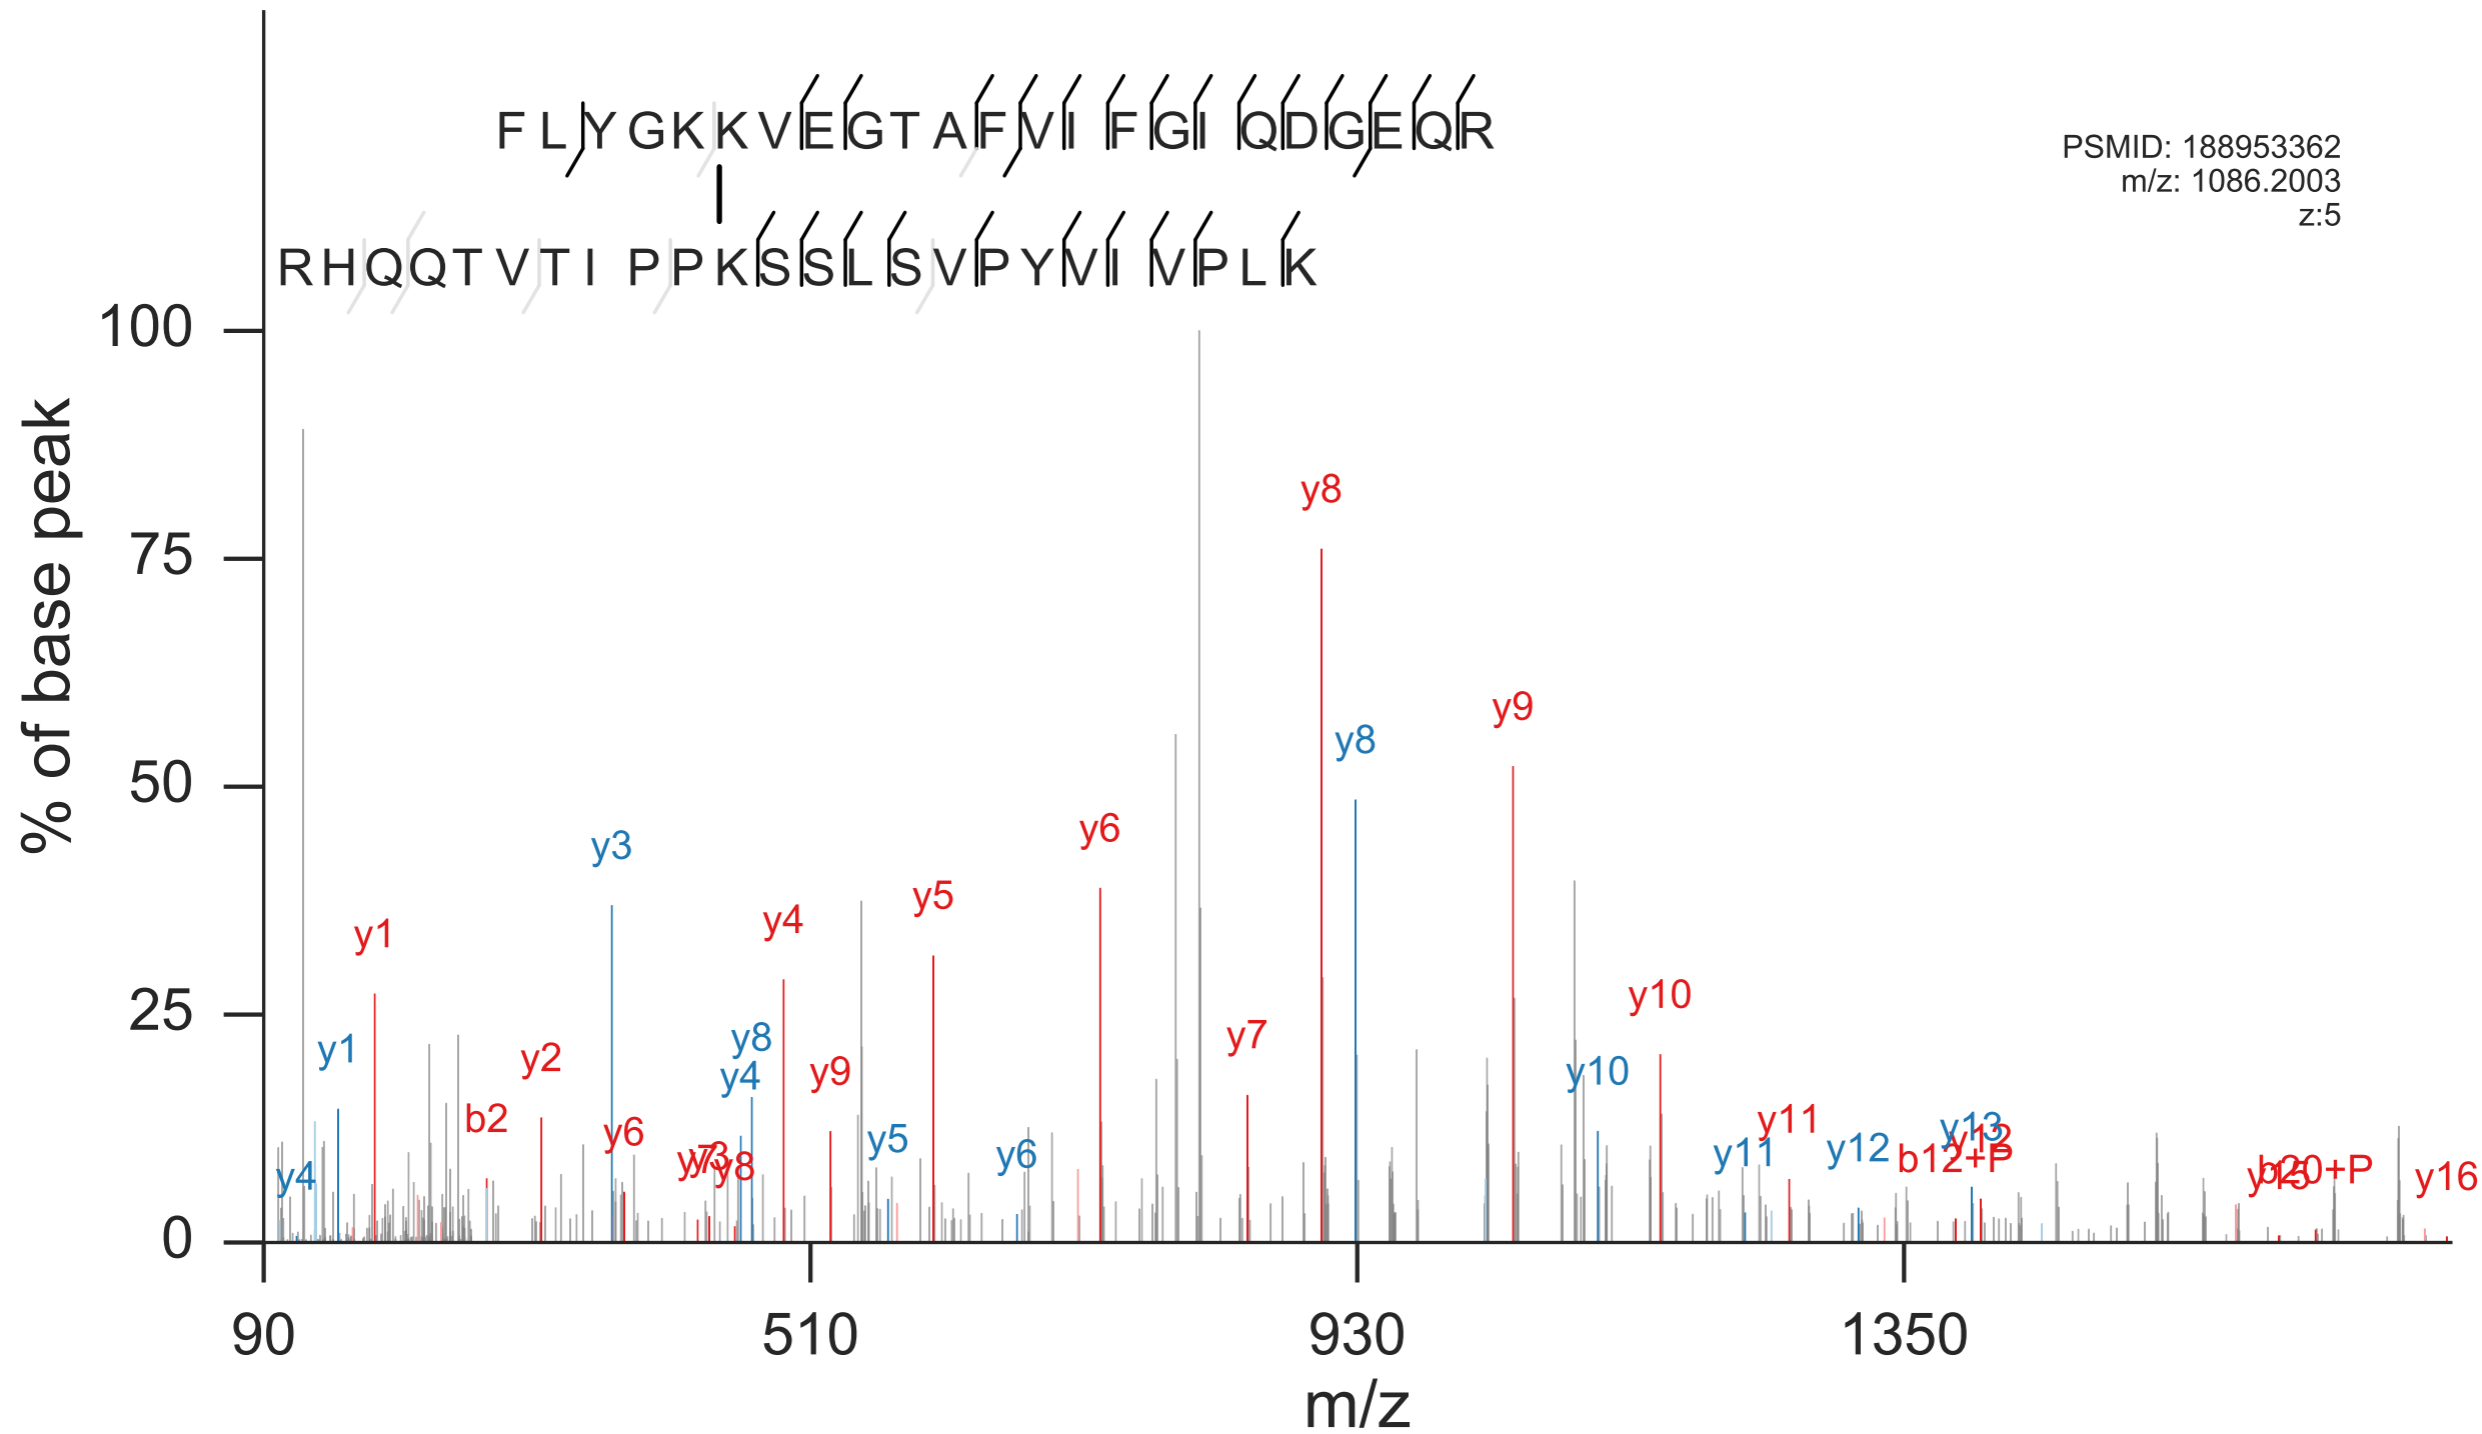

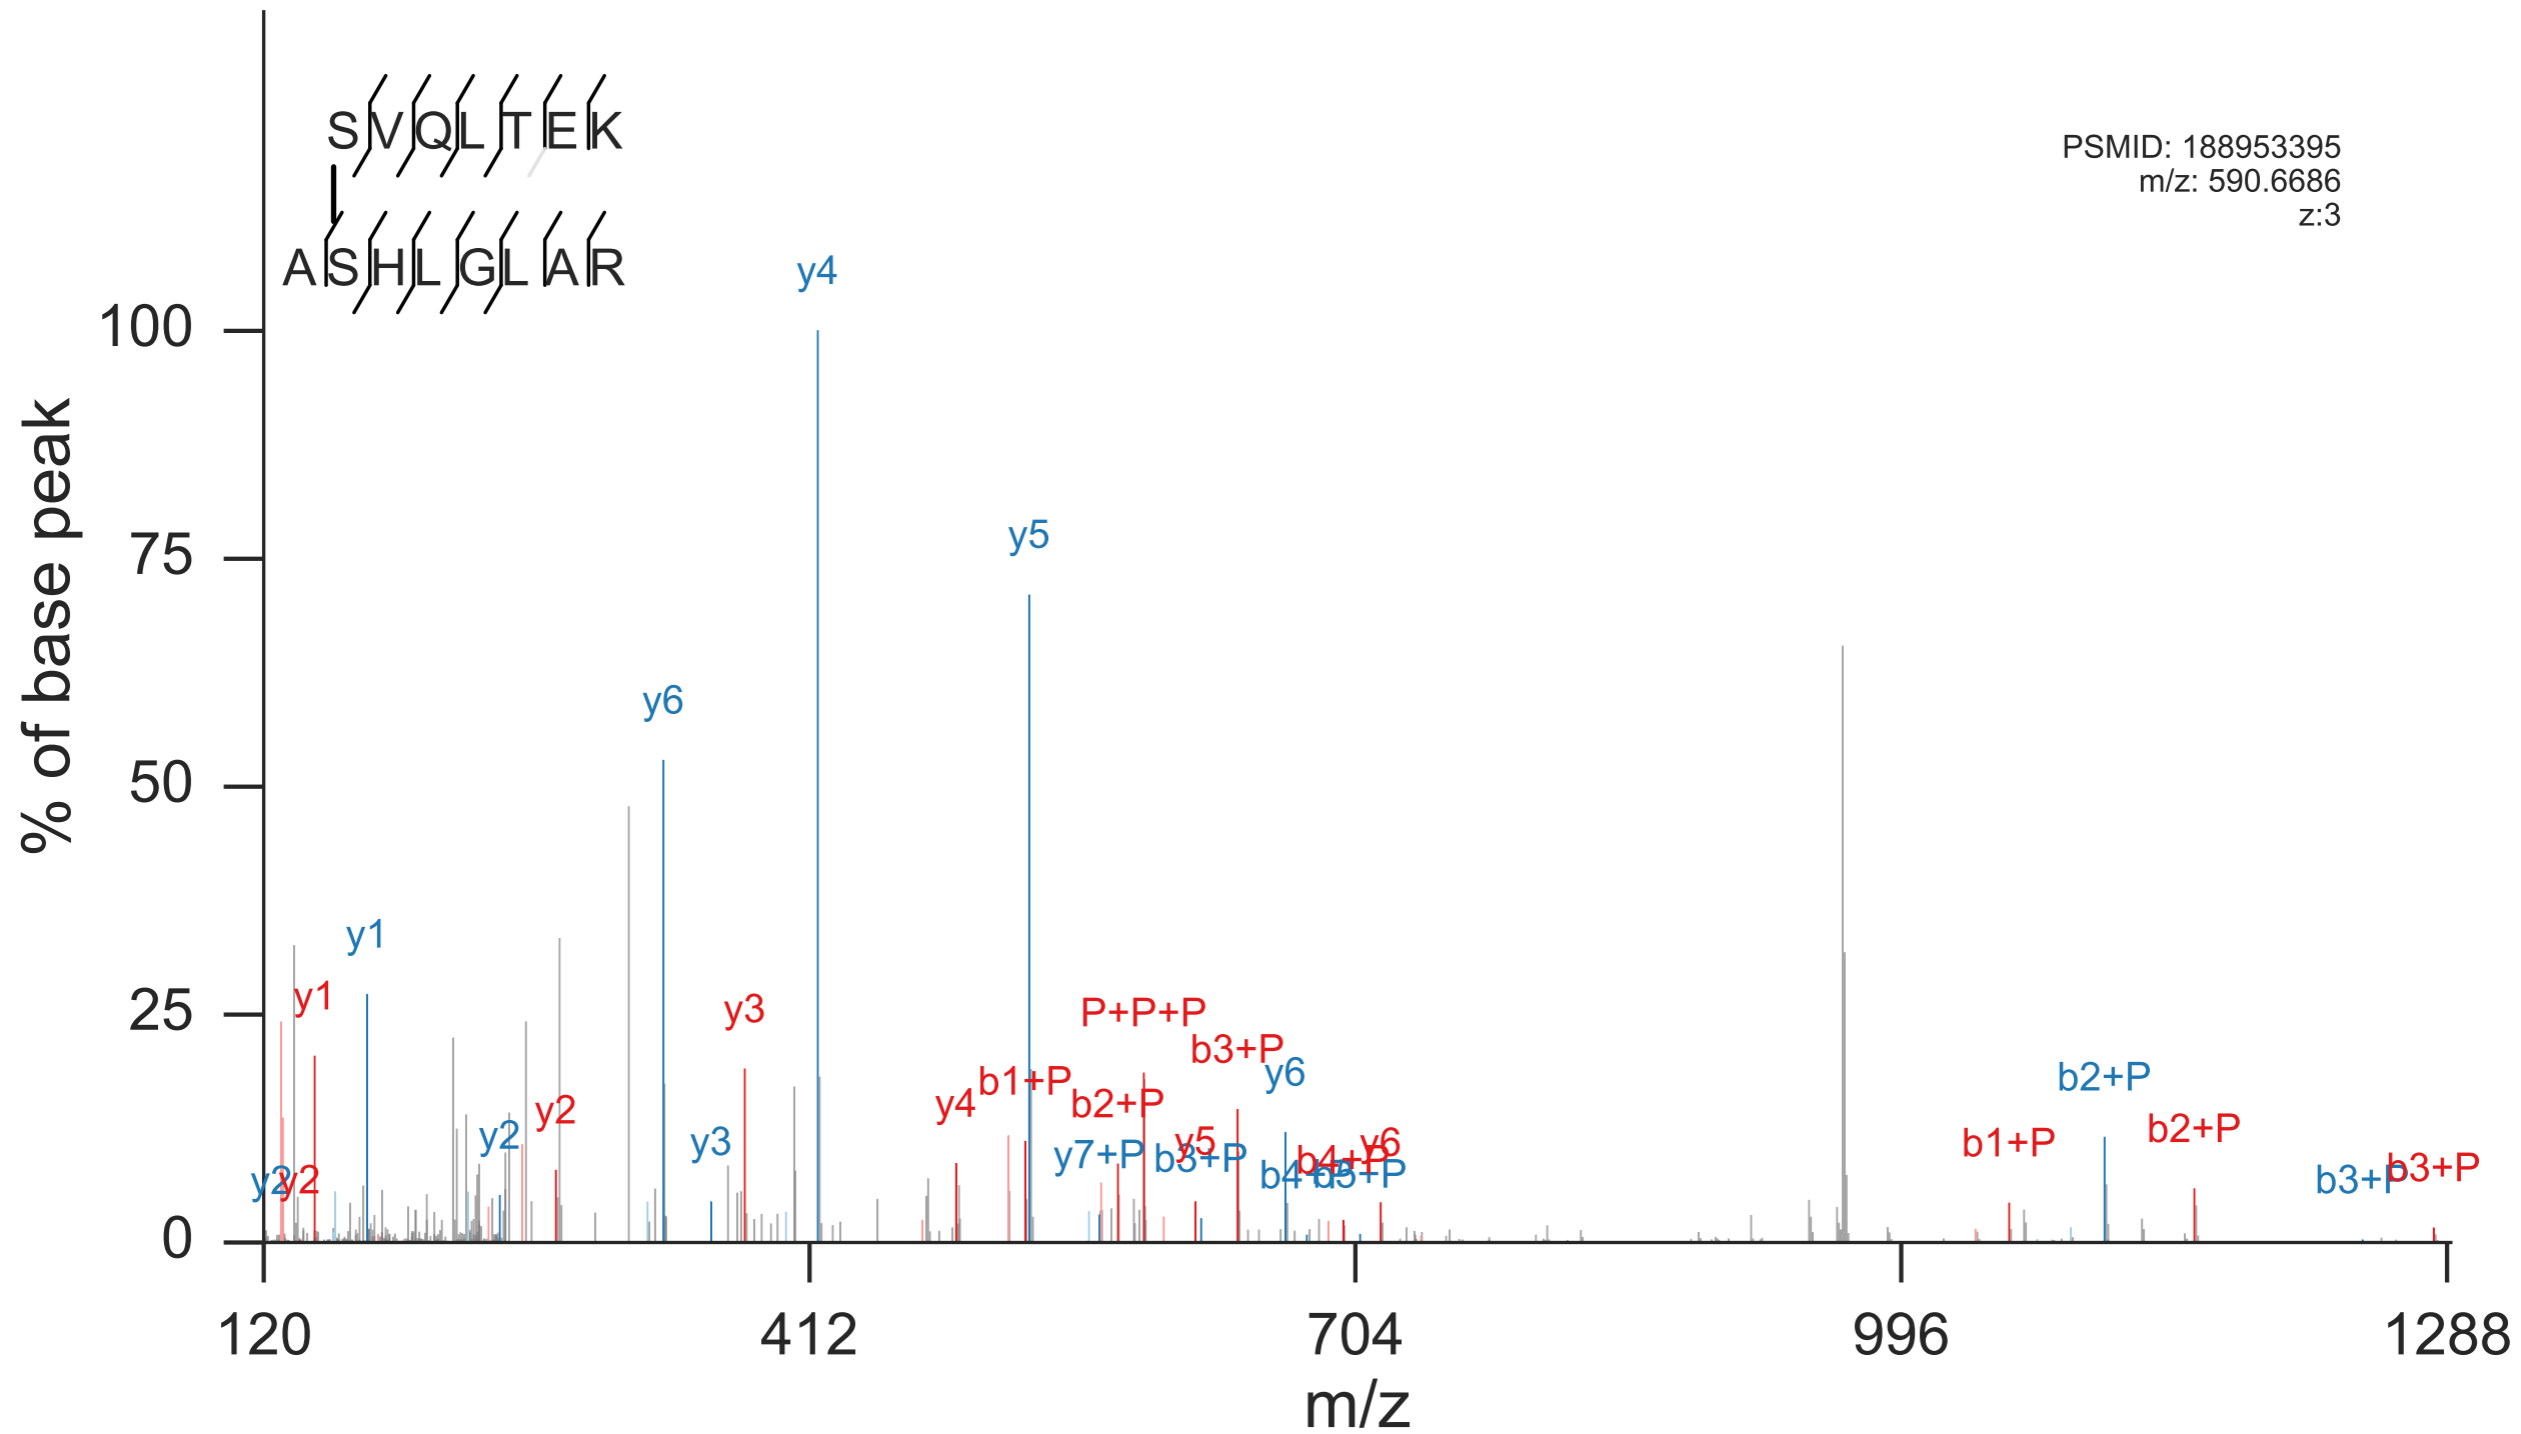

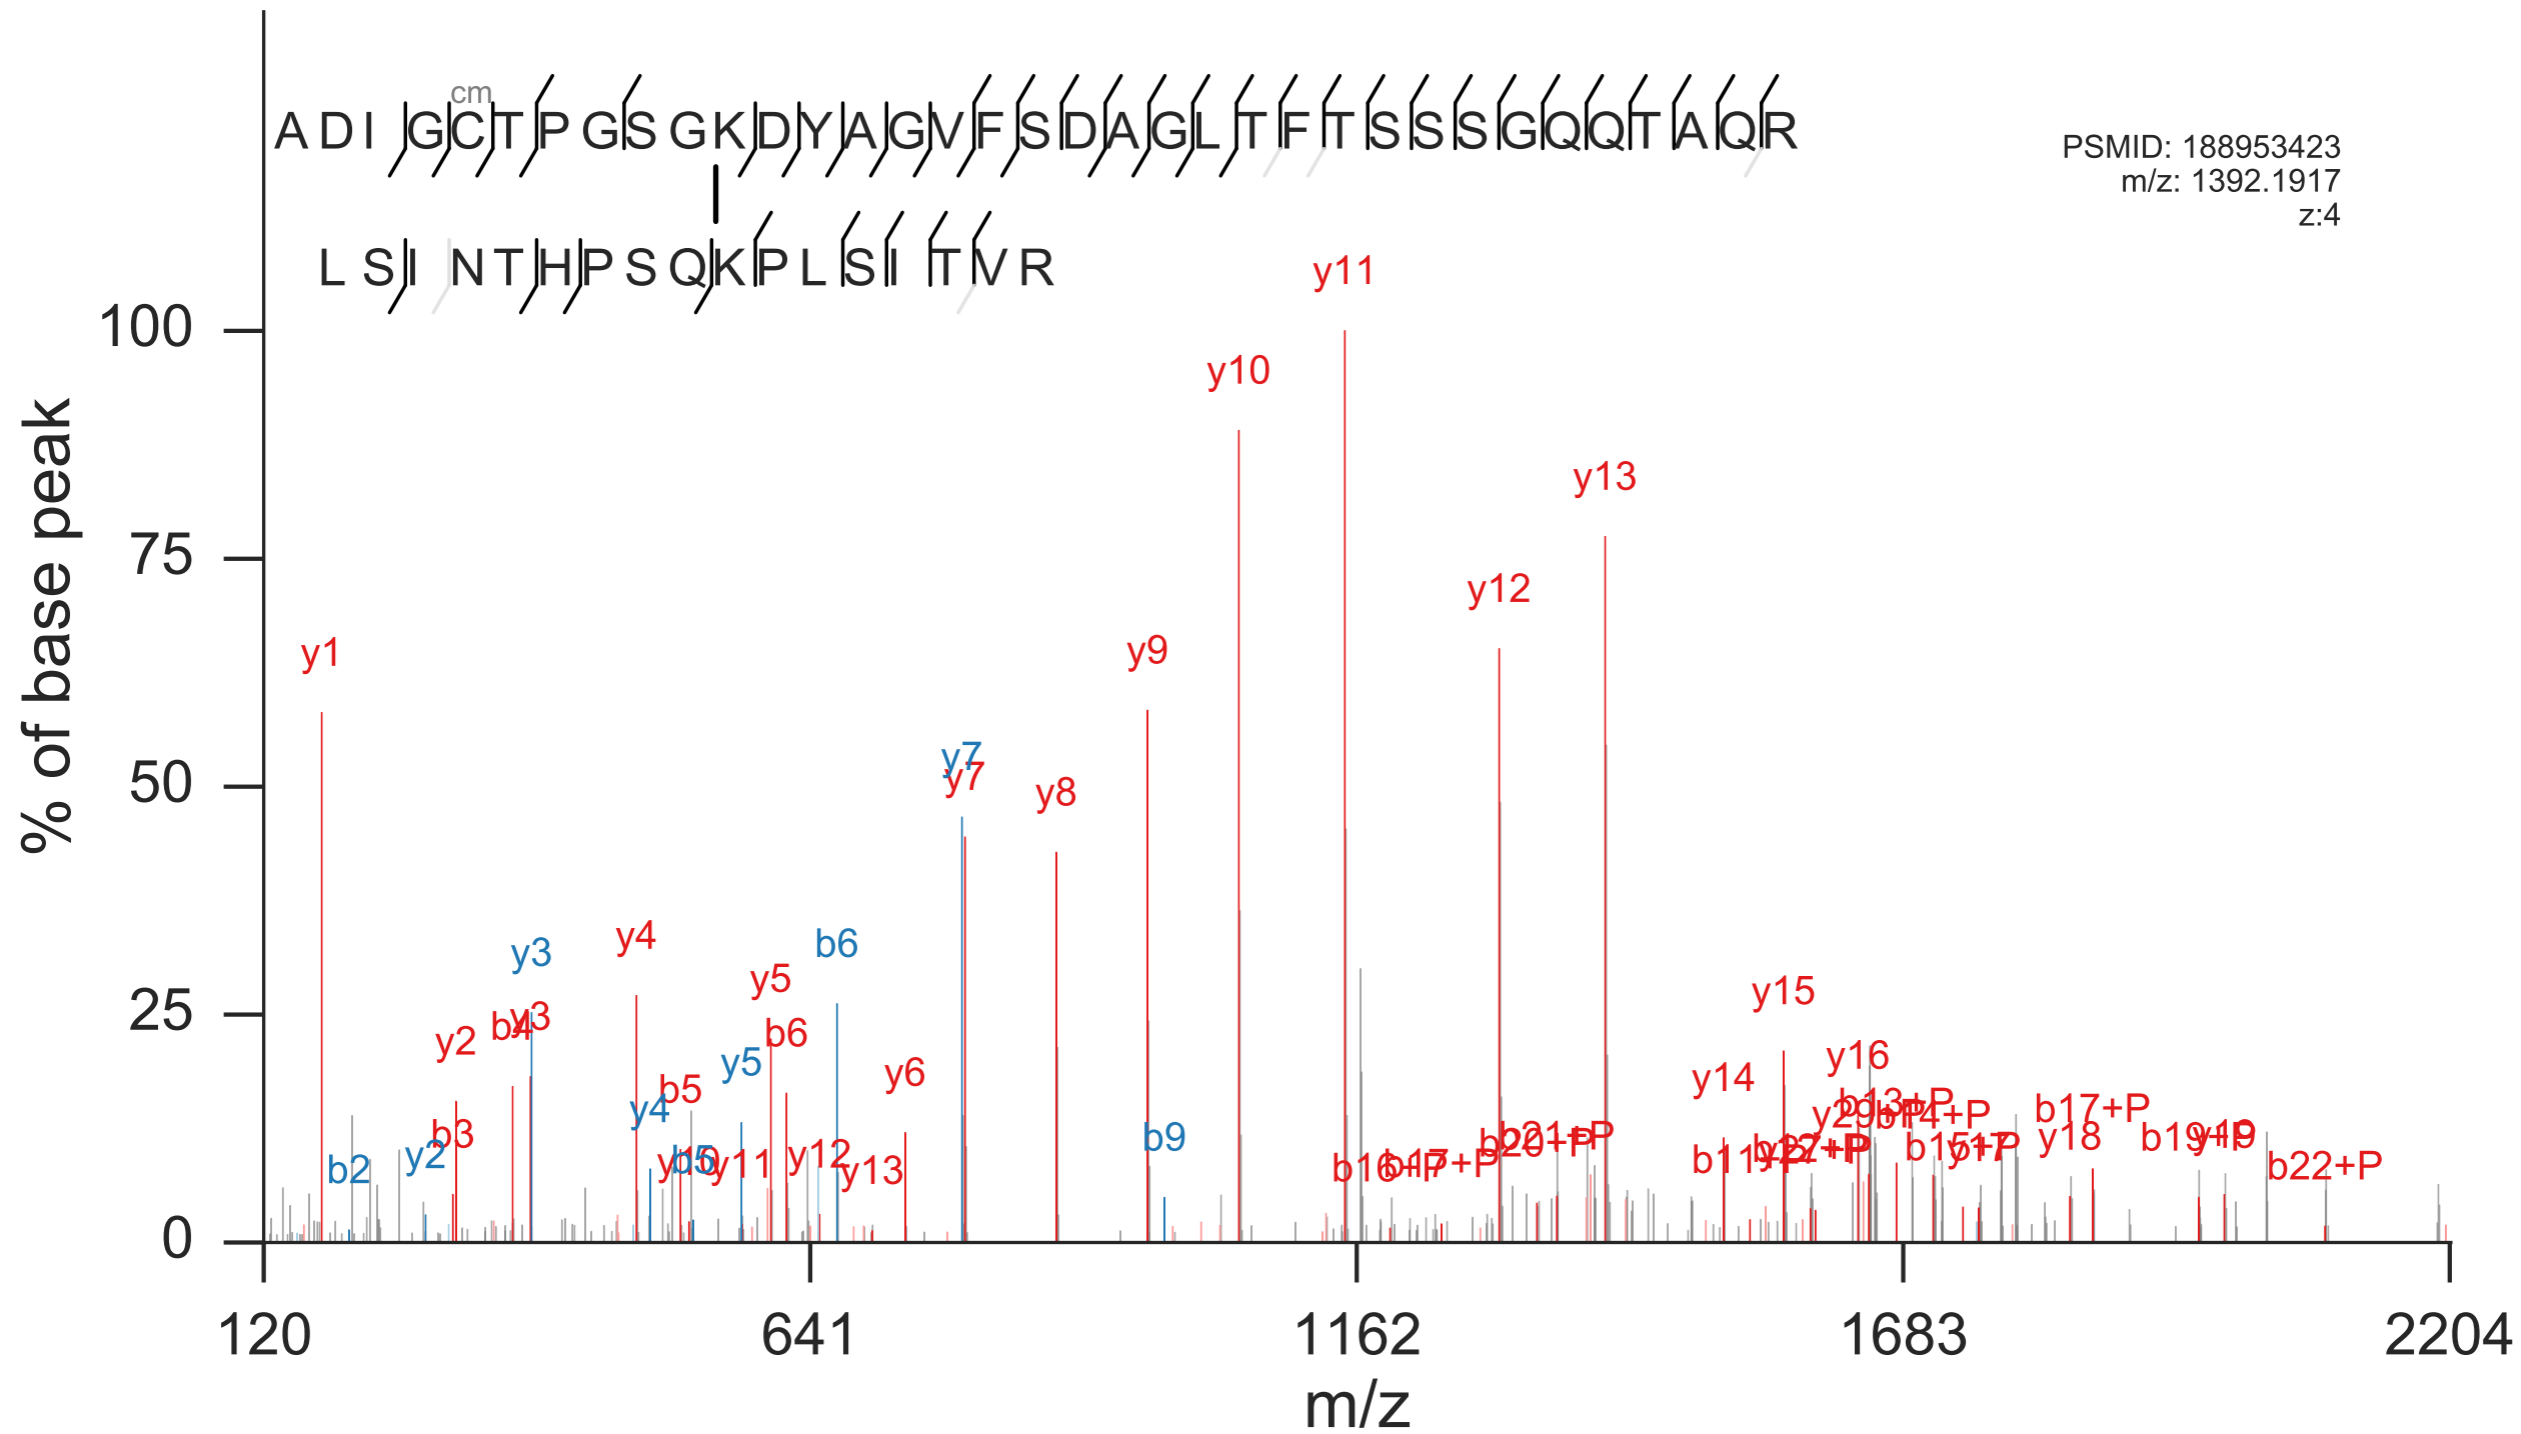

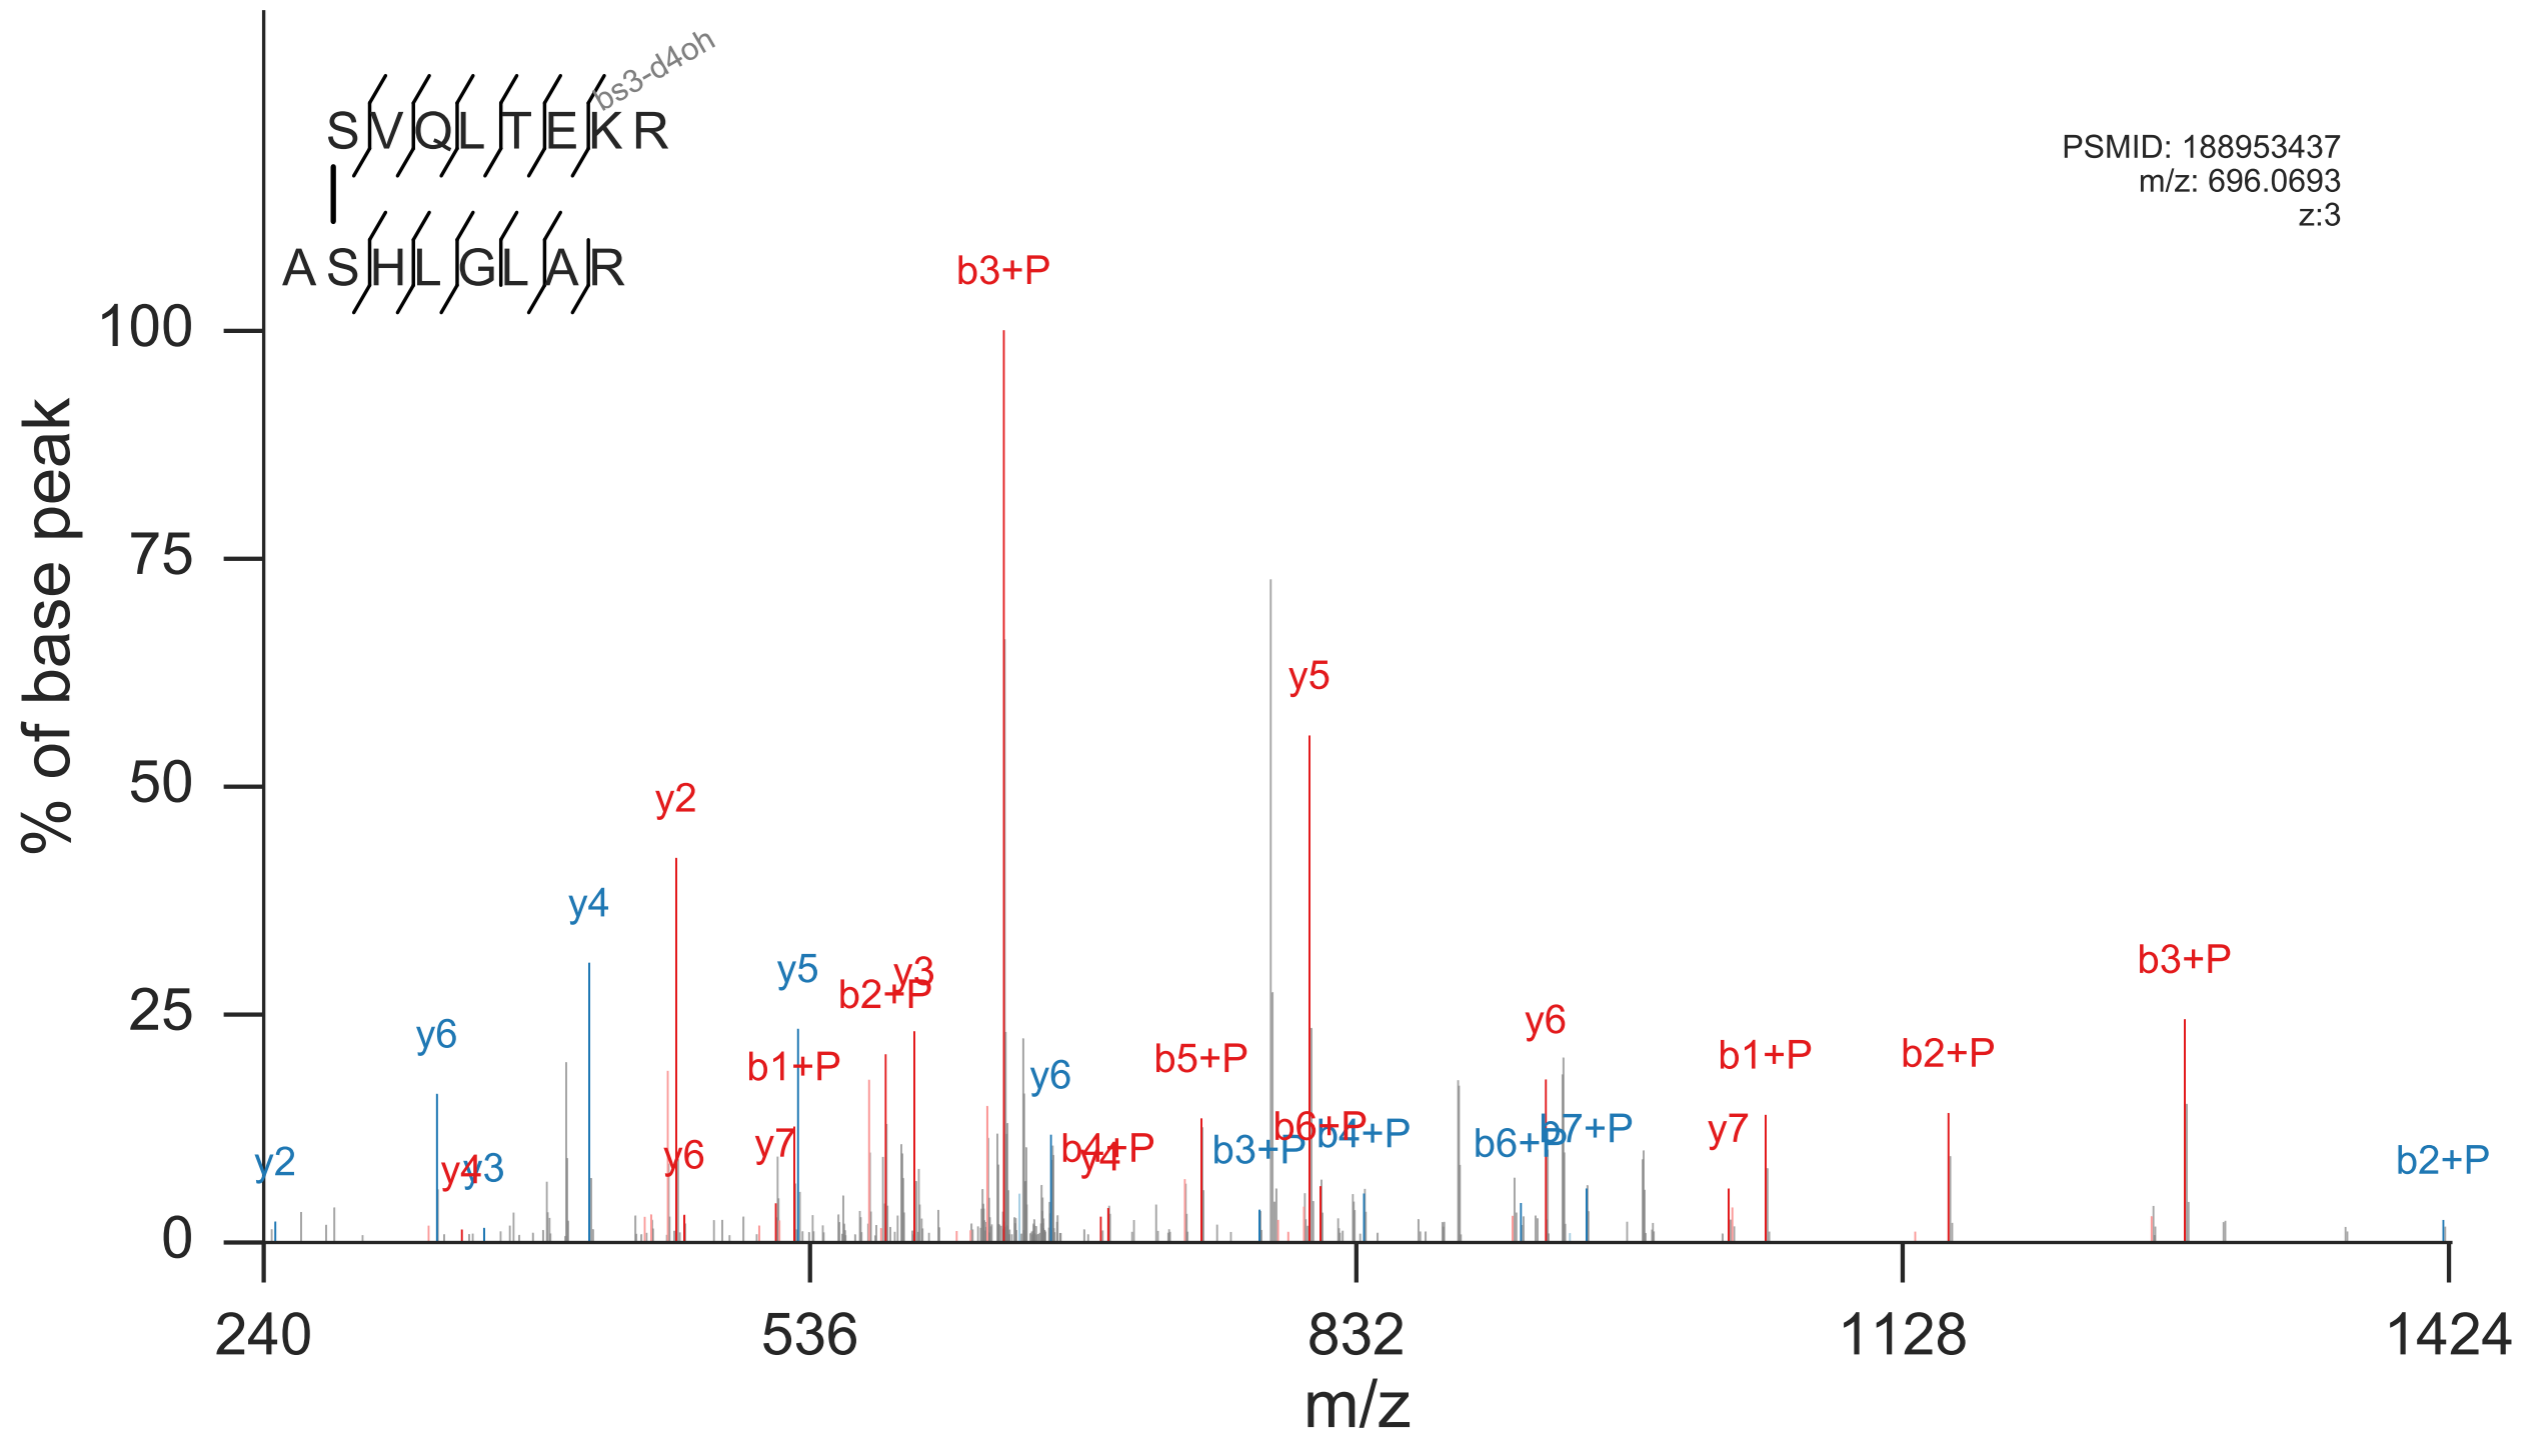

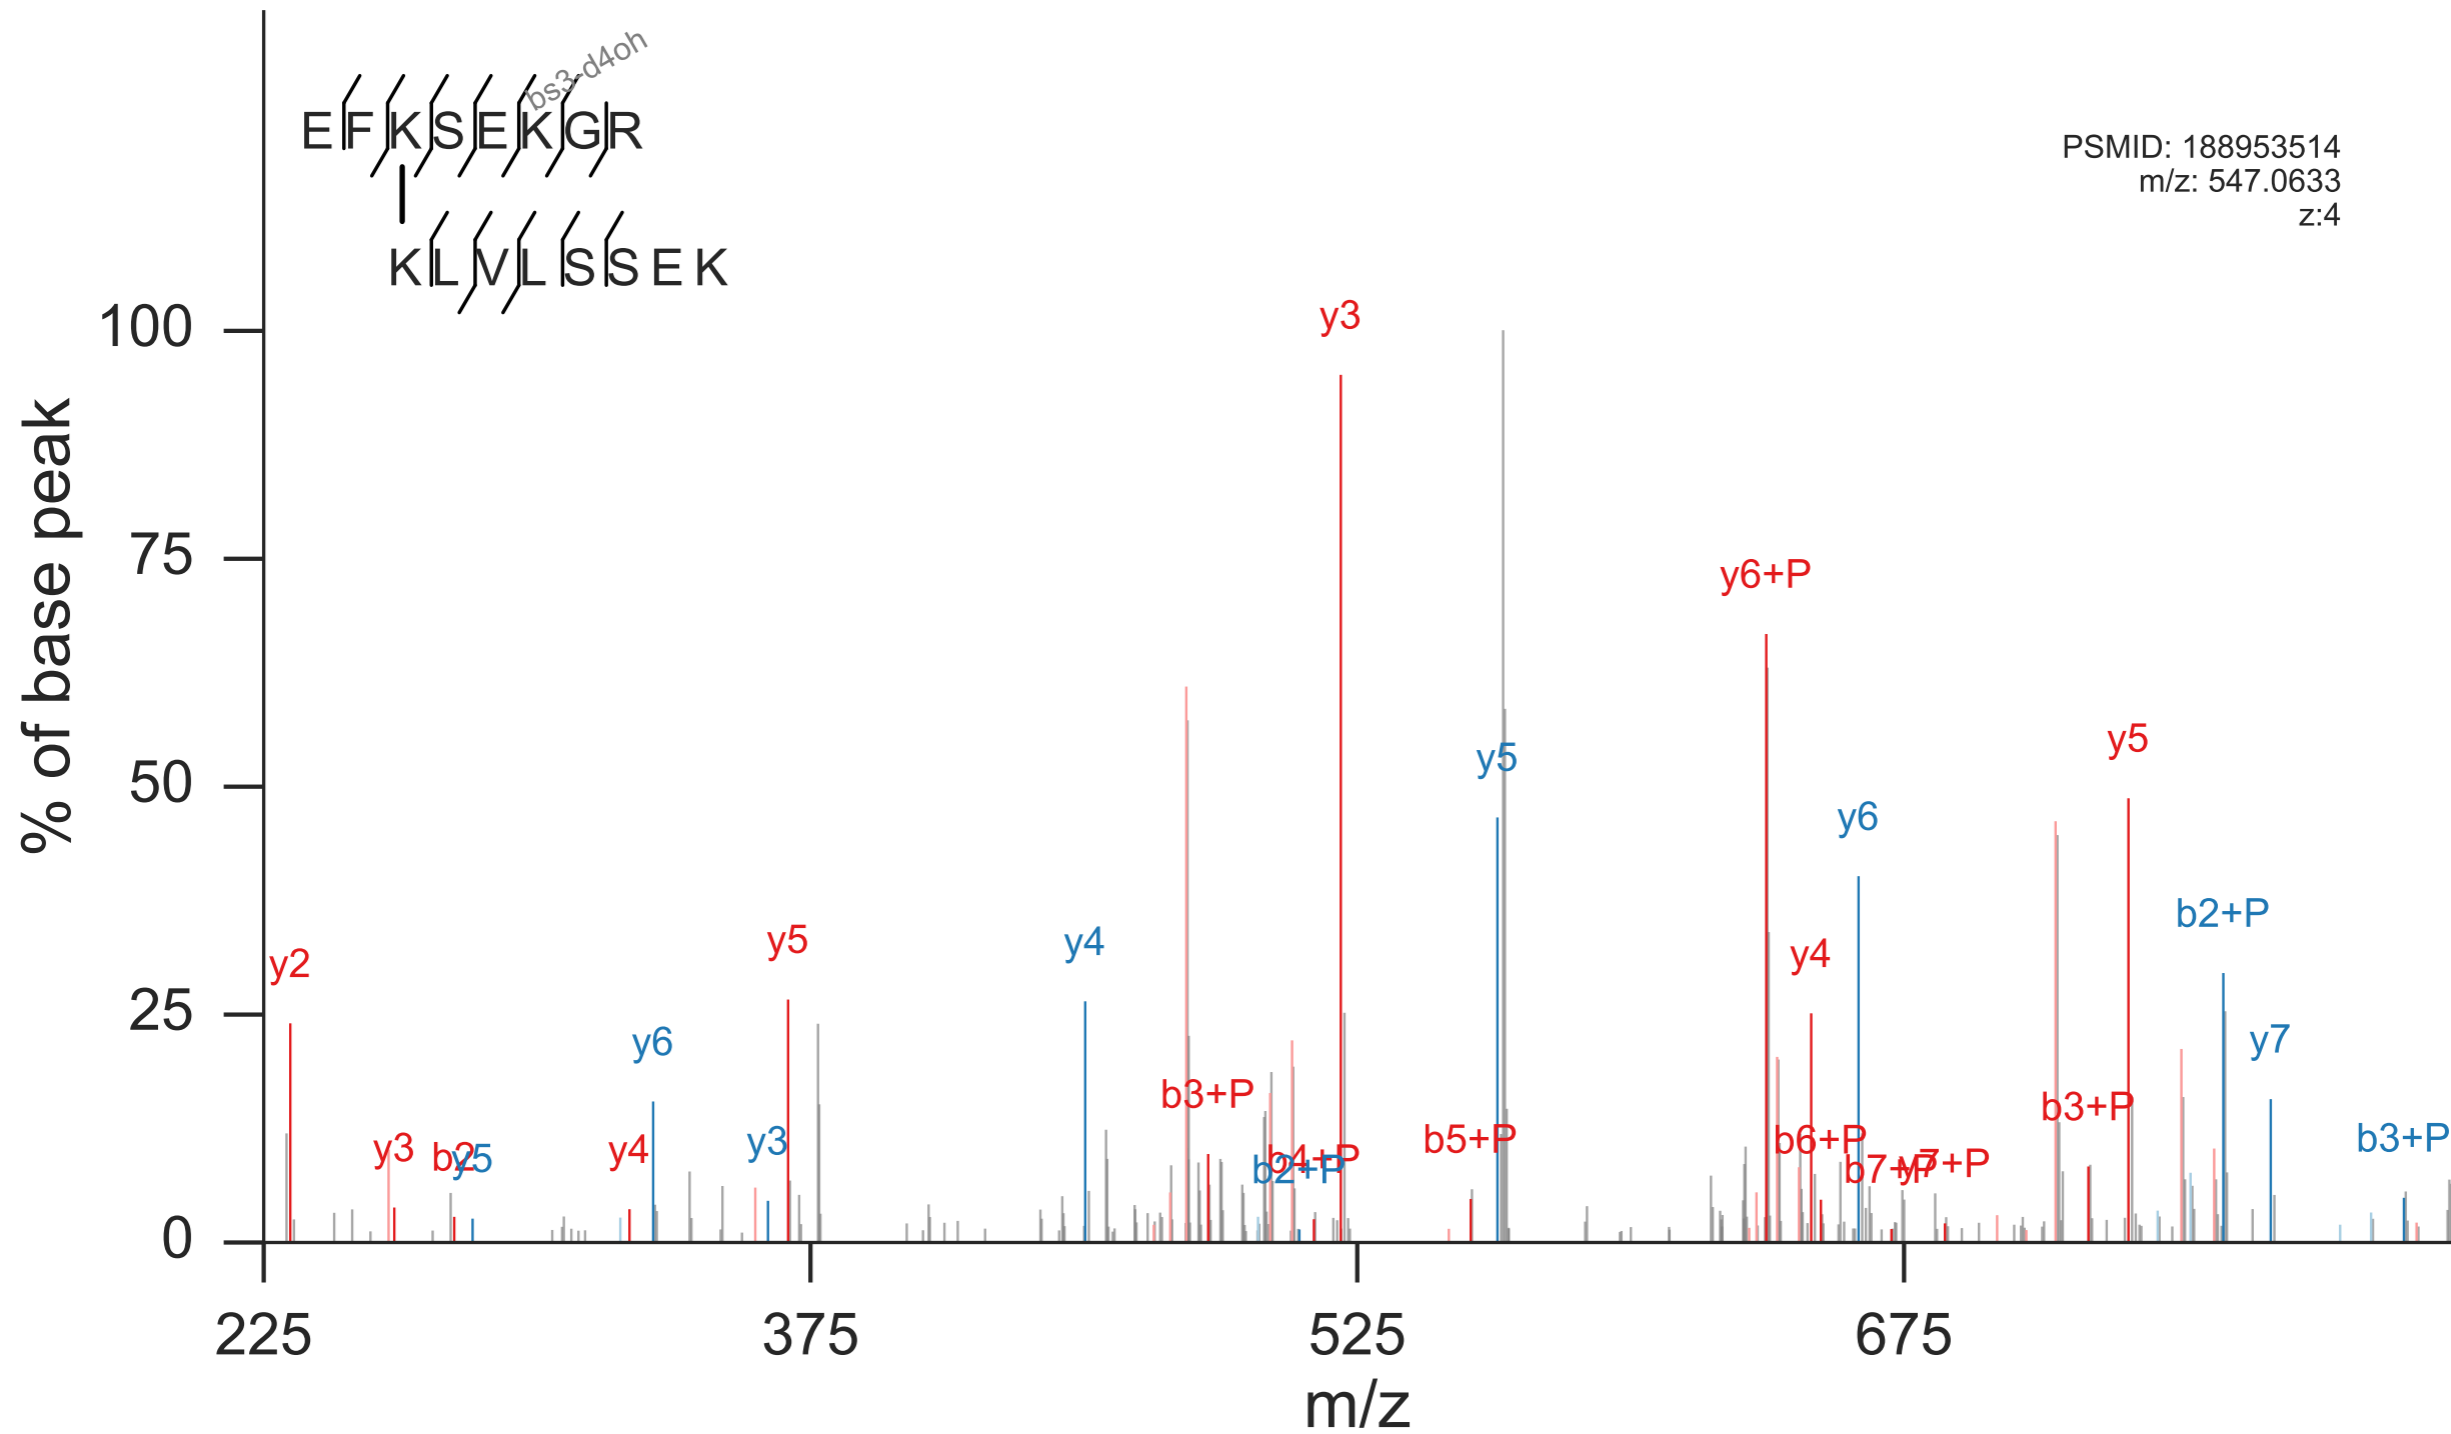



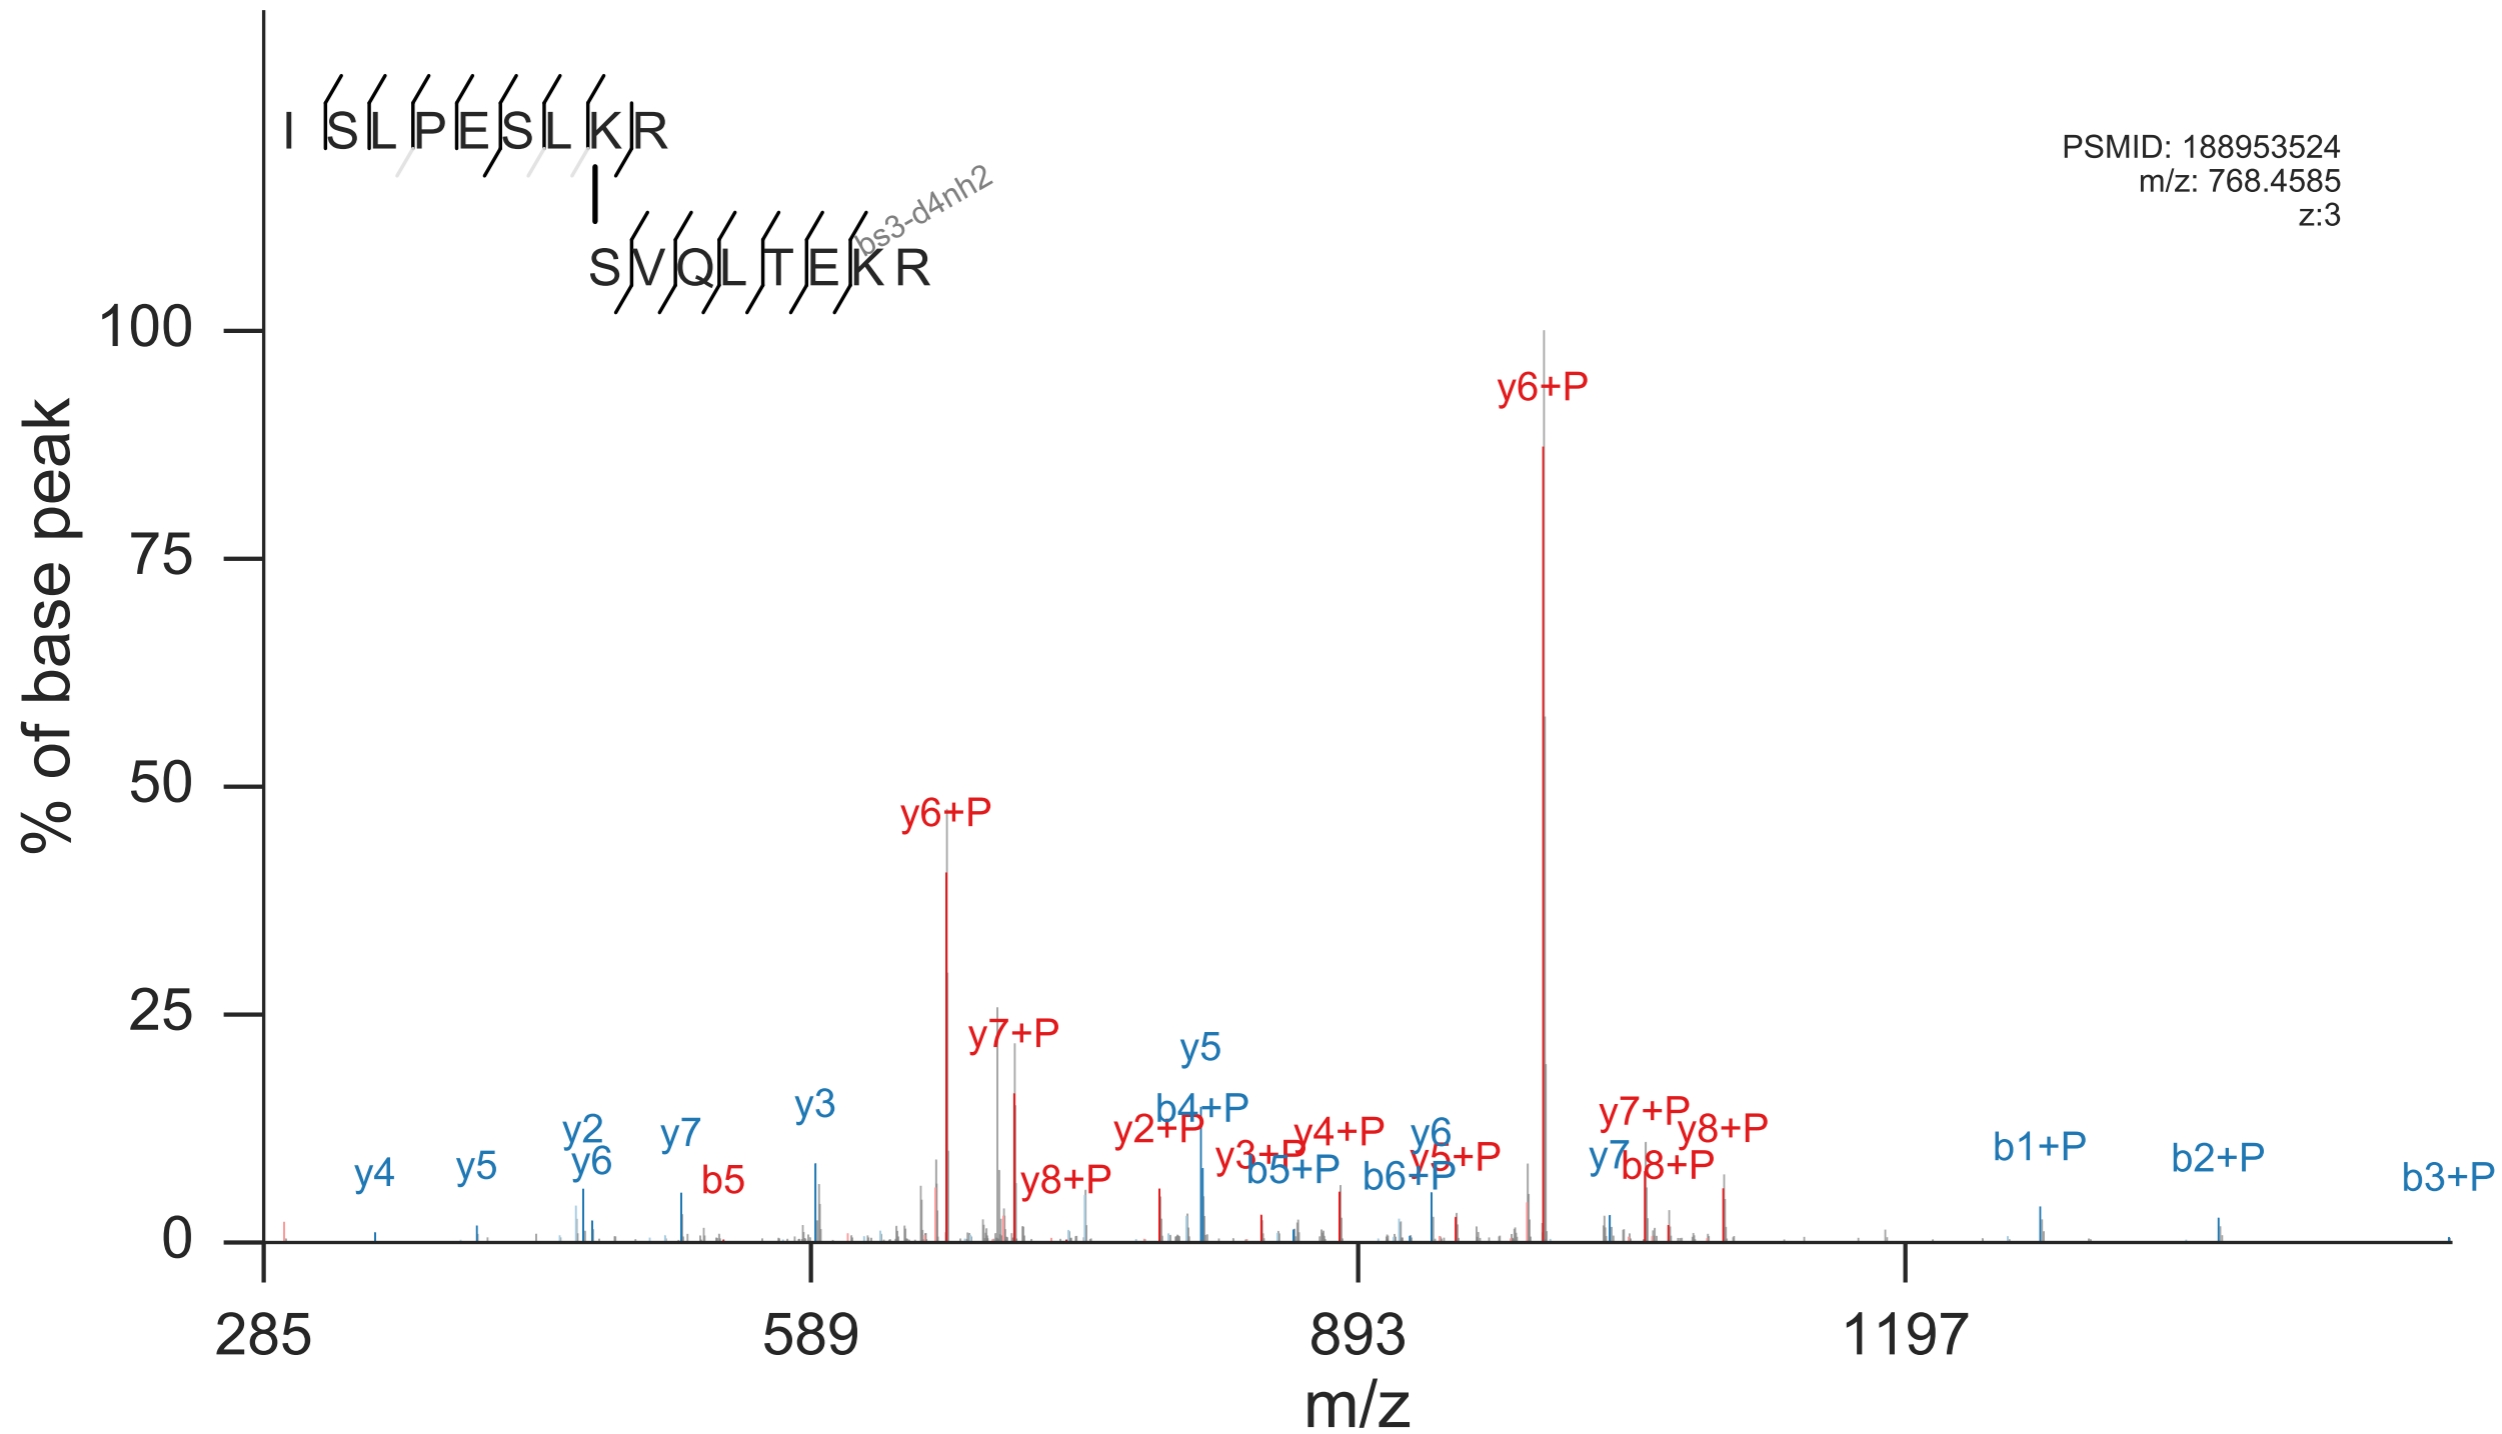

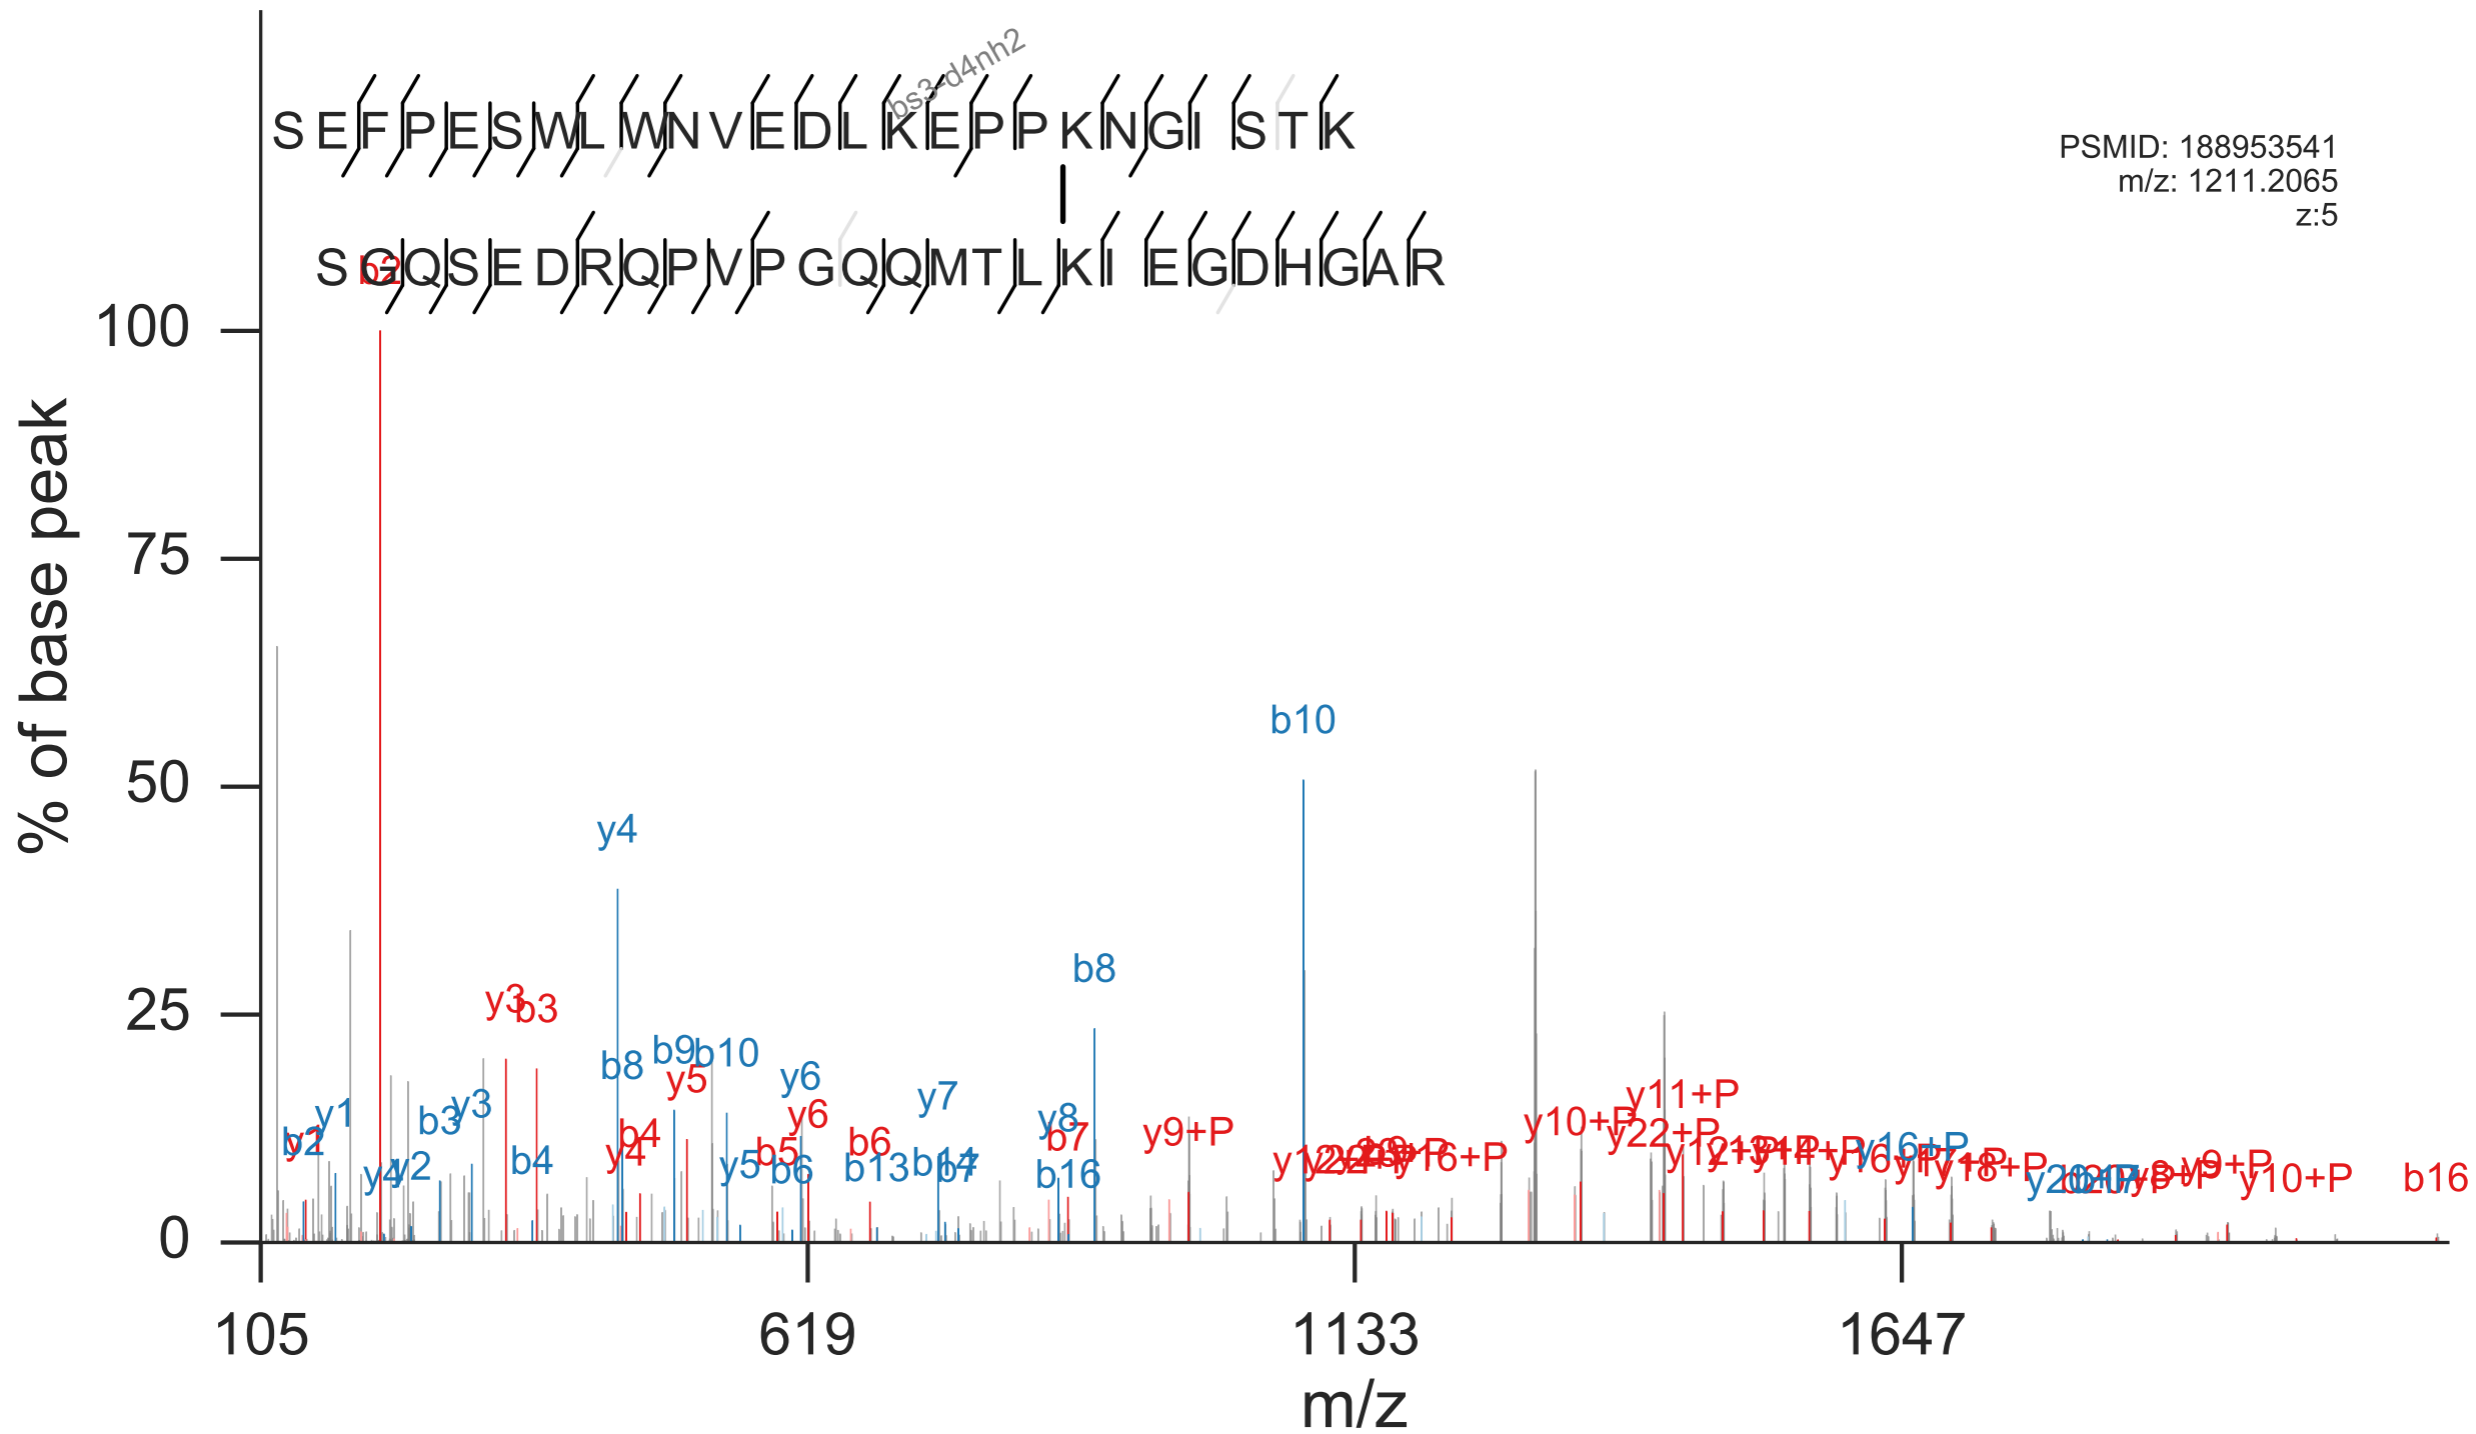

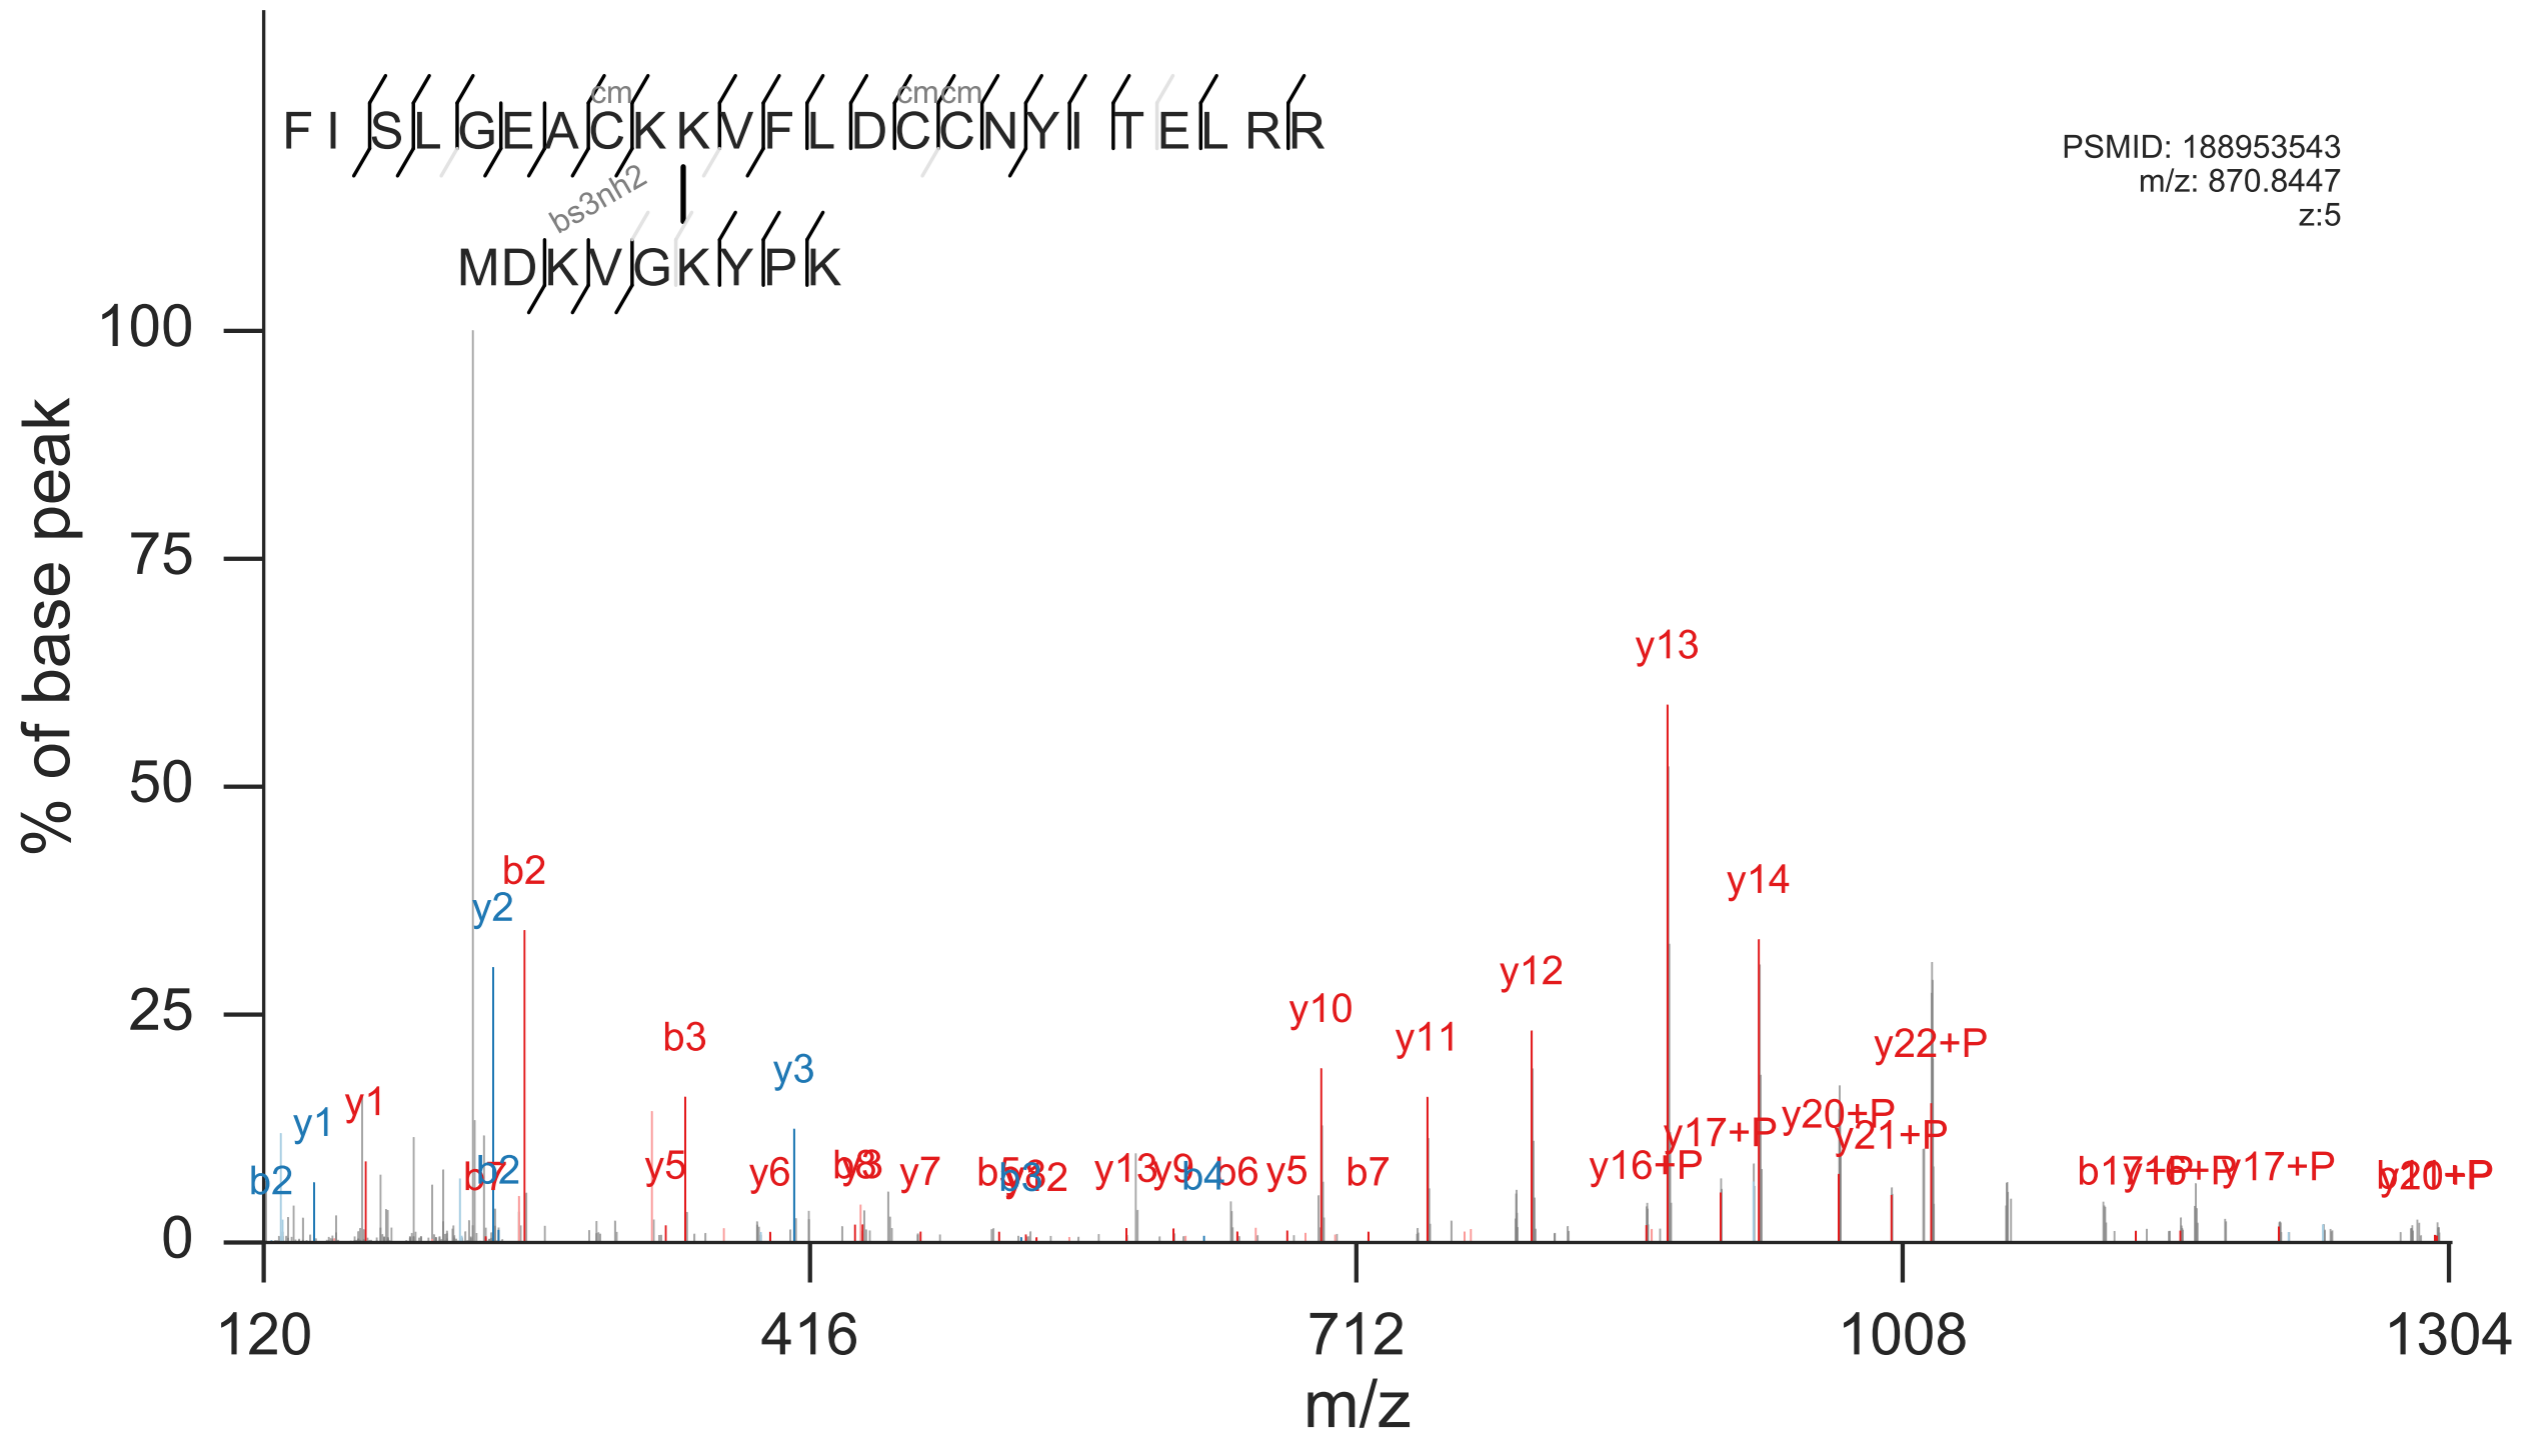

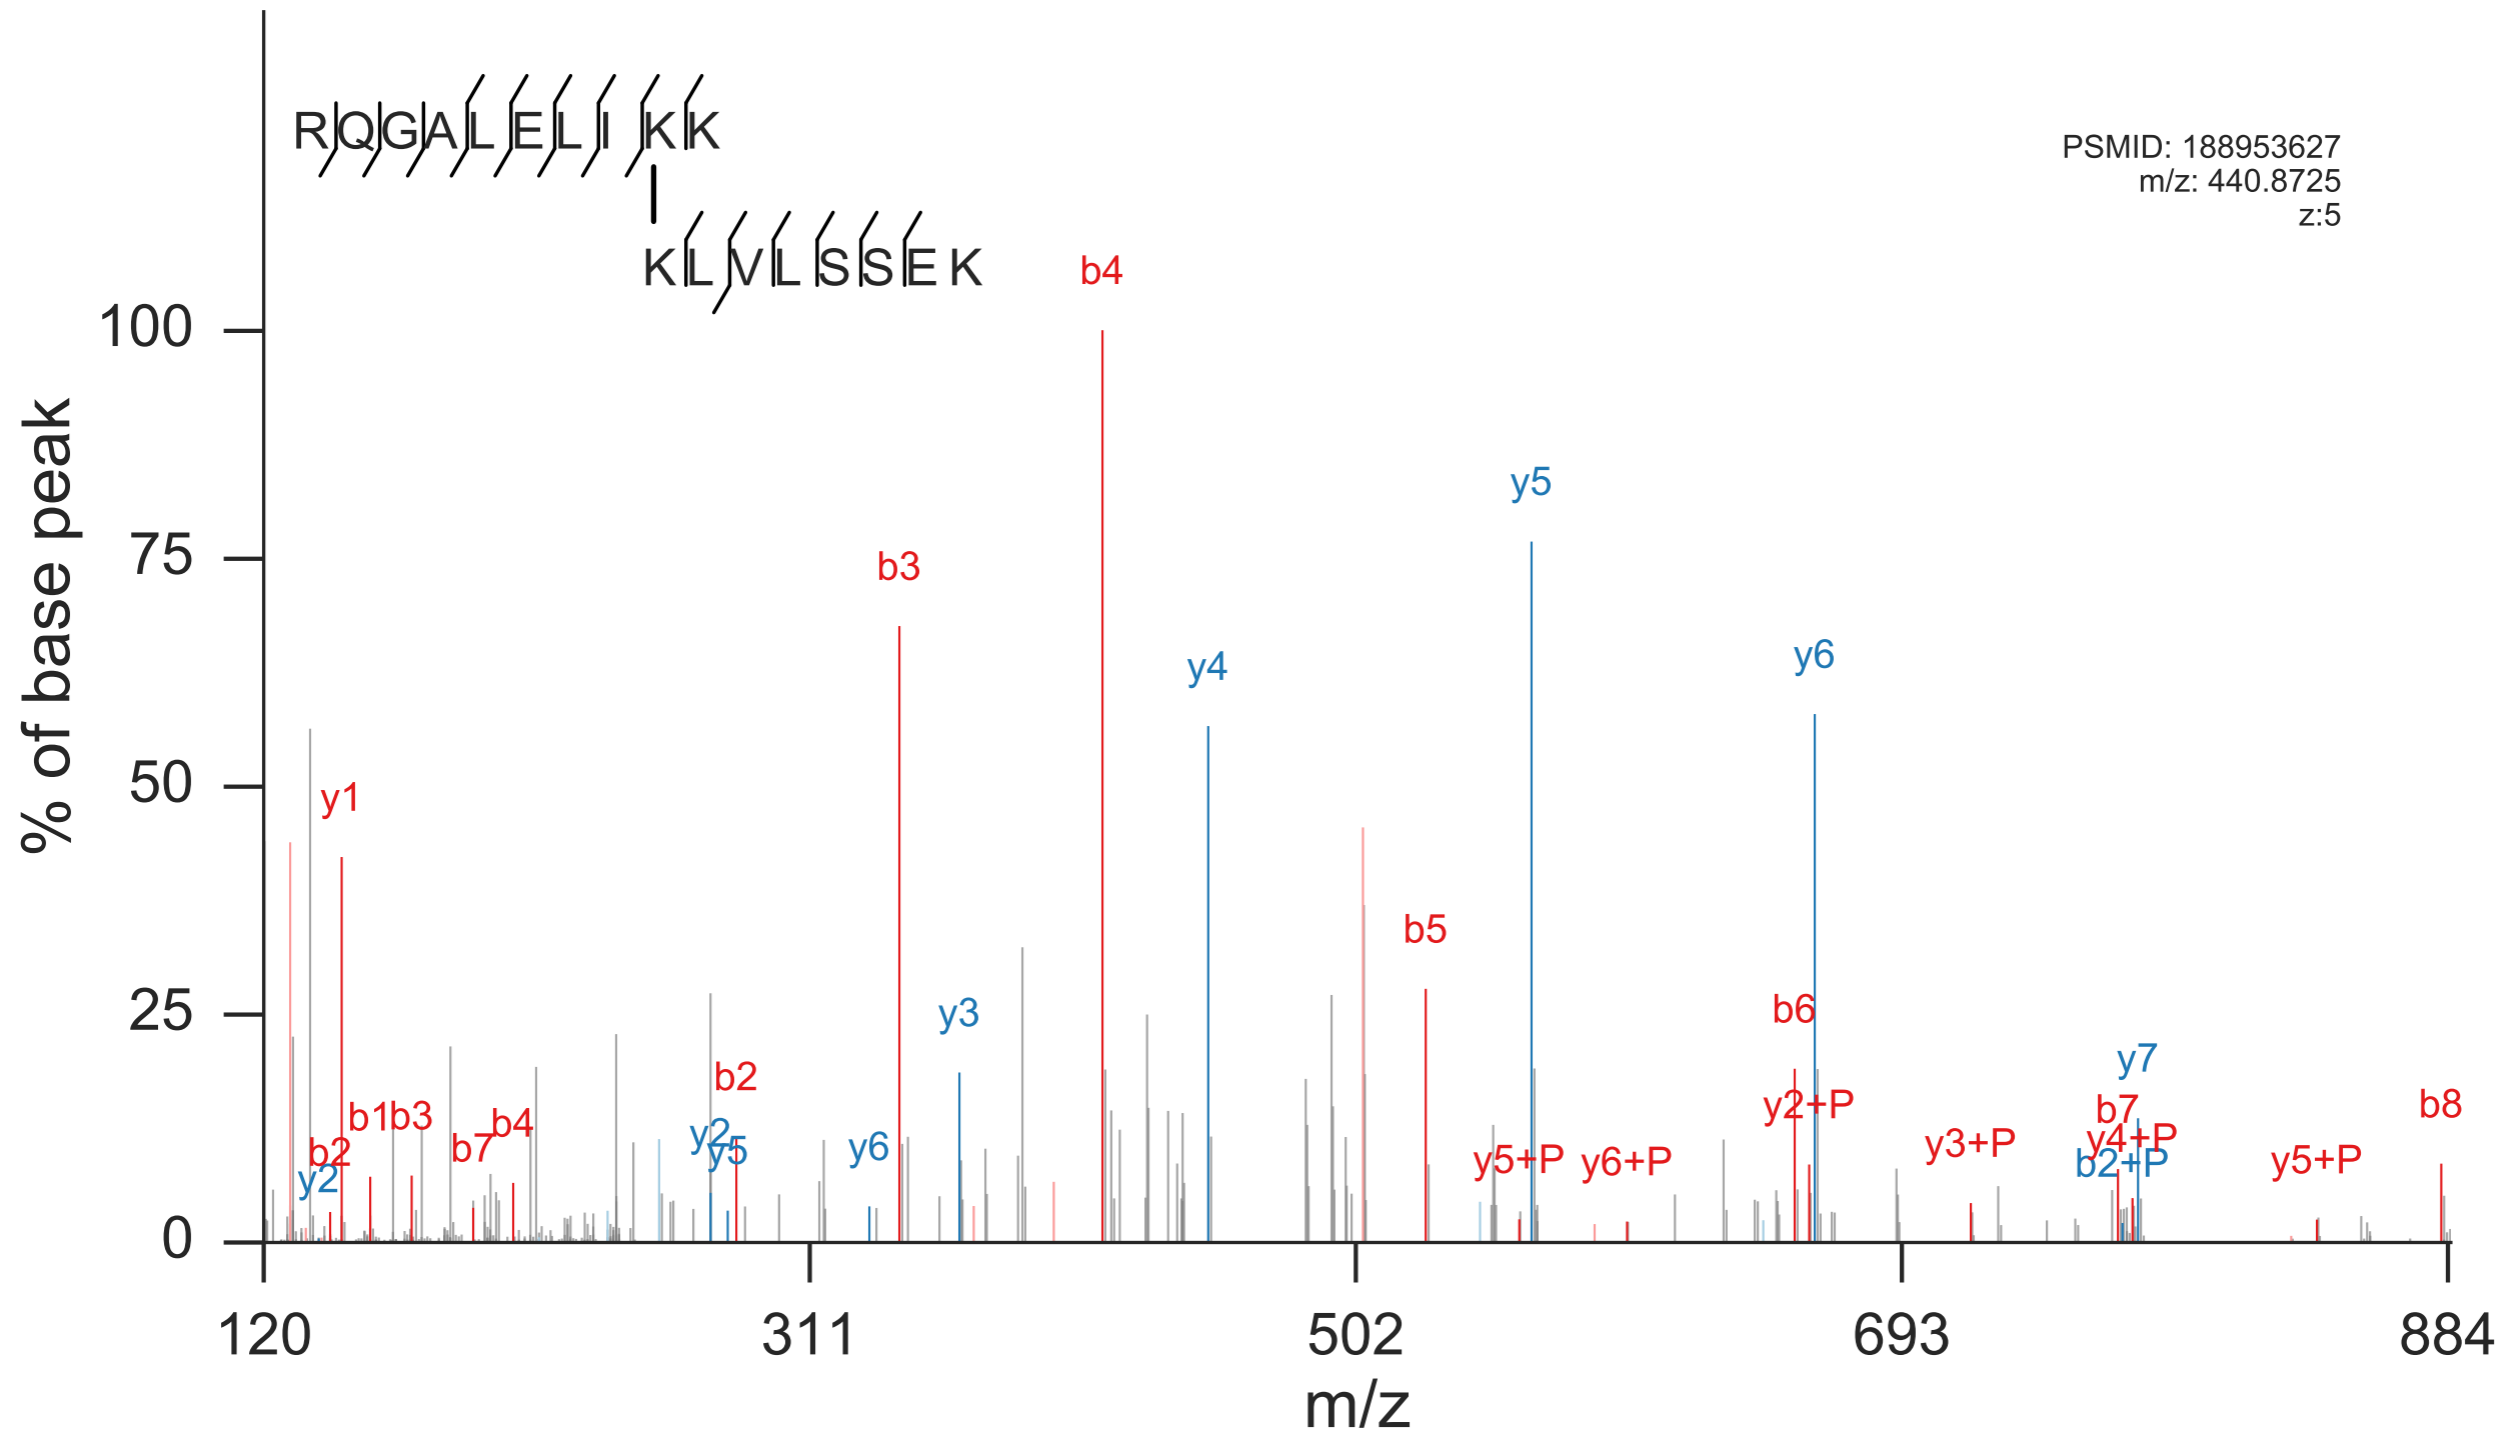

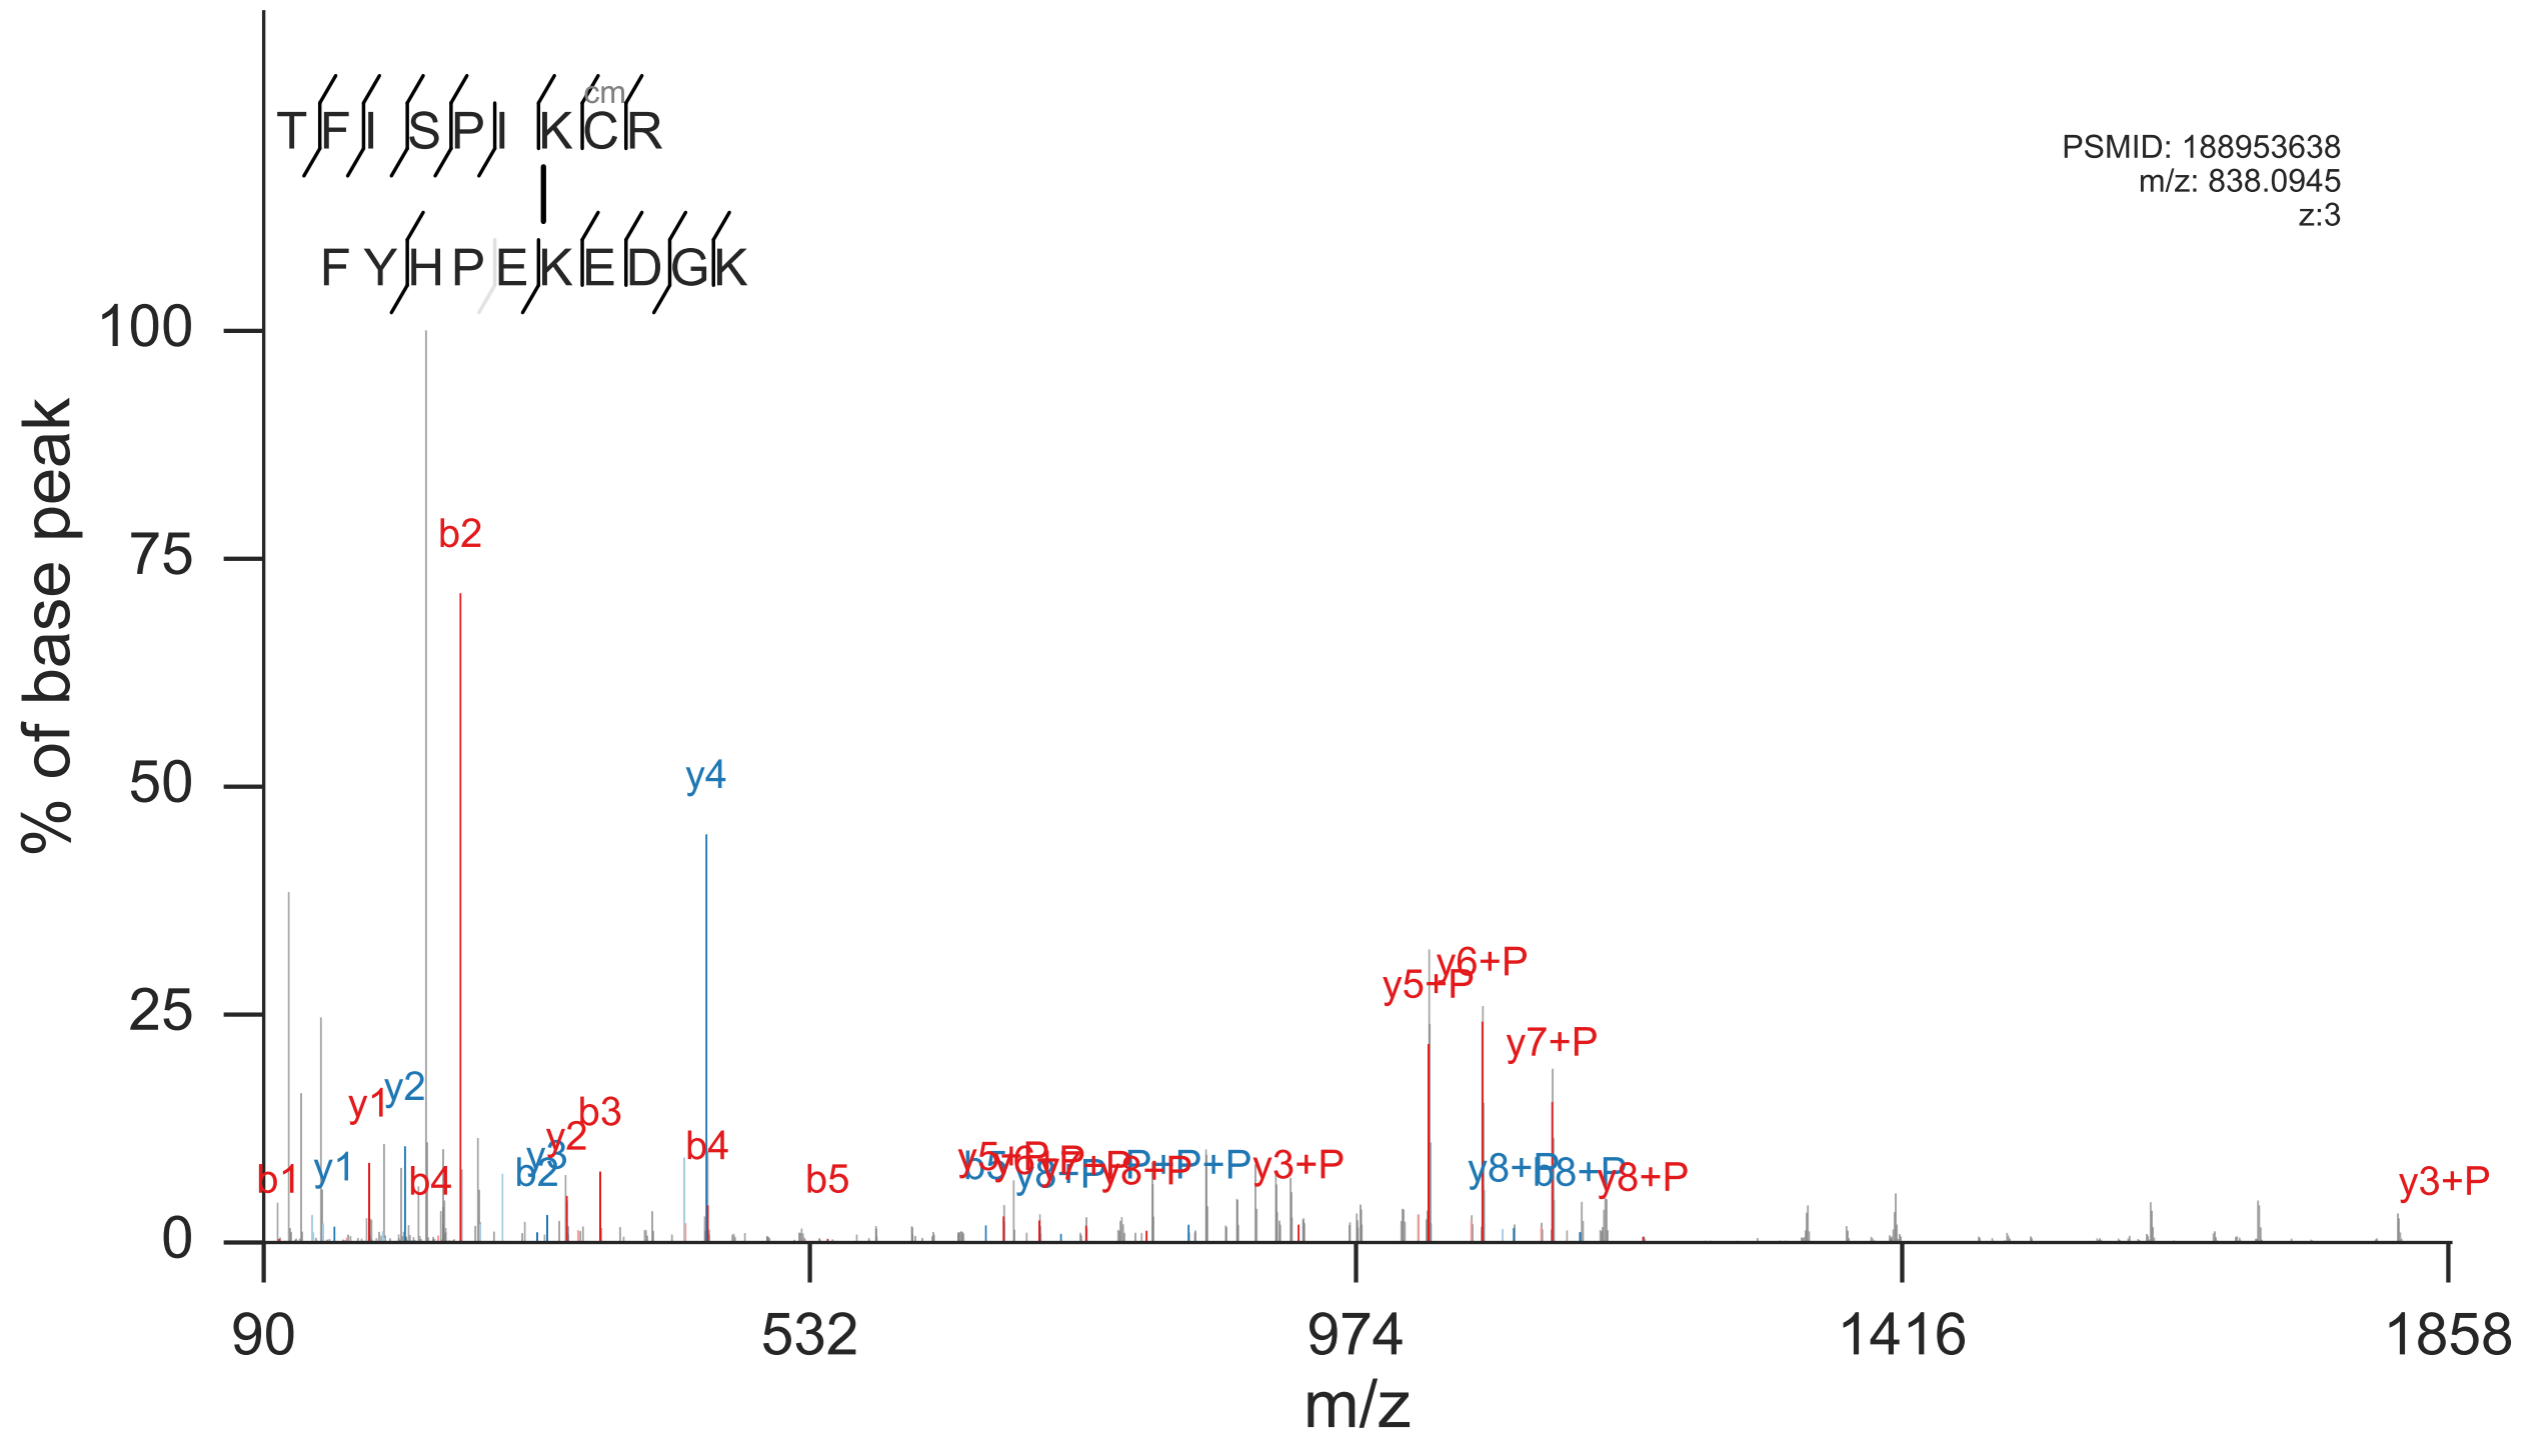

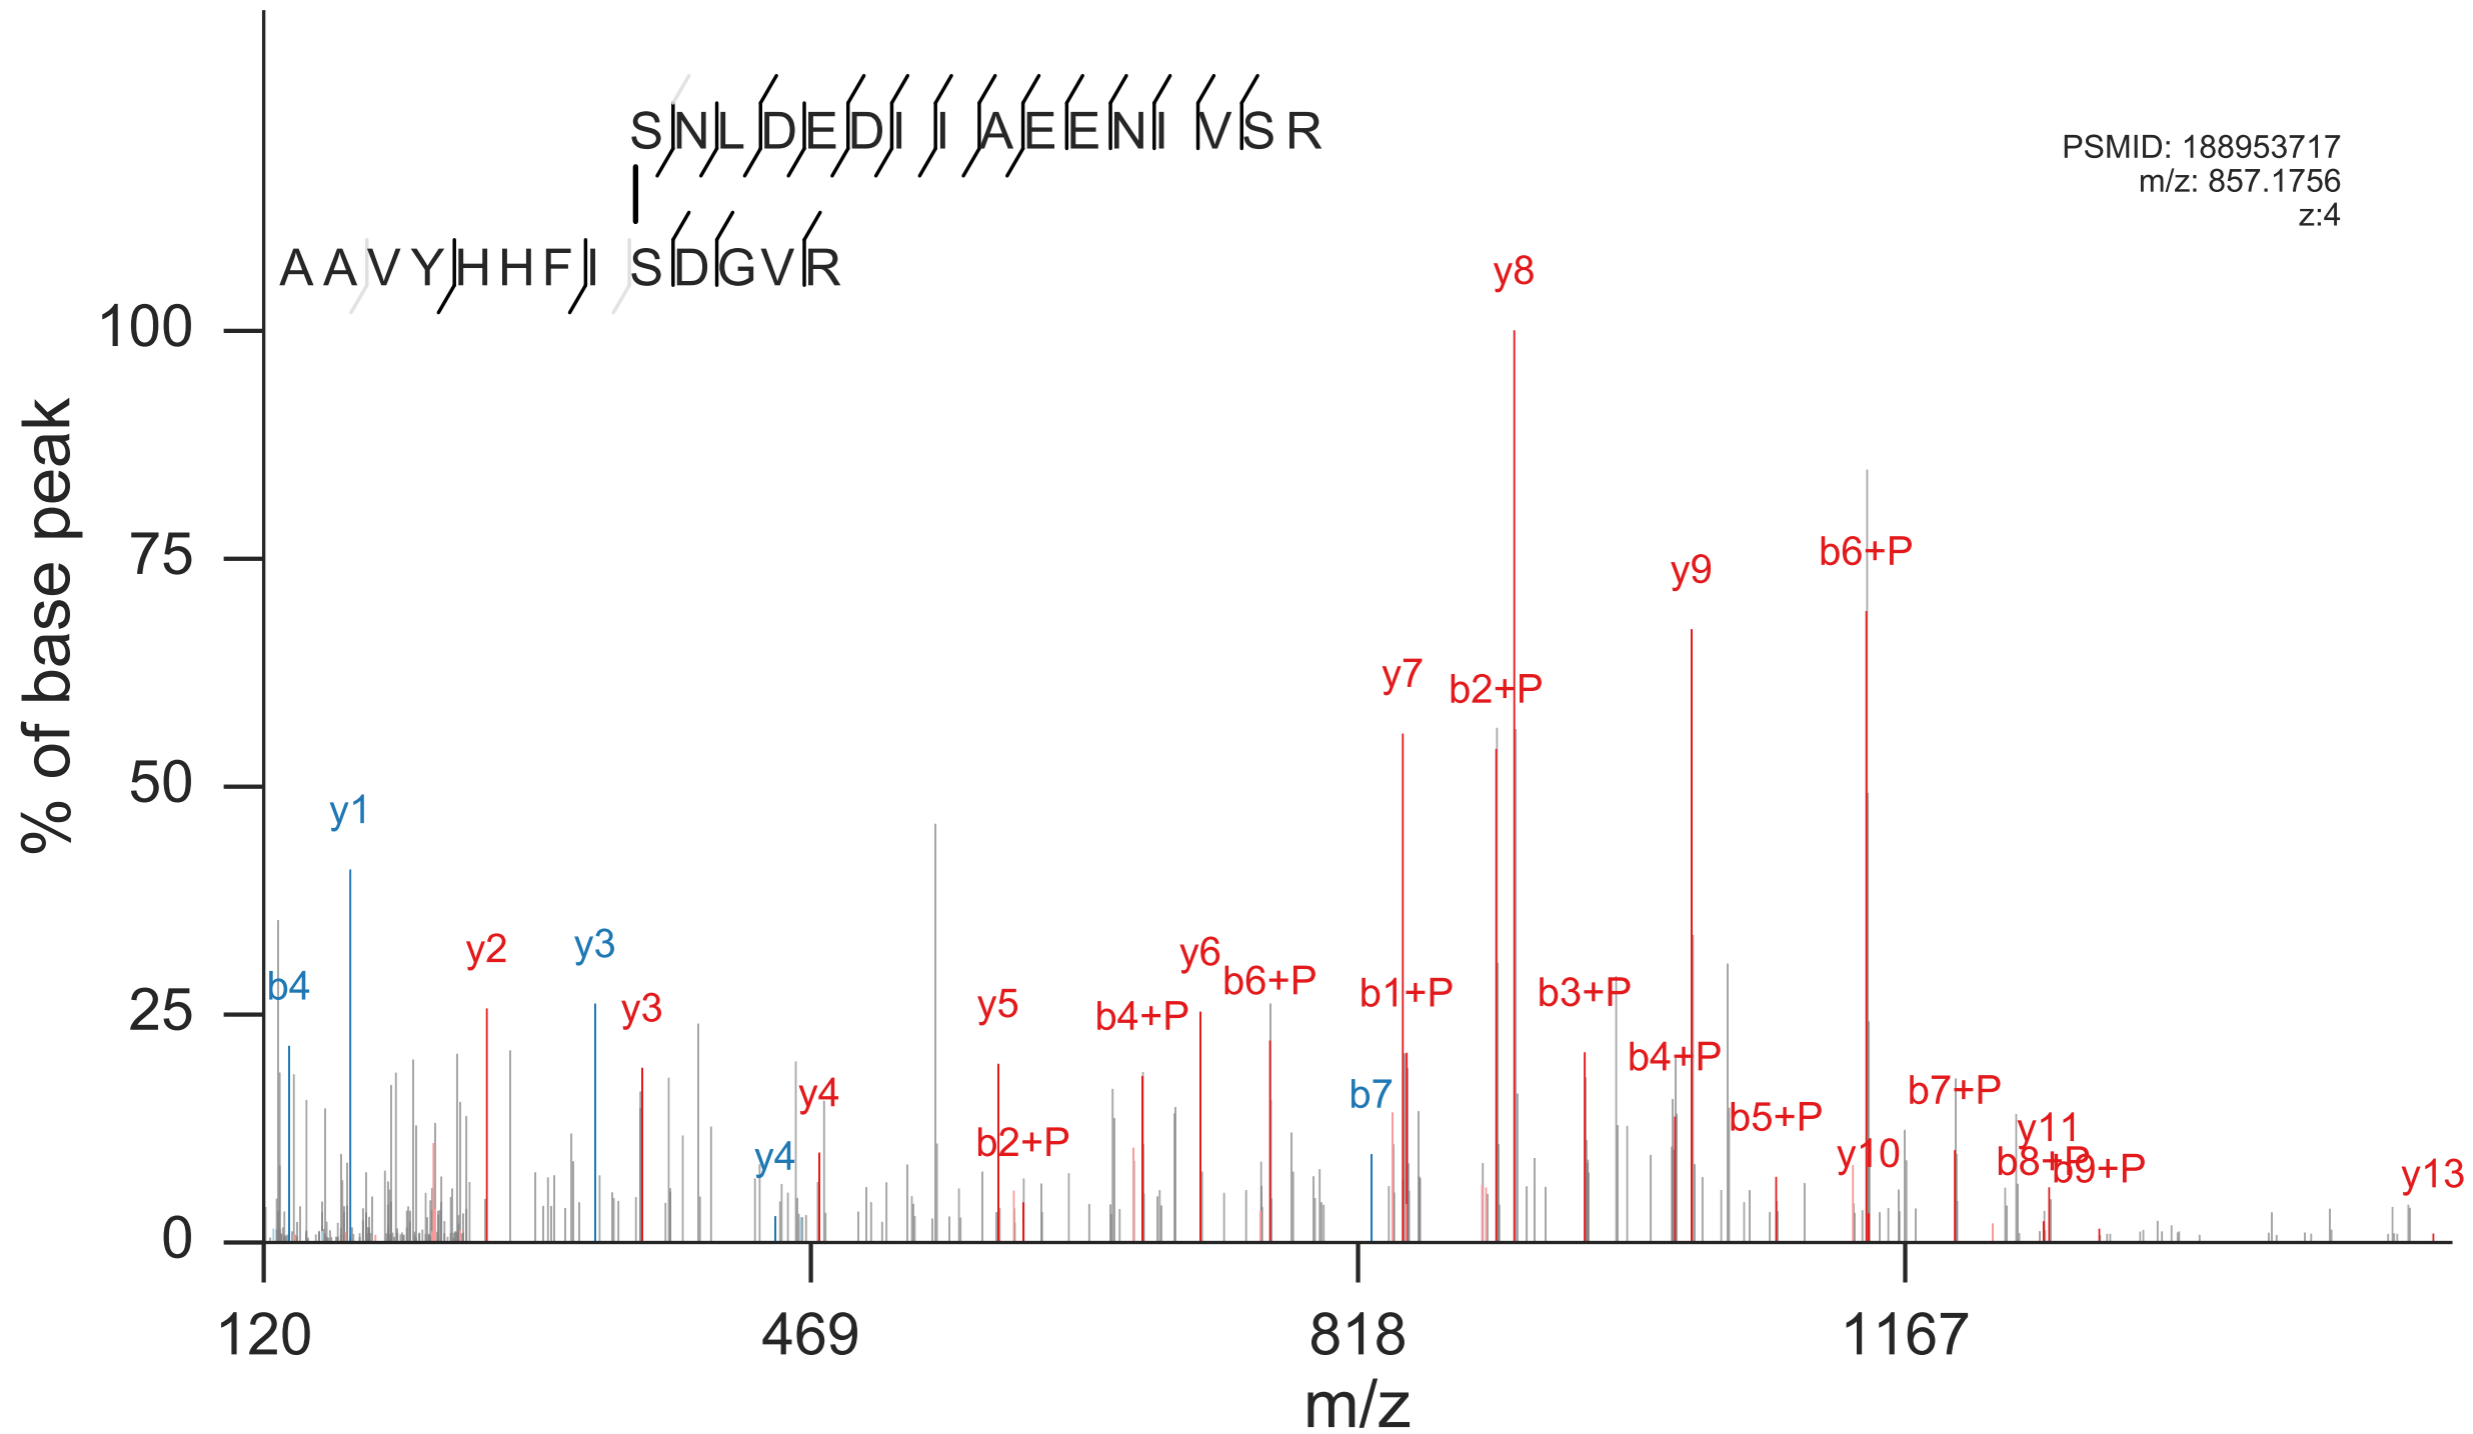

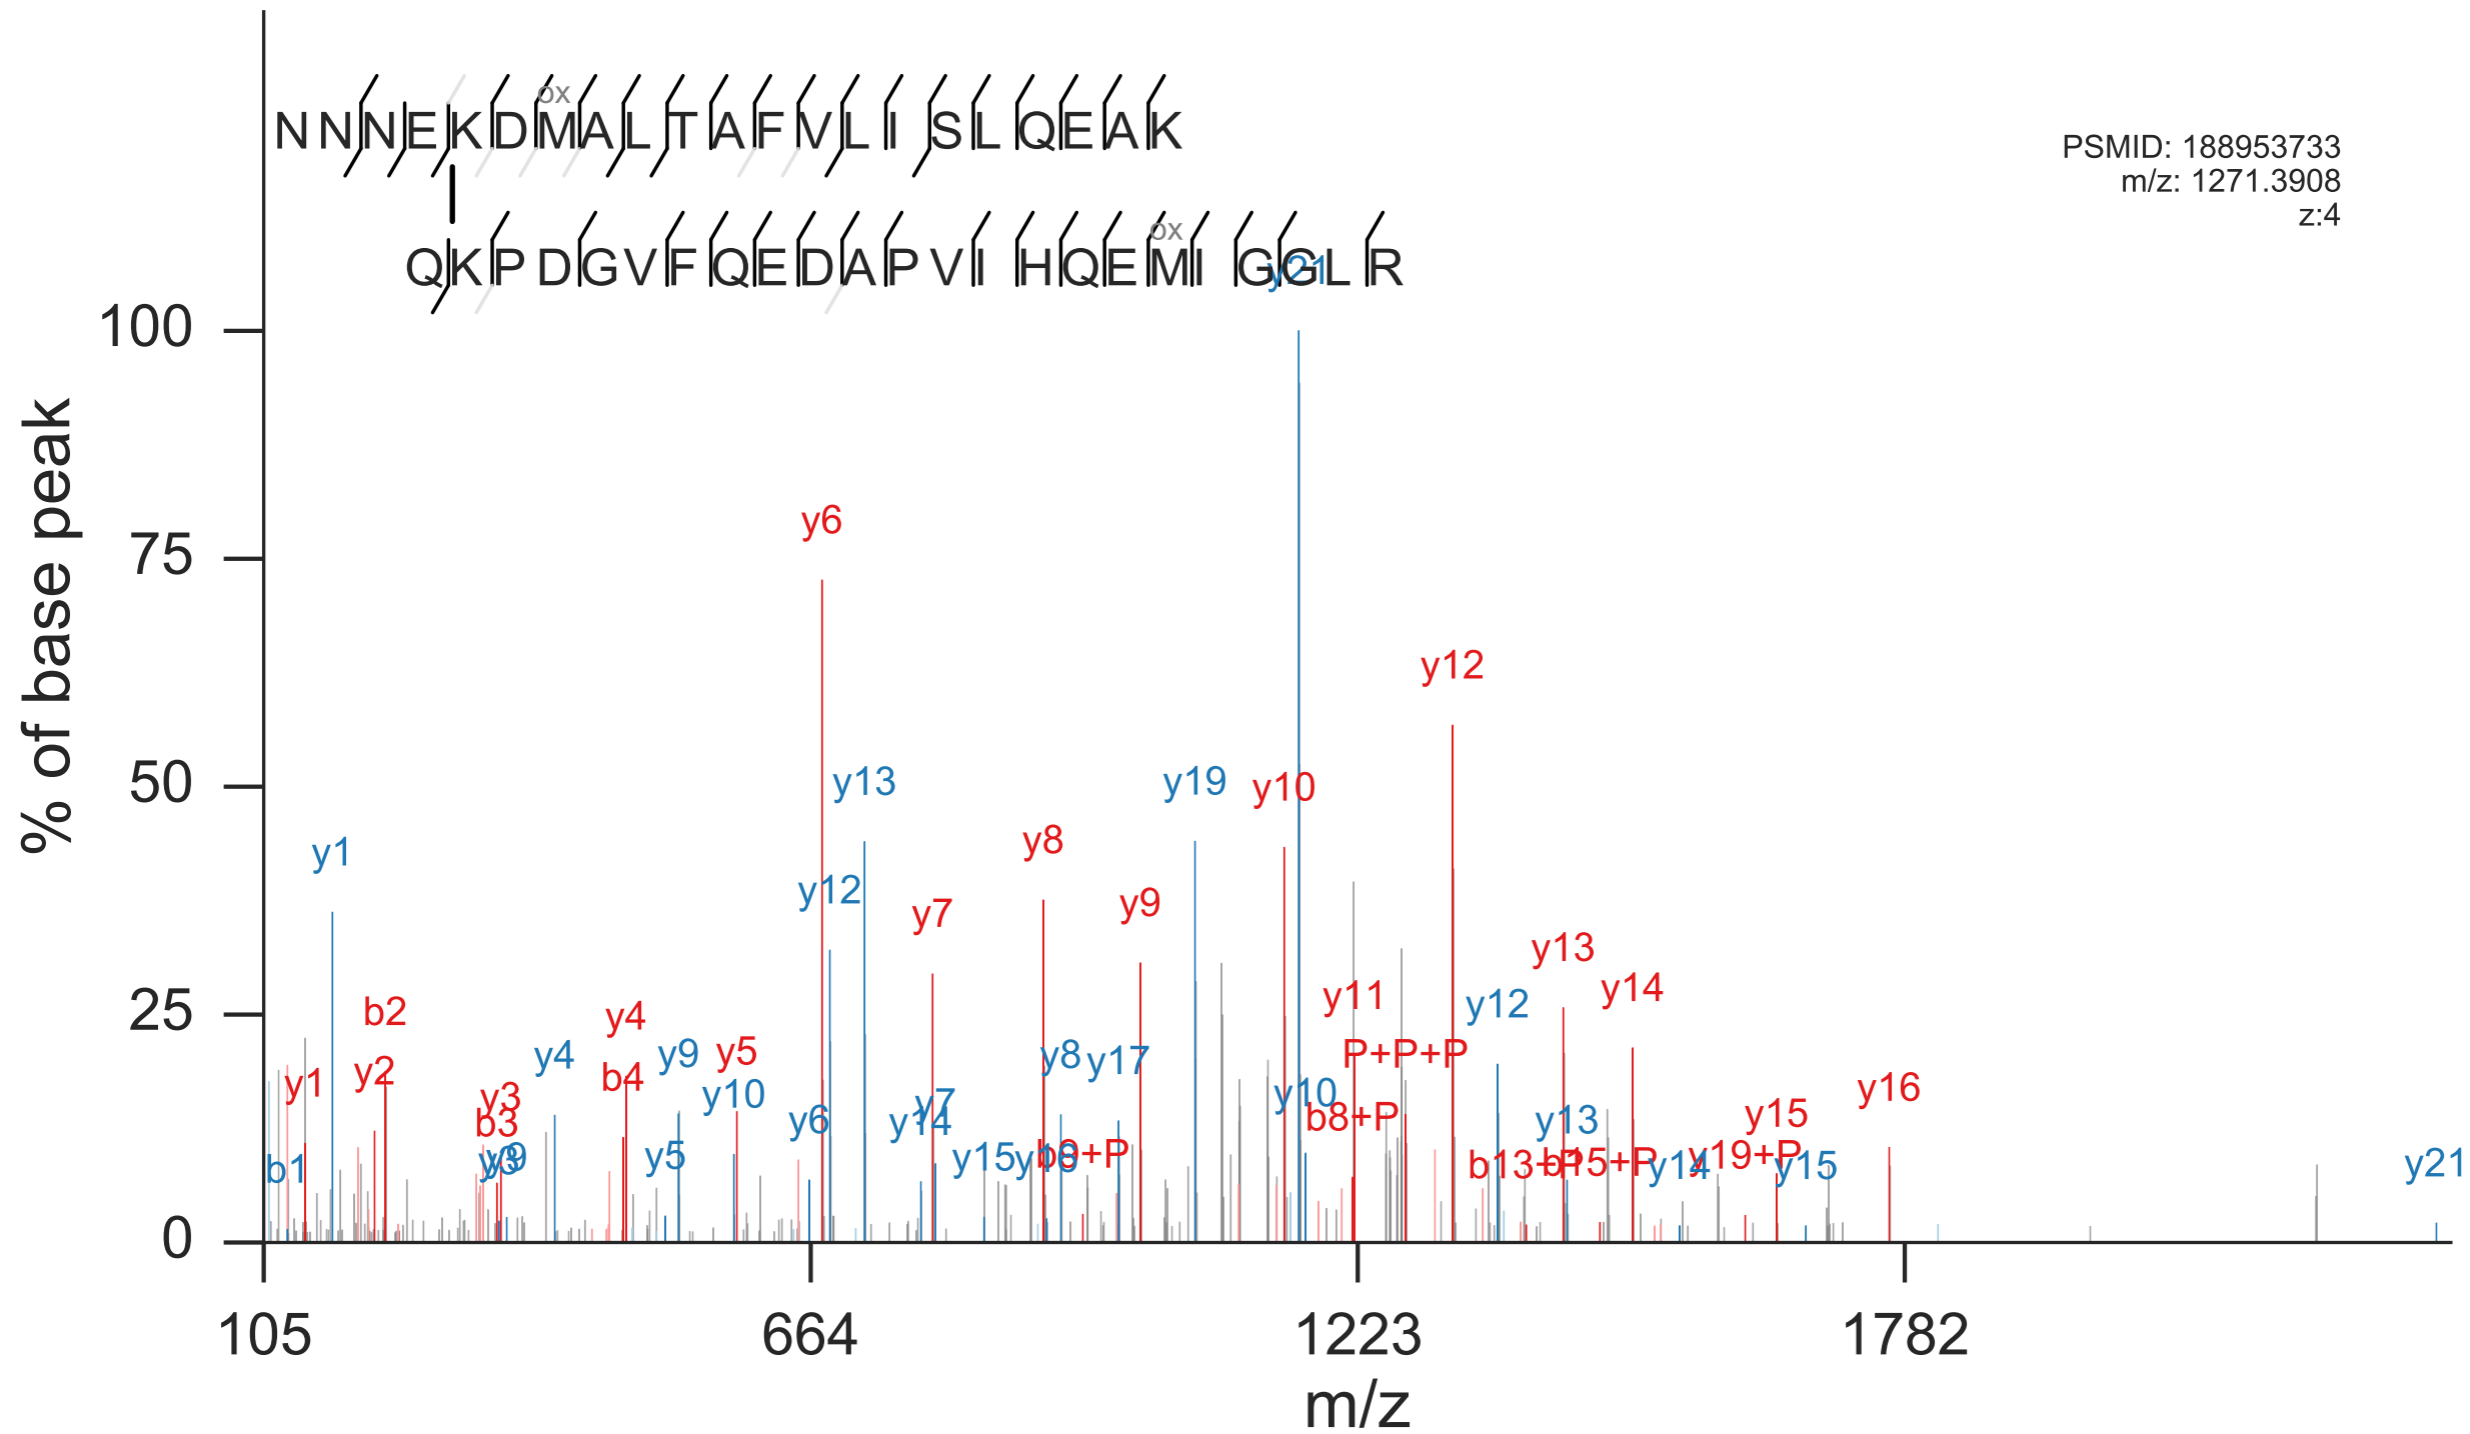

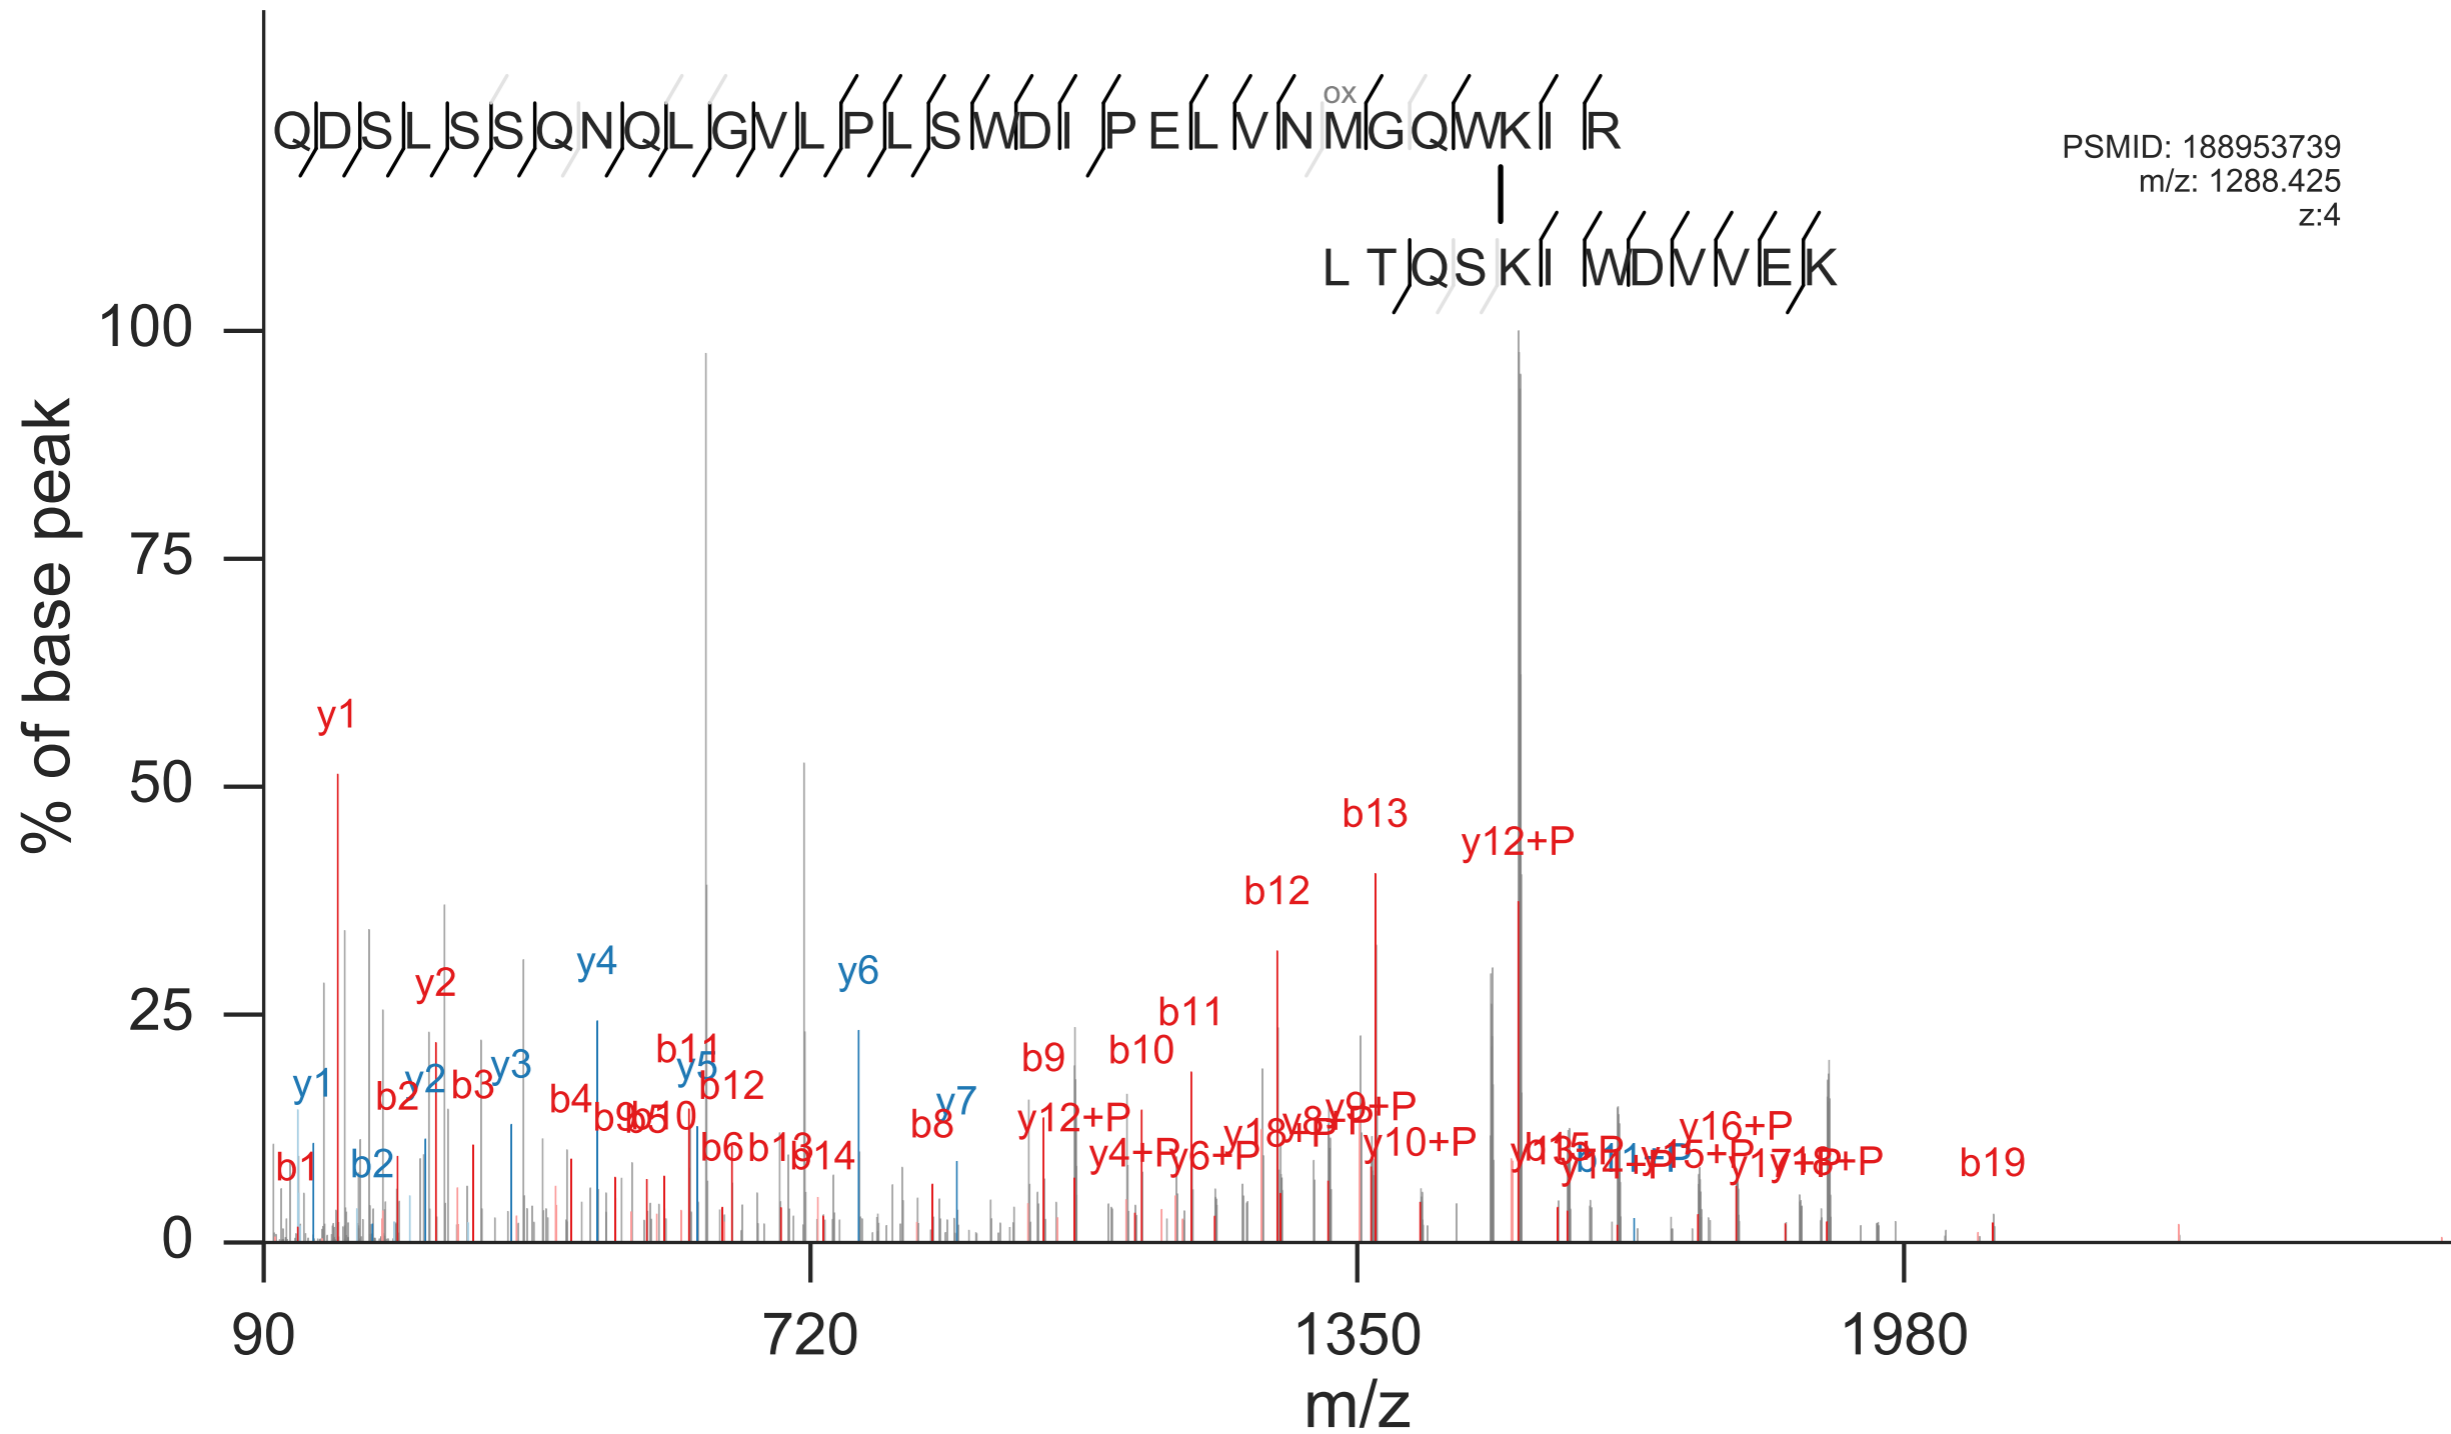

Q D S L S S Q N Q L G V L P L S M D I P E L V N M G Q W K I R

L T Q S K I M D V V E K

PSMID: 188953739  
 m/z: 1288.425  
 z: 4



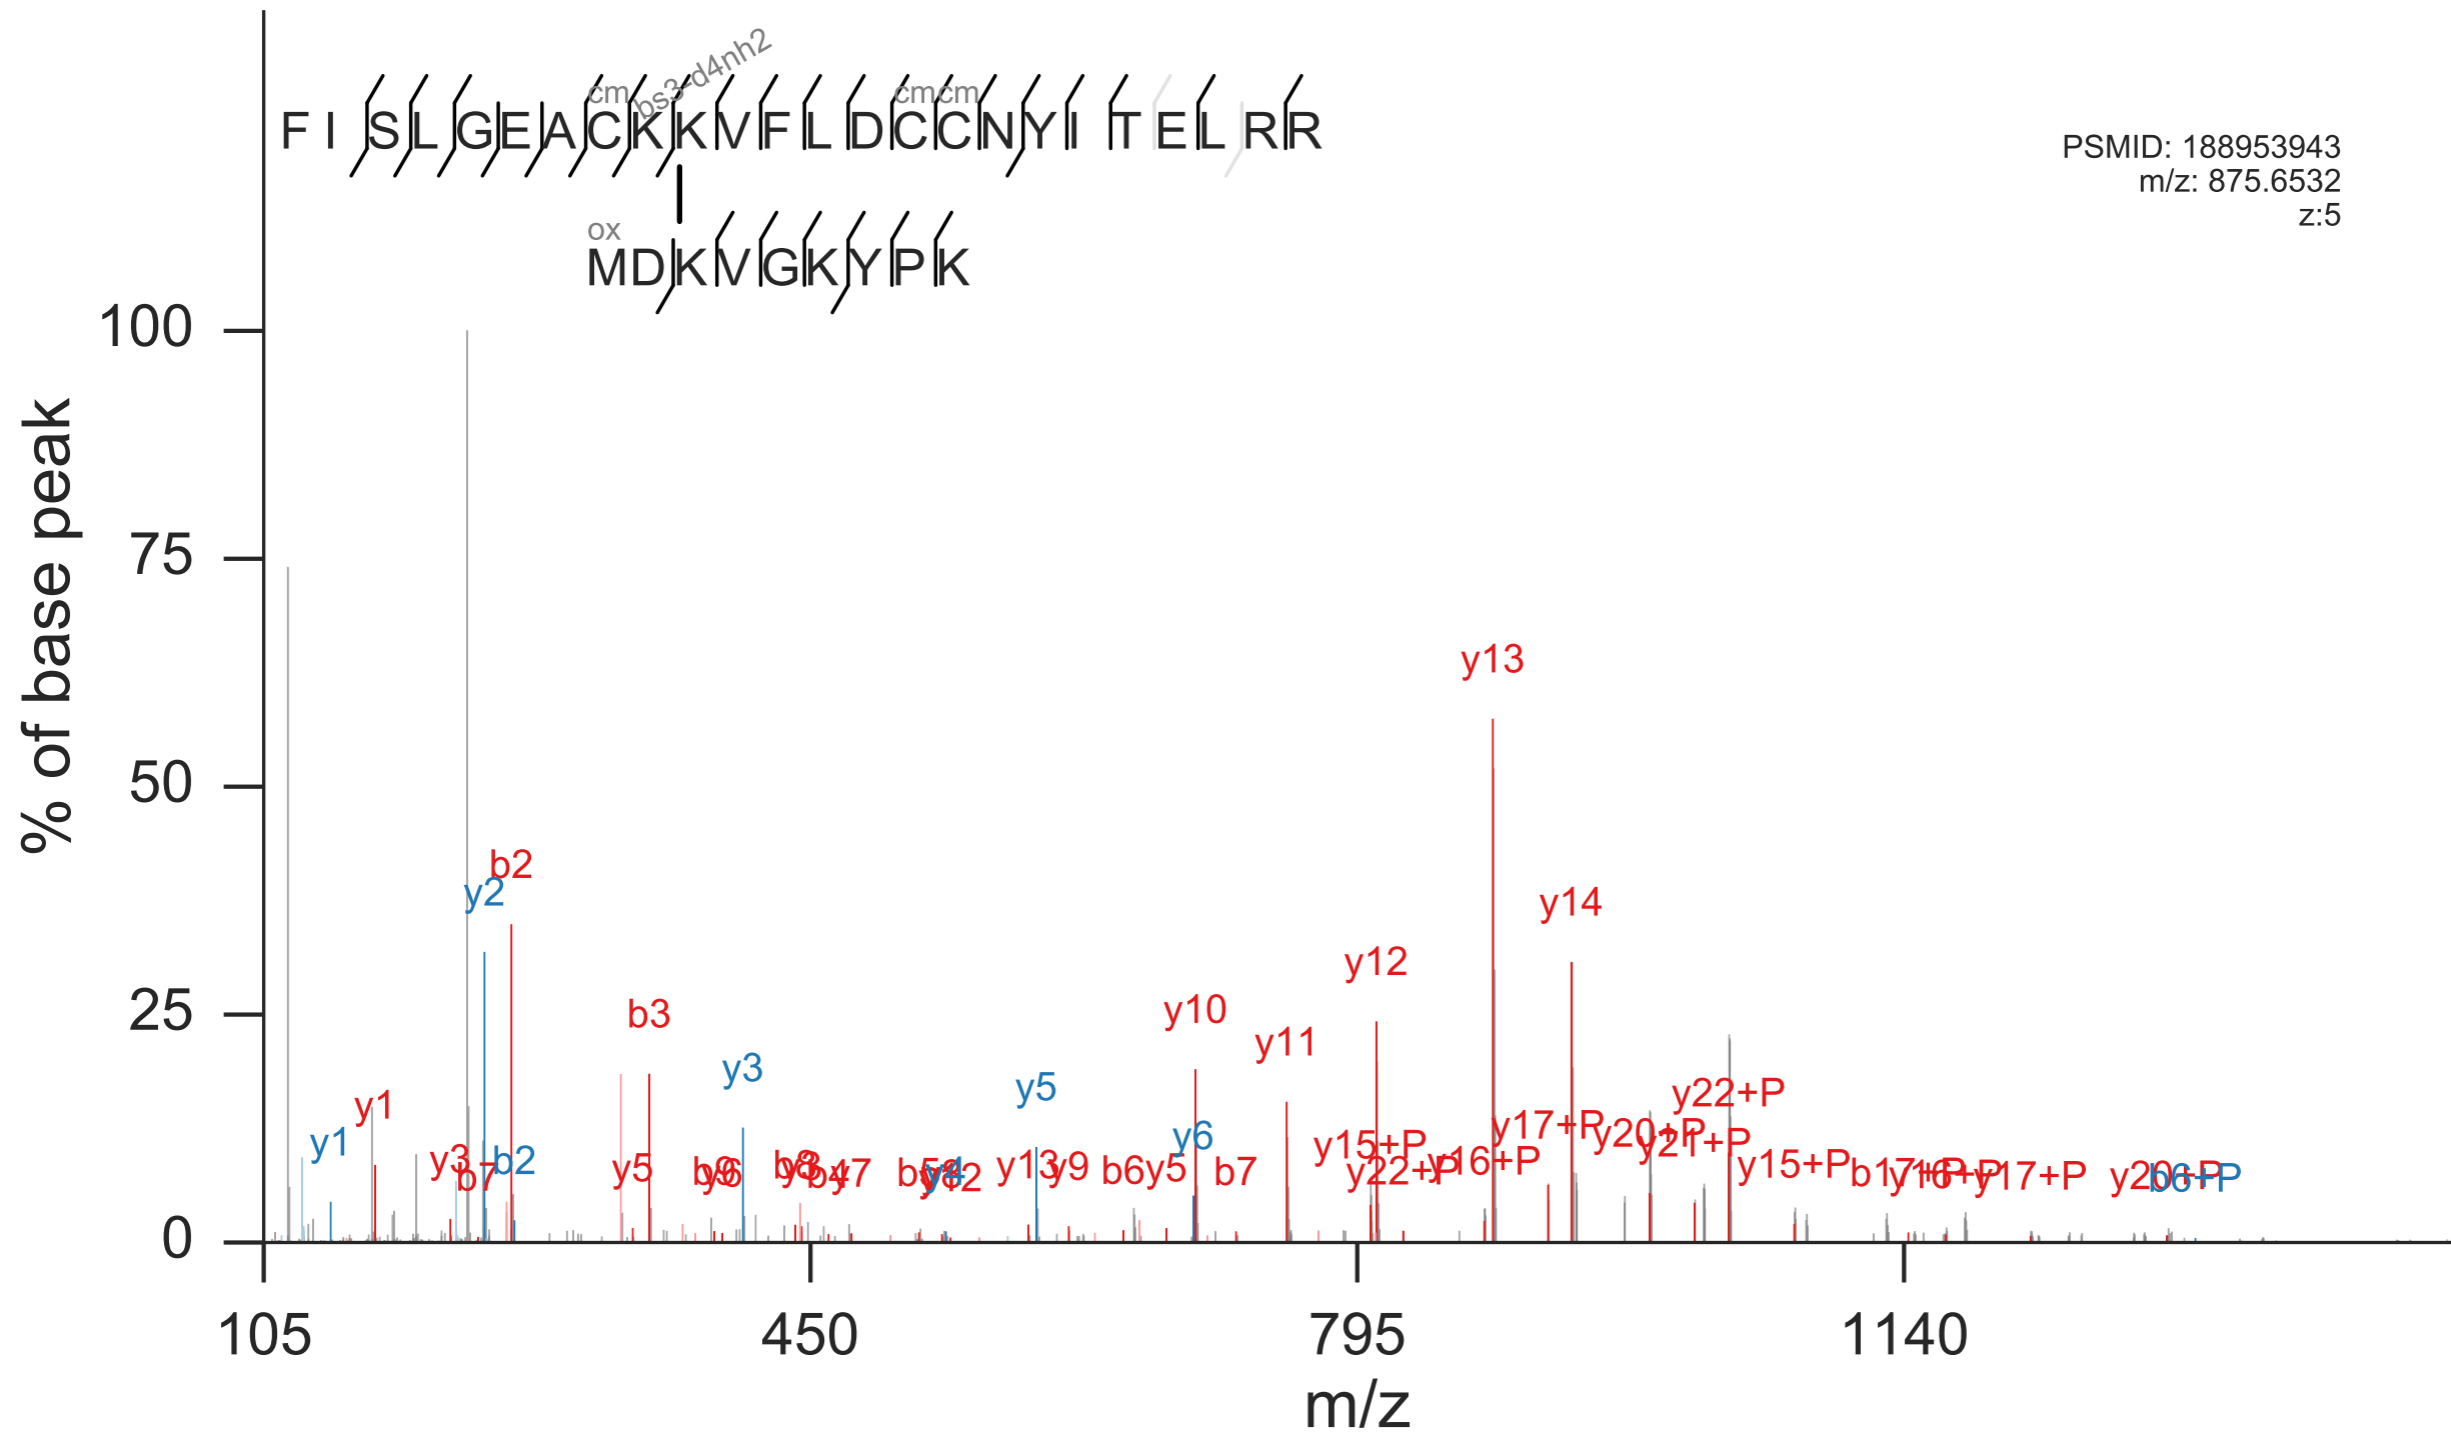

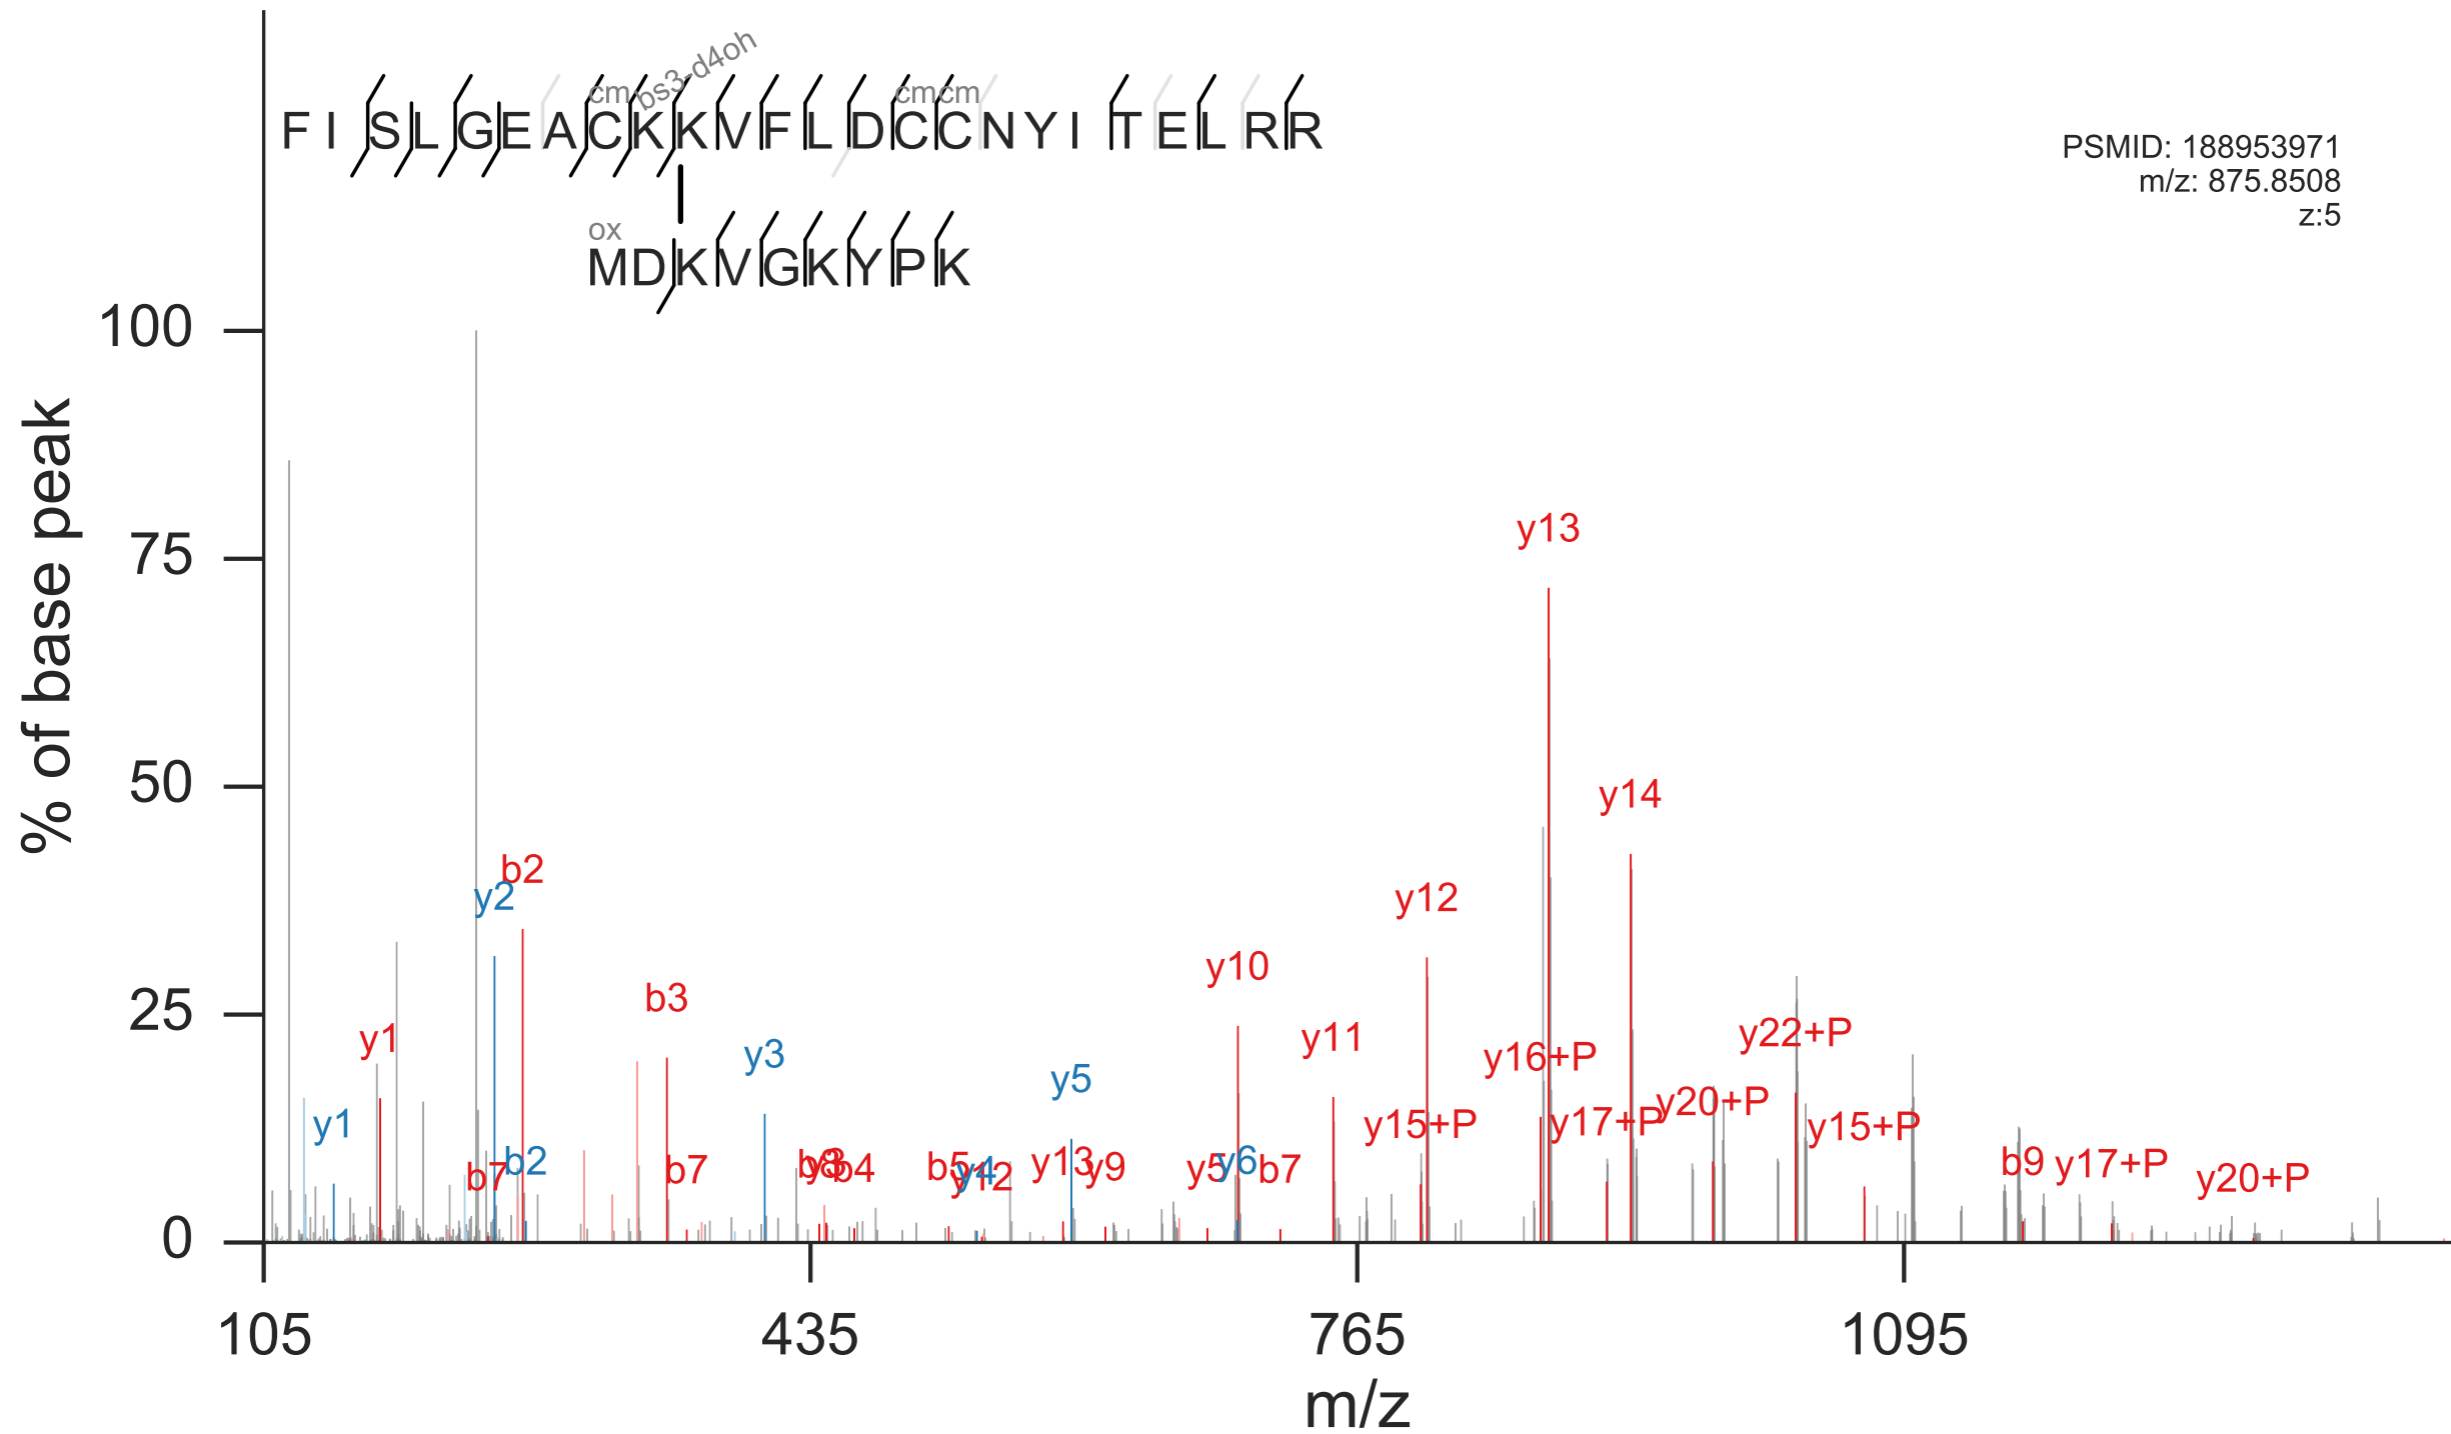

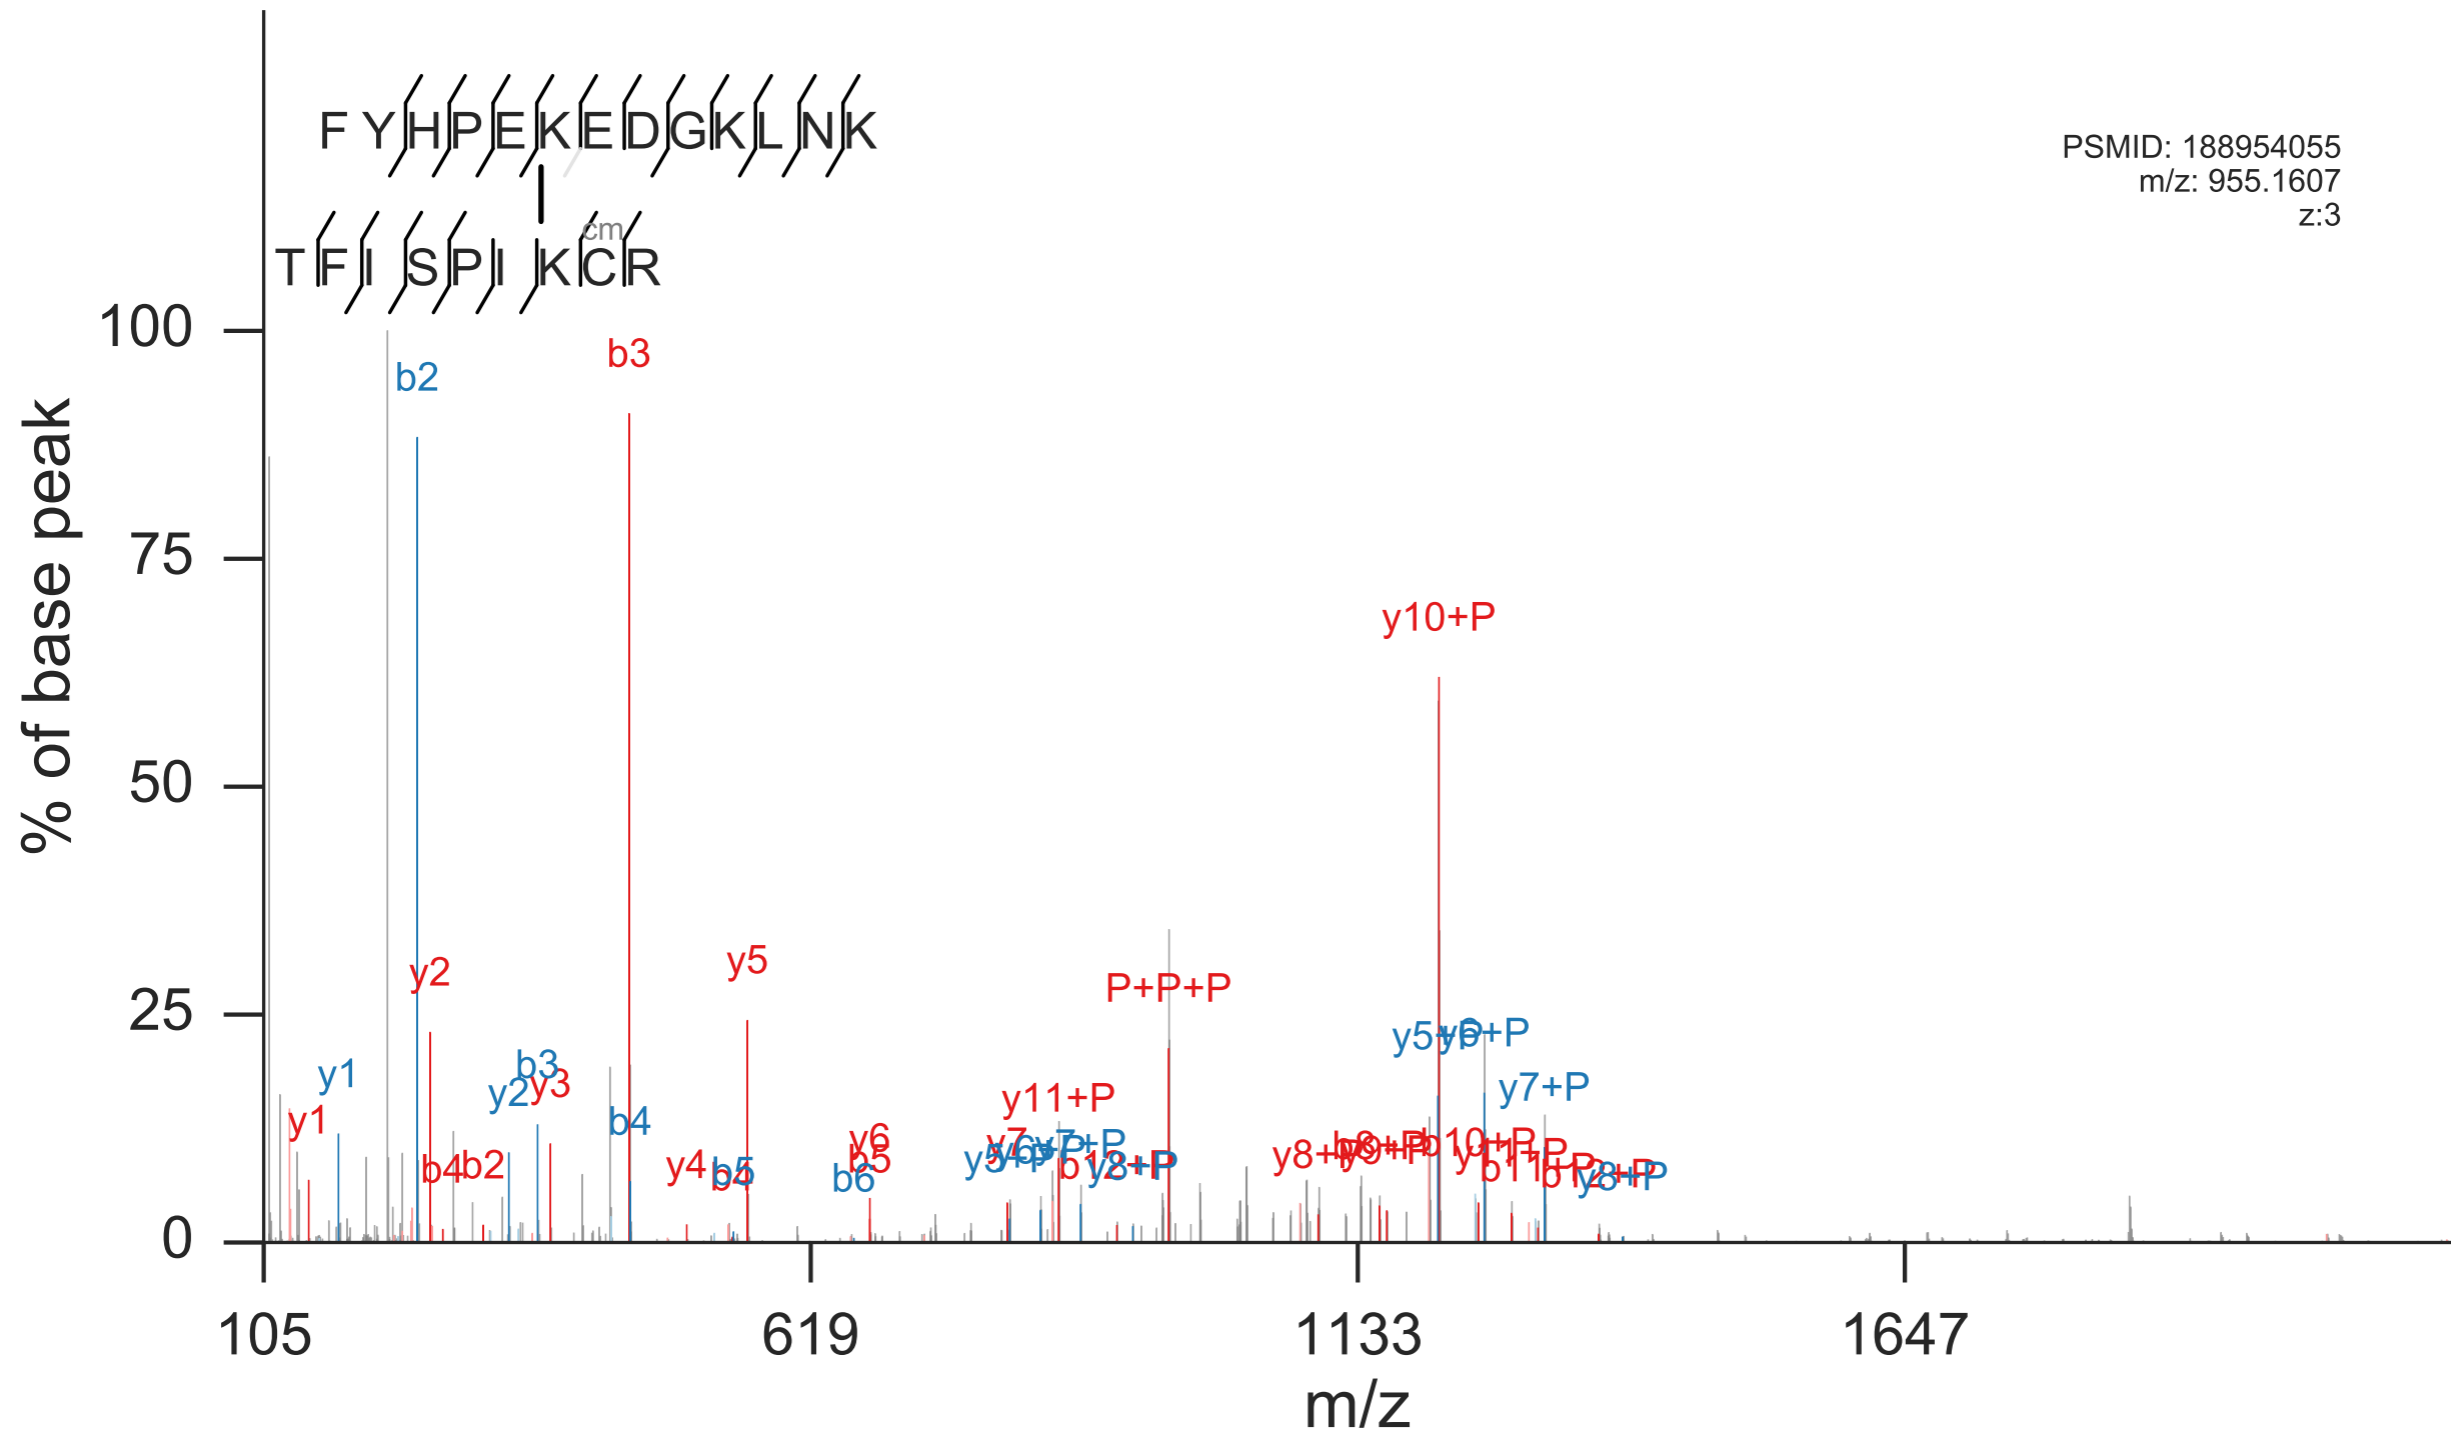

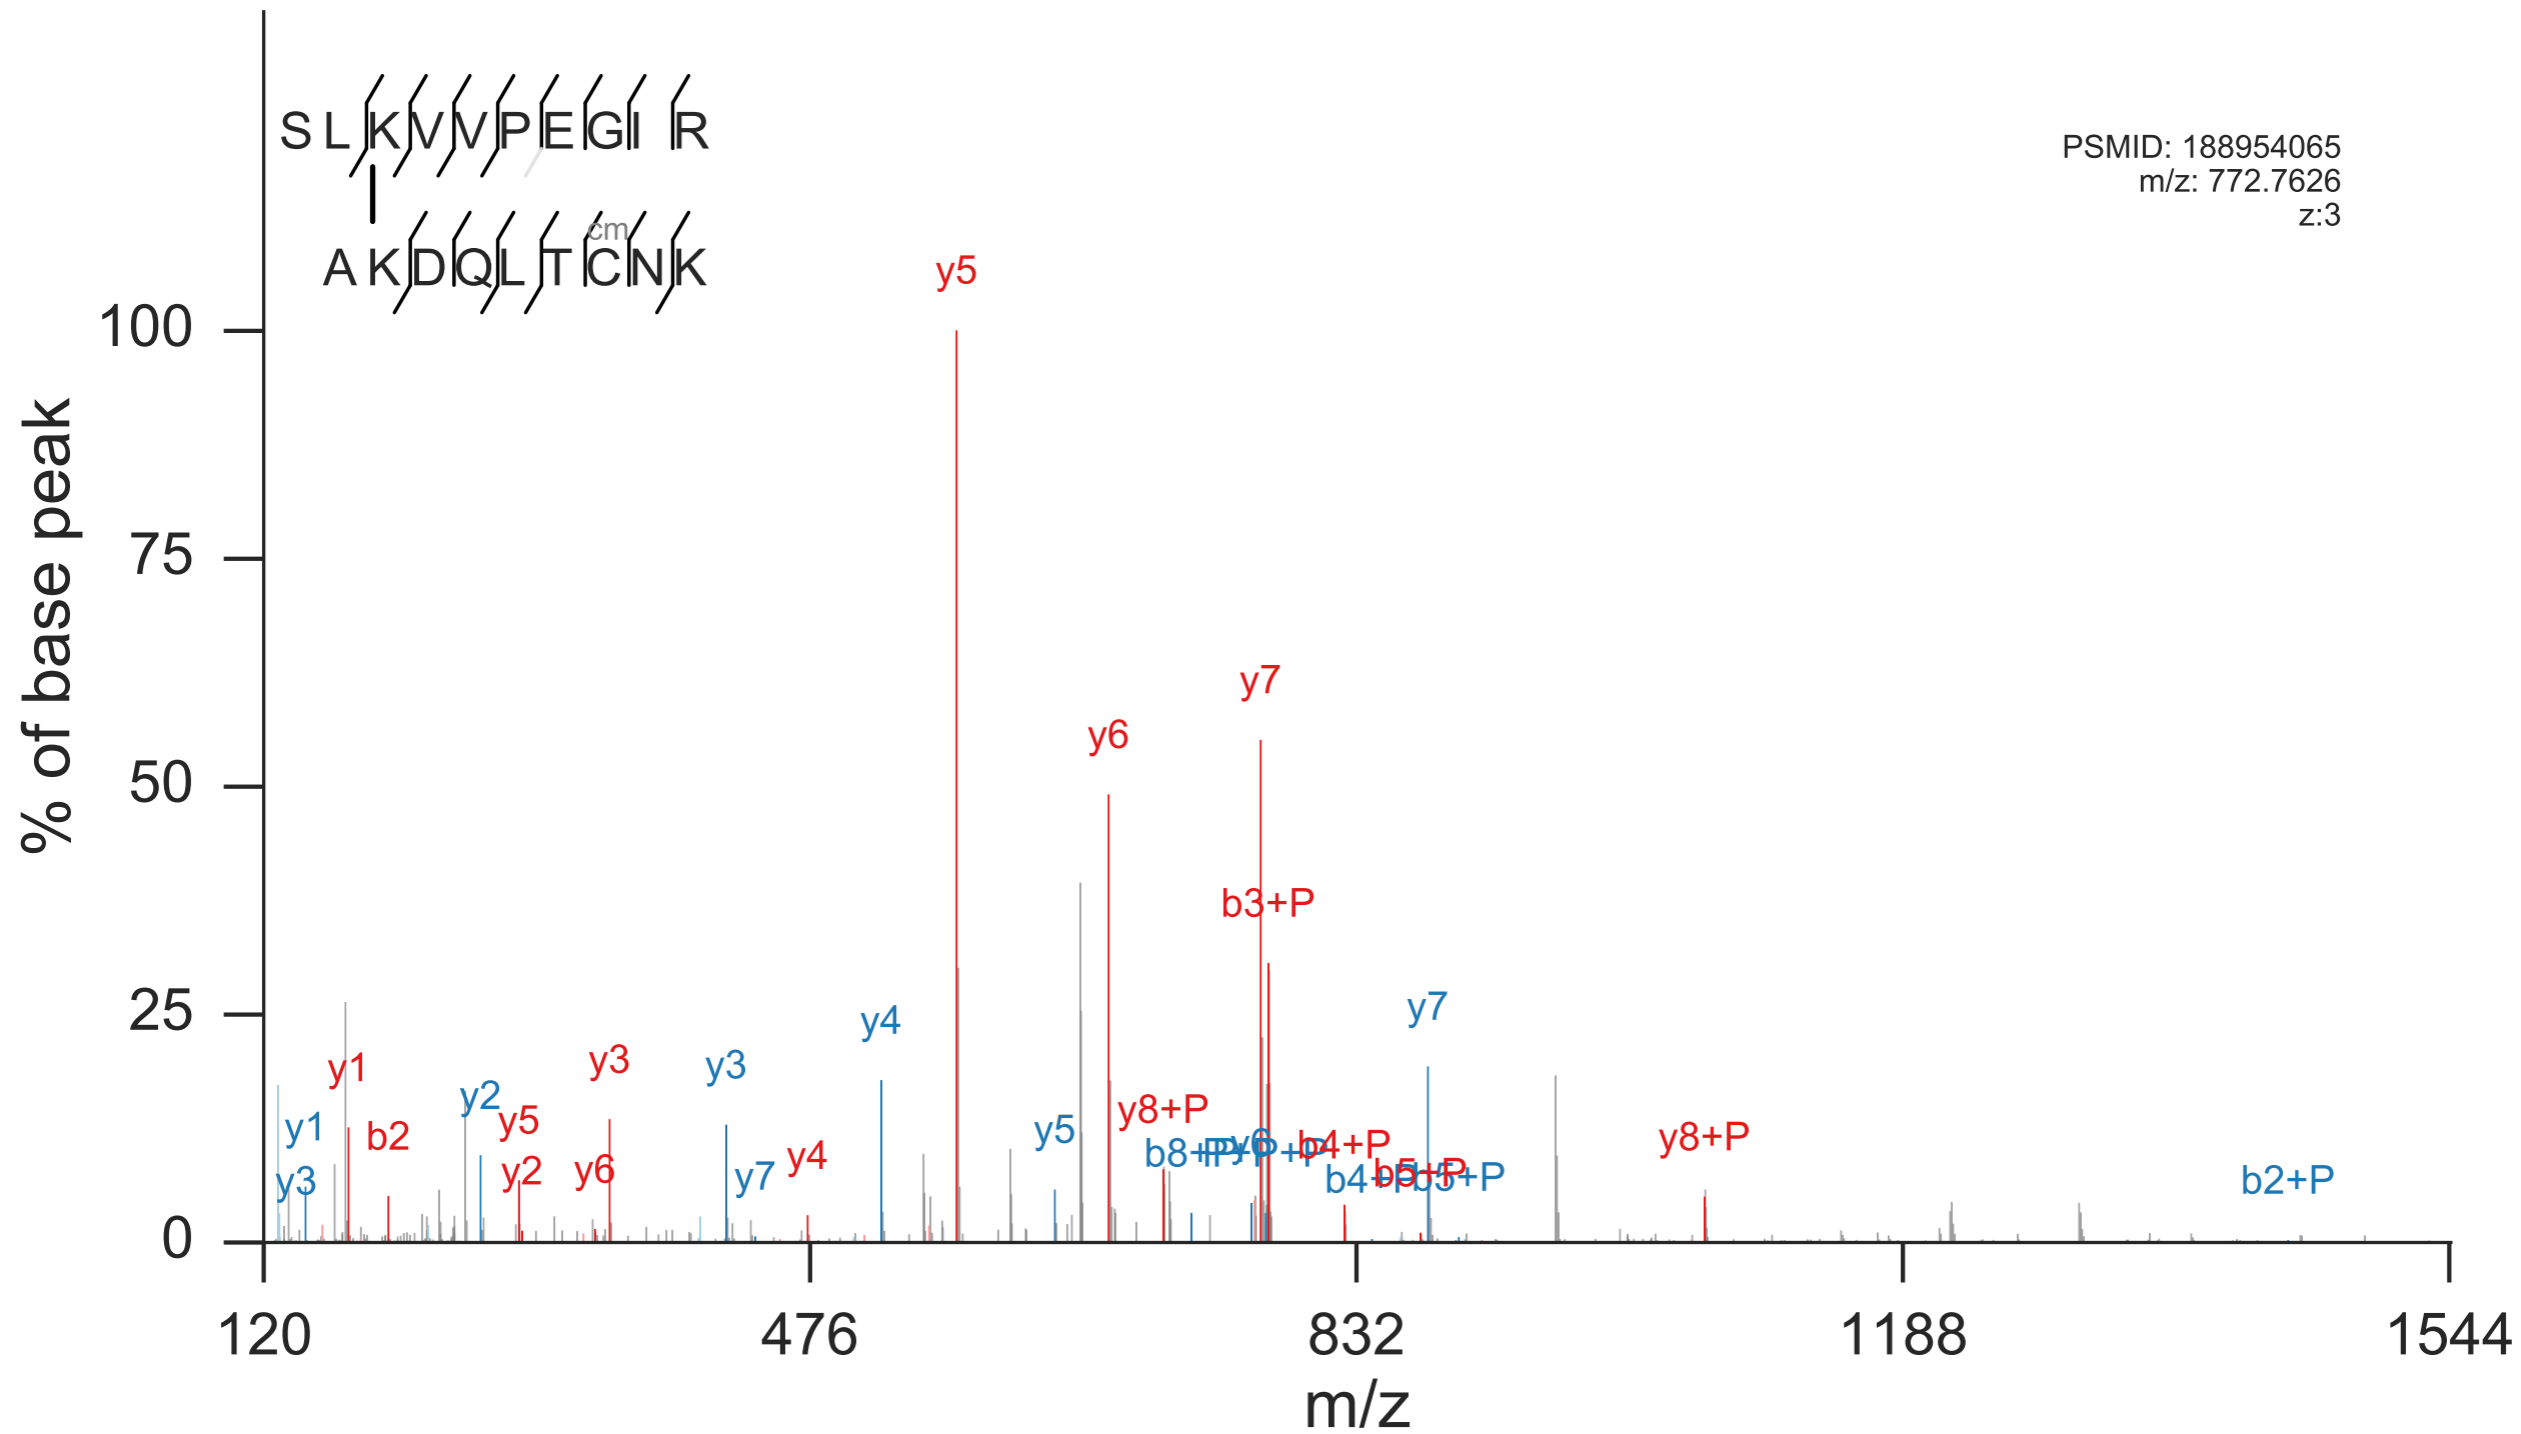

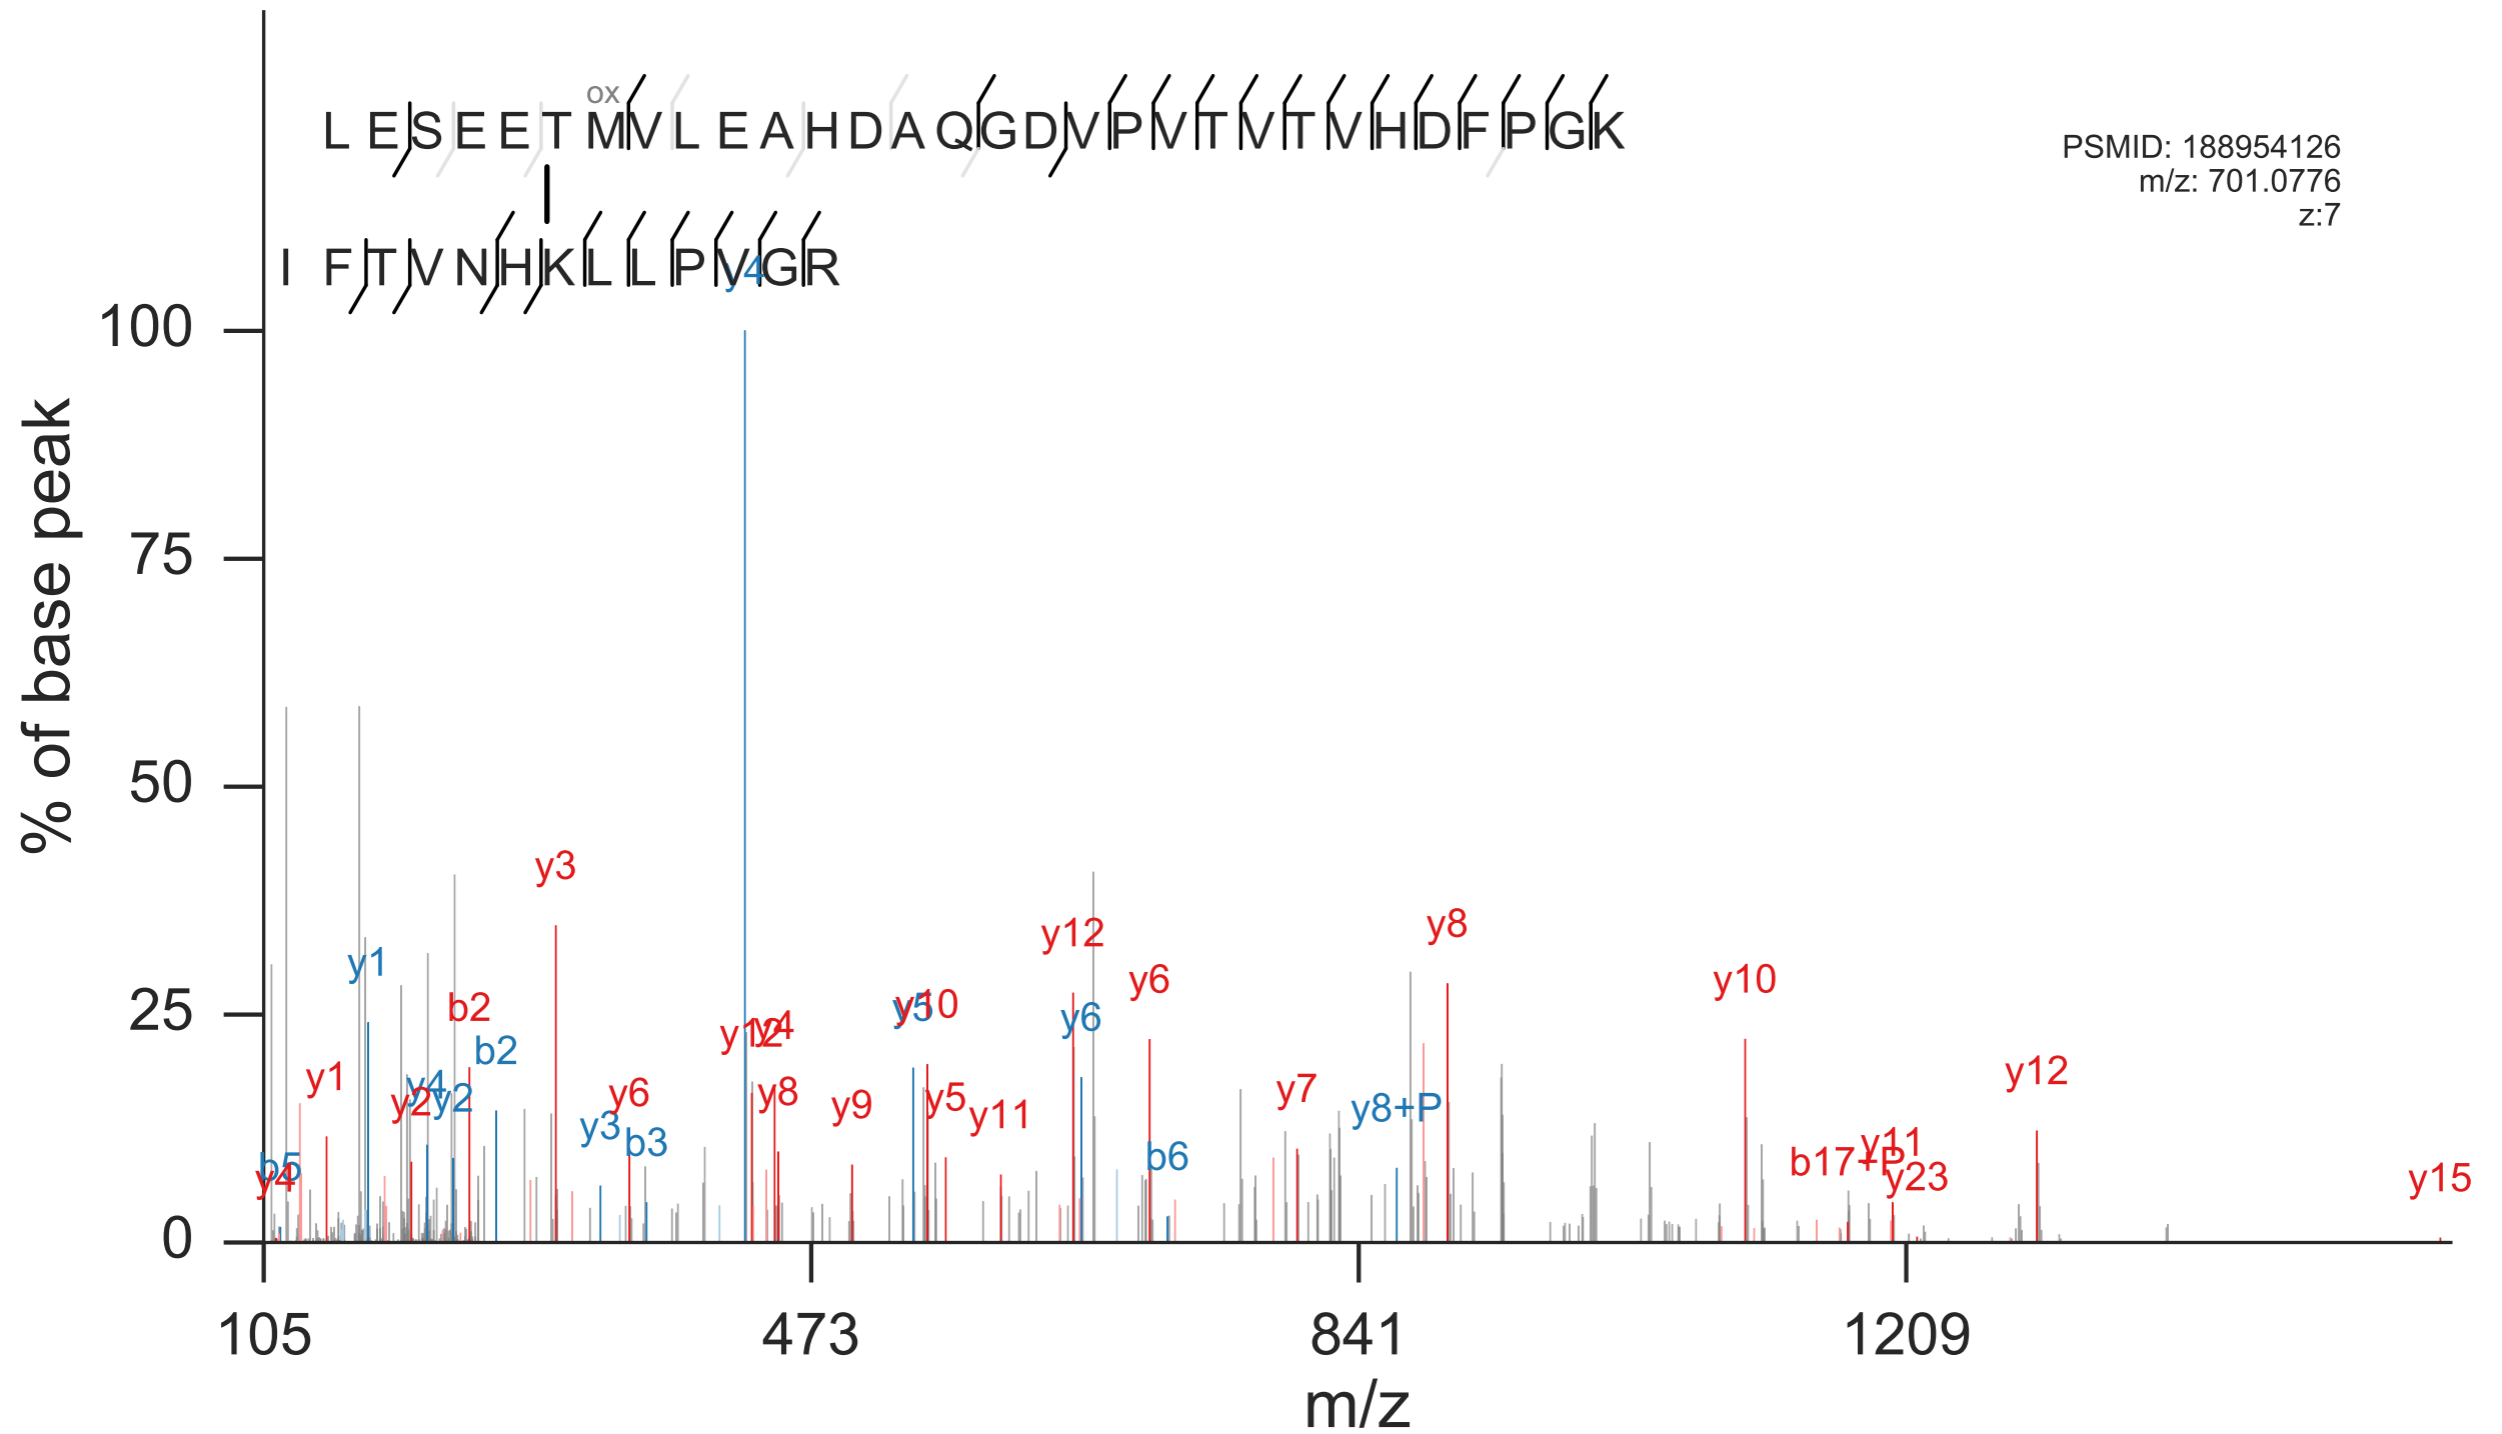

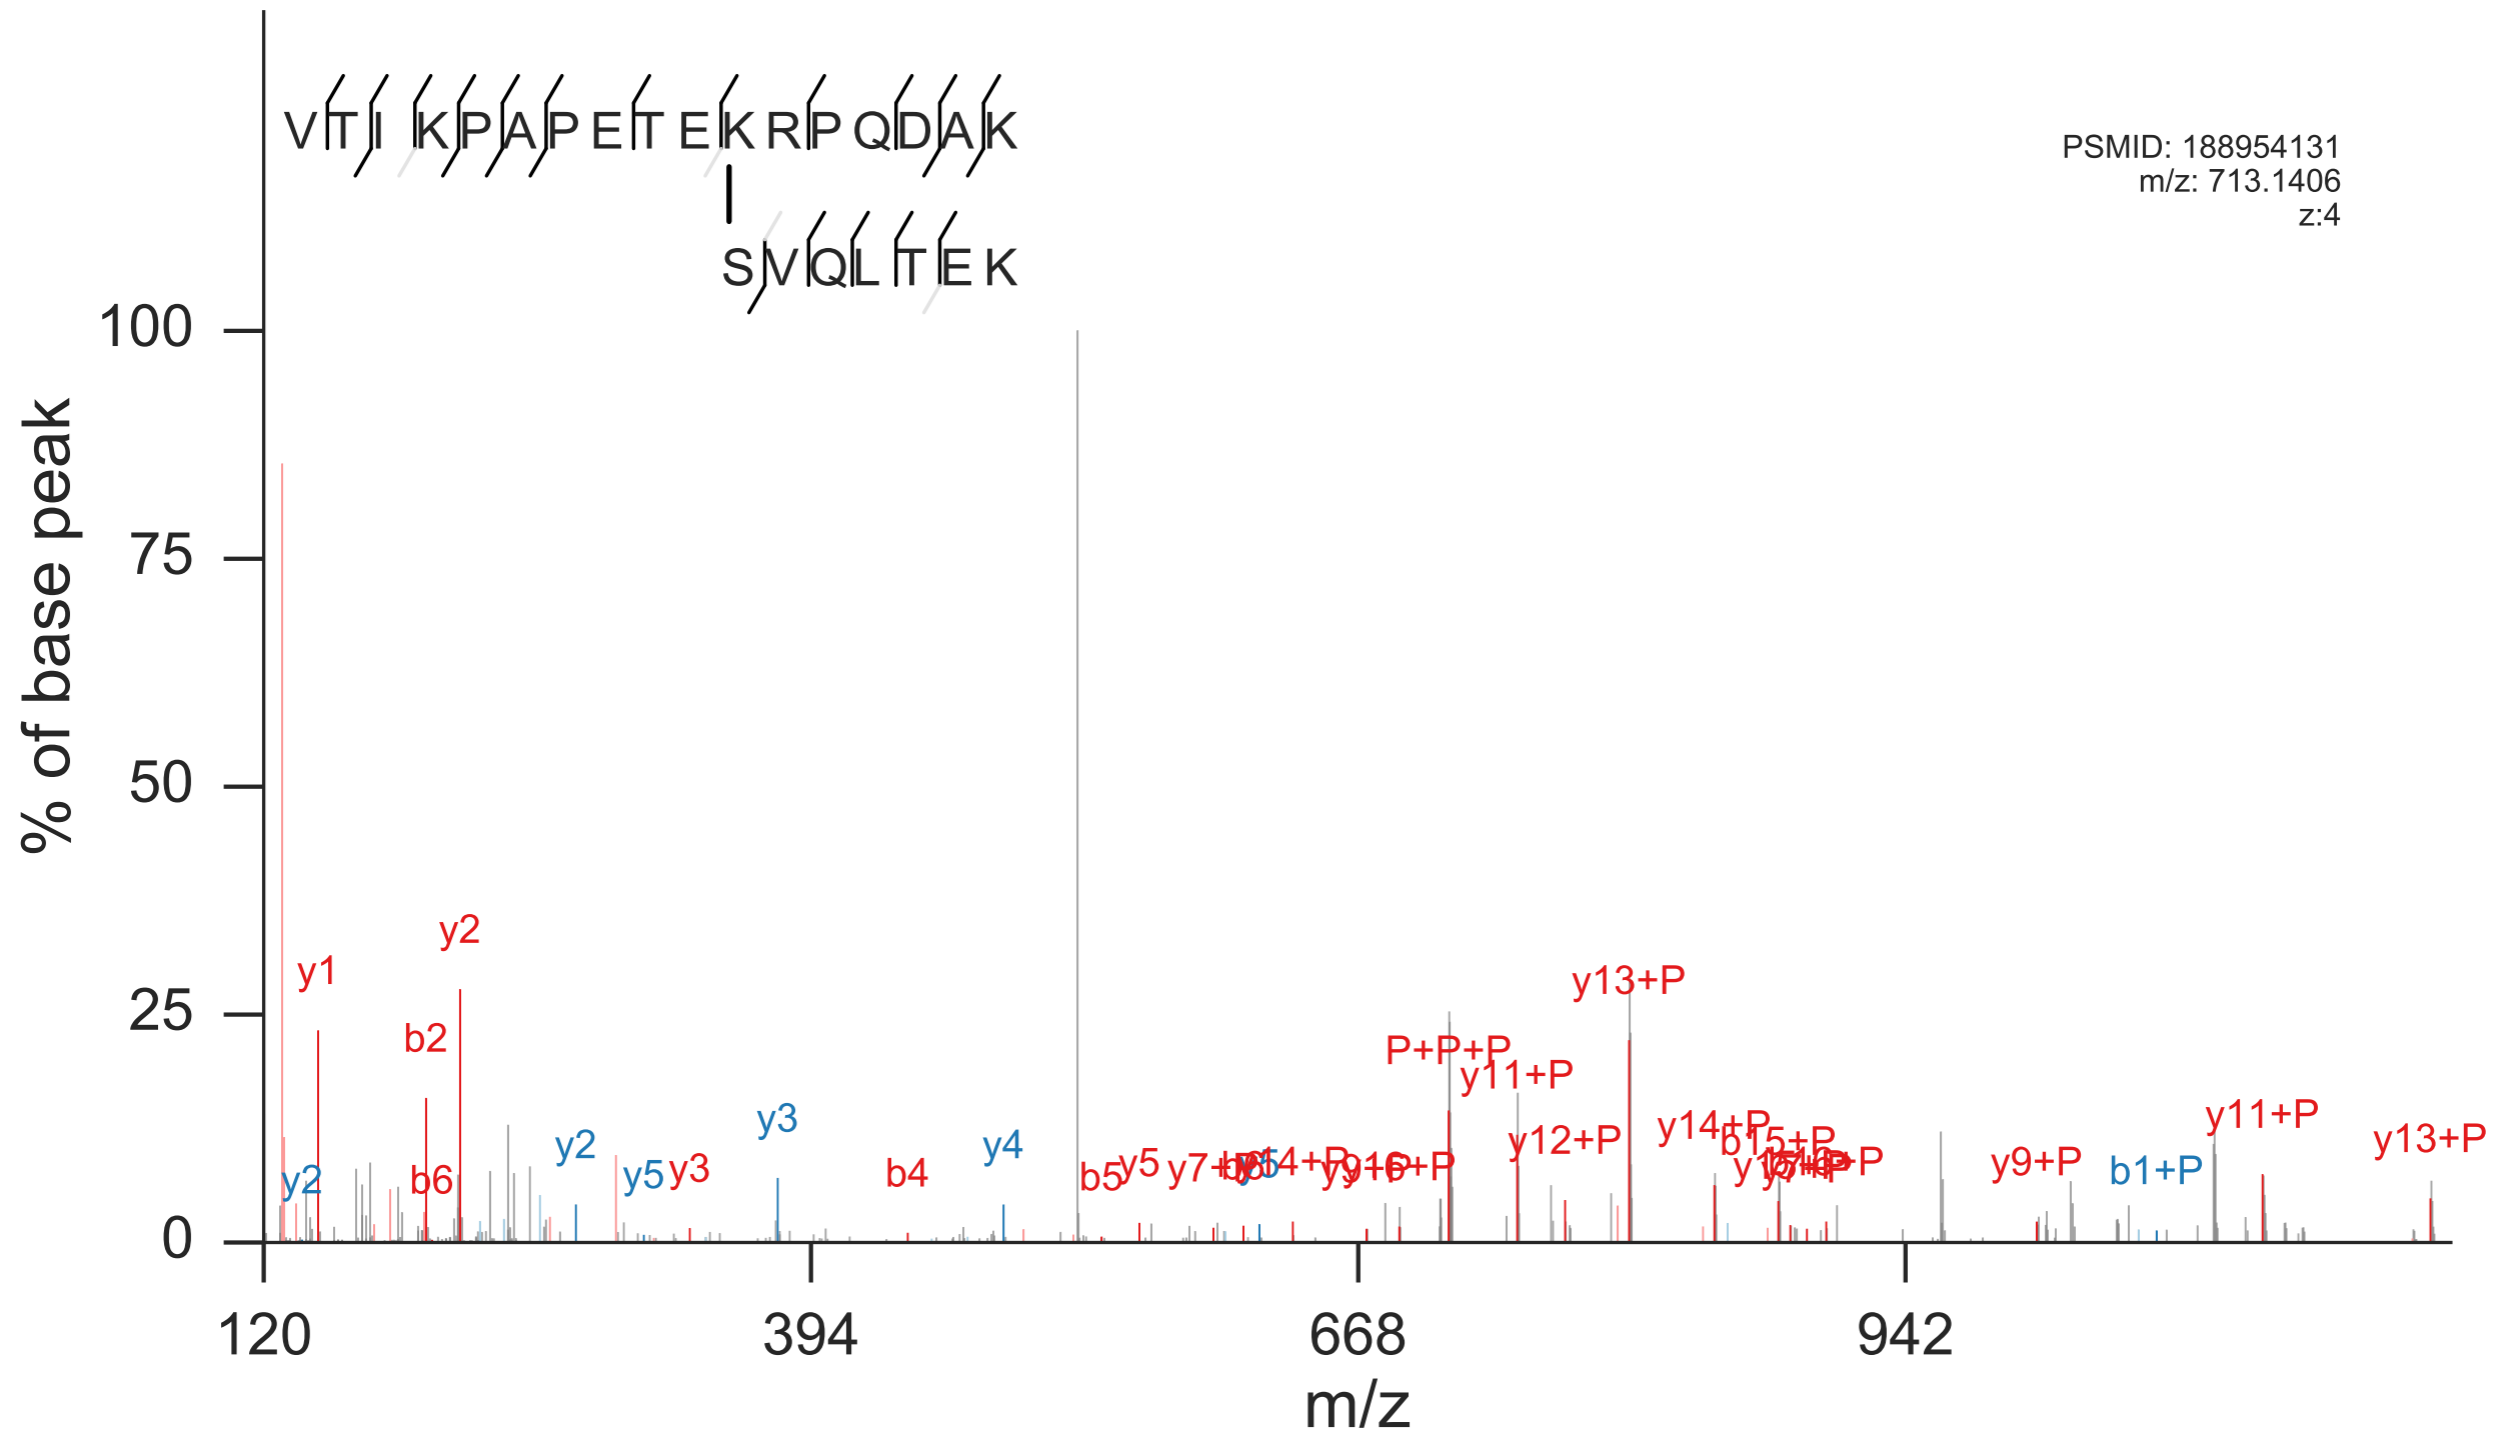

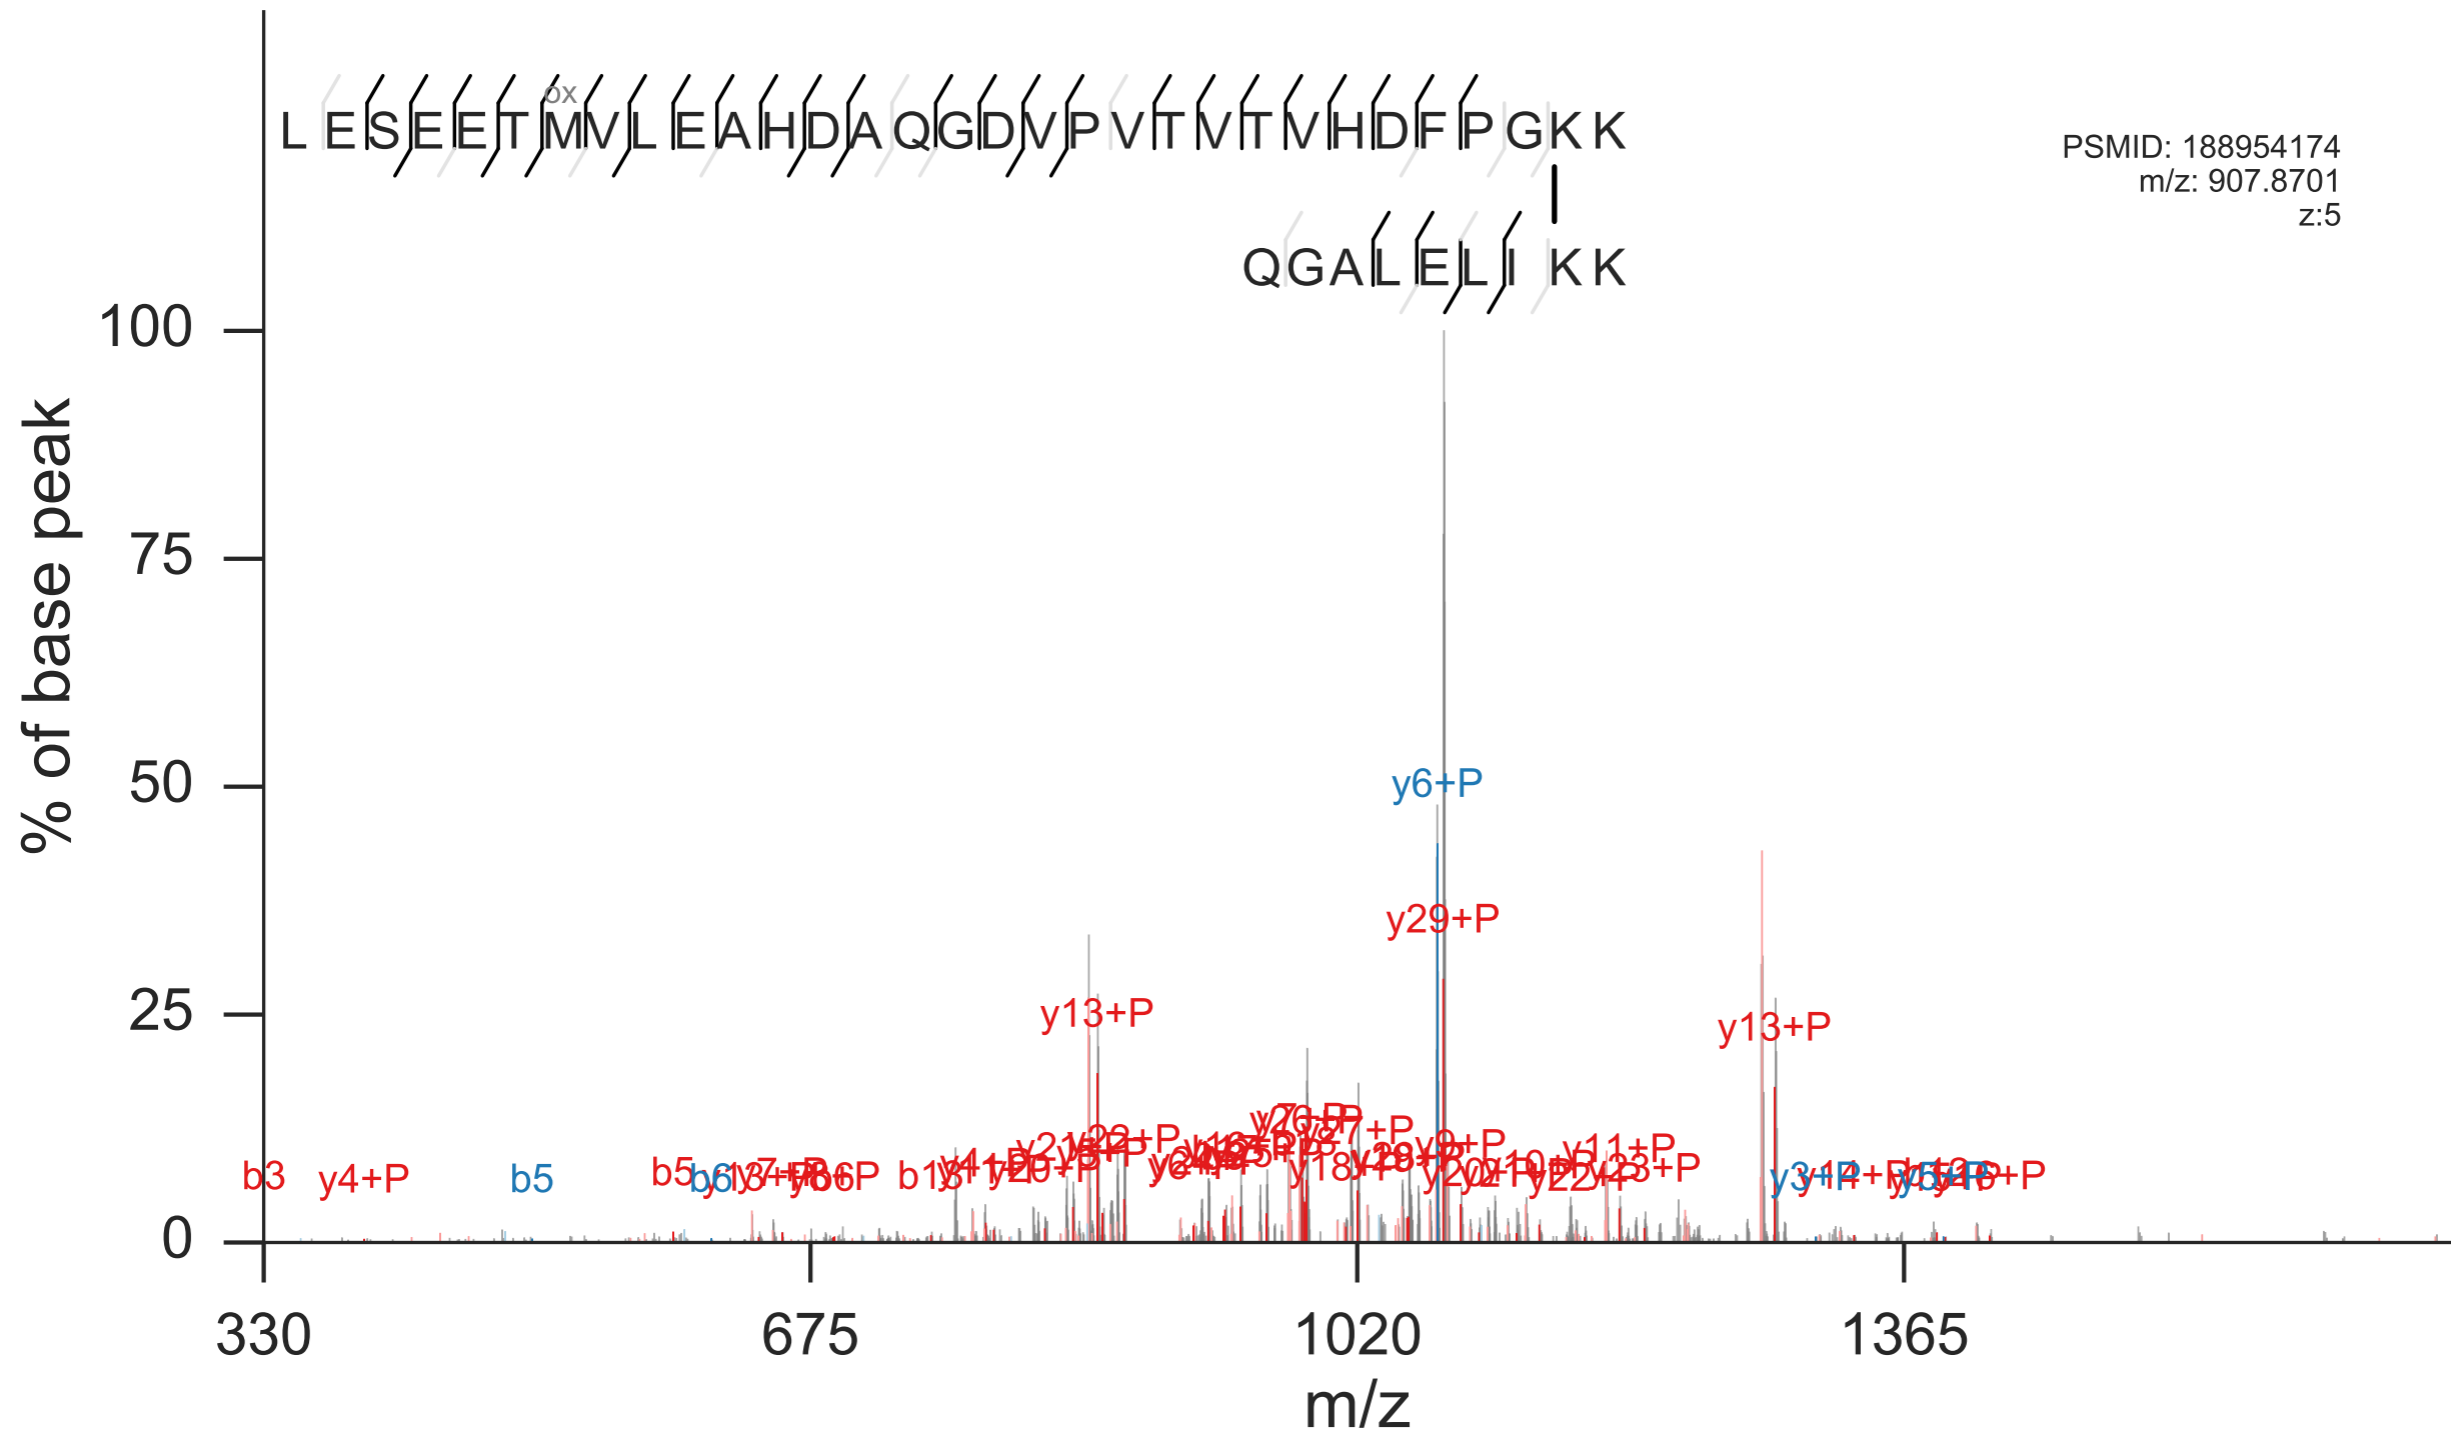

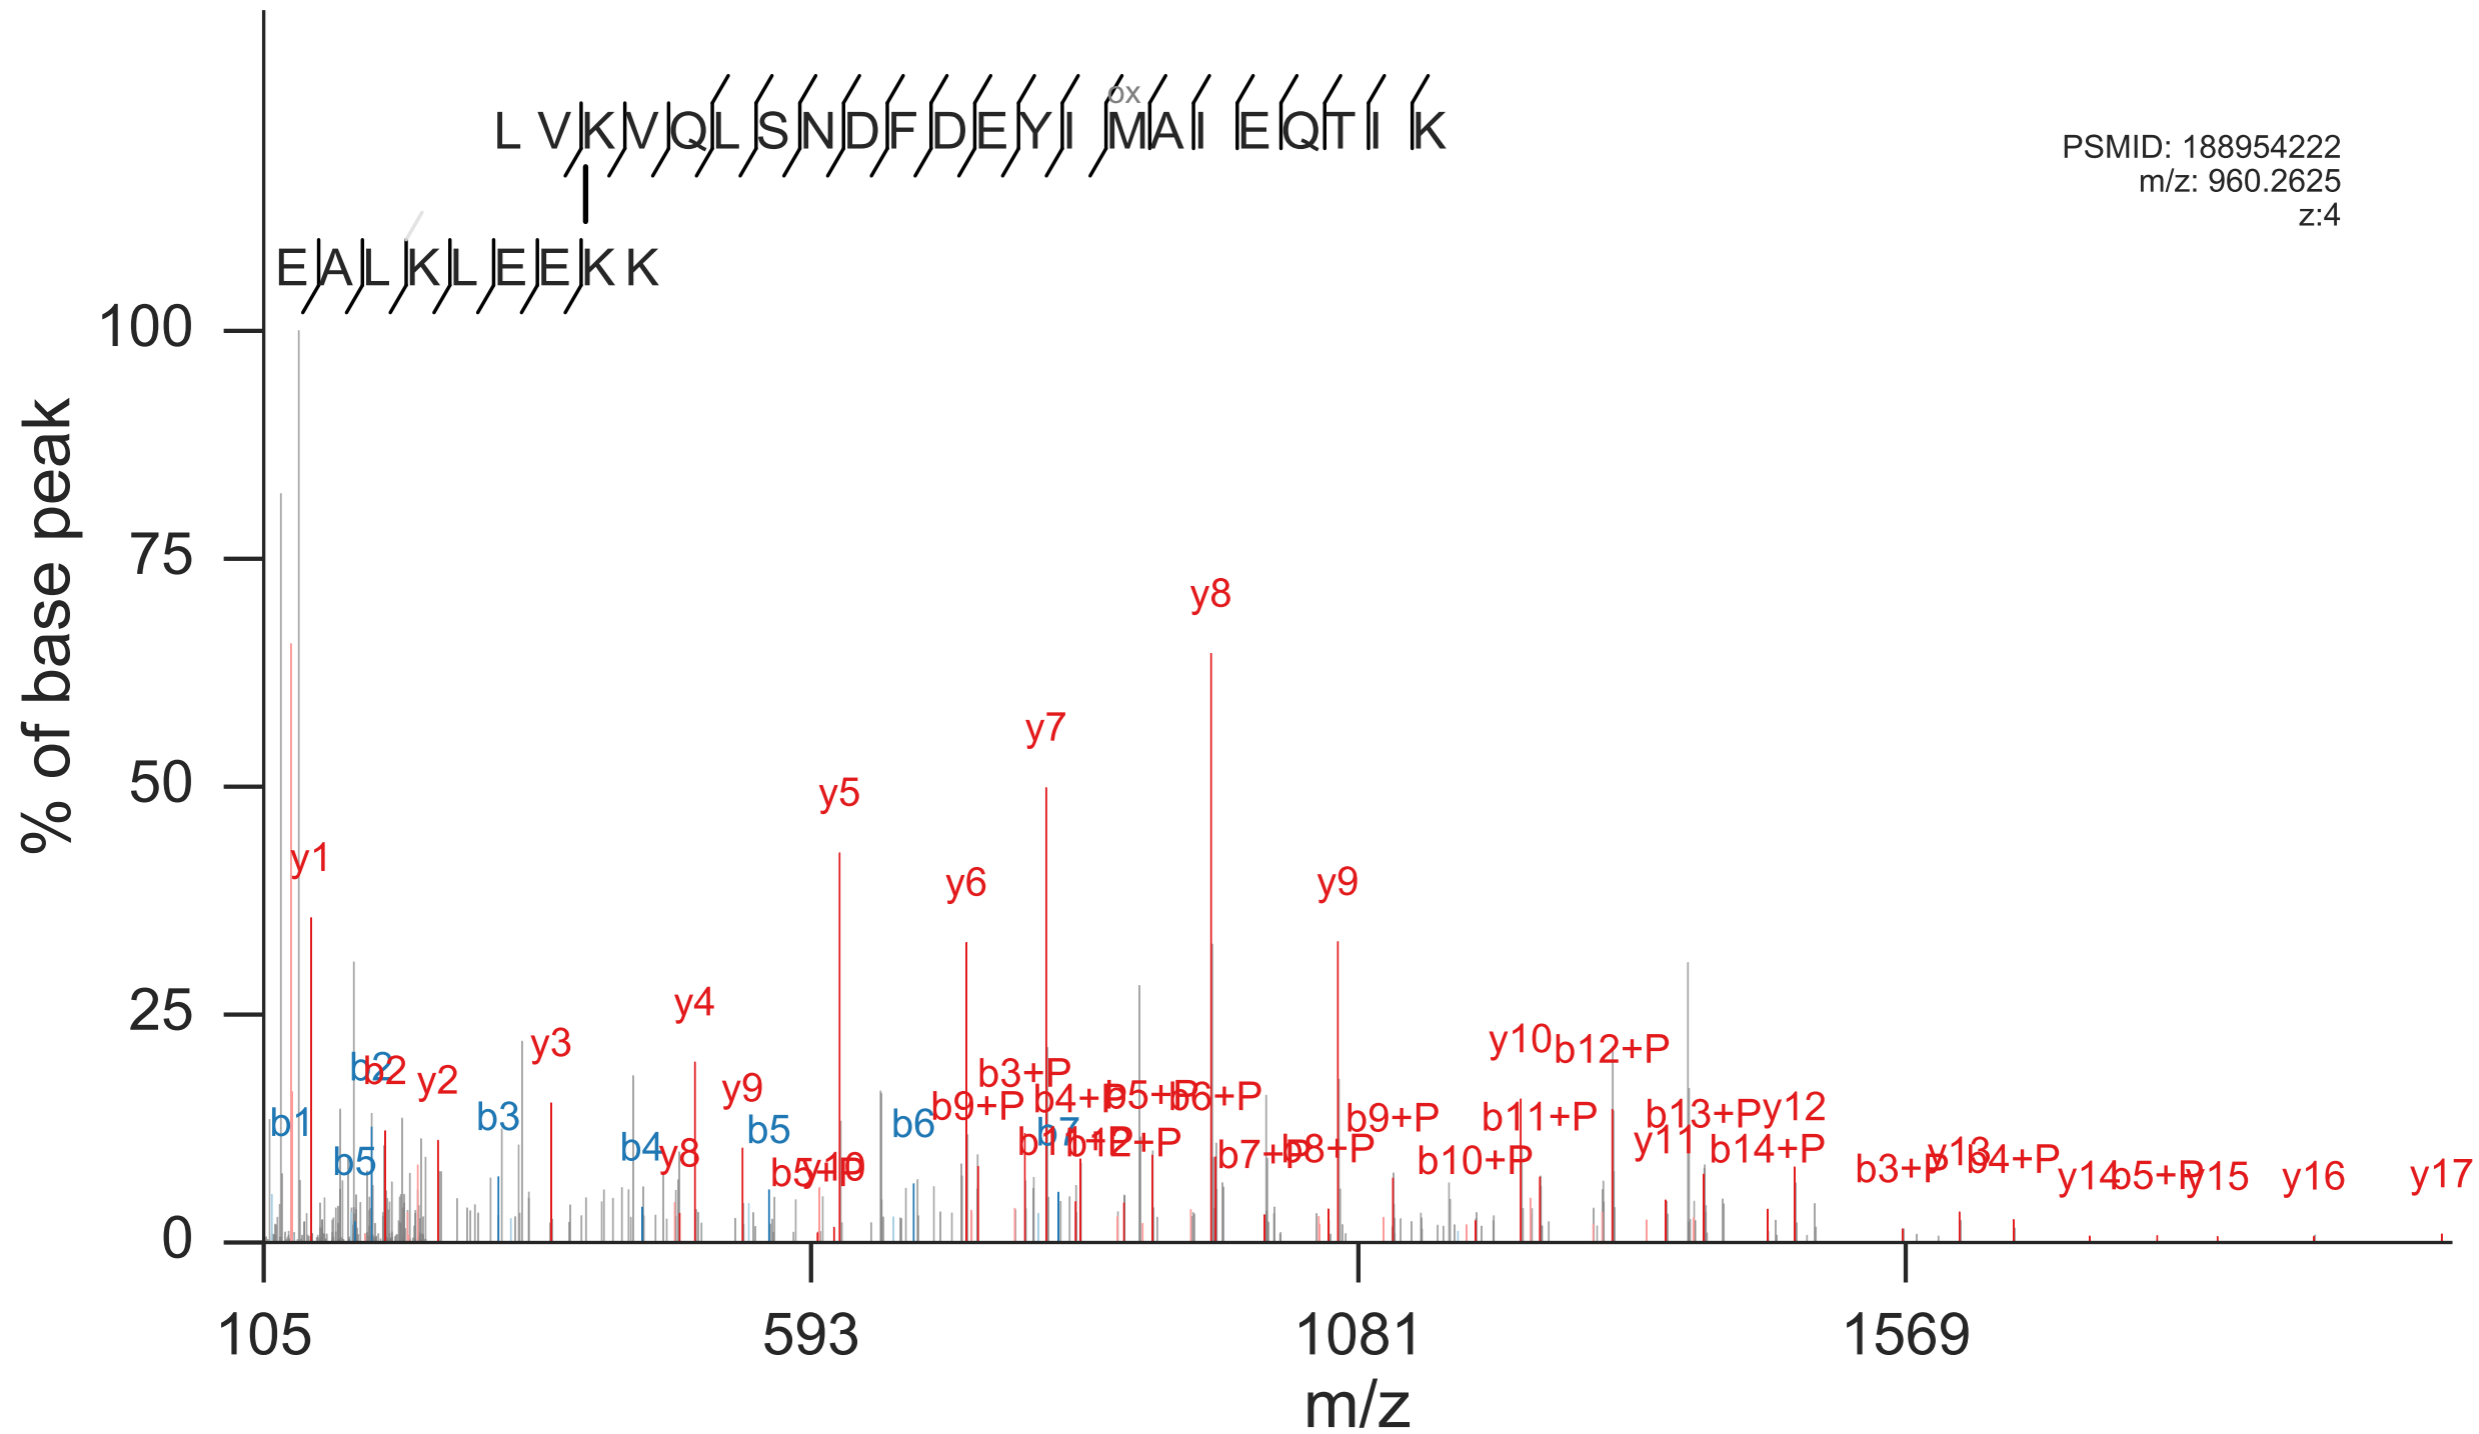



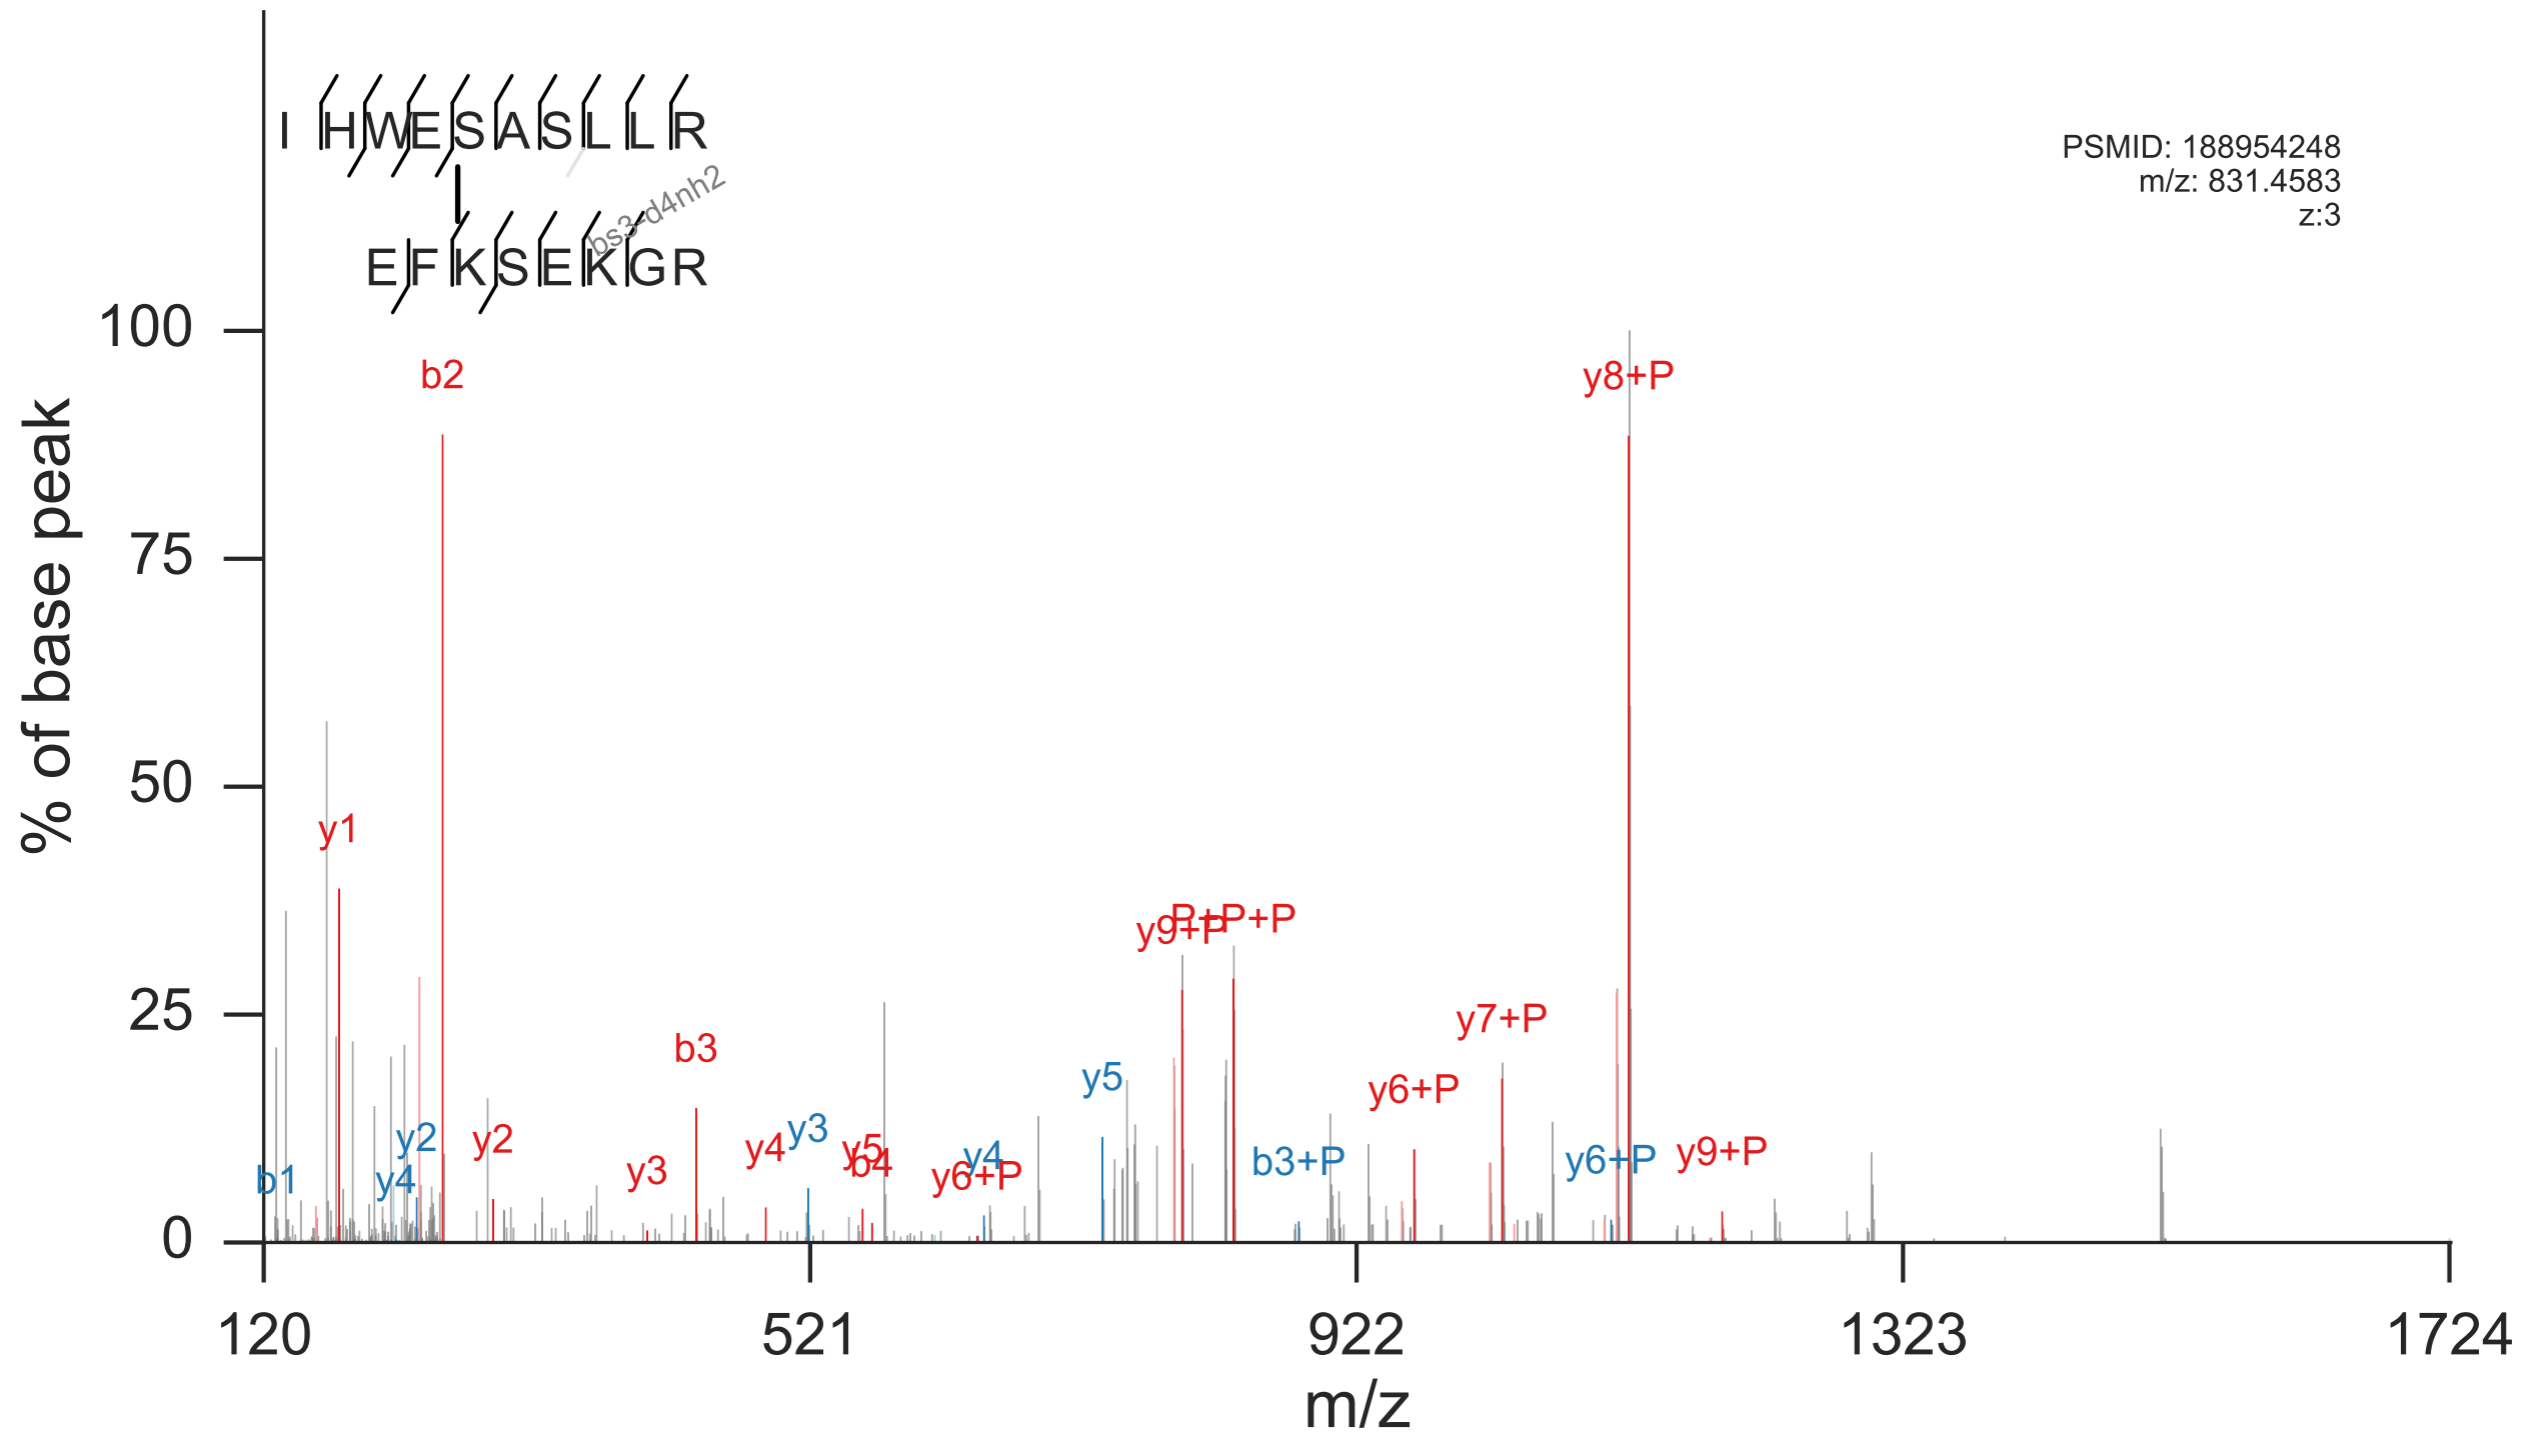

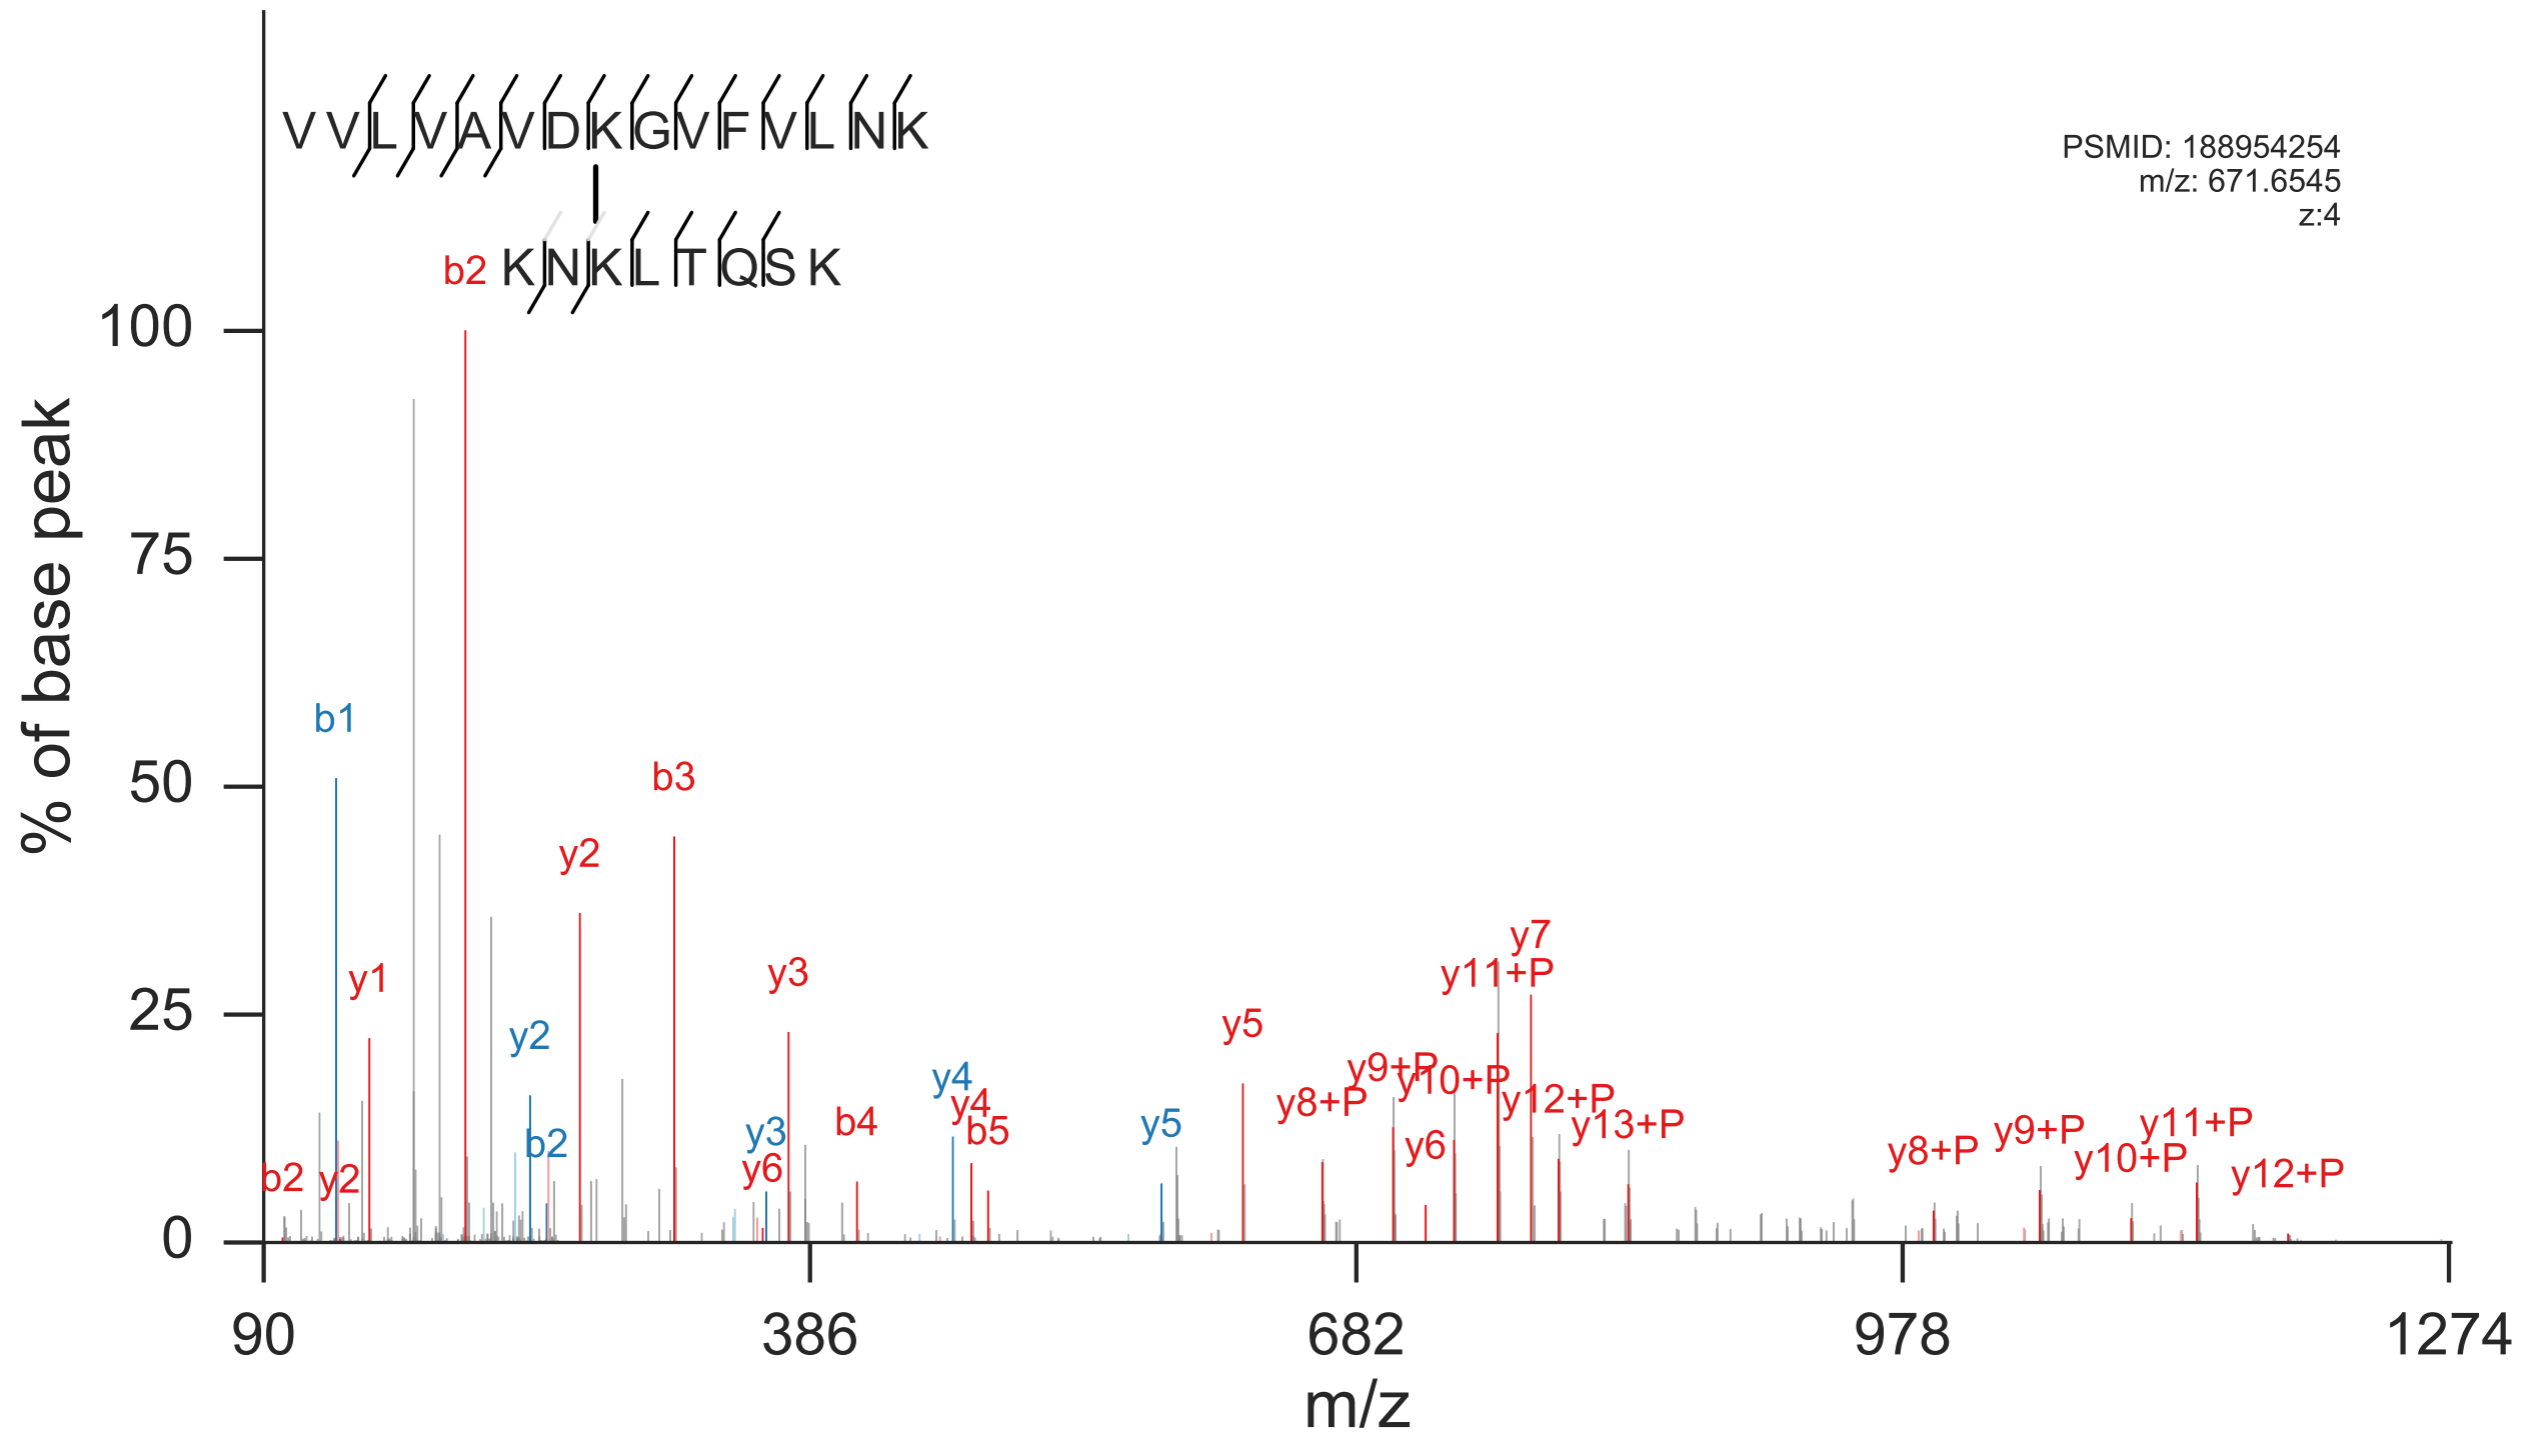

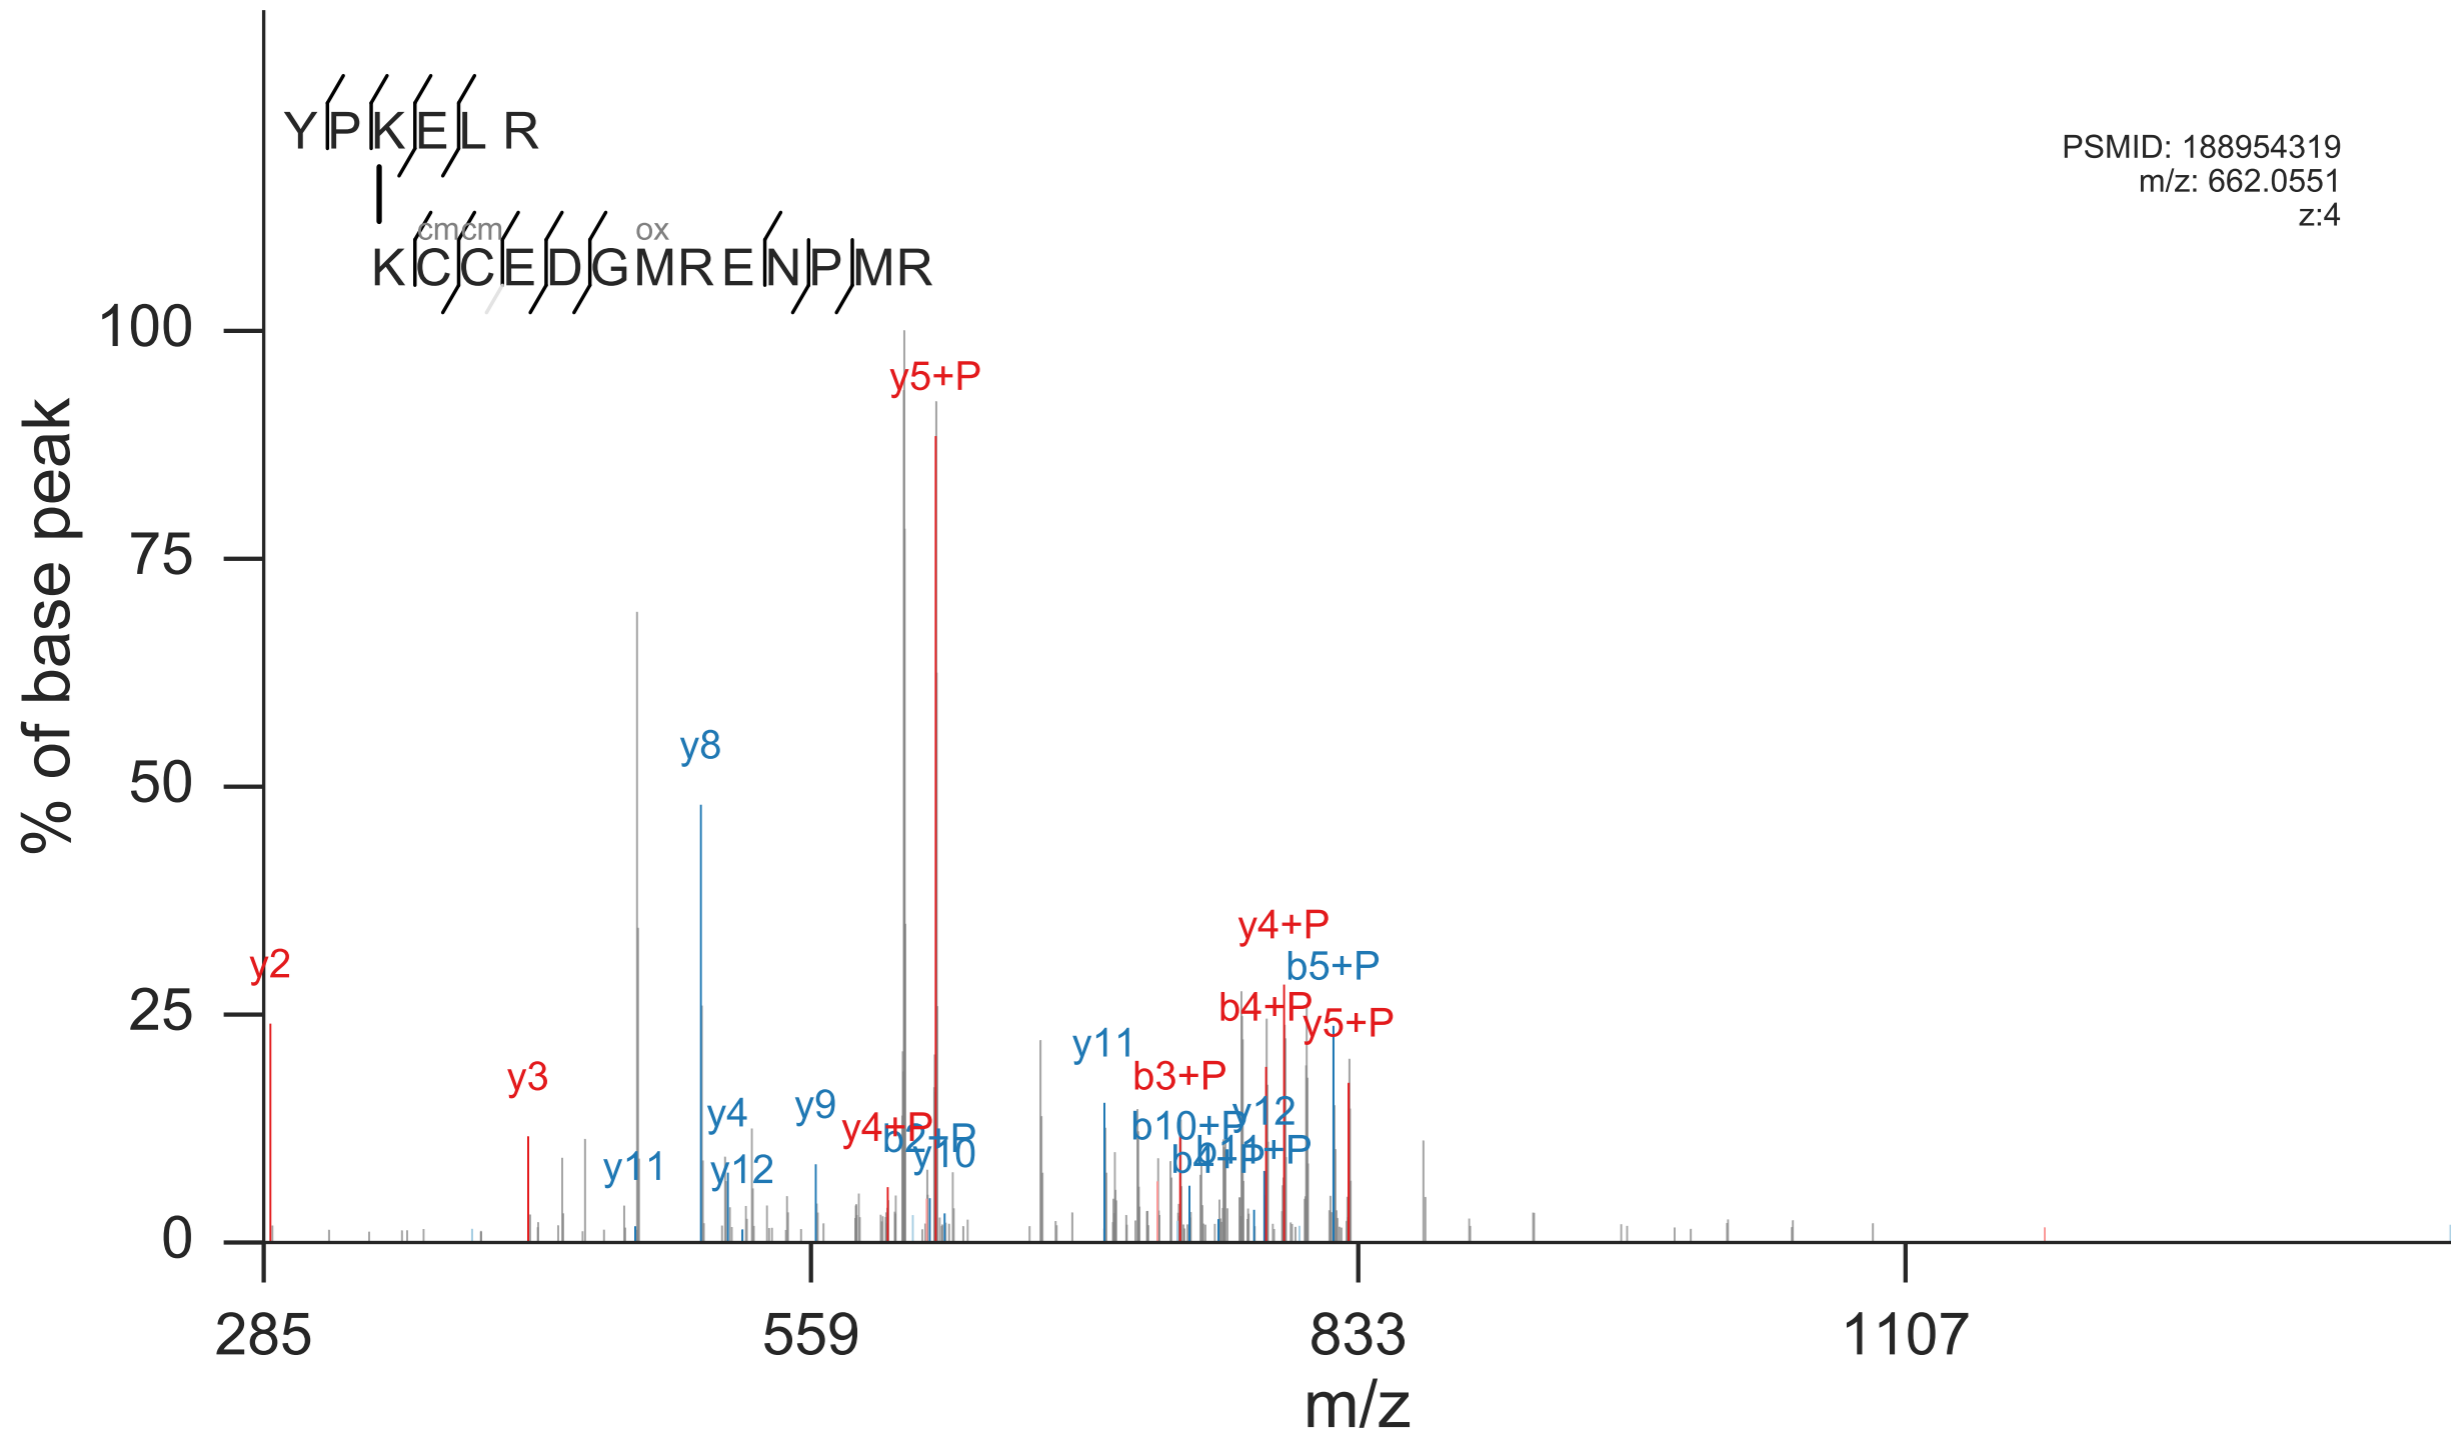

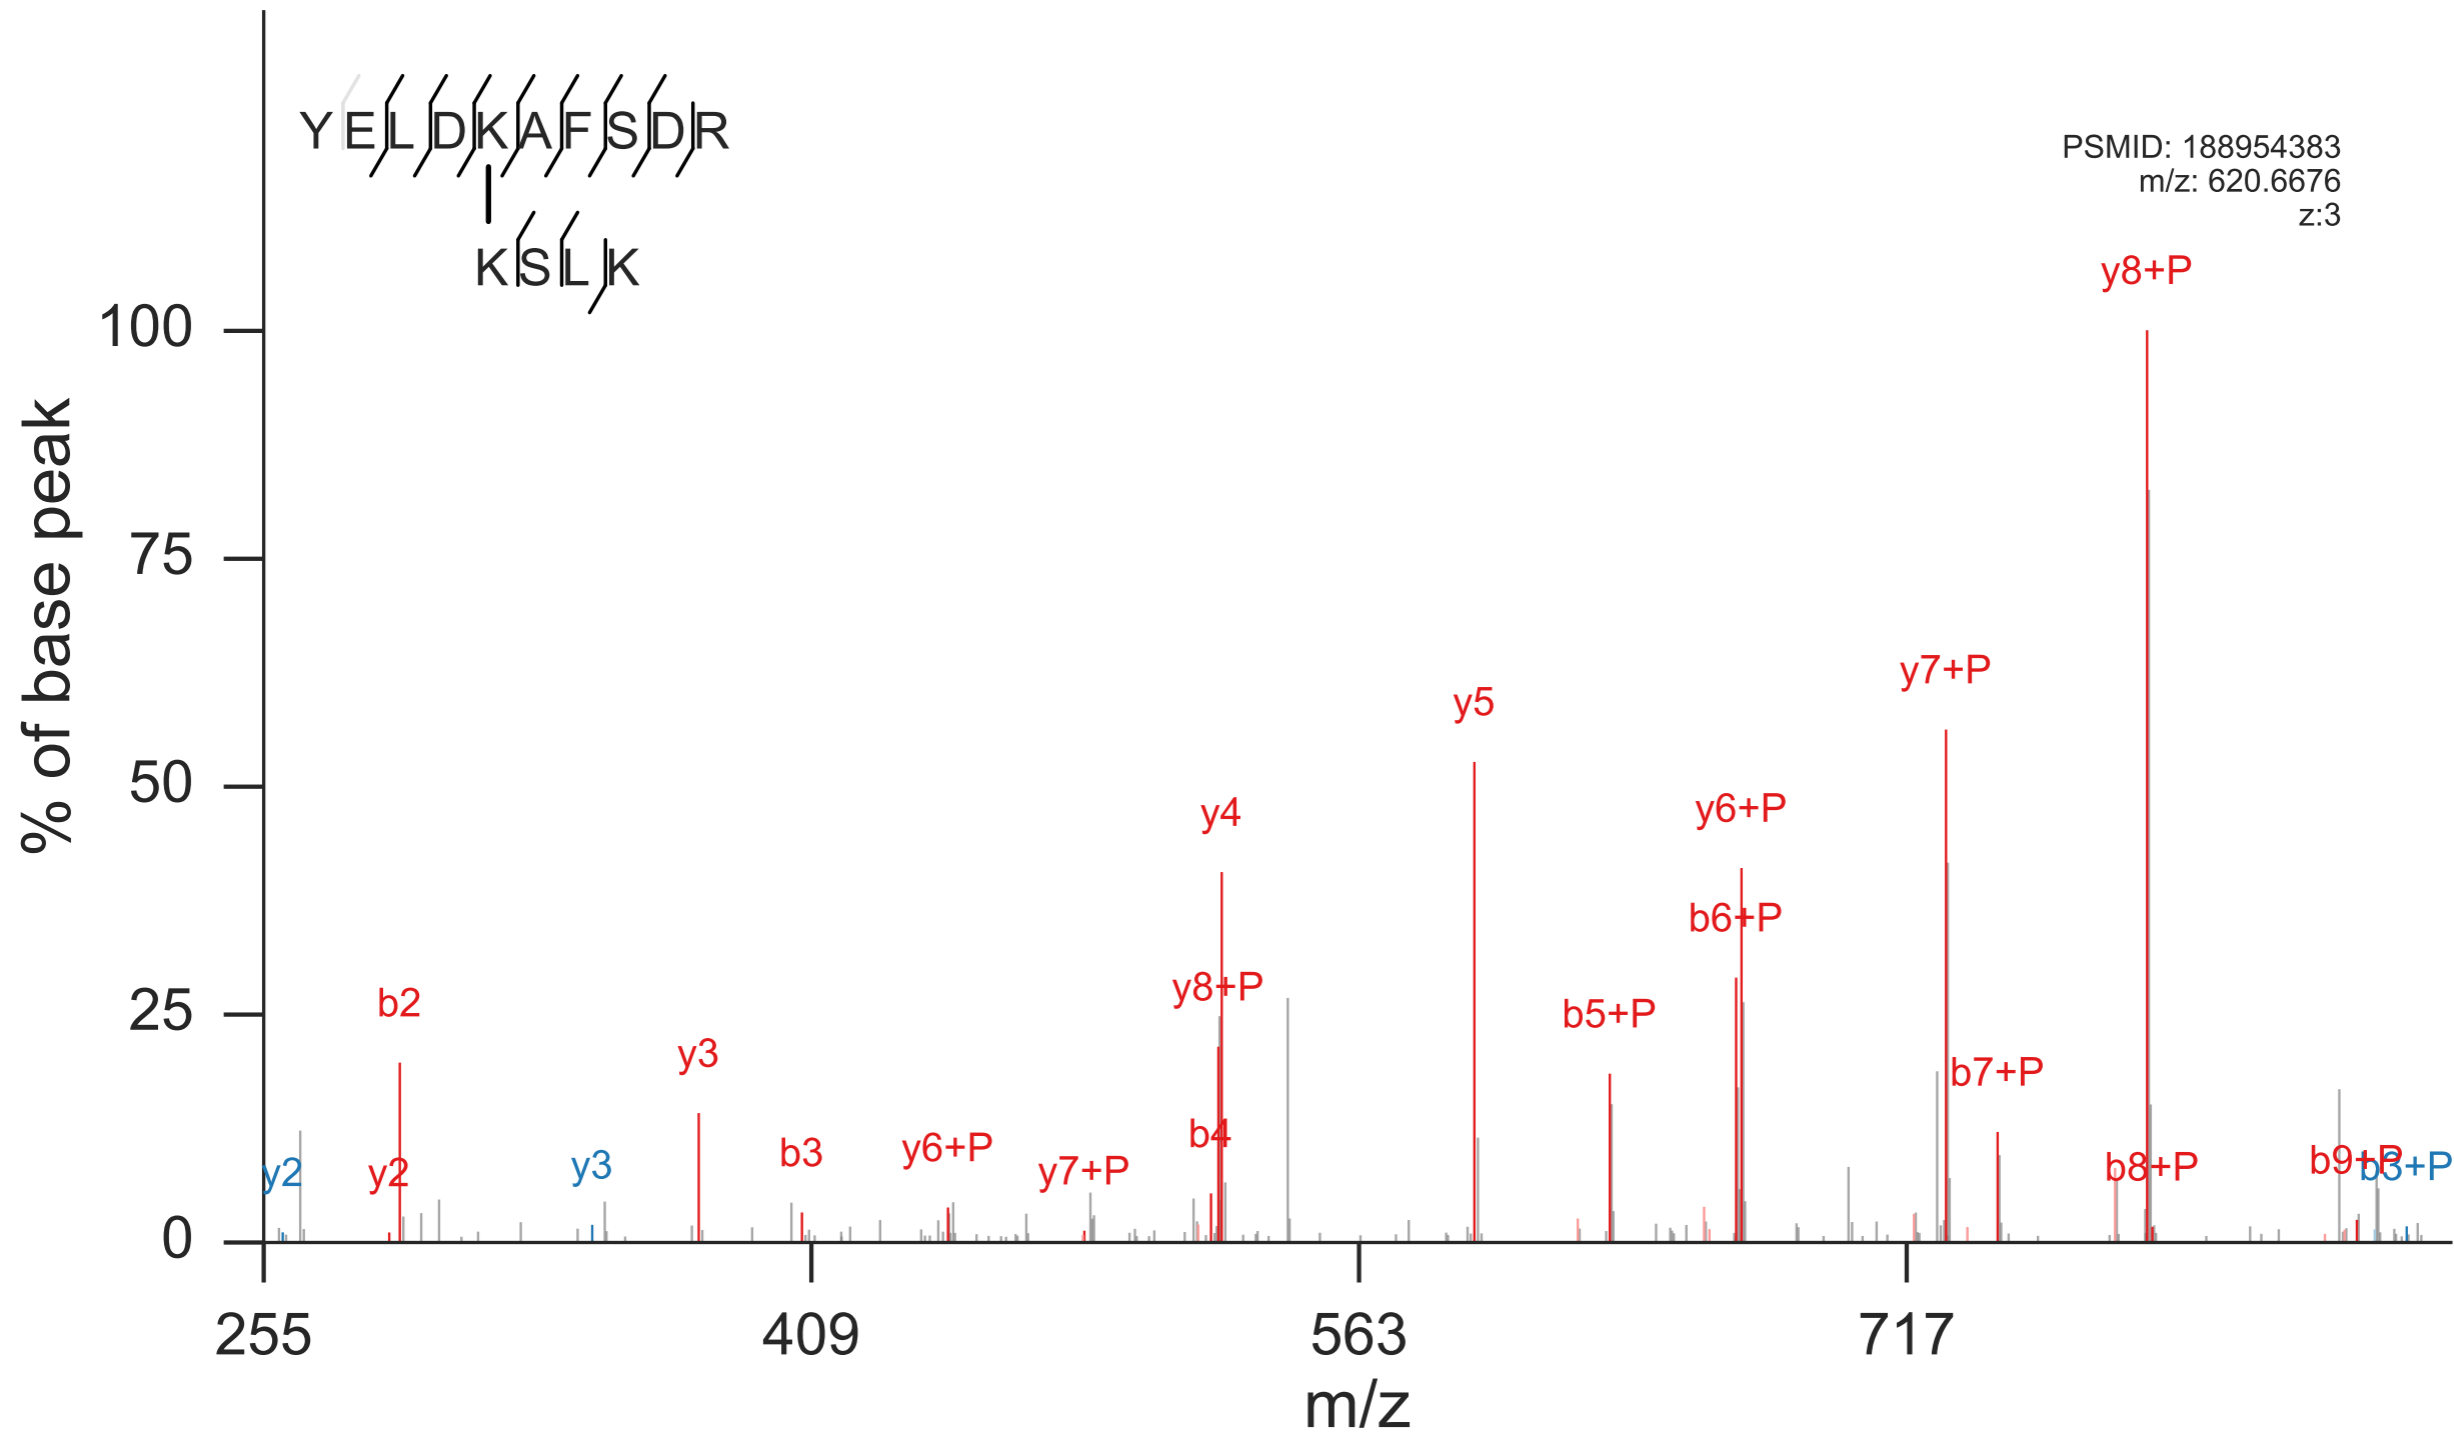

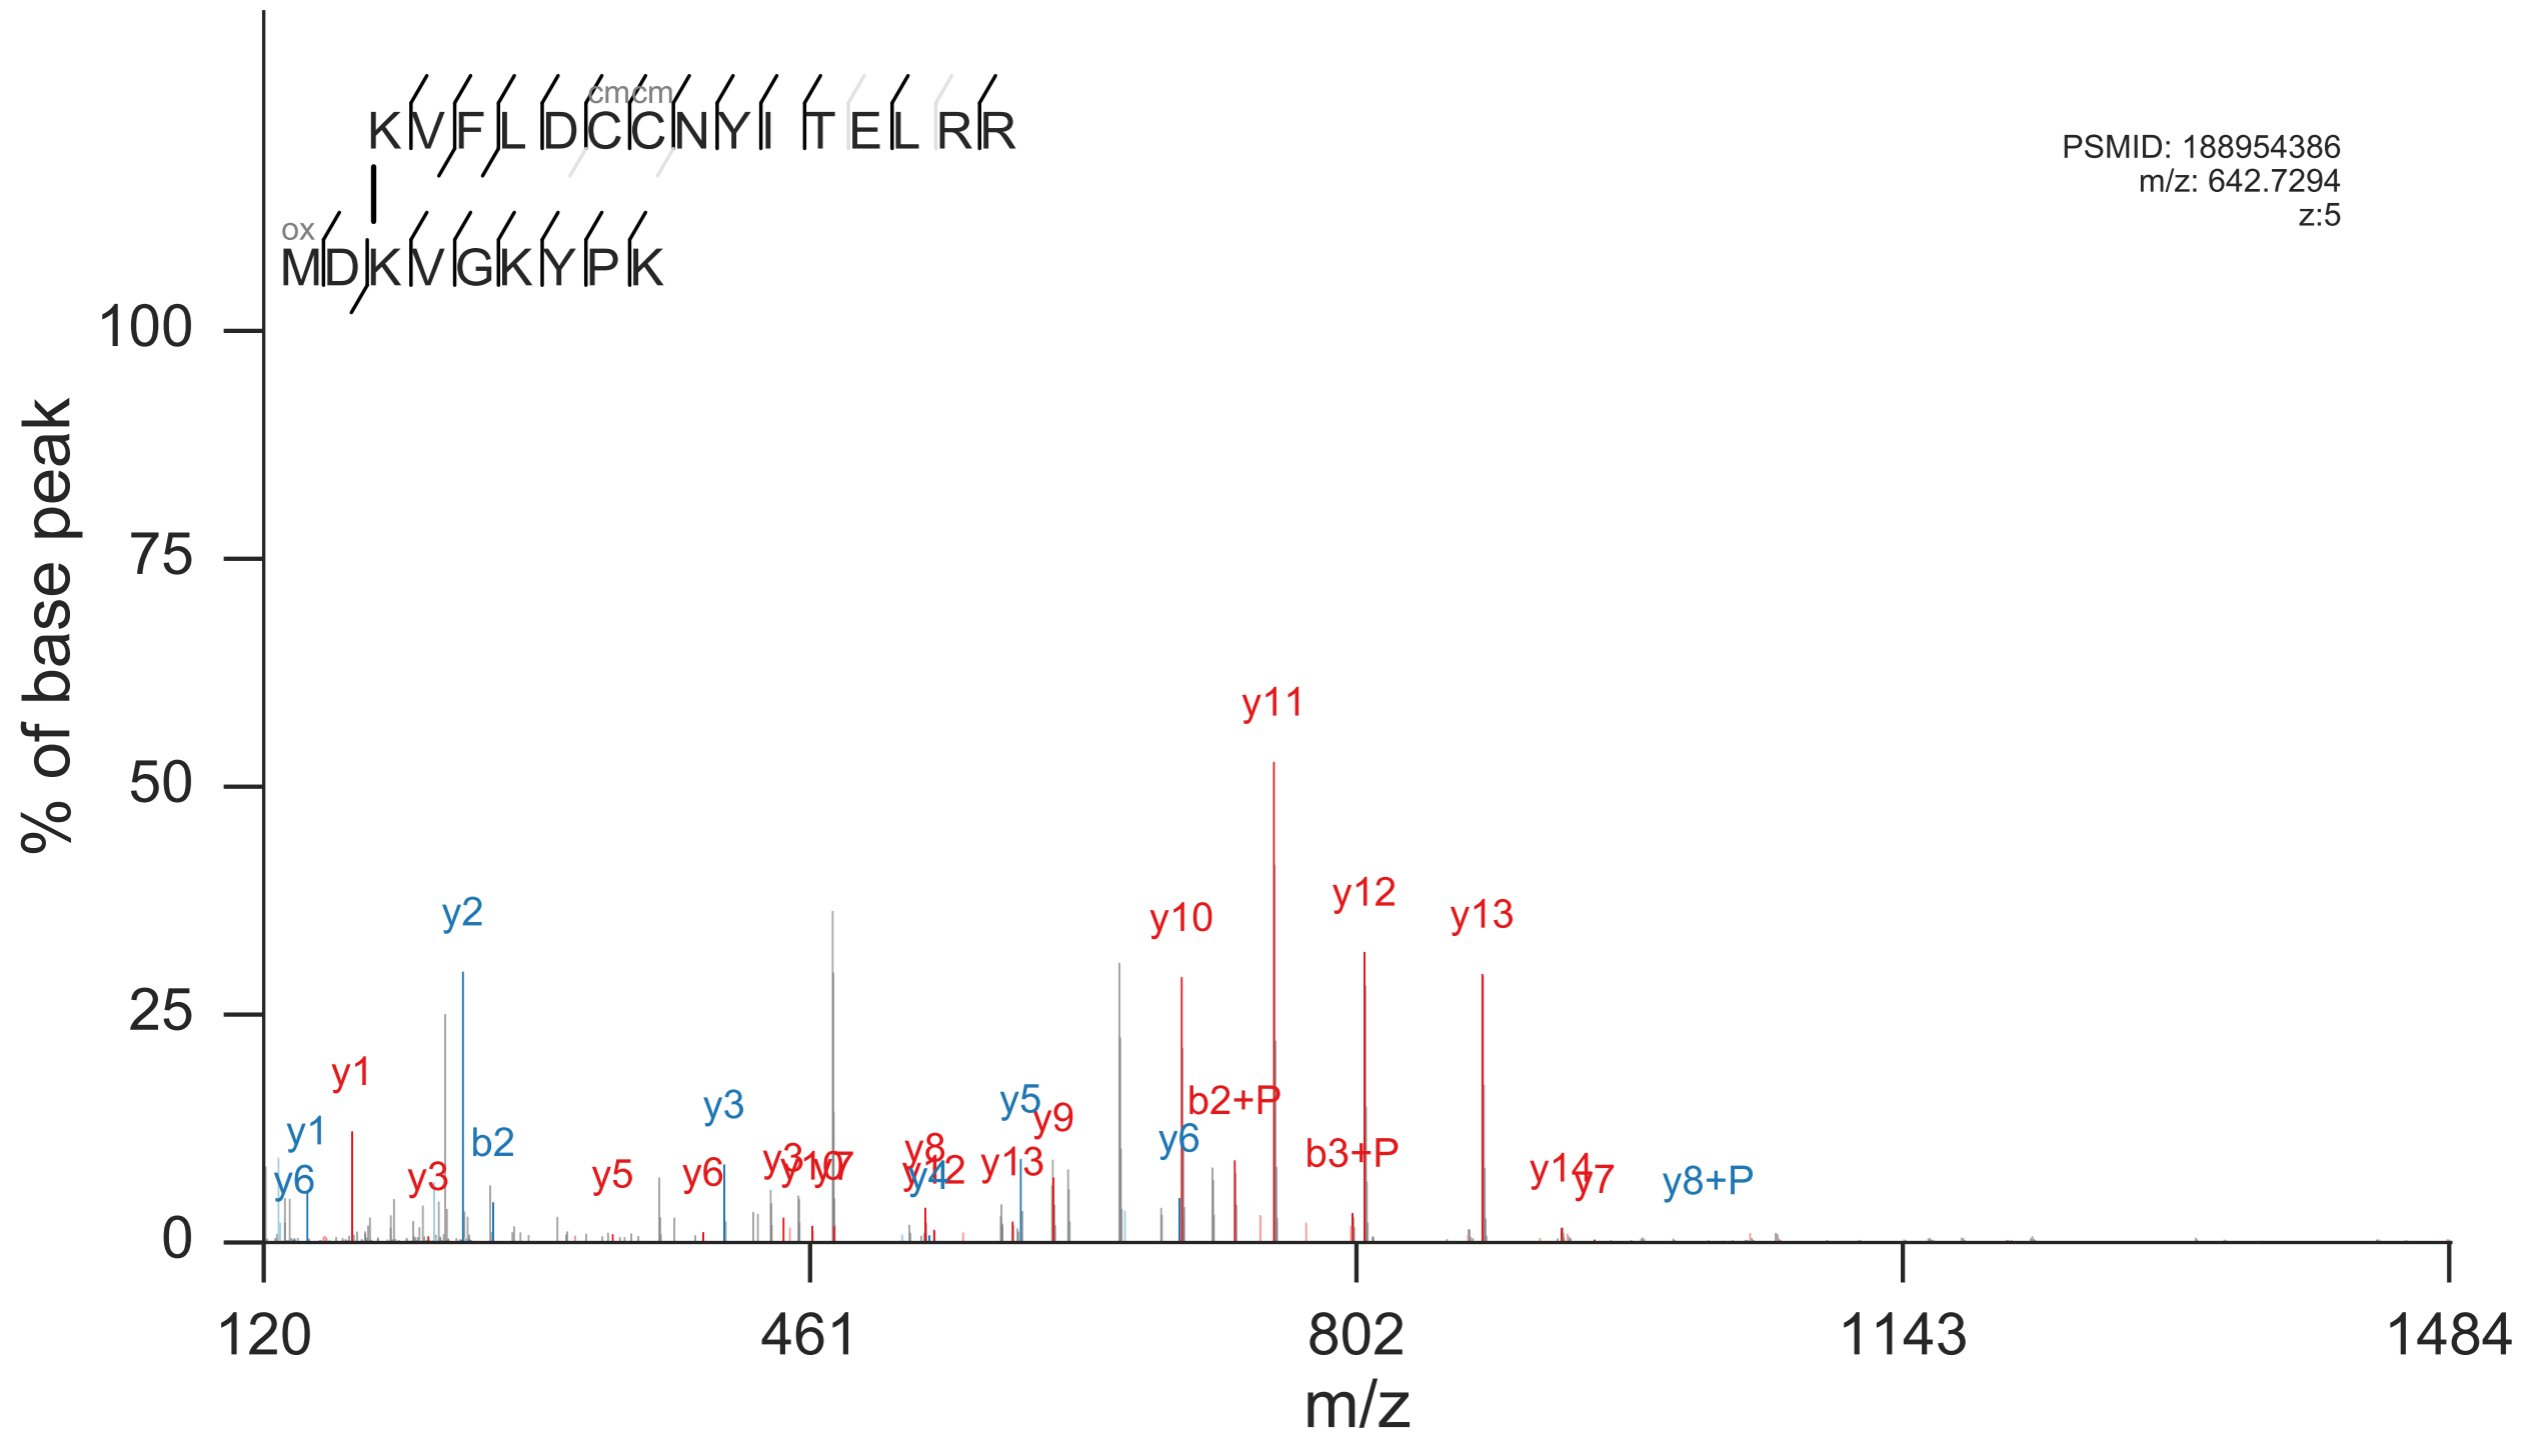

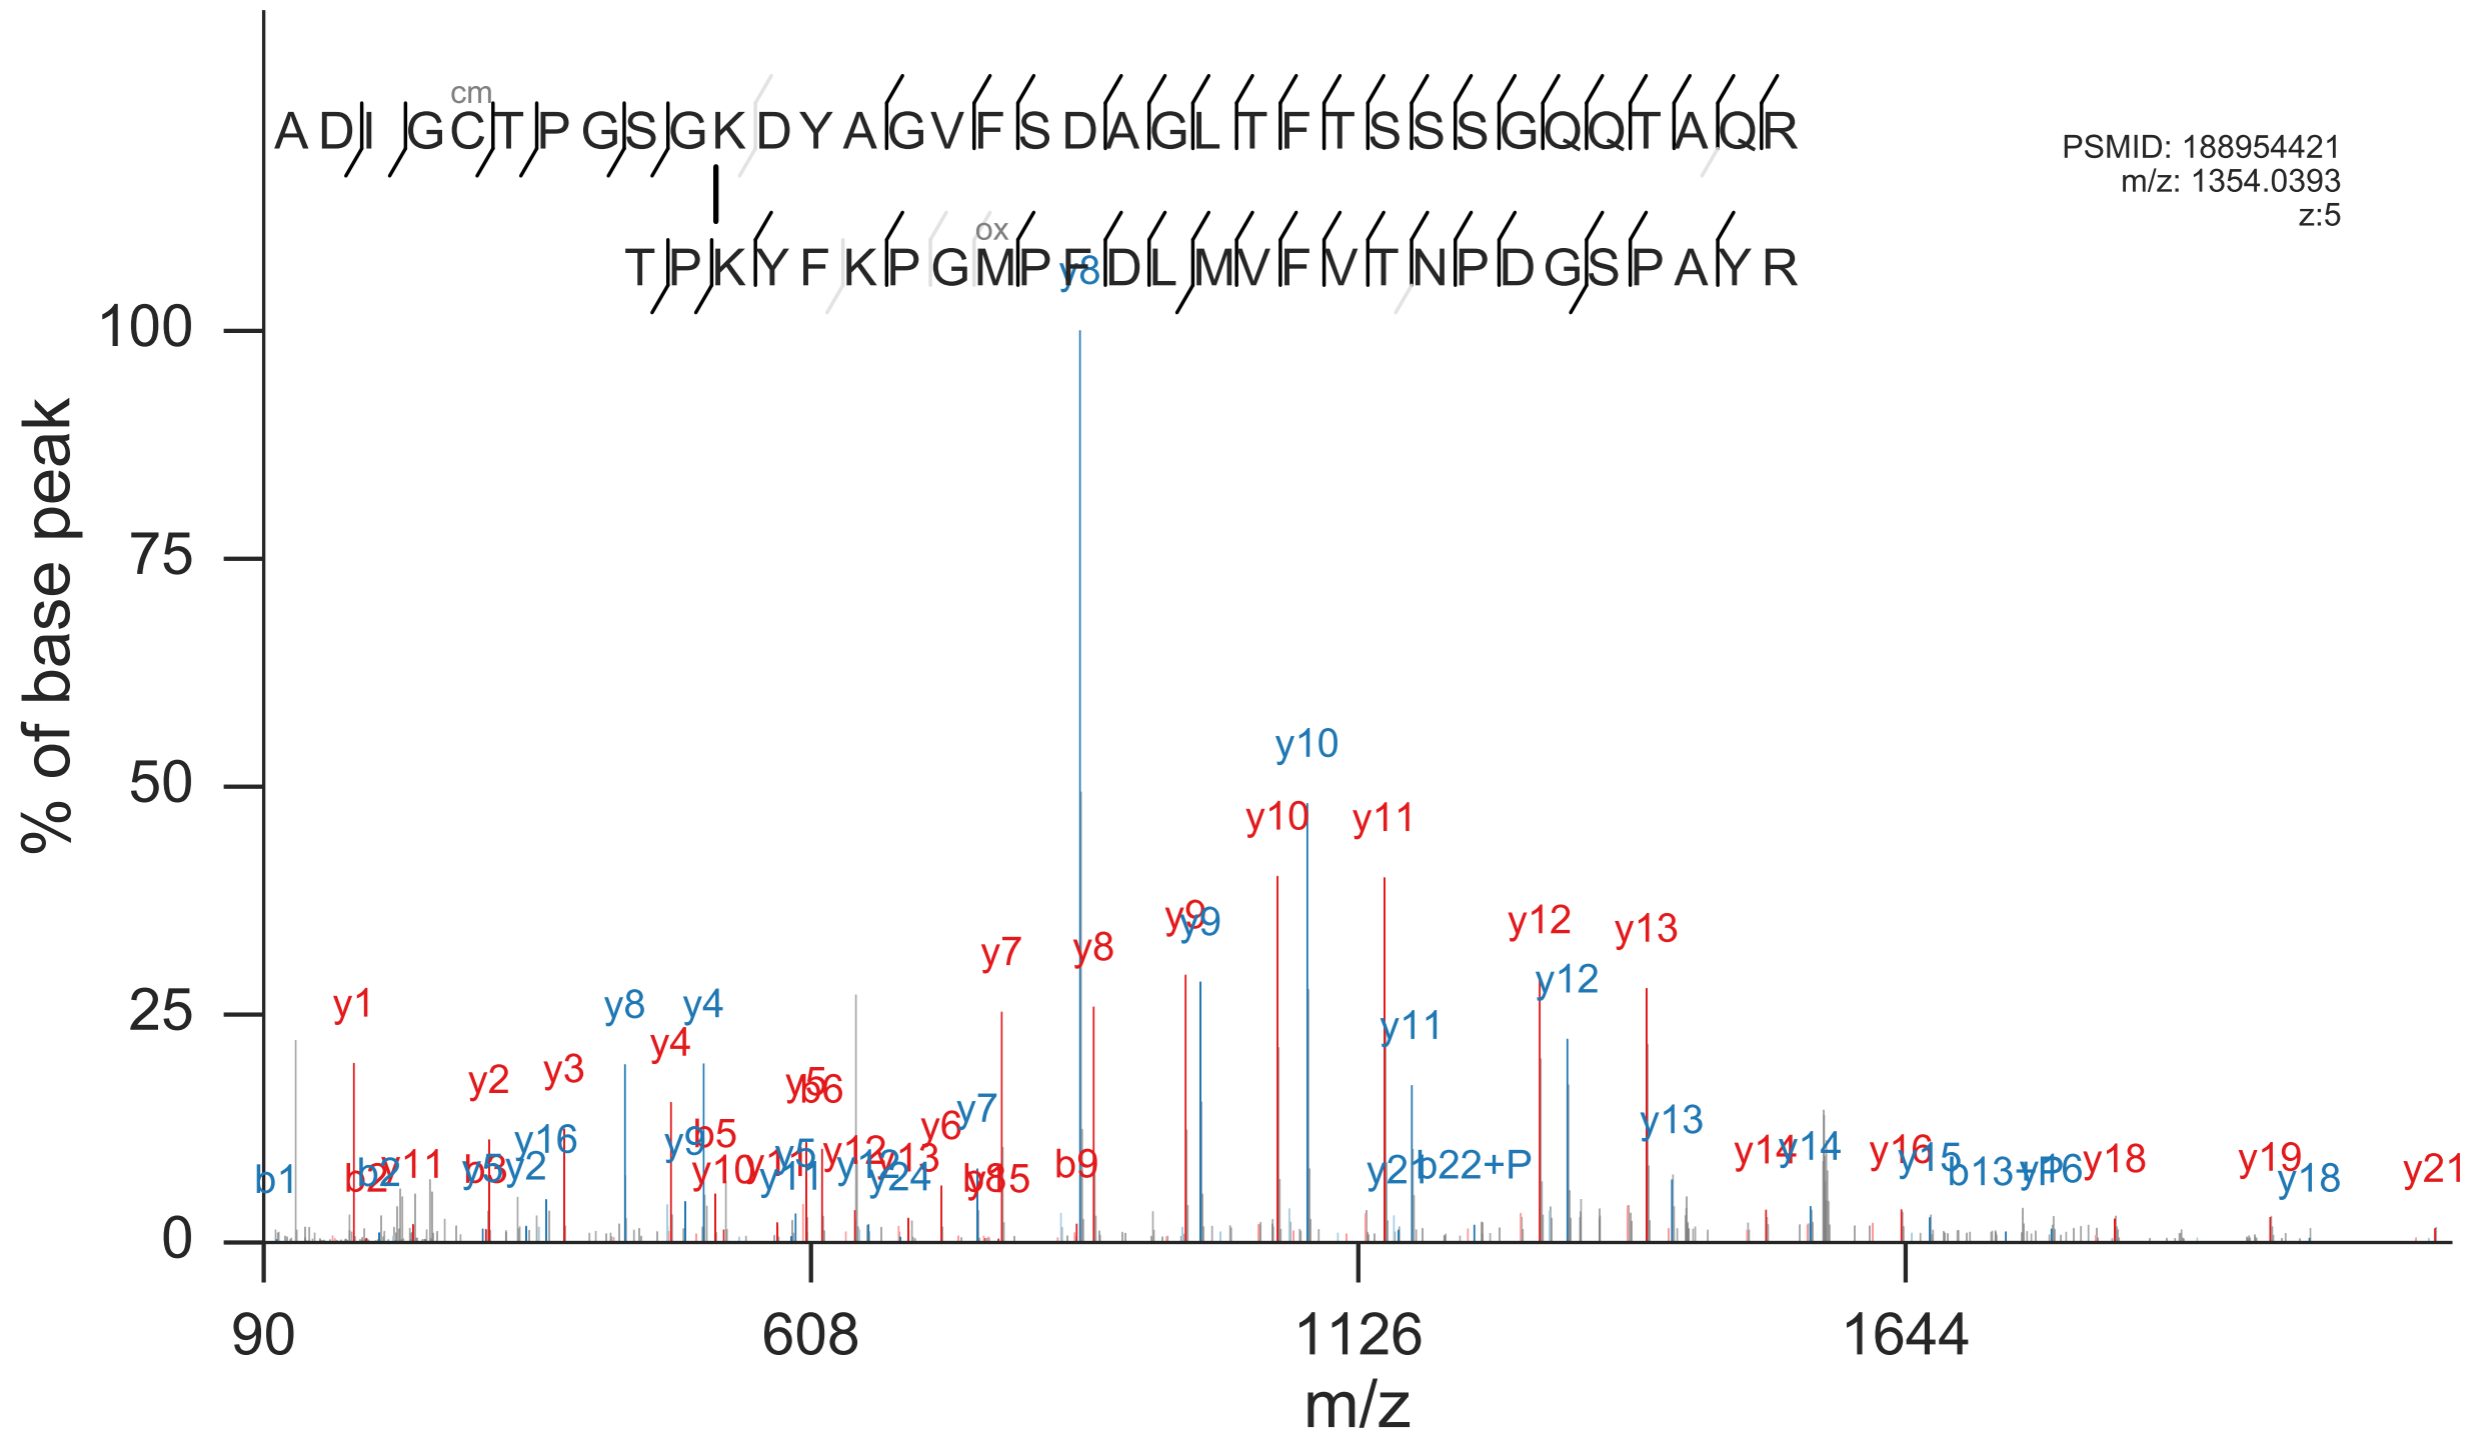

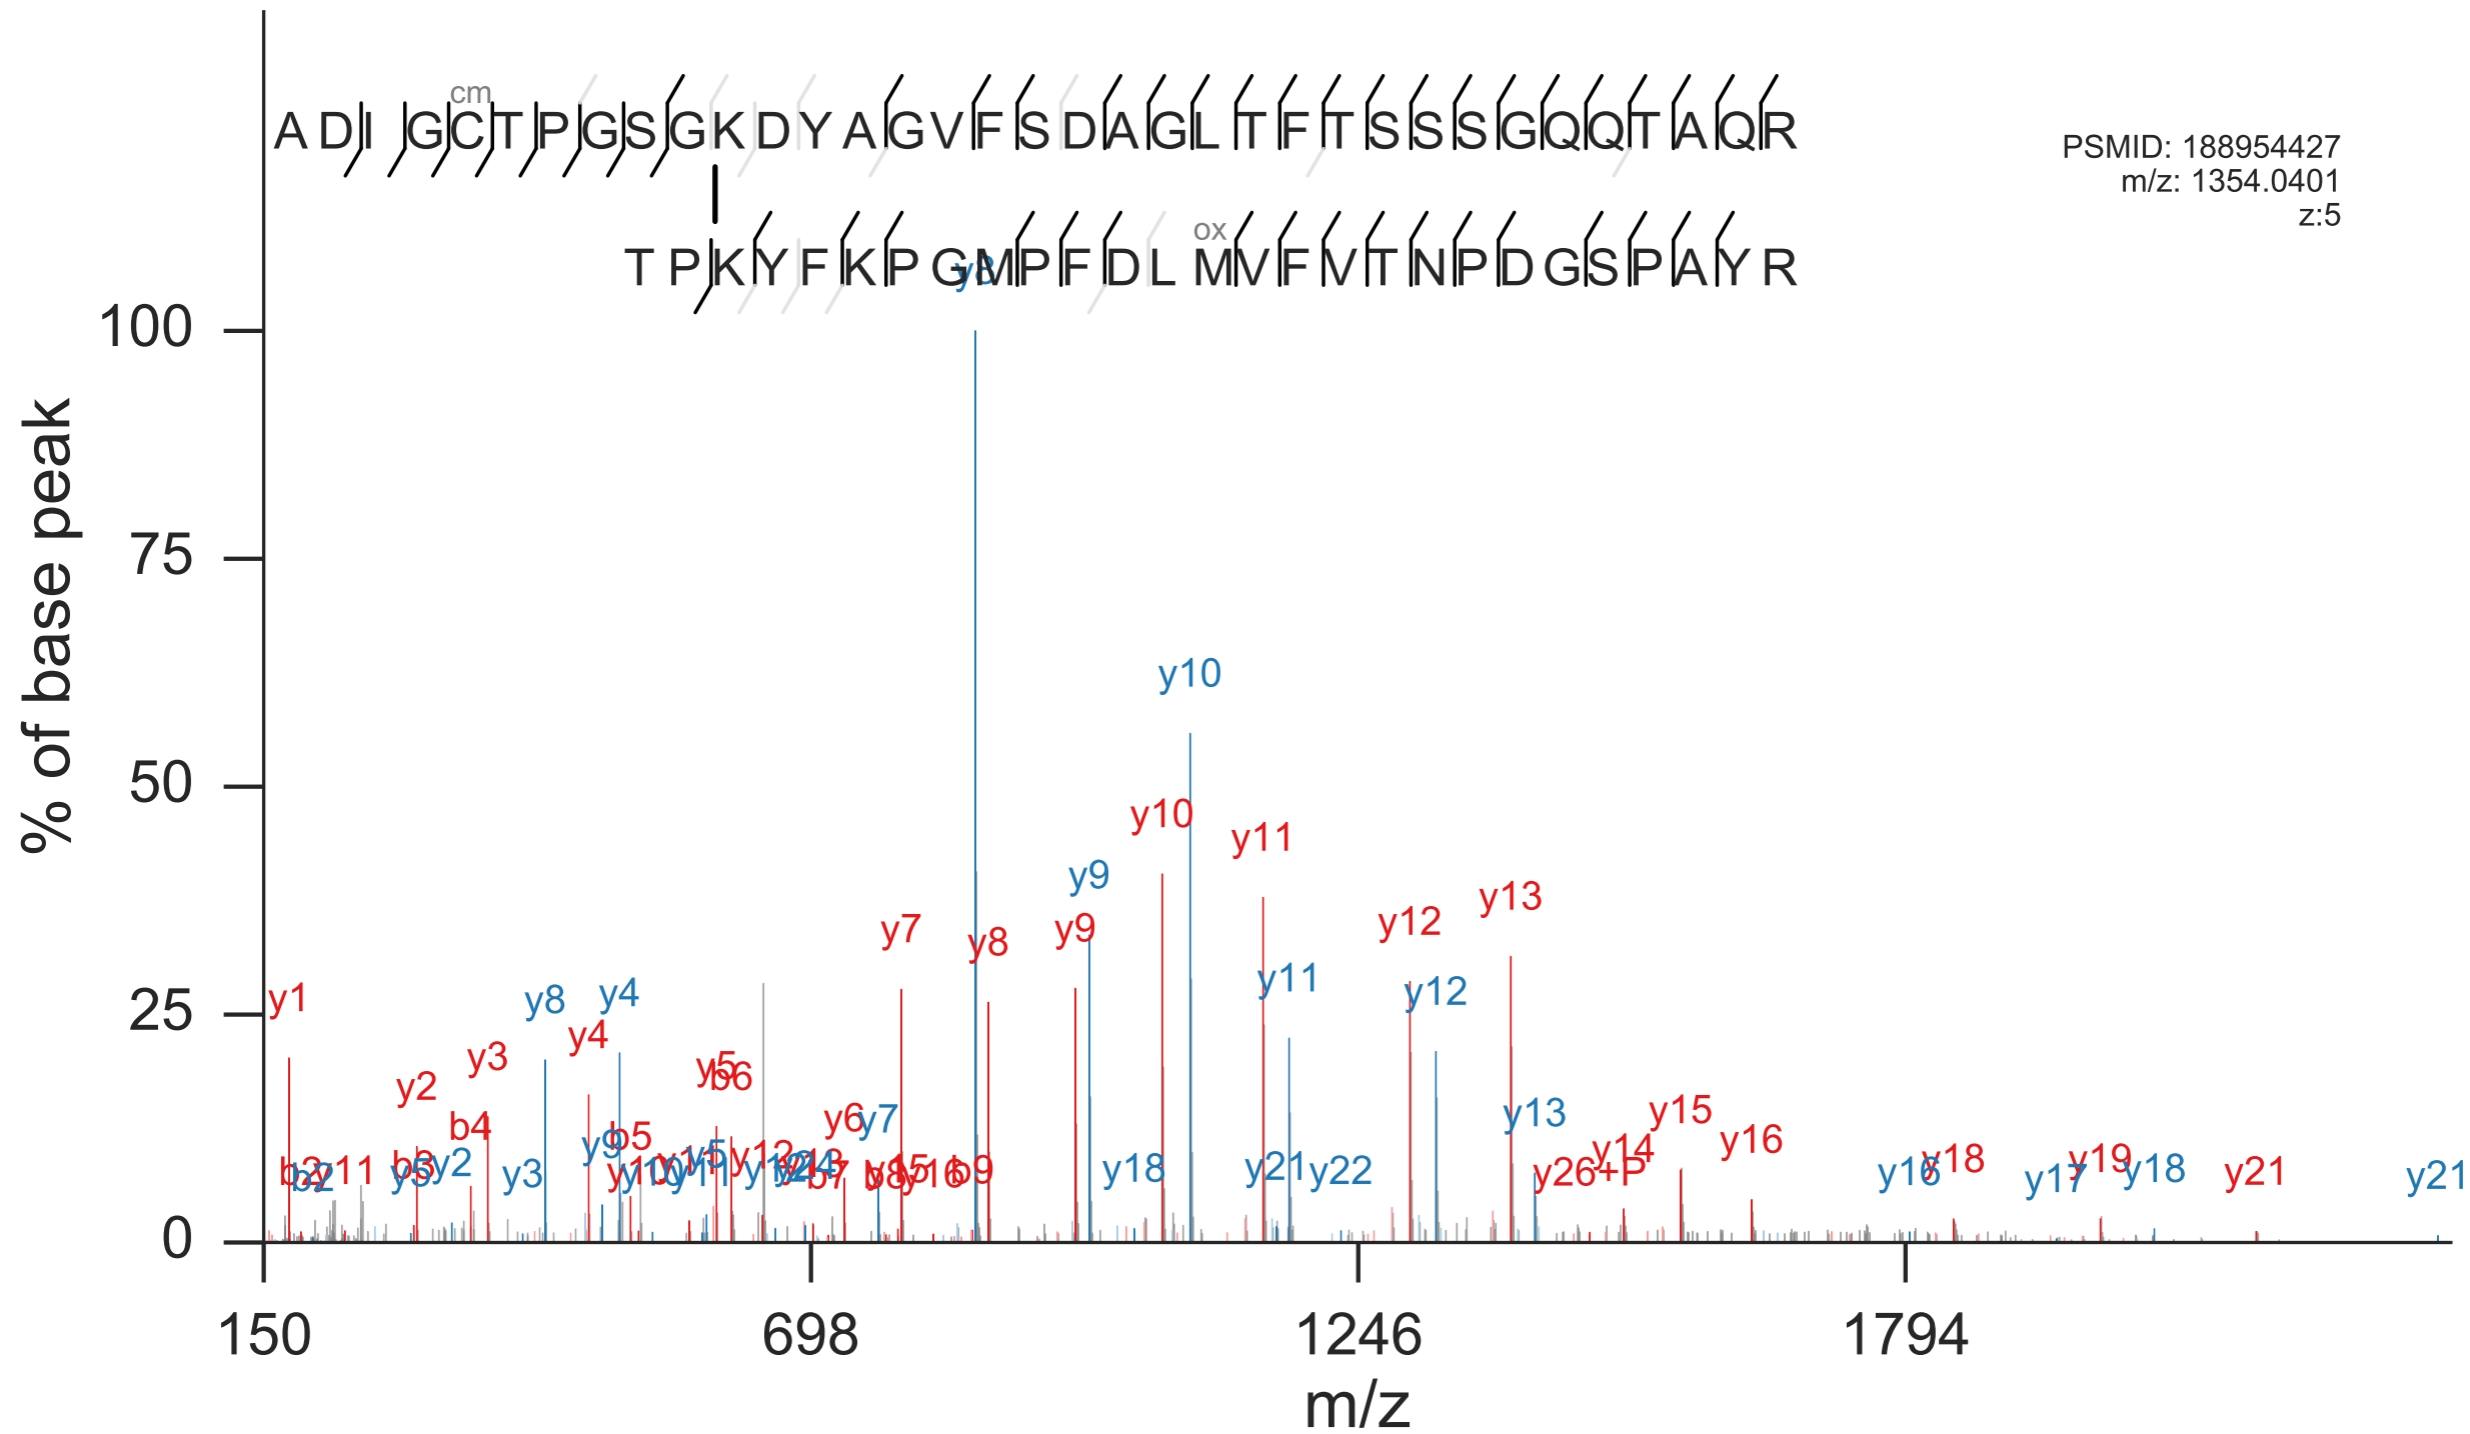

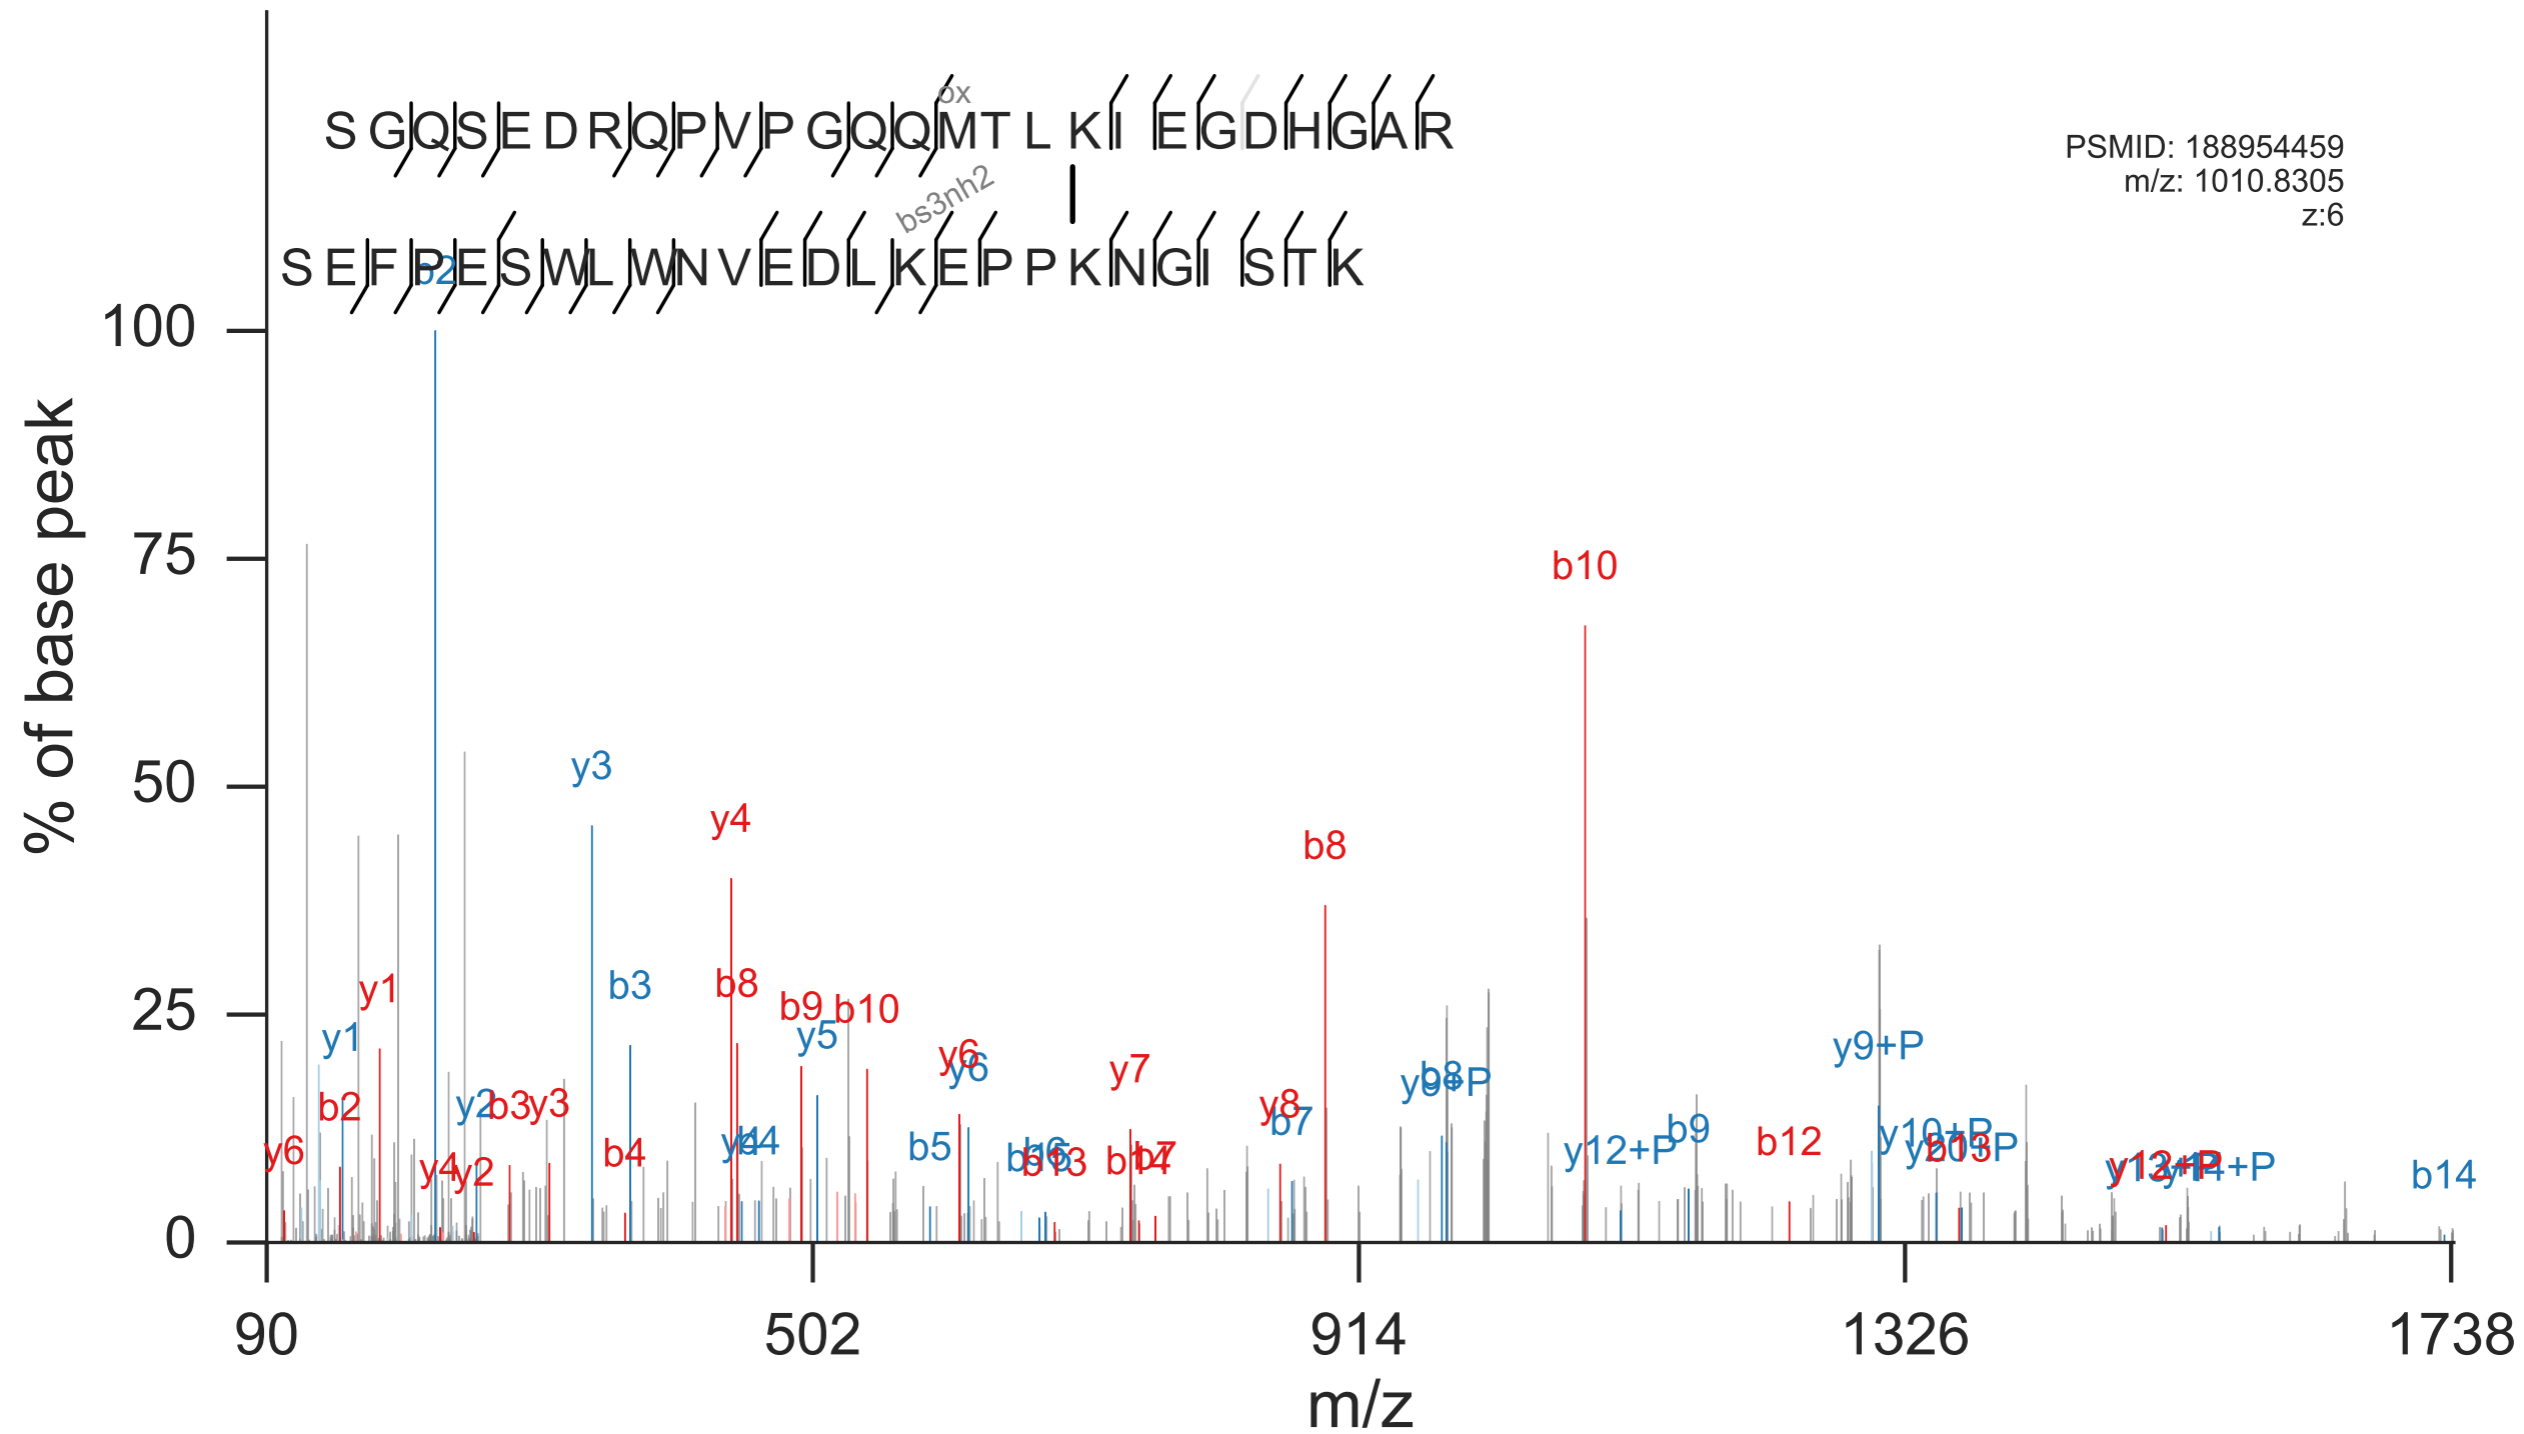



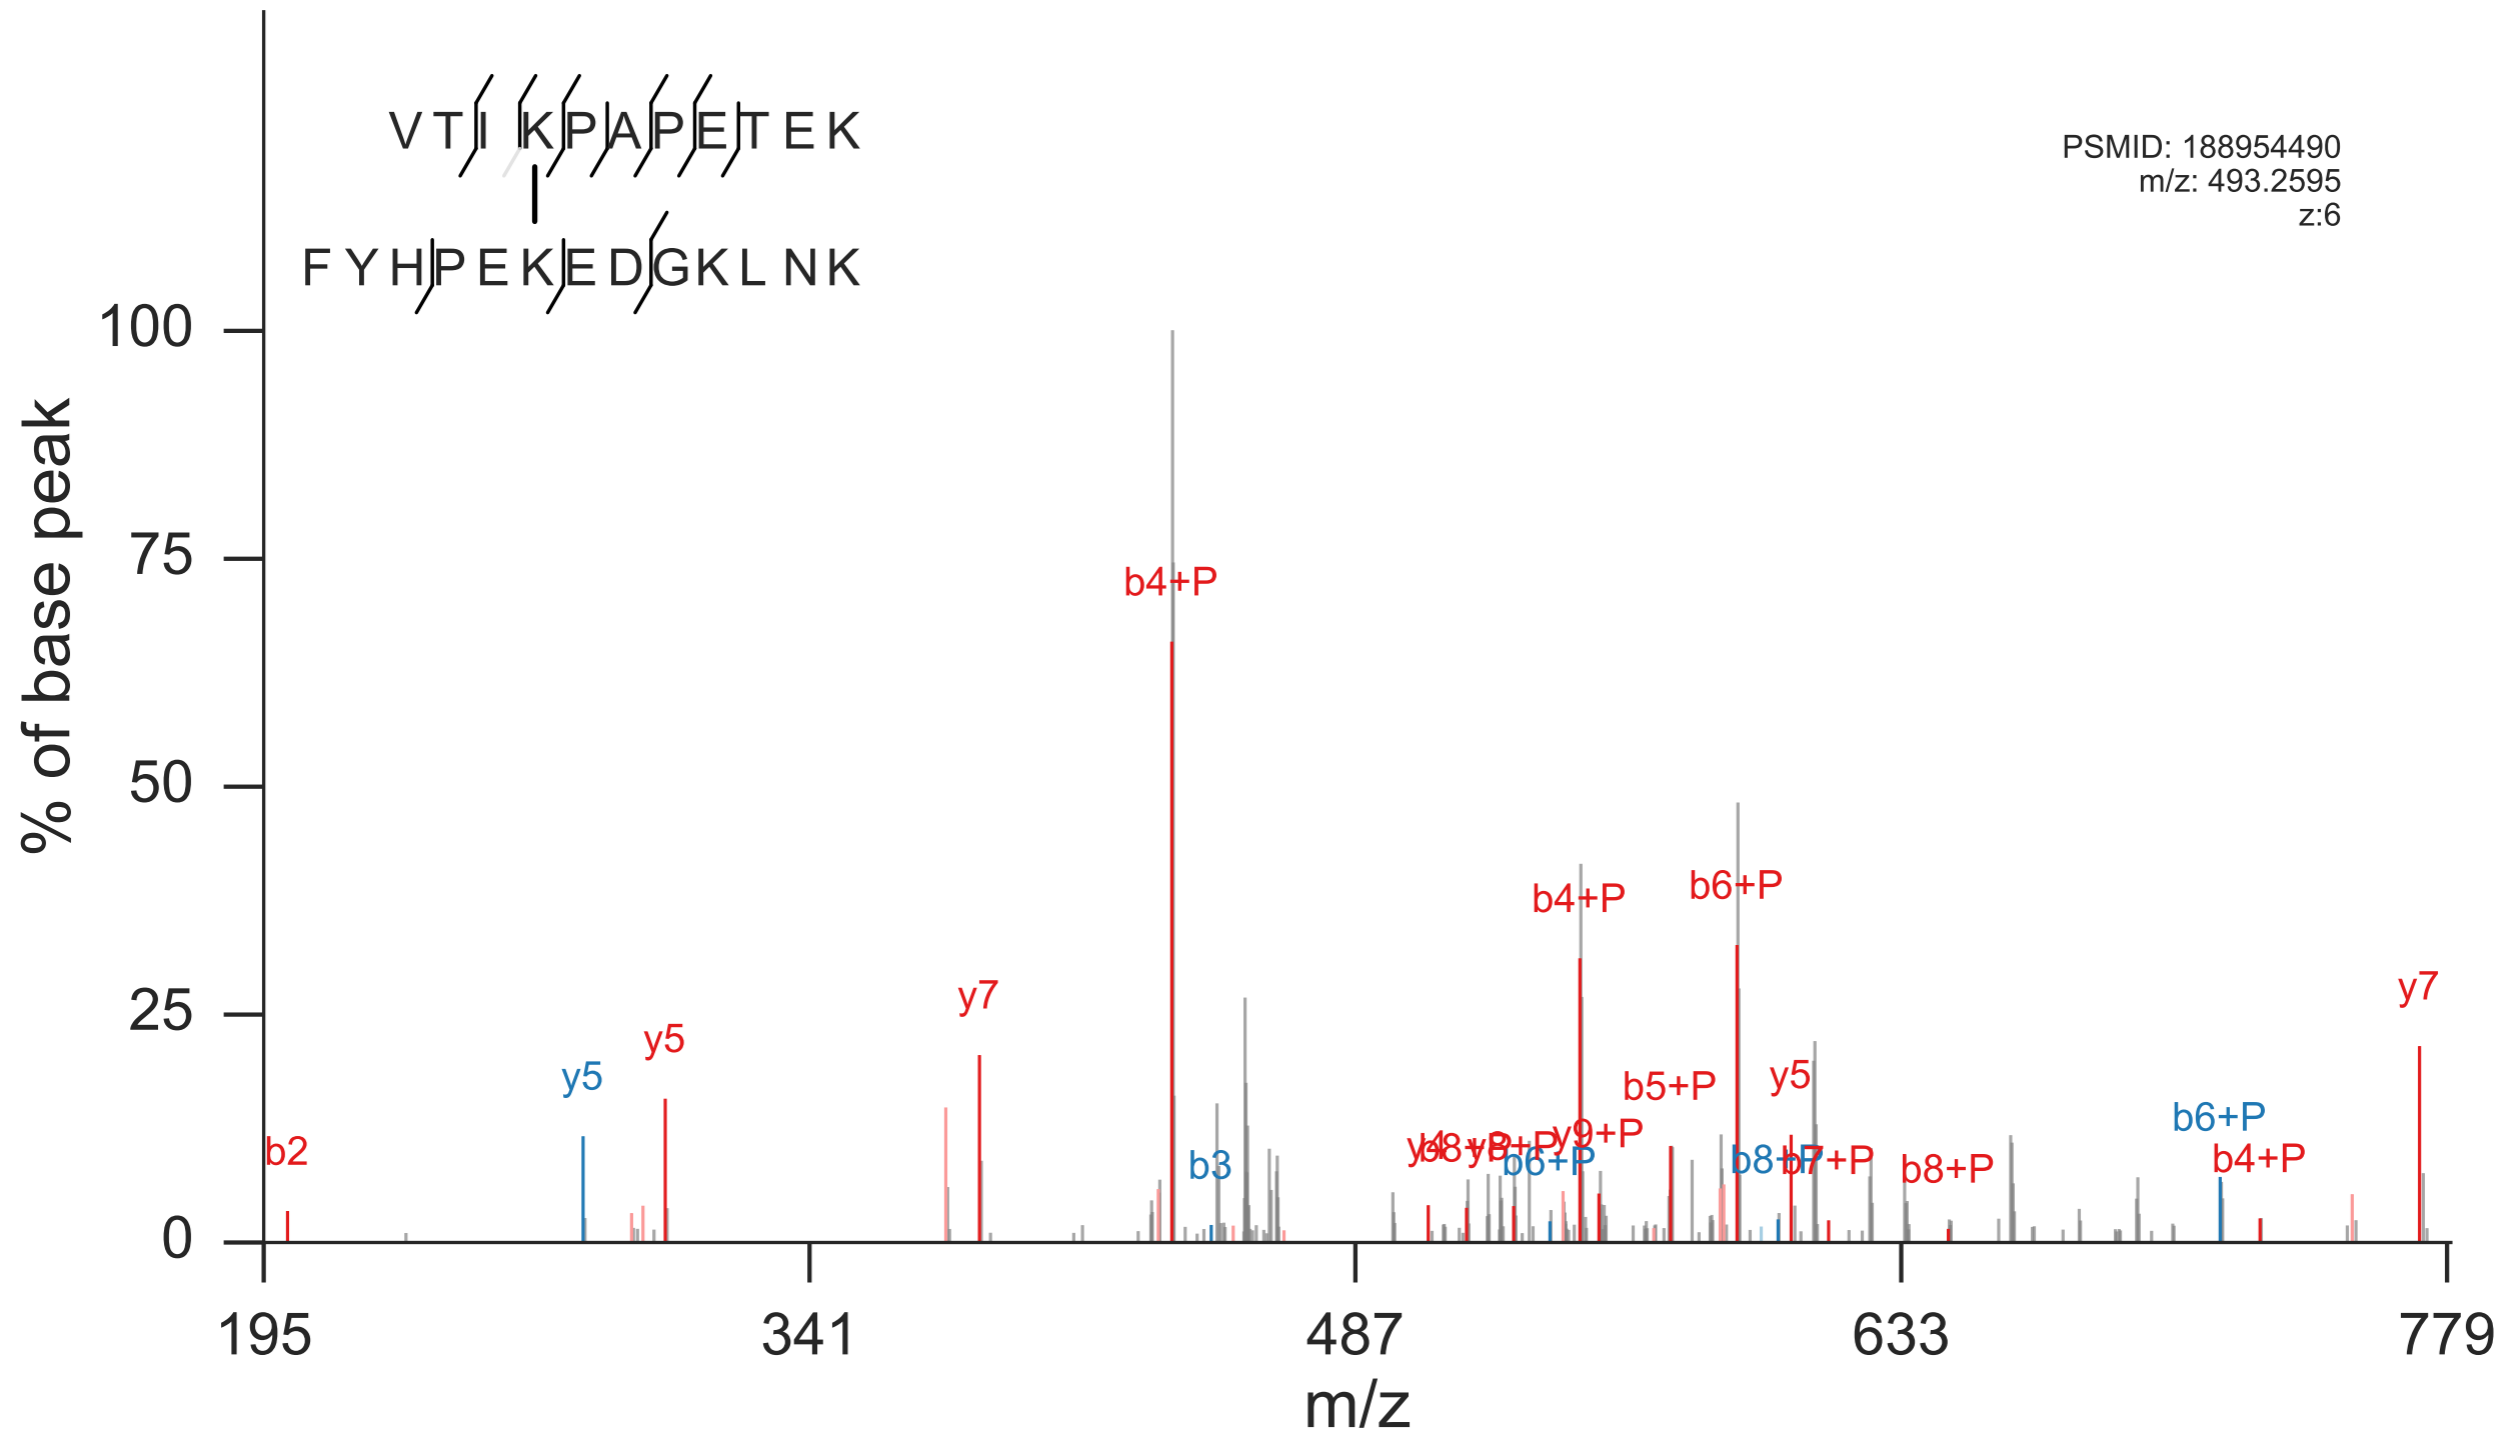

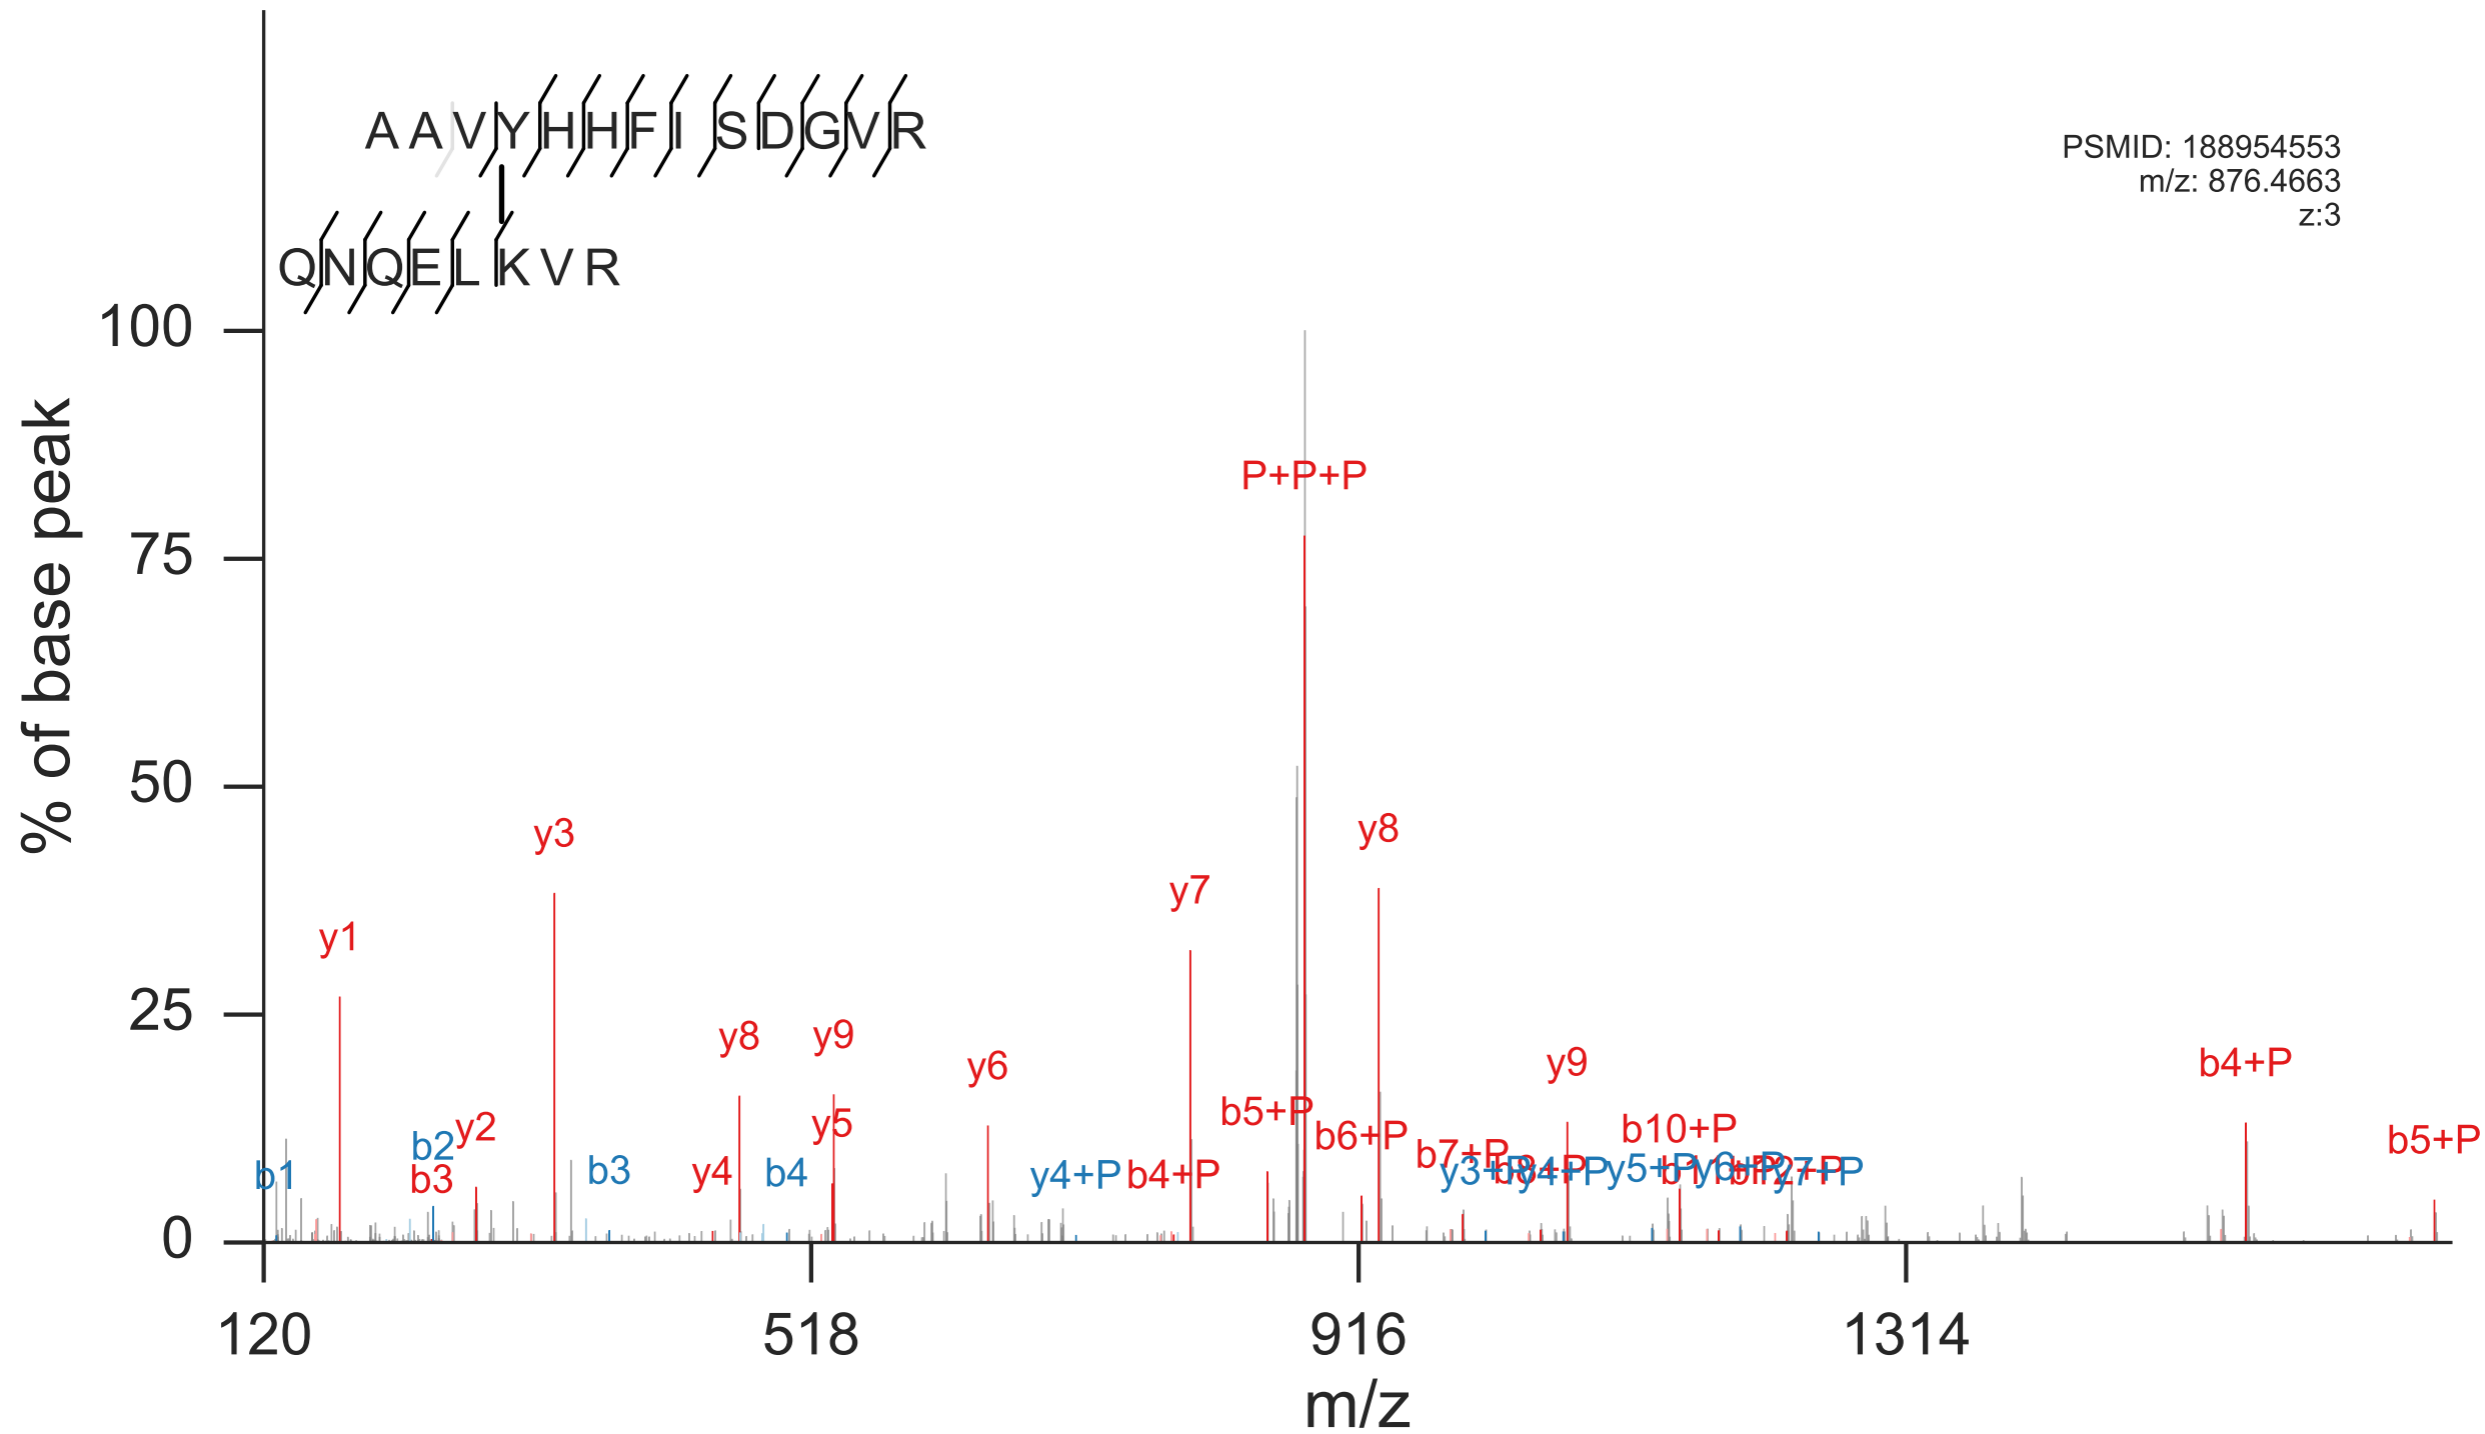

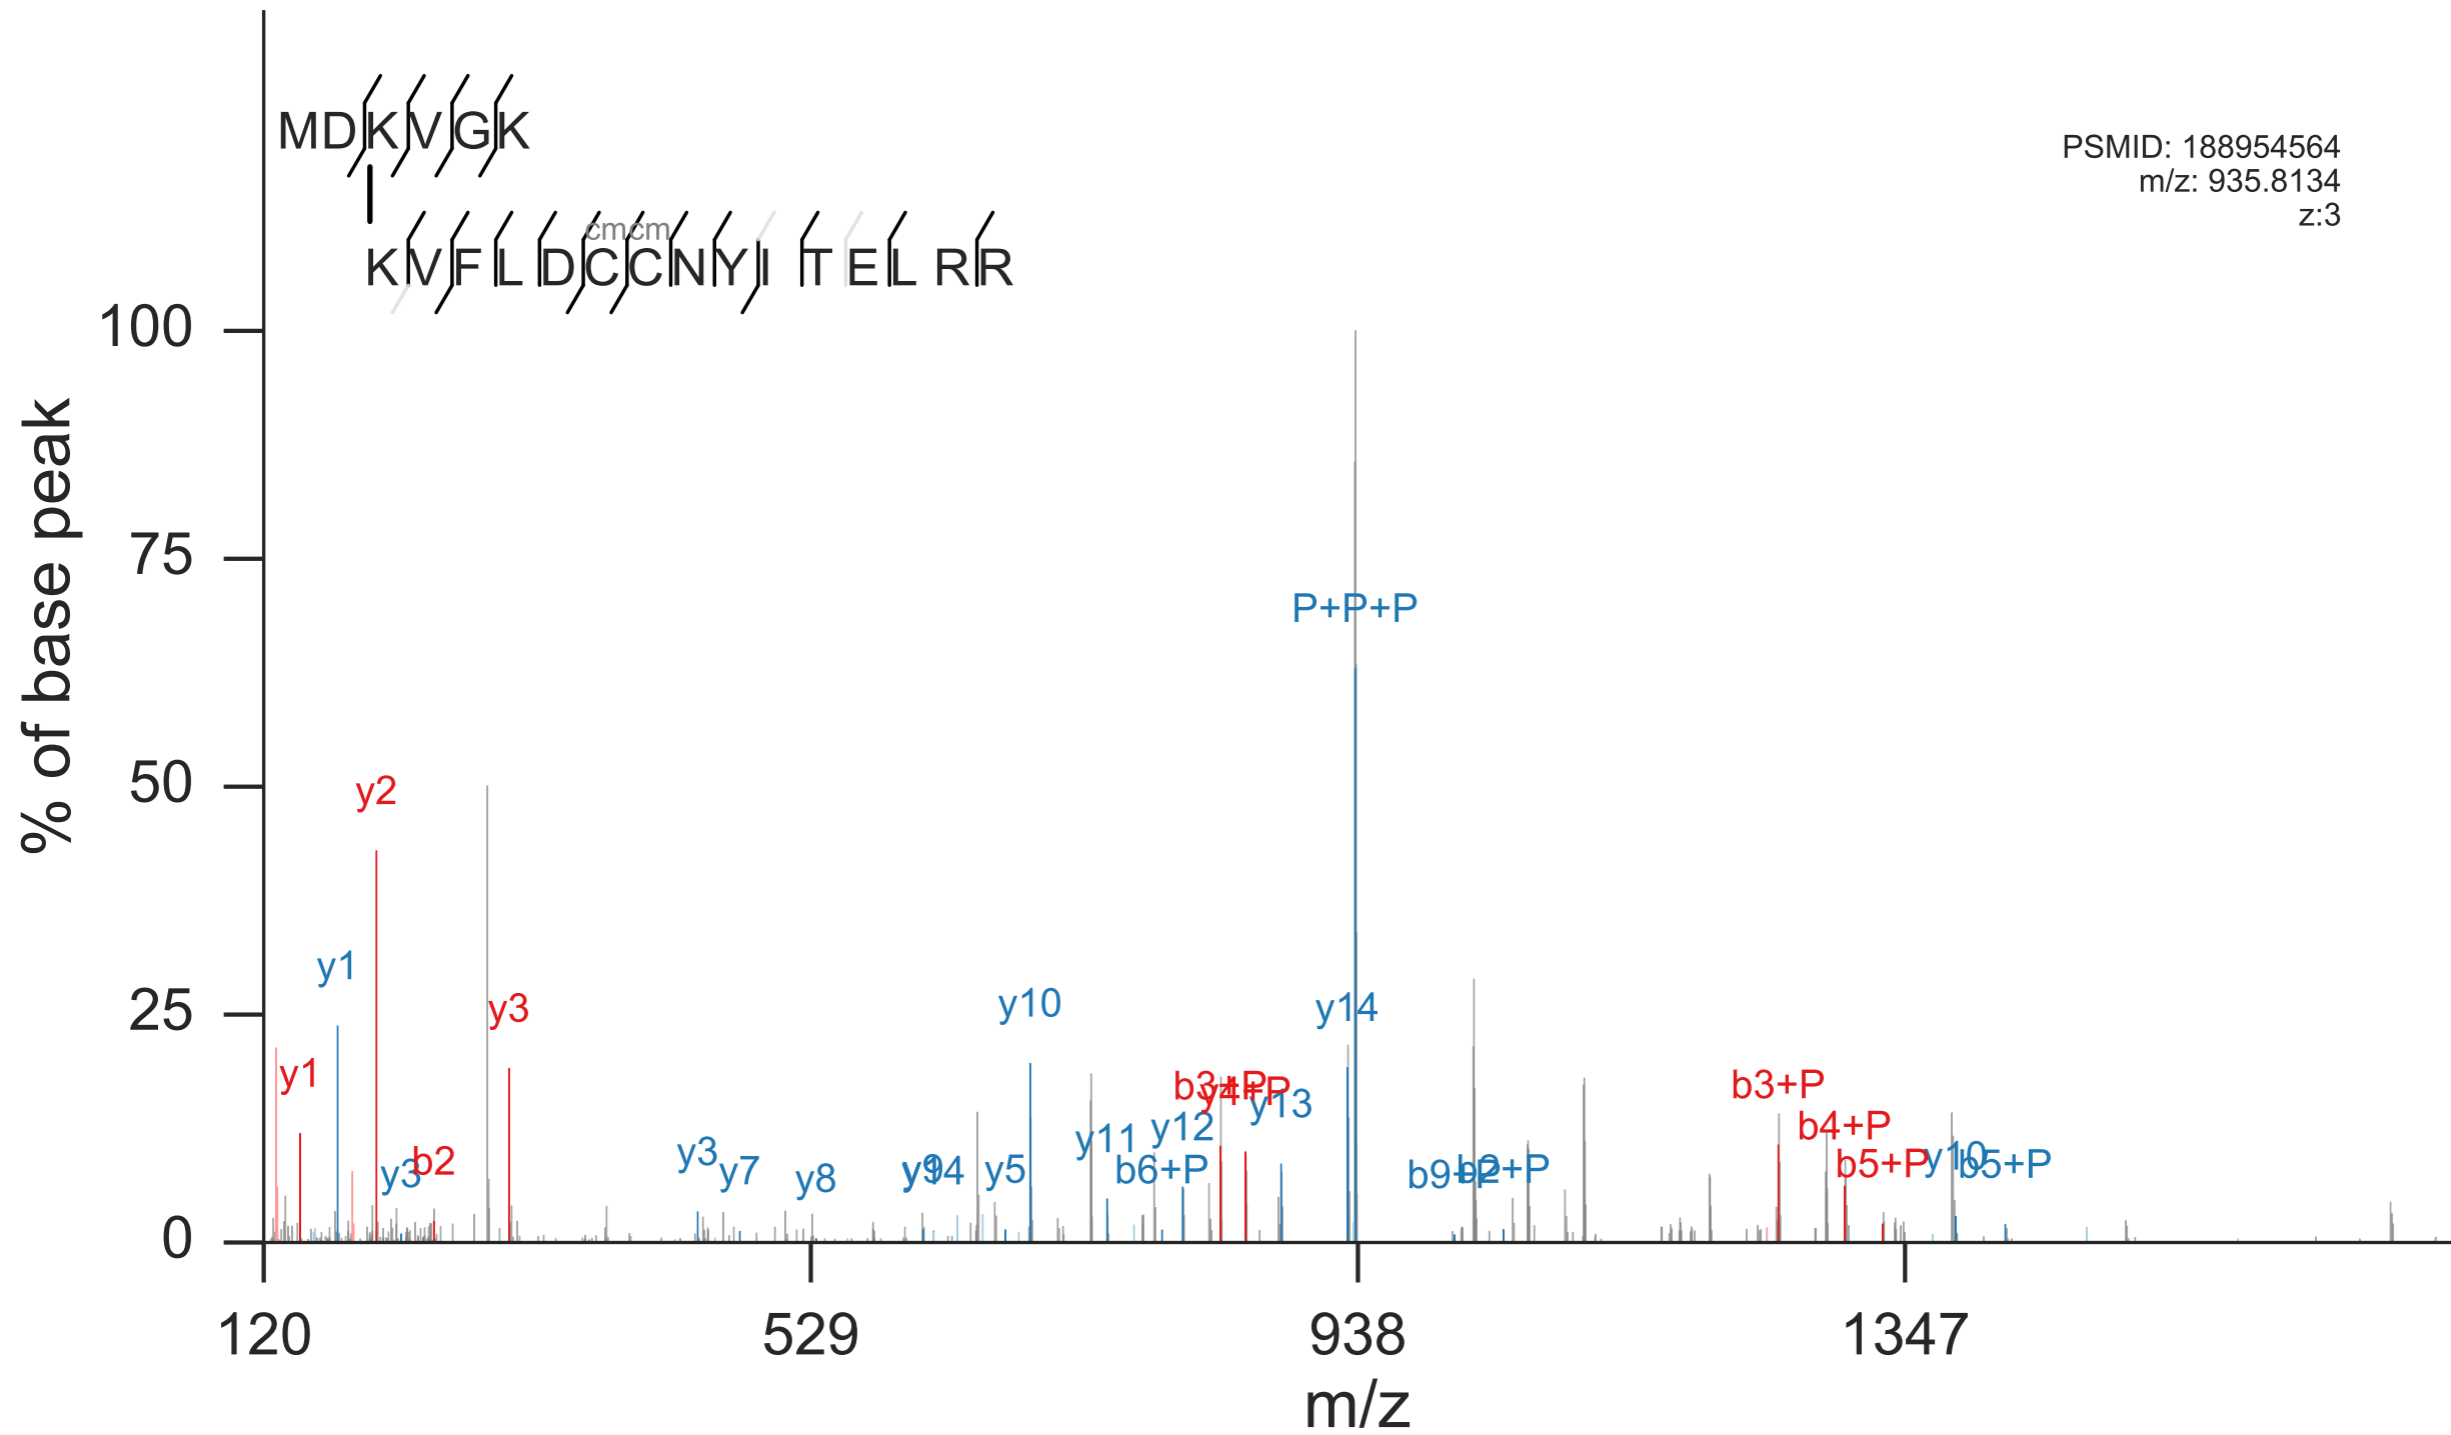

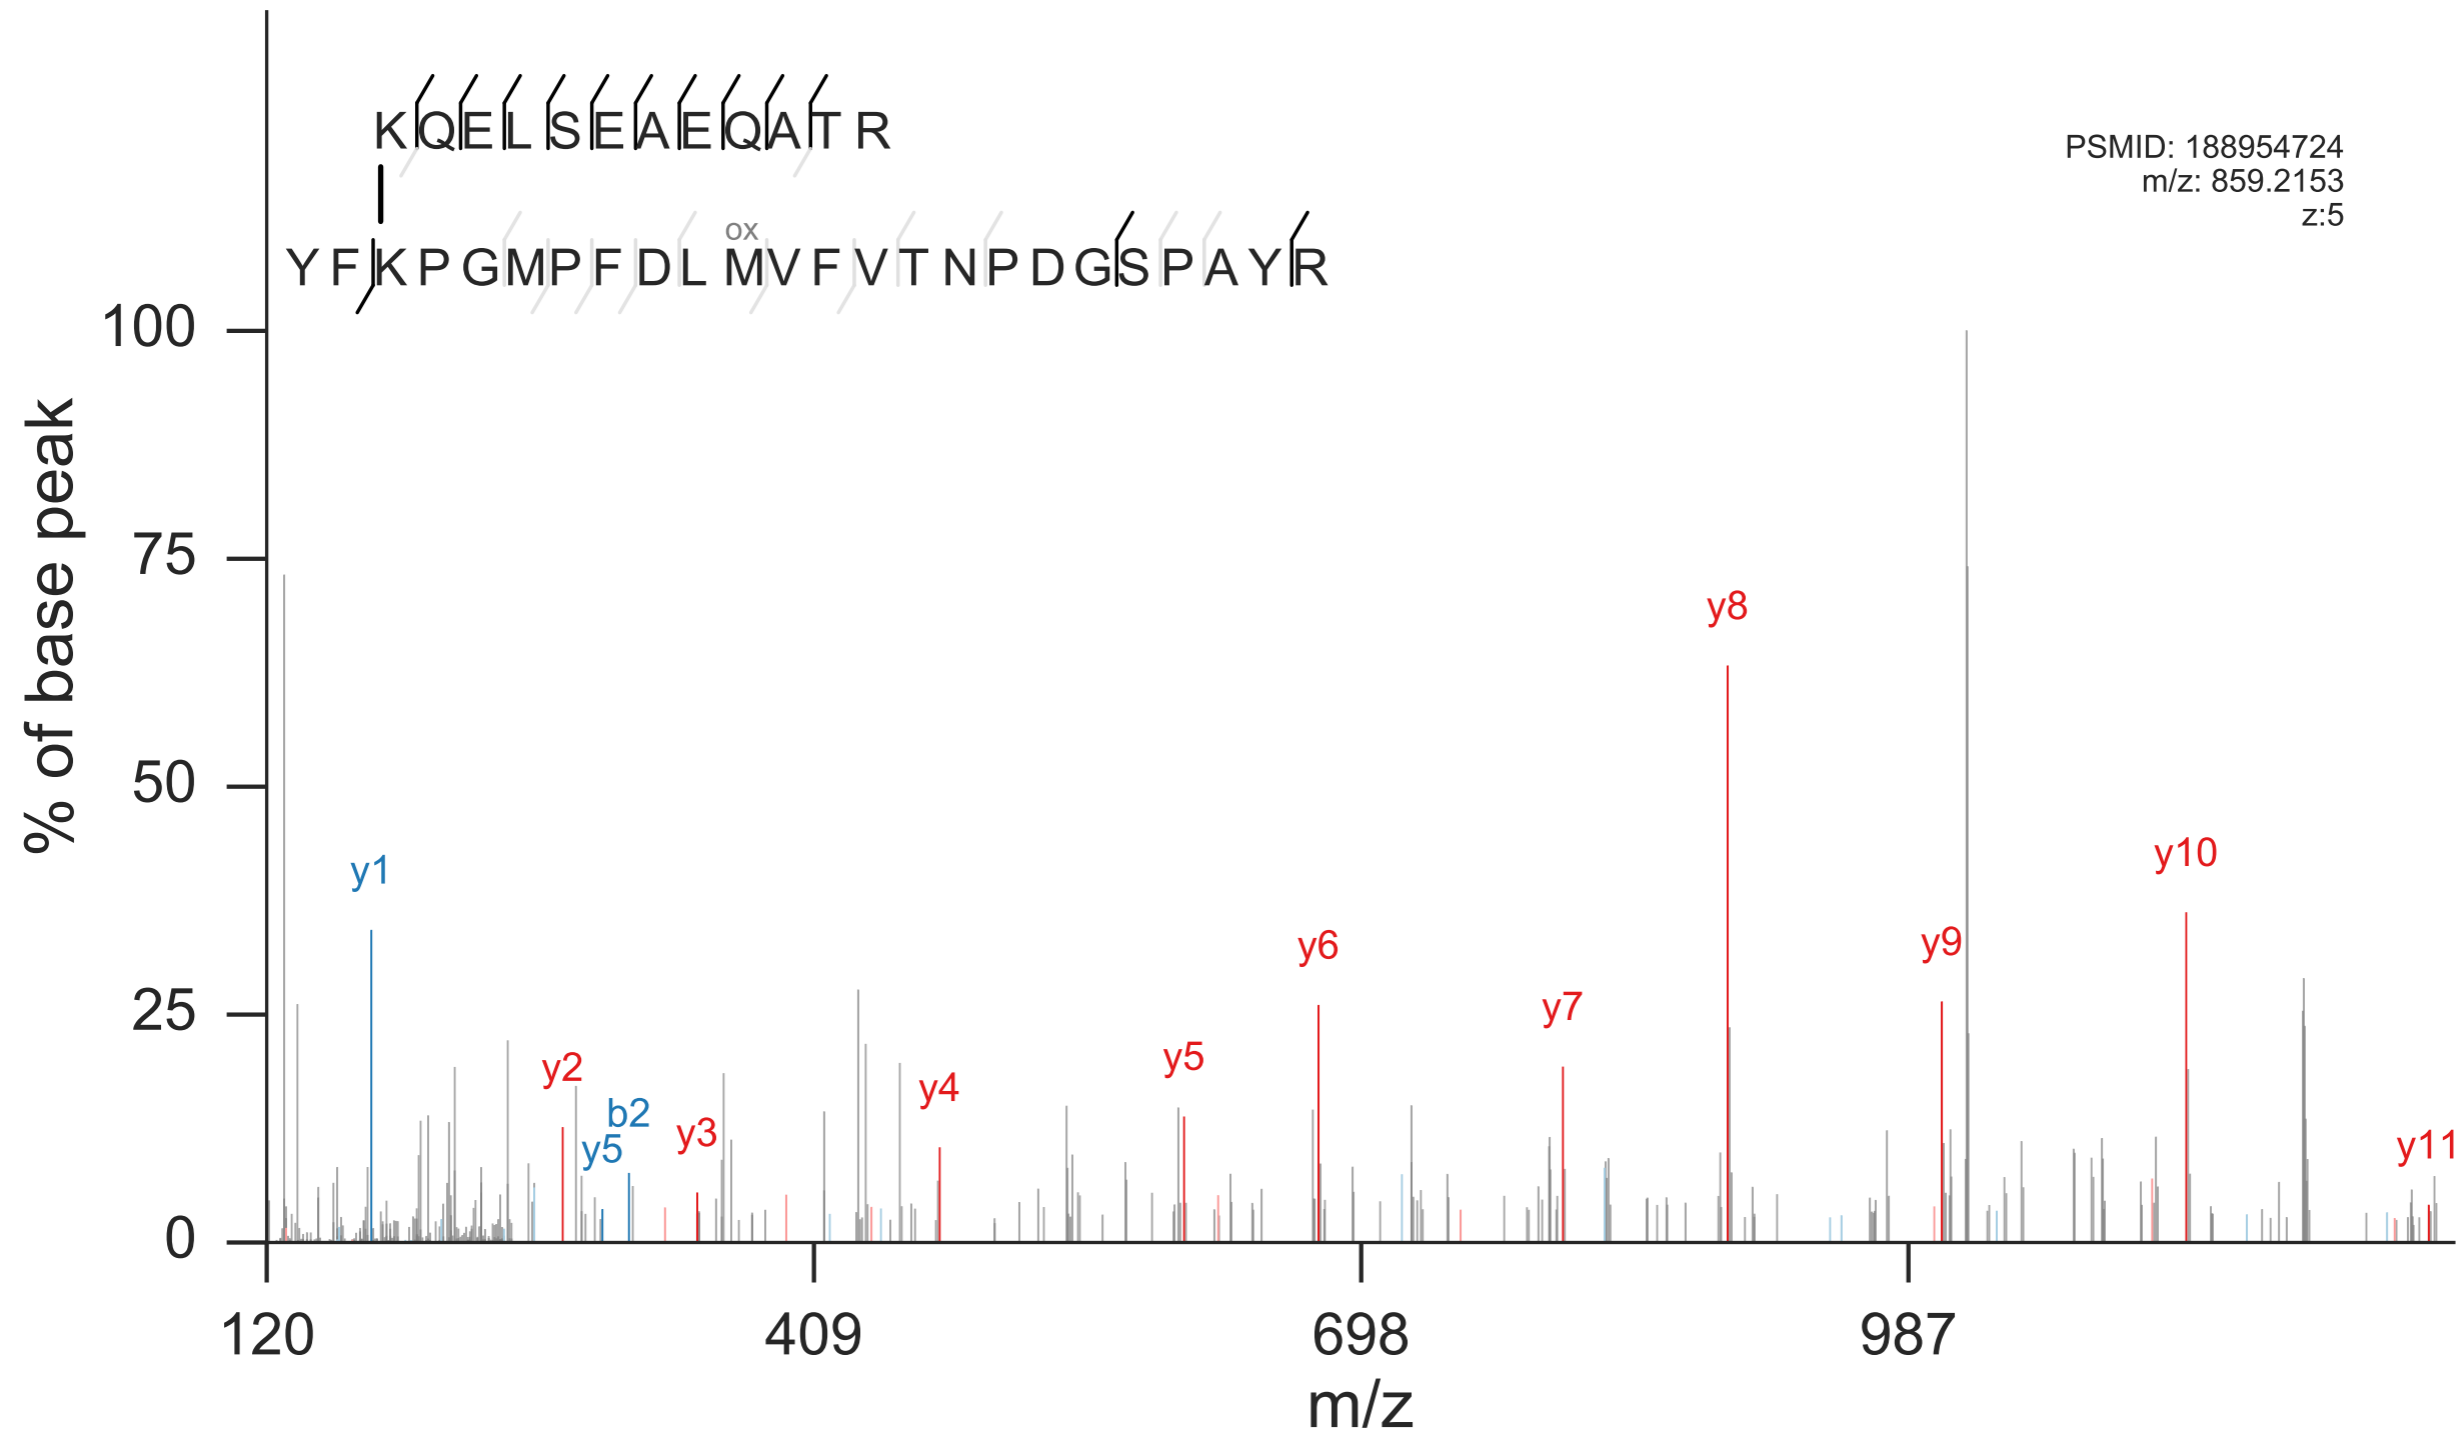

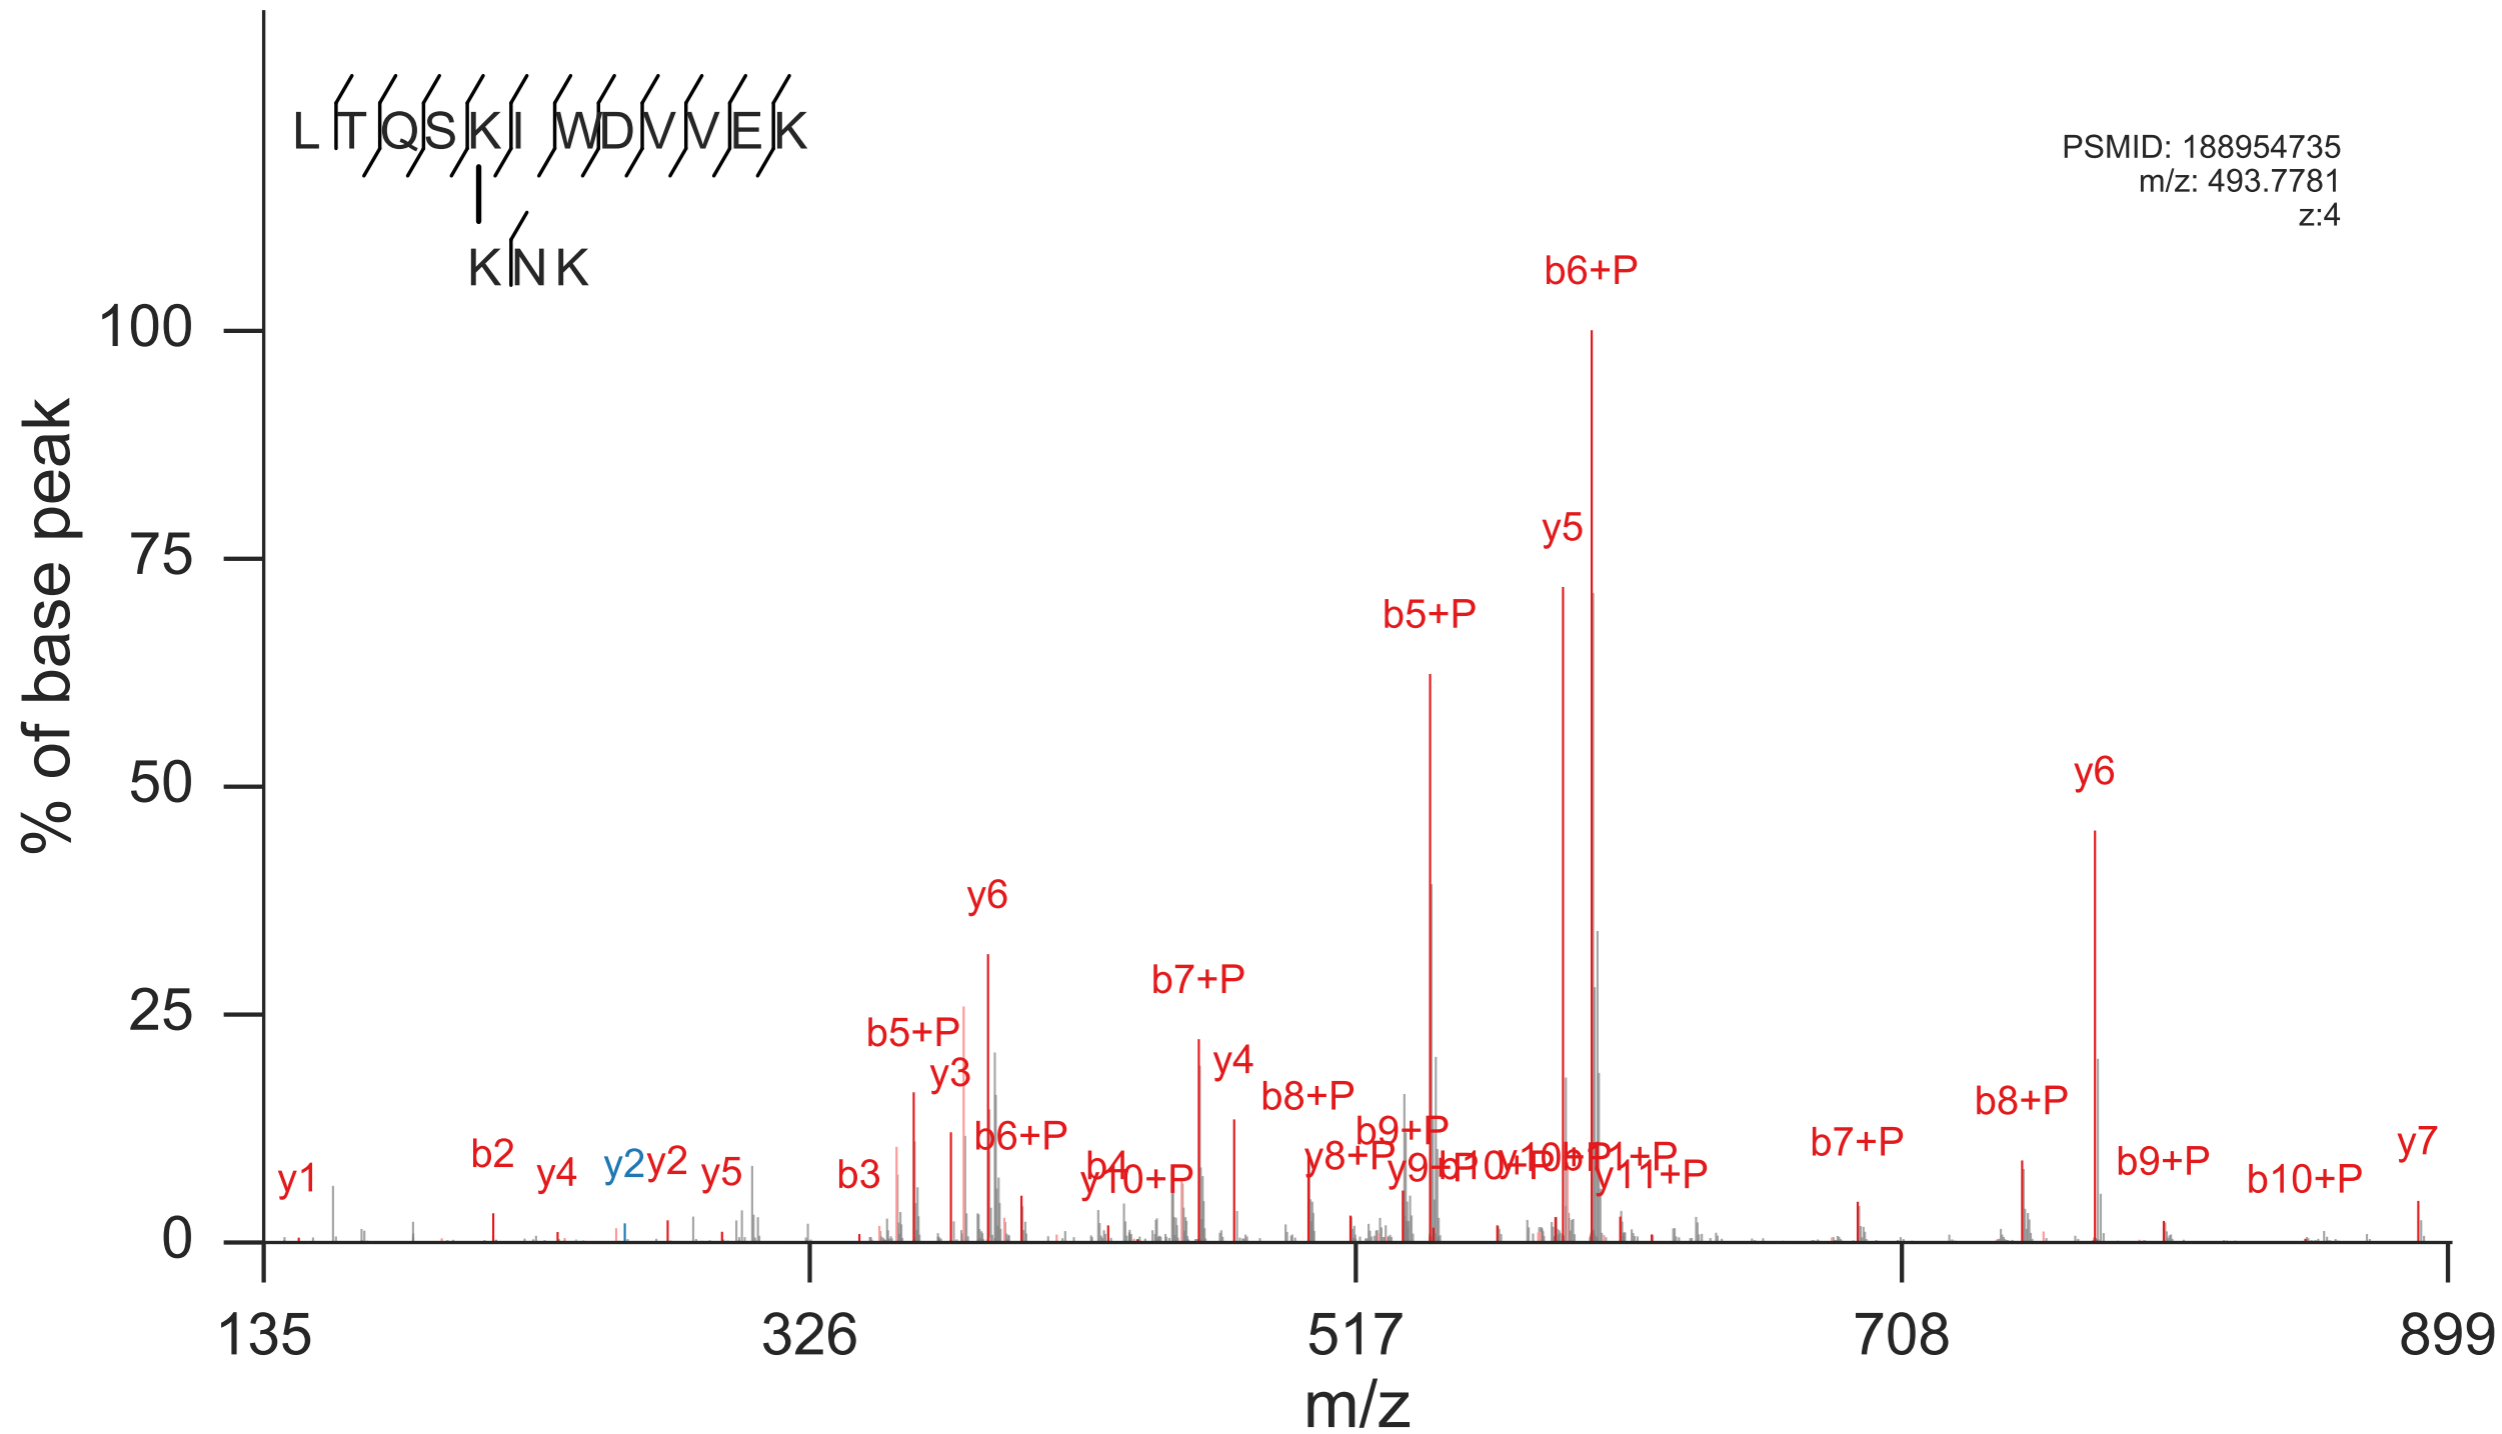

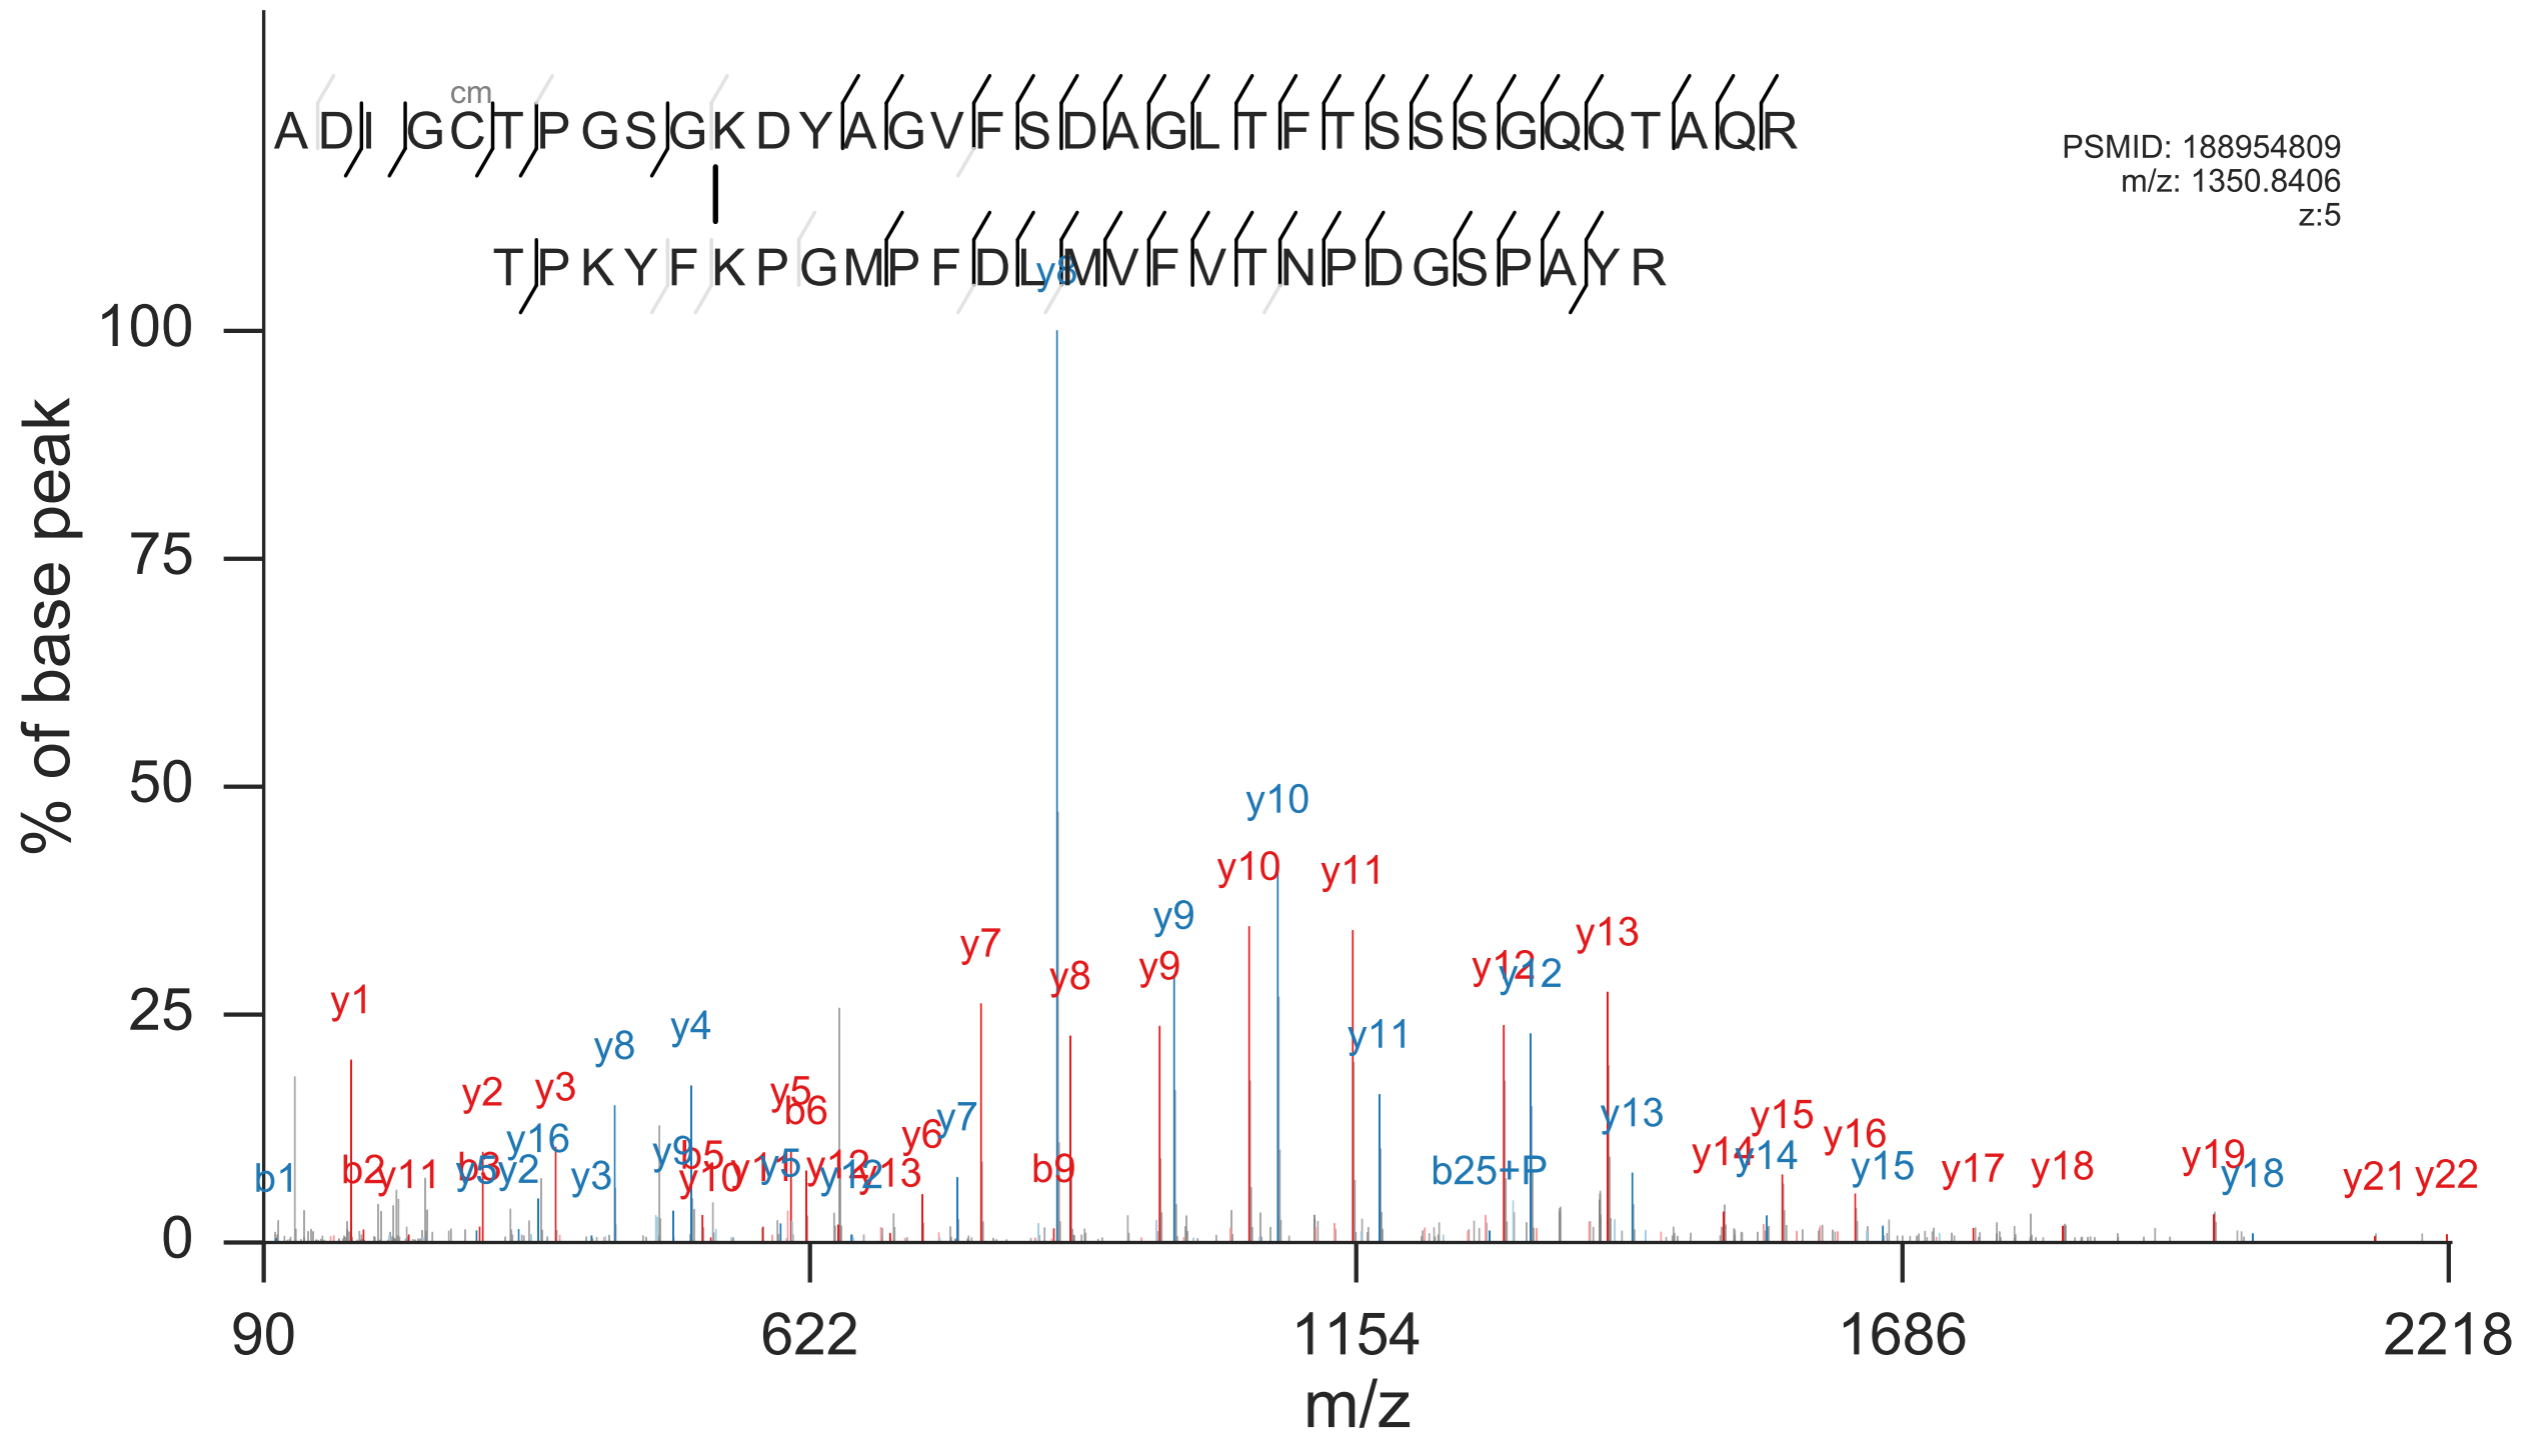

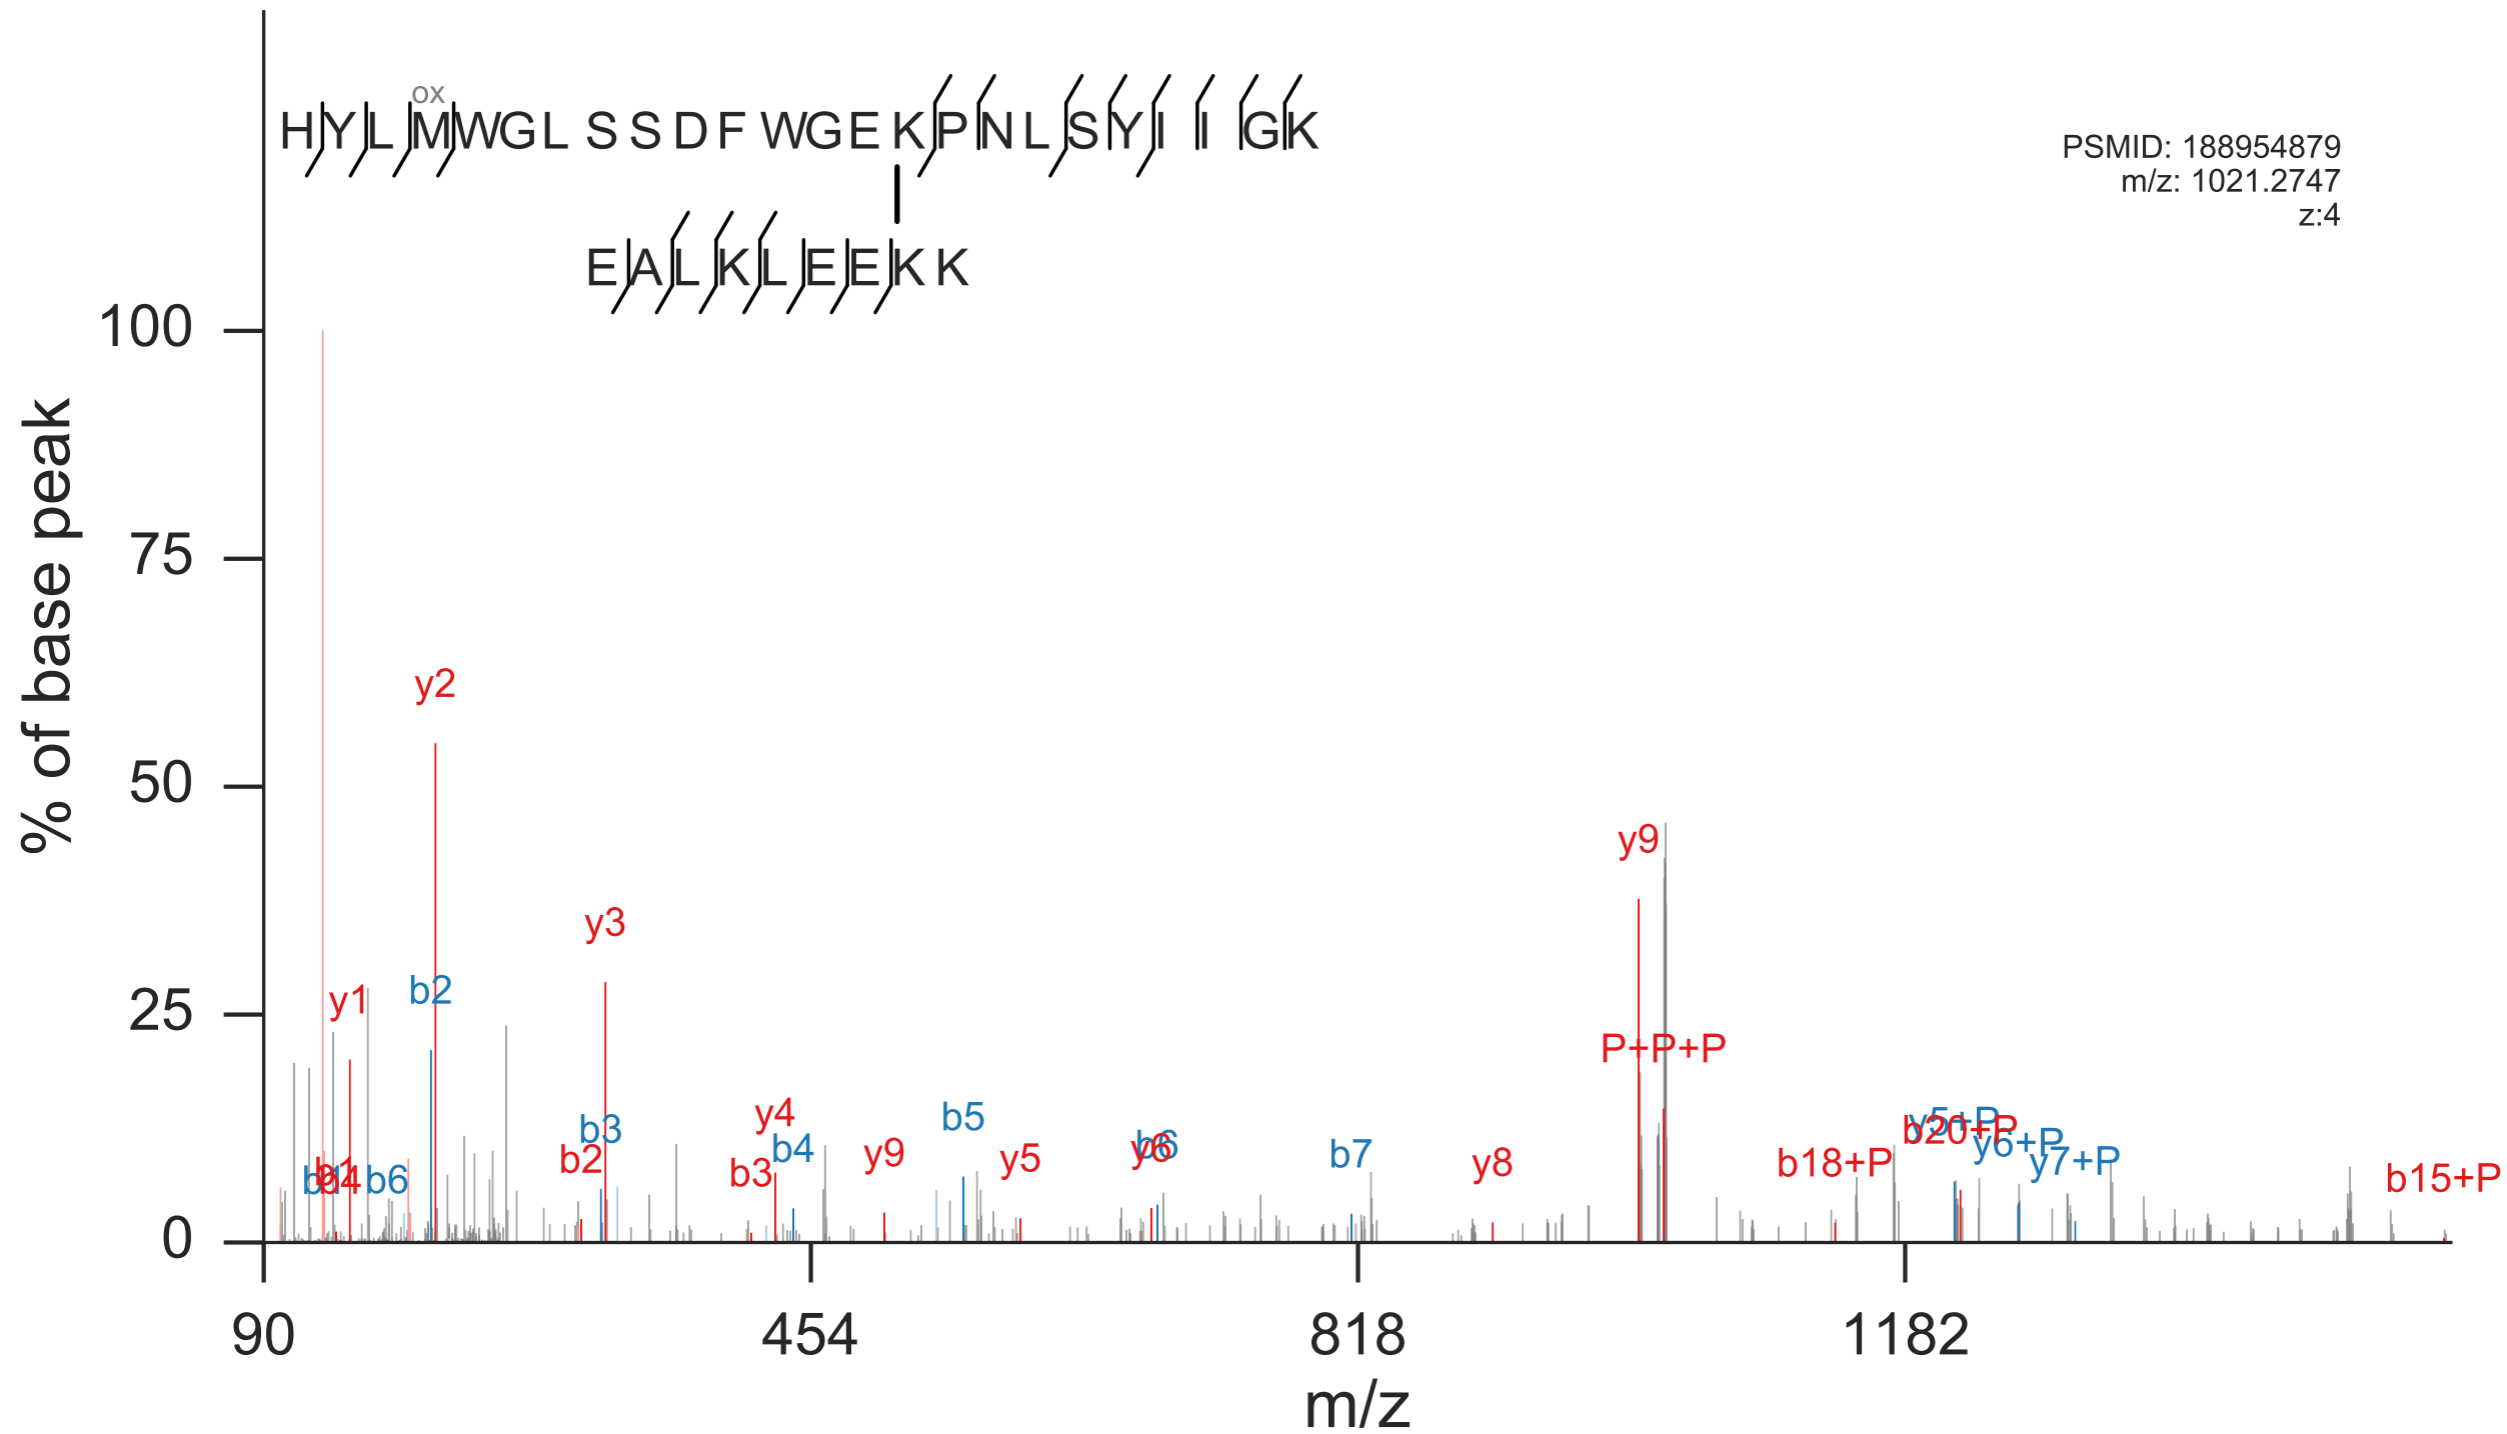

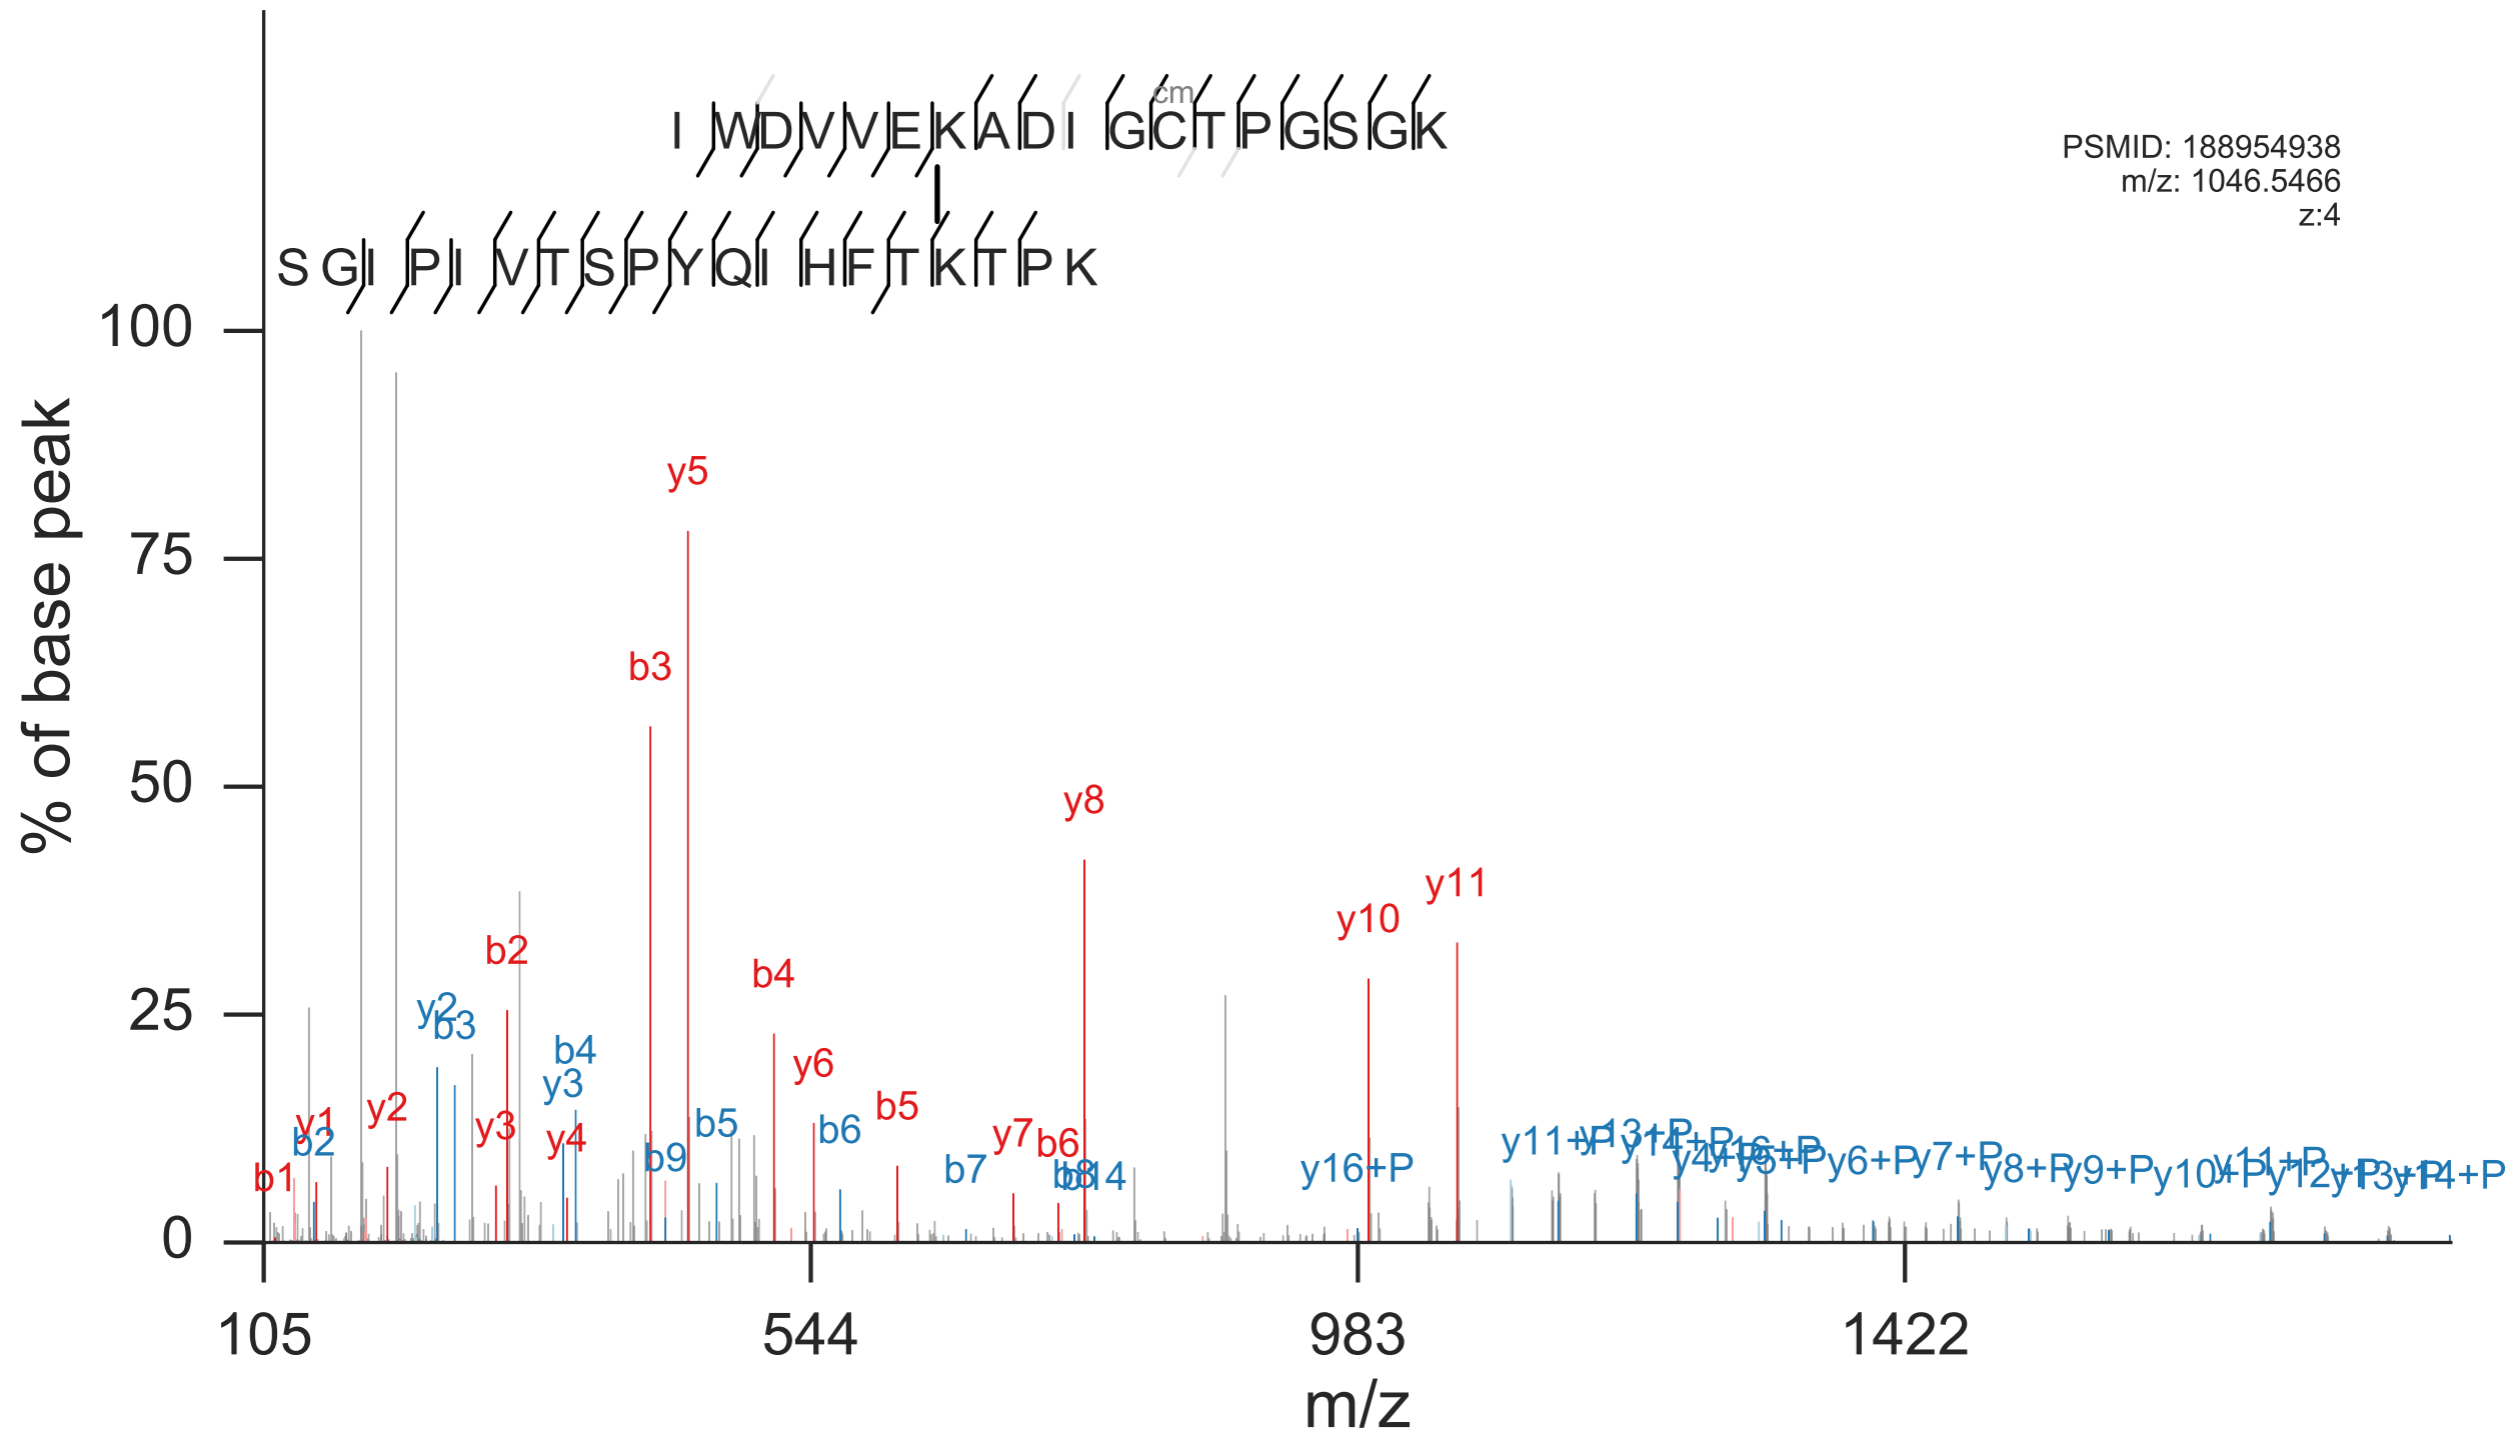



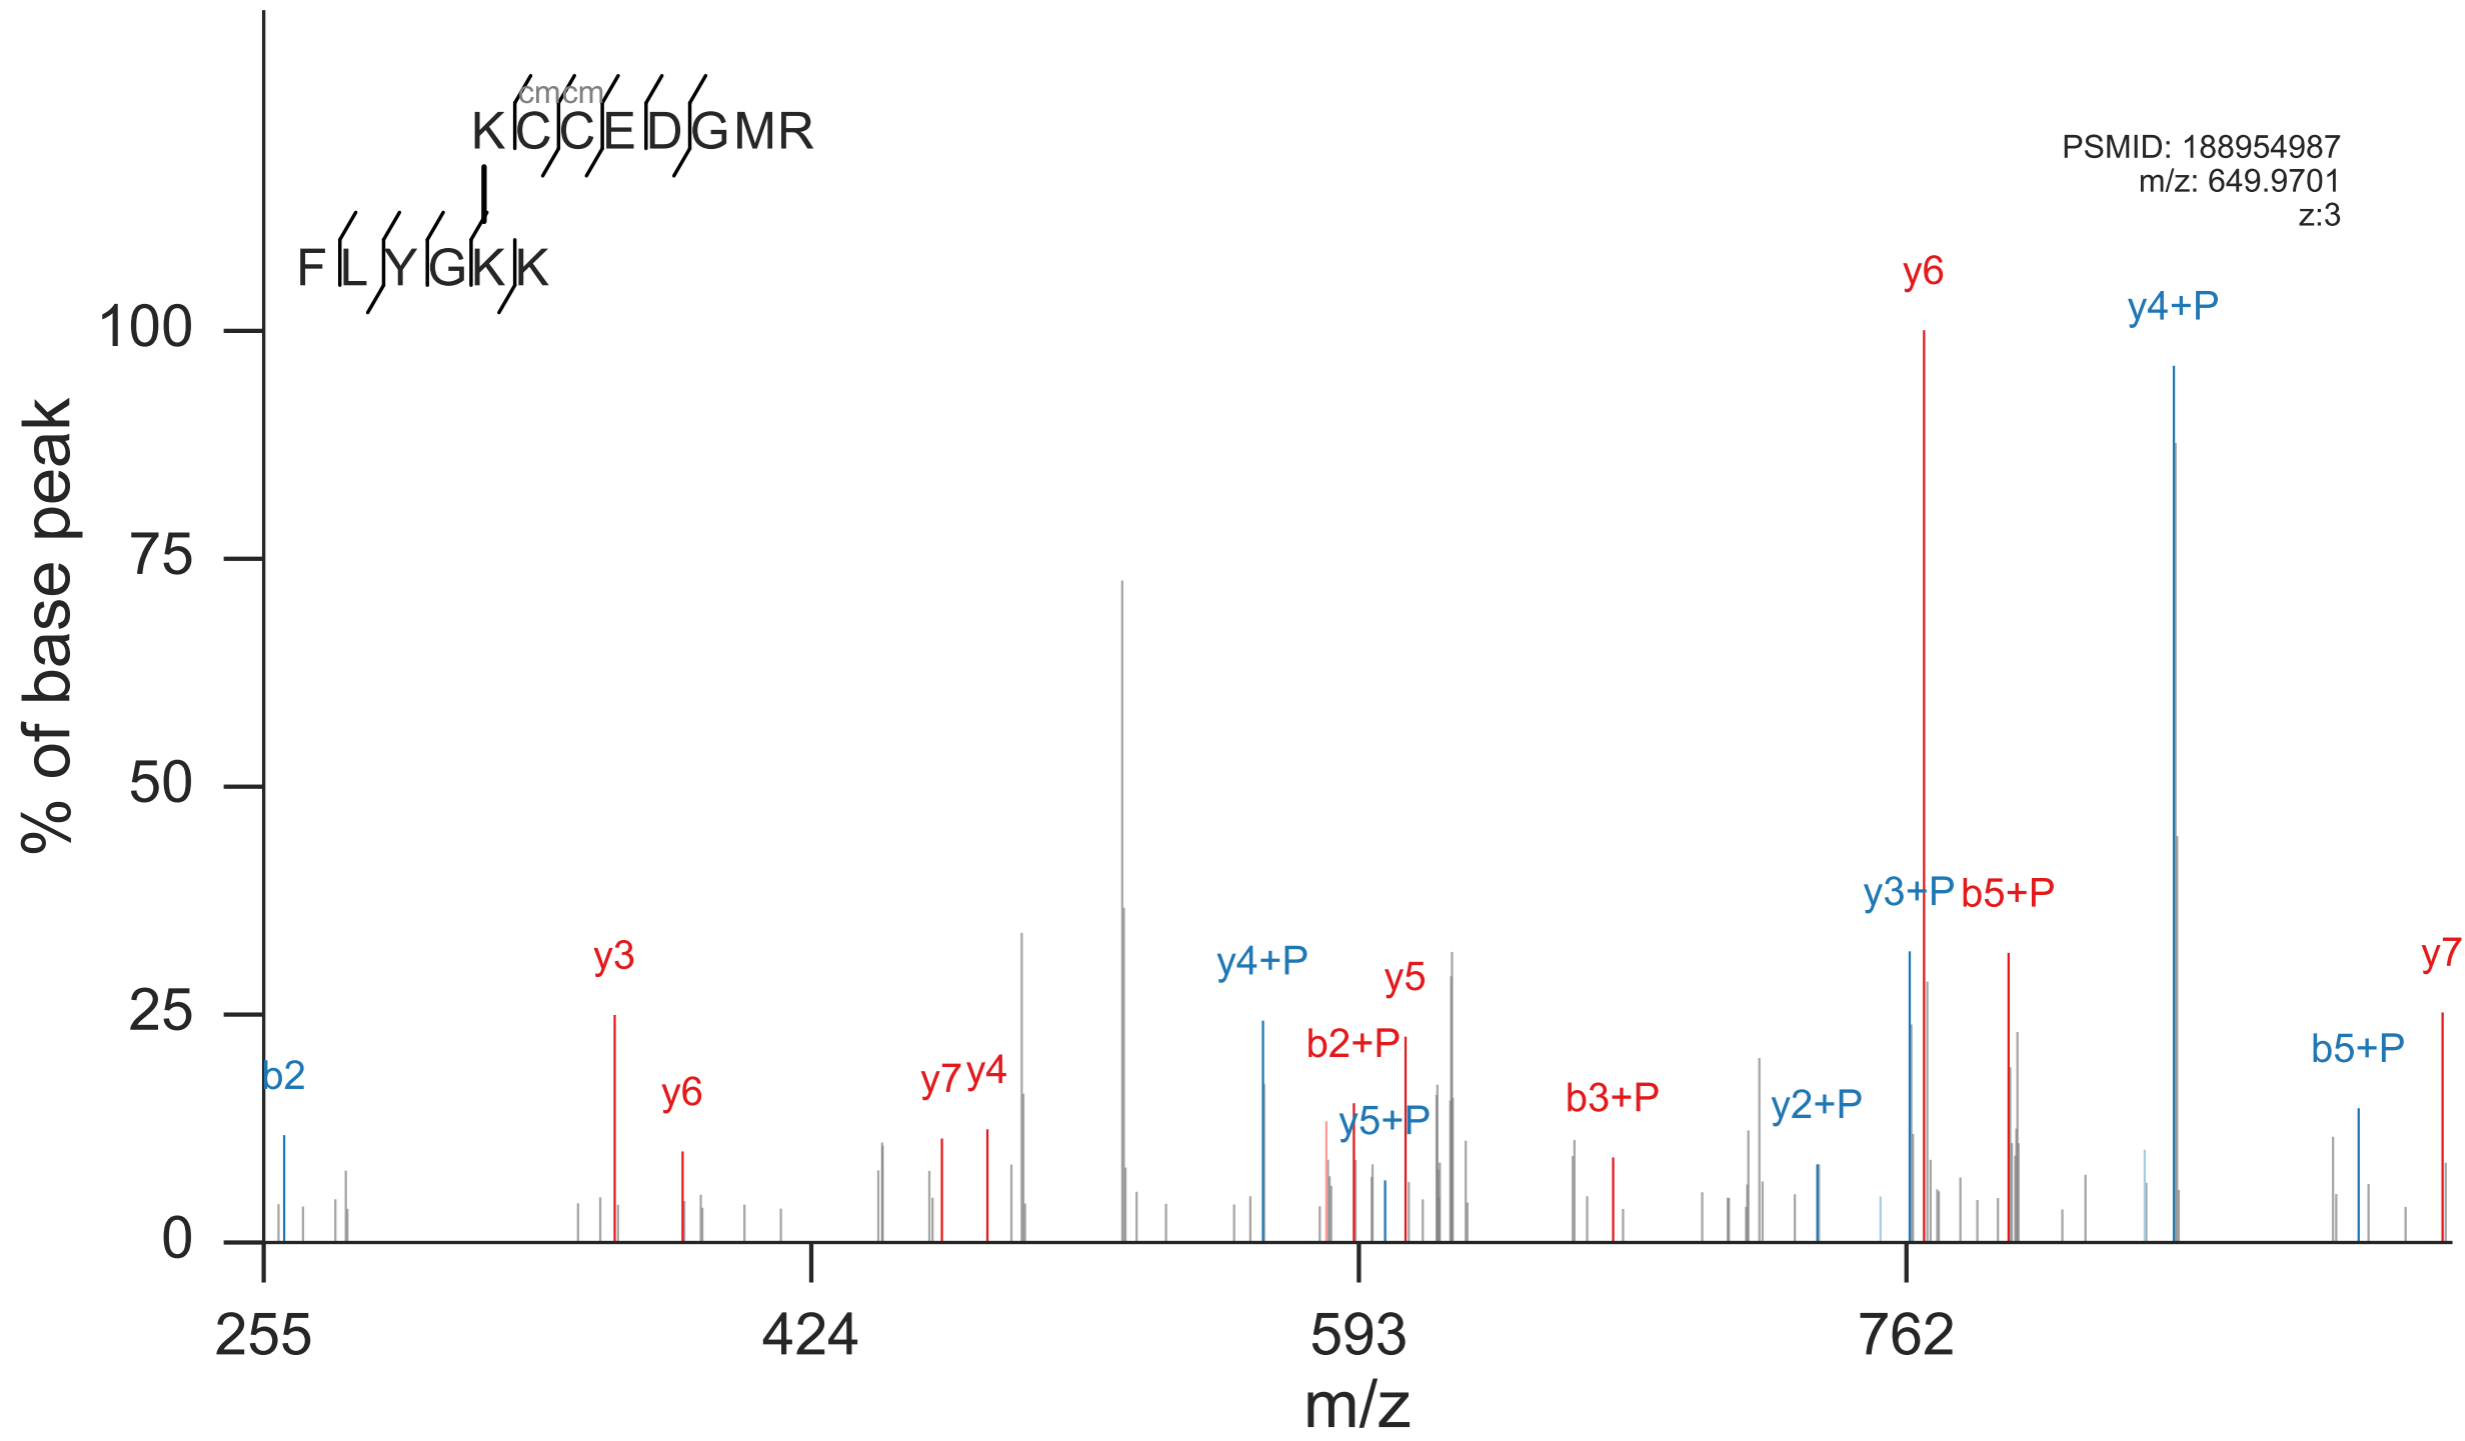

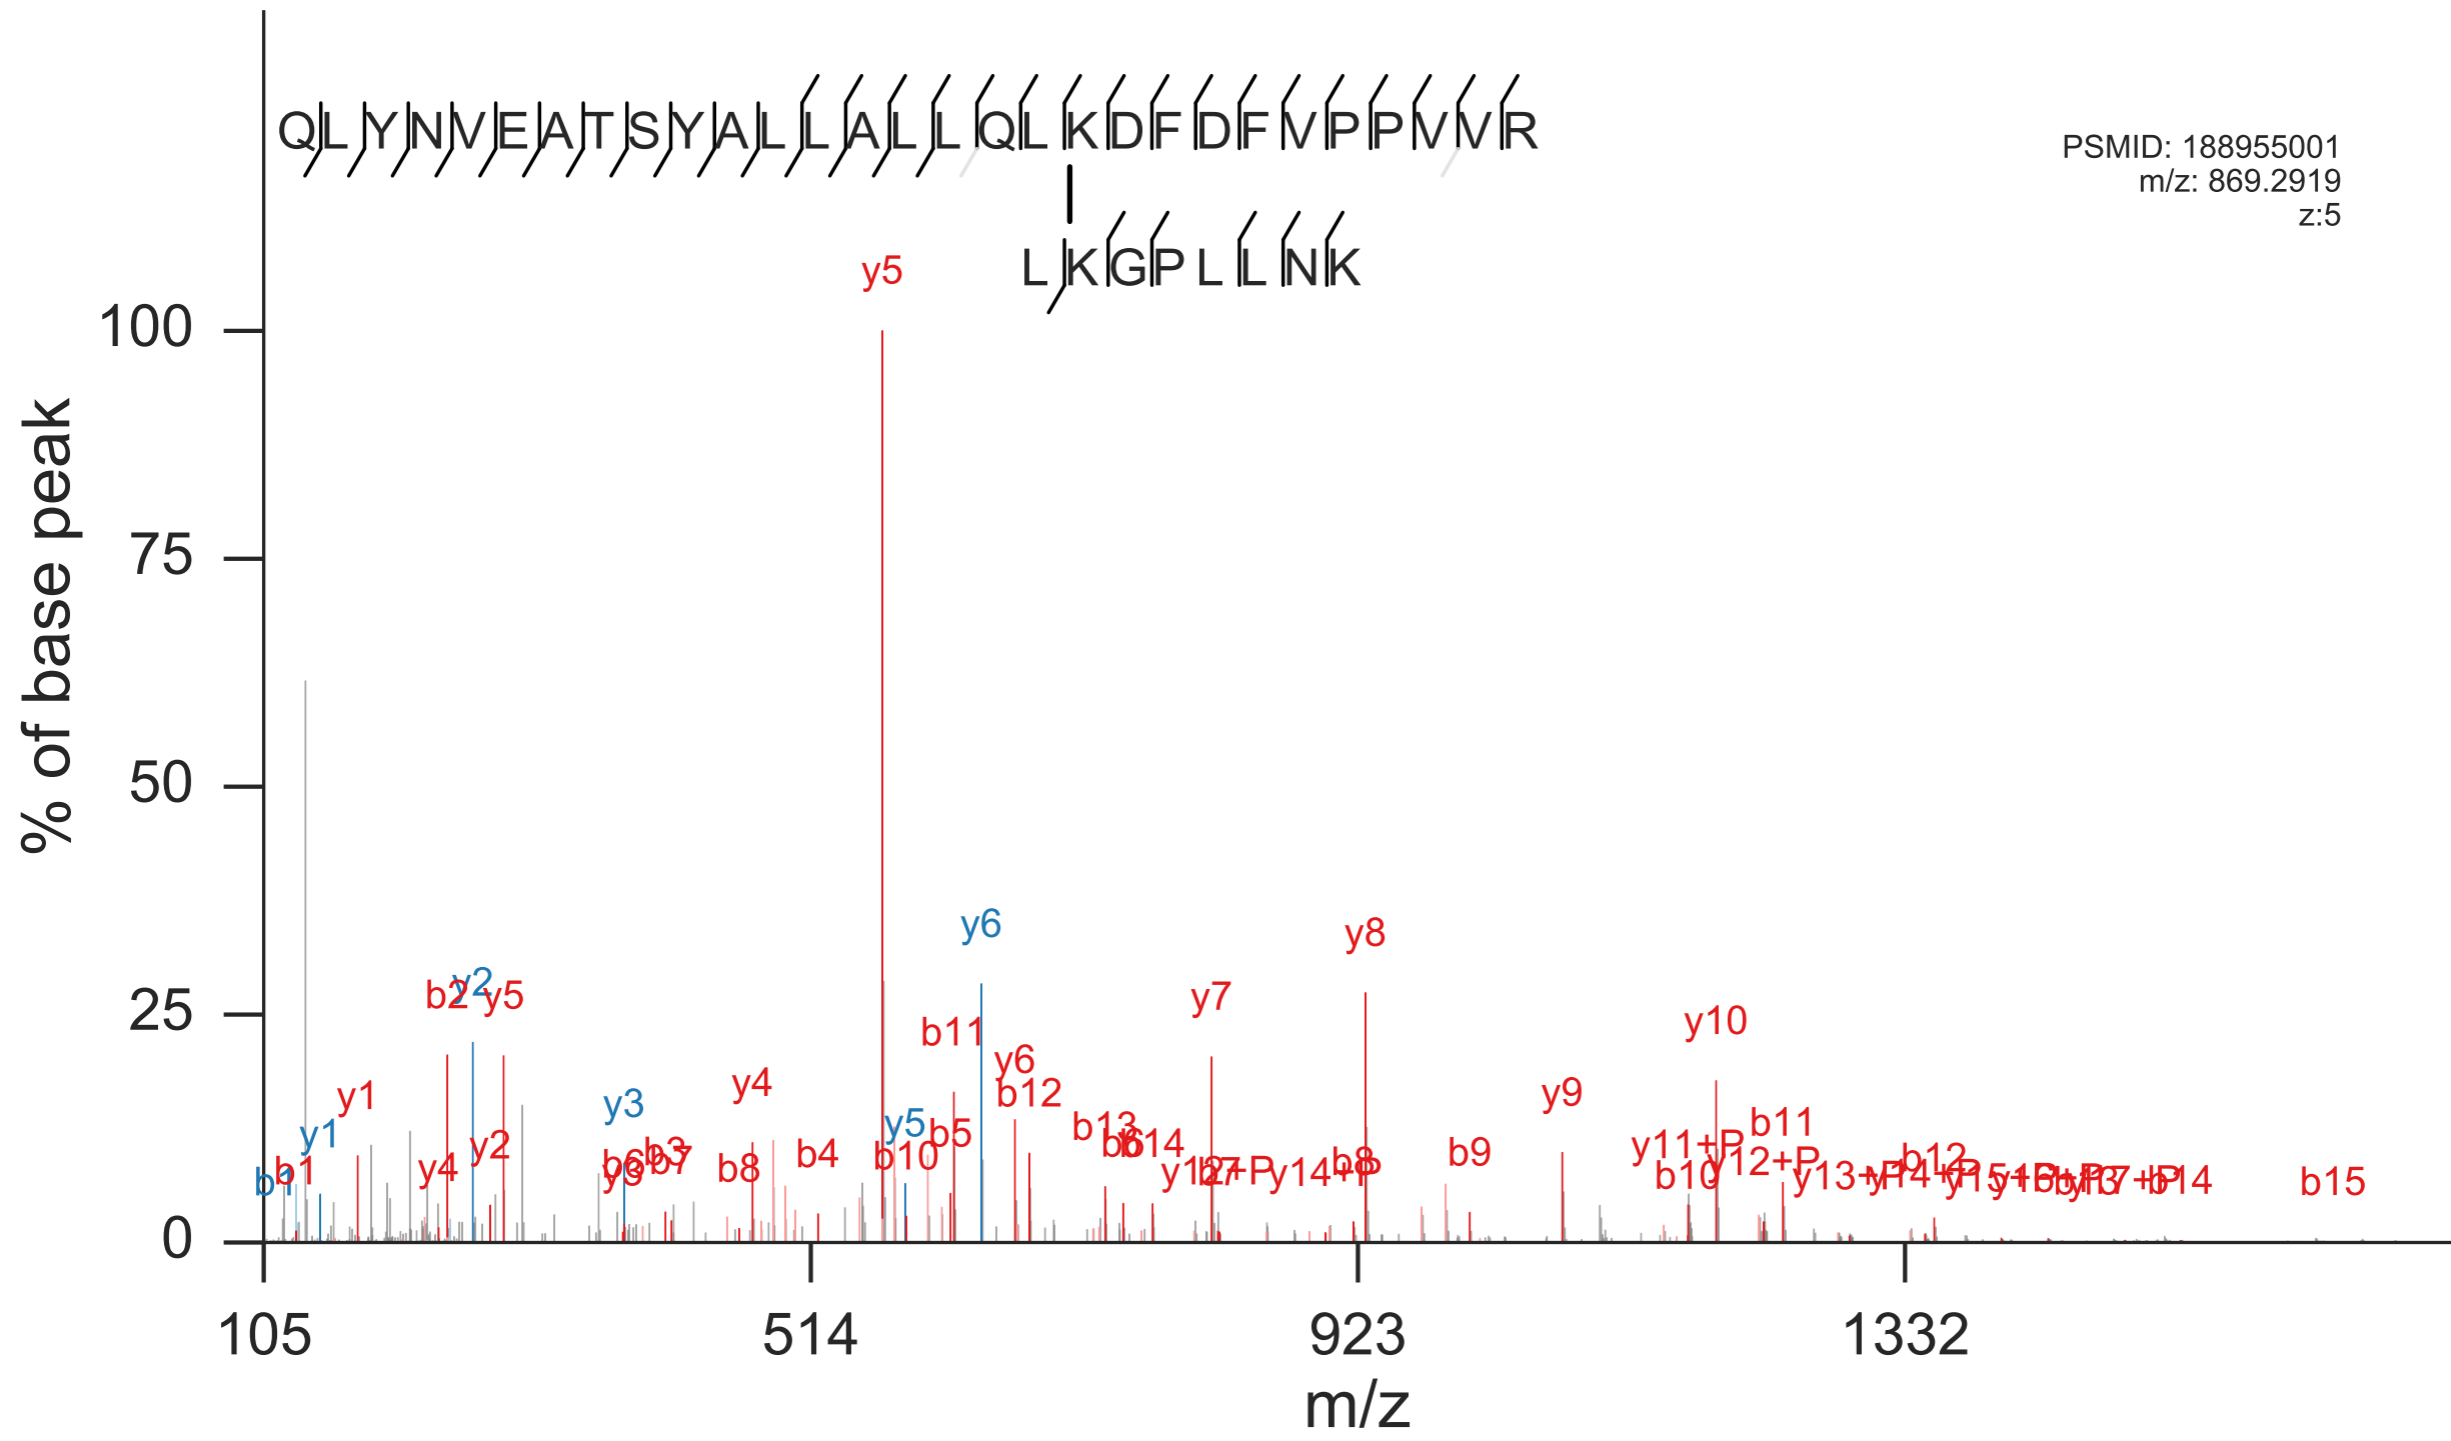

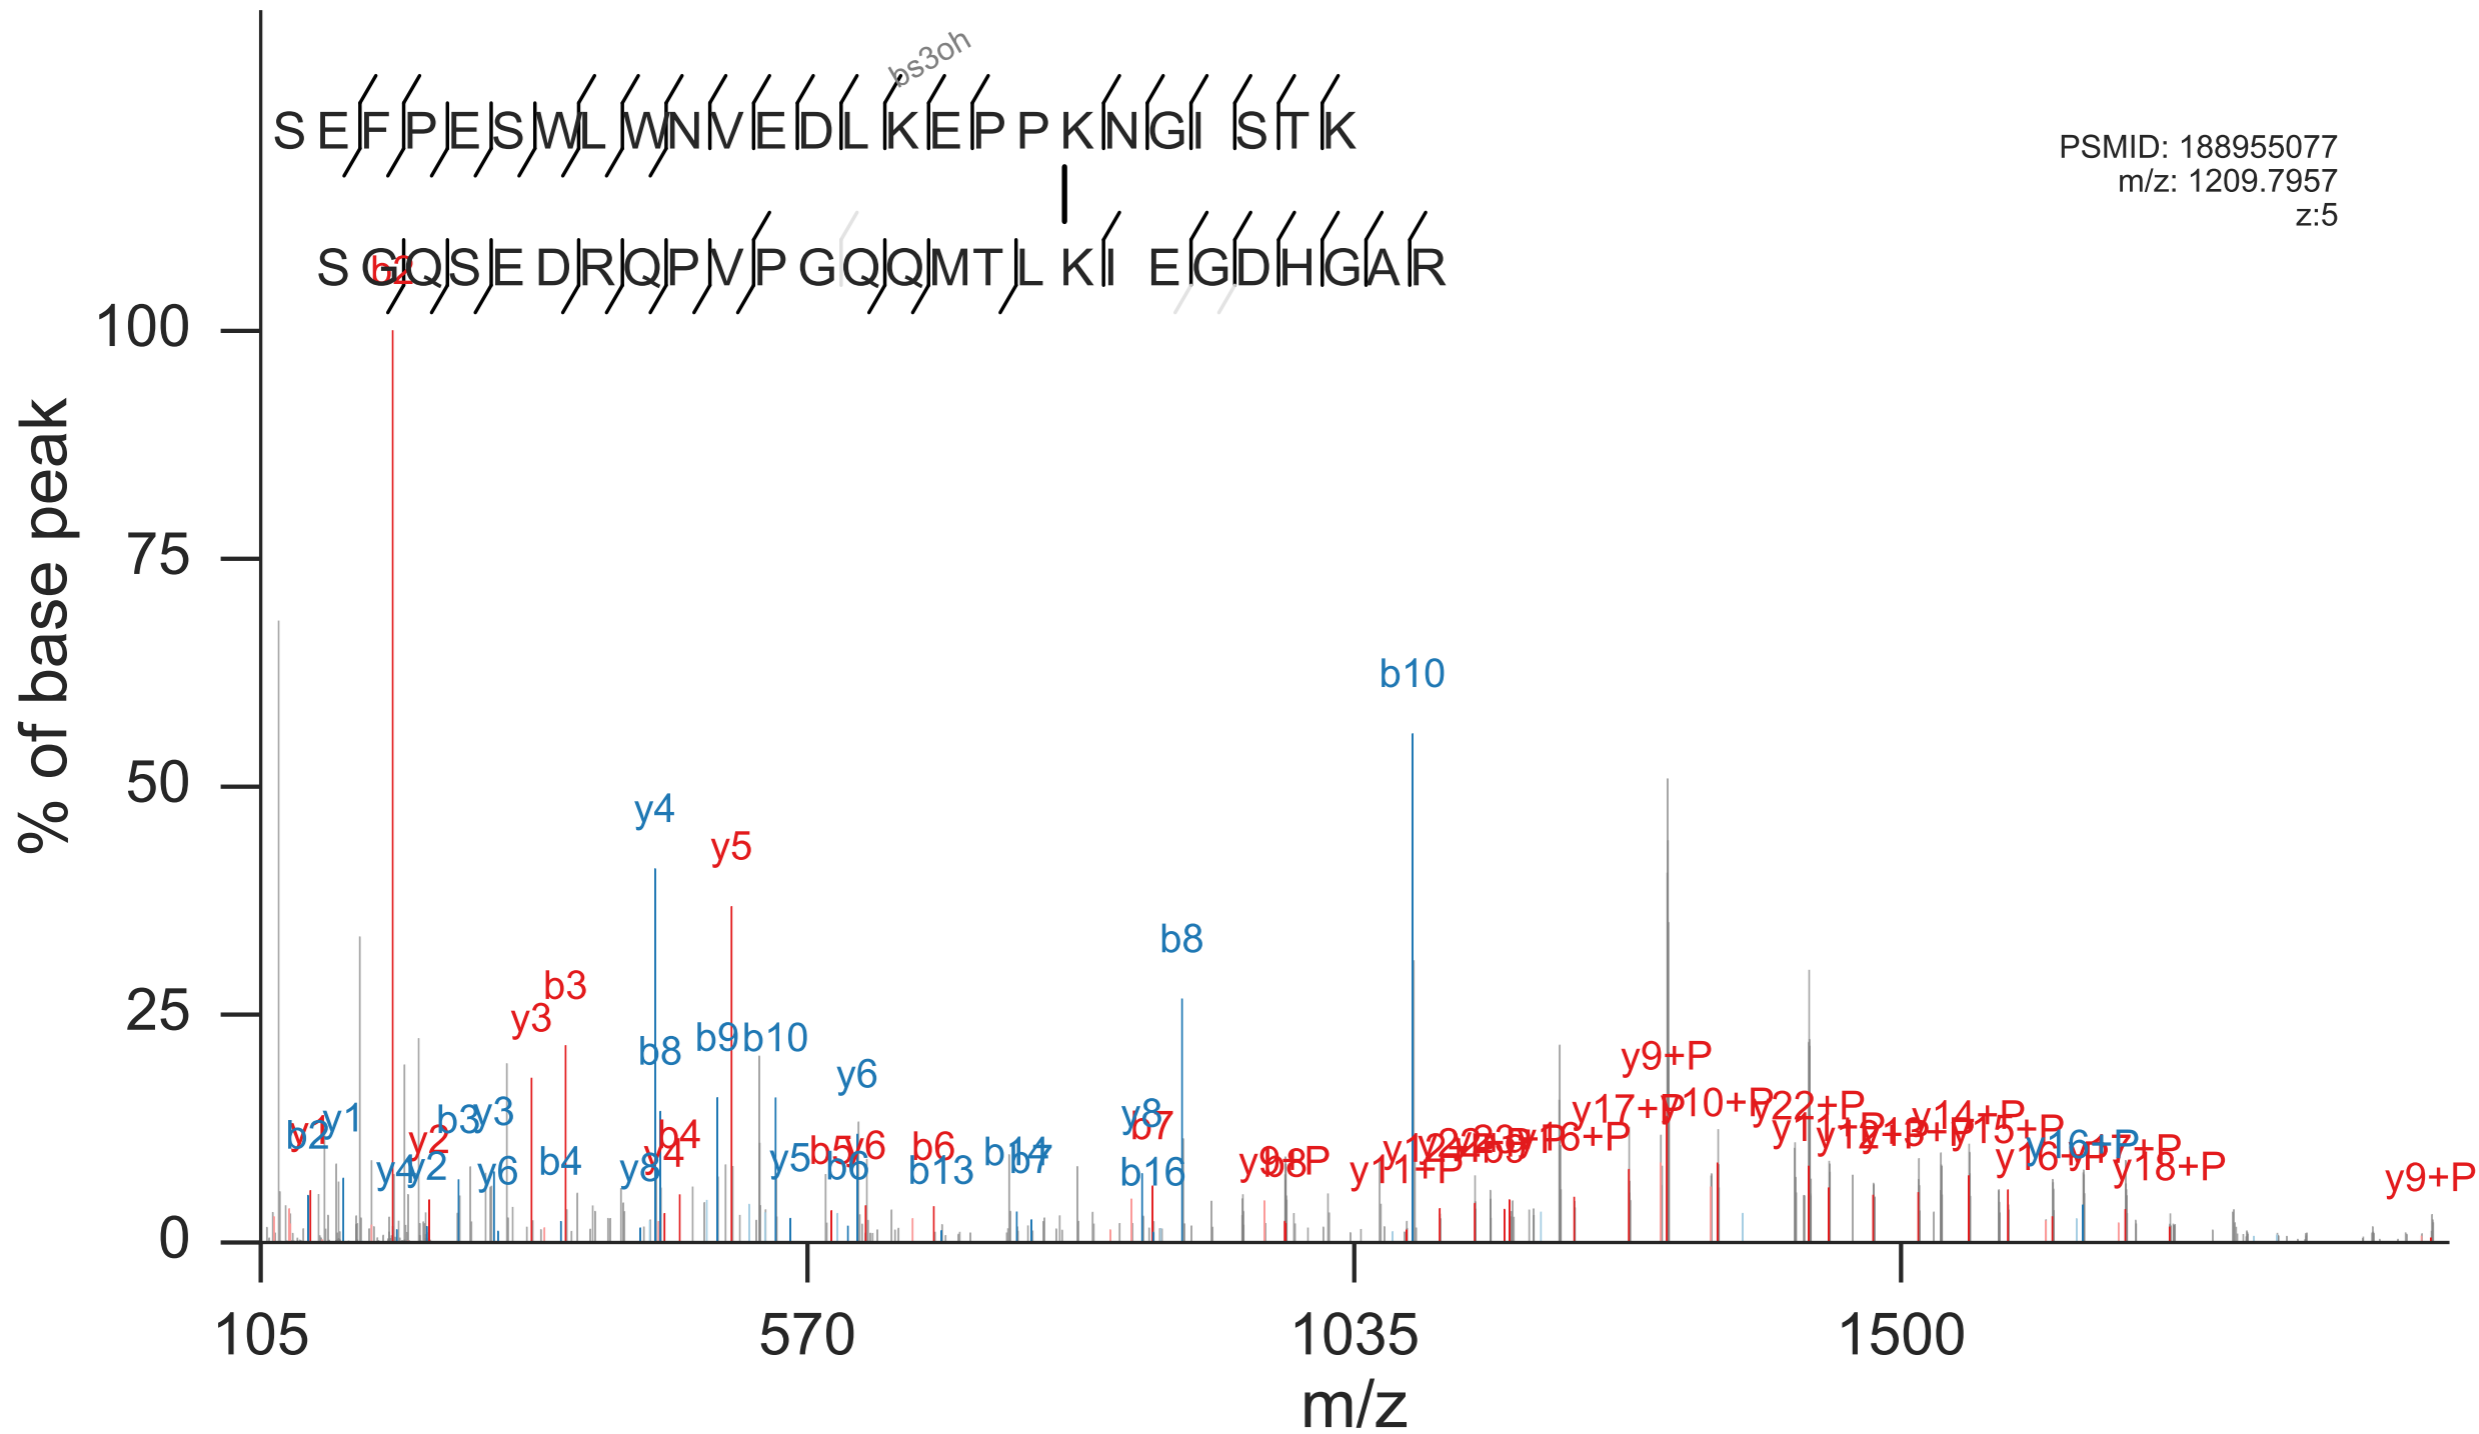

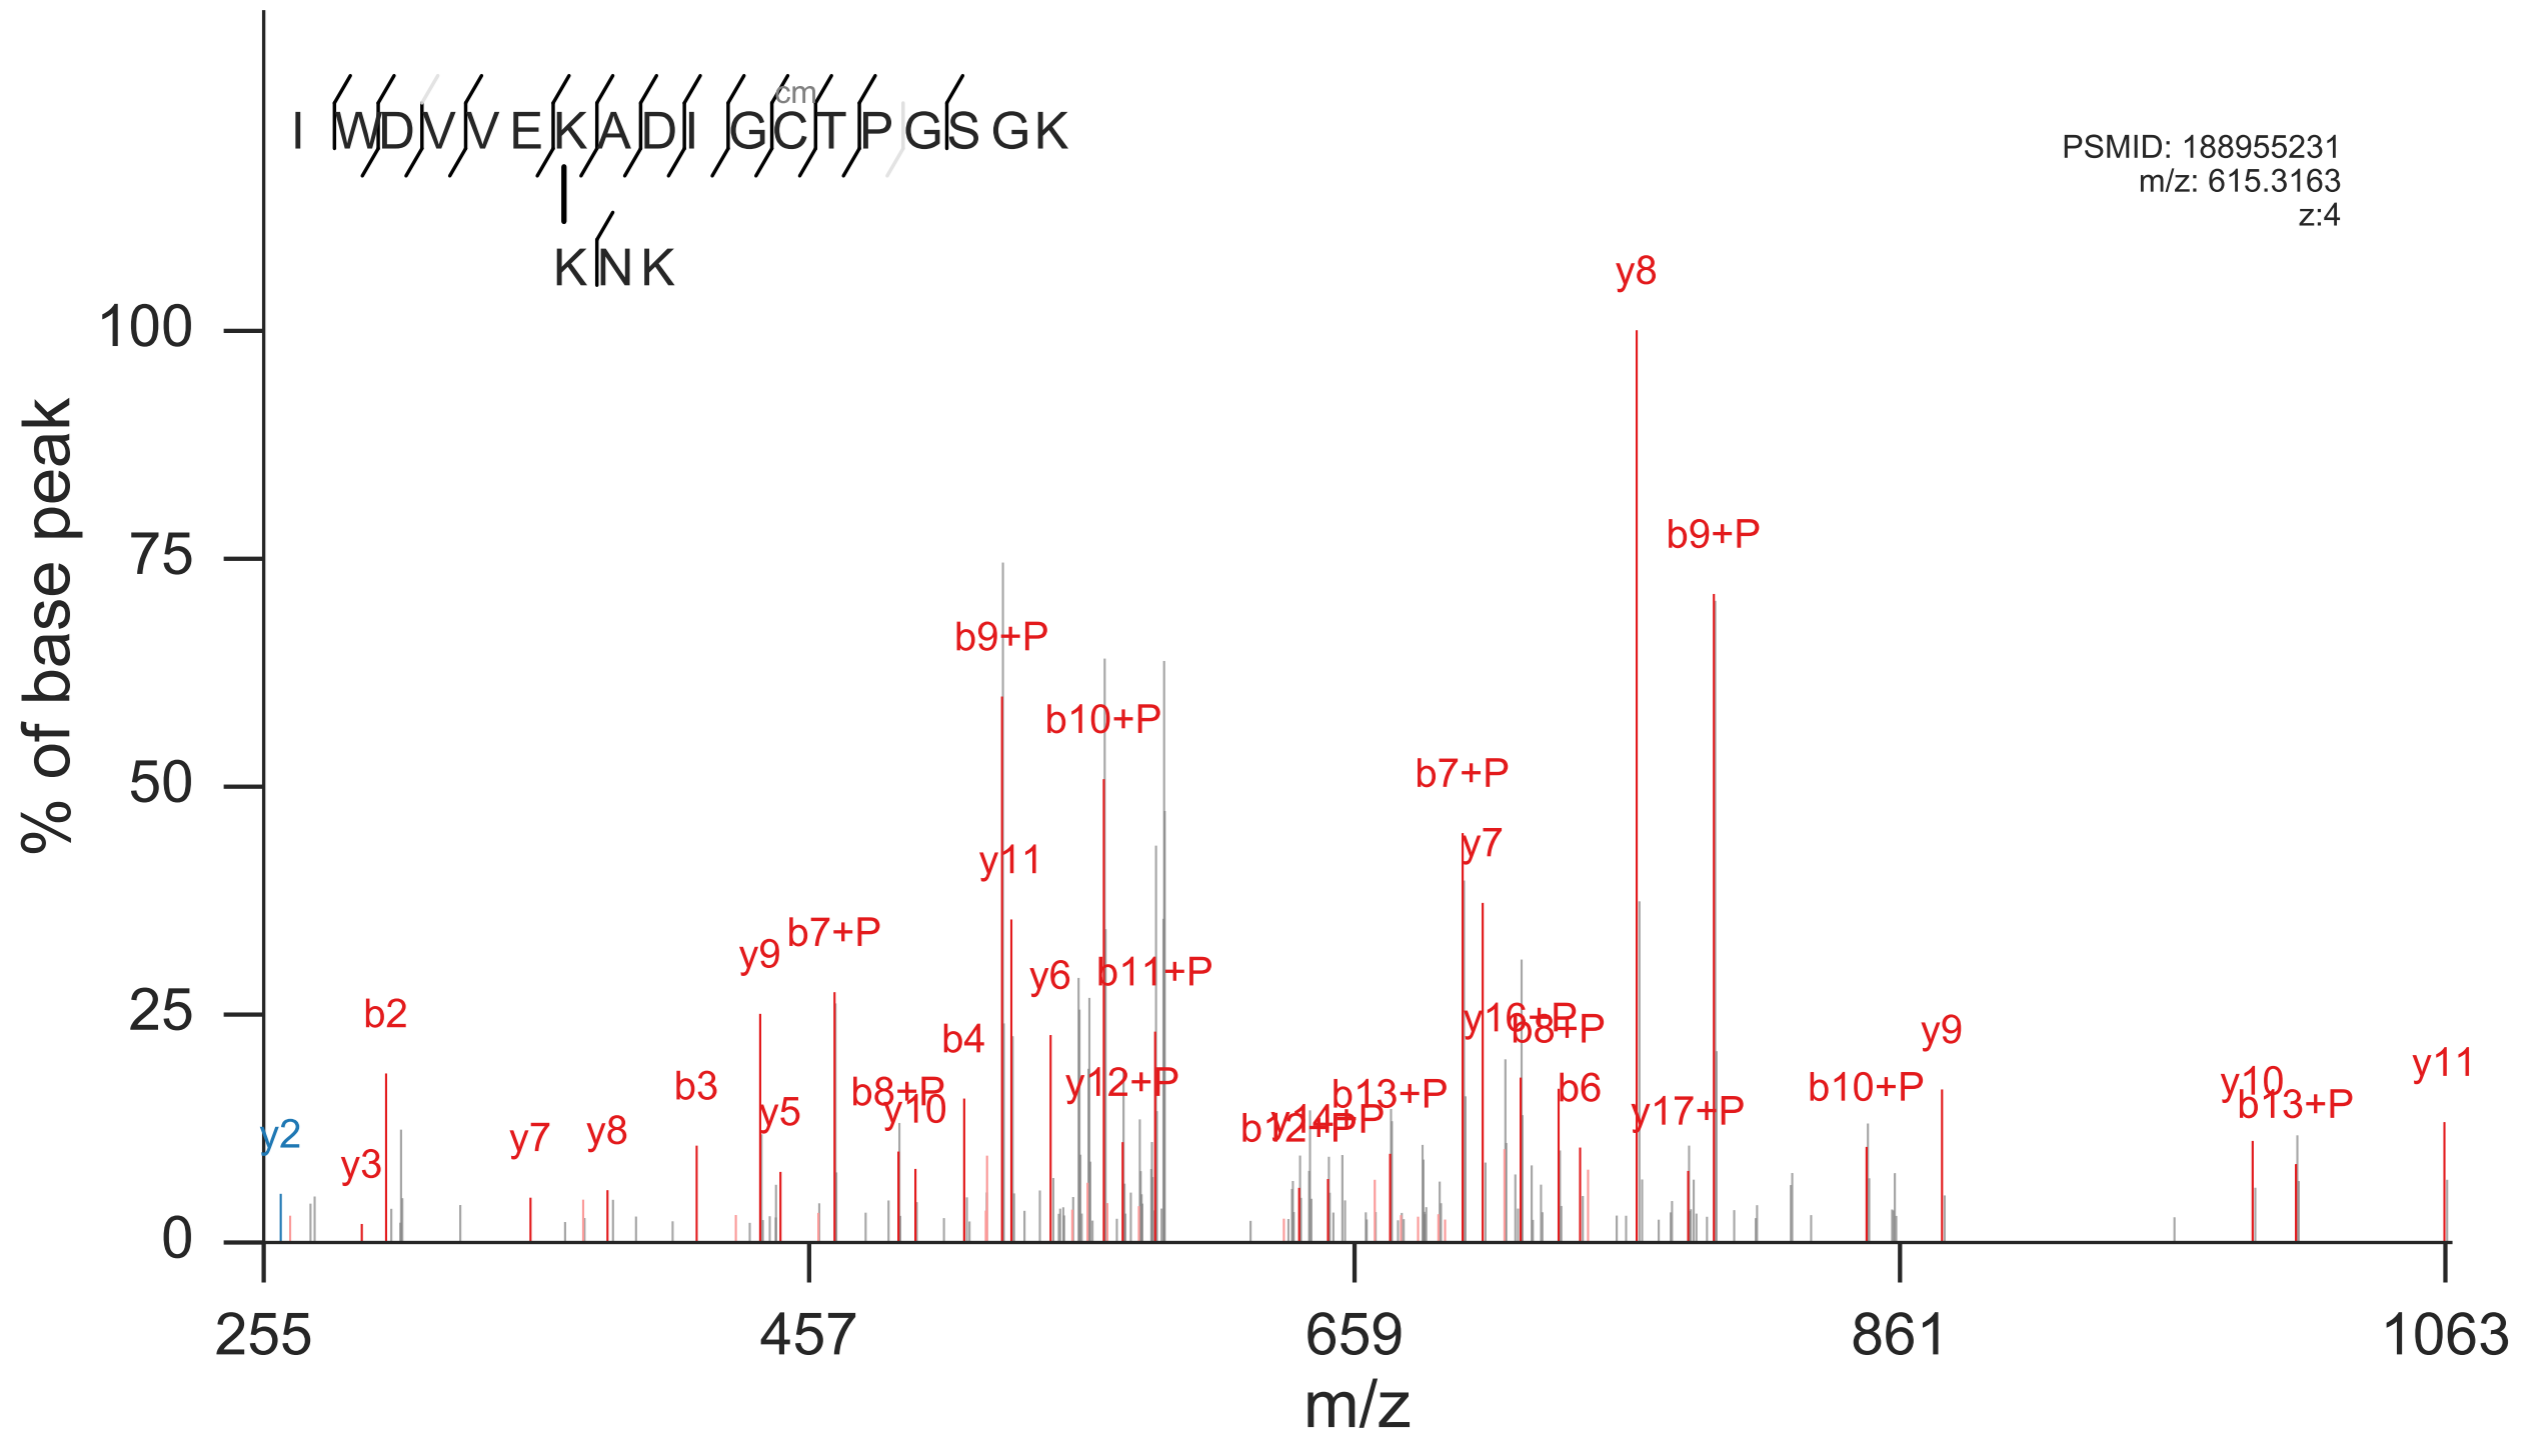

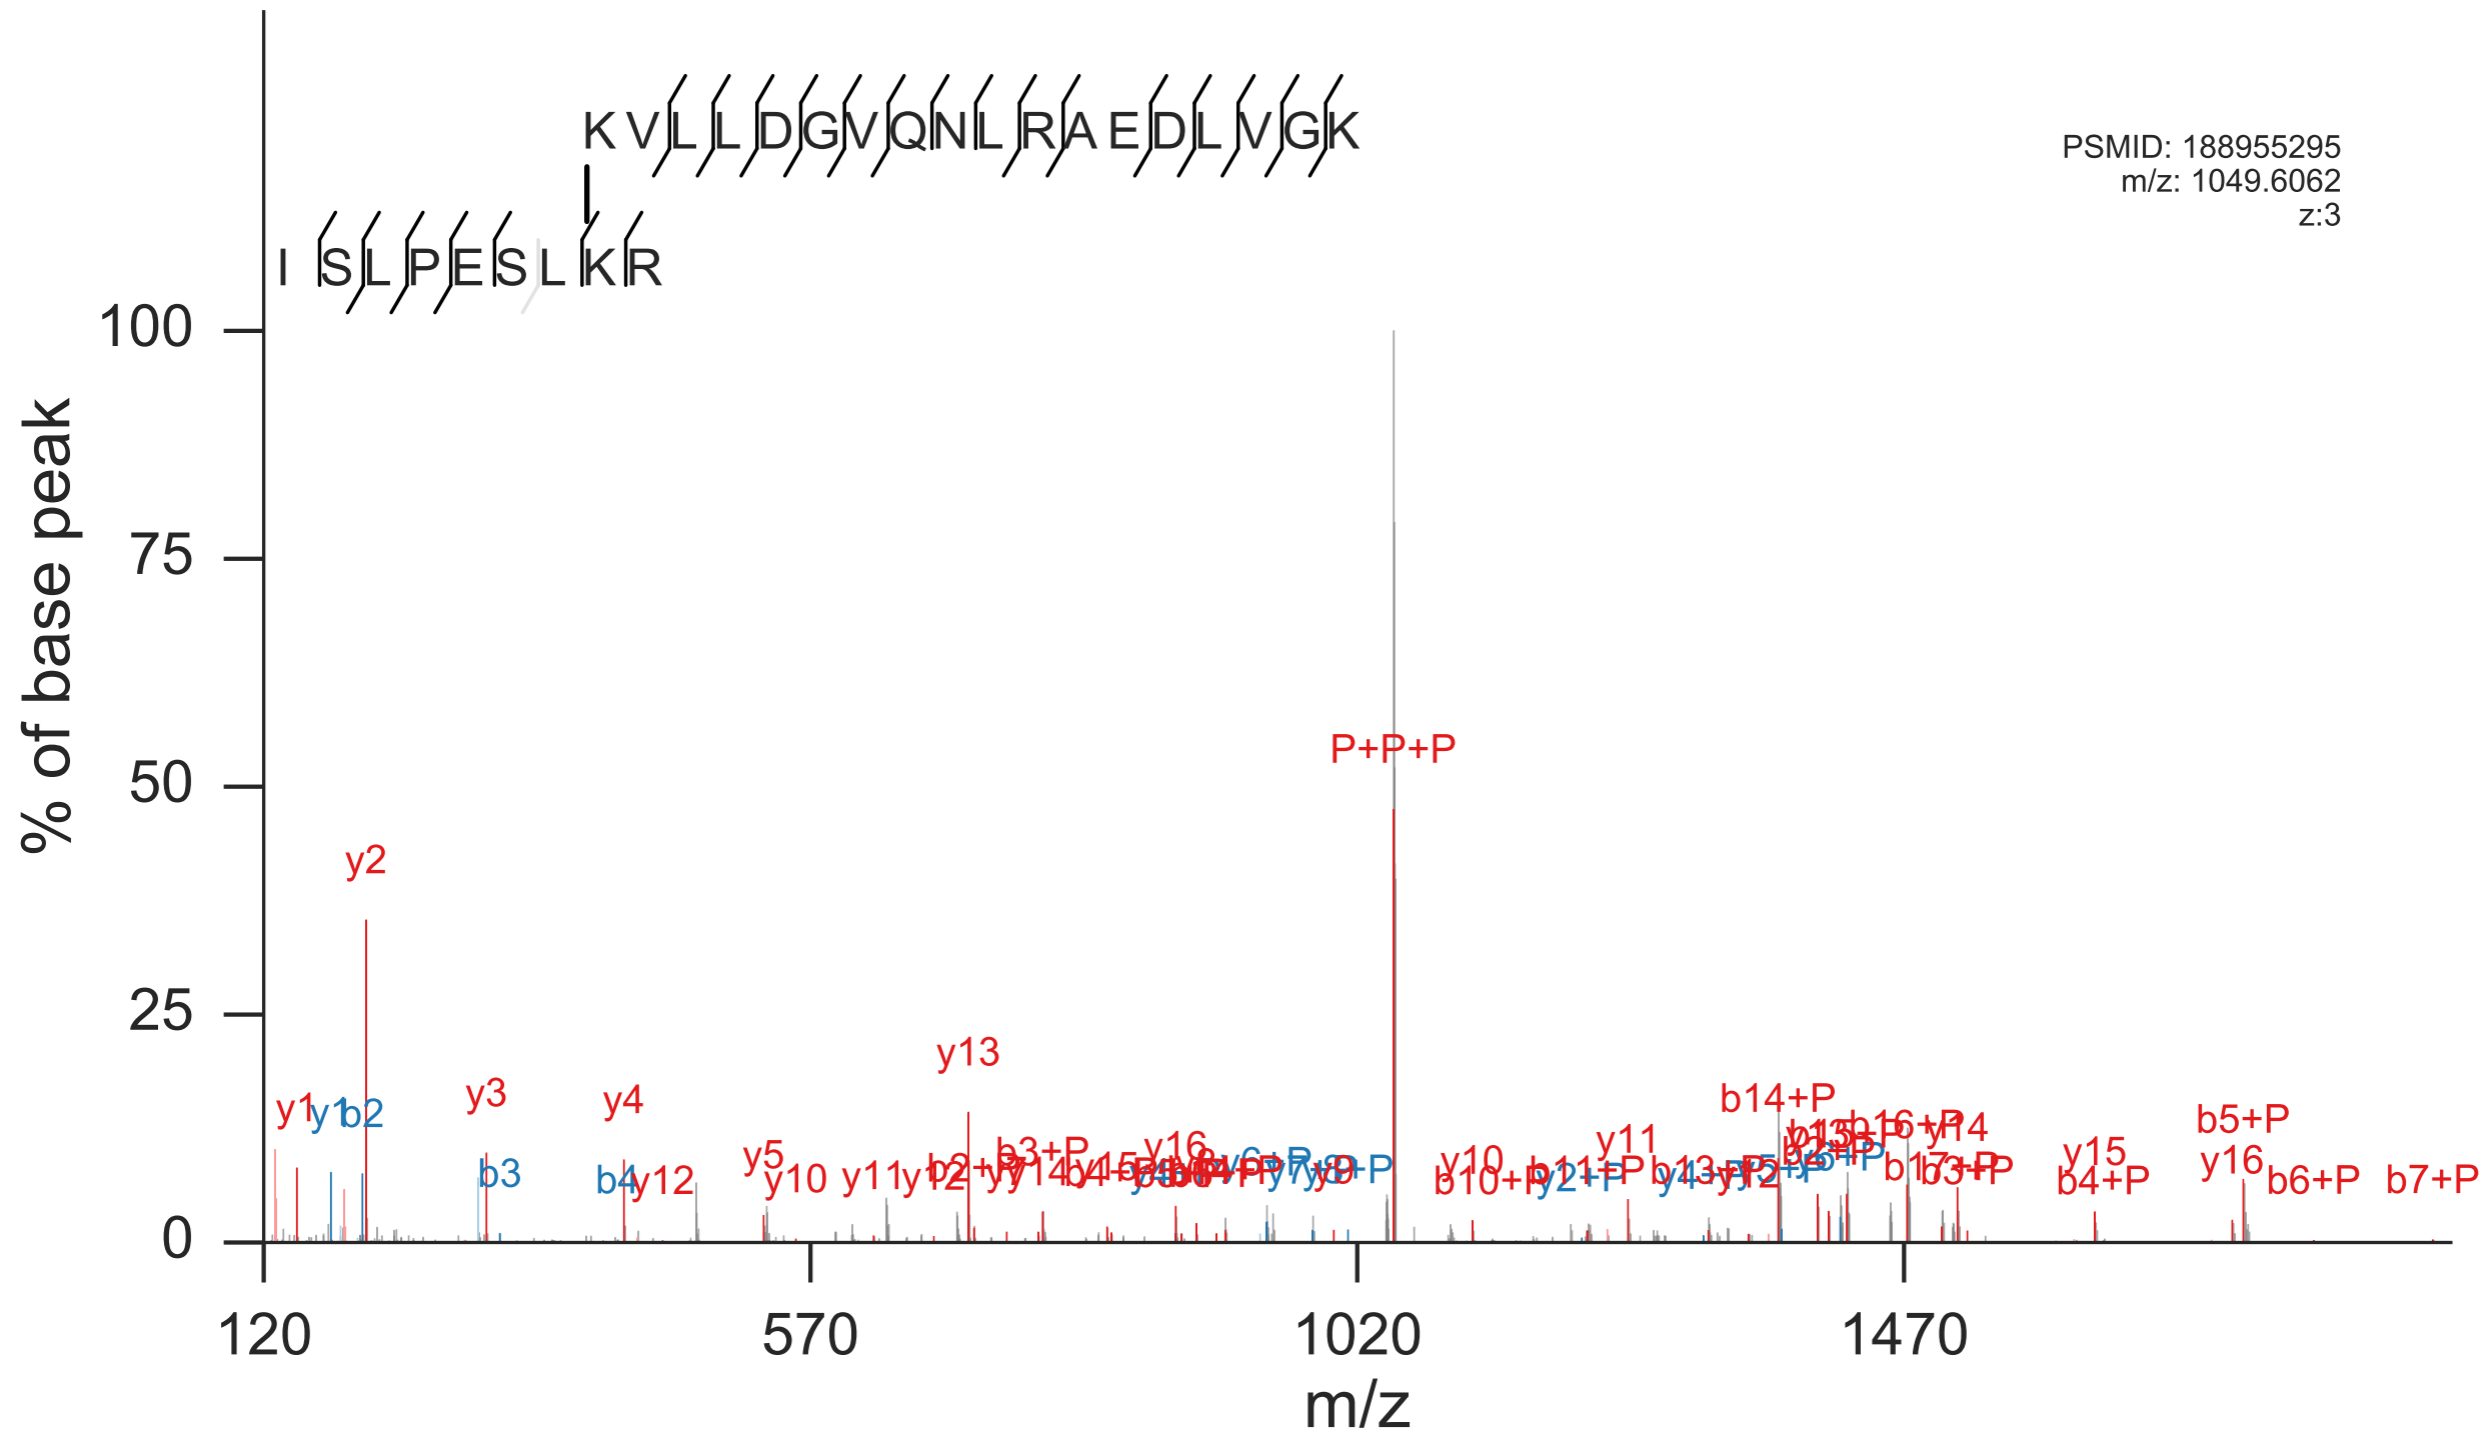

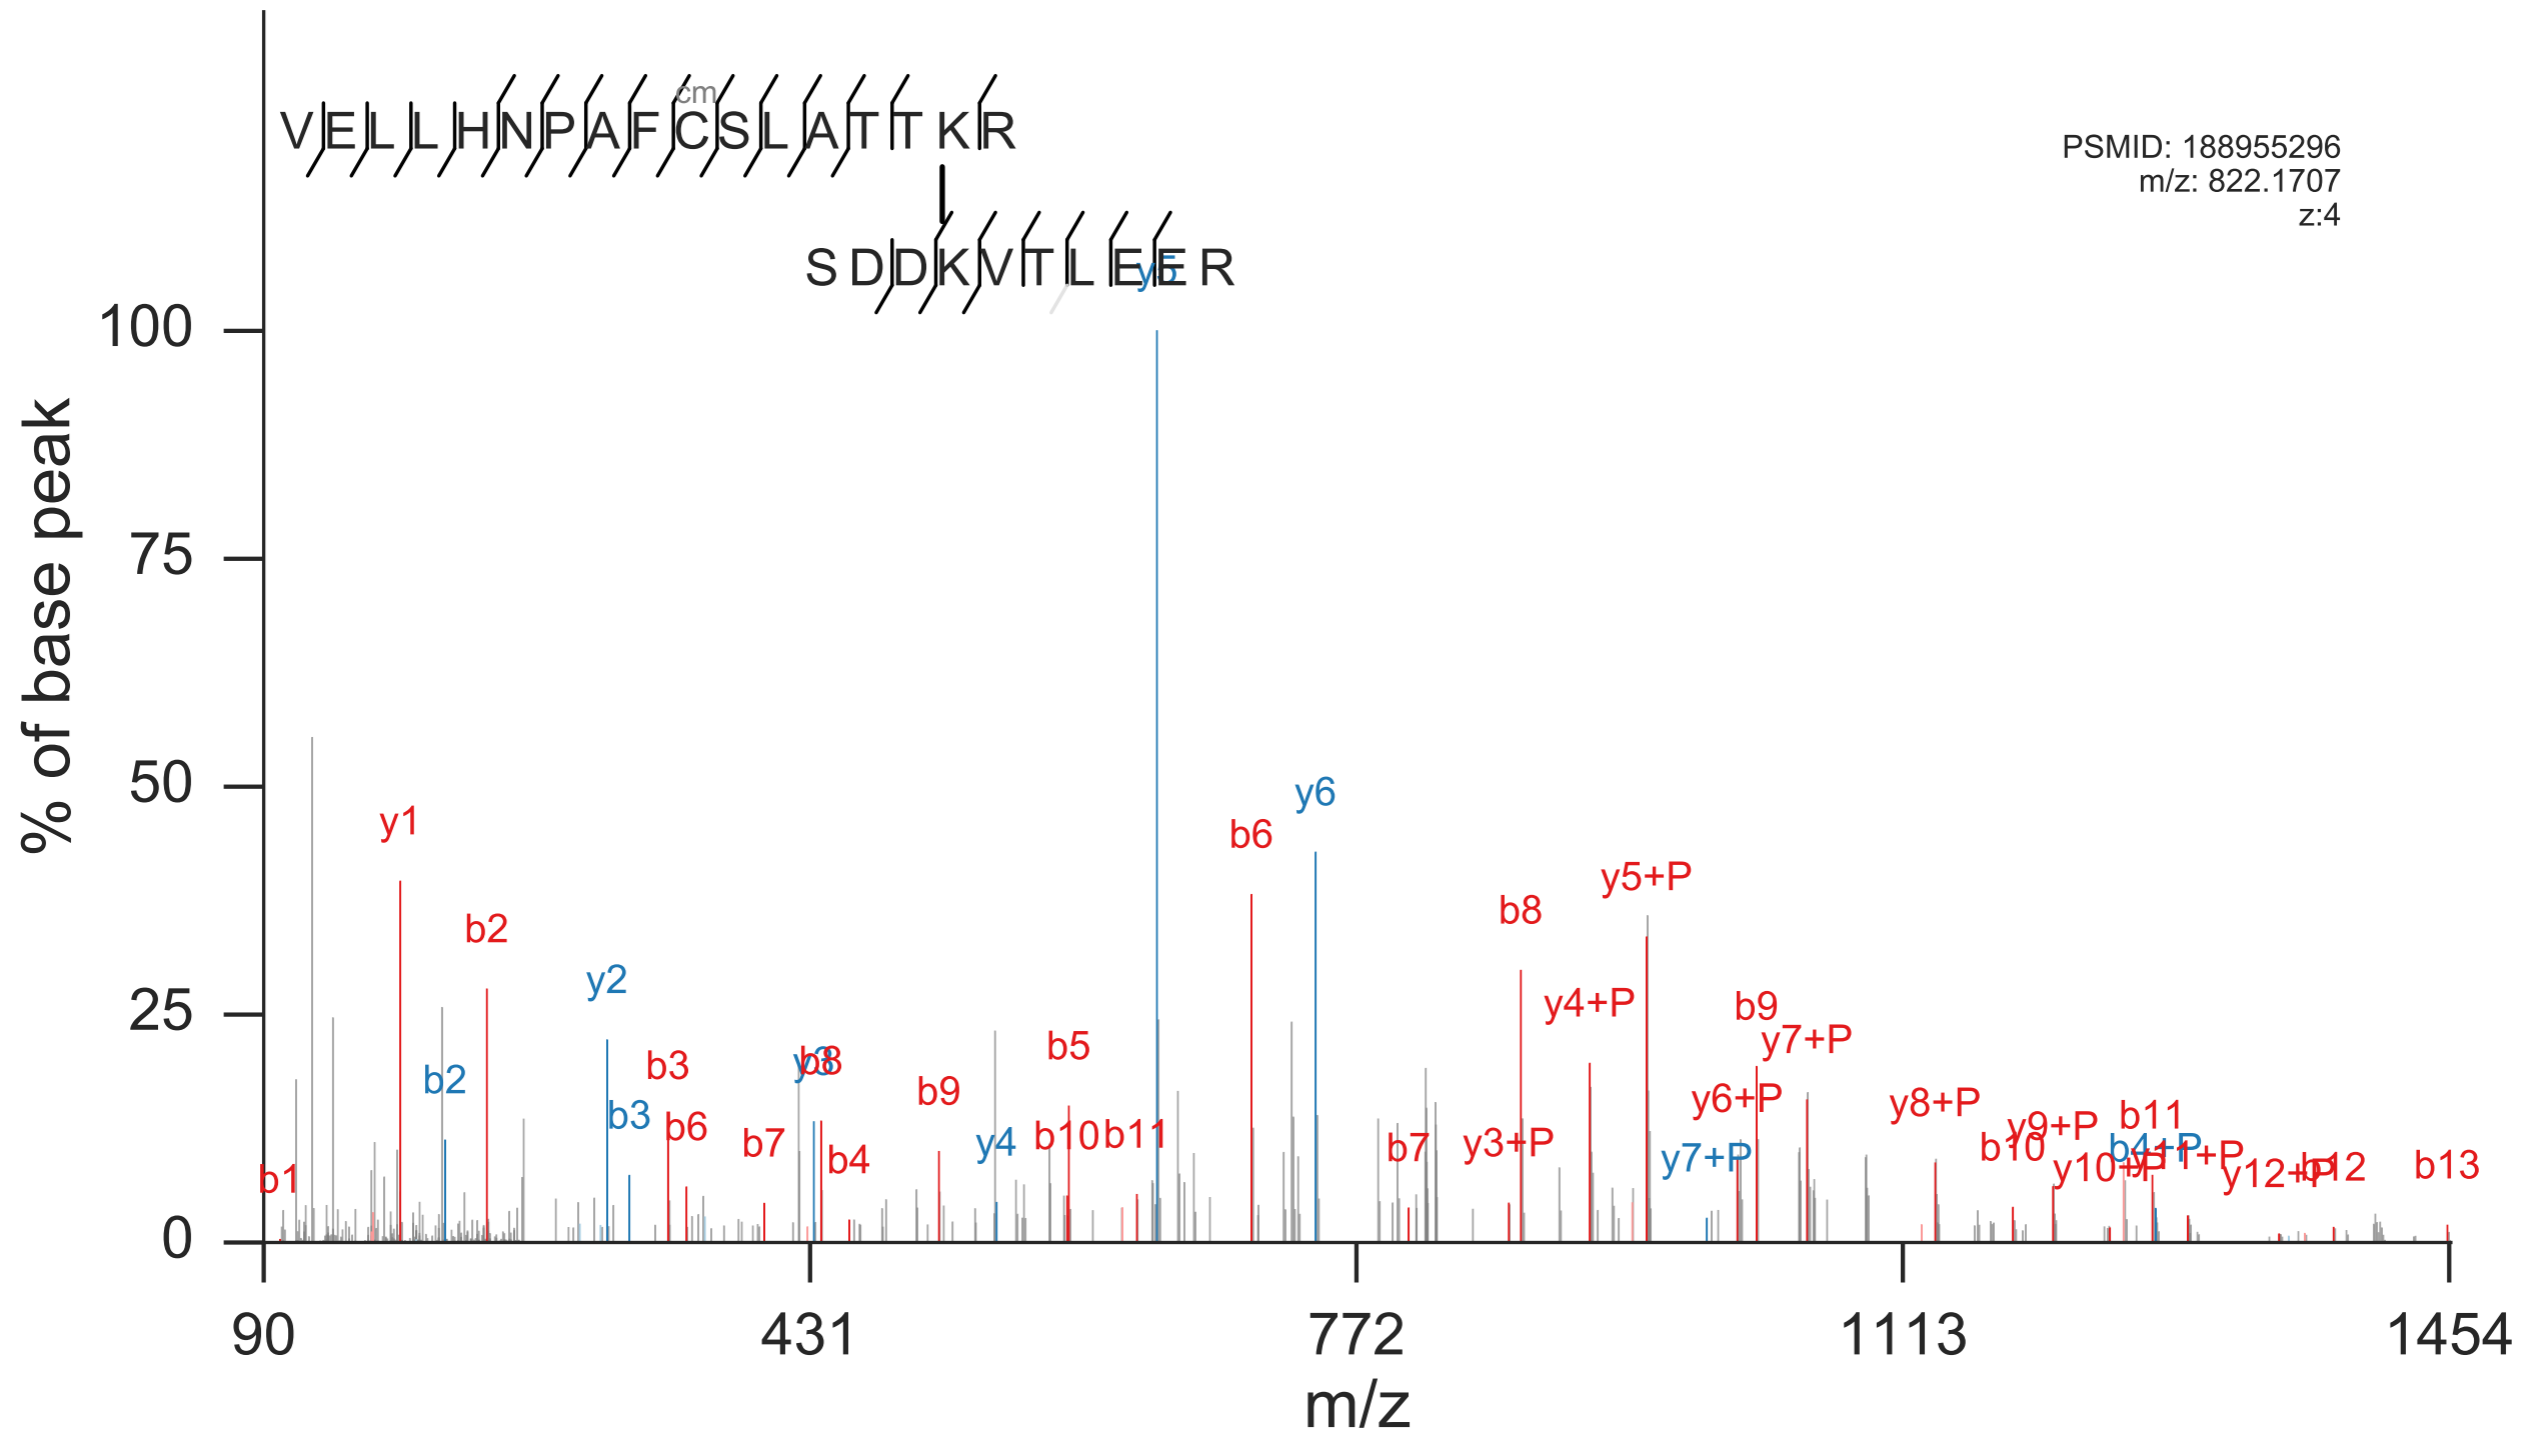

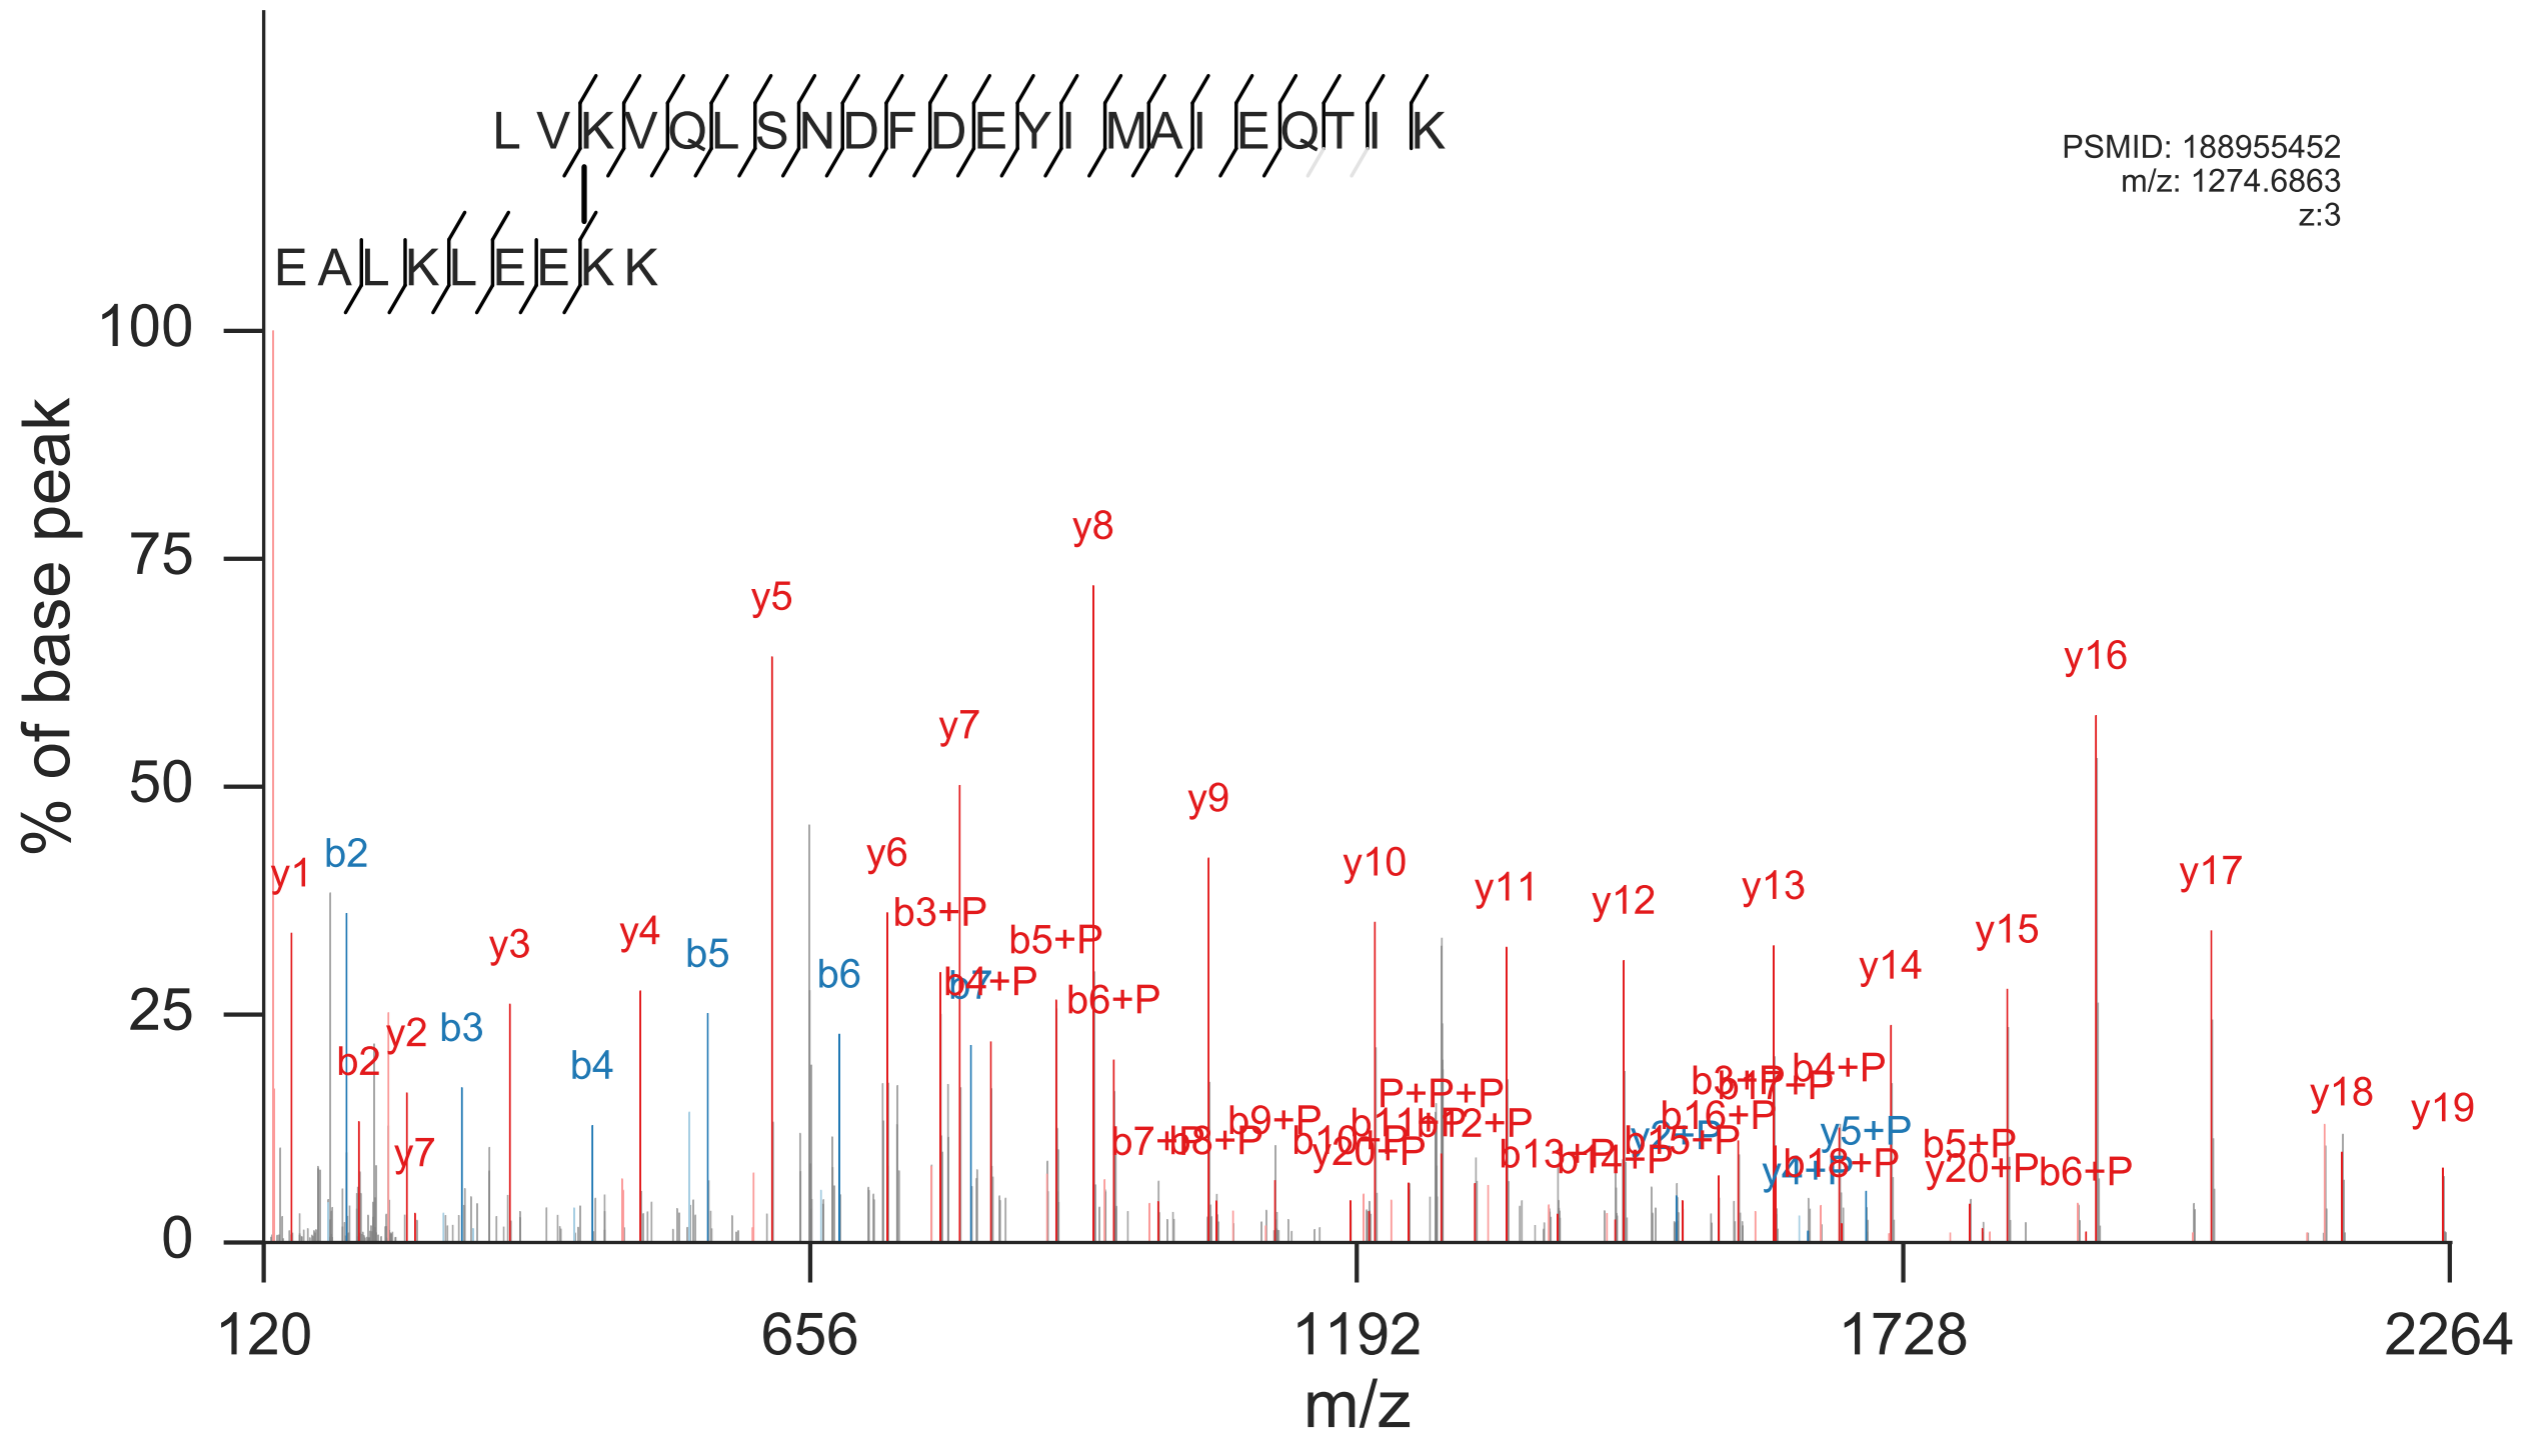

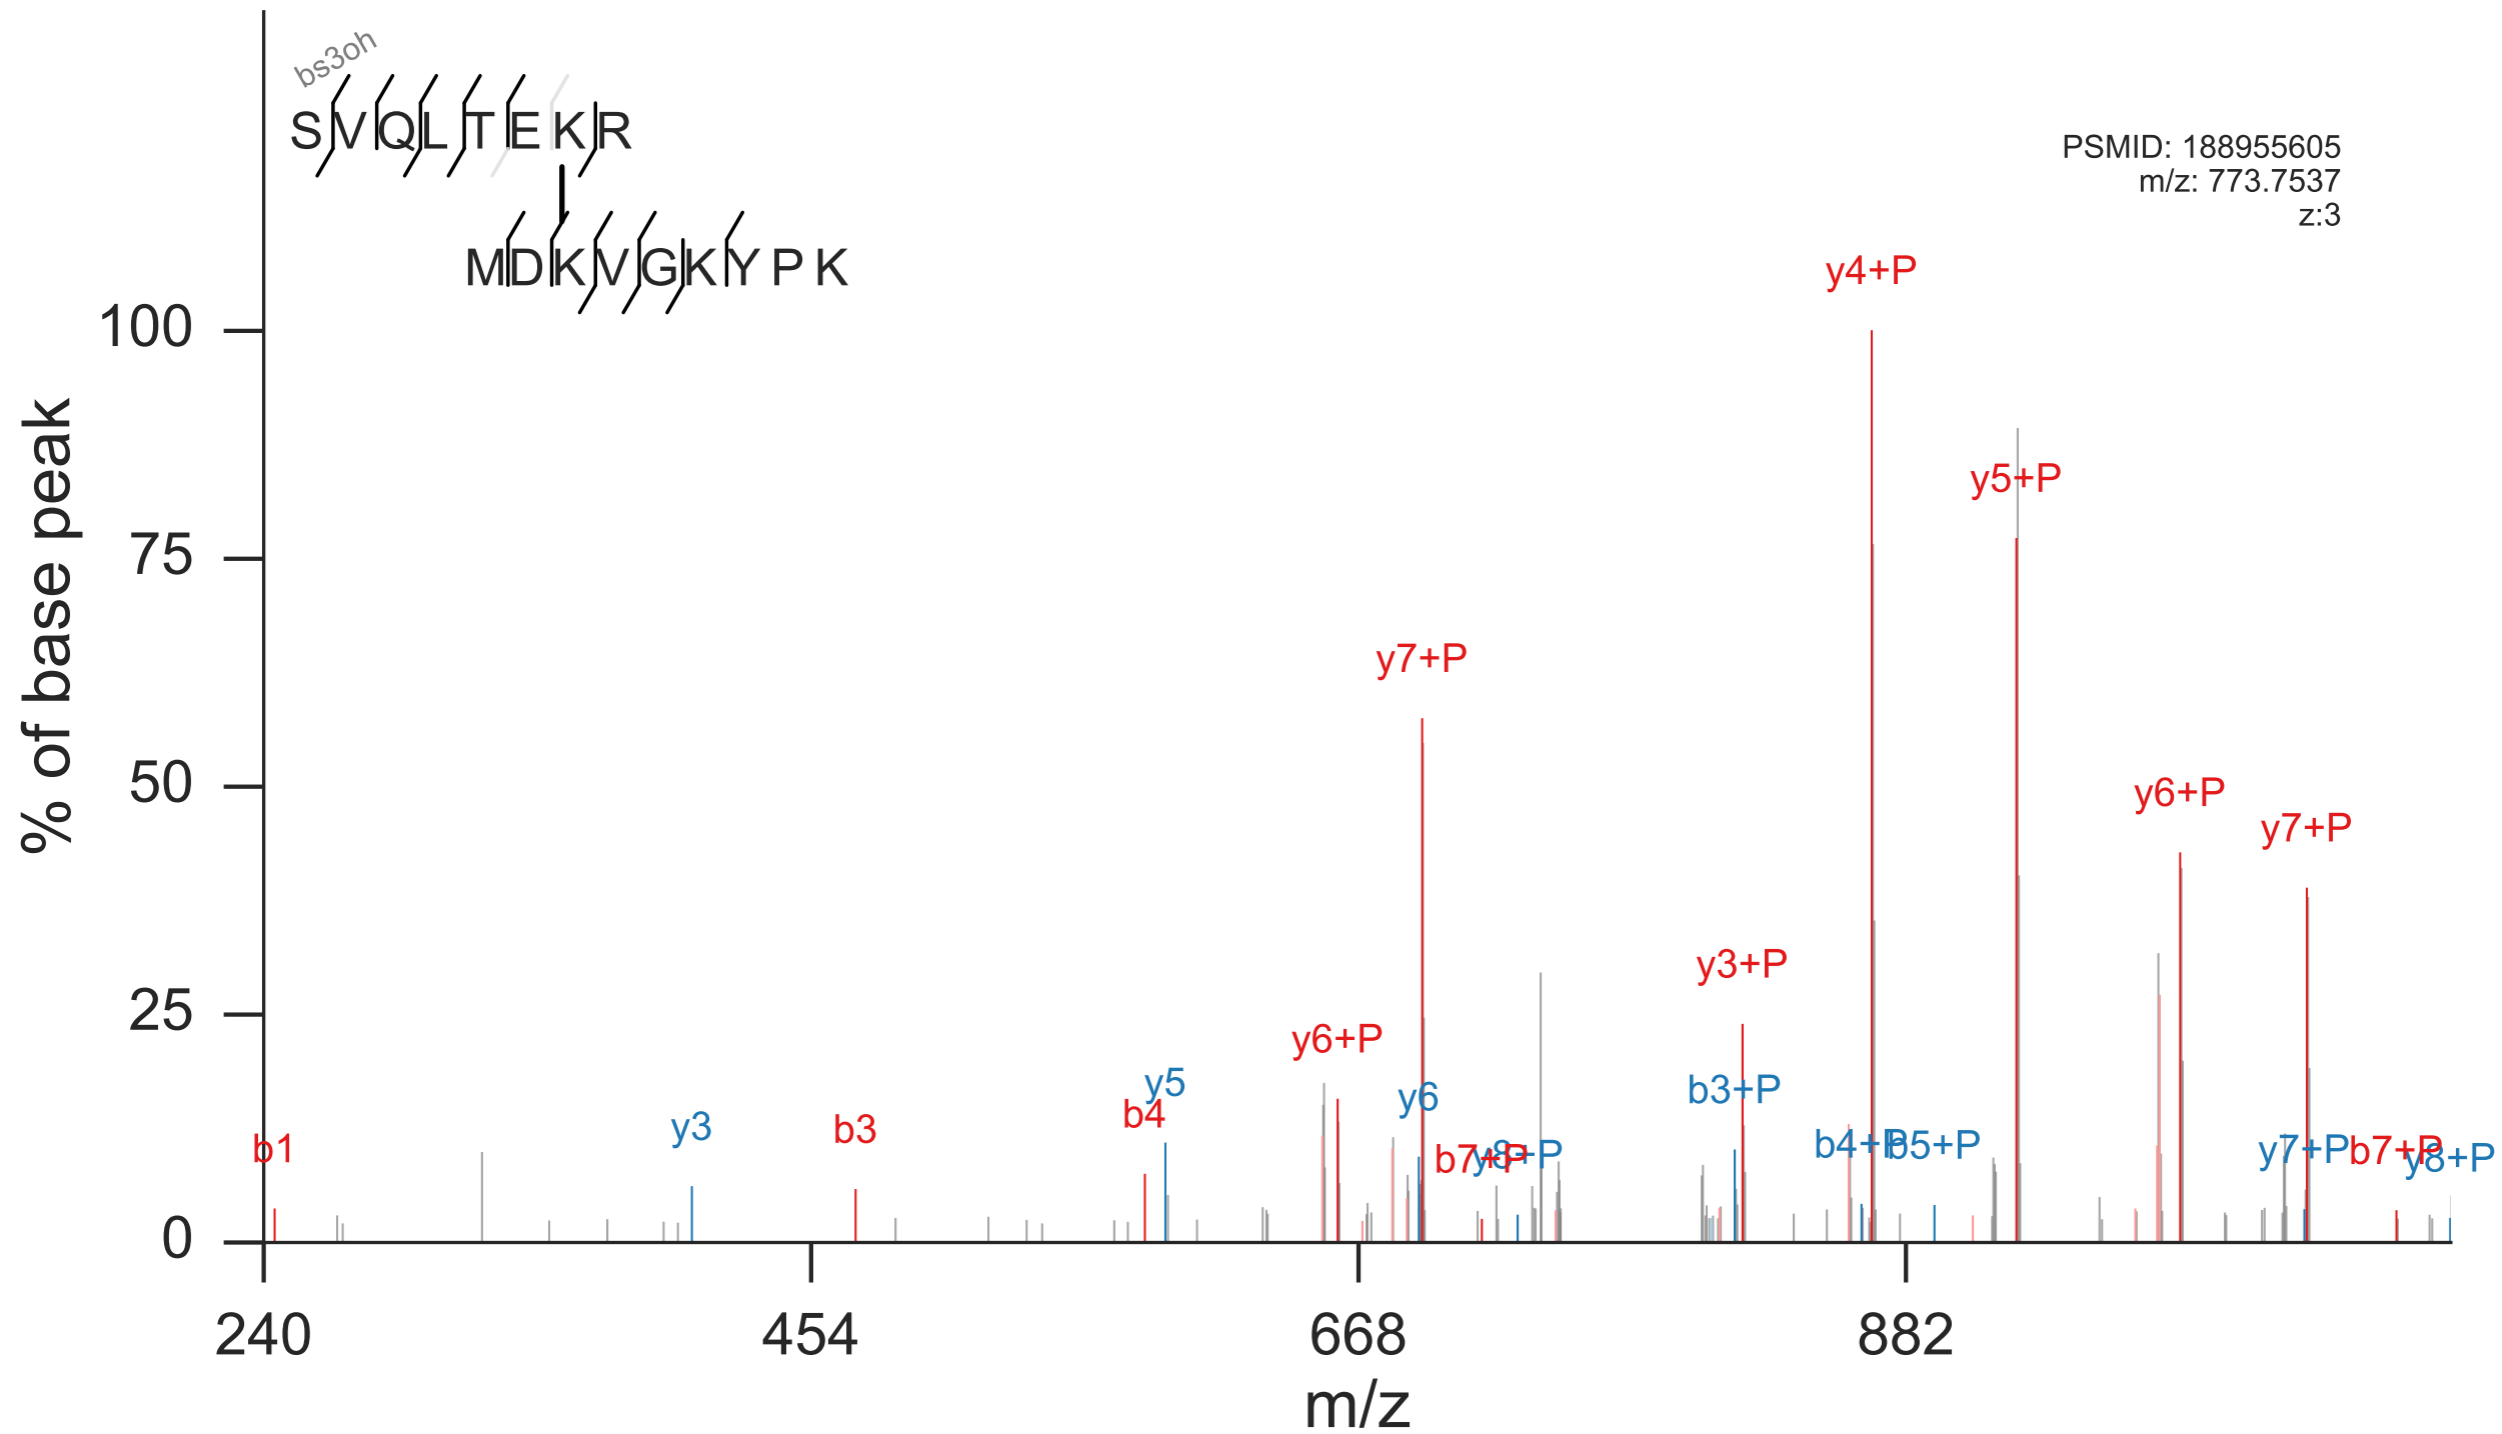



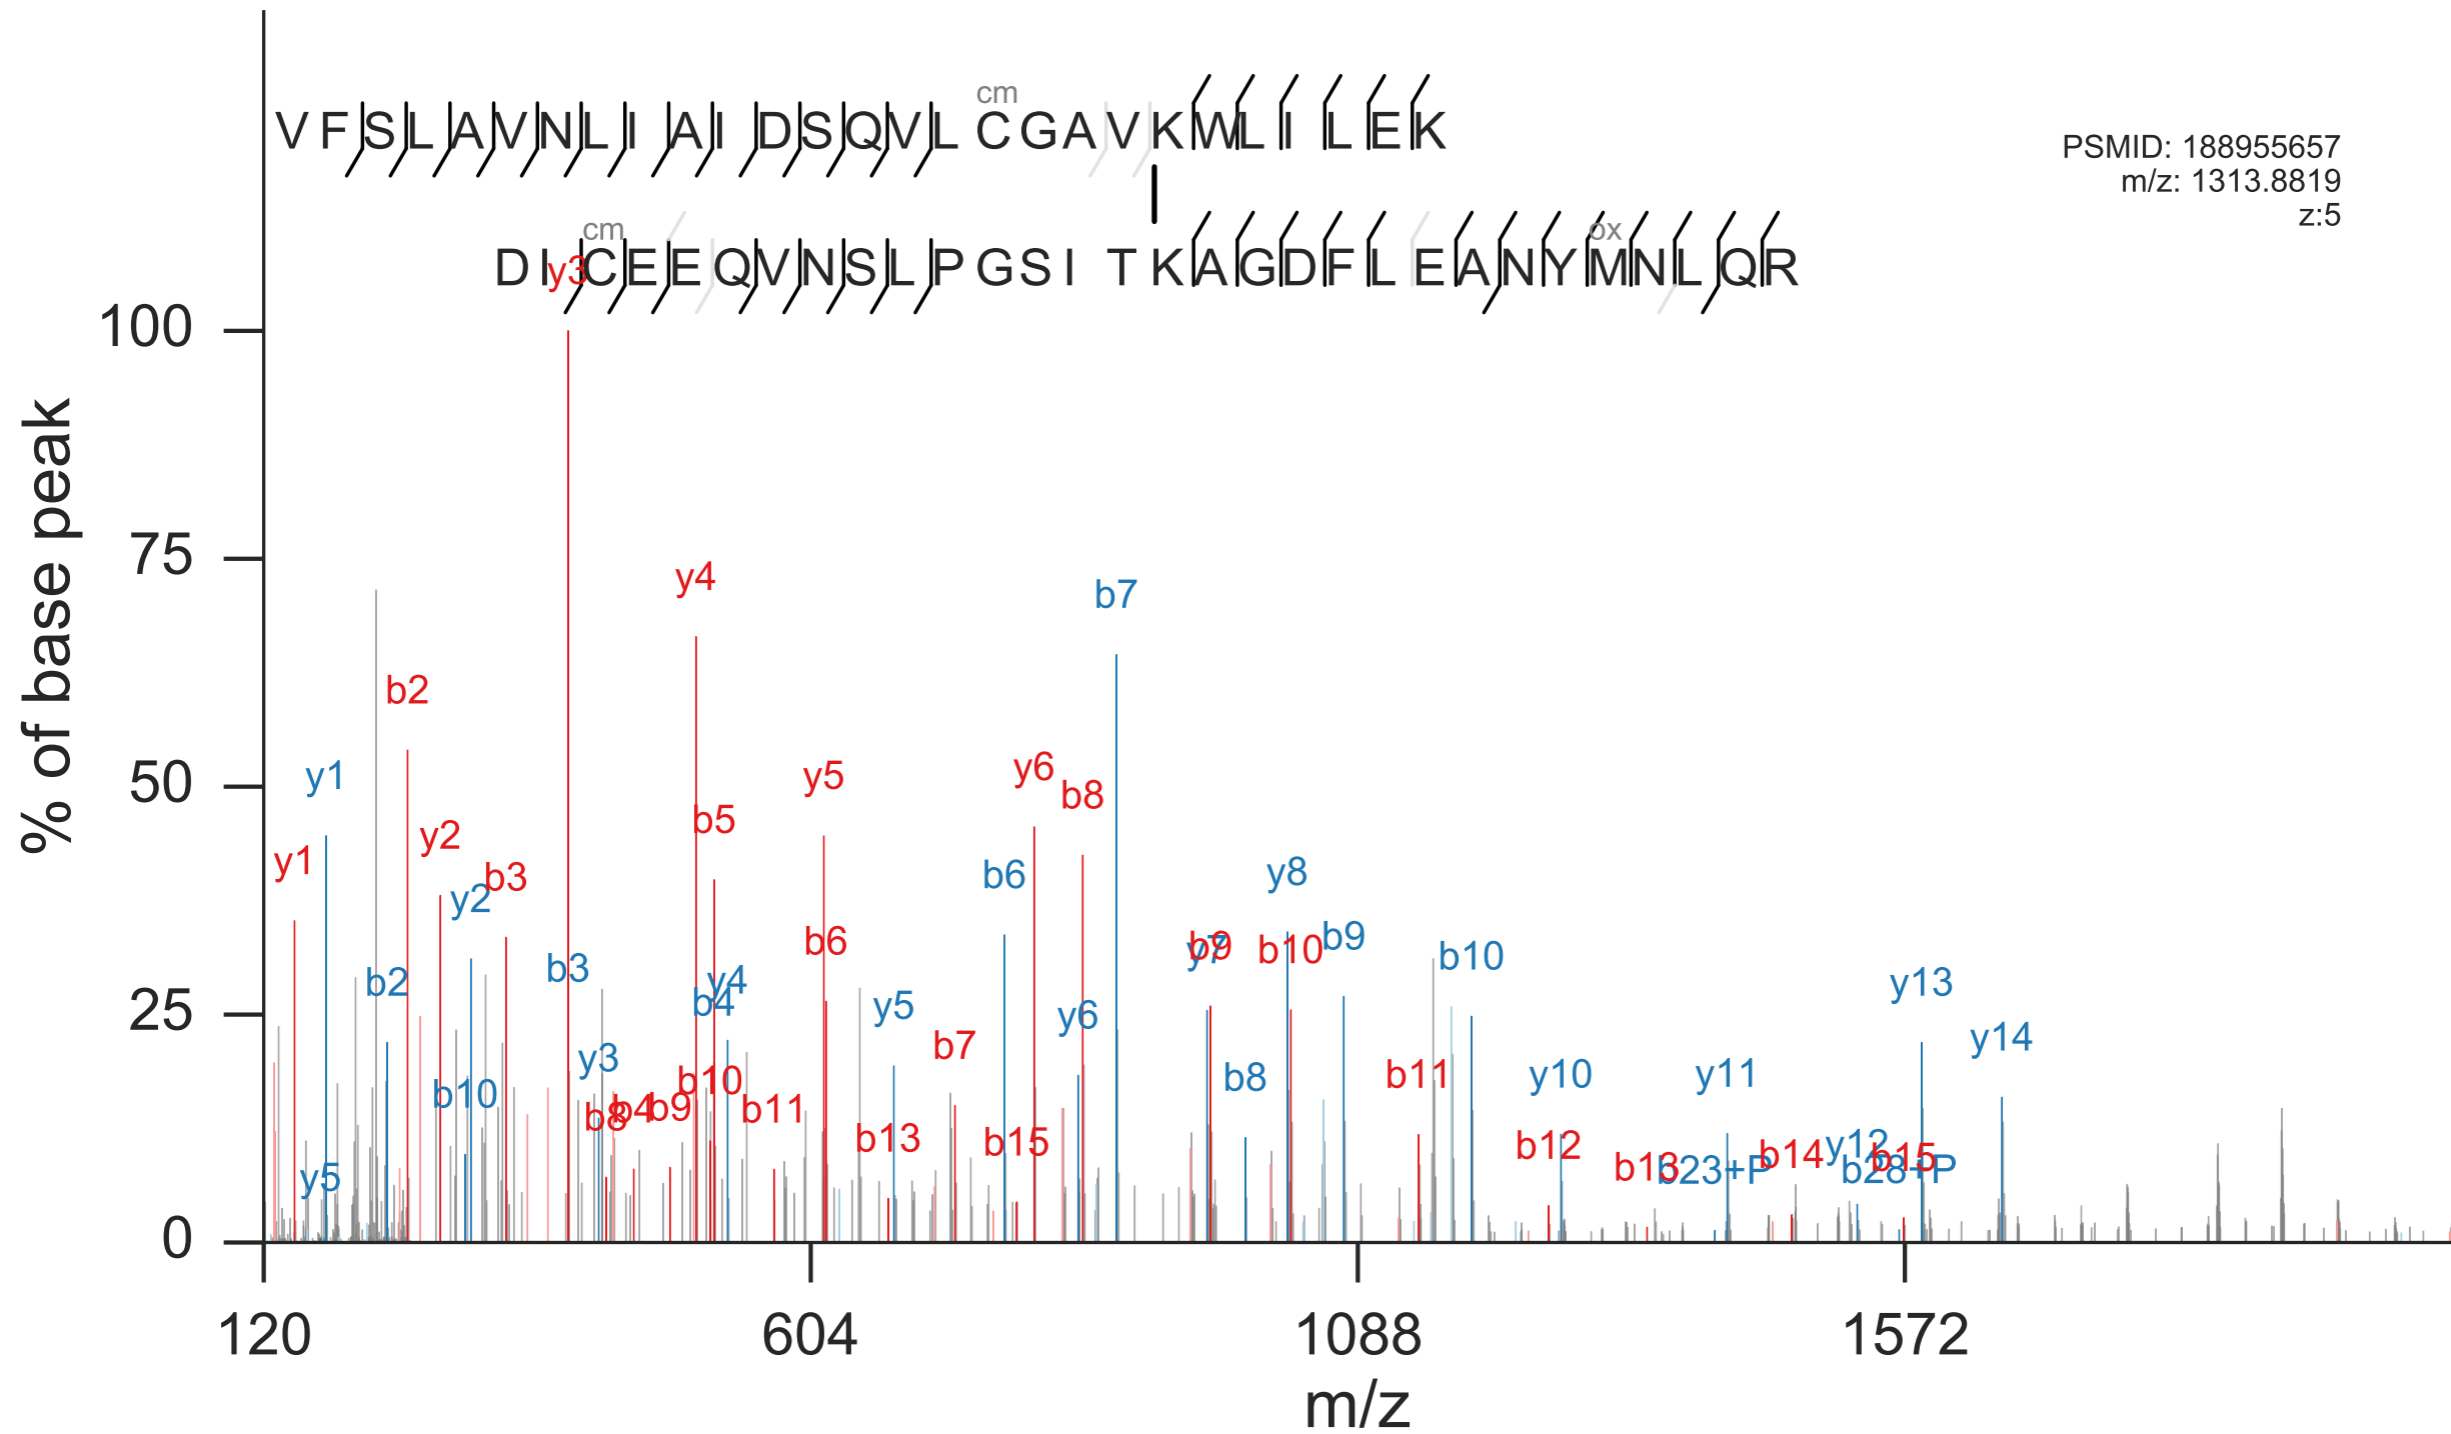

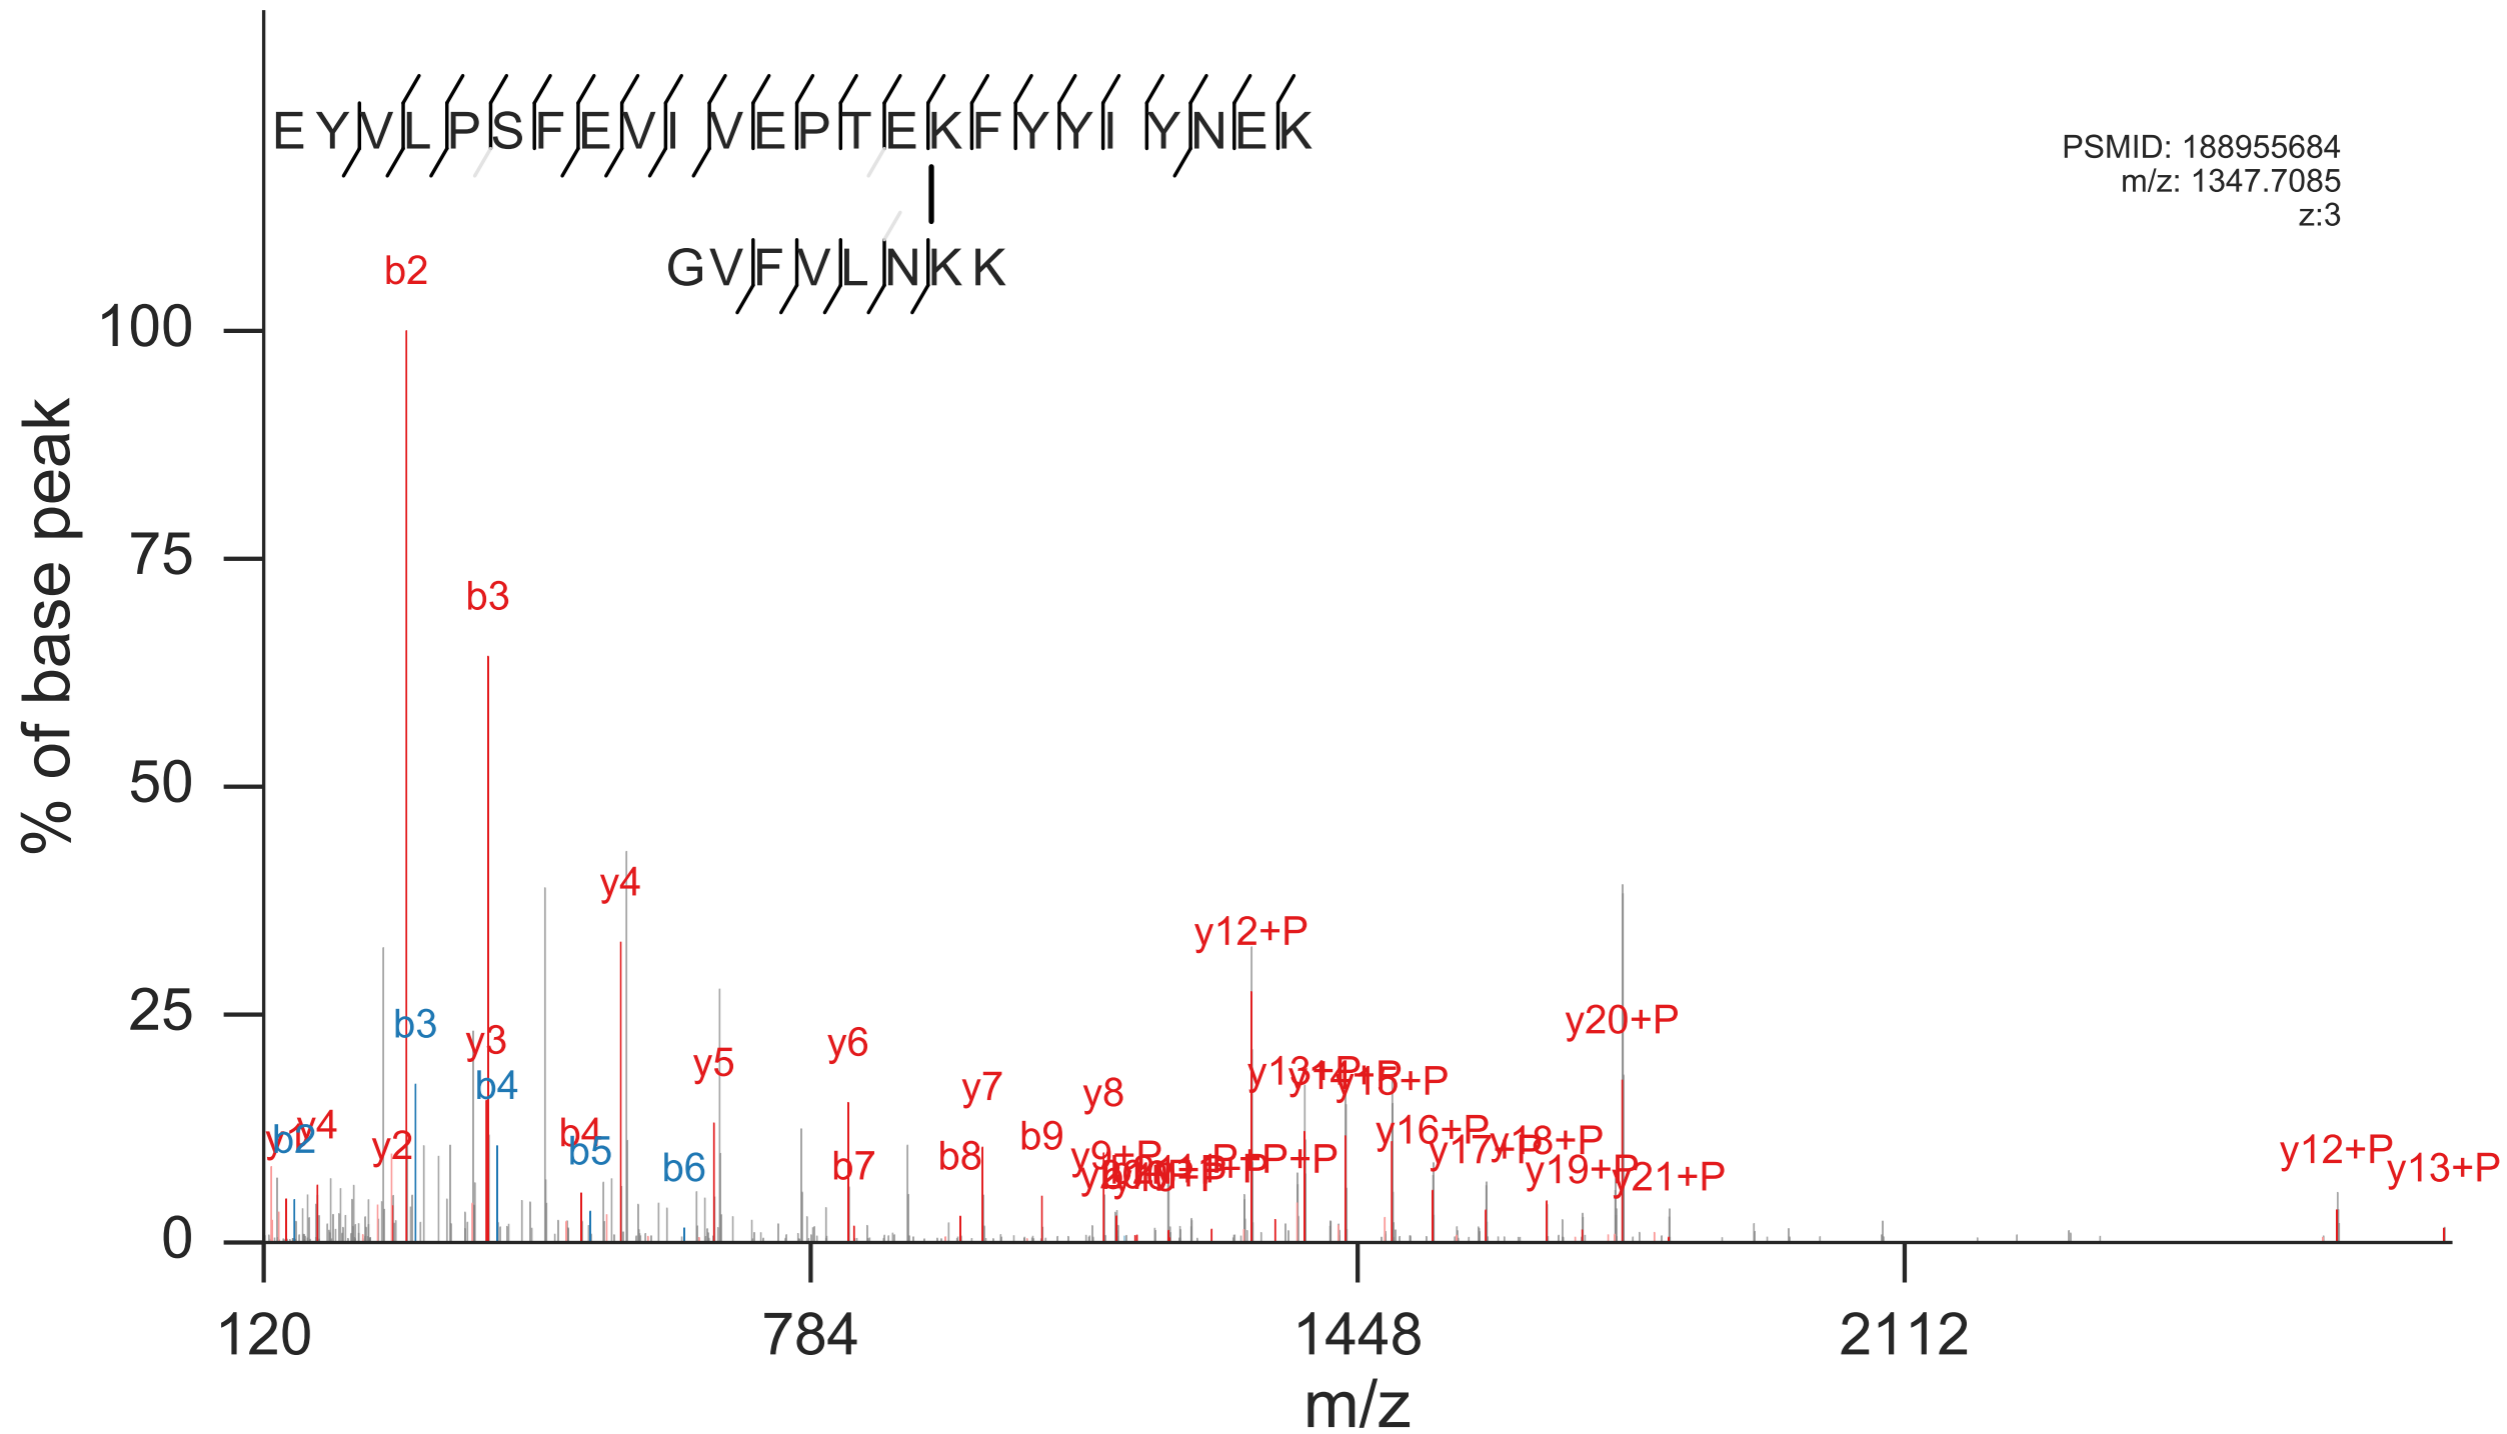

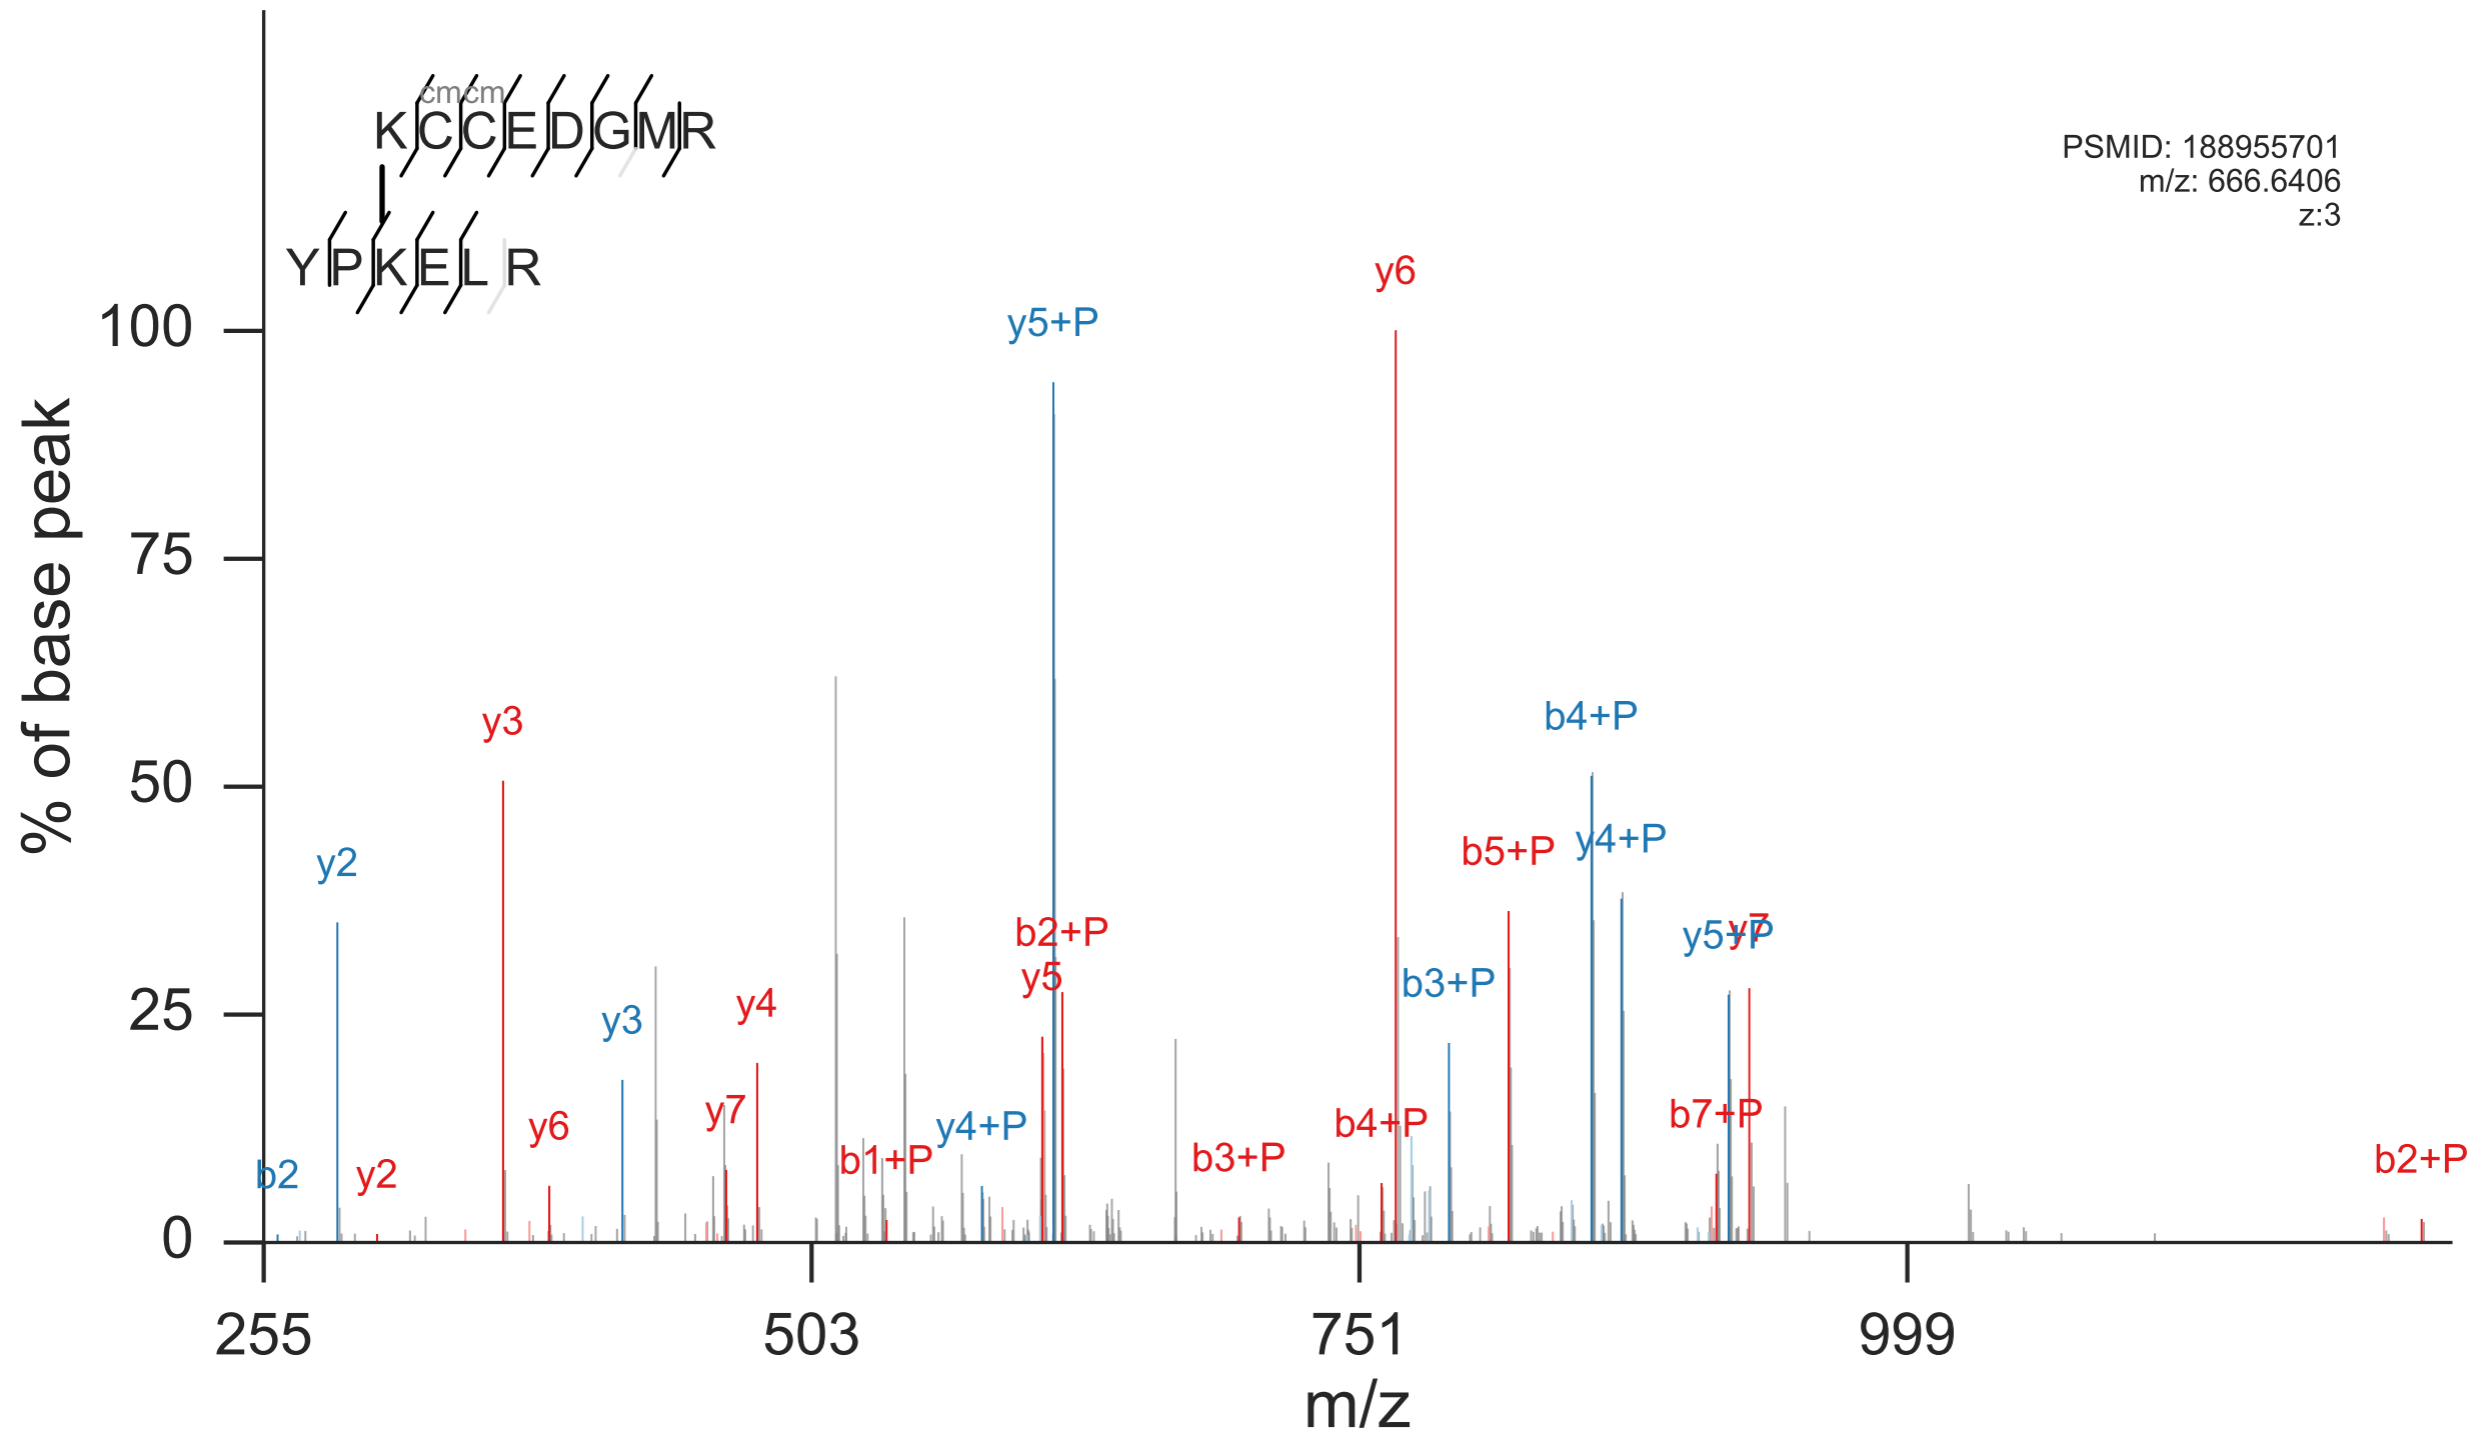

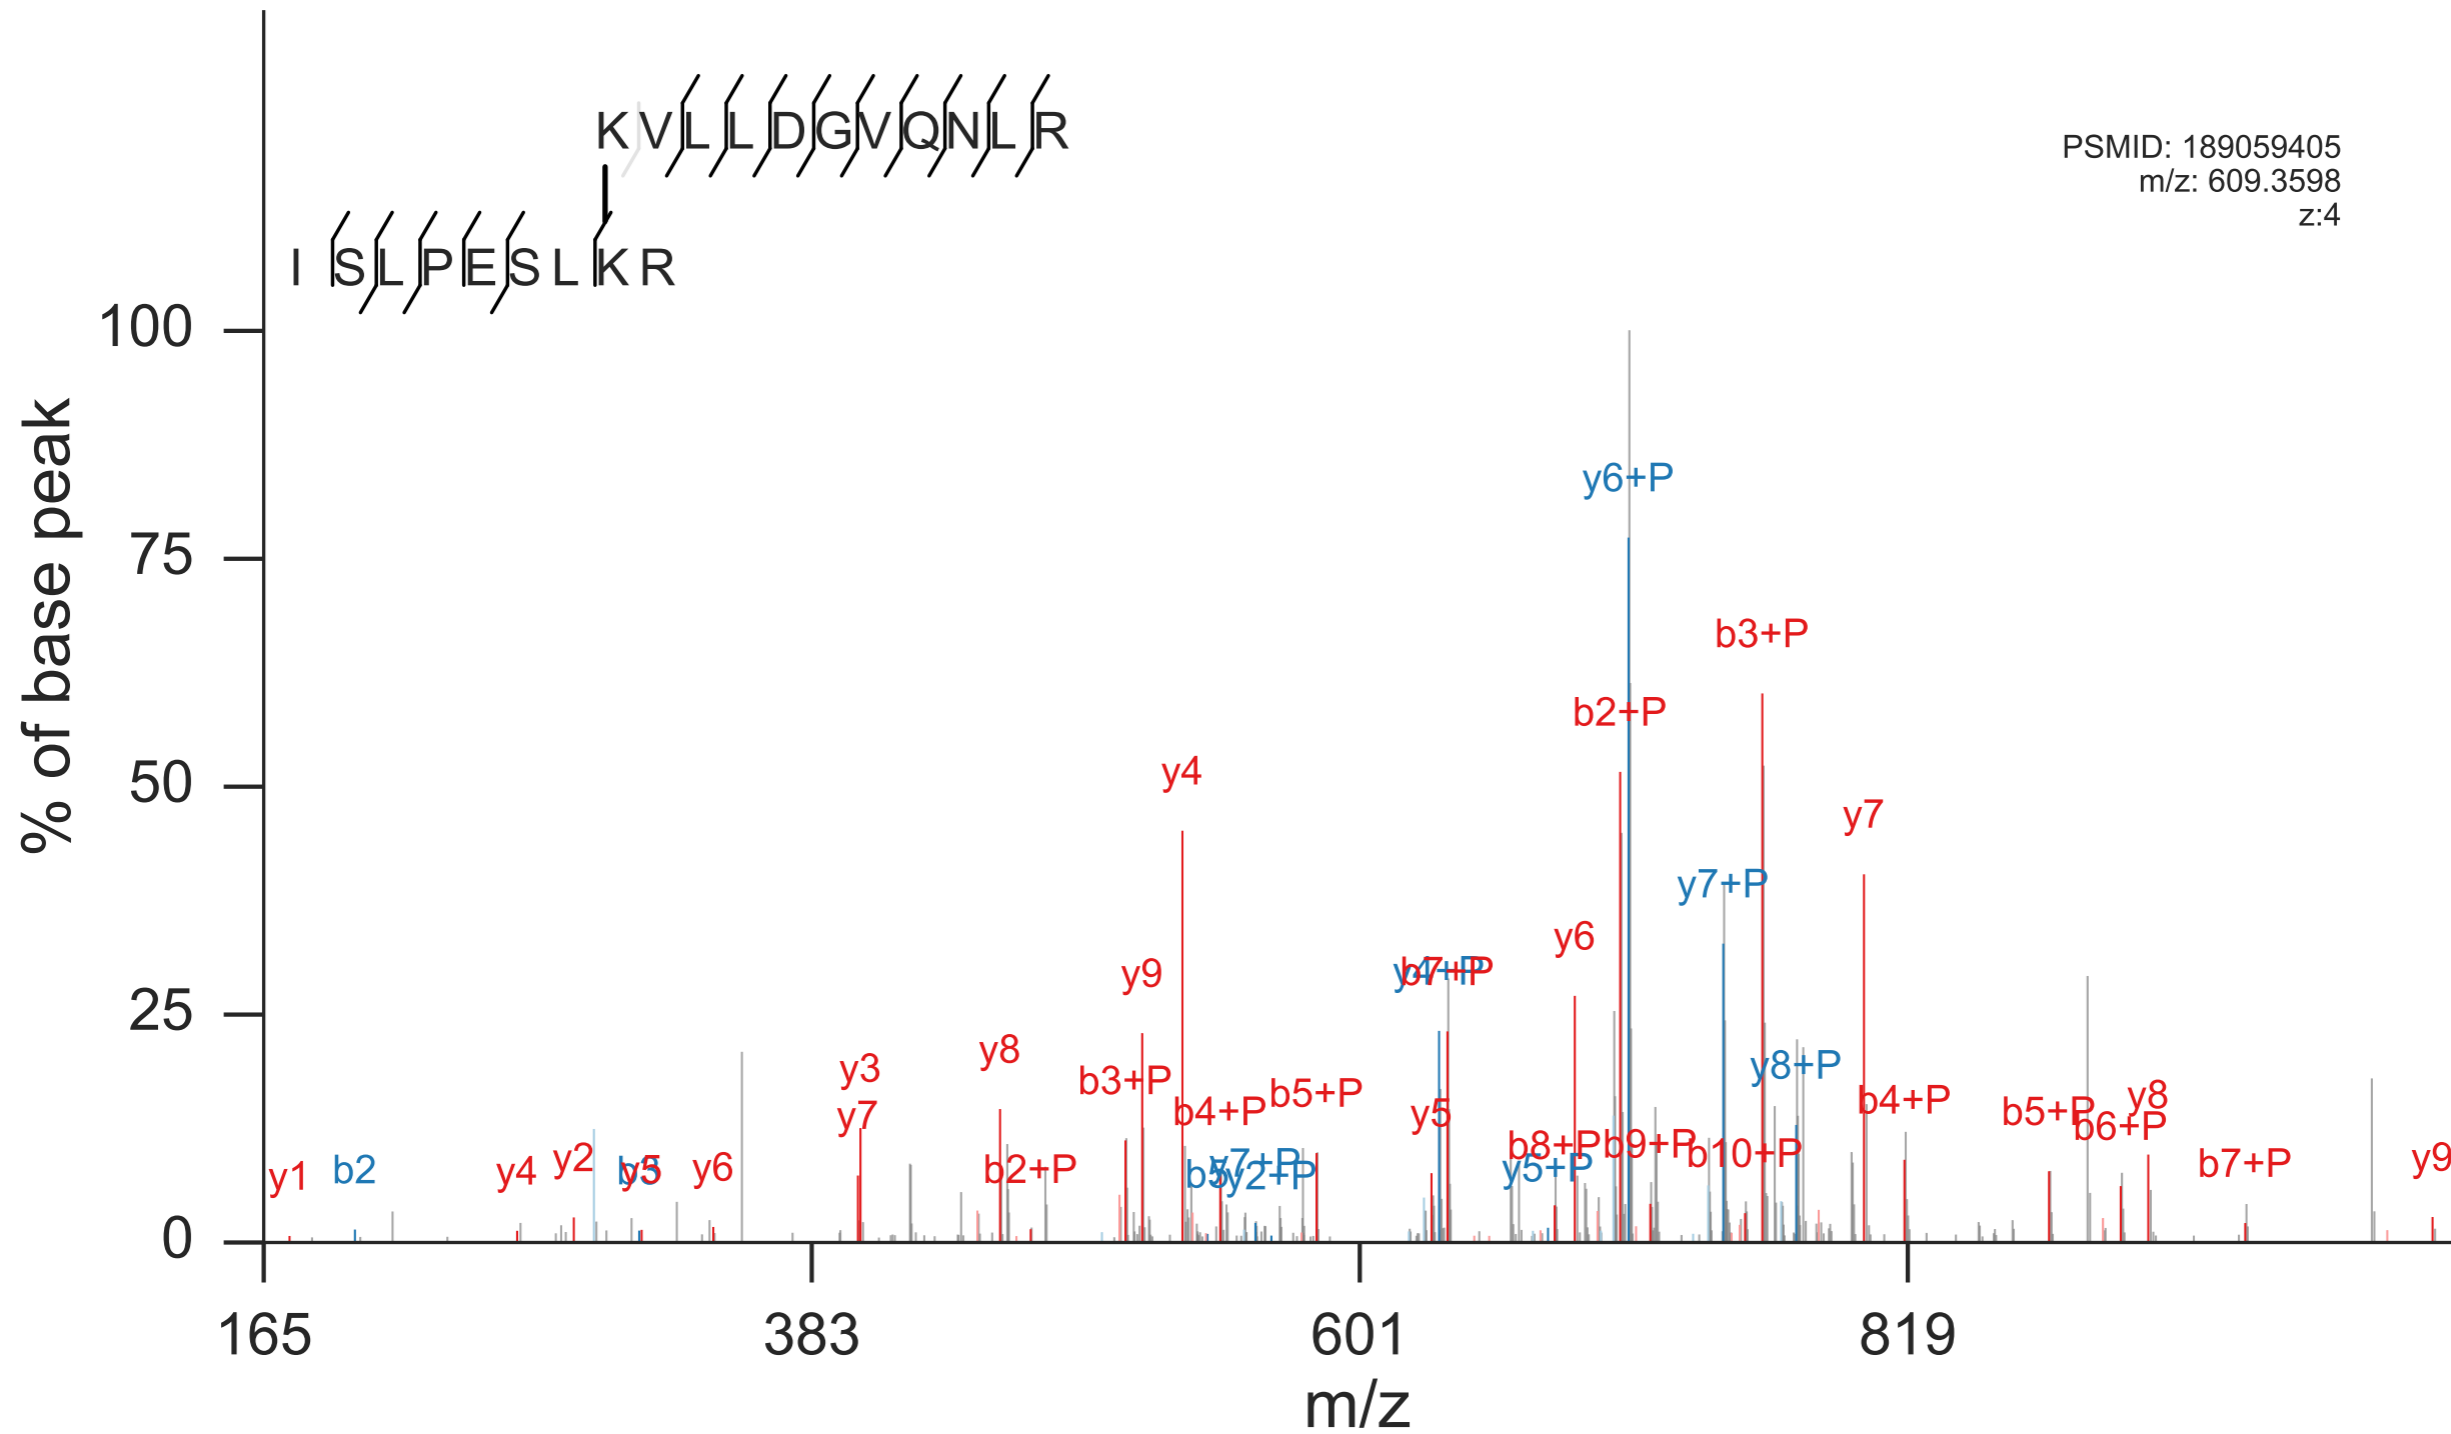

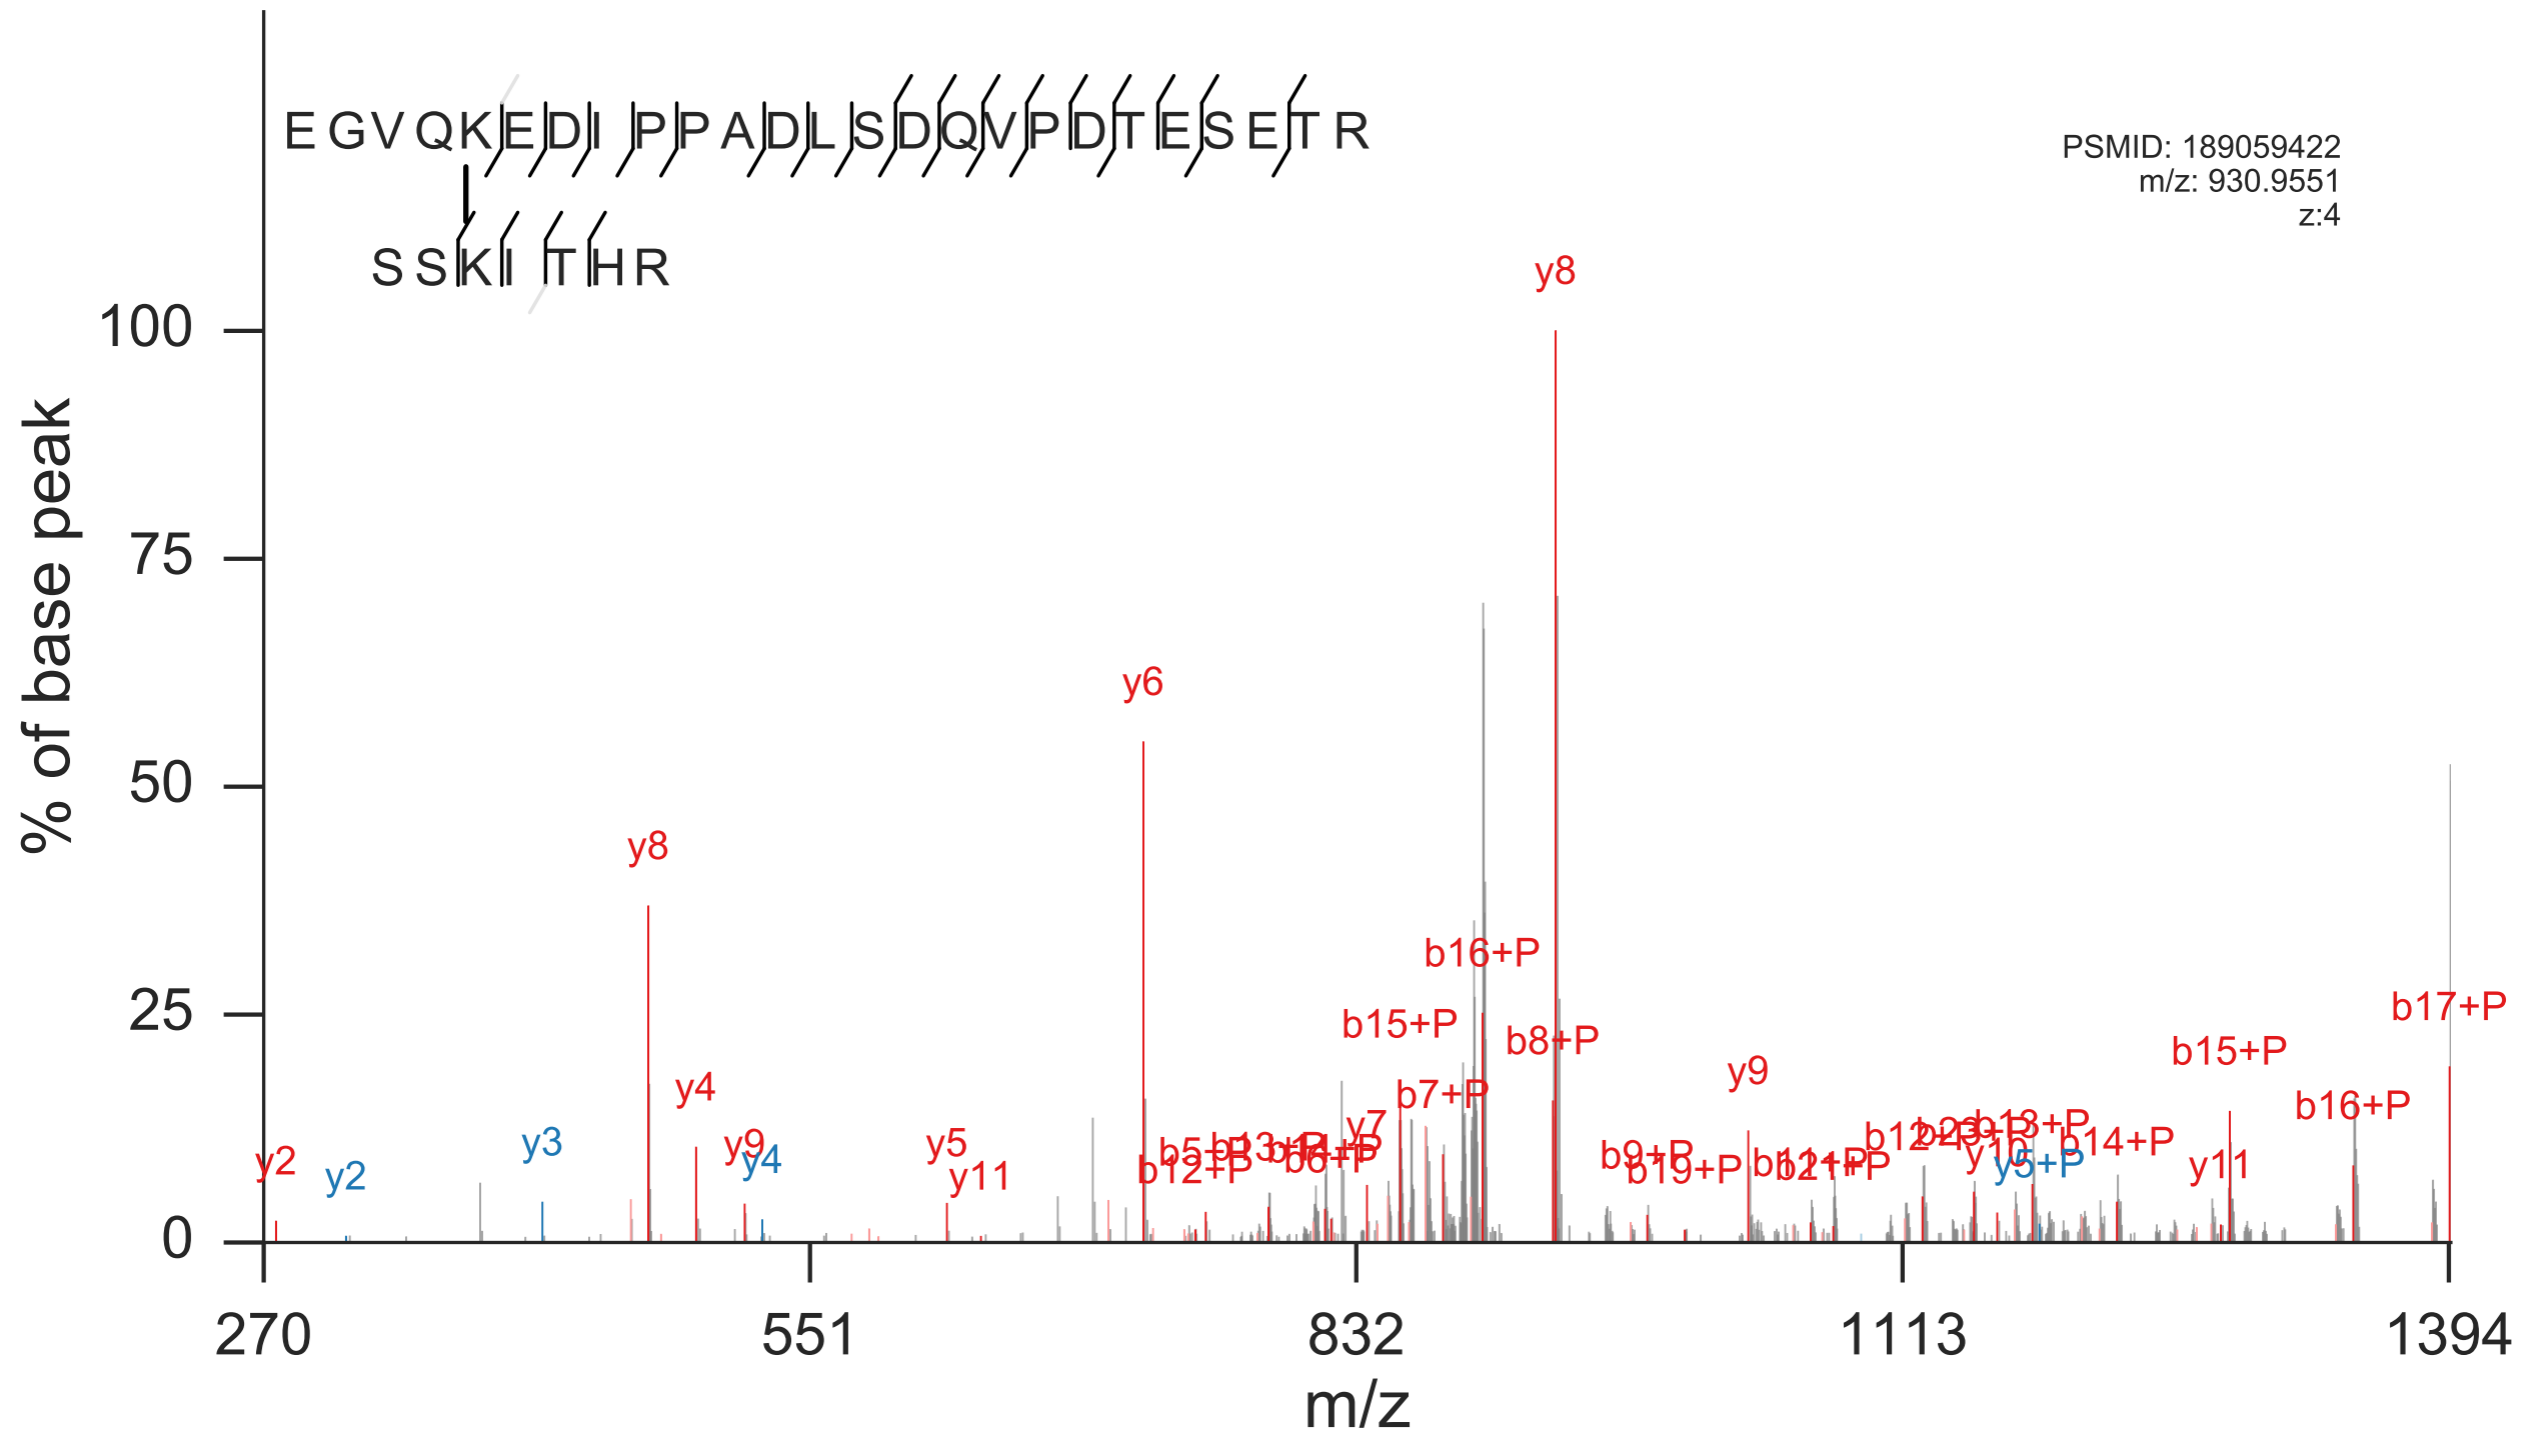

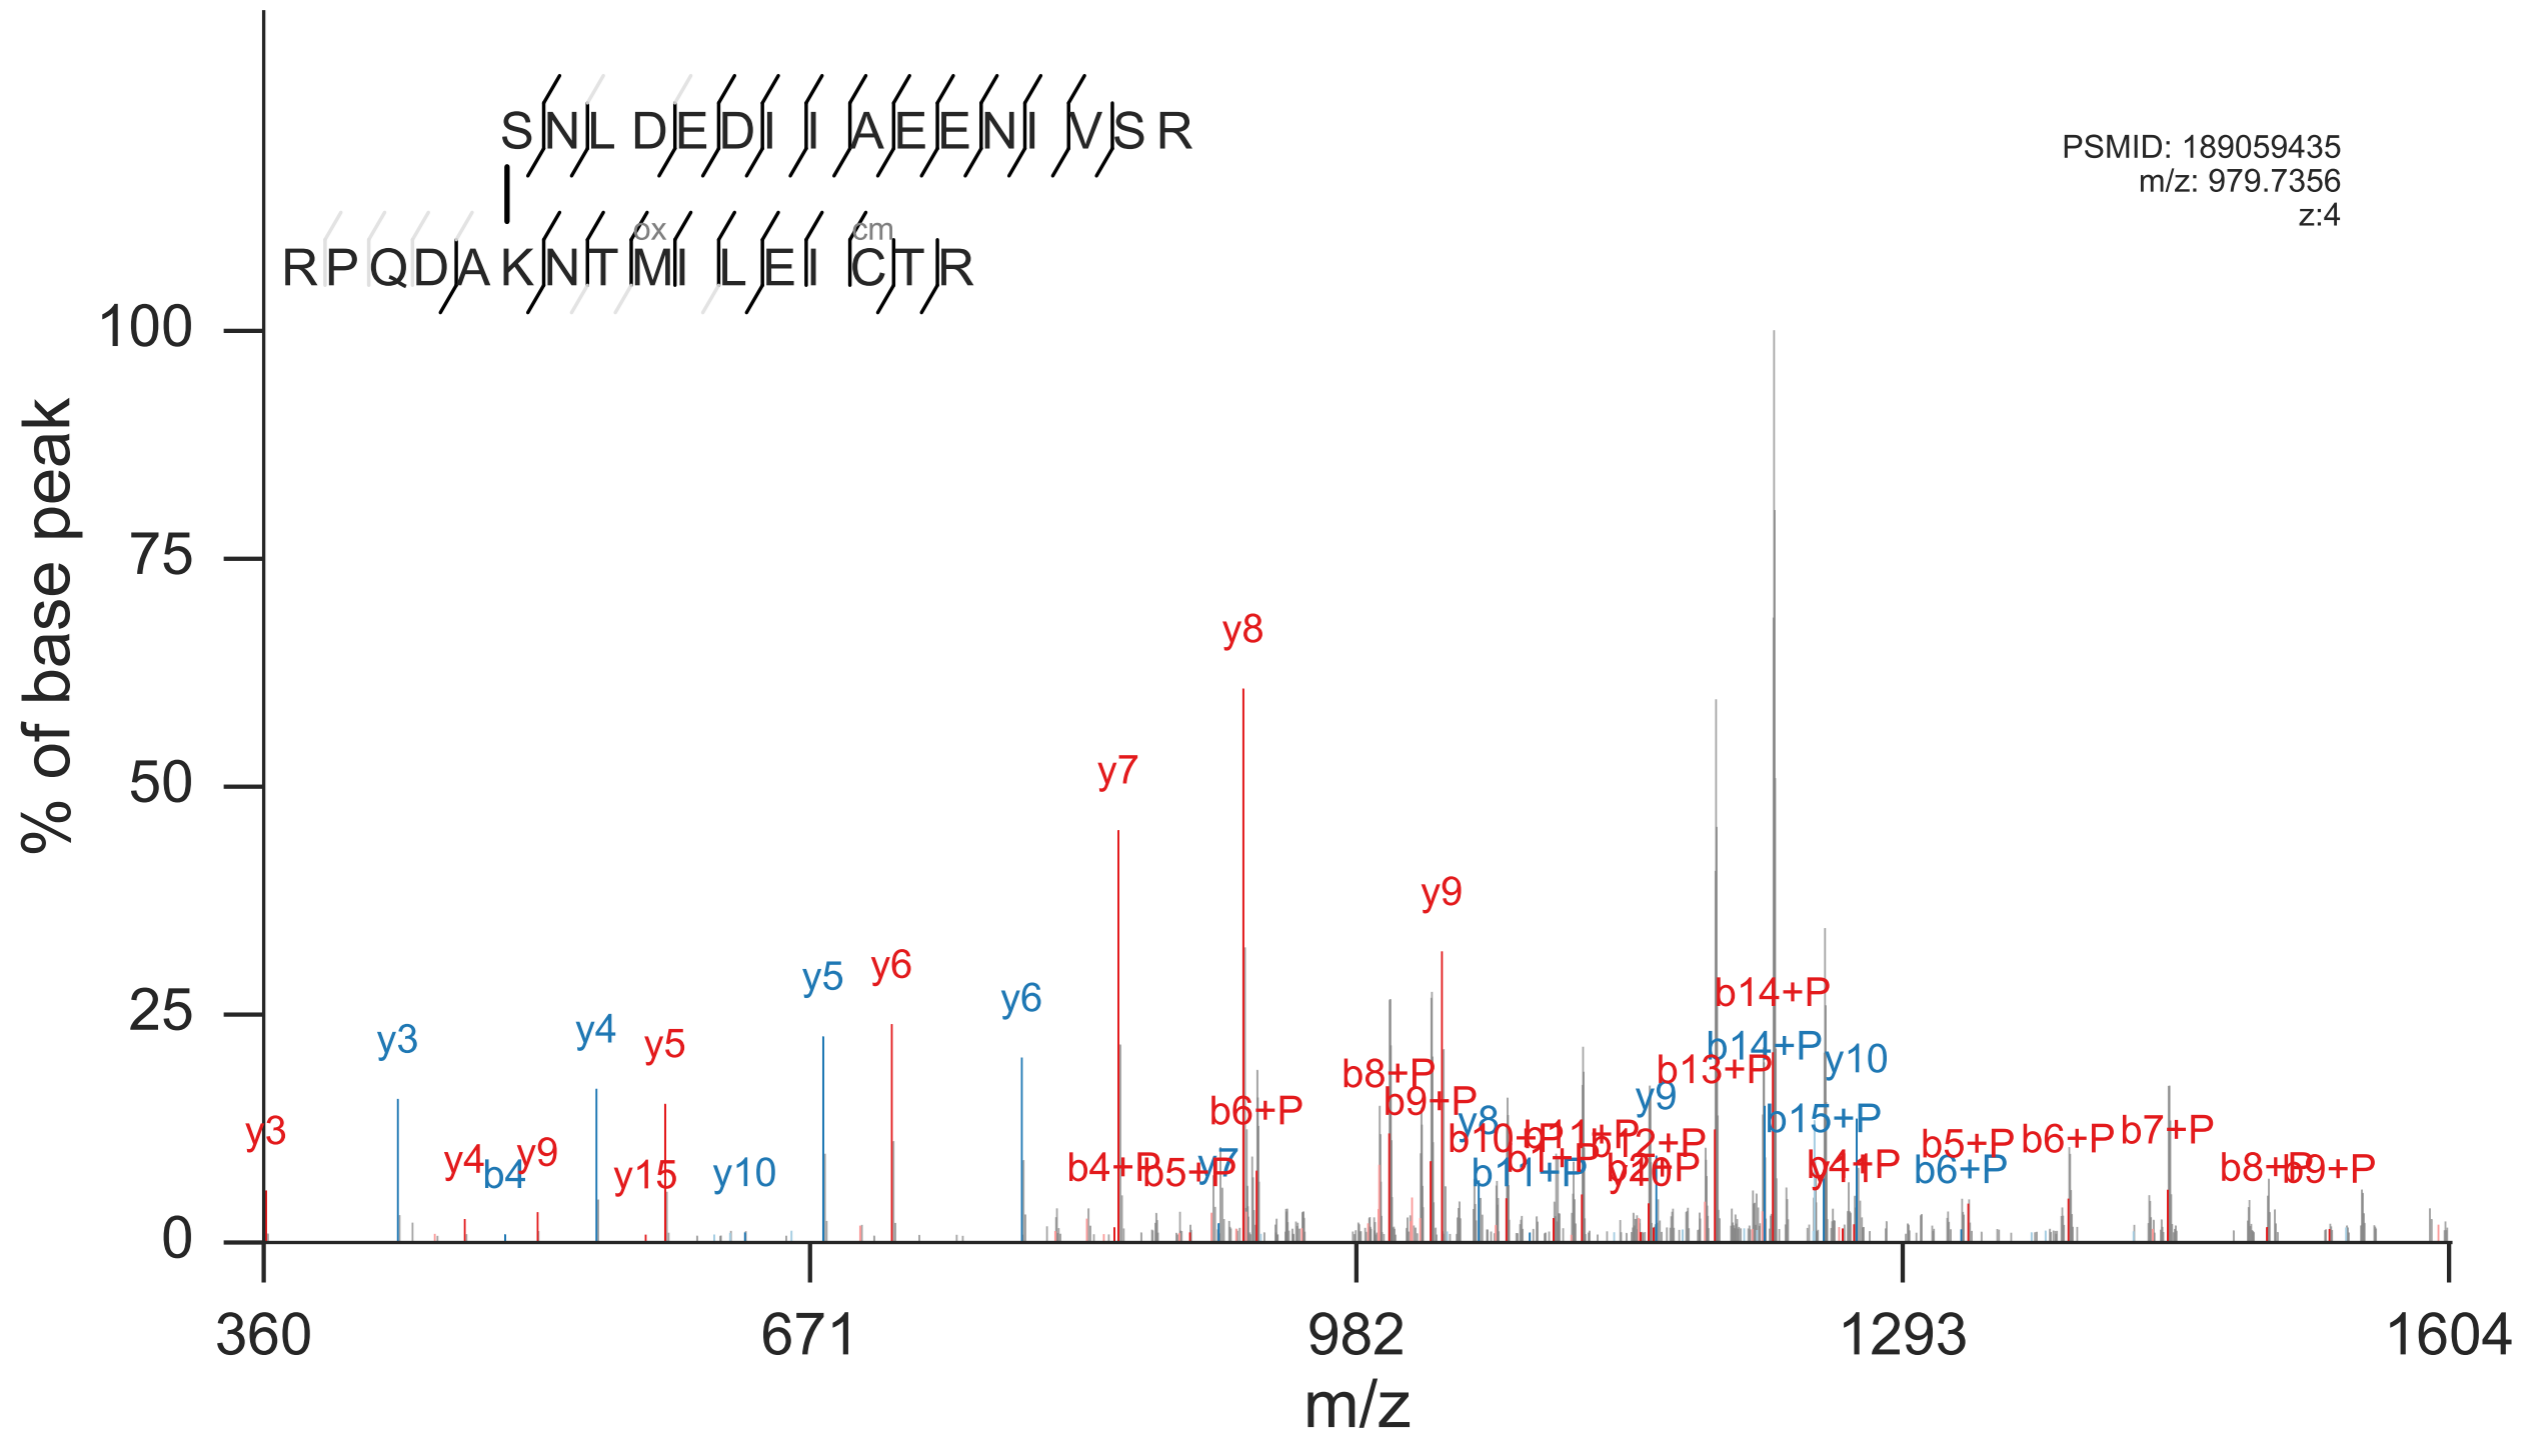

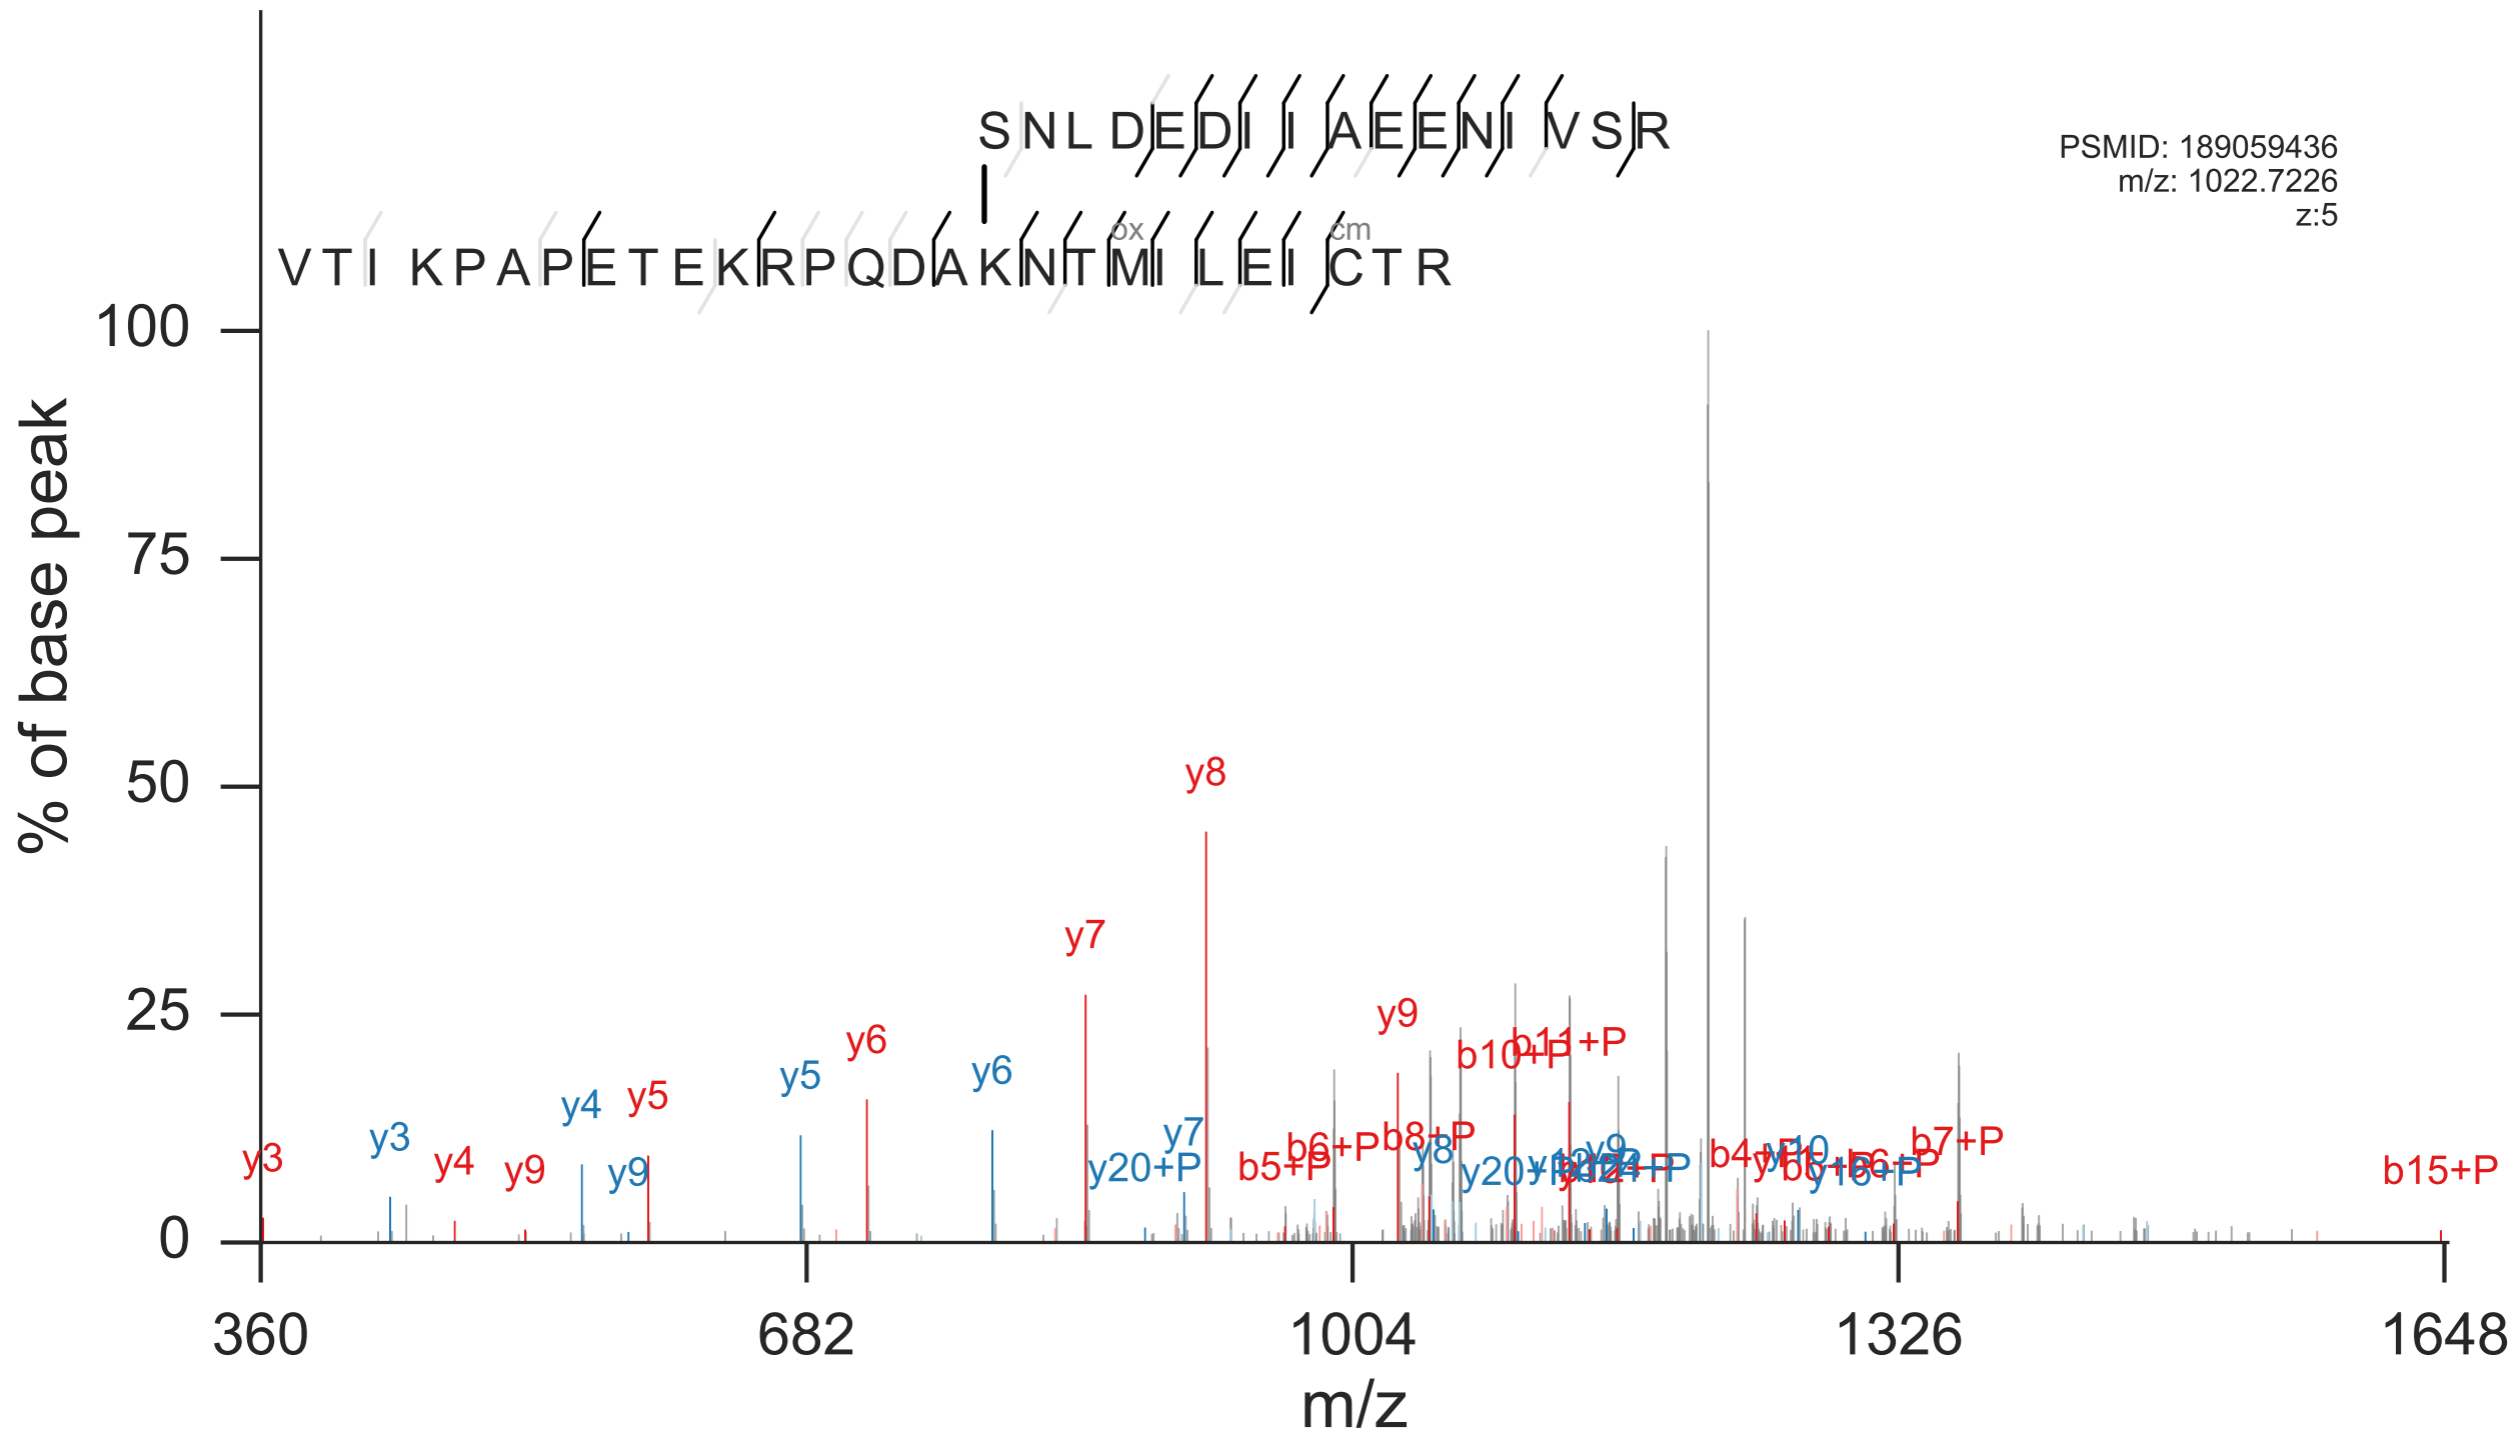

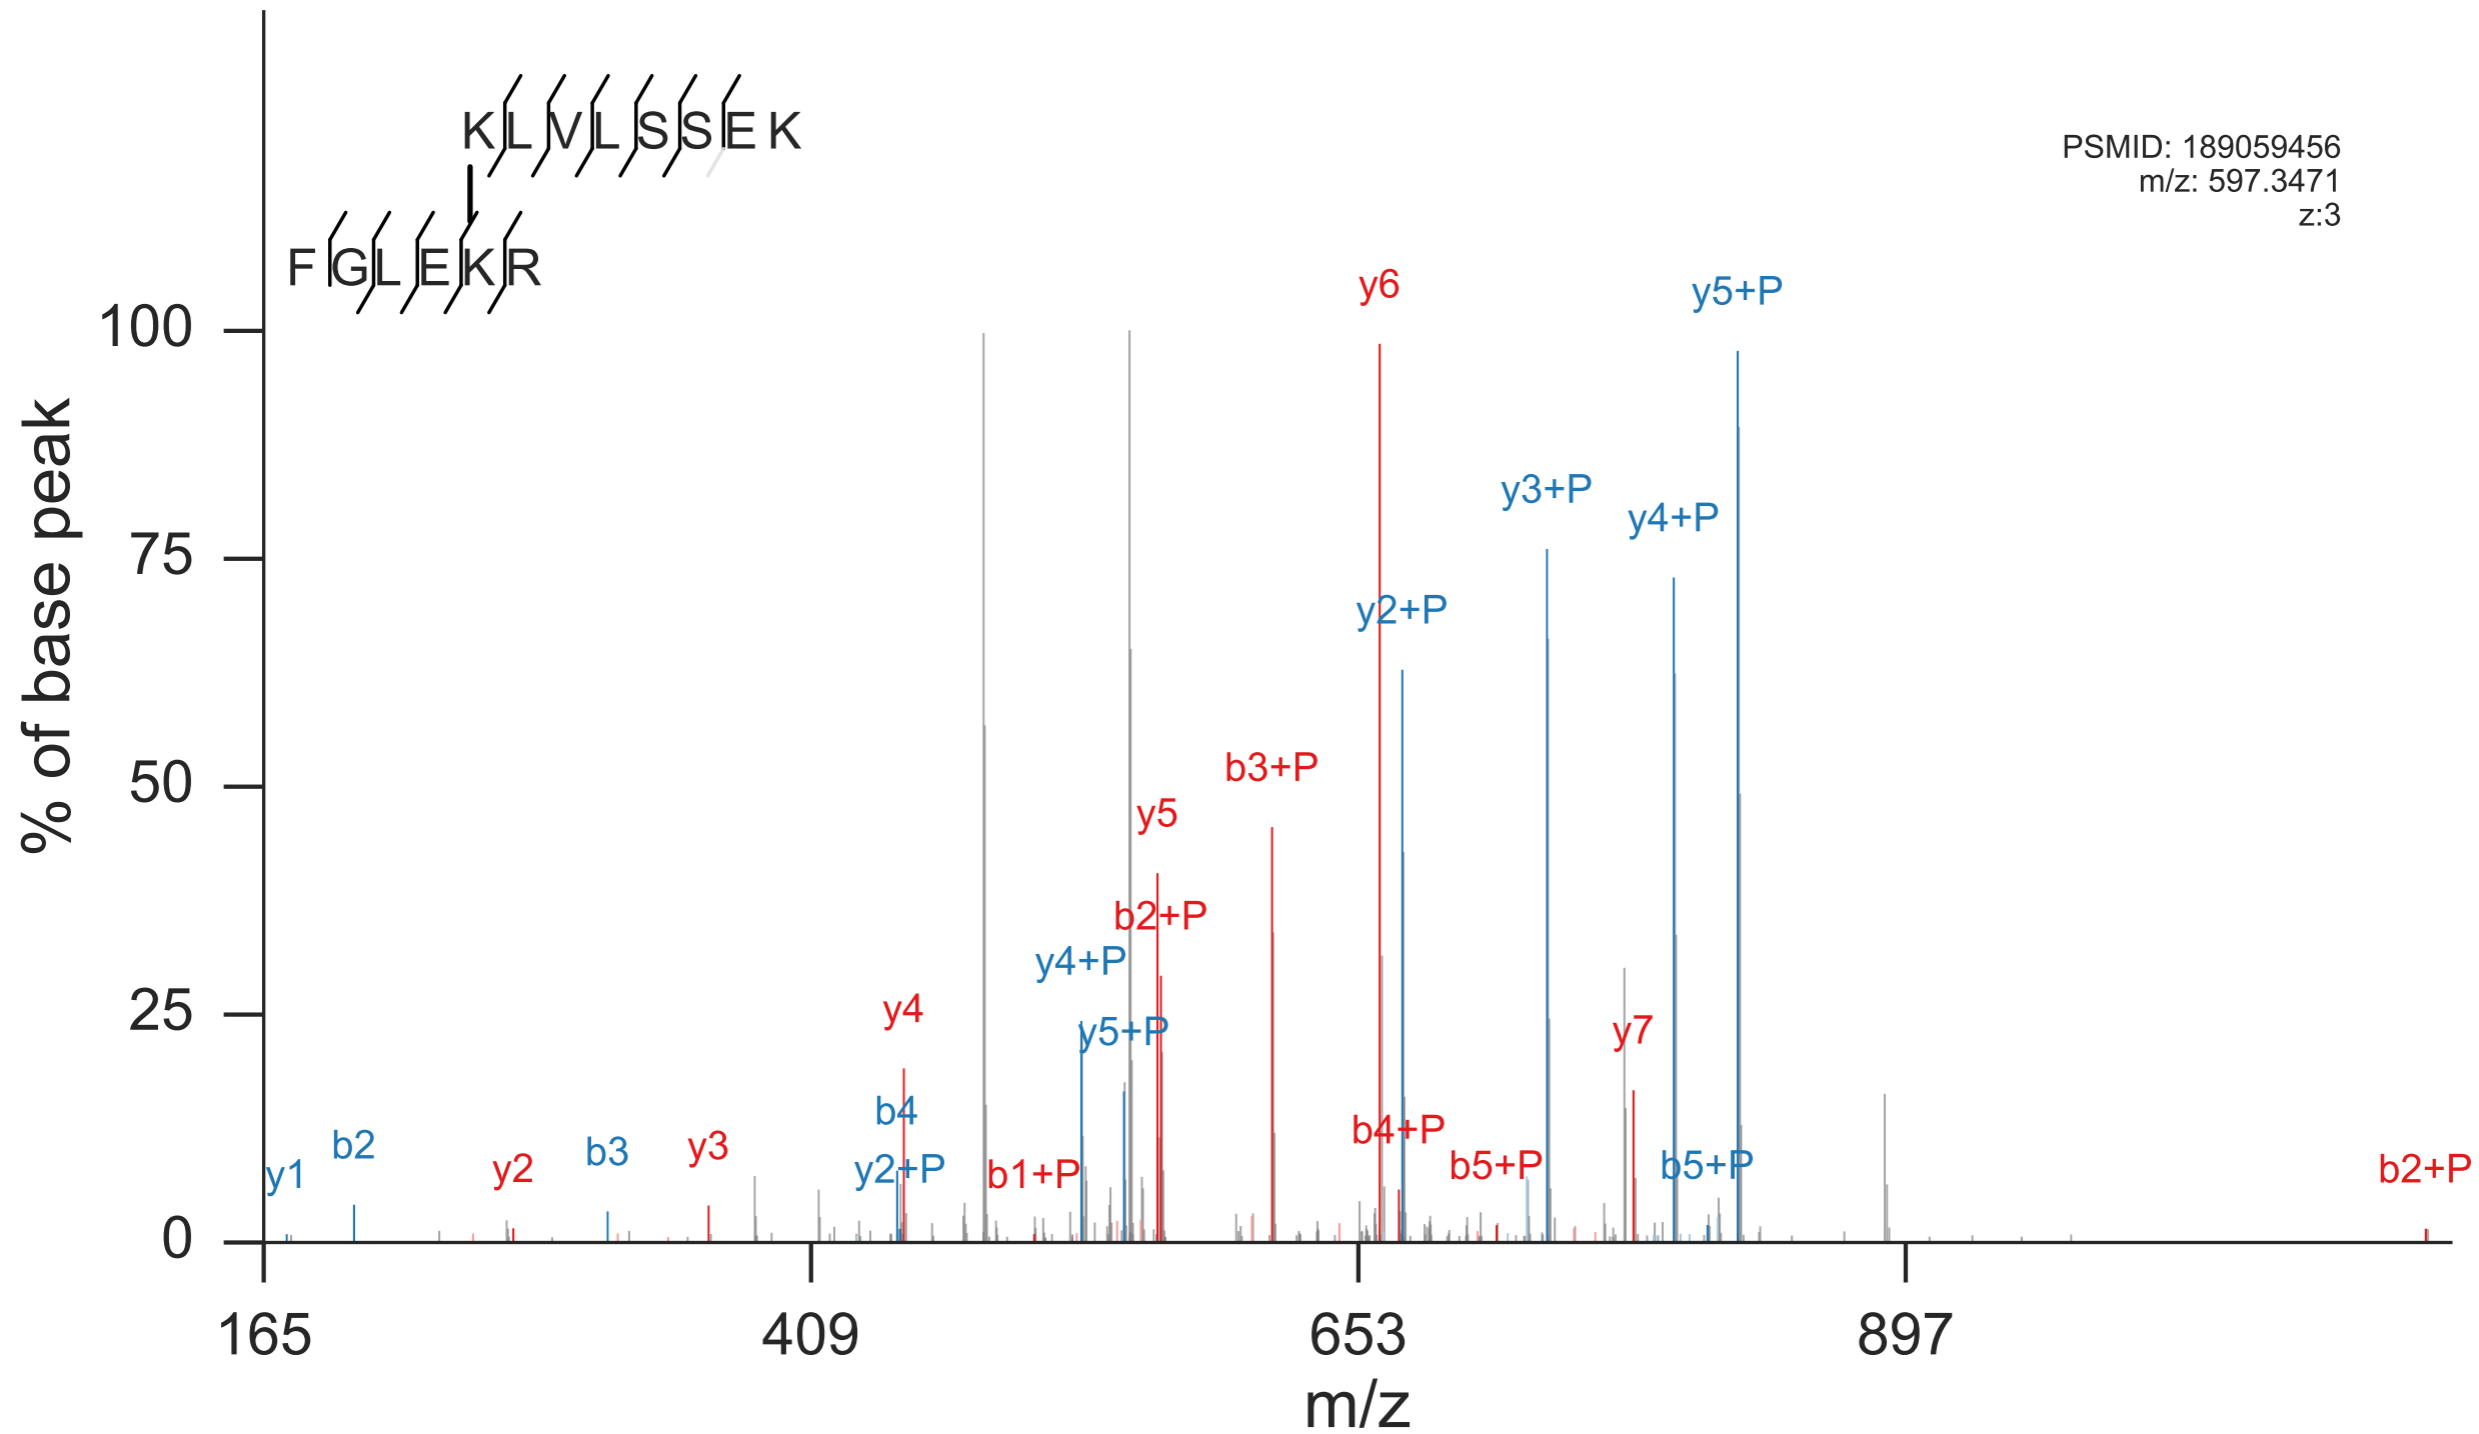



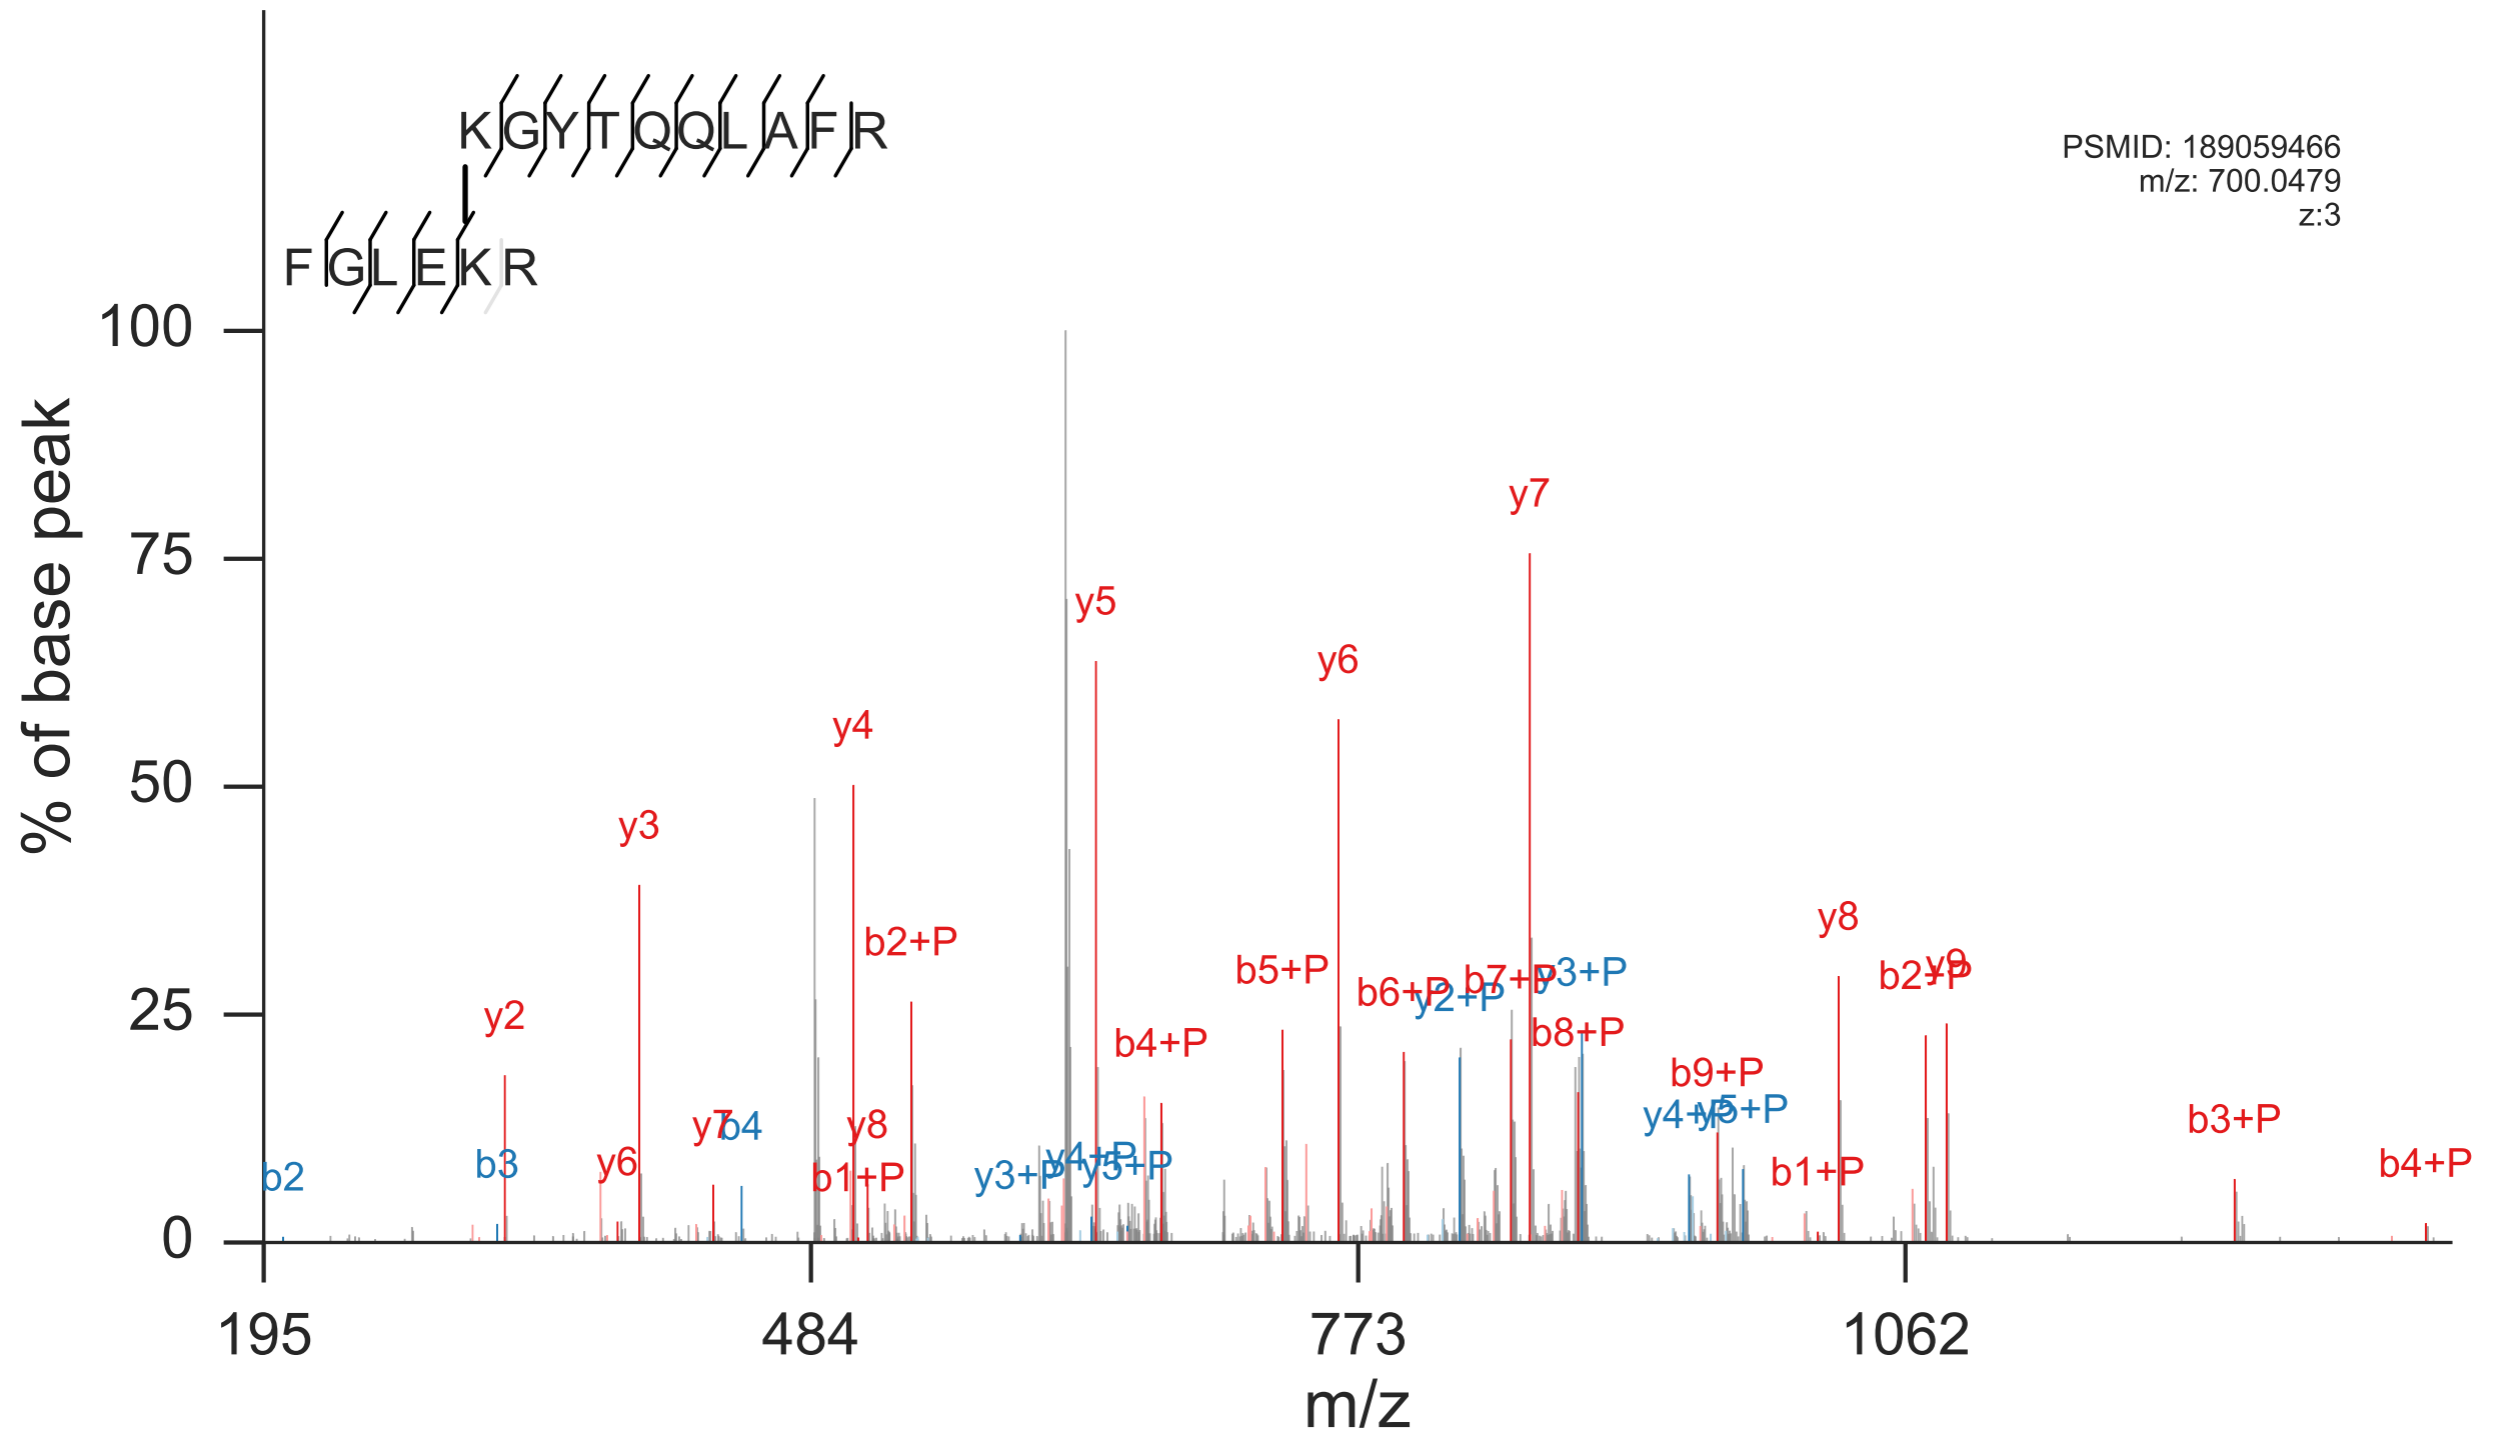

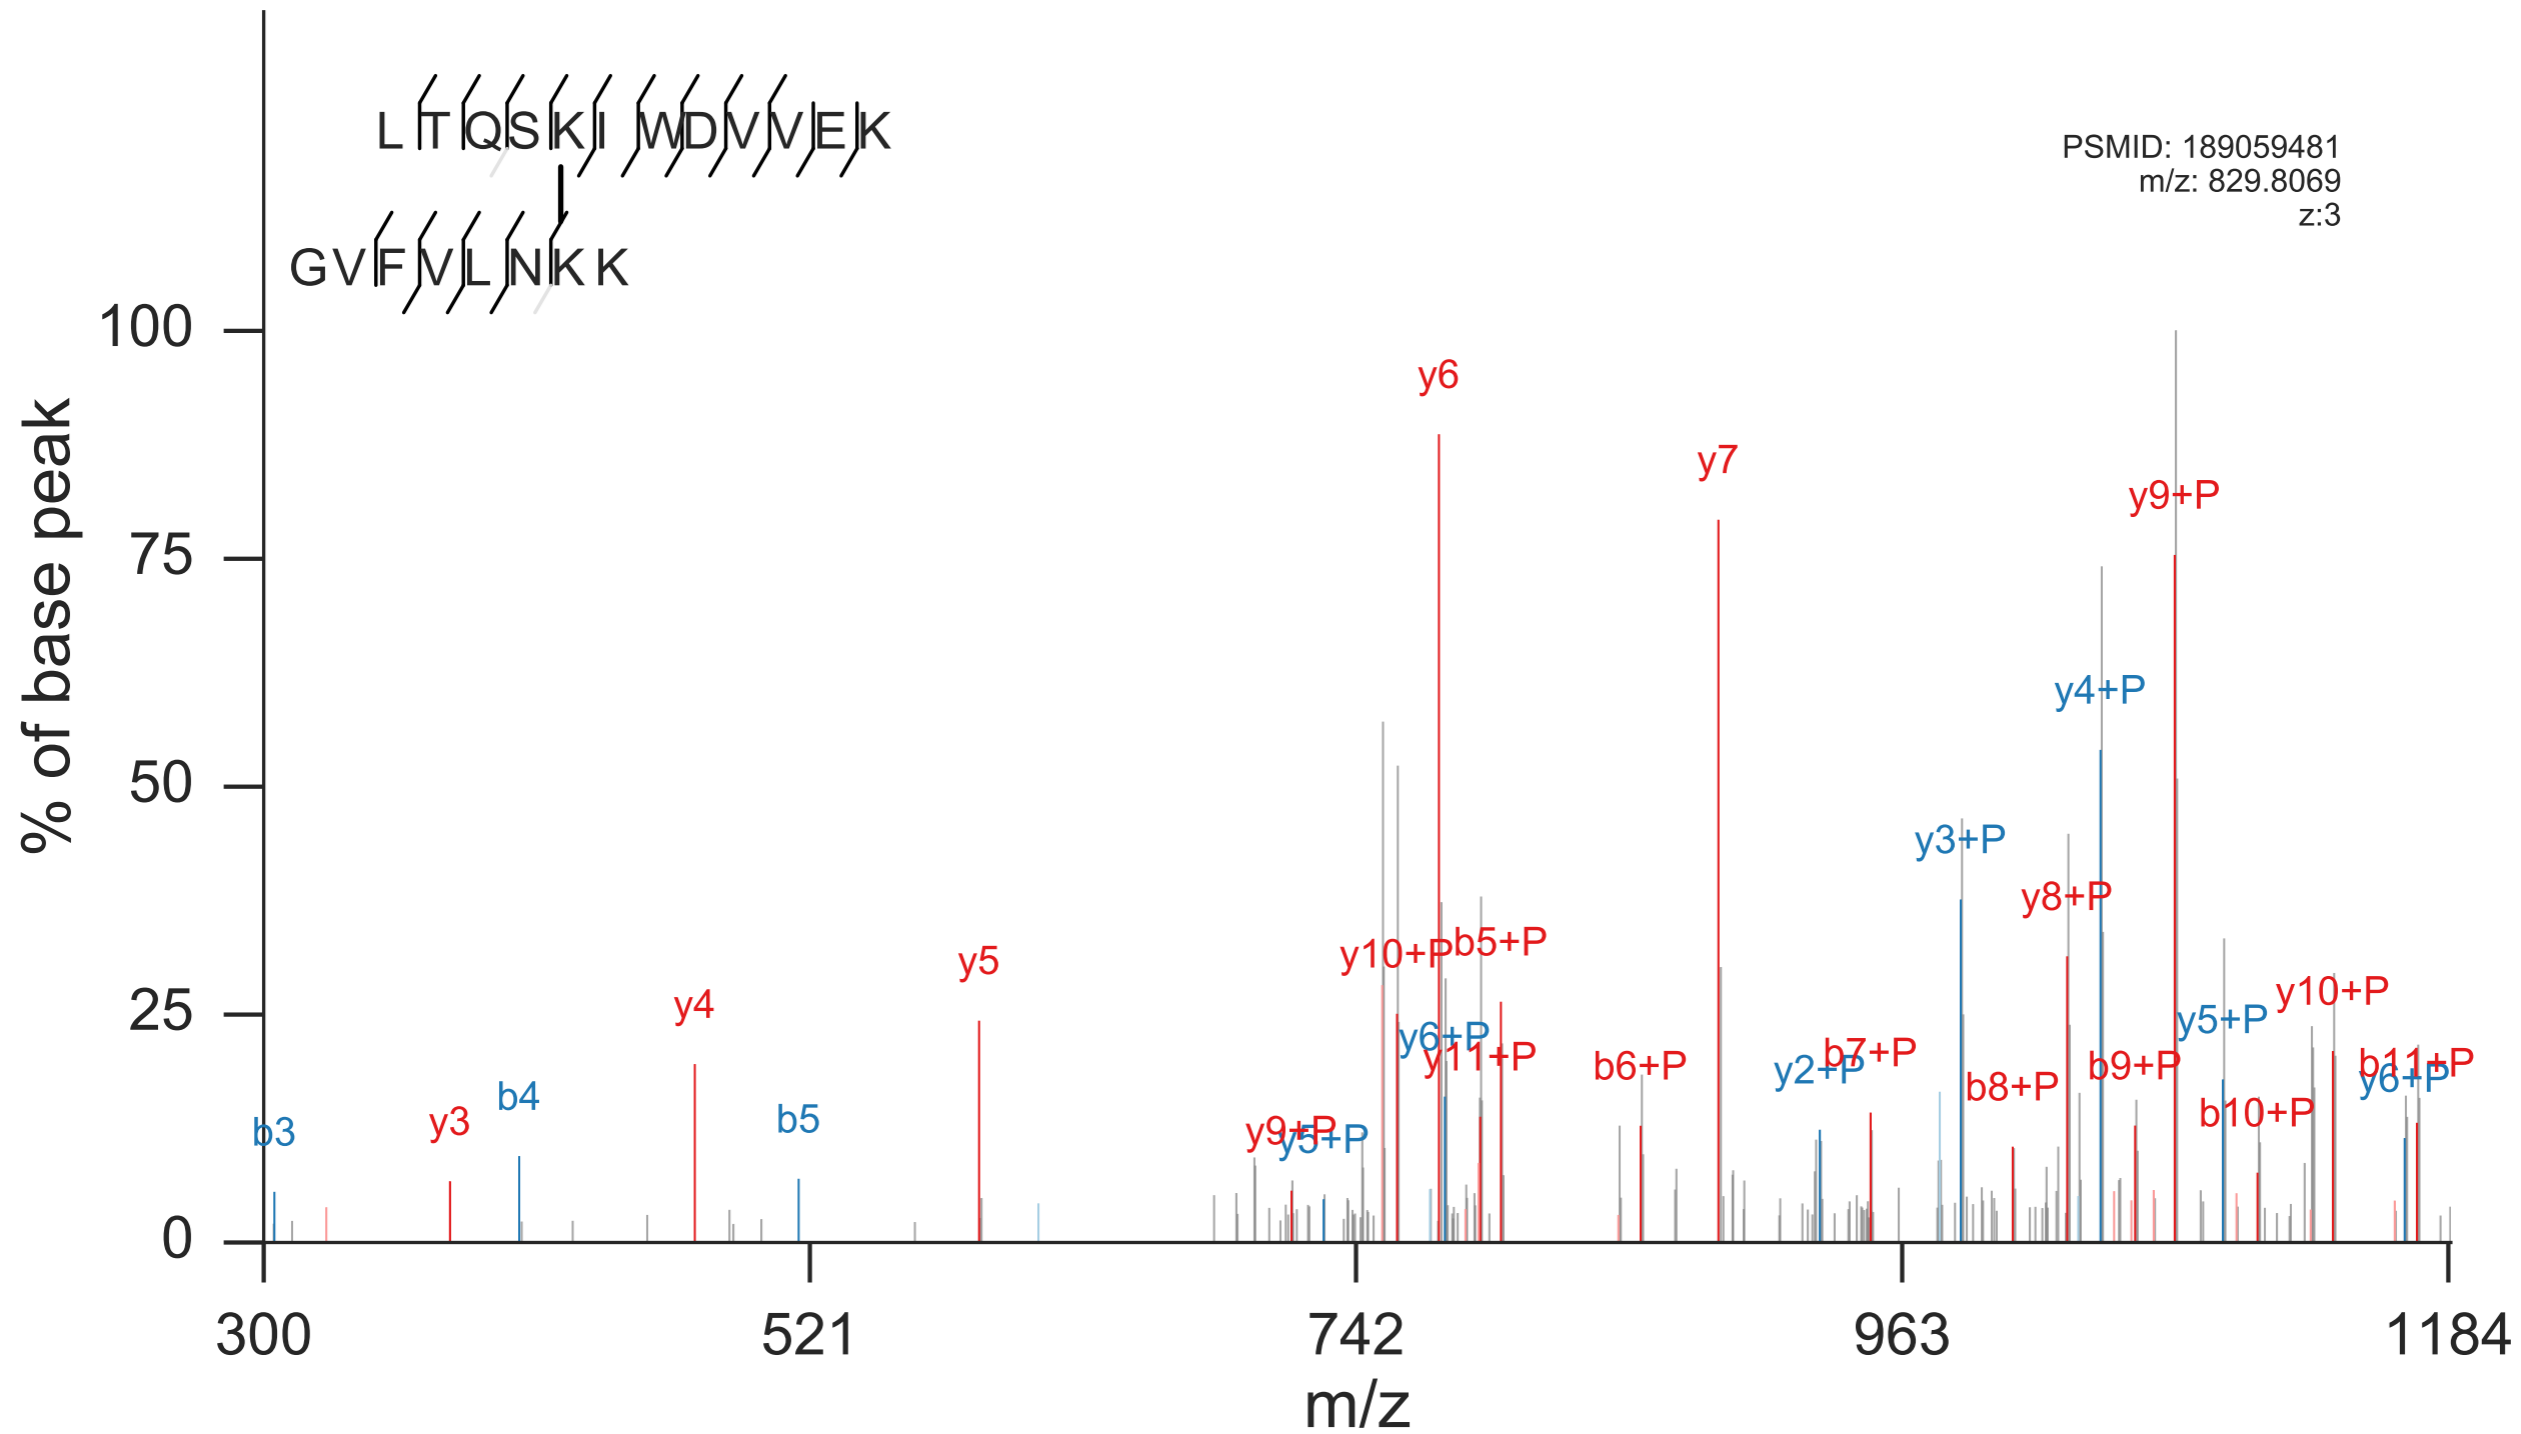

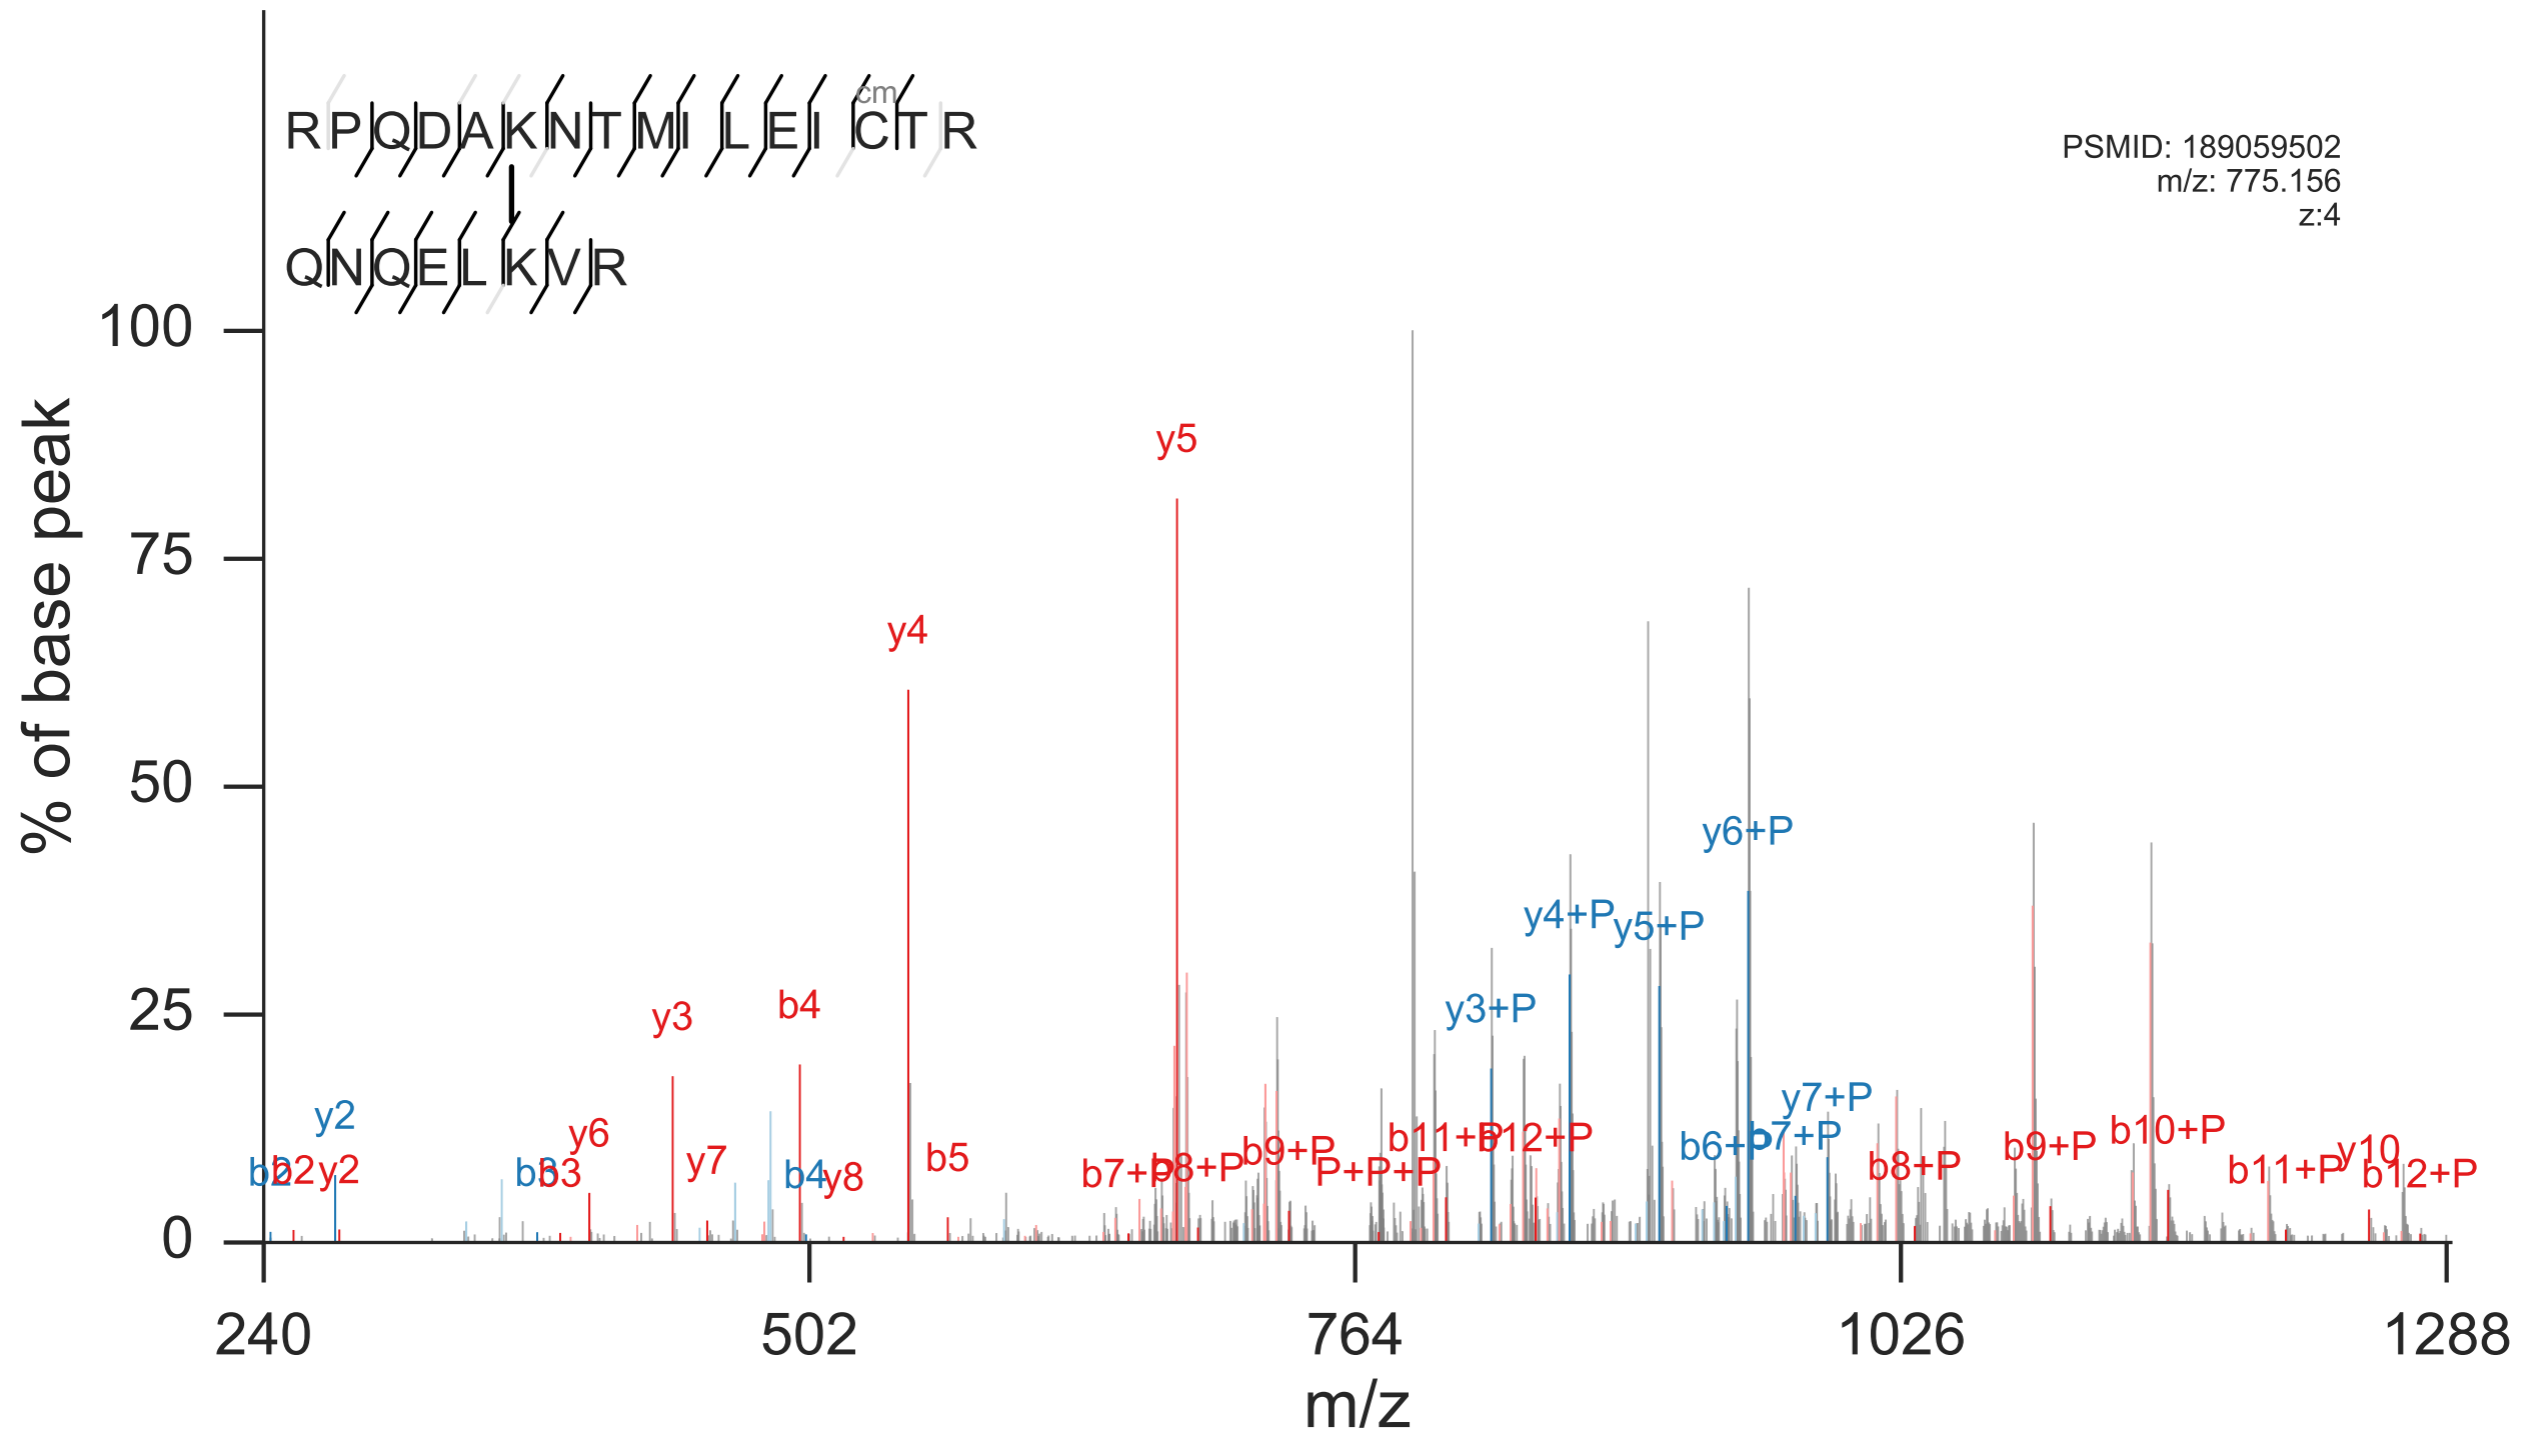

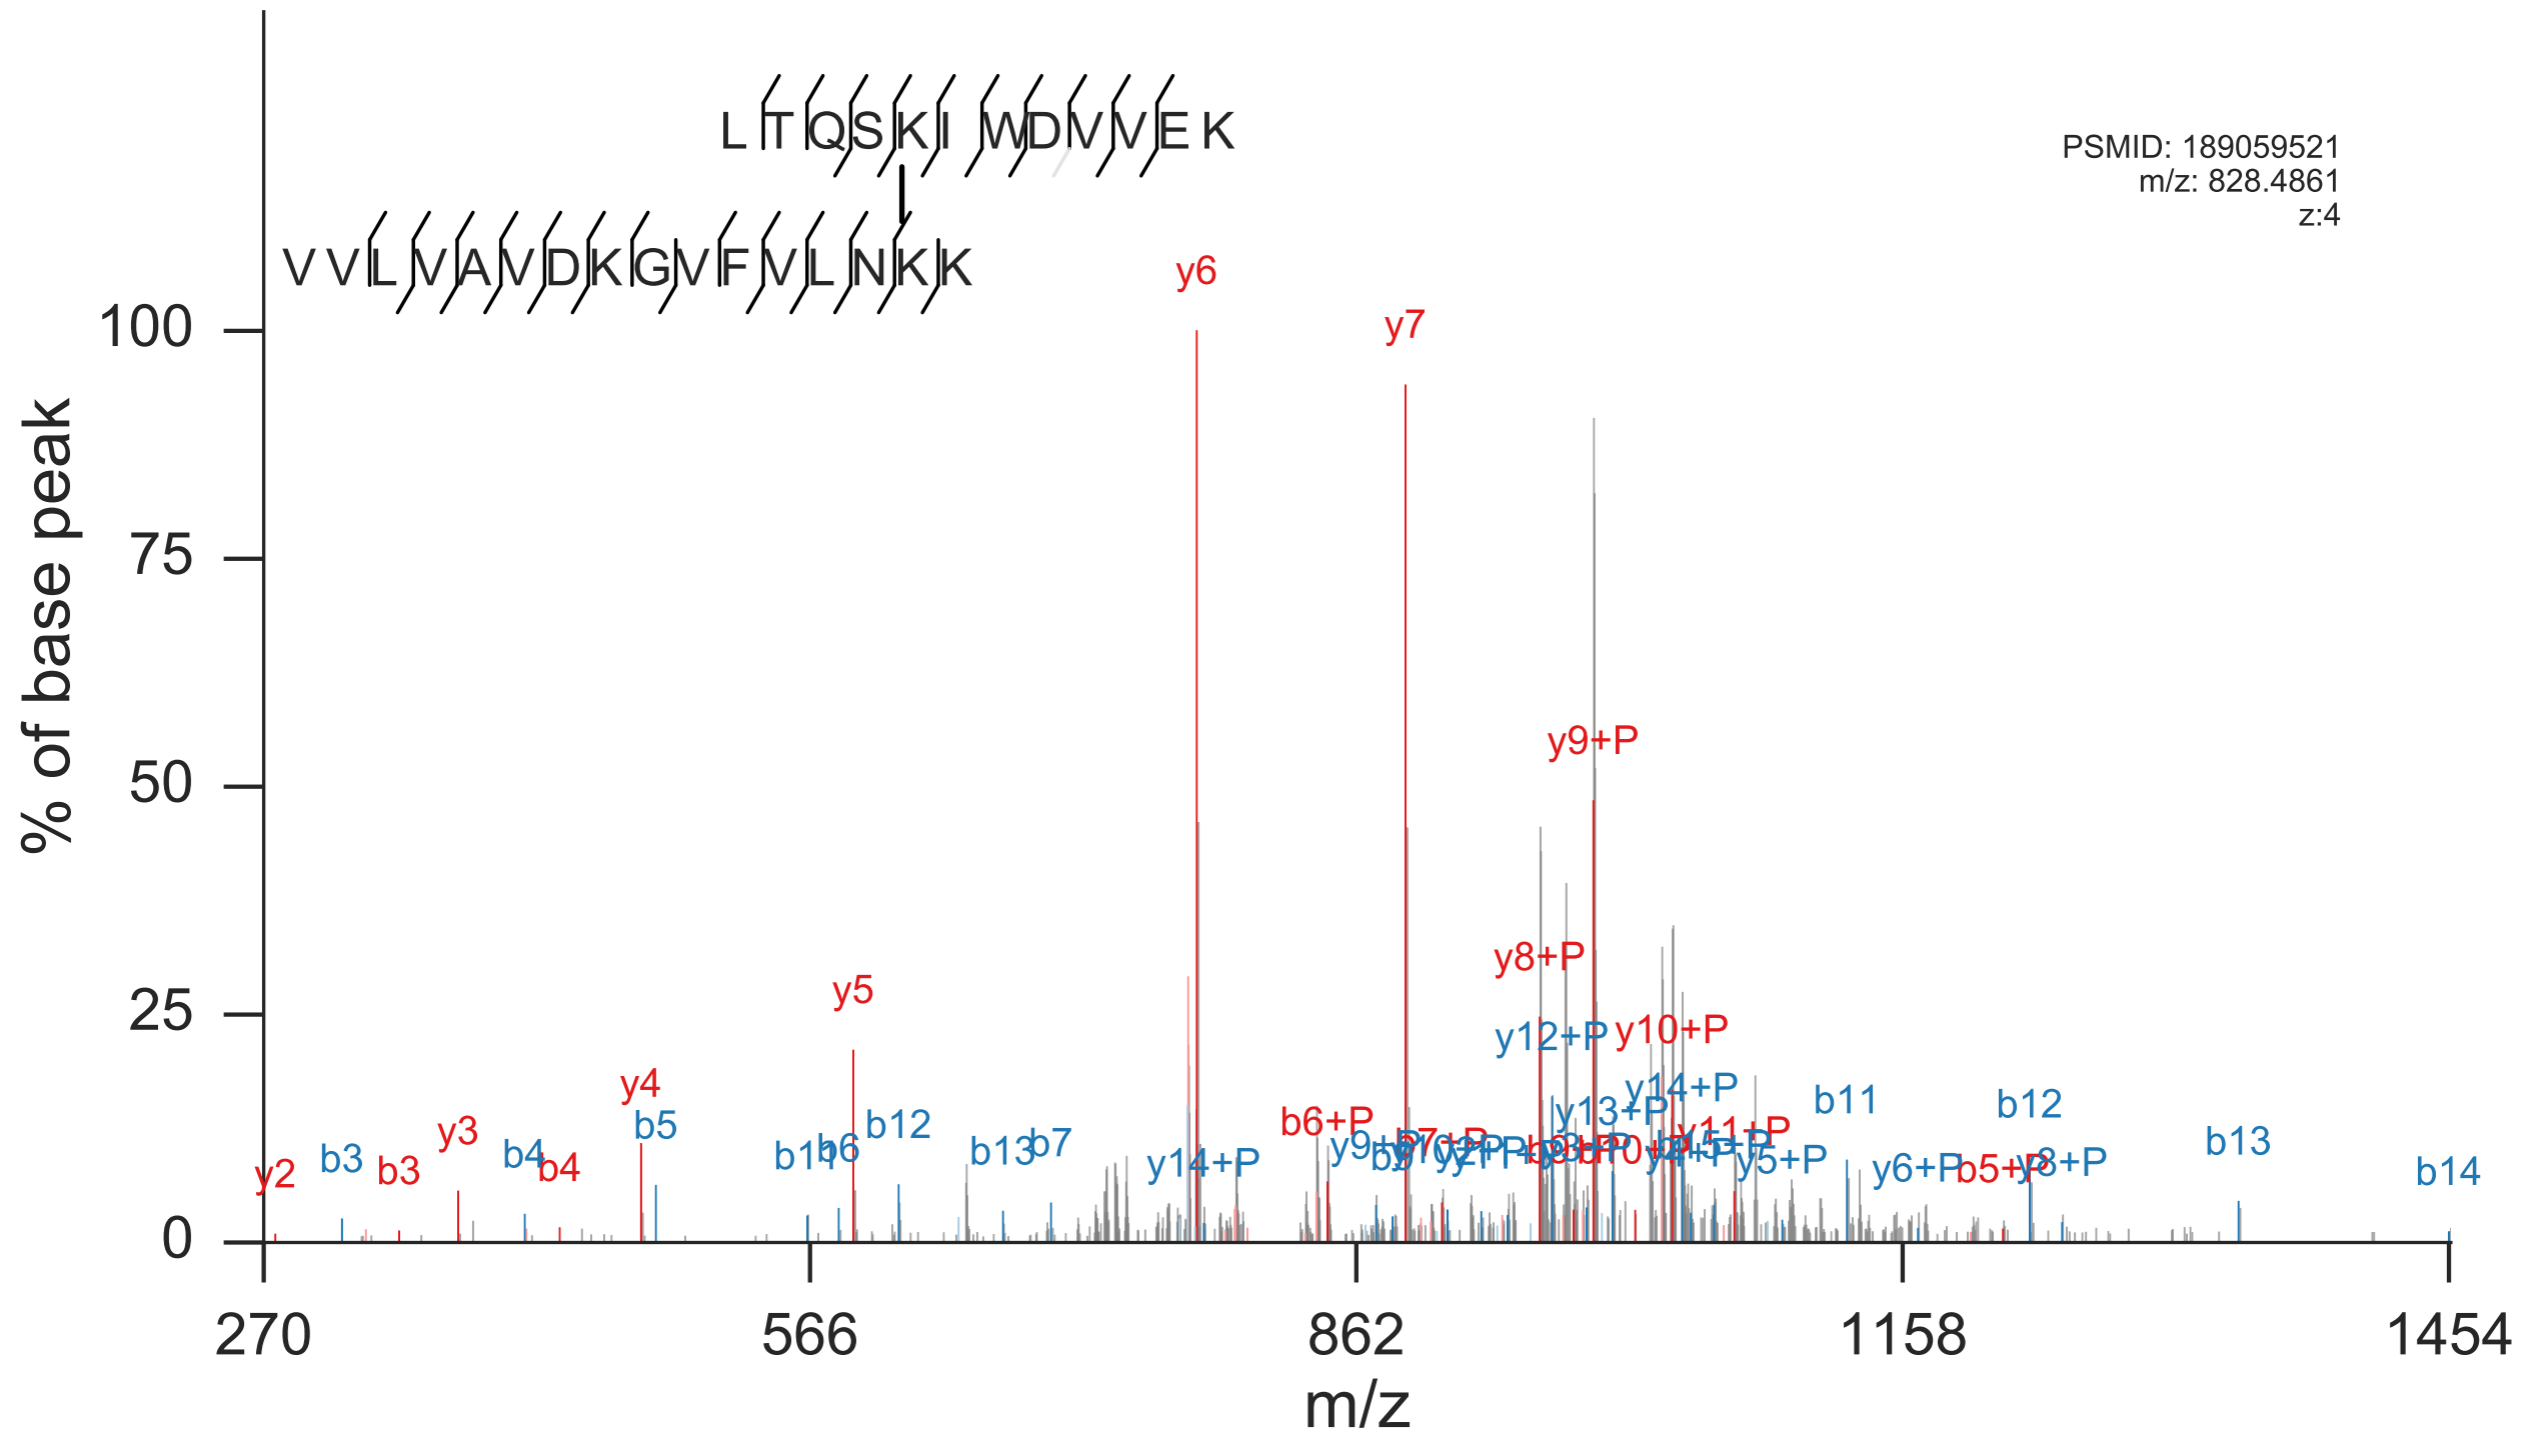

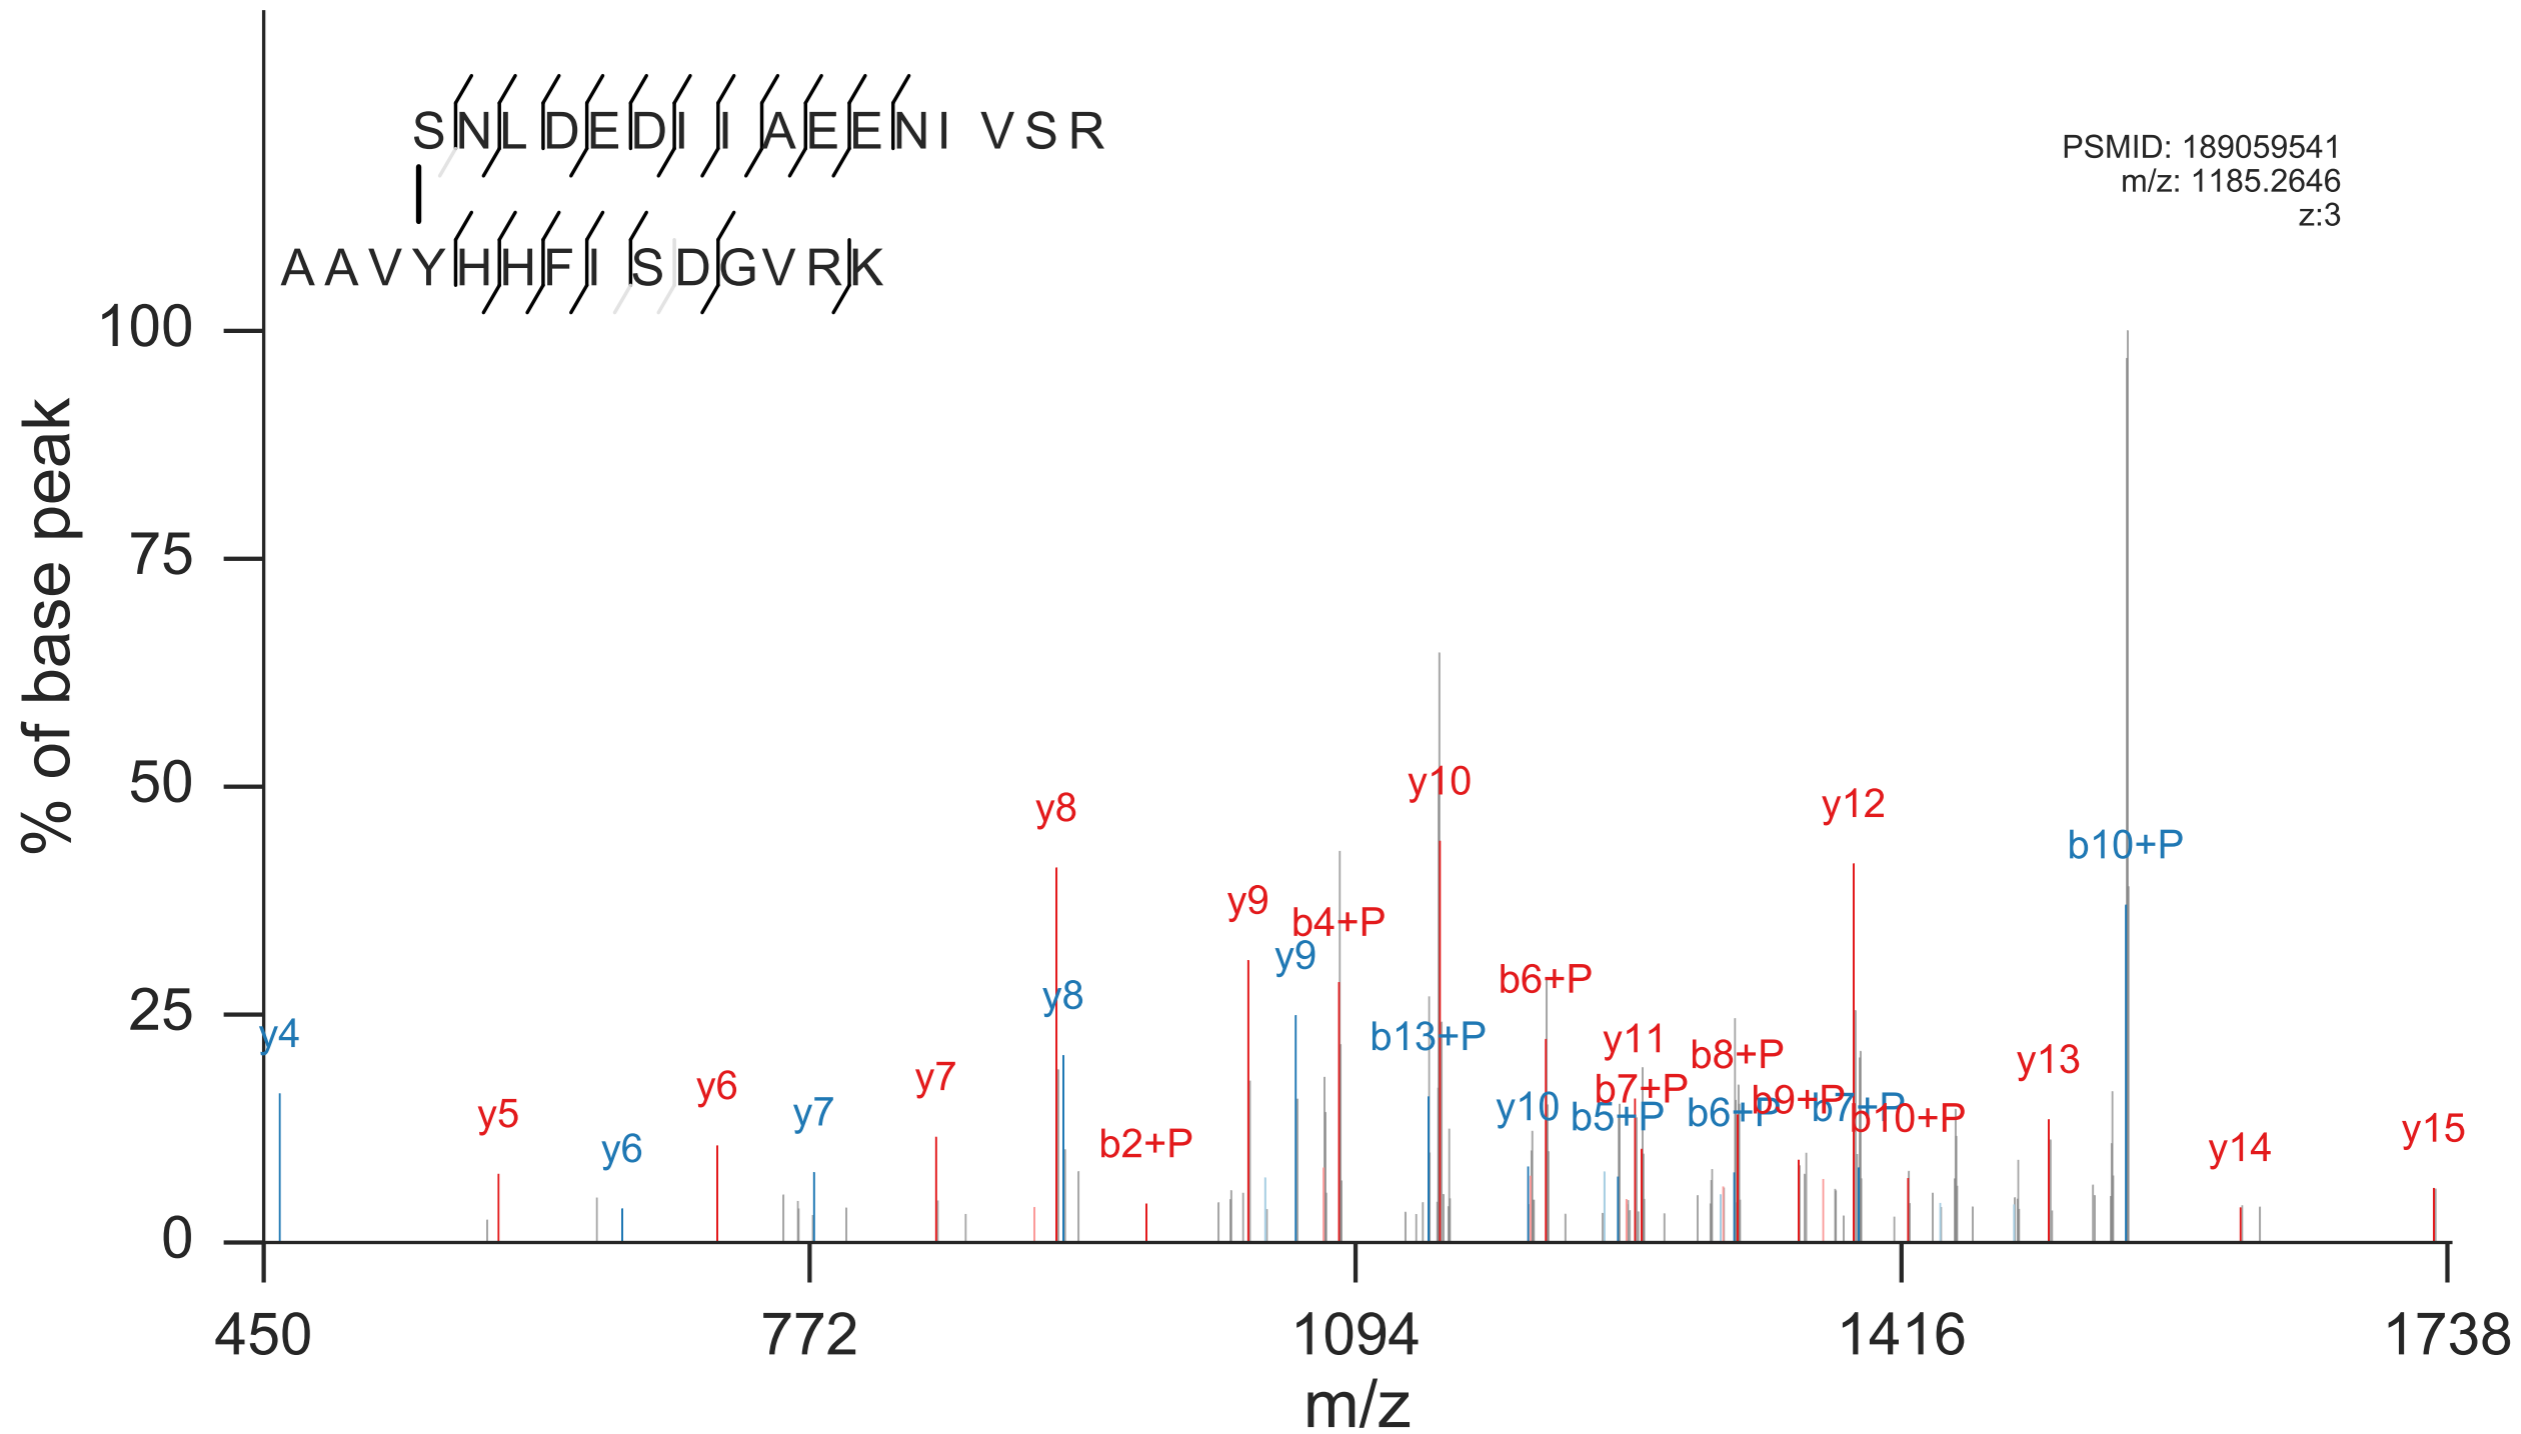

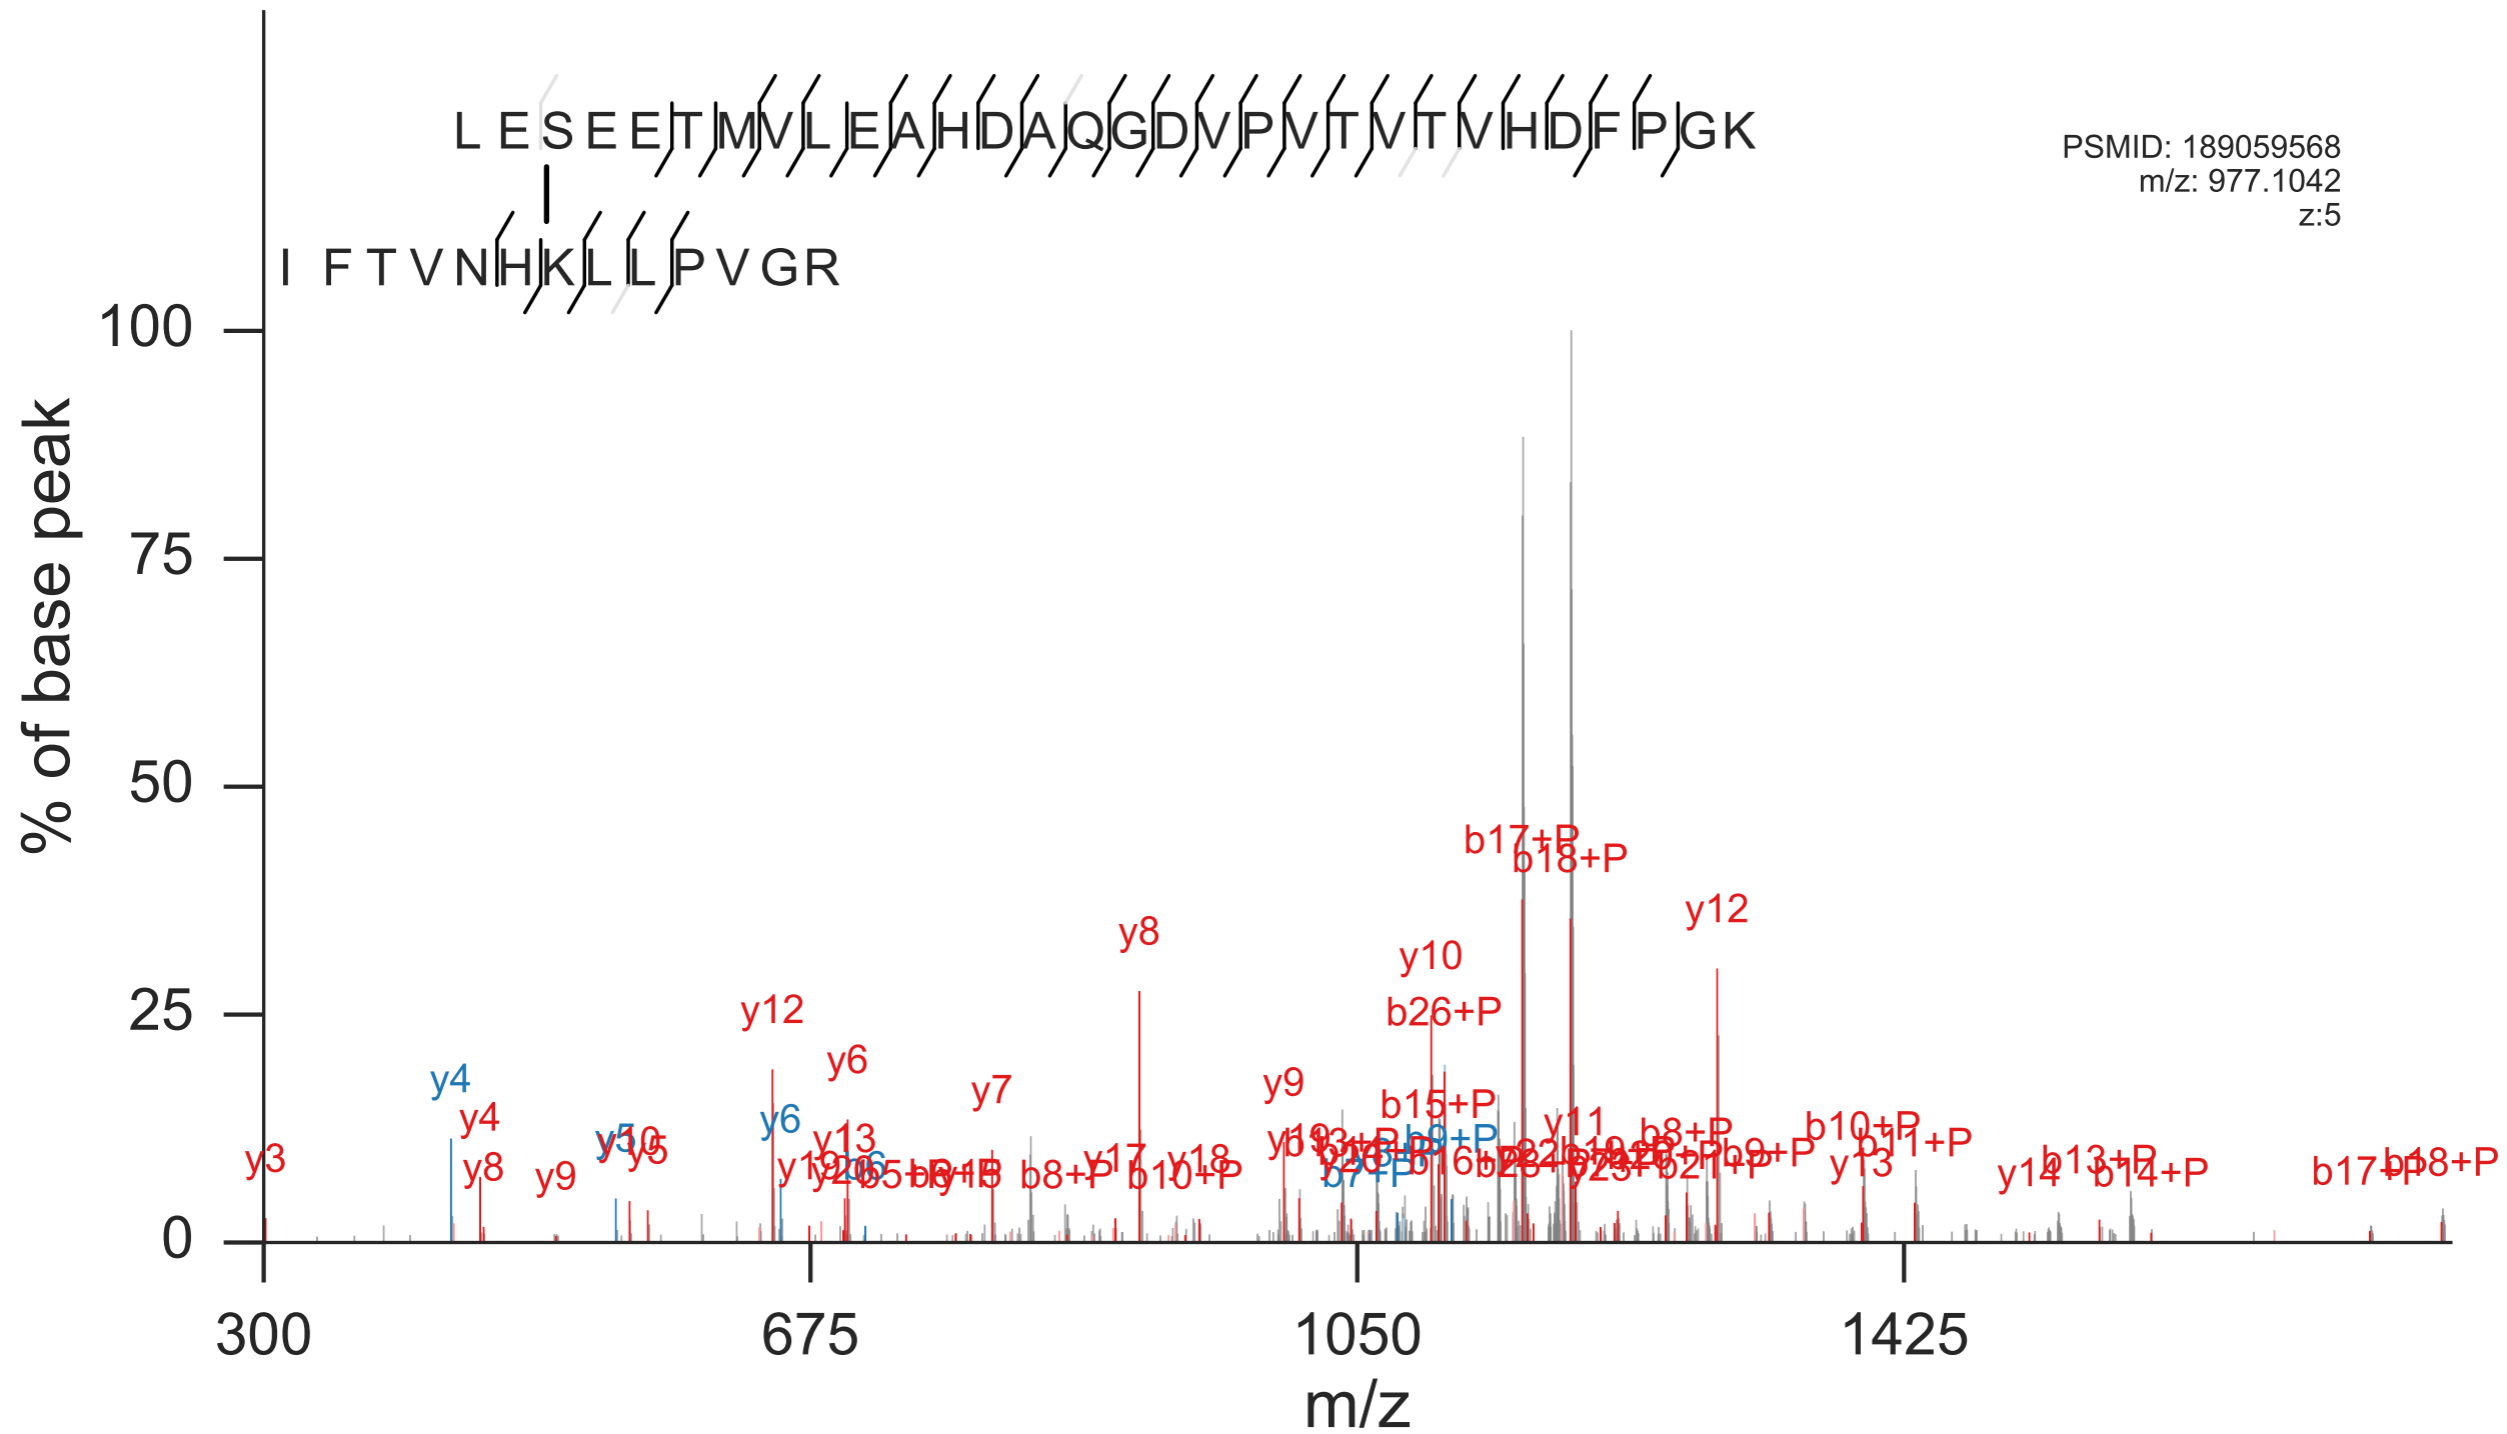

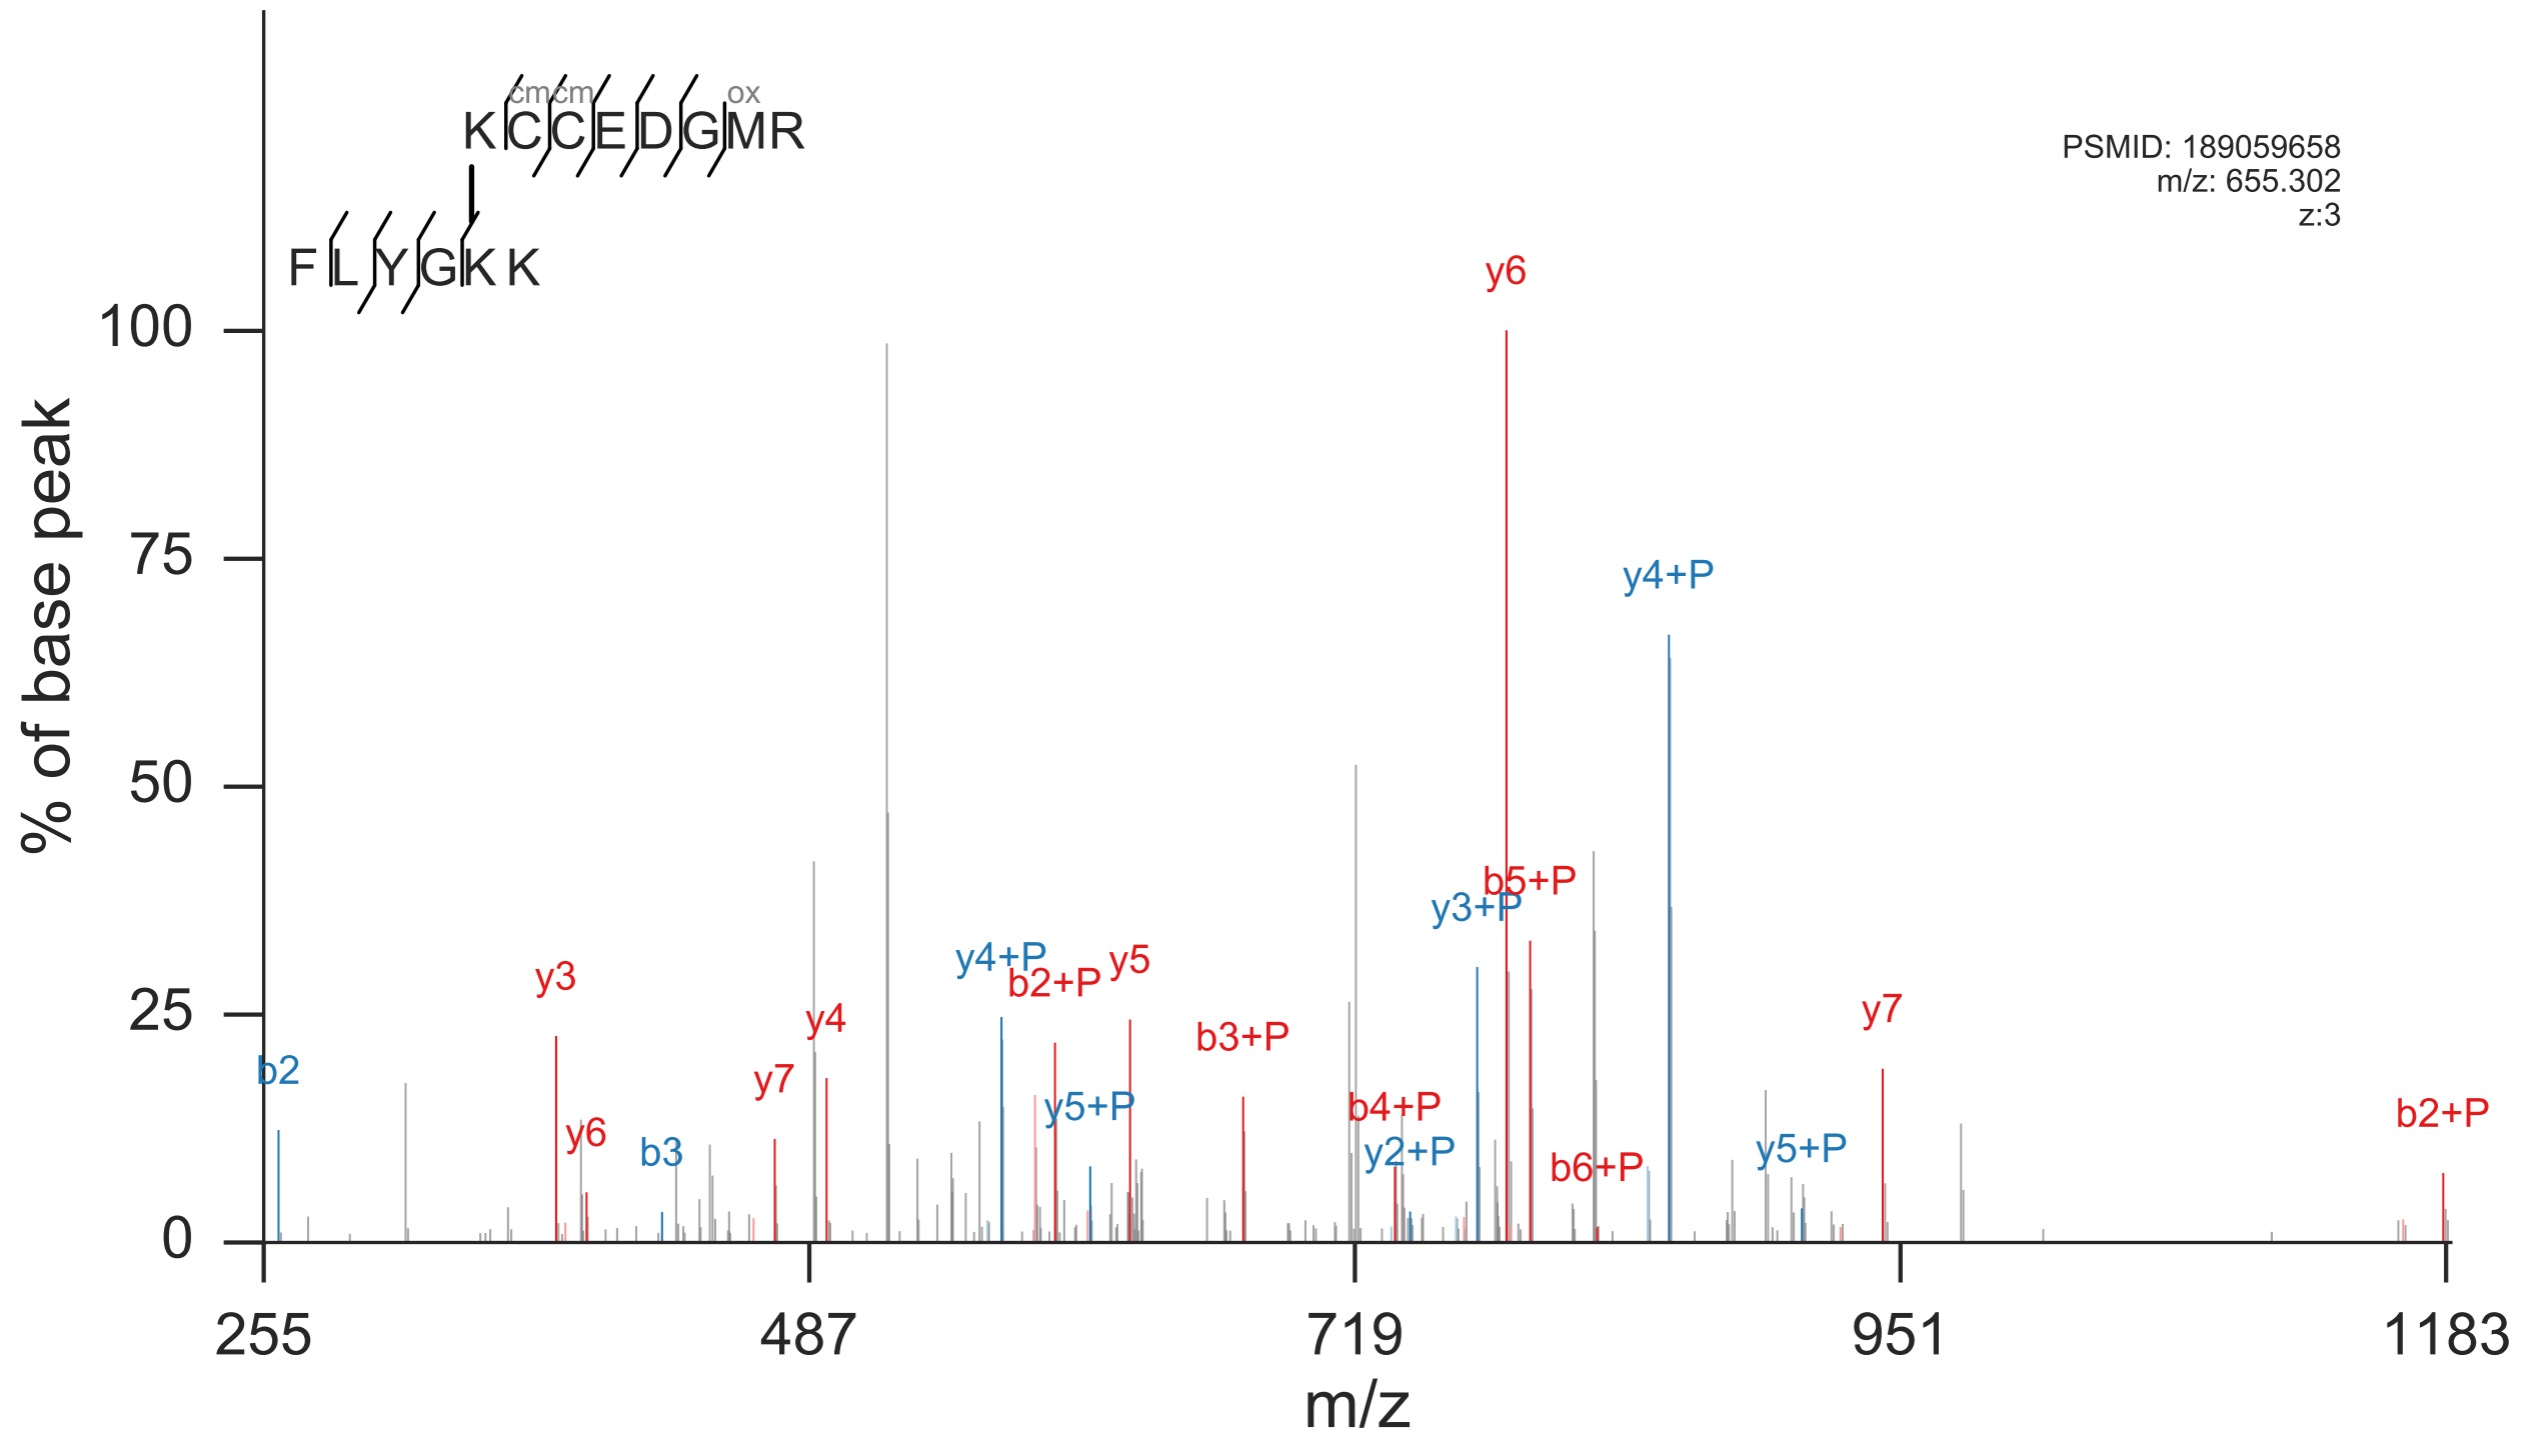

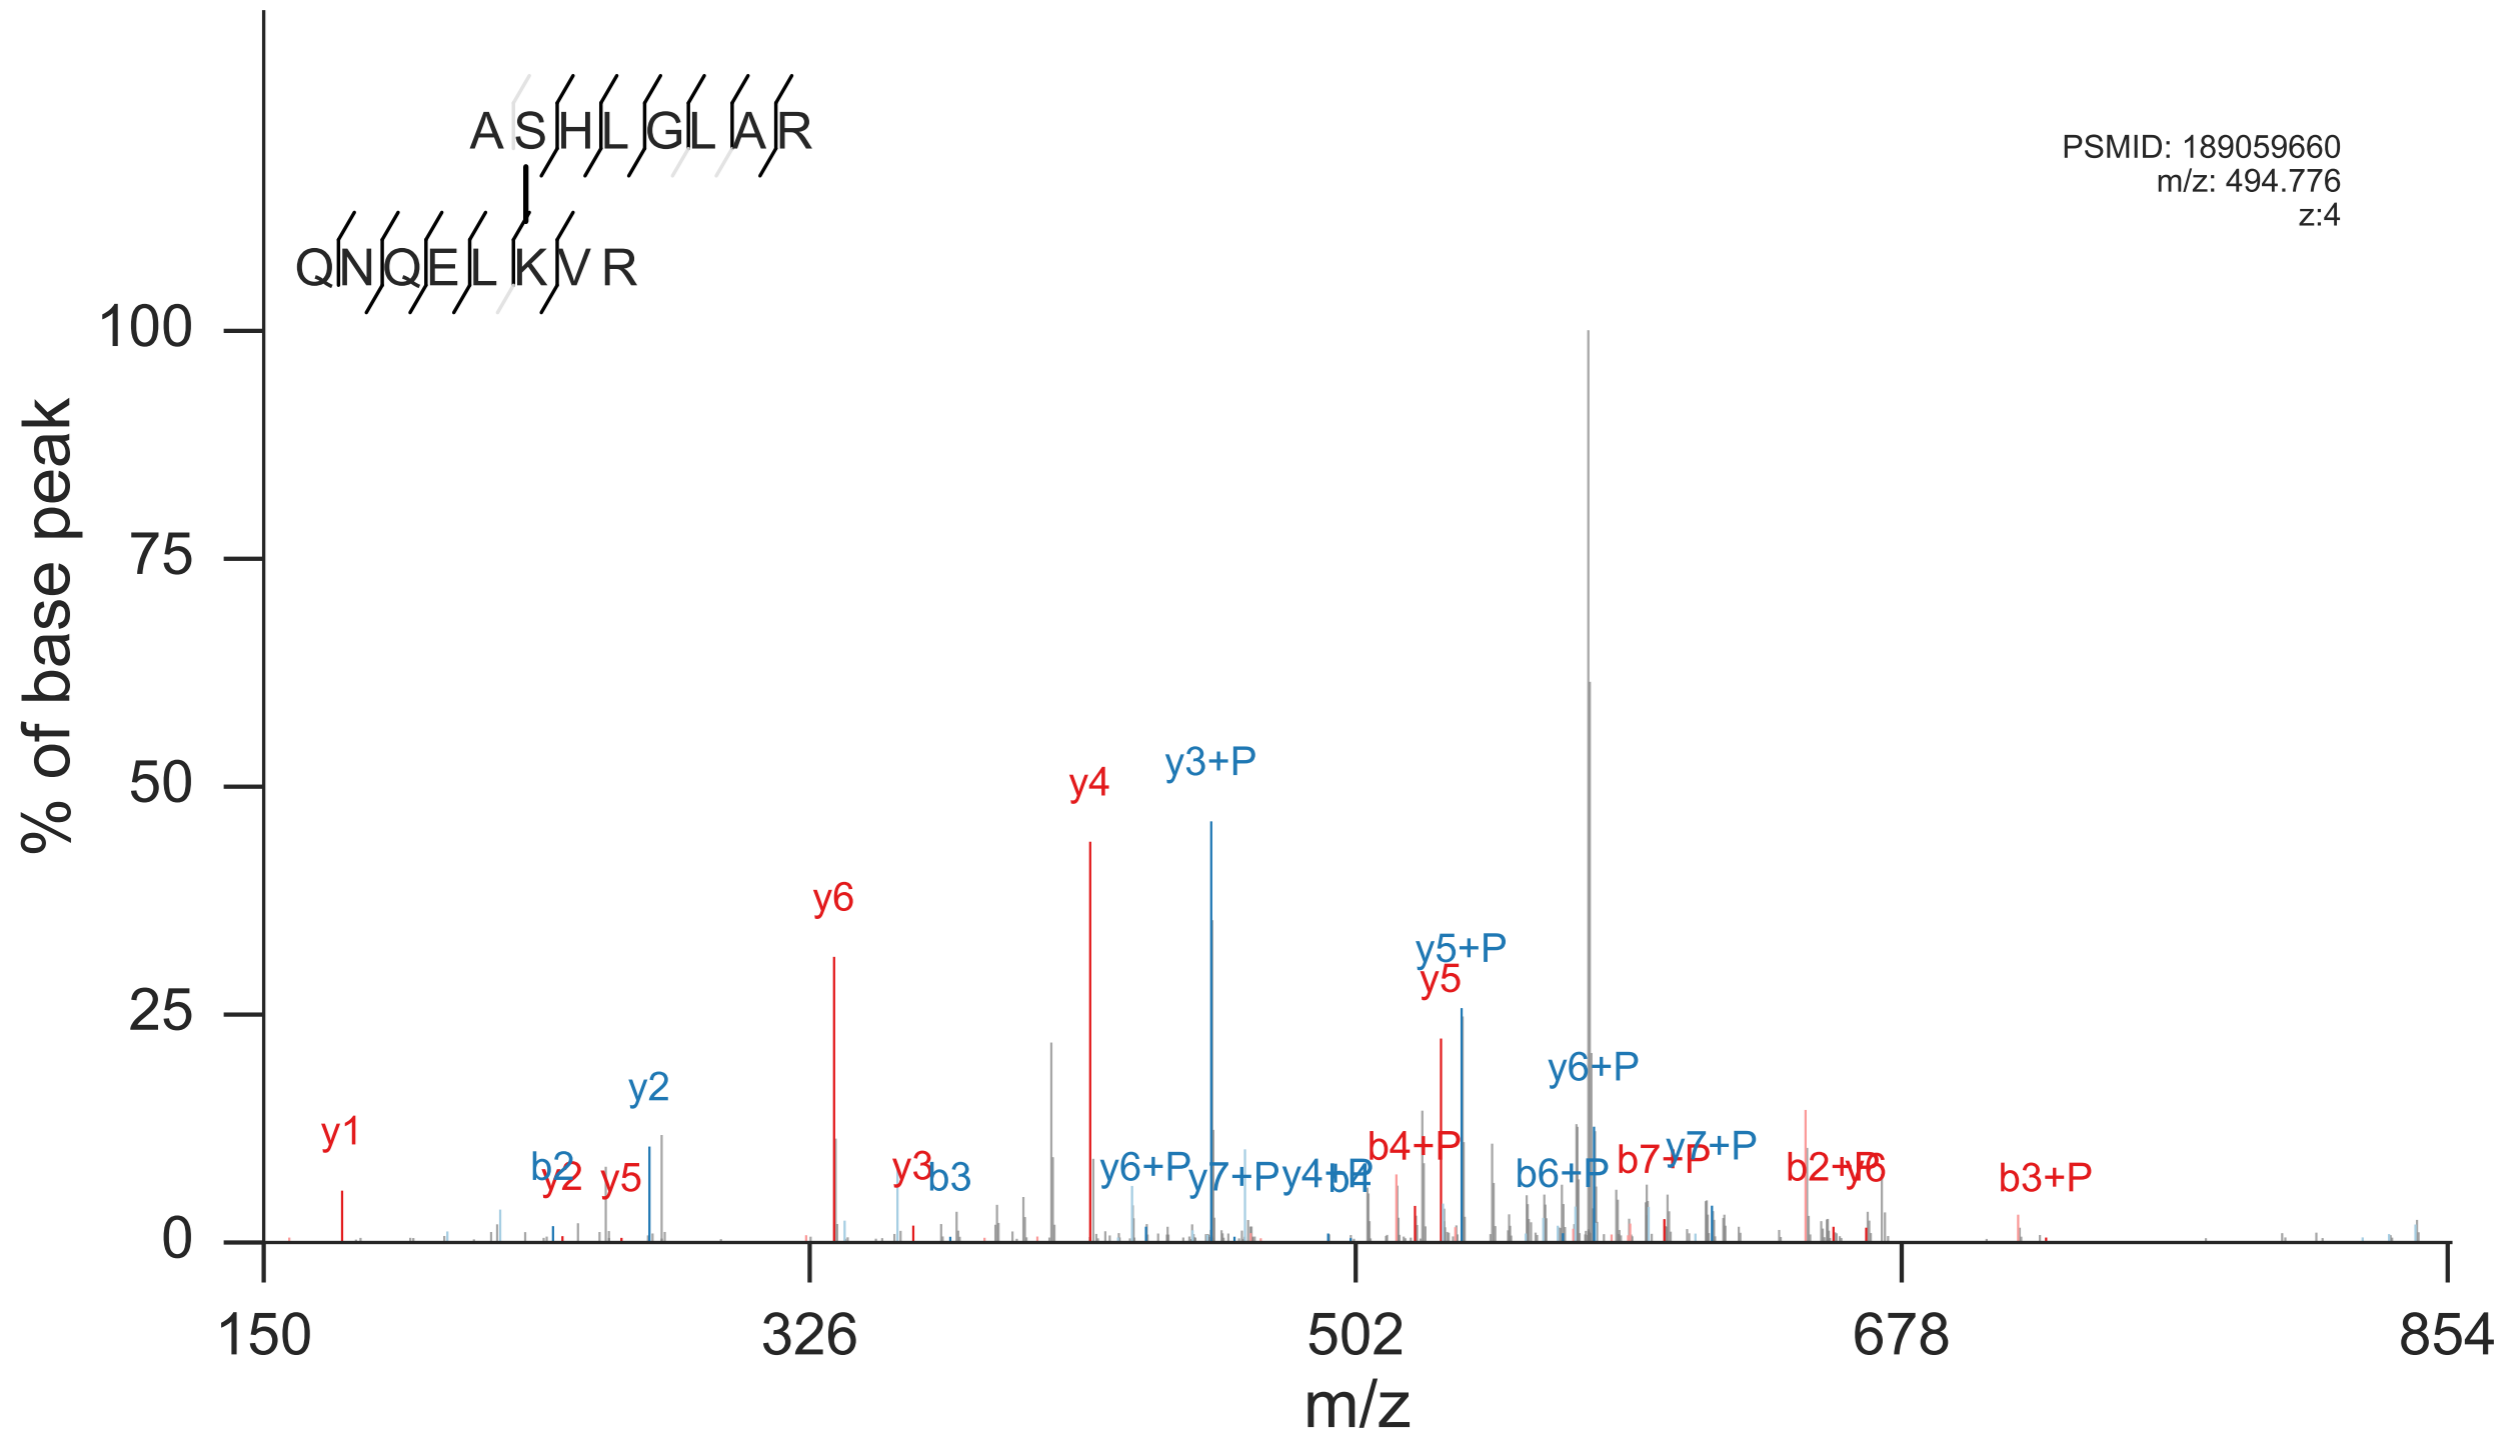



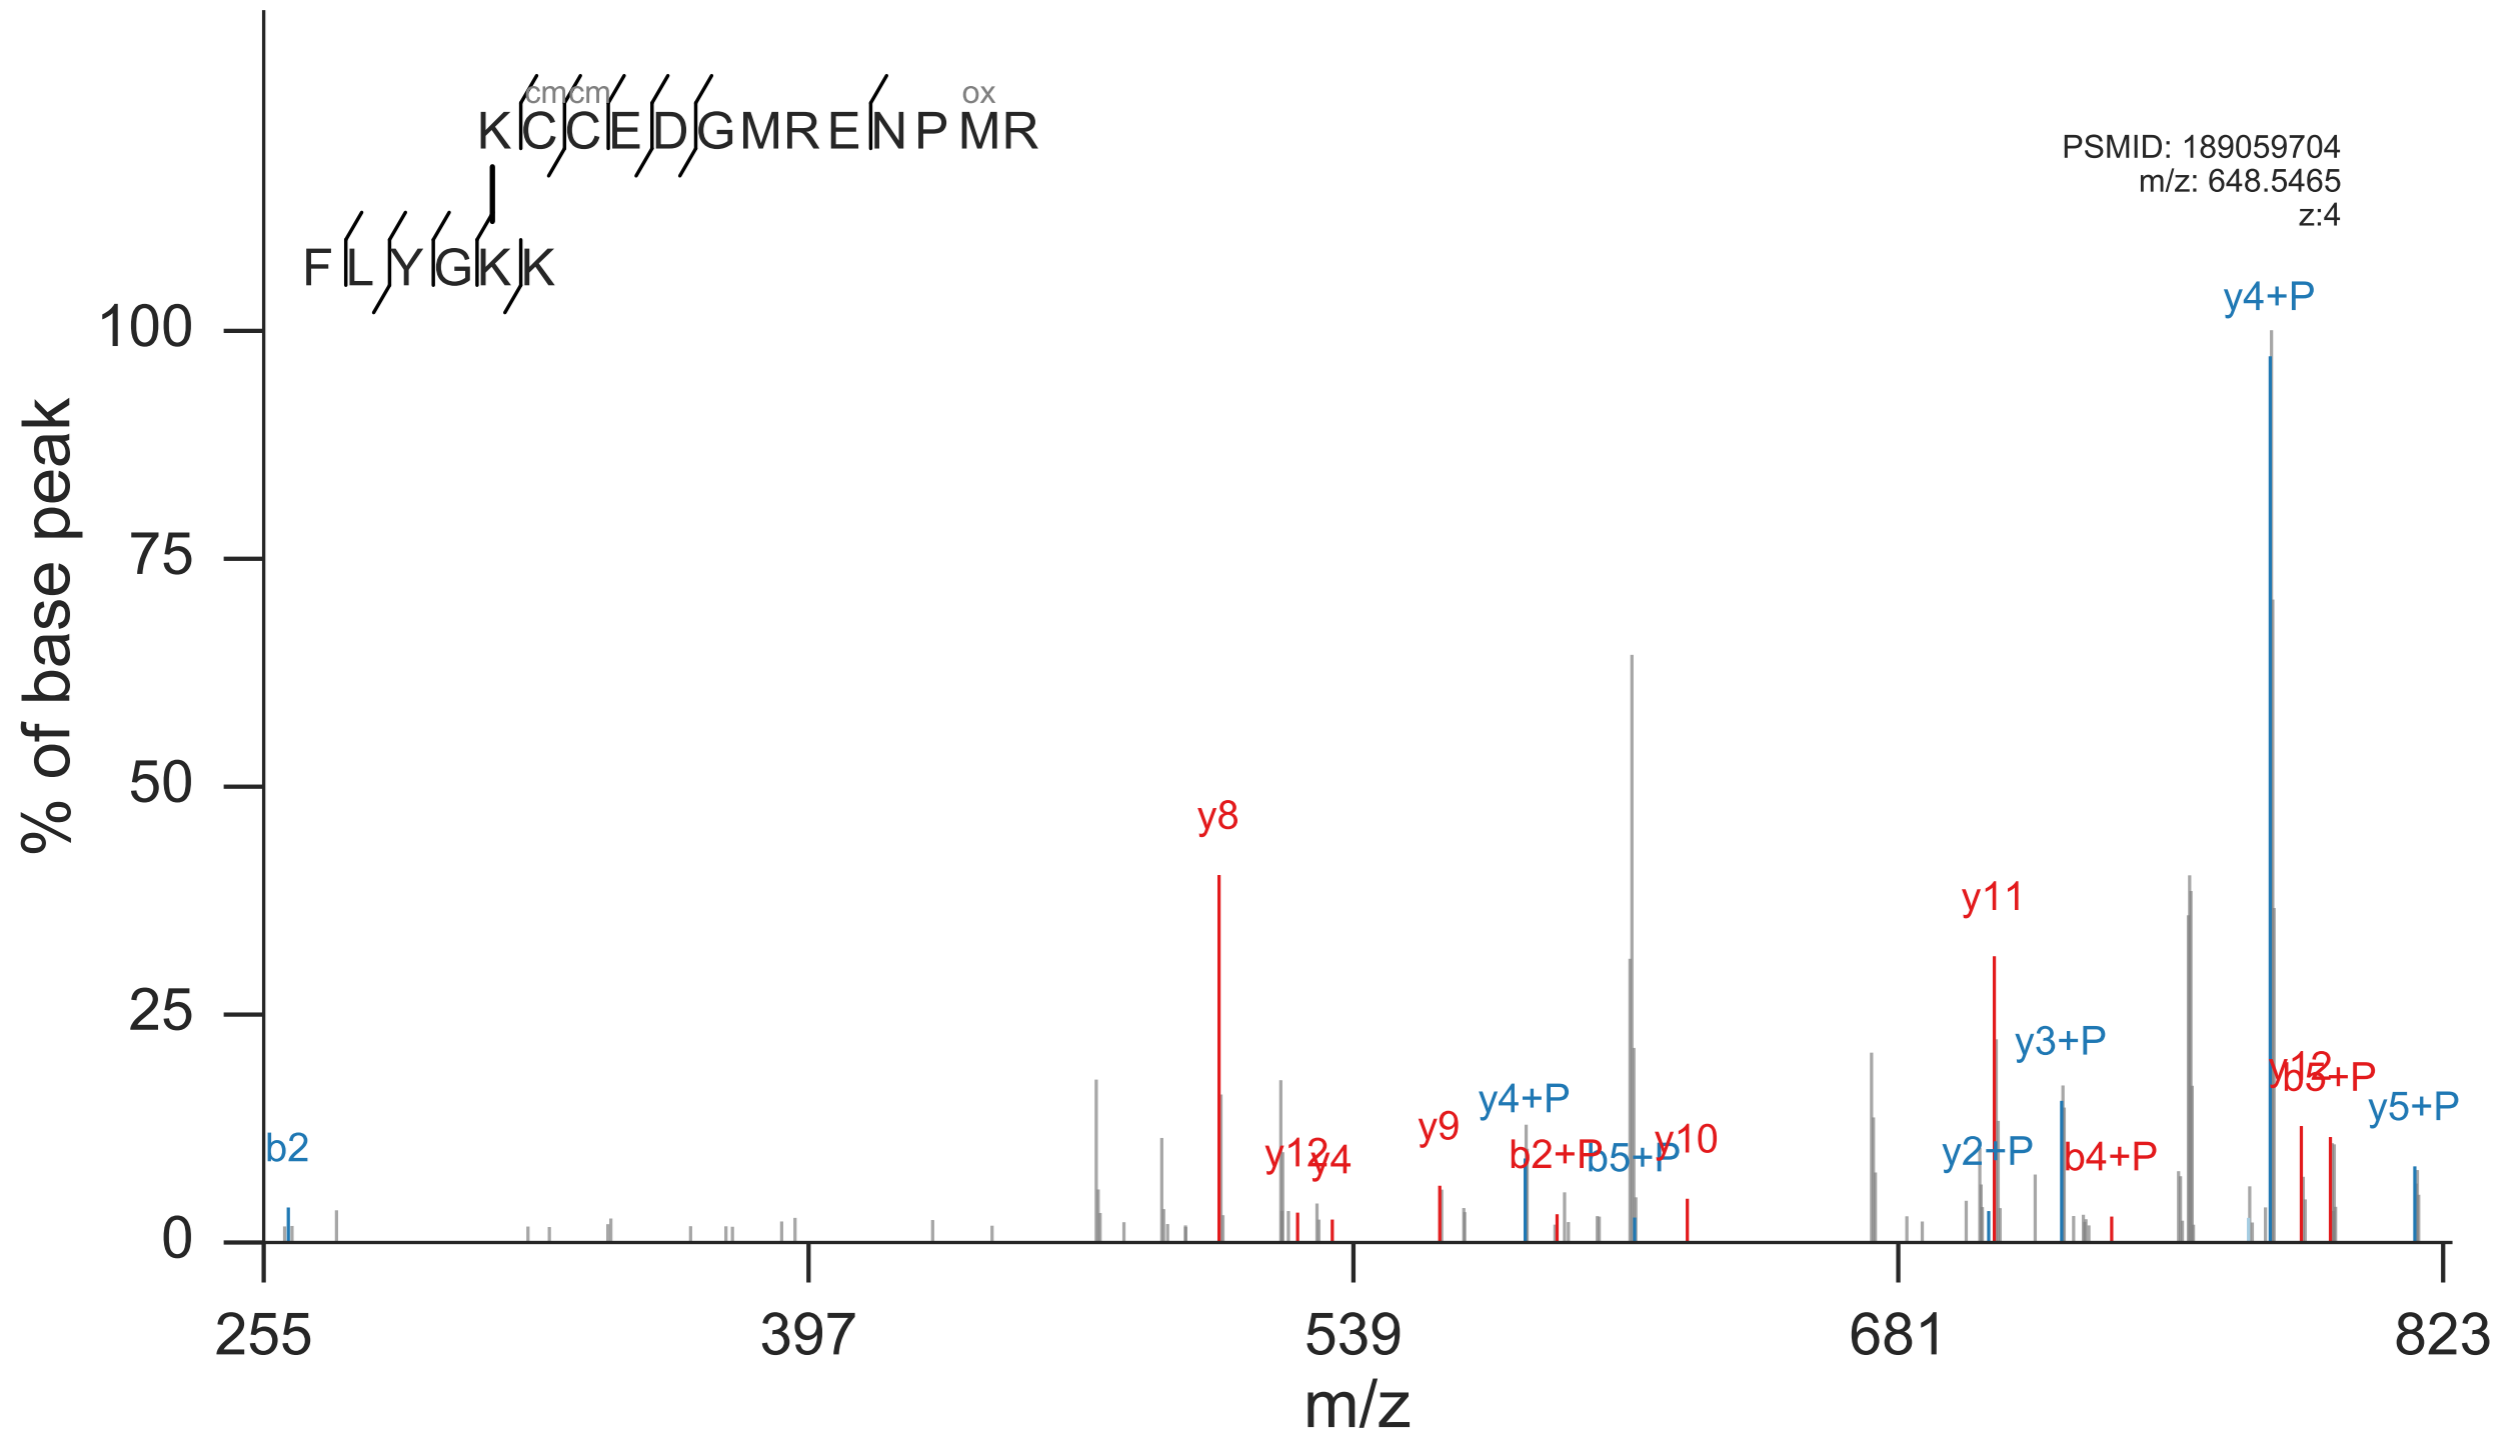

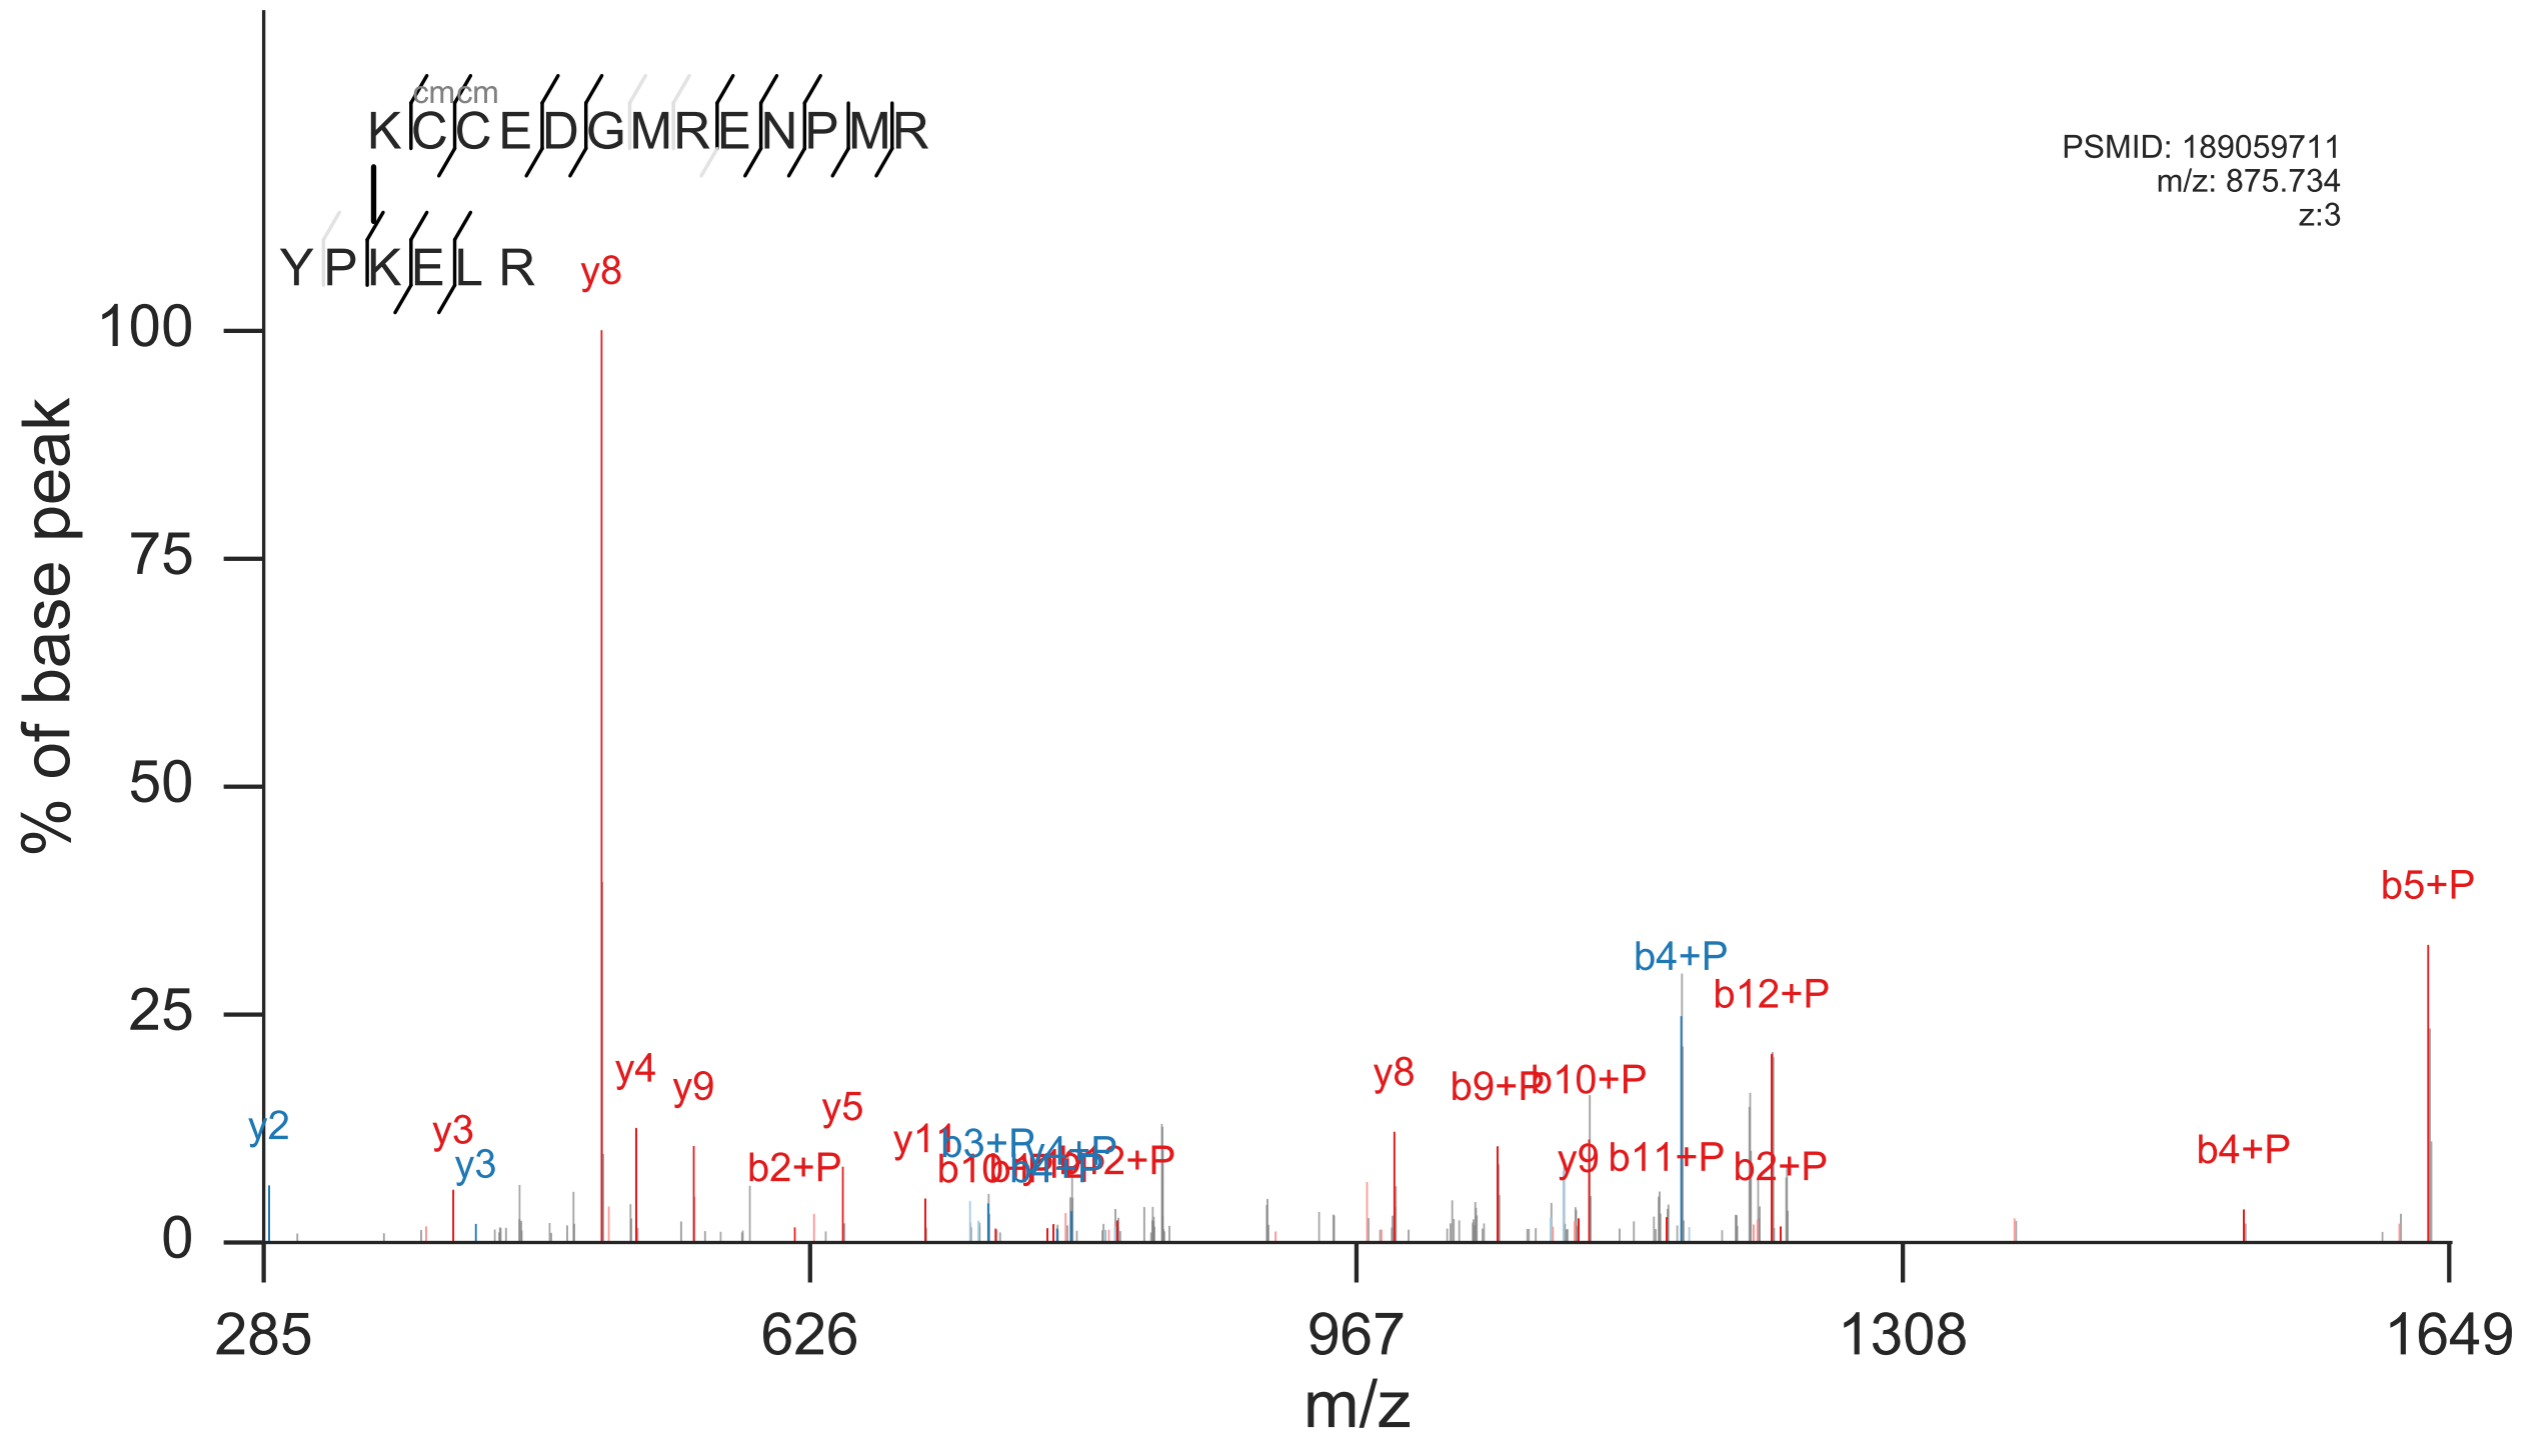

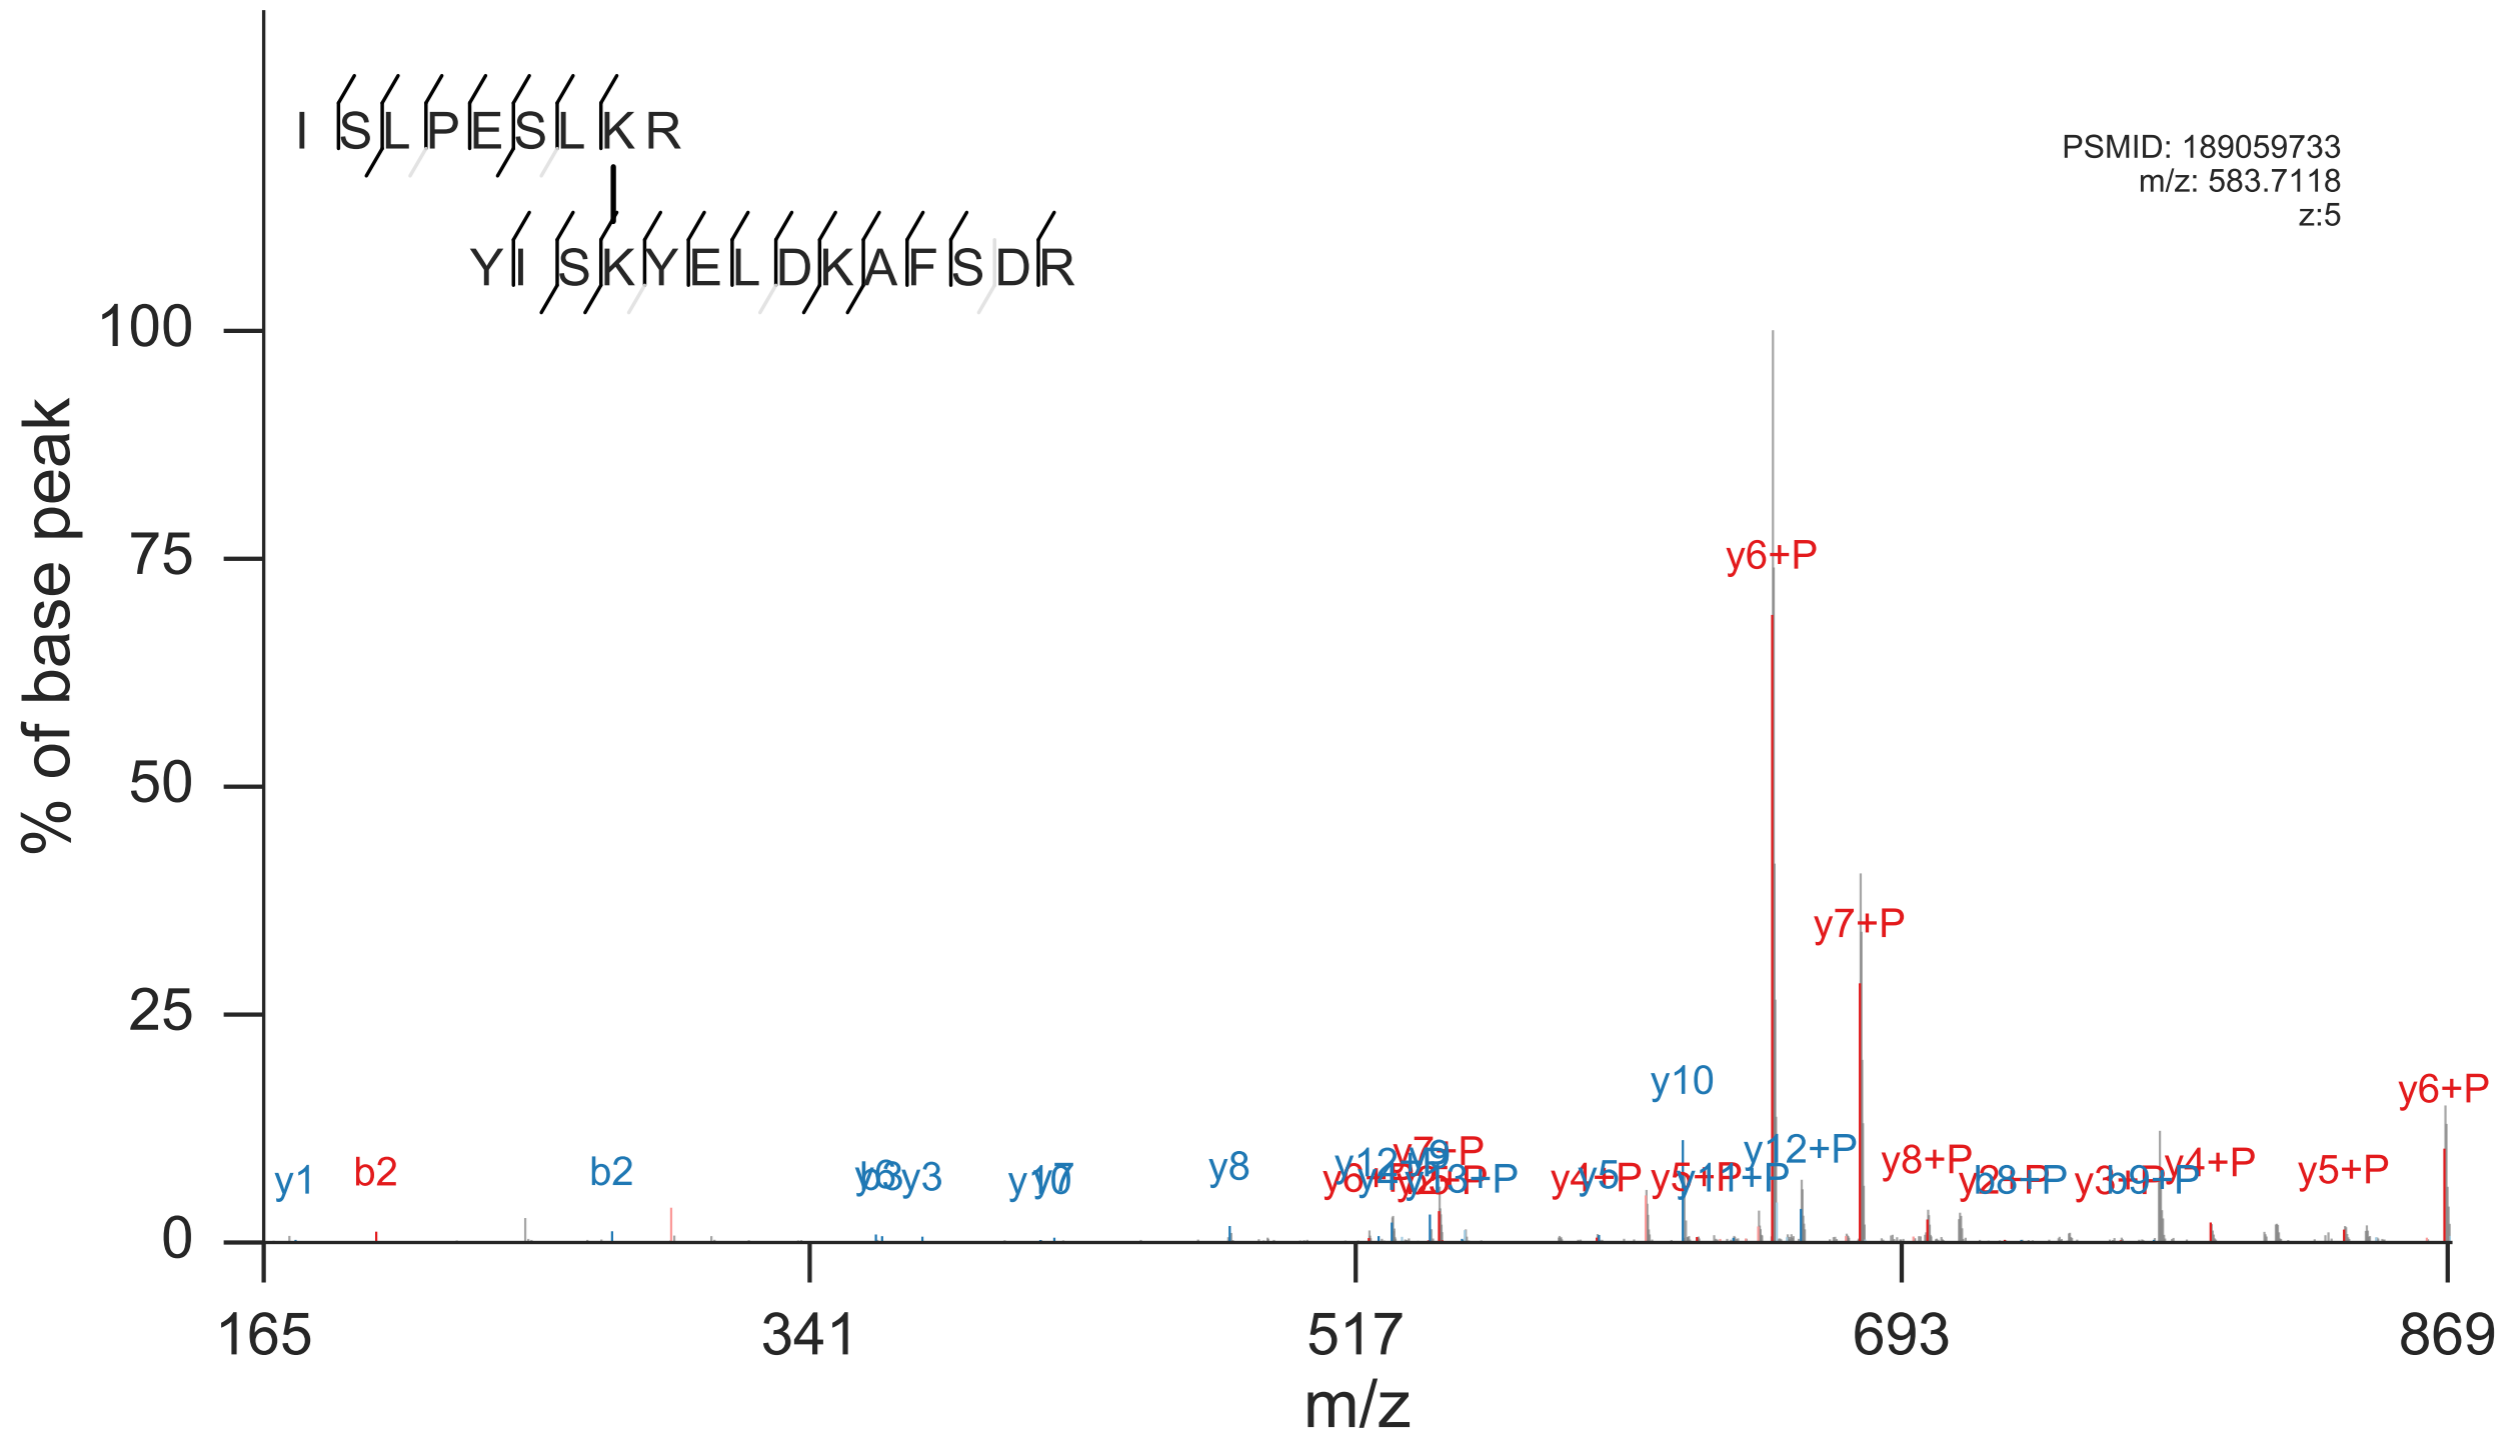

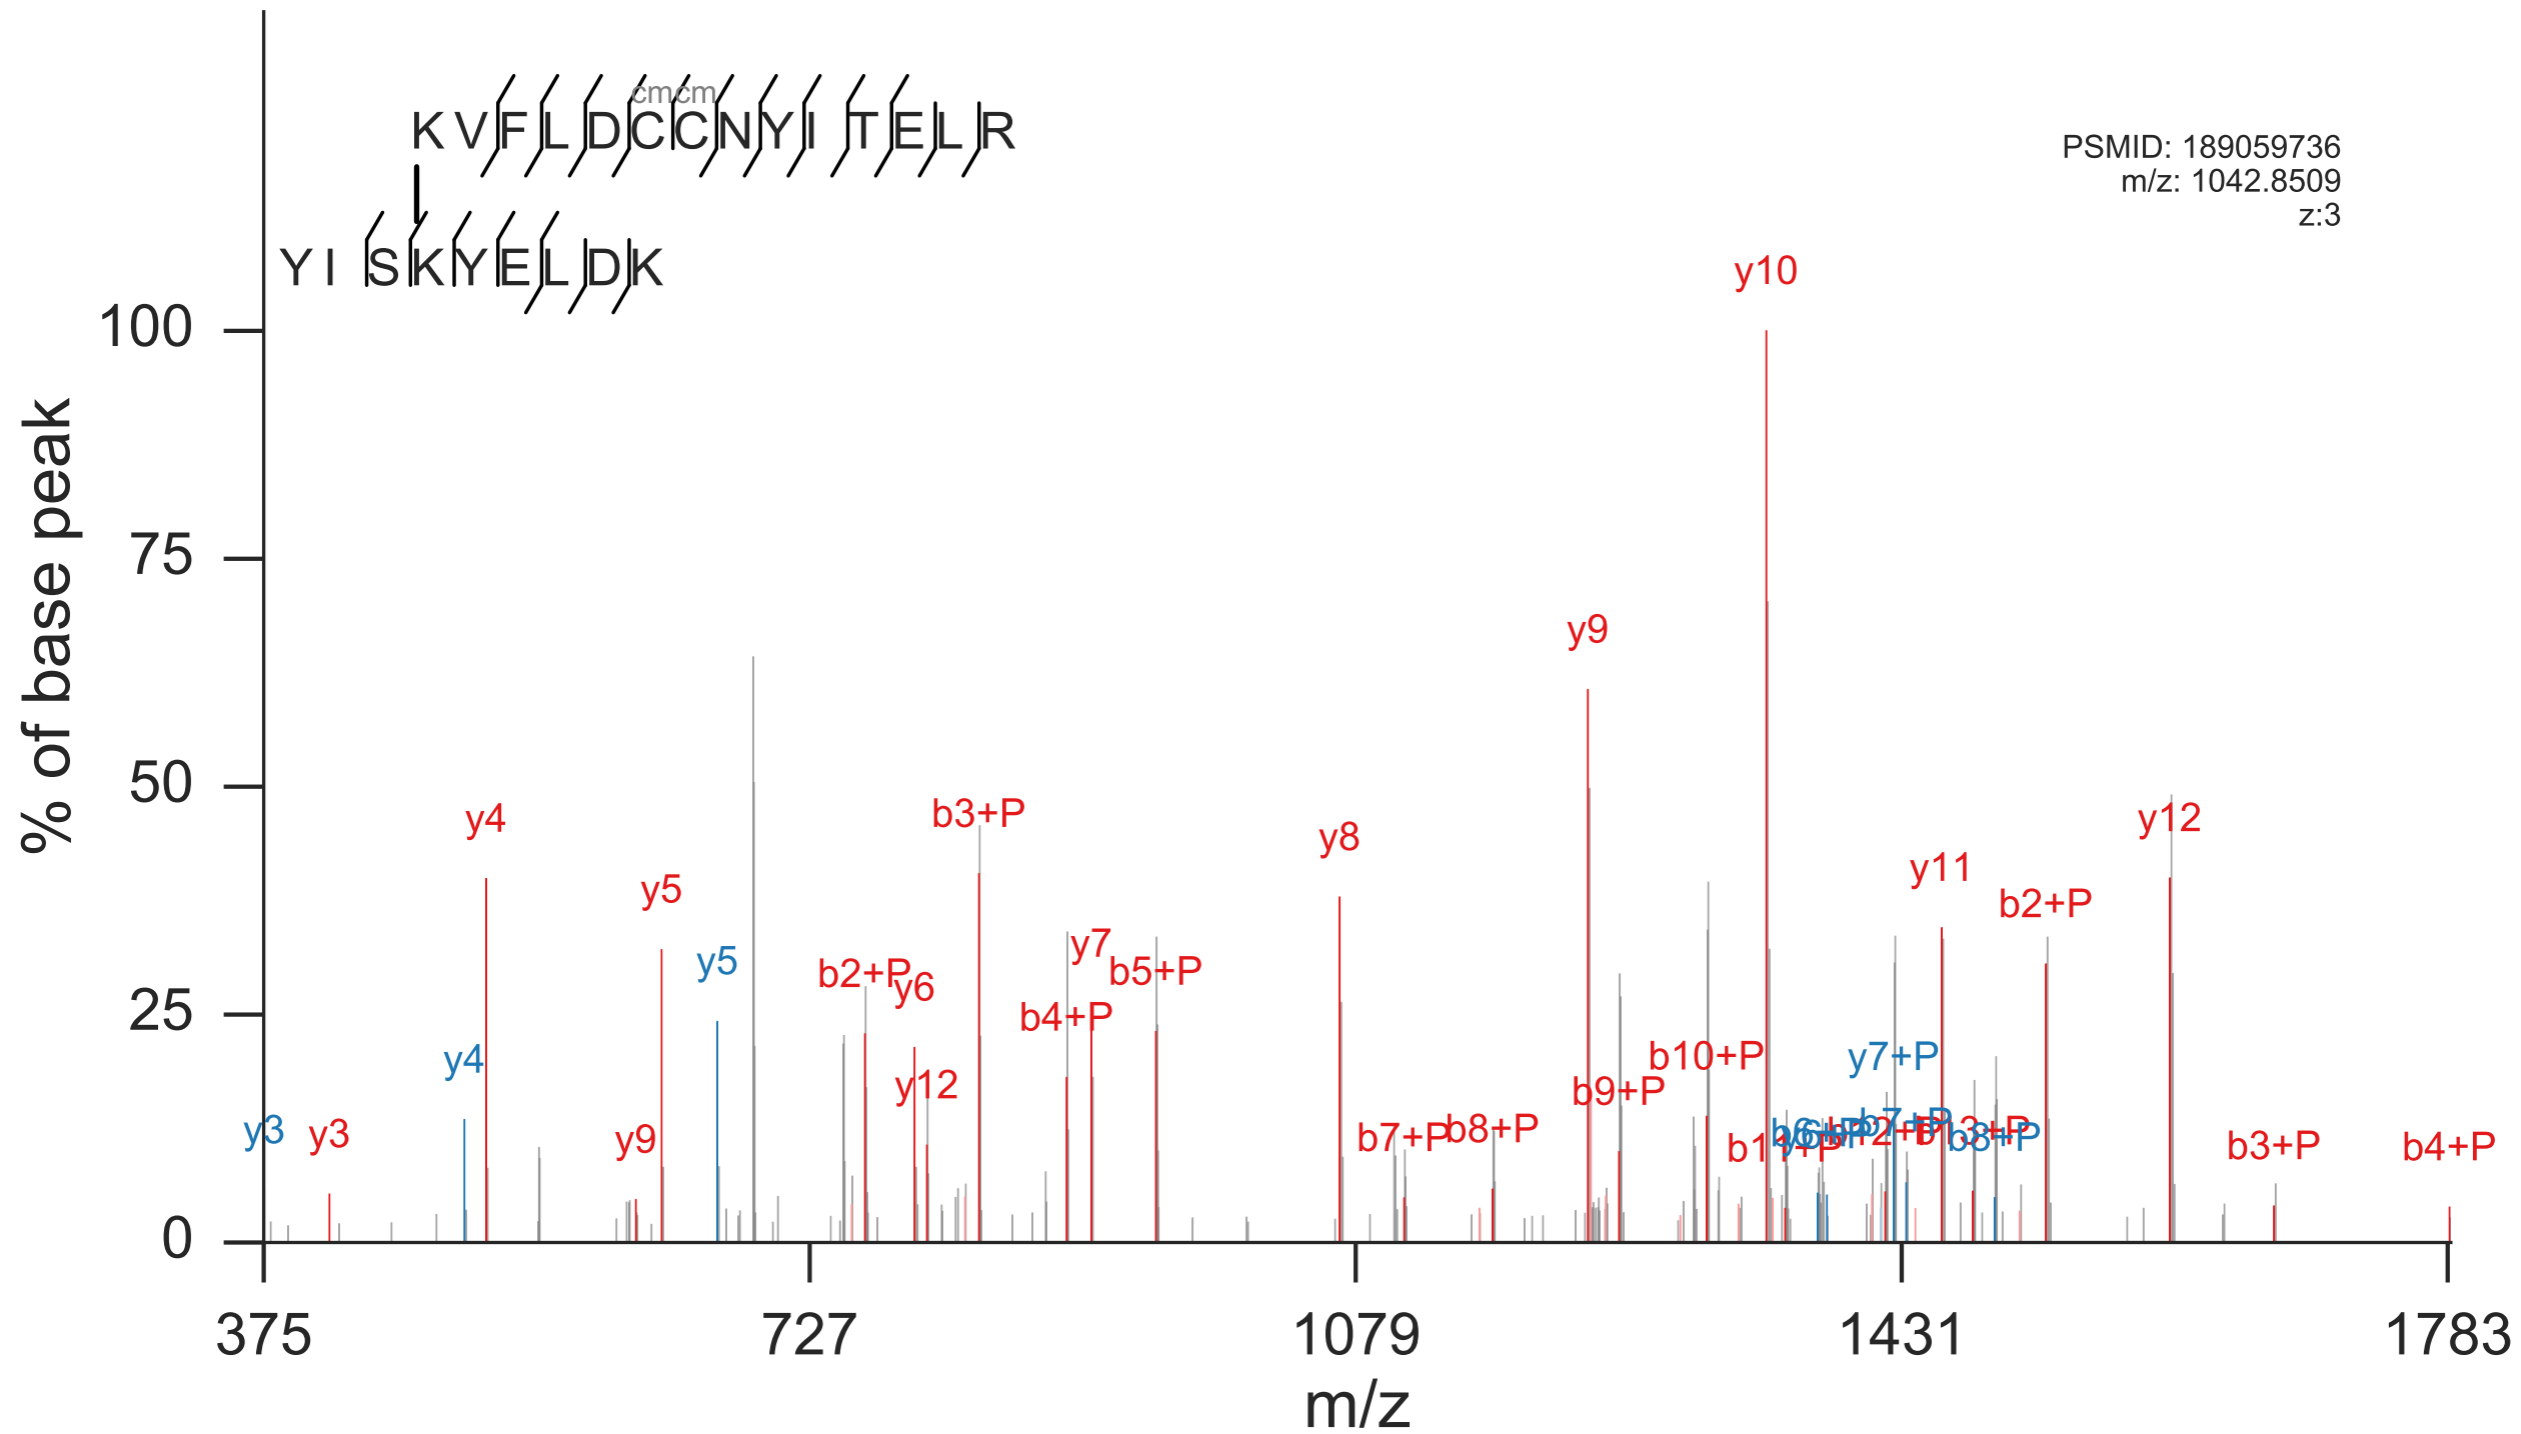

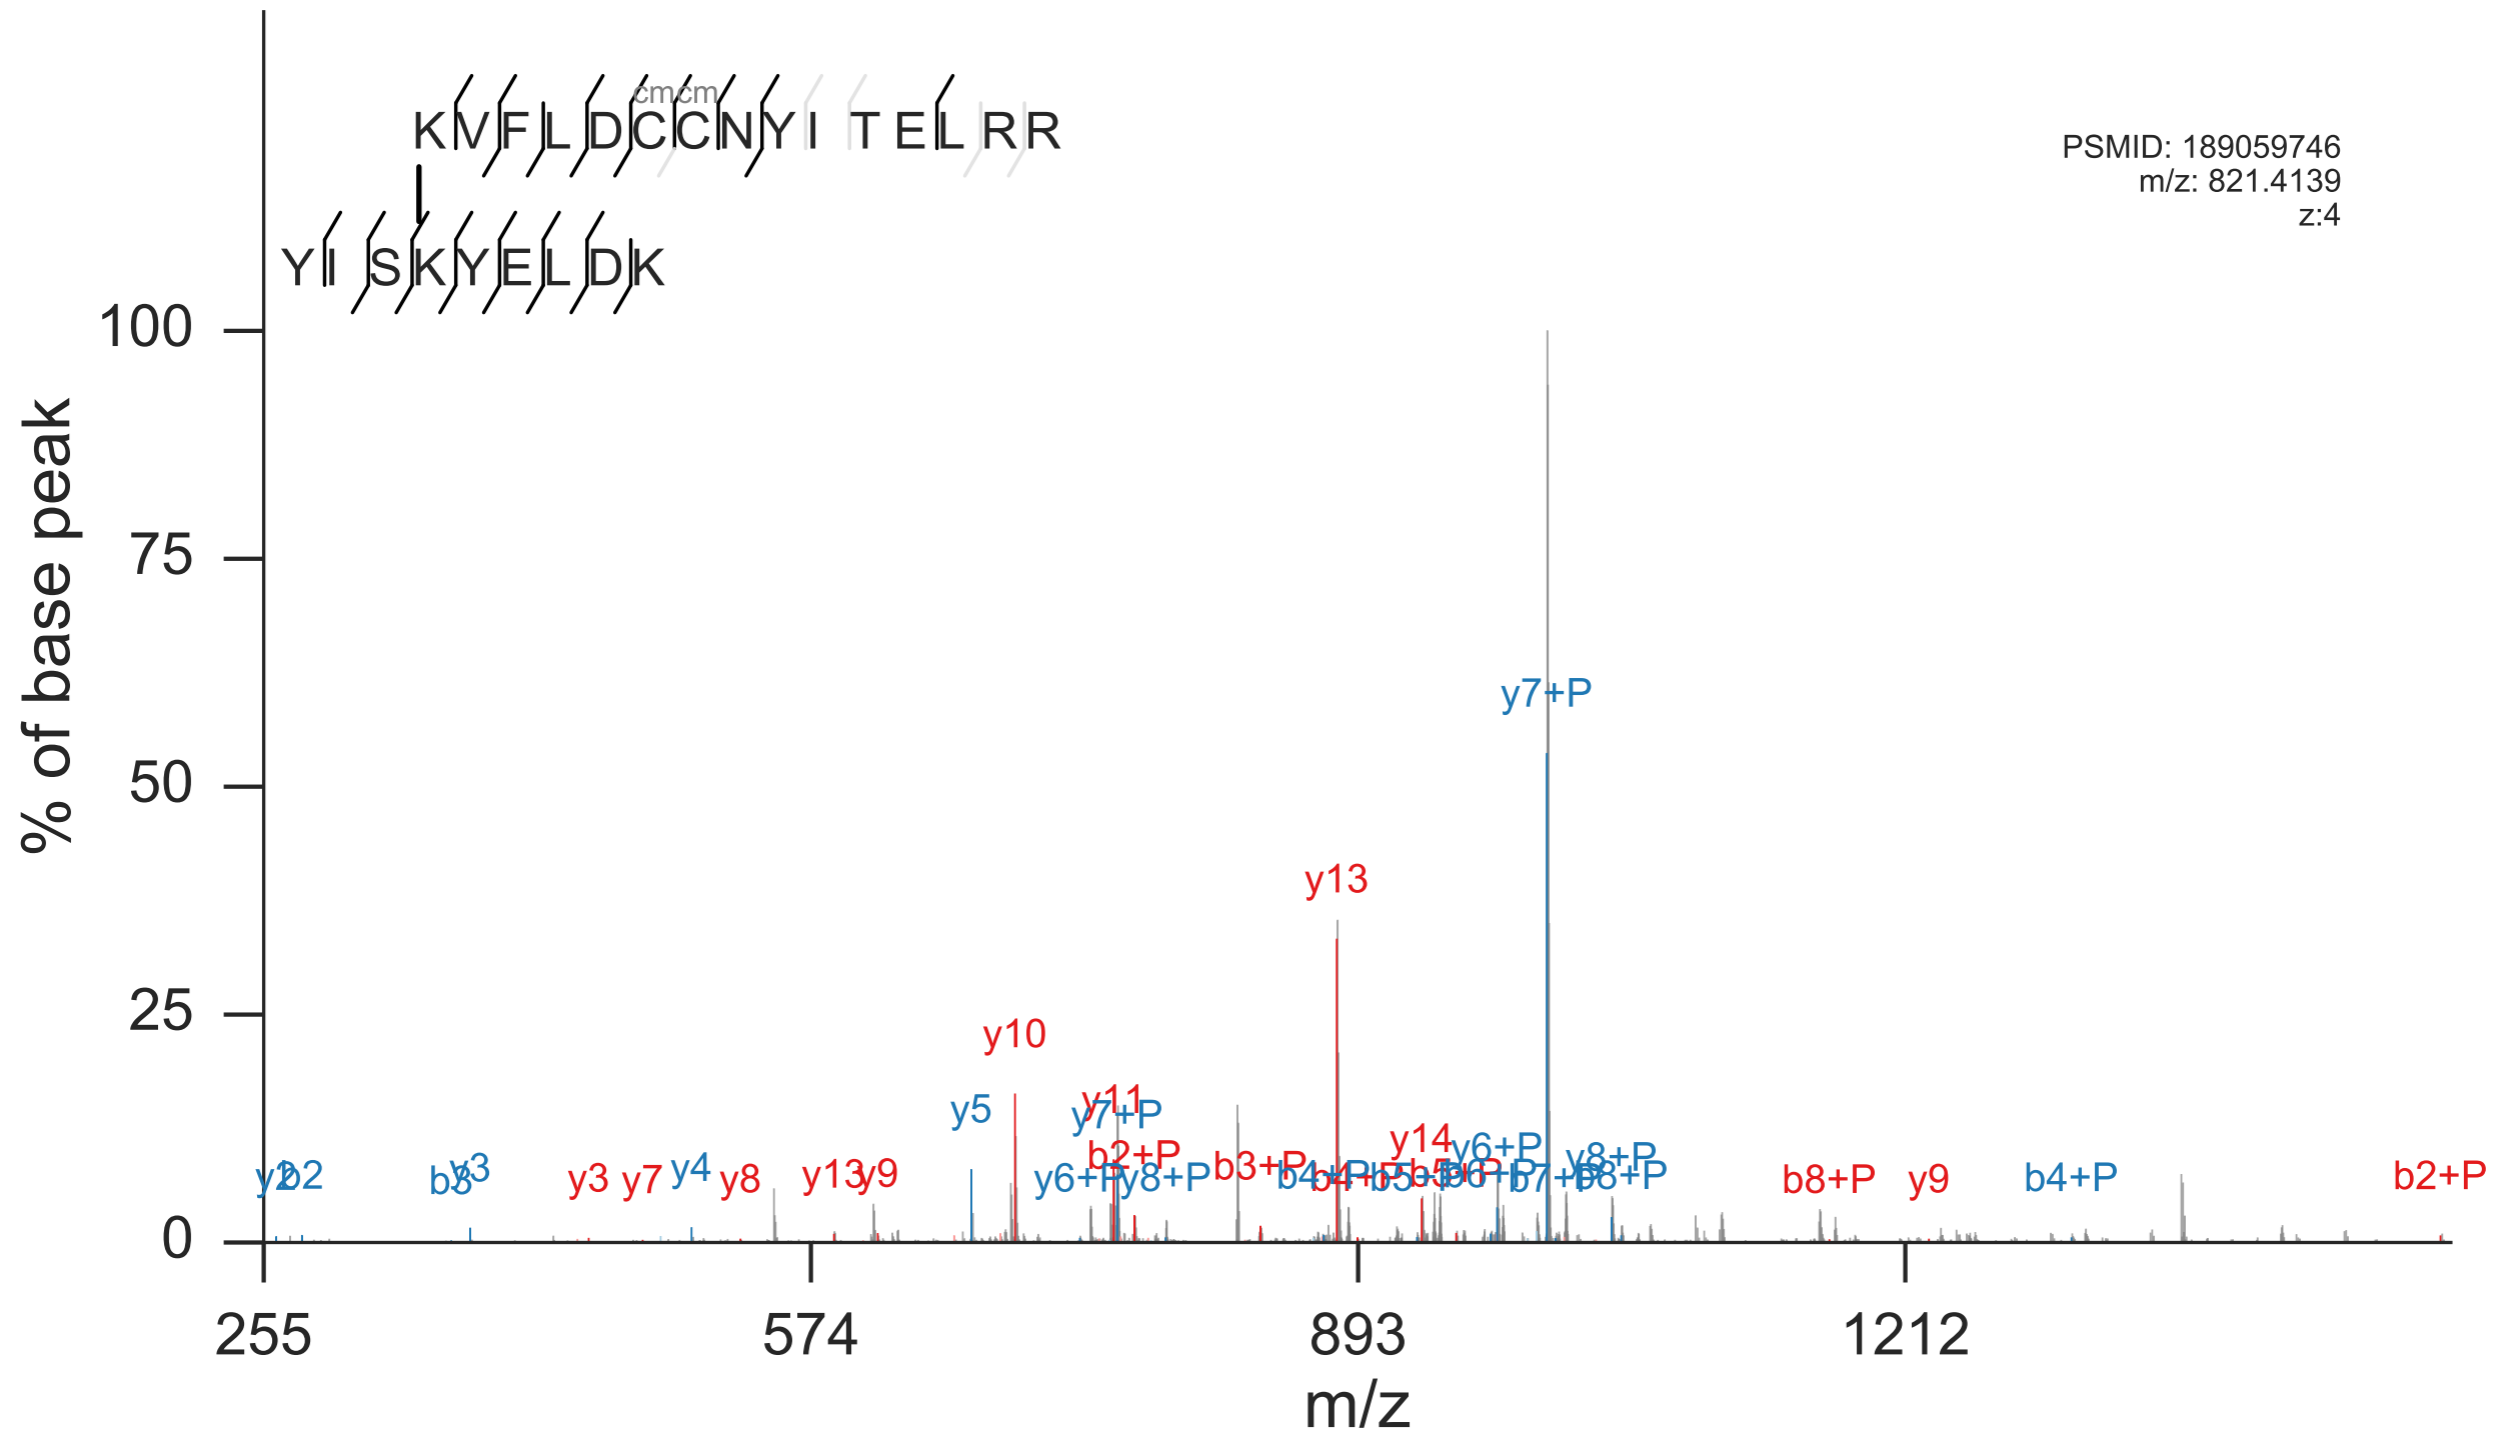

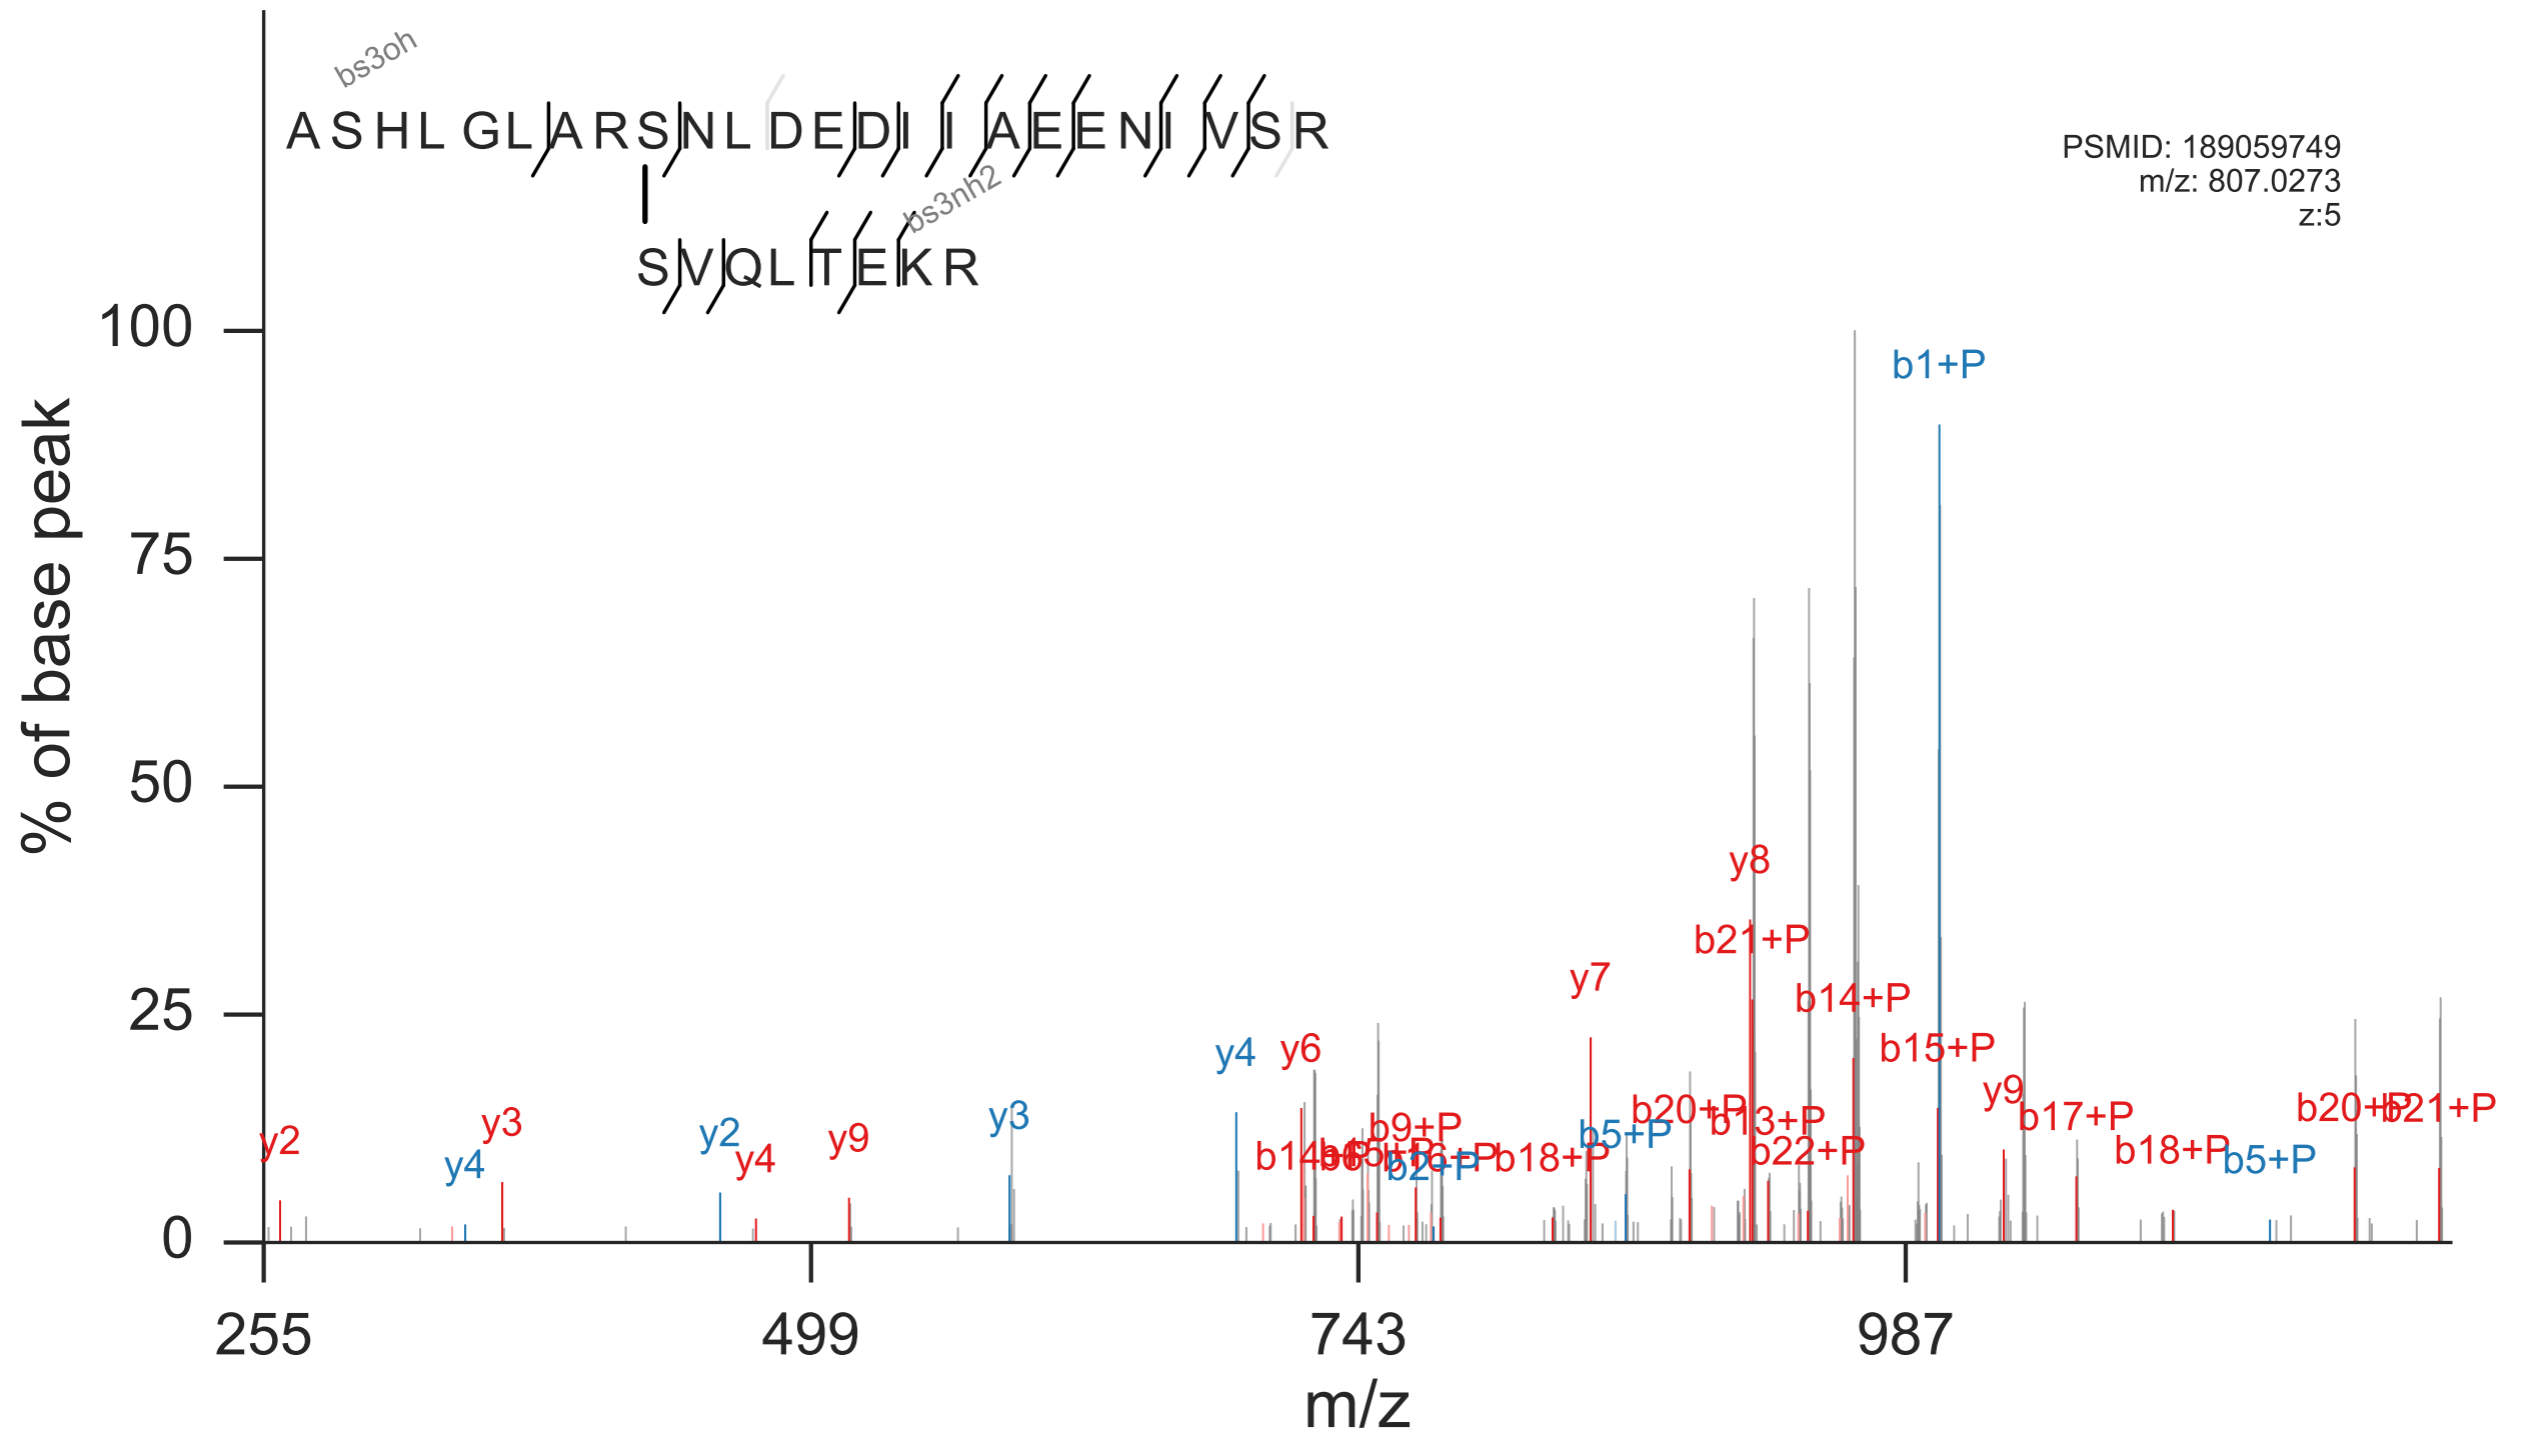

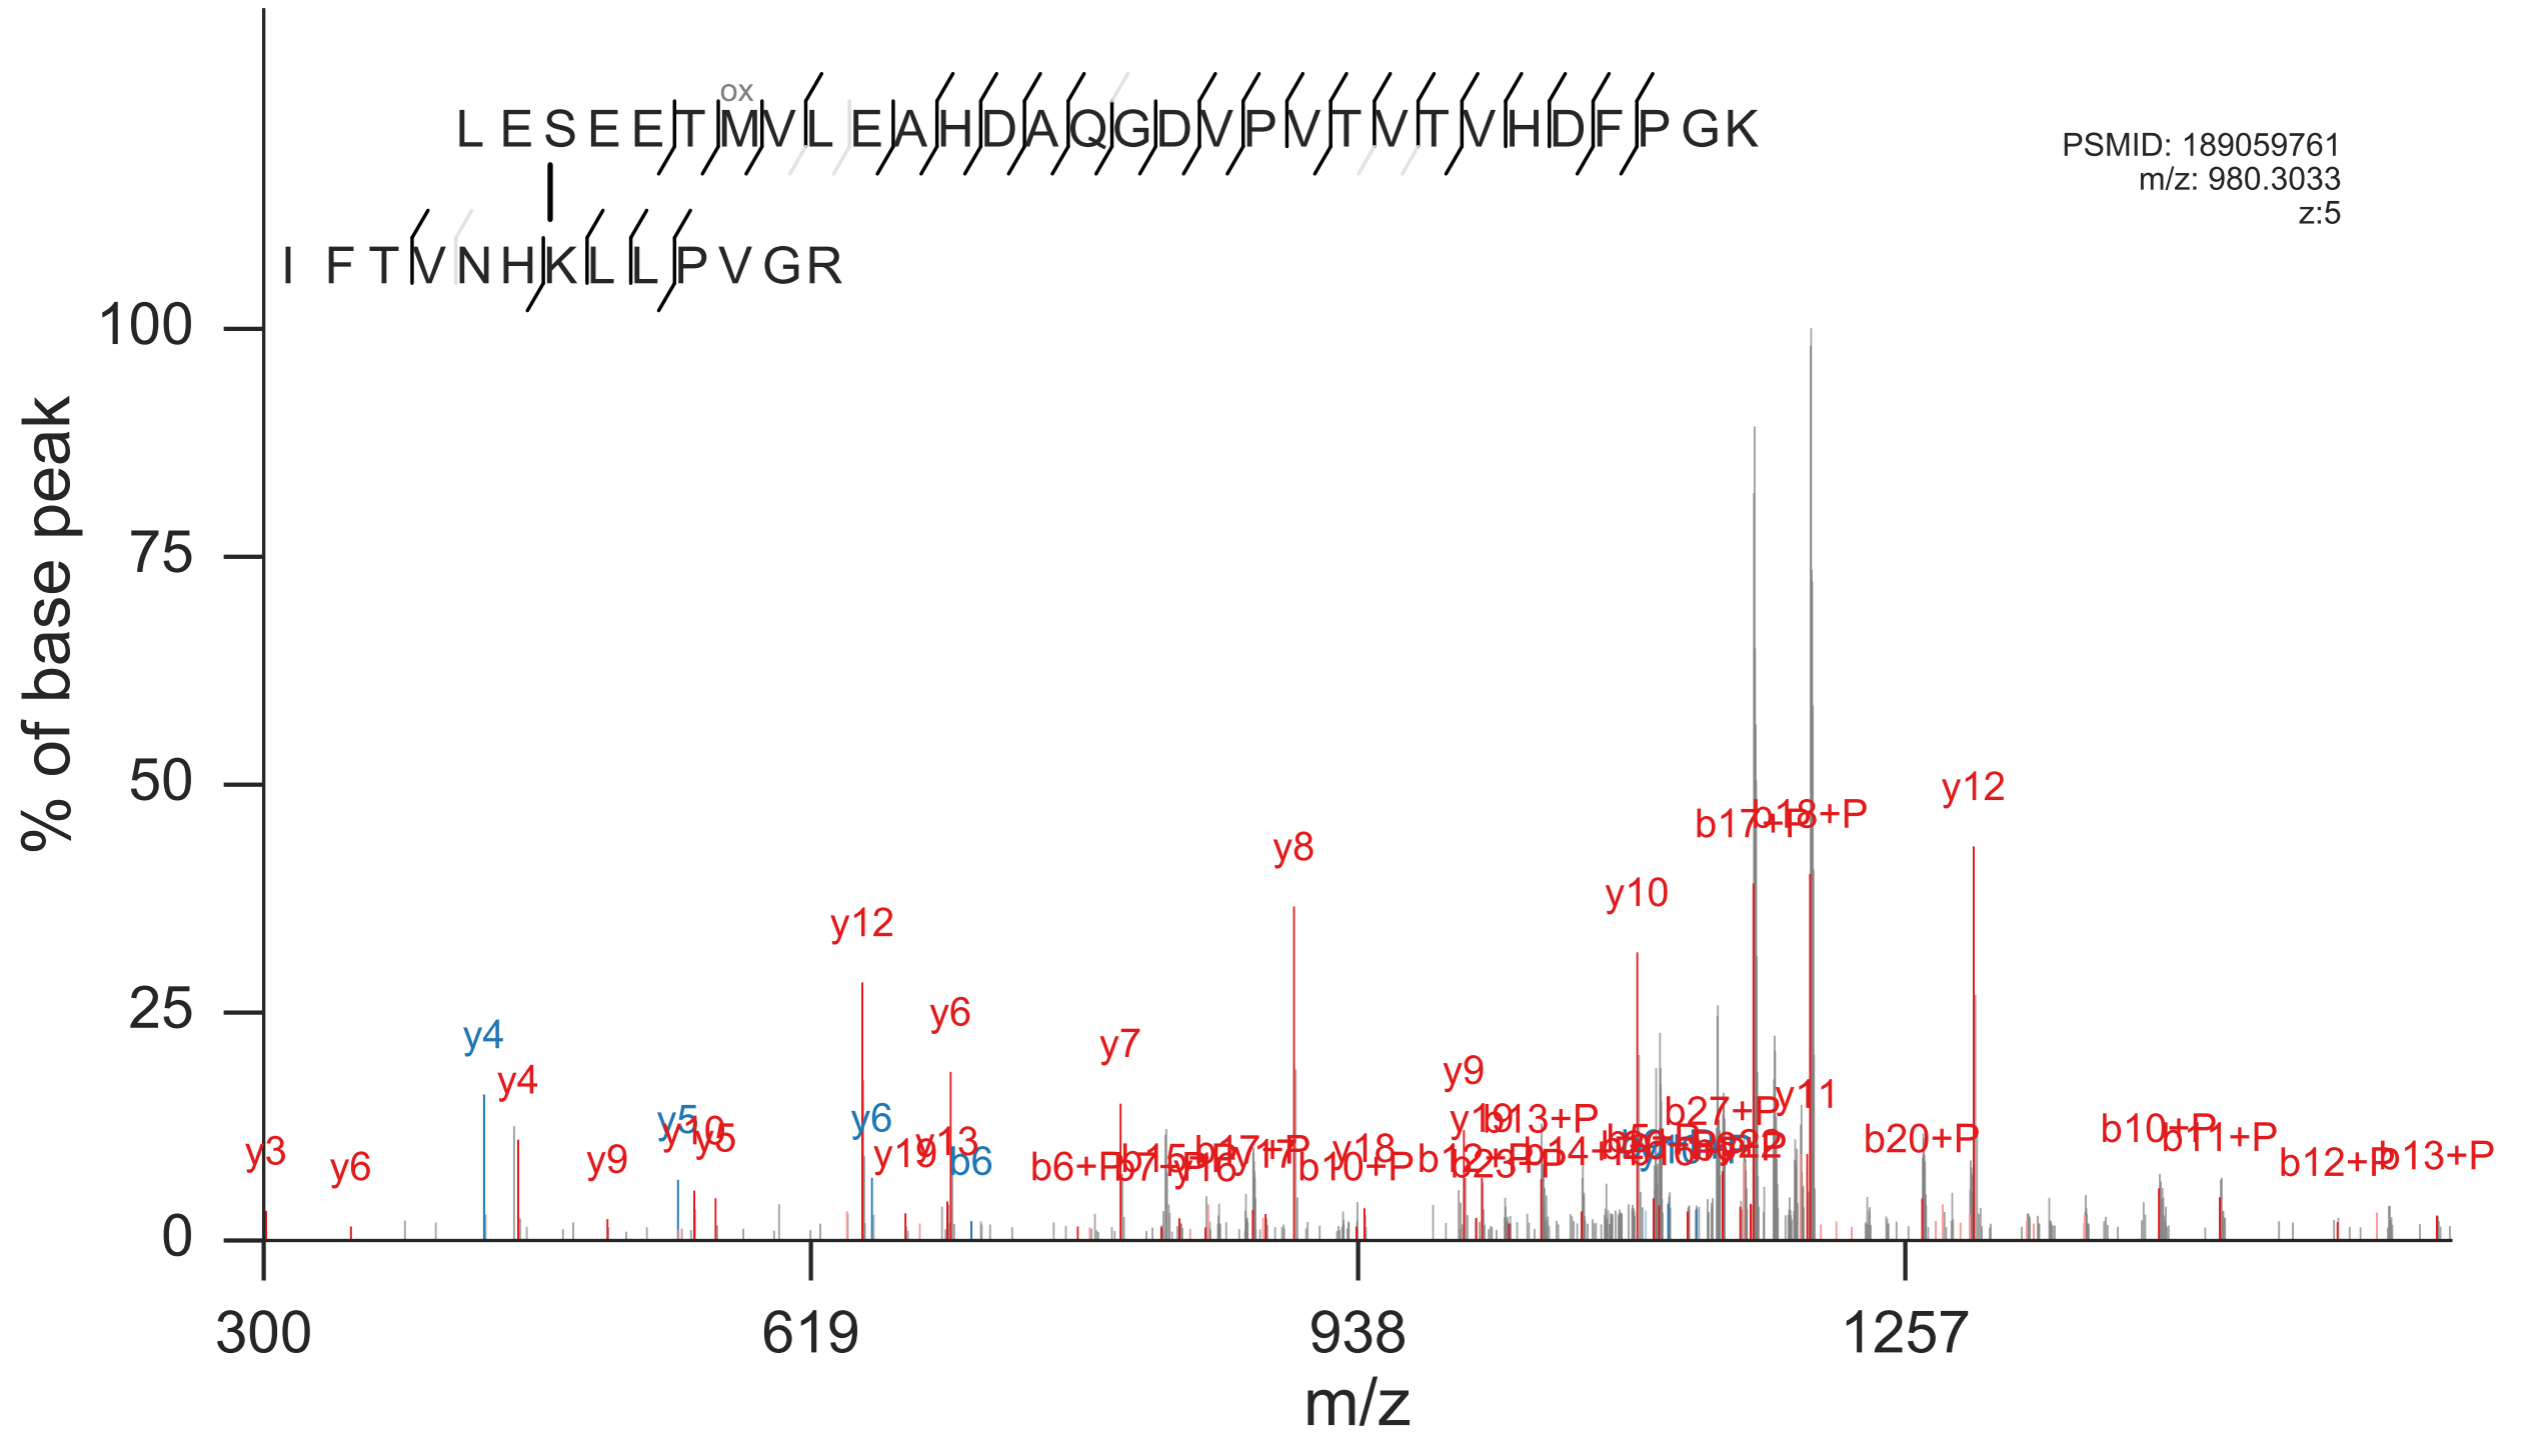

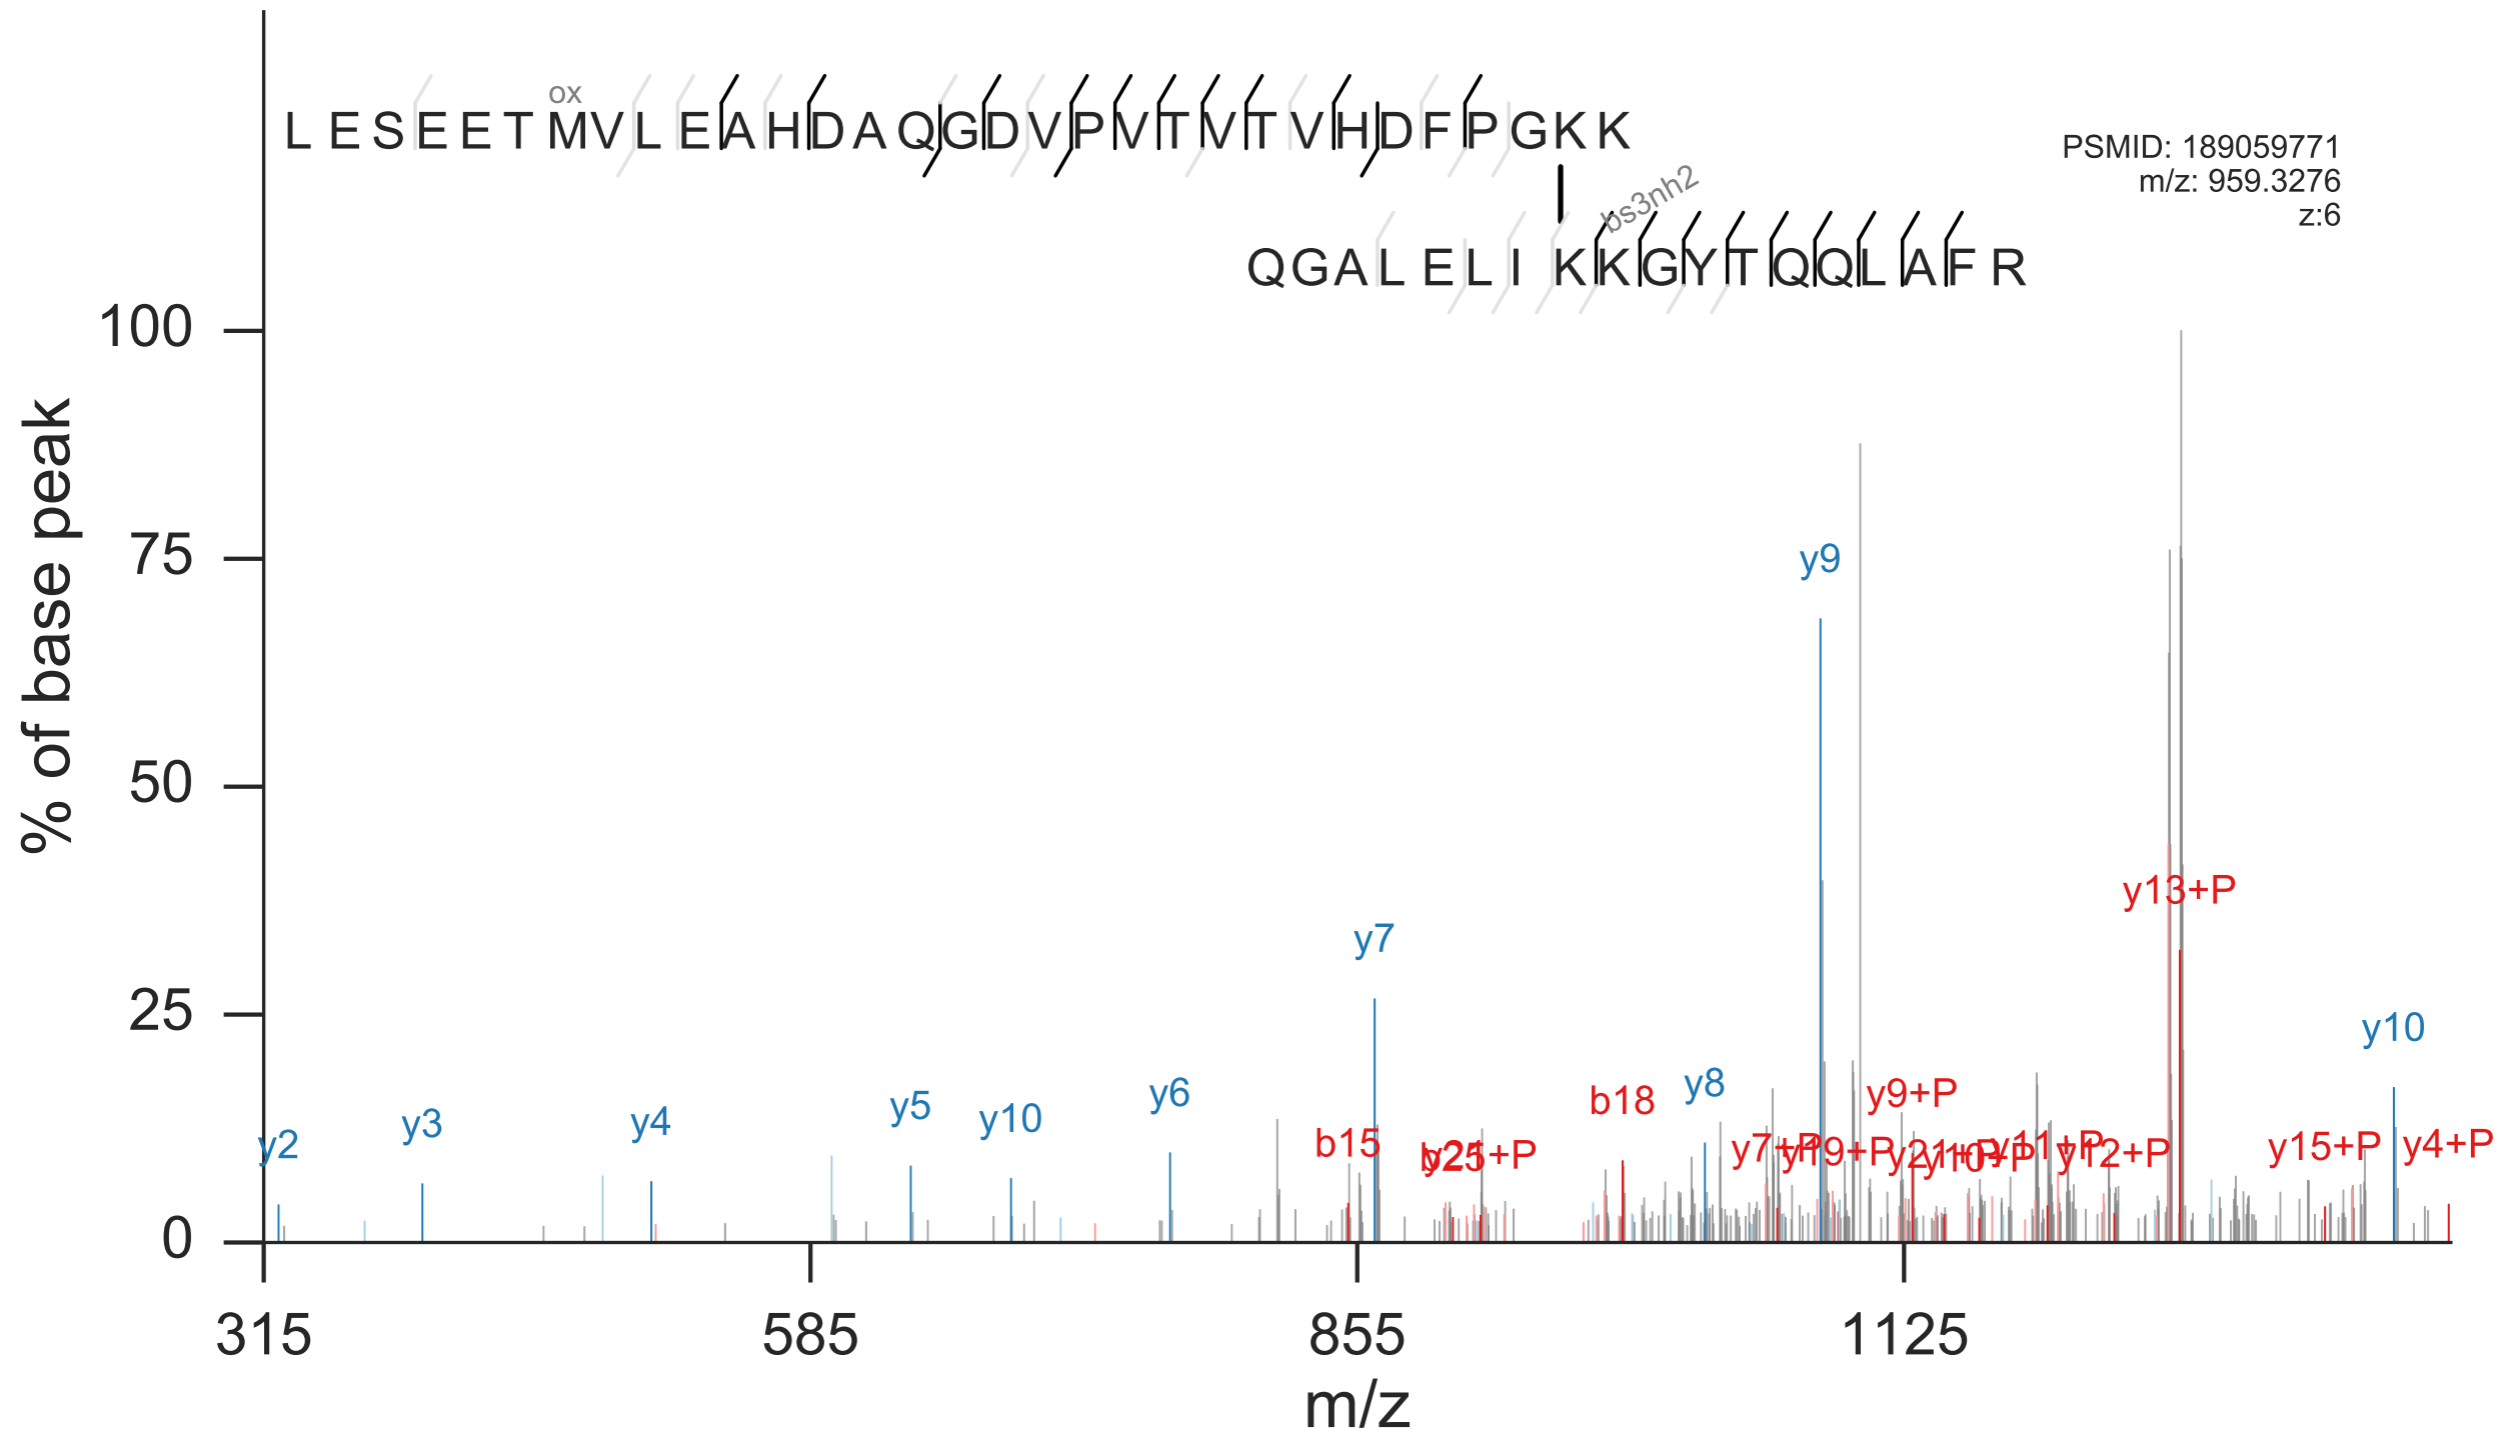



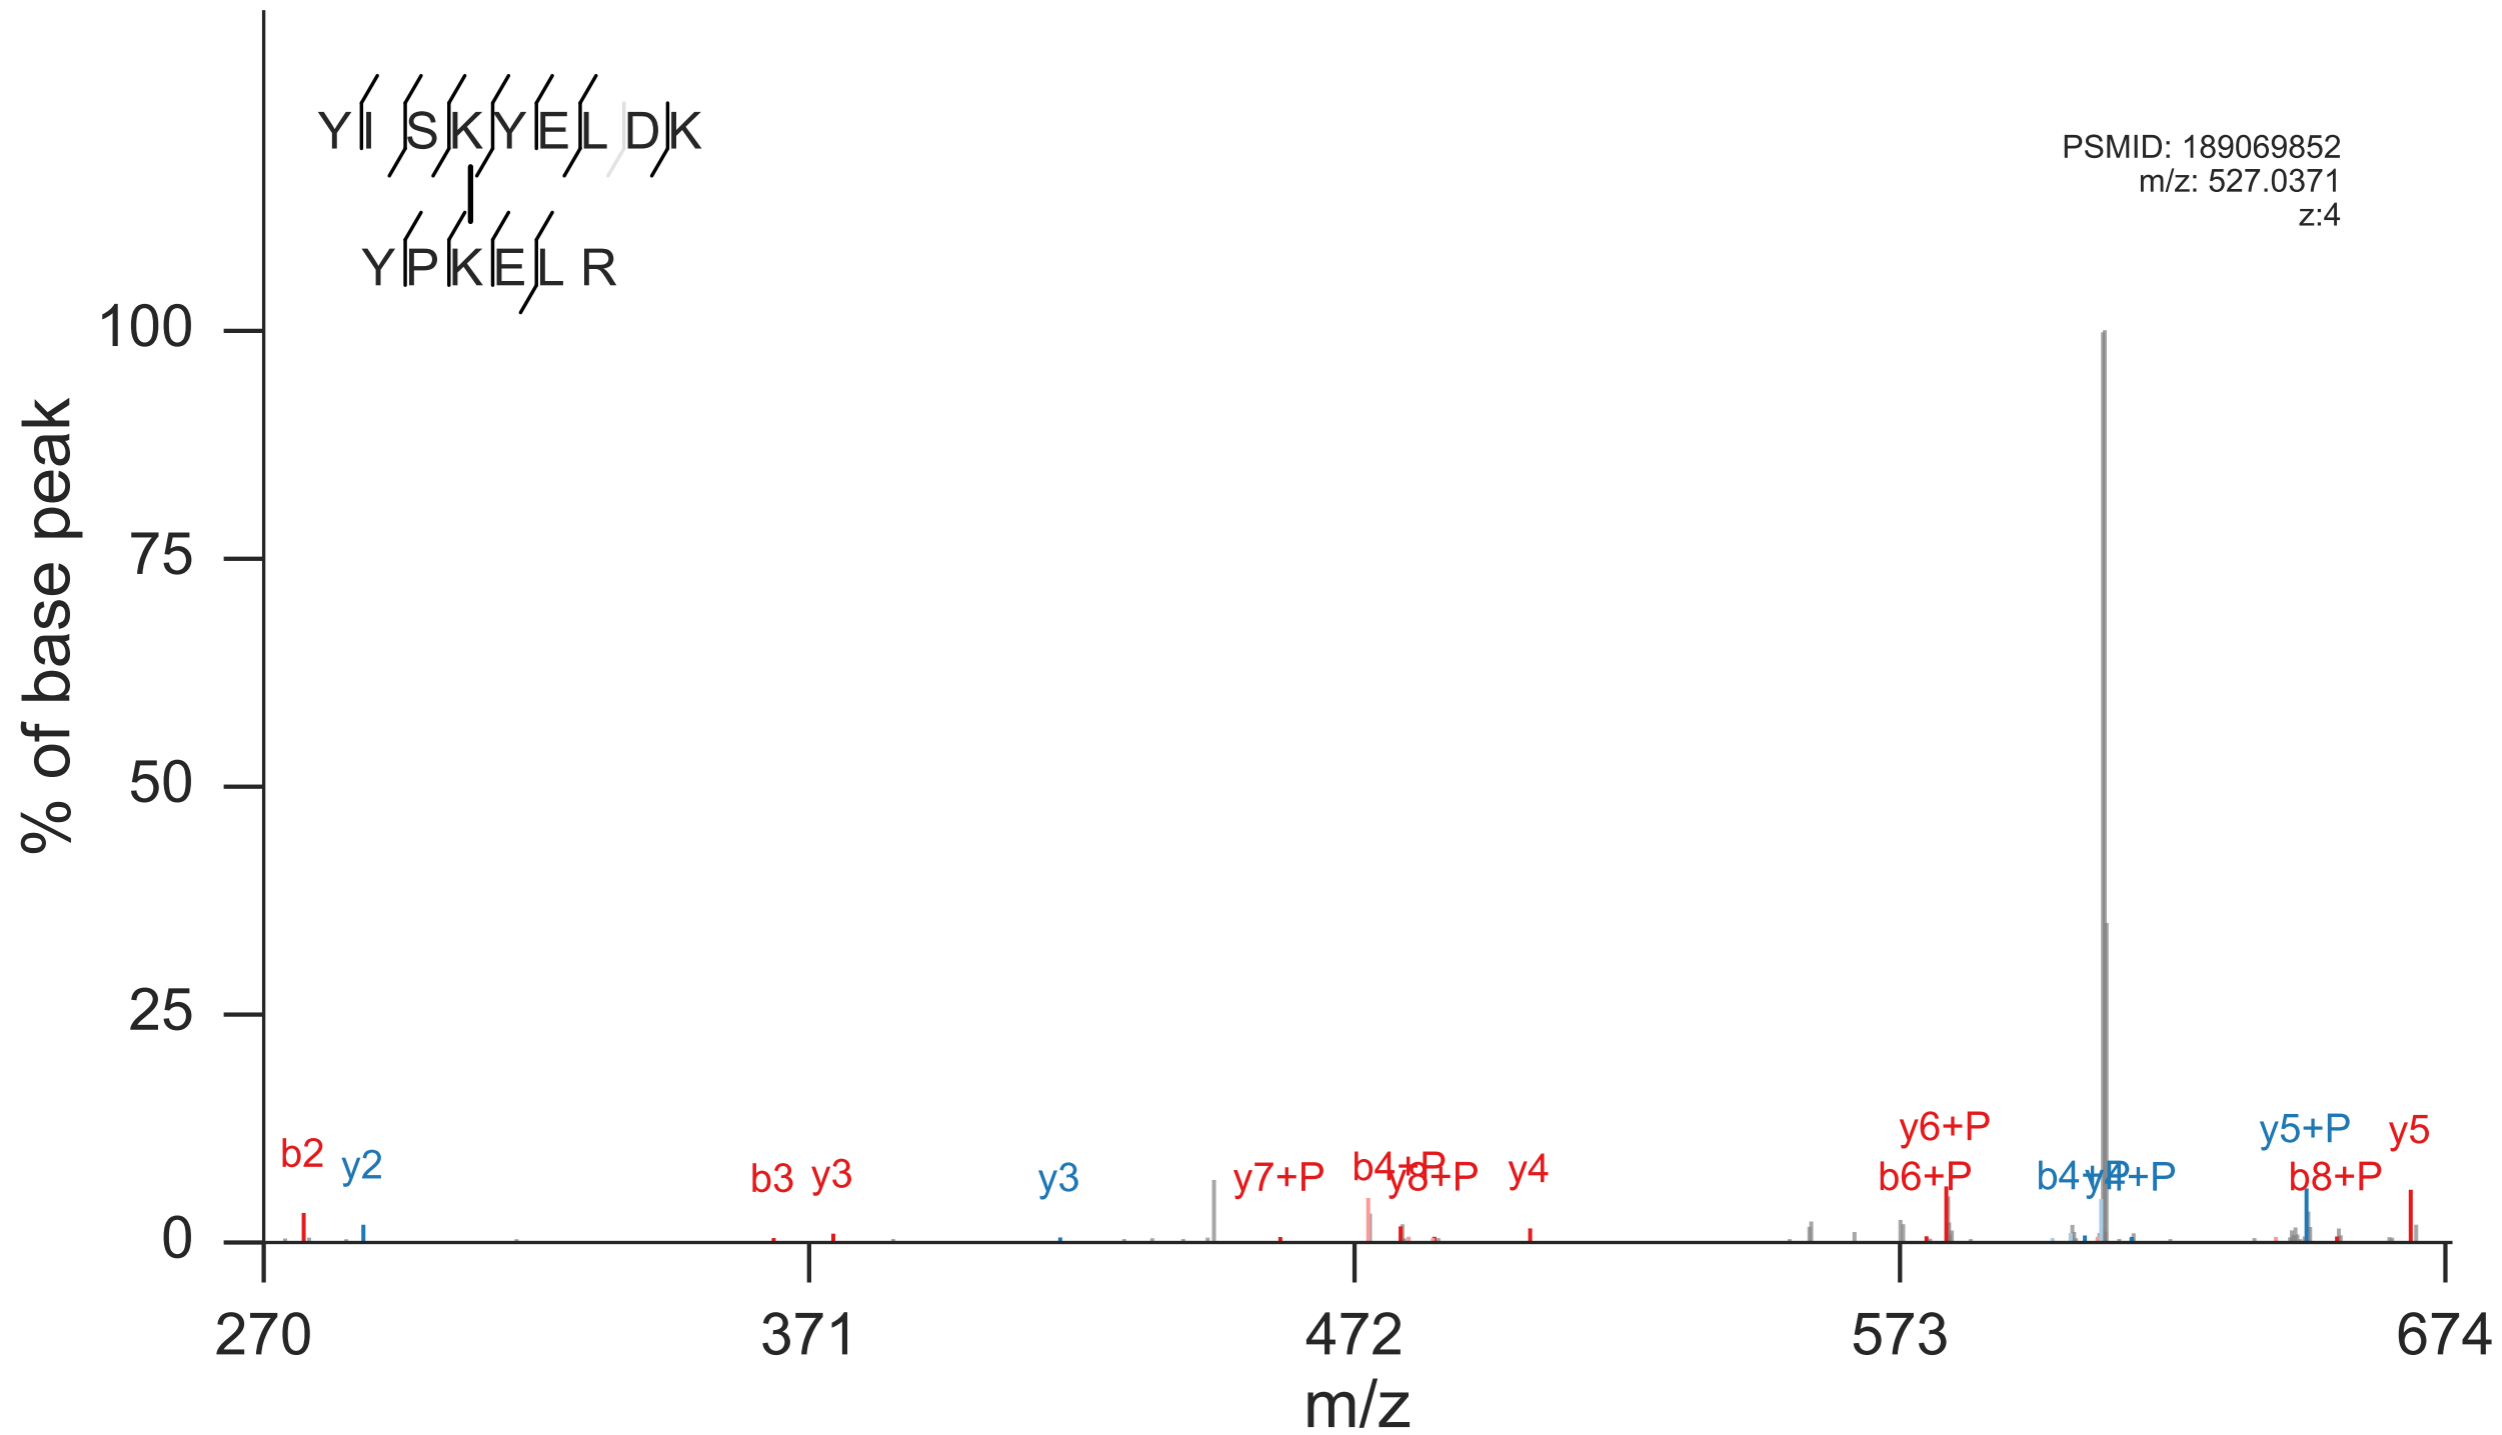

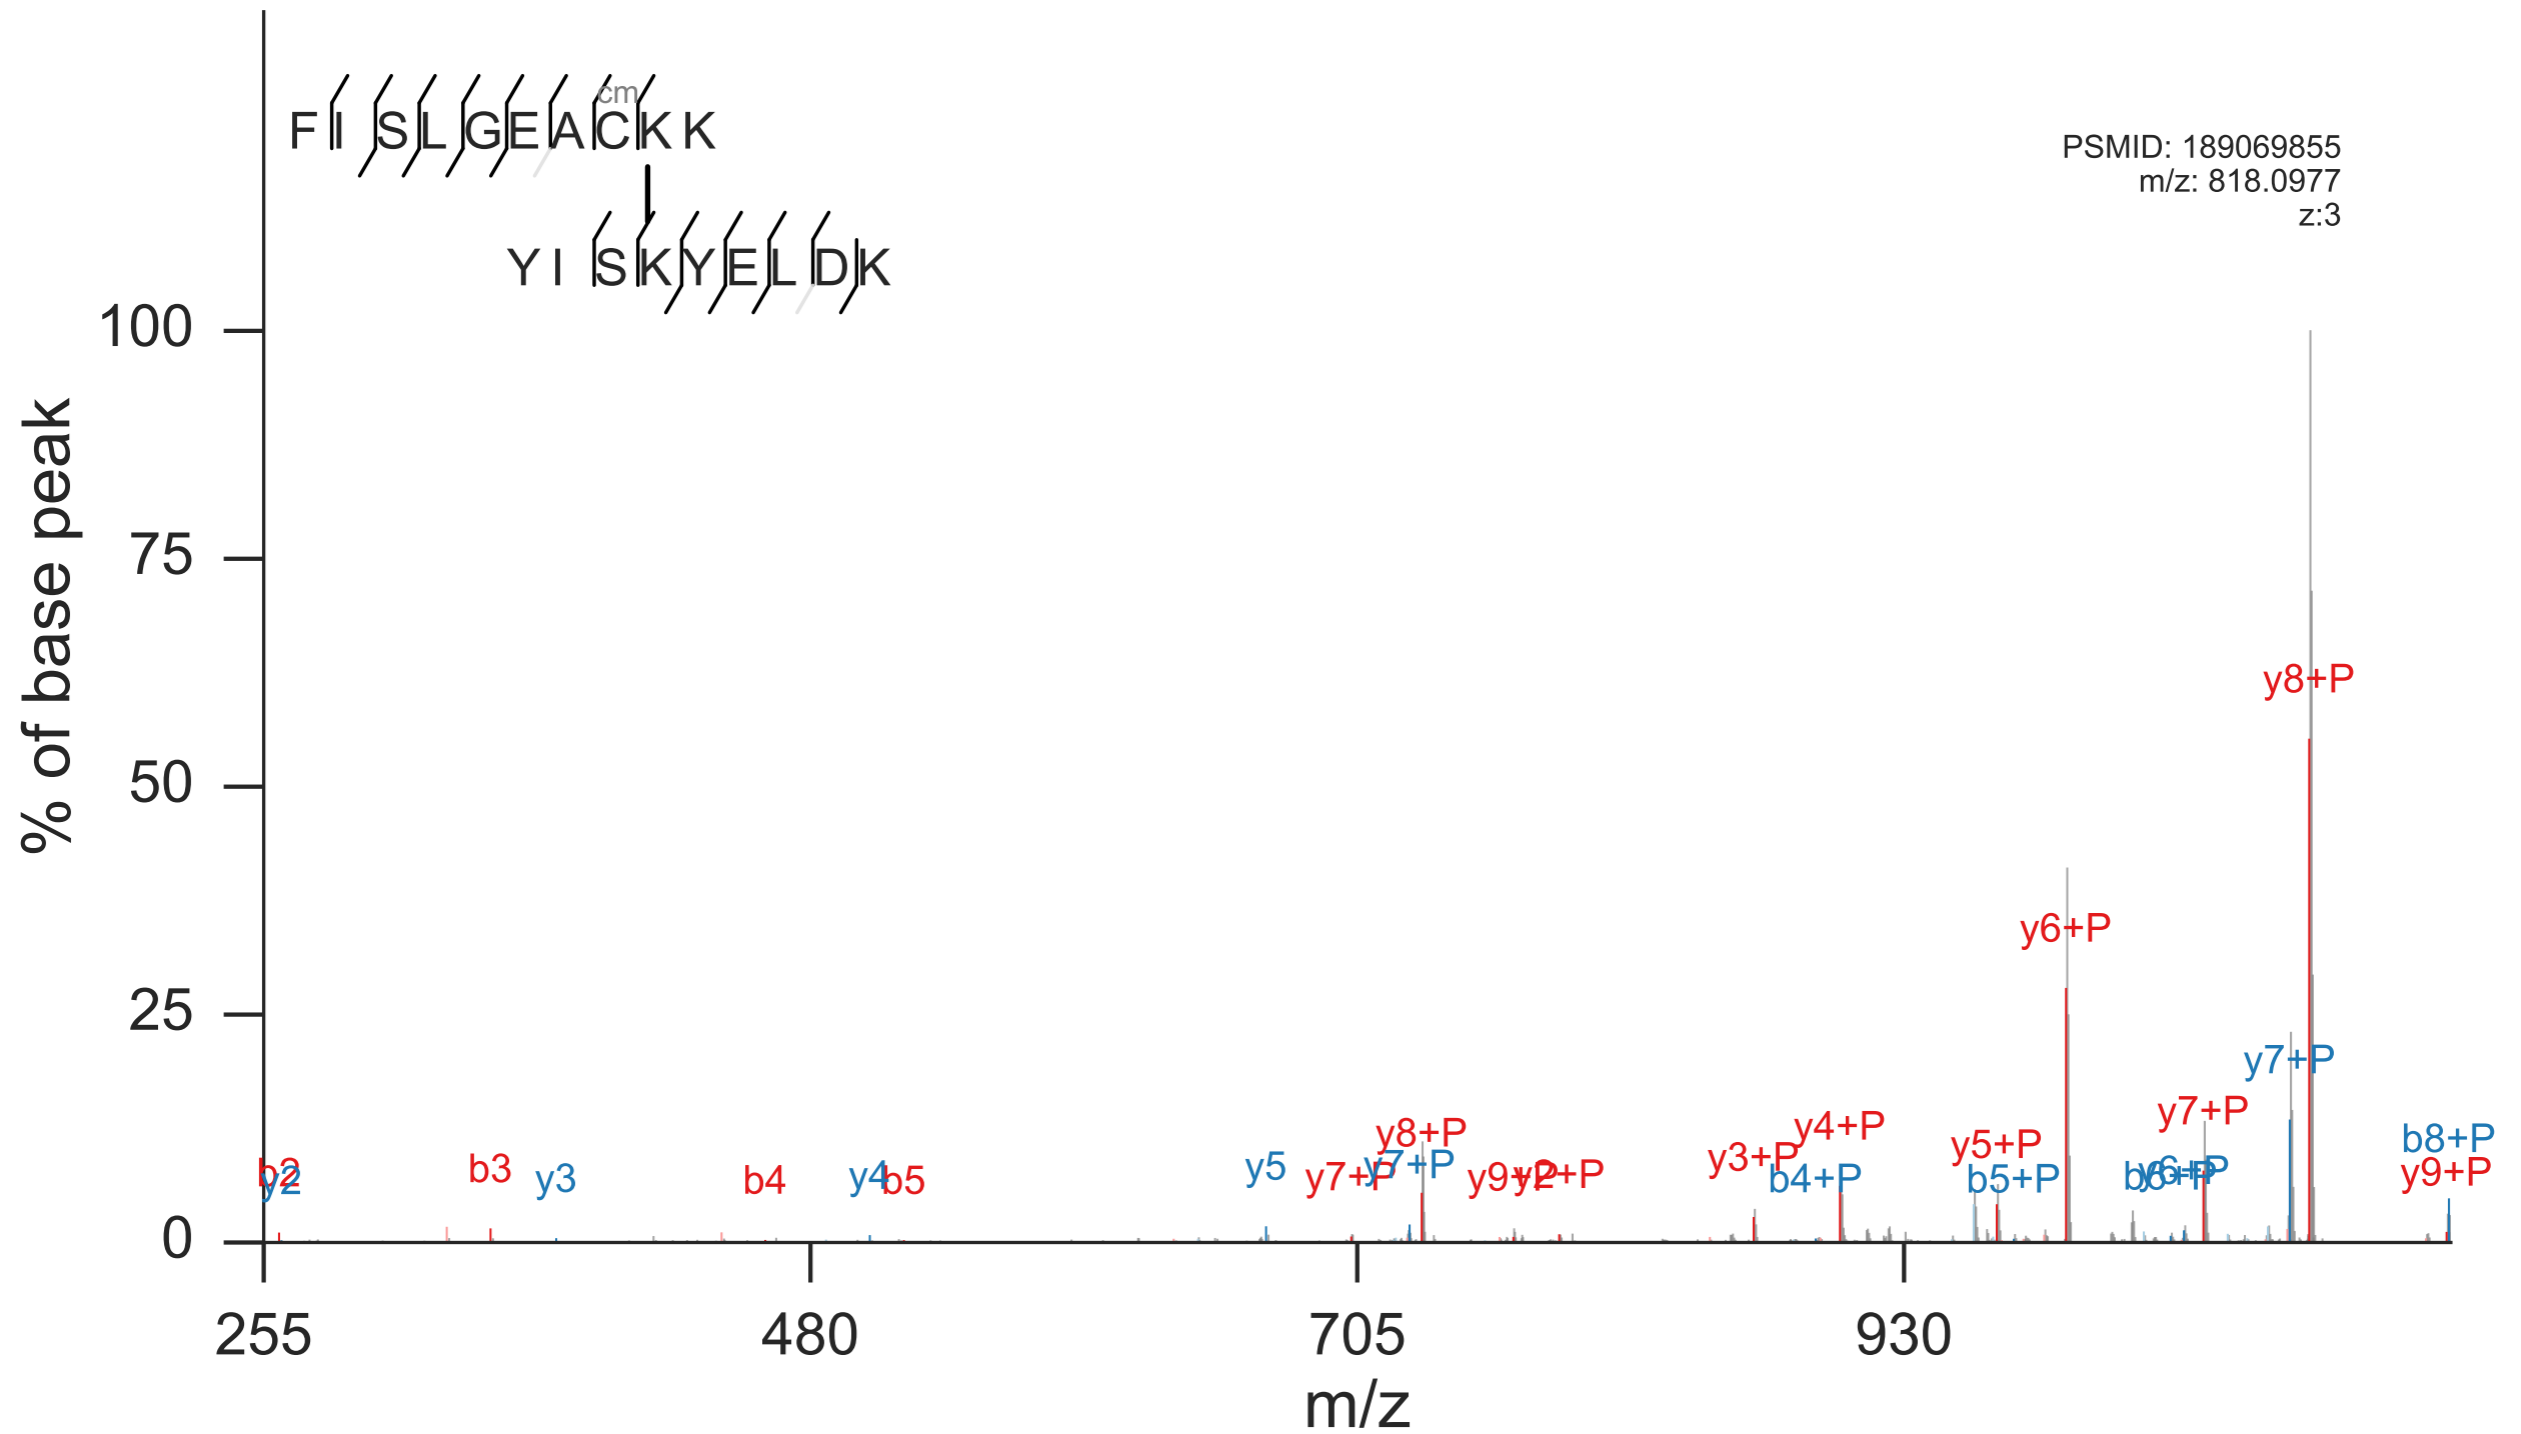

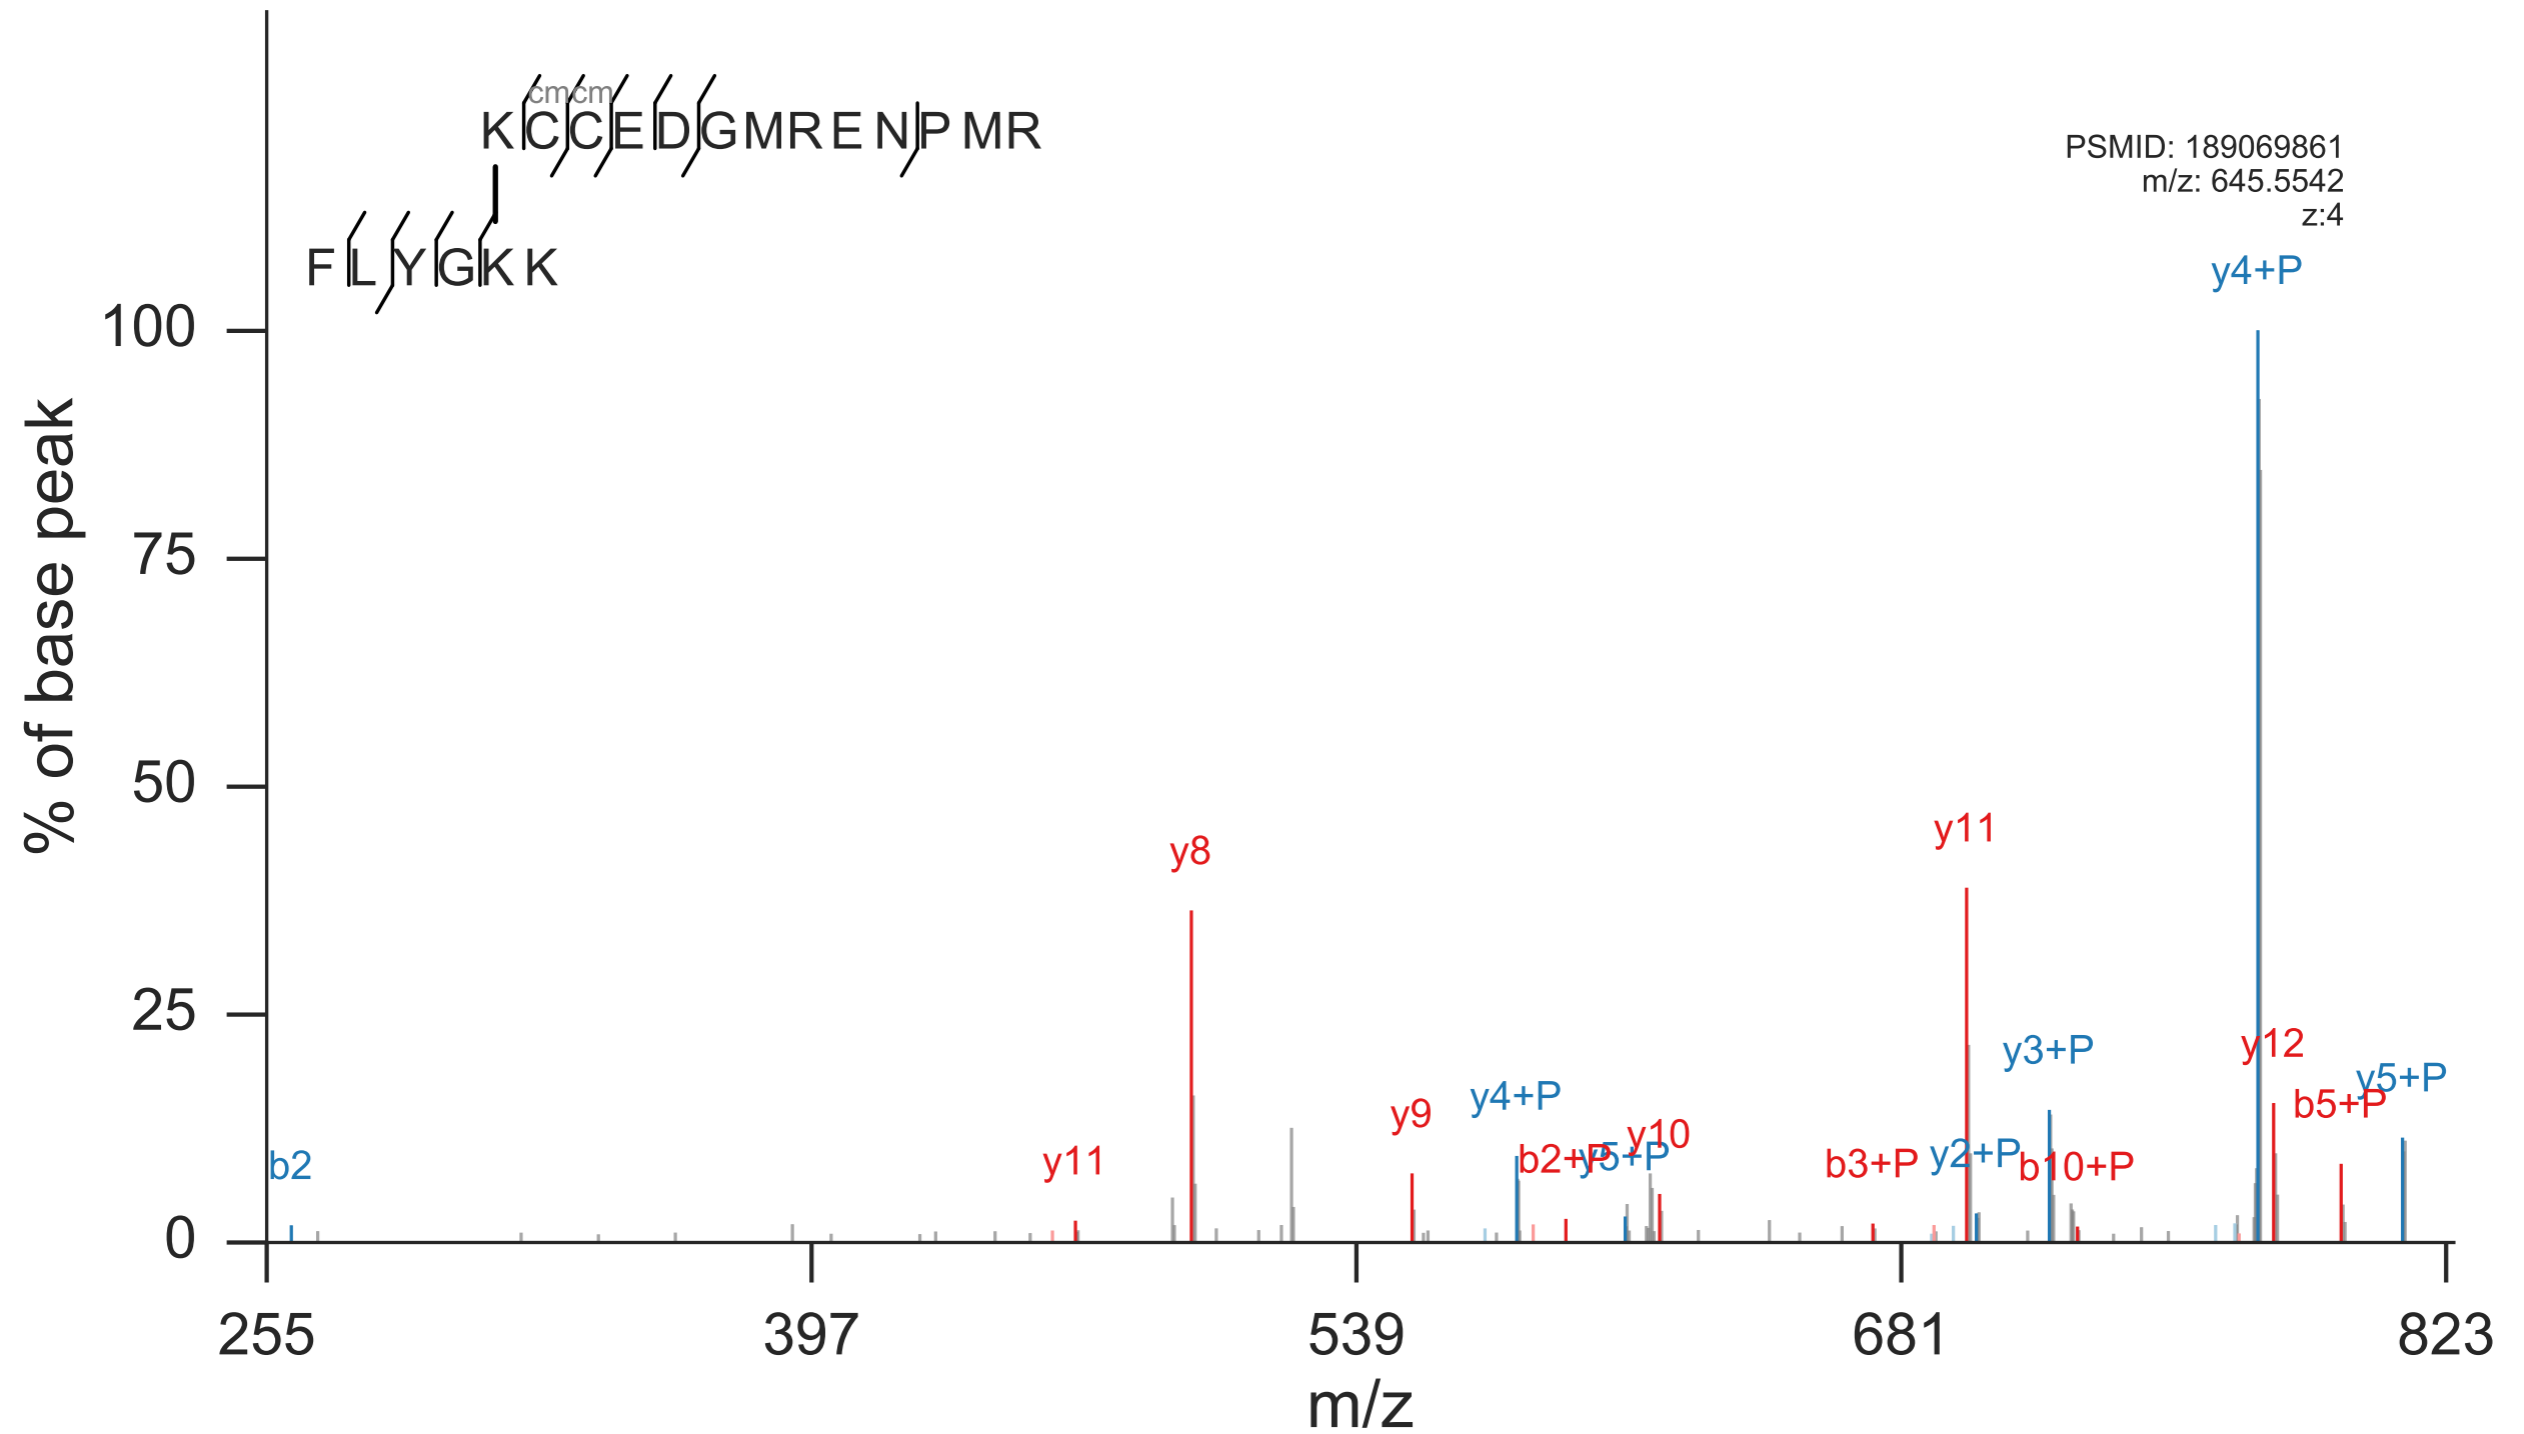

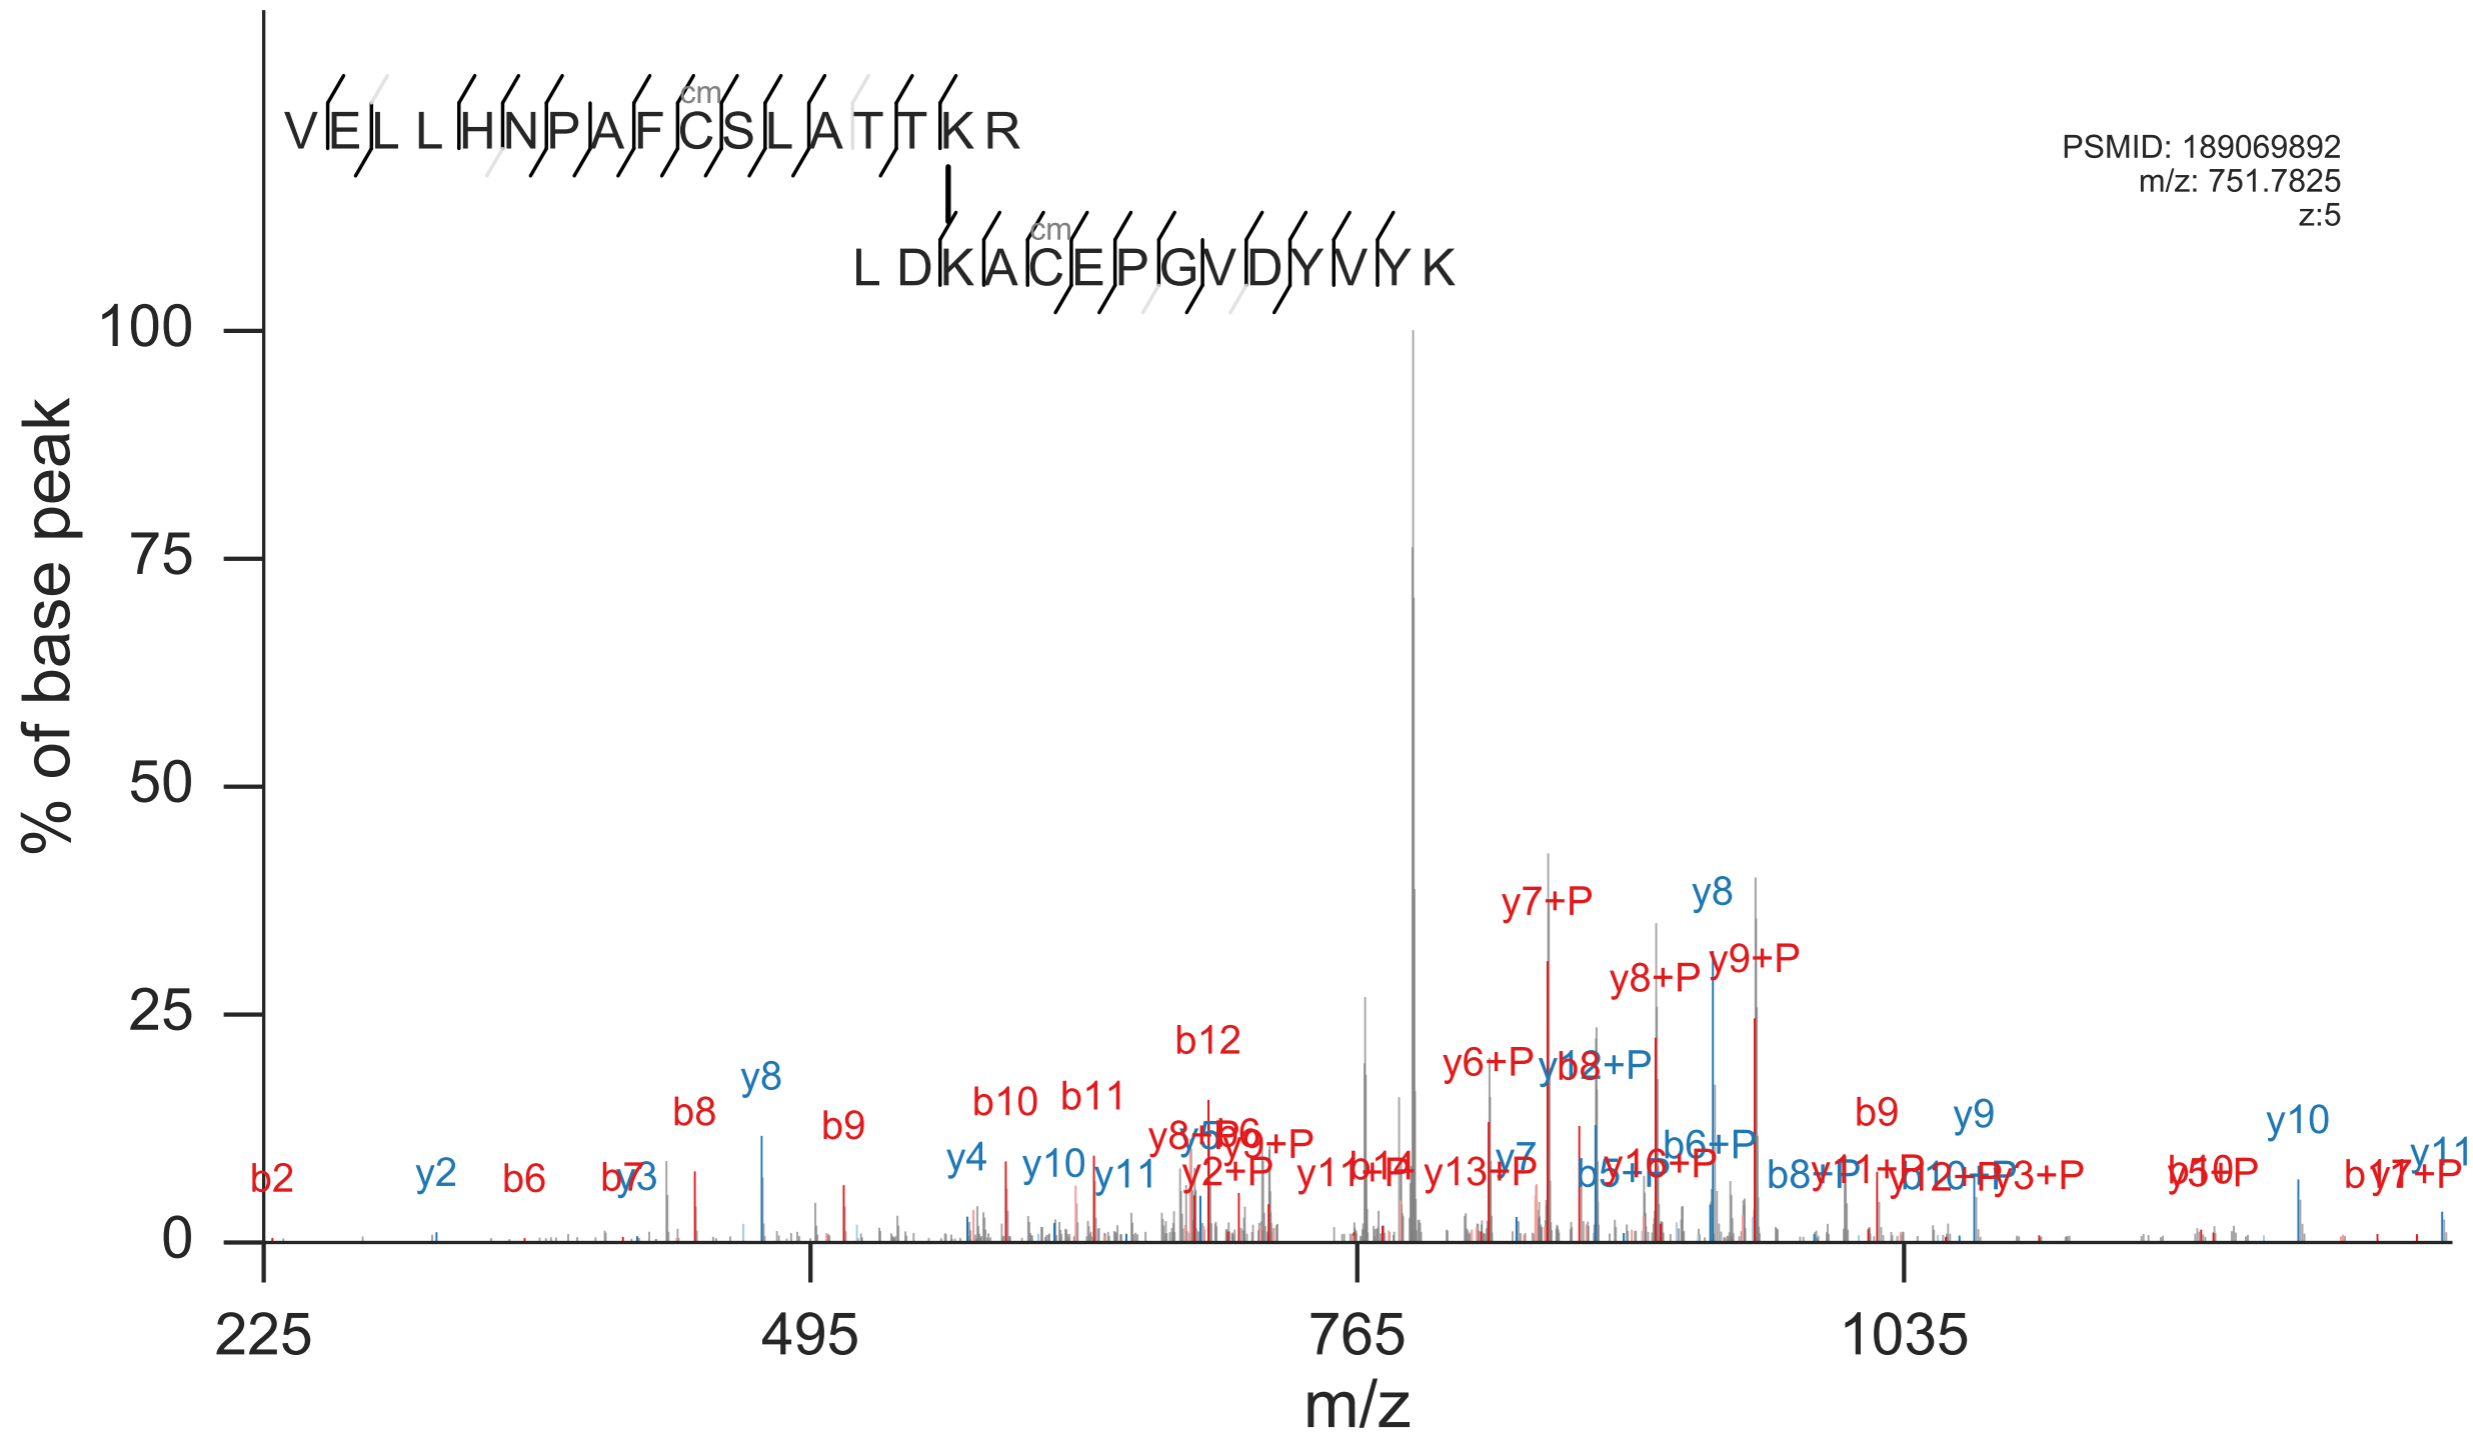

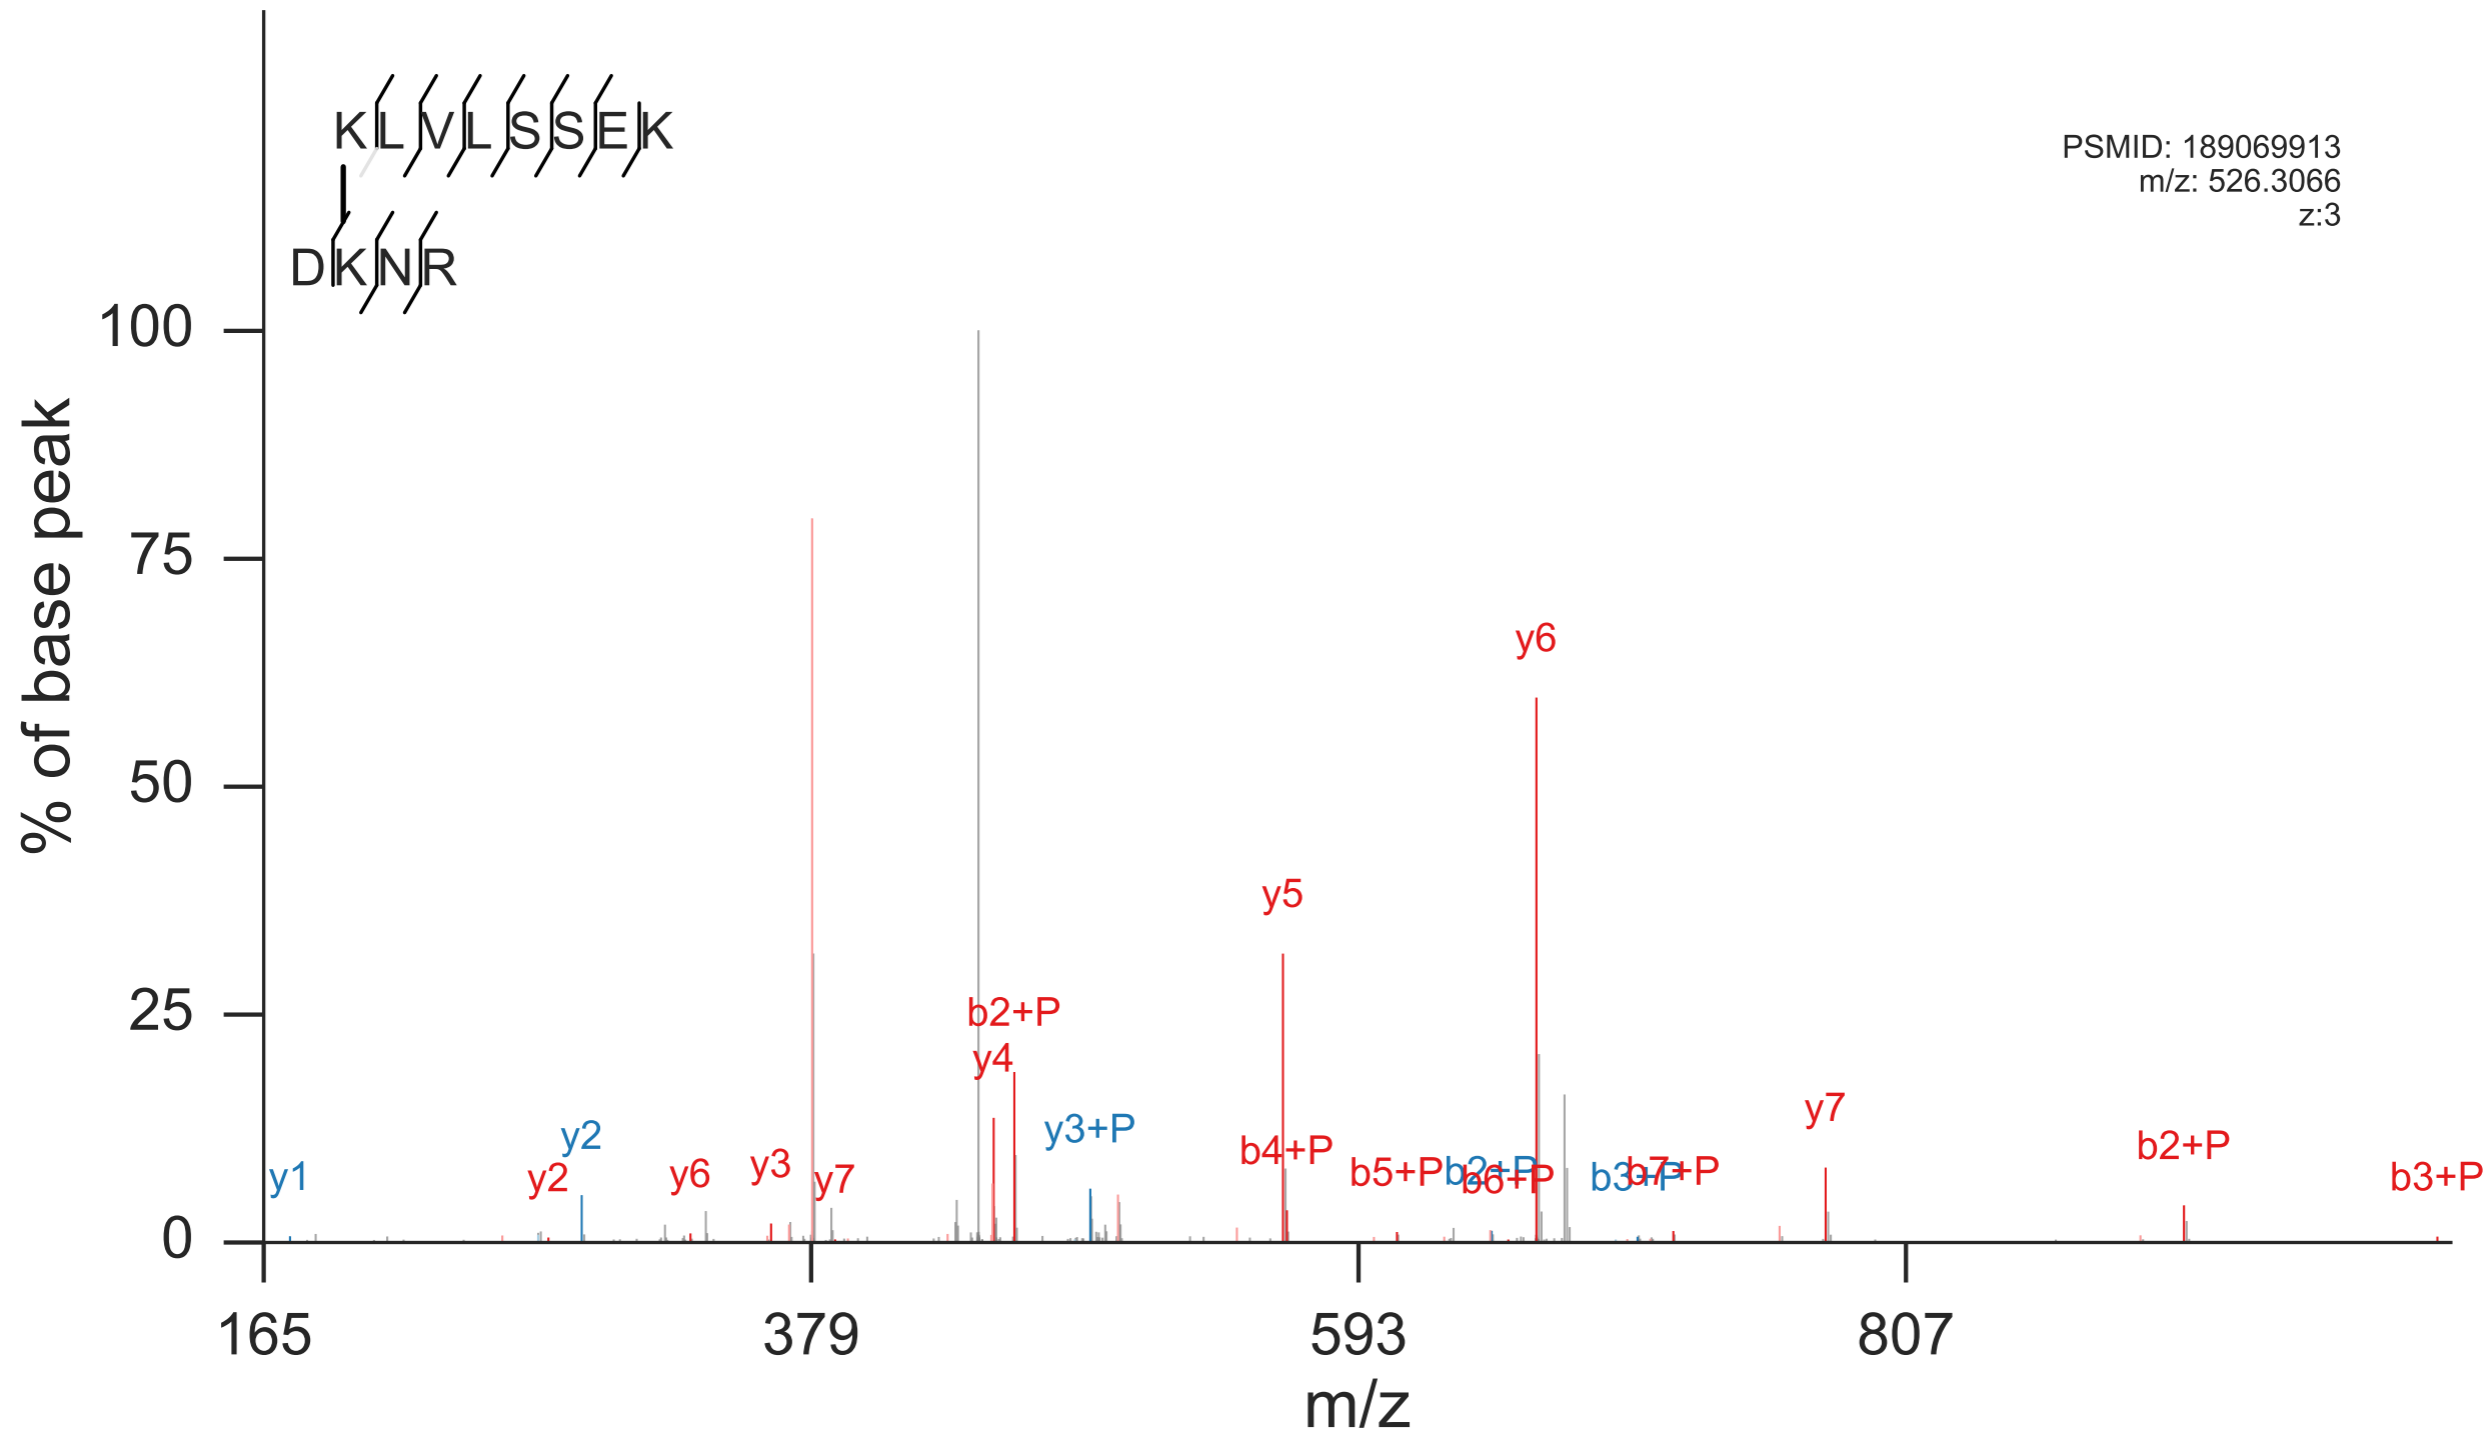

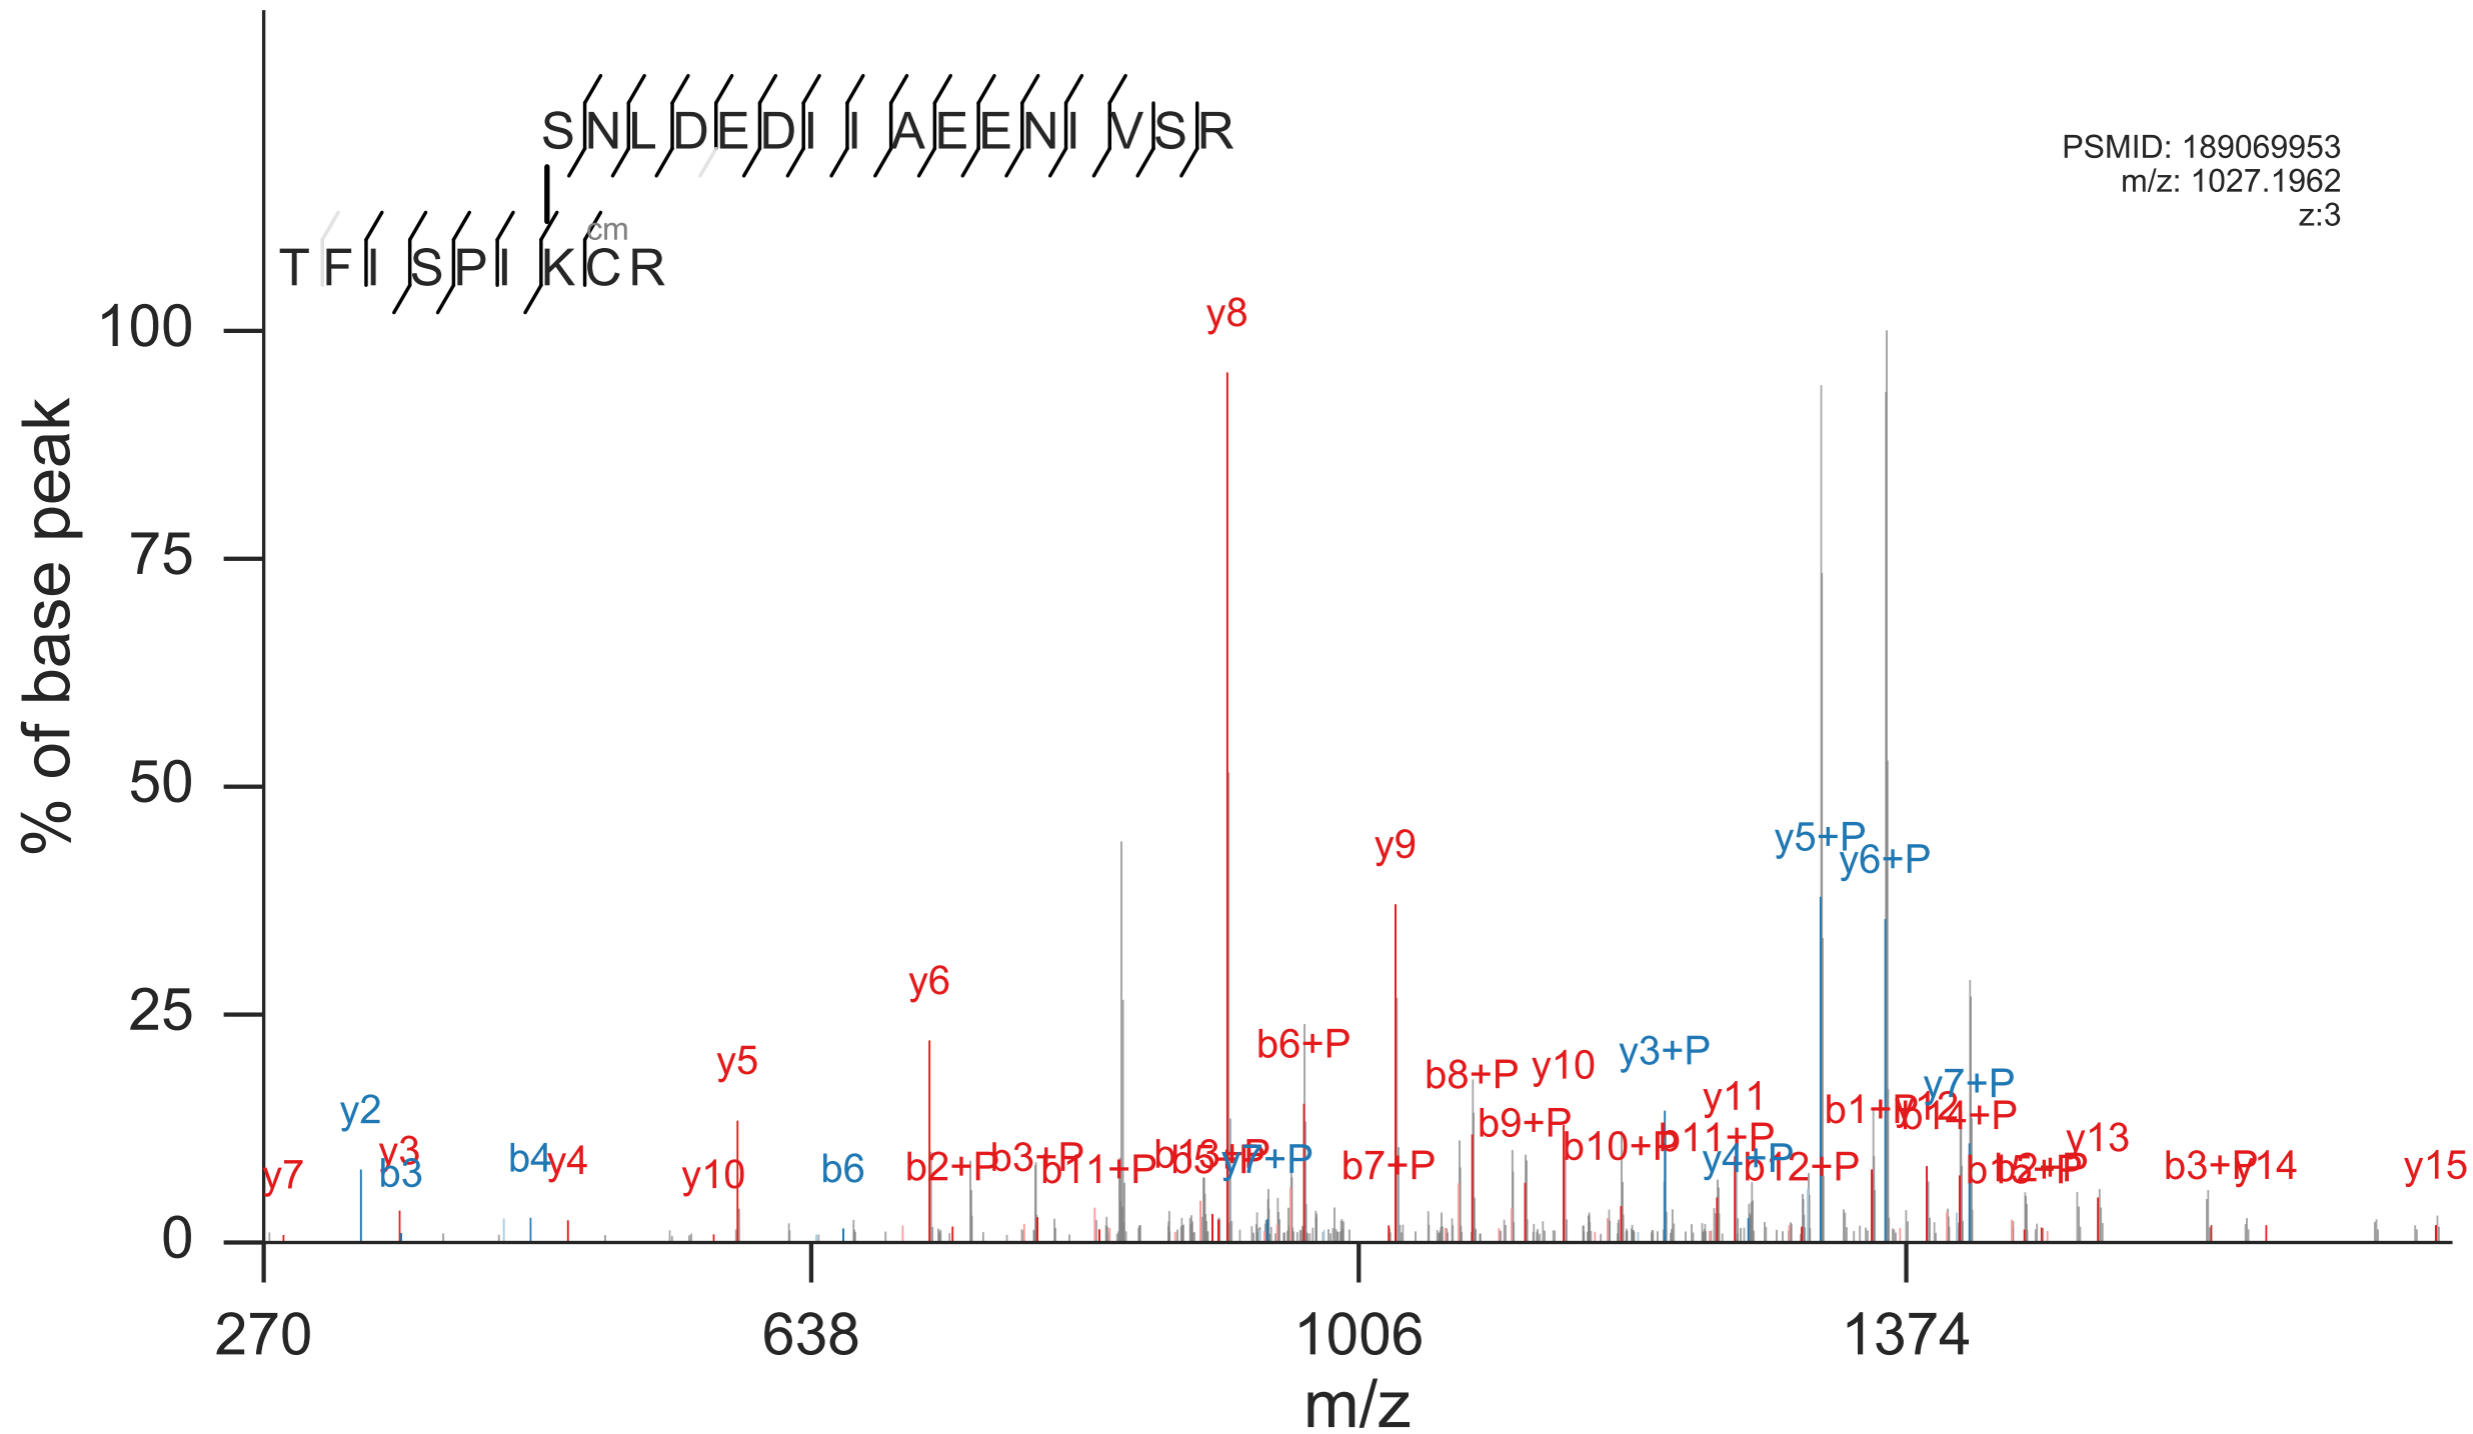

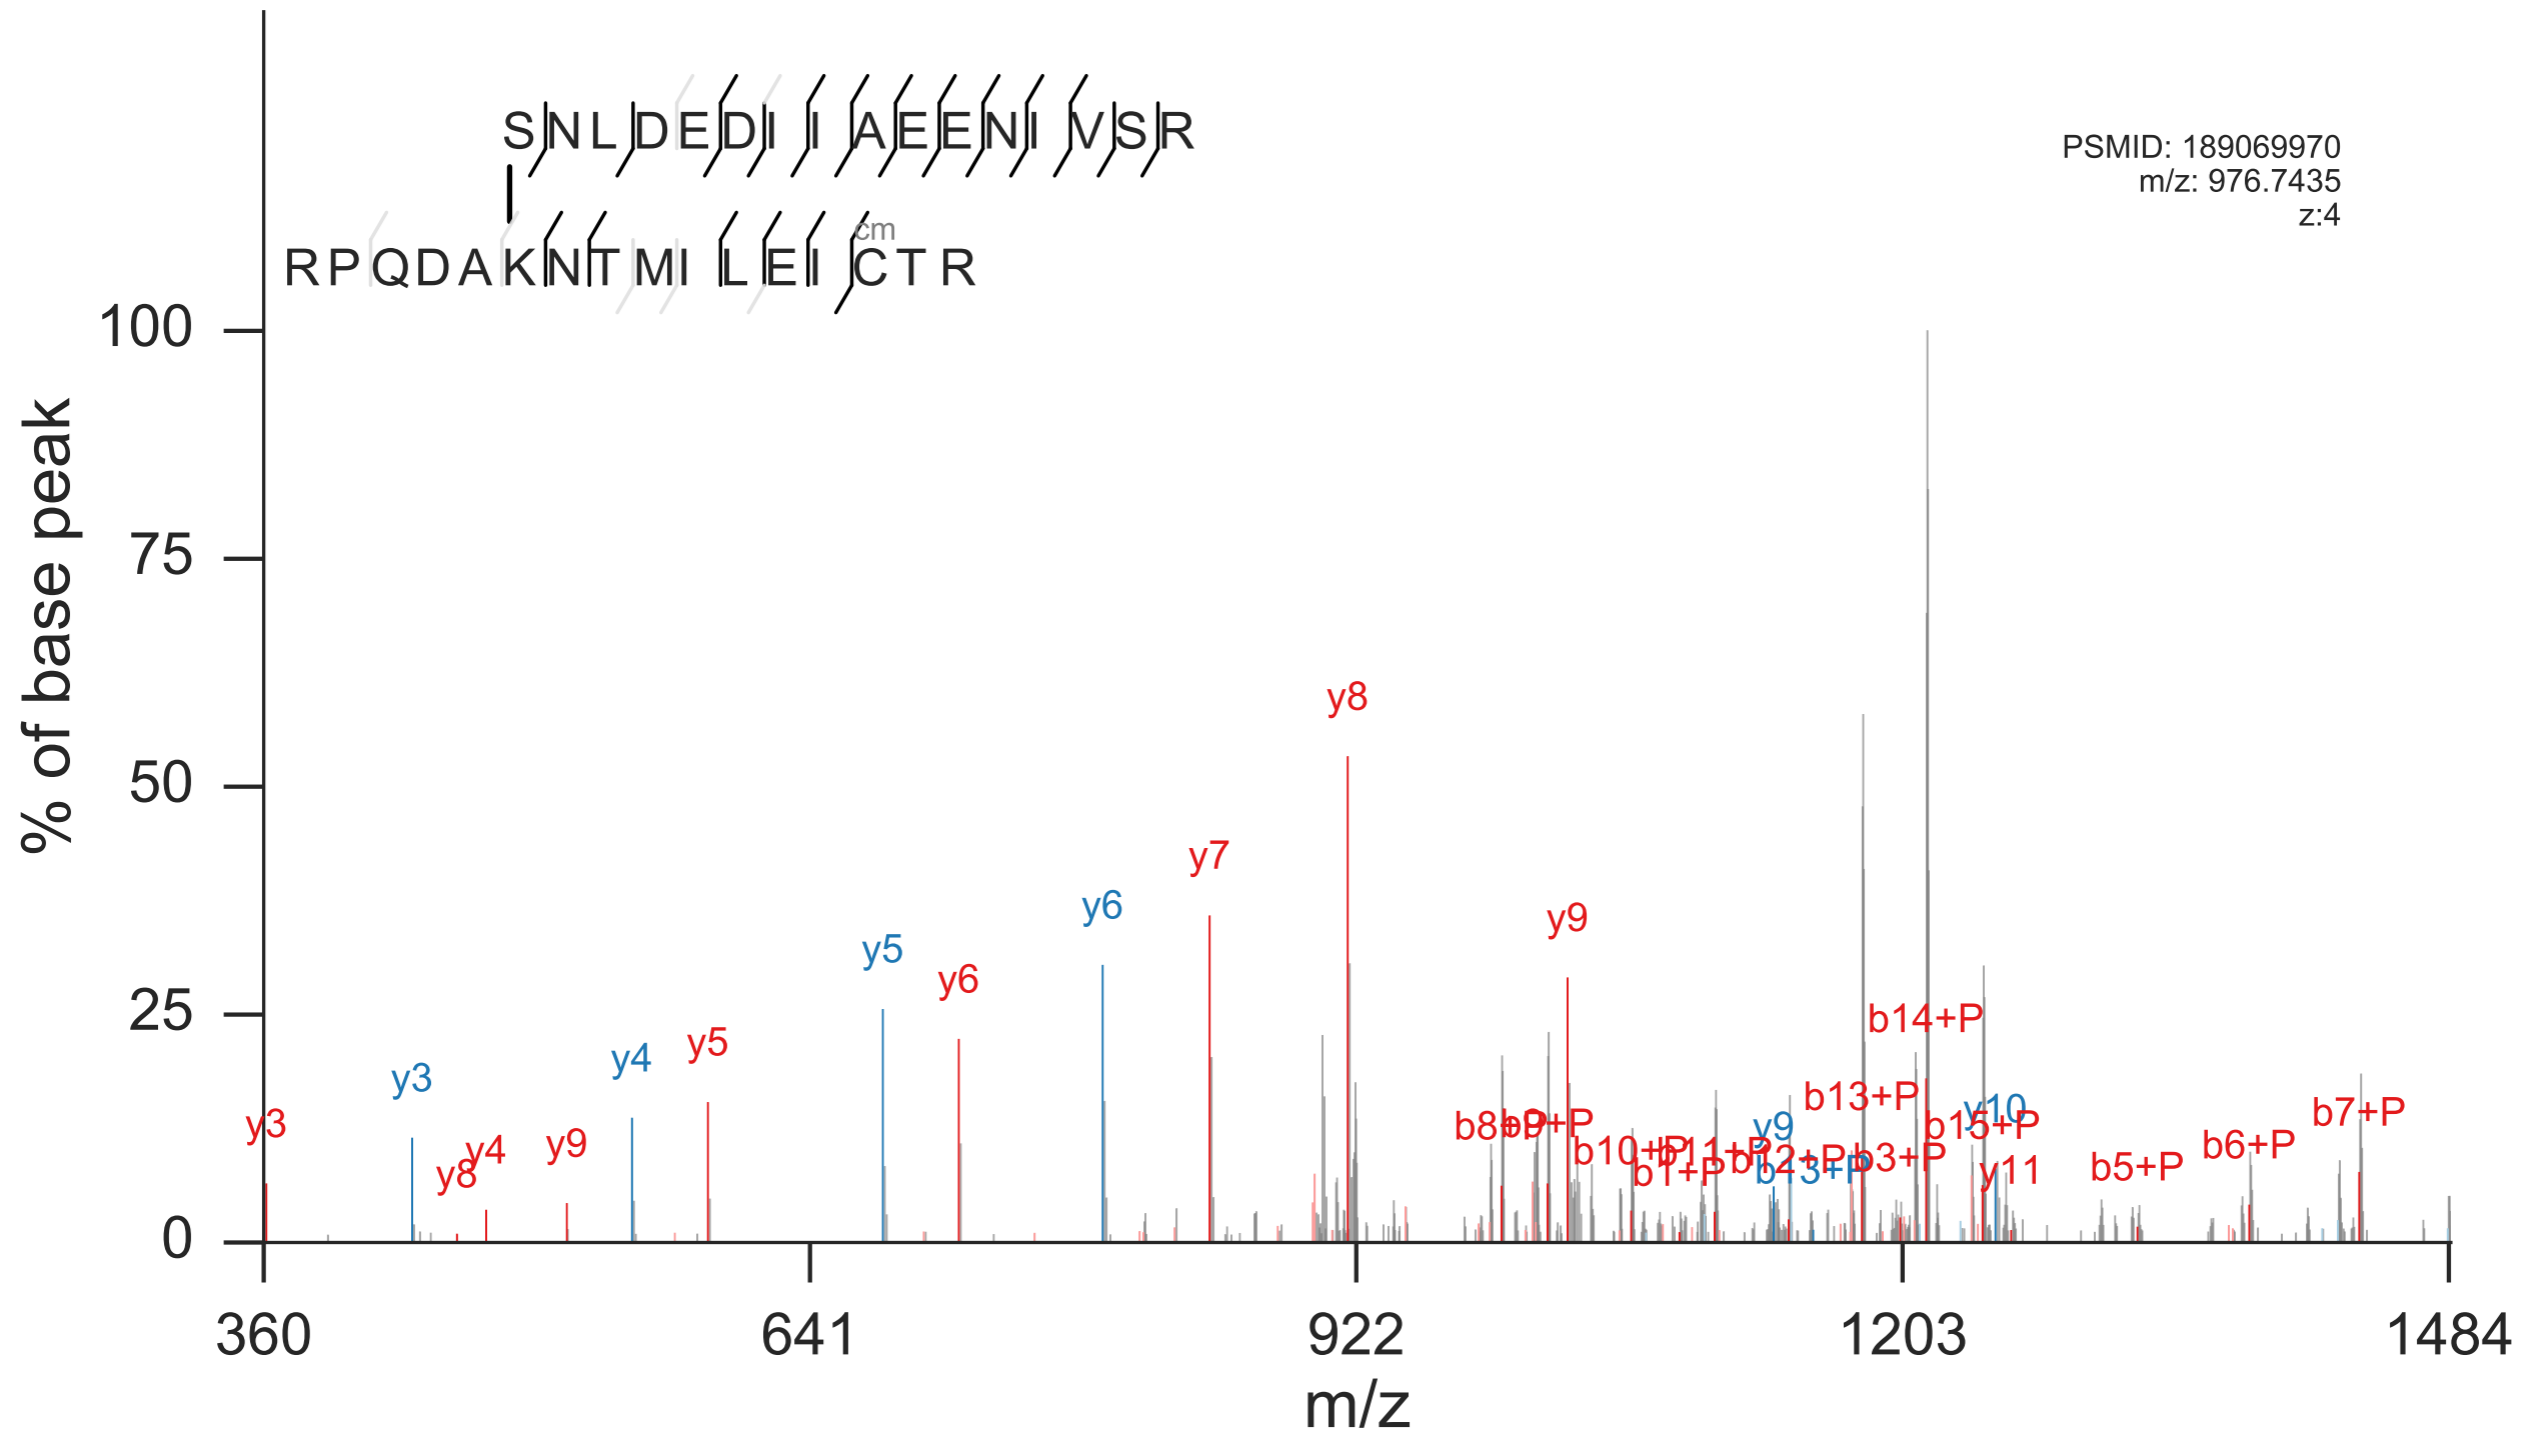

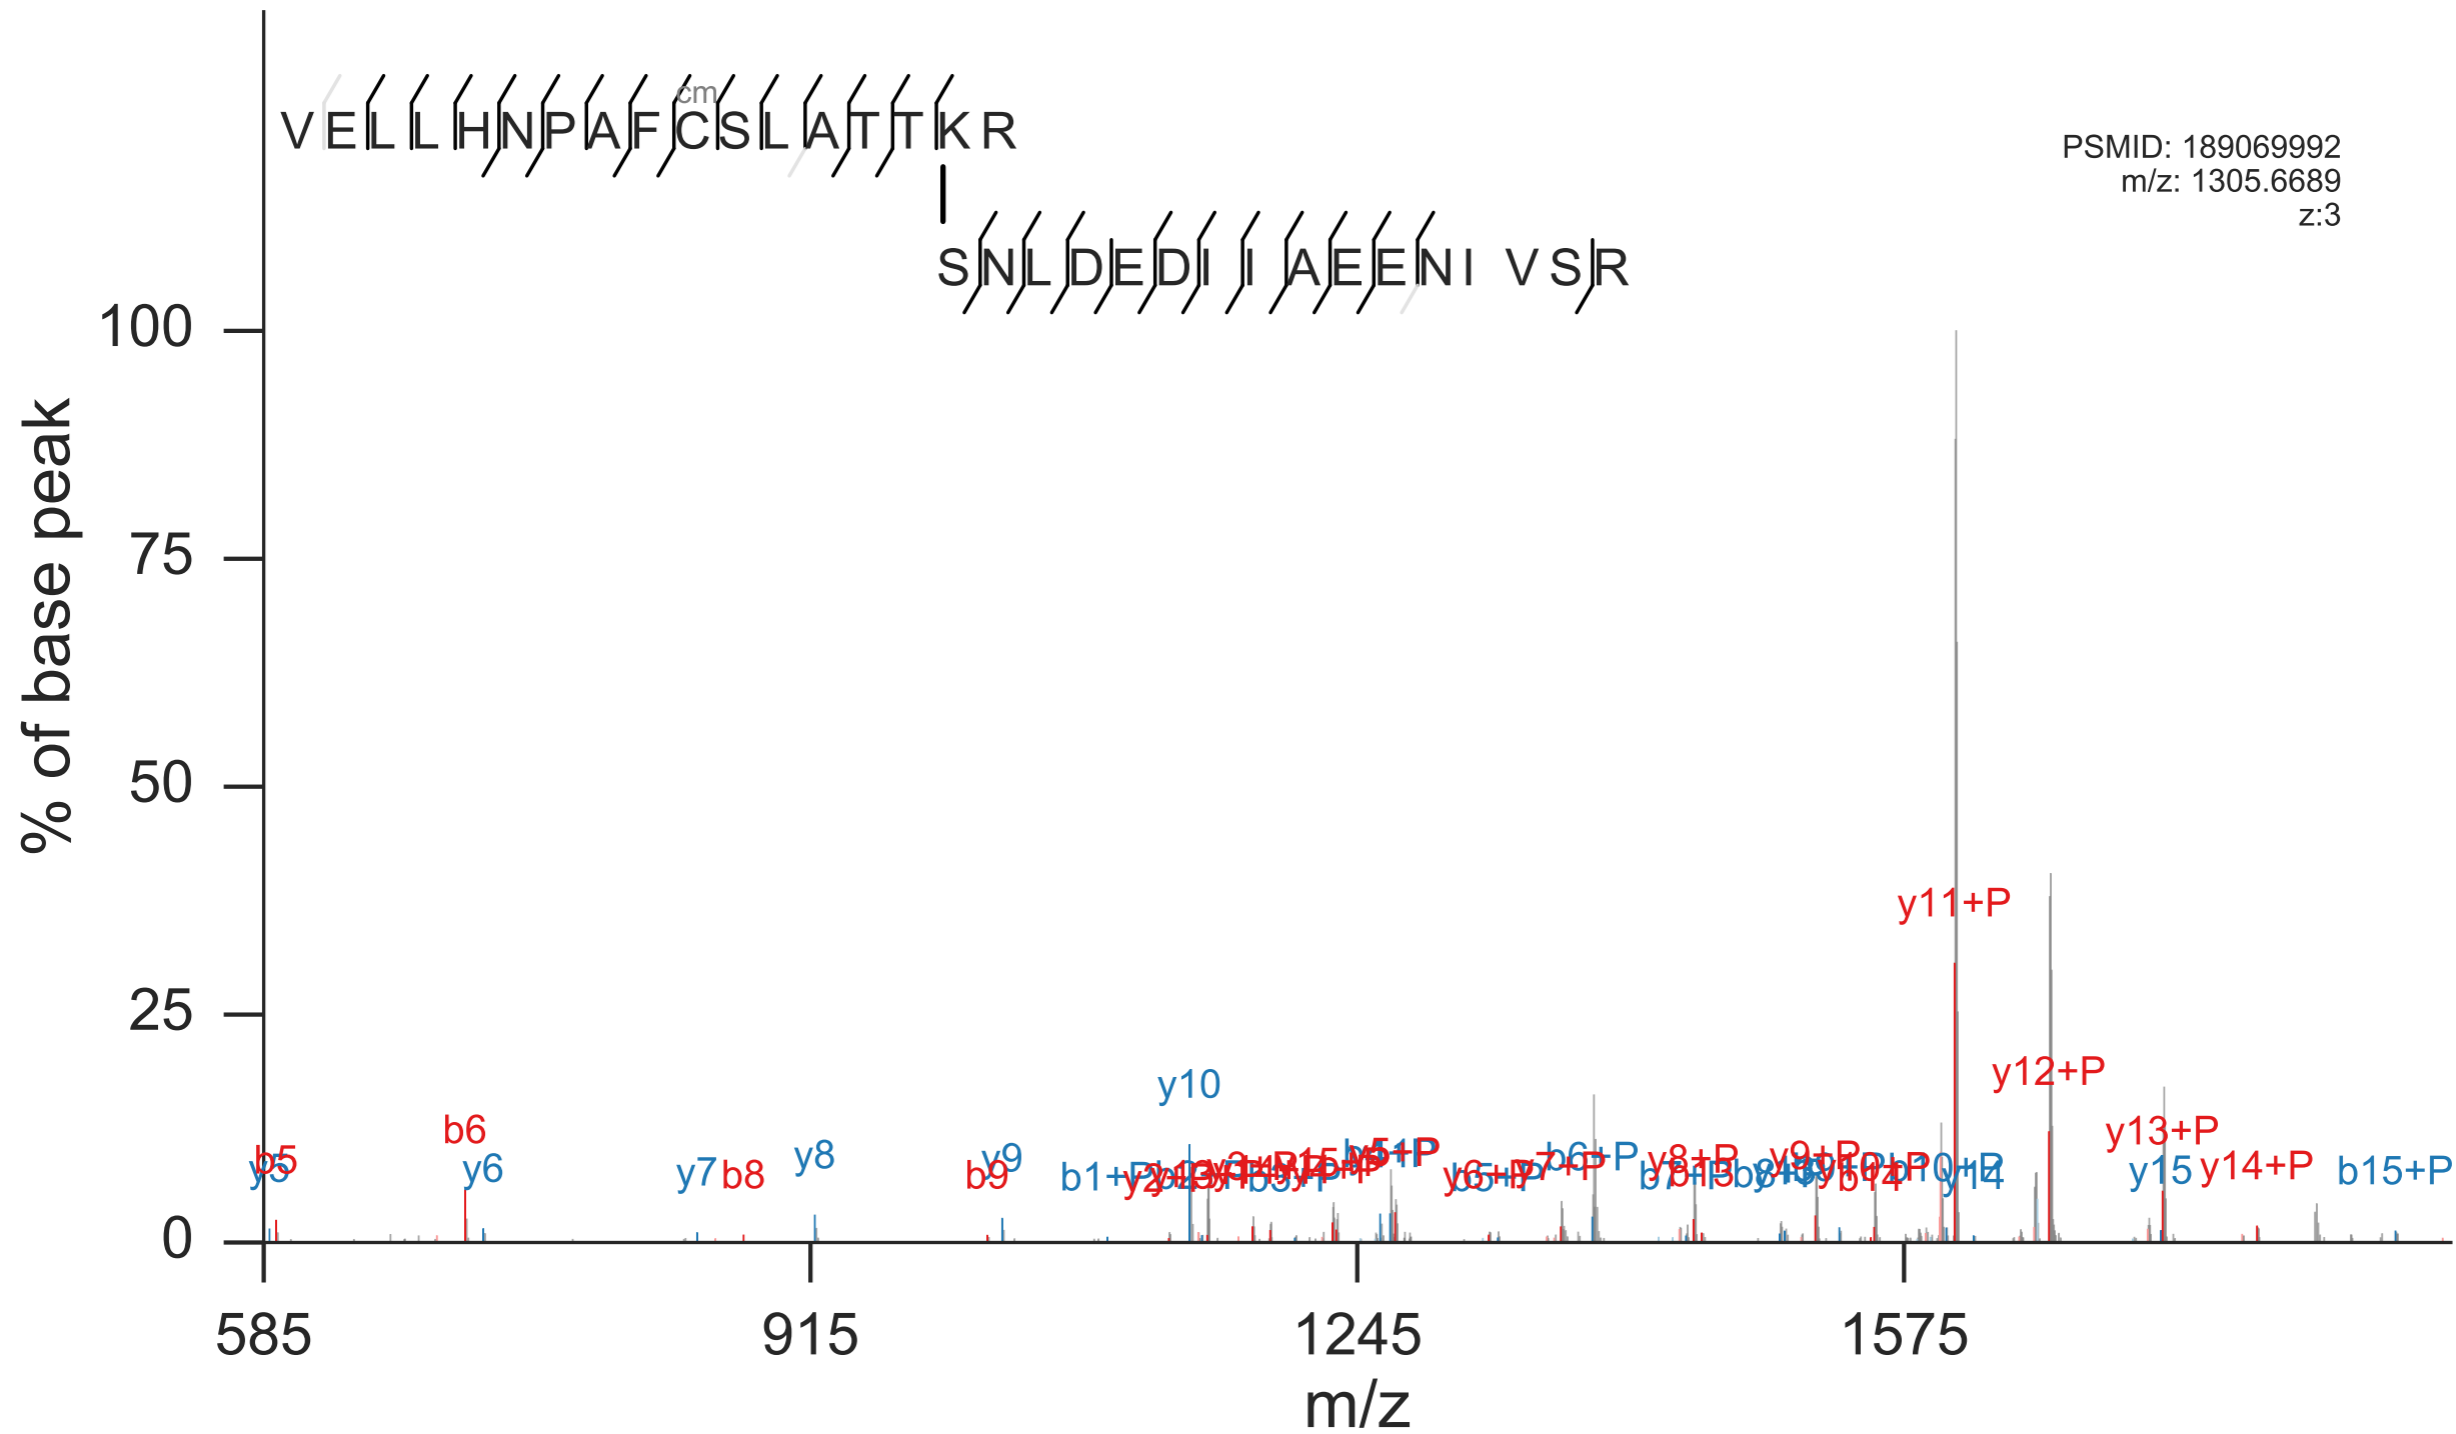



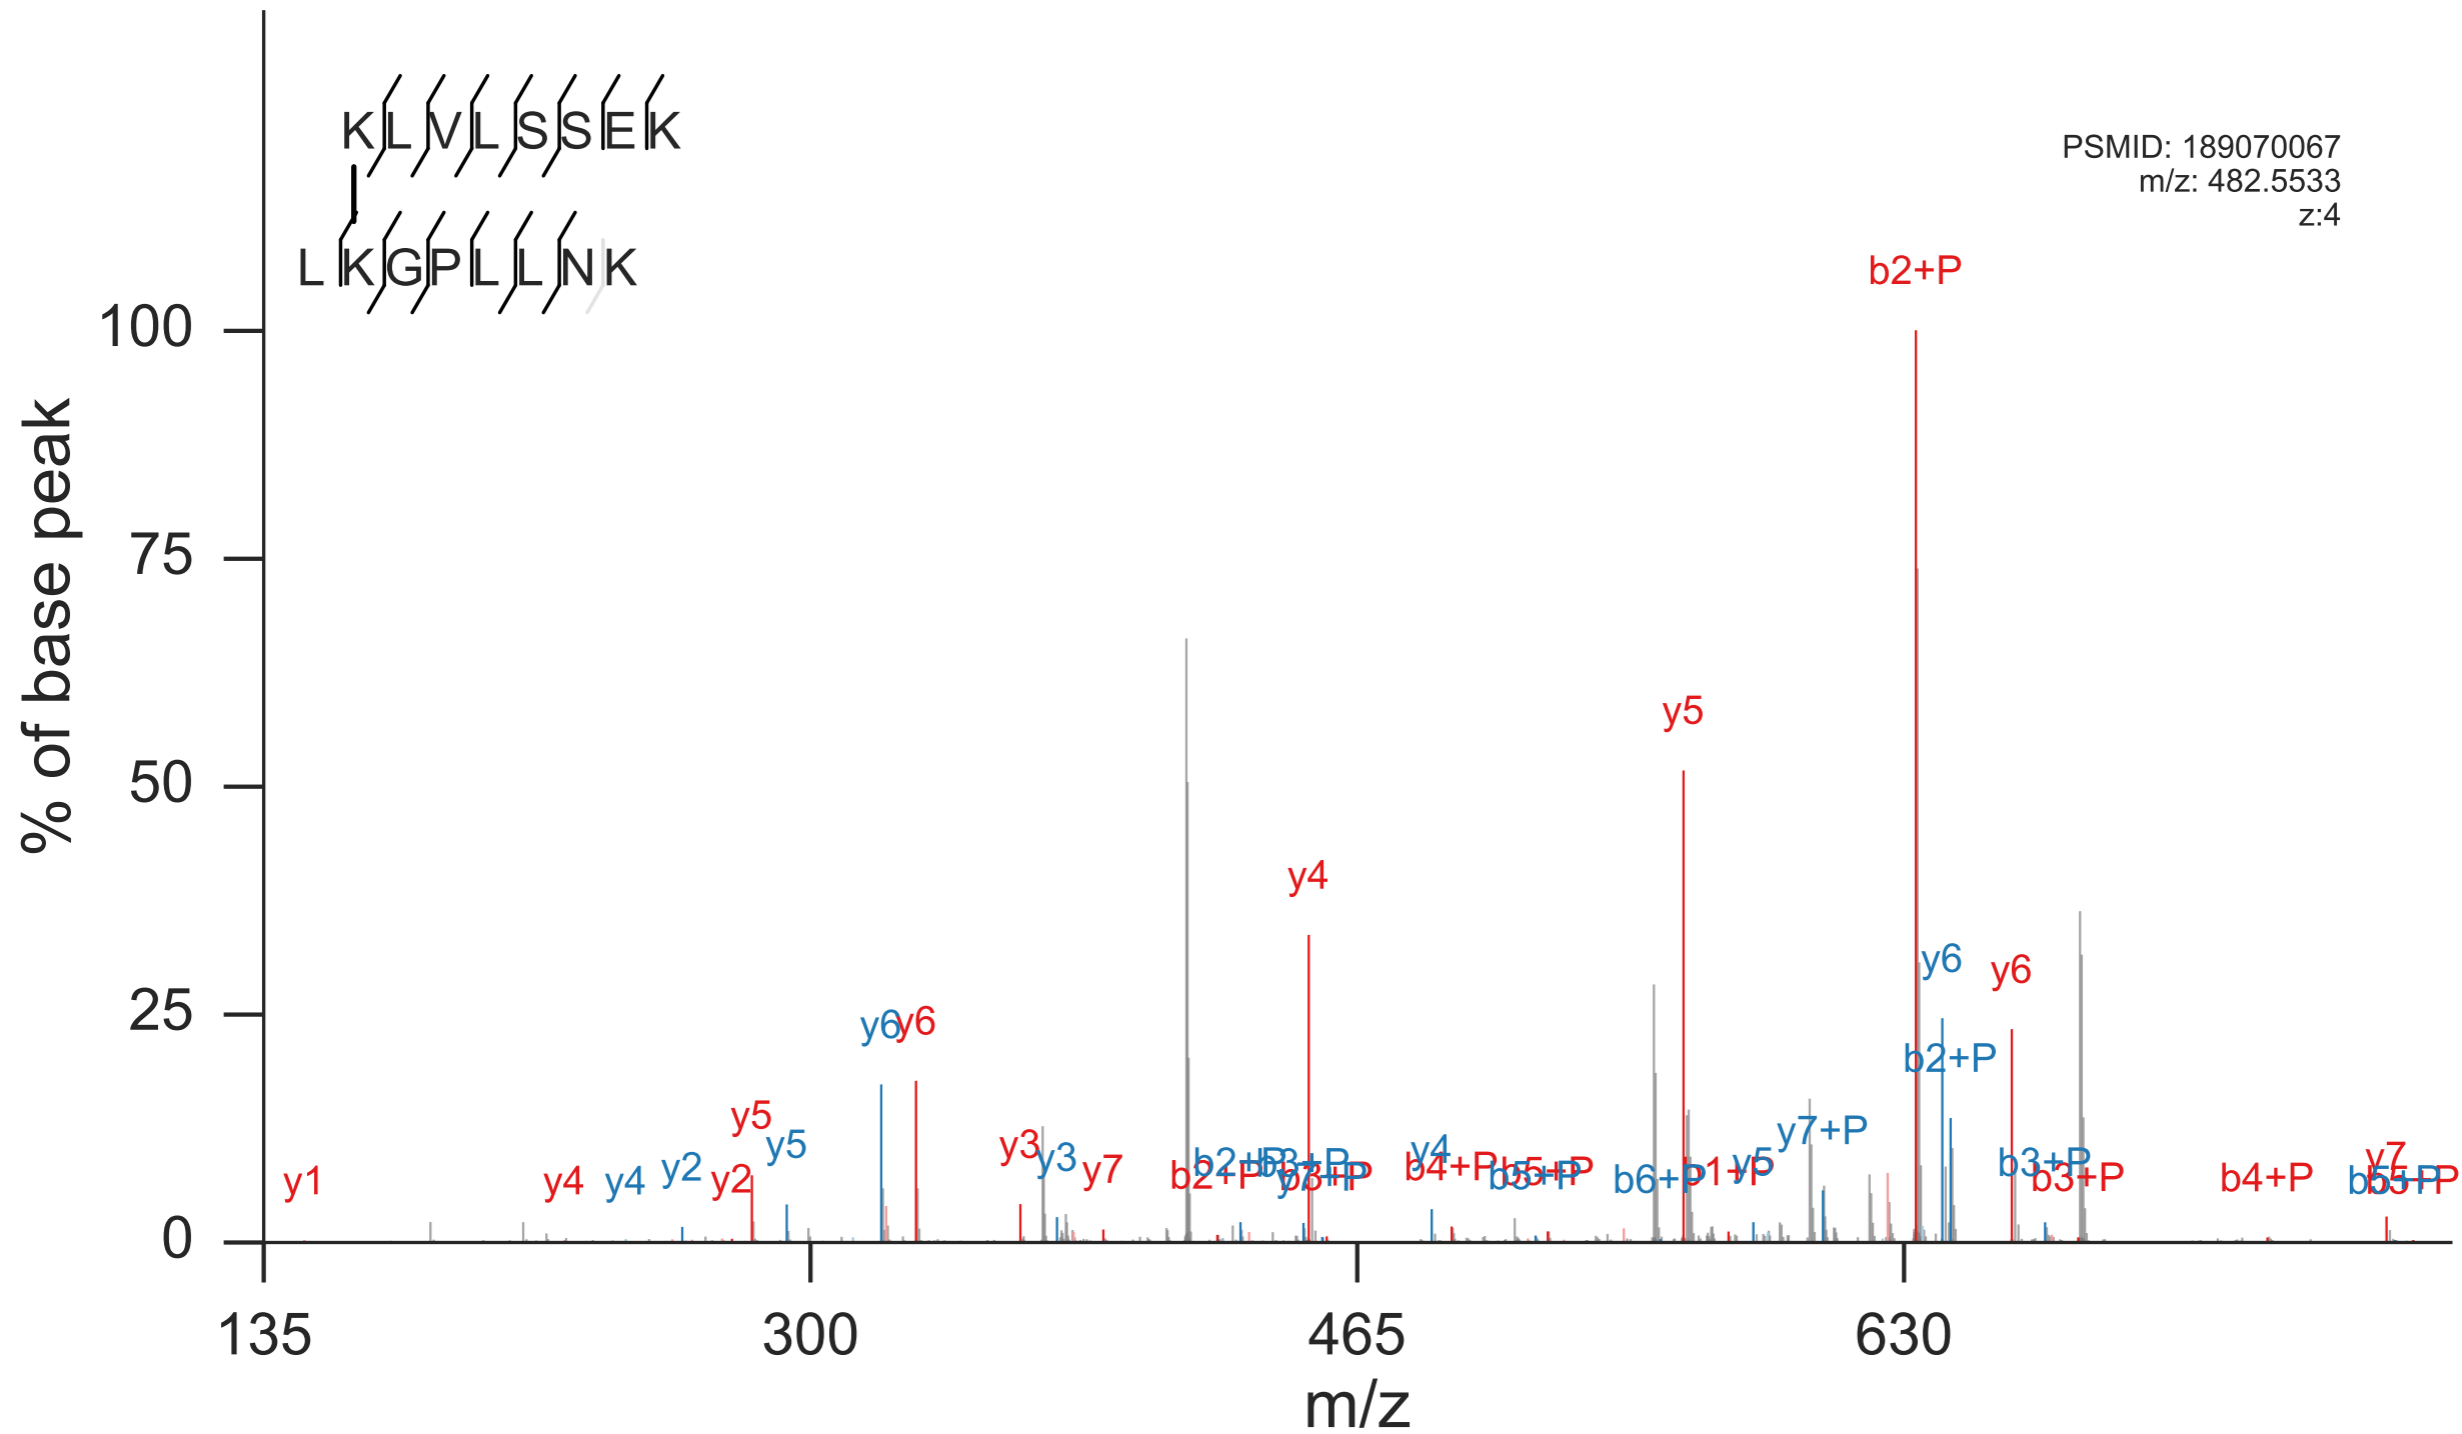

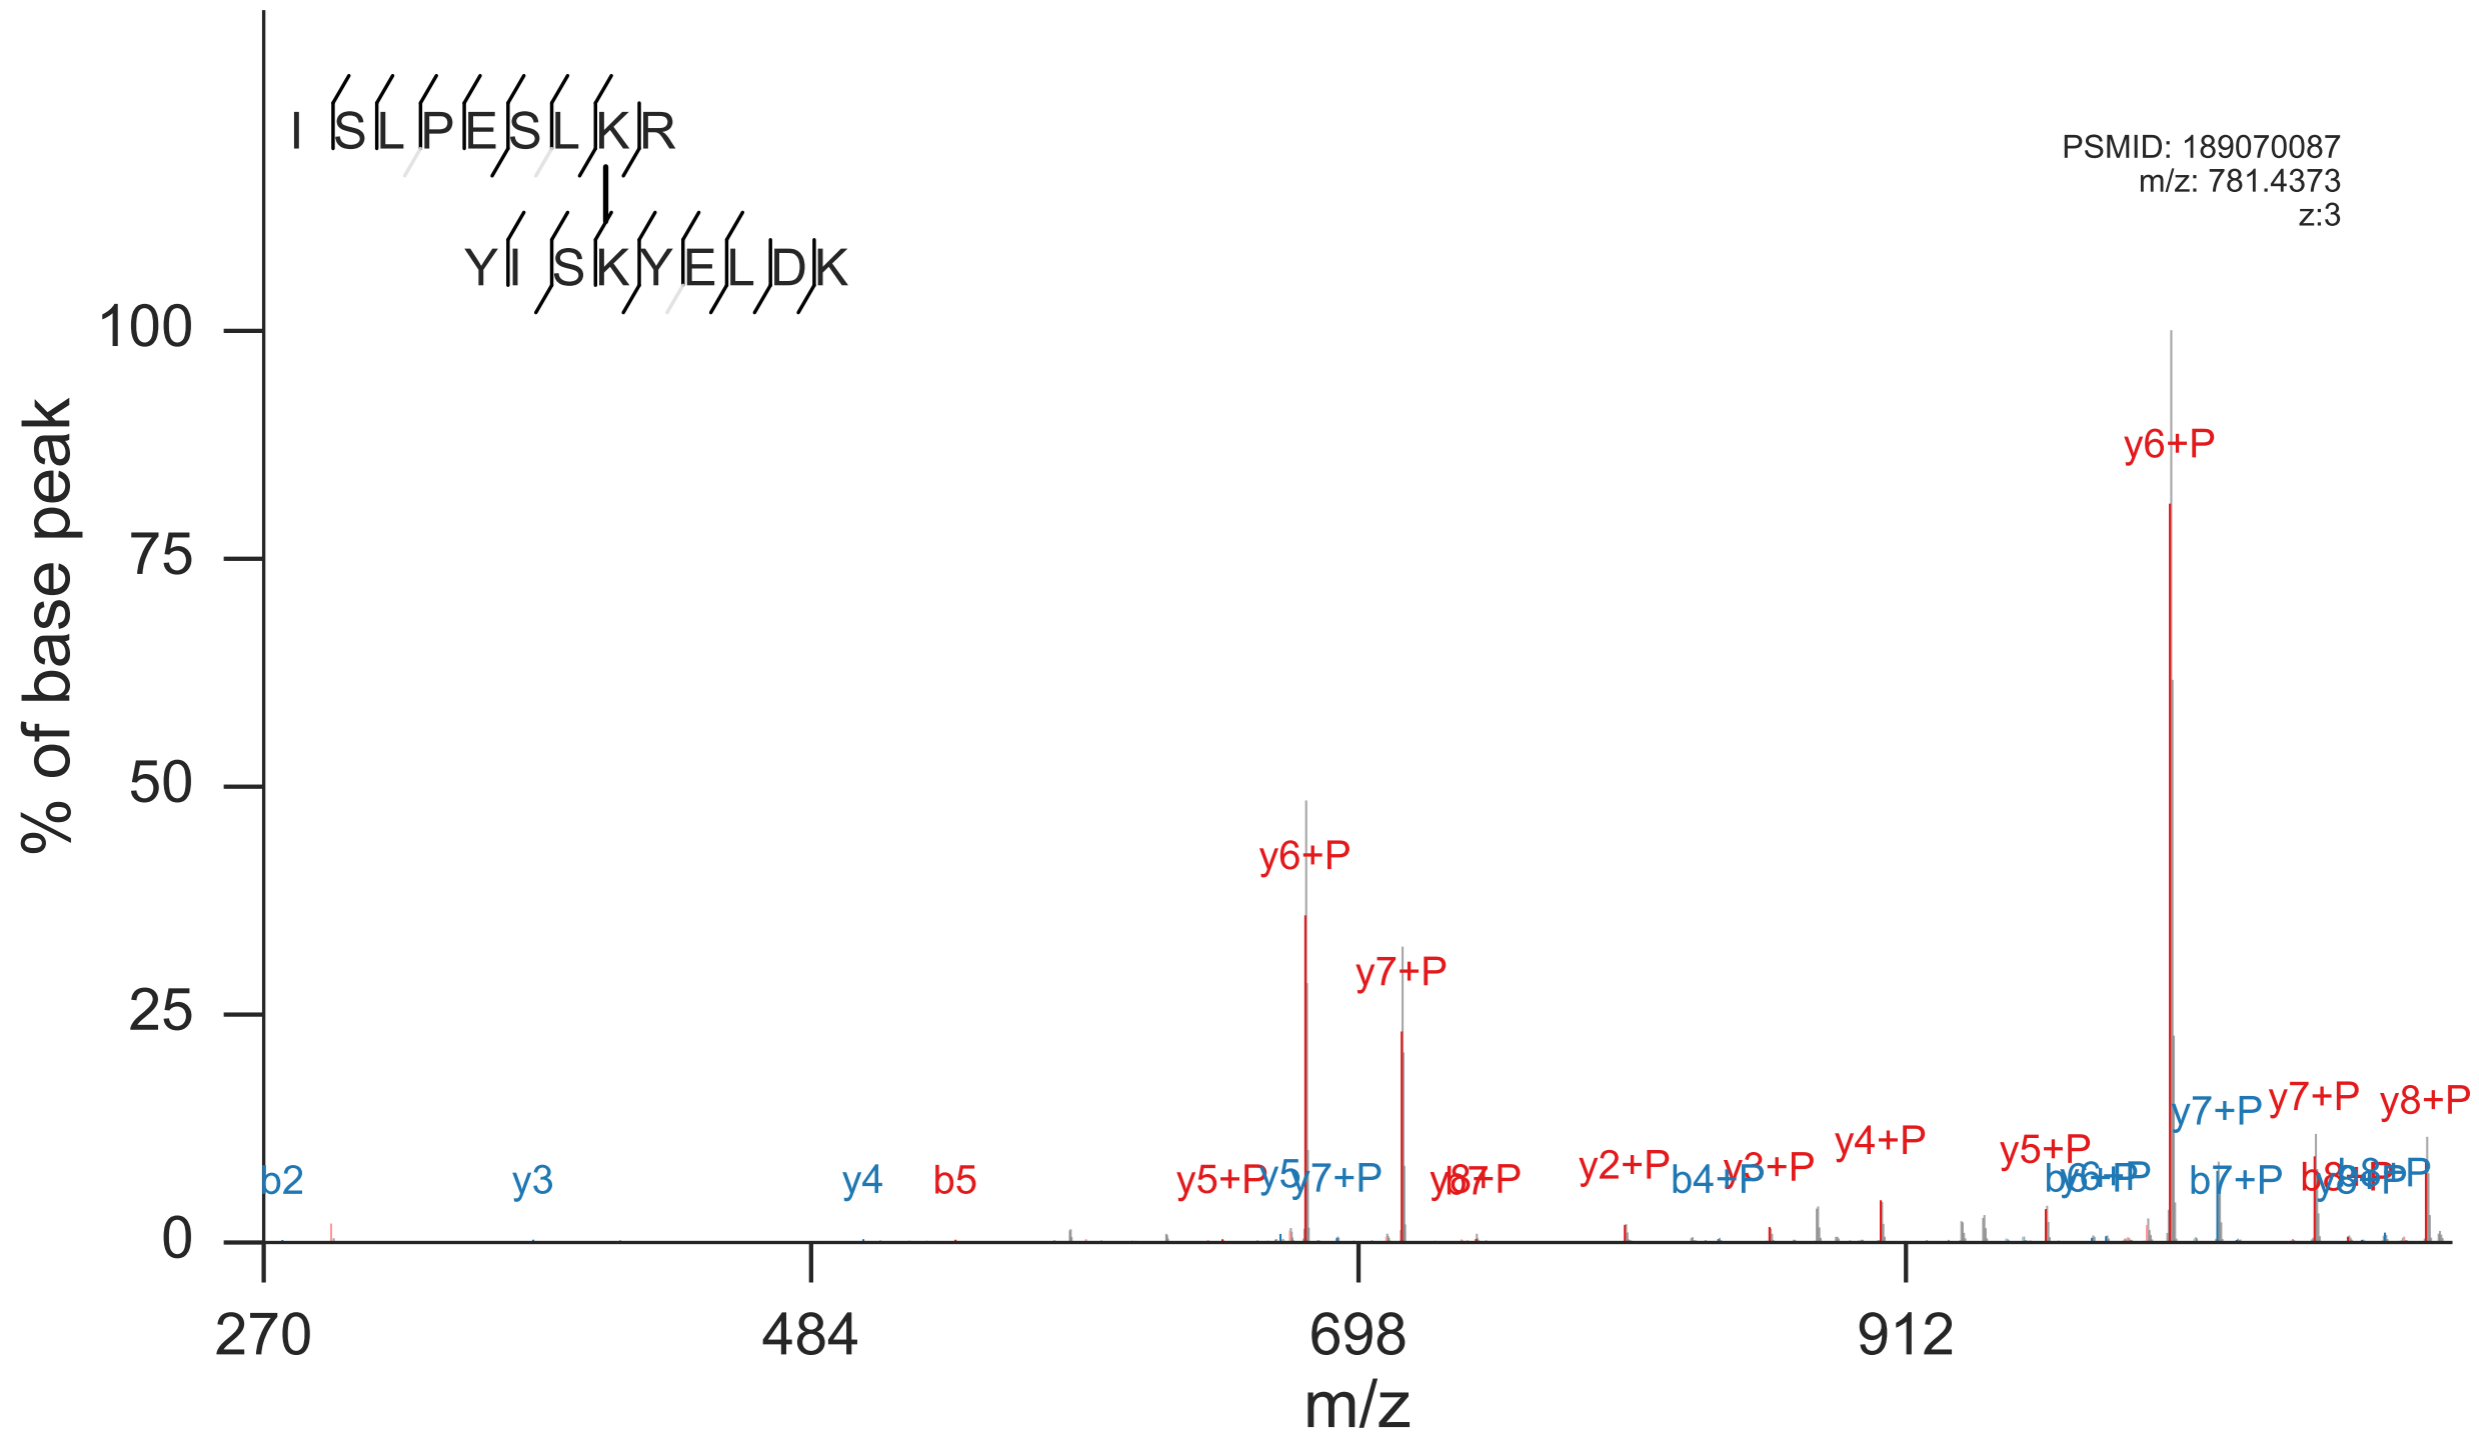

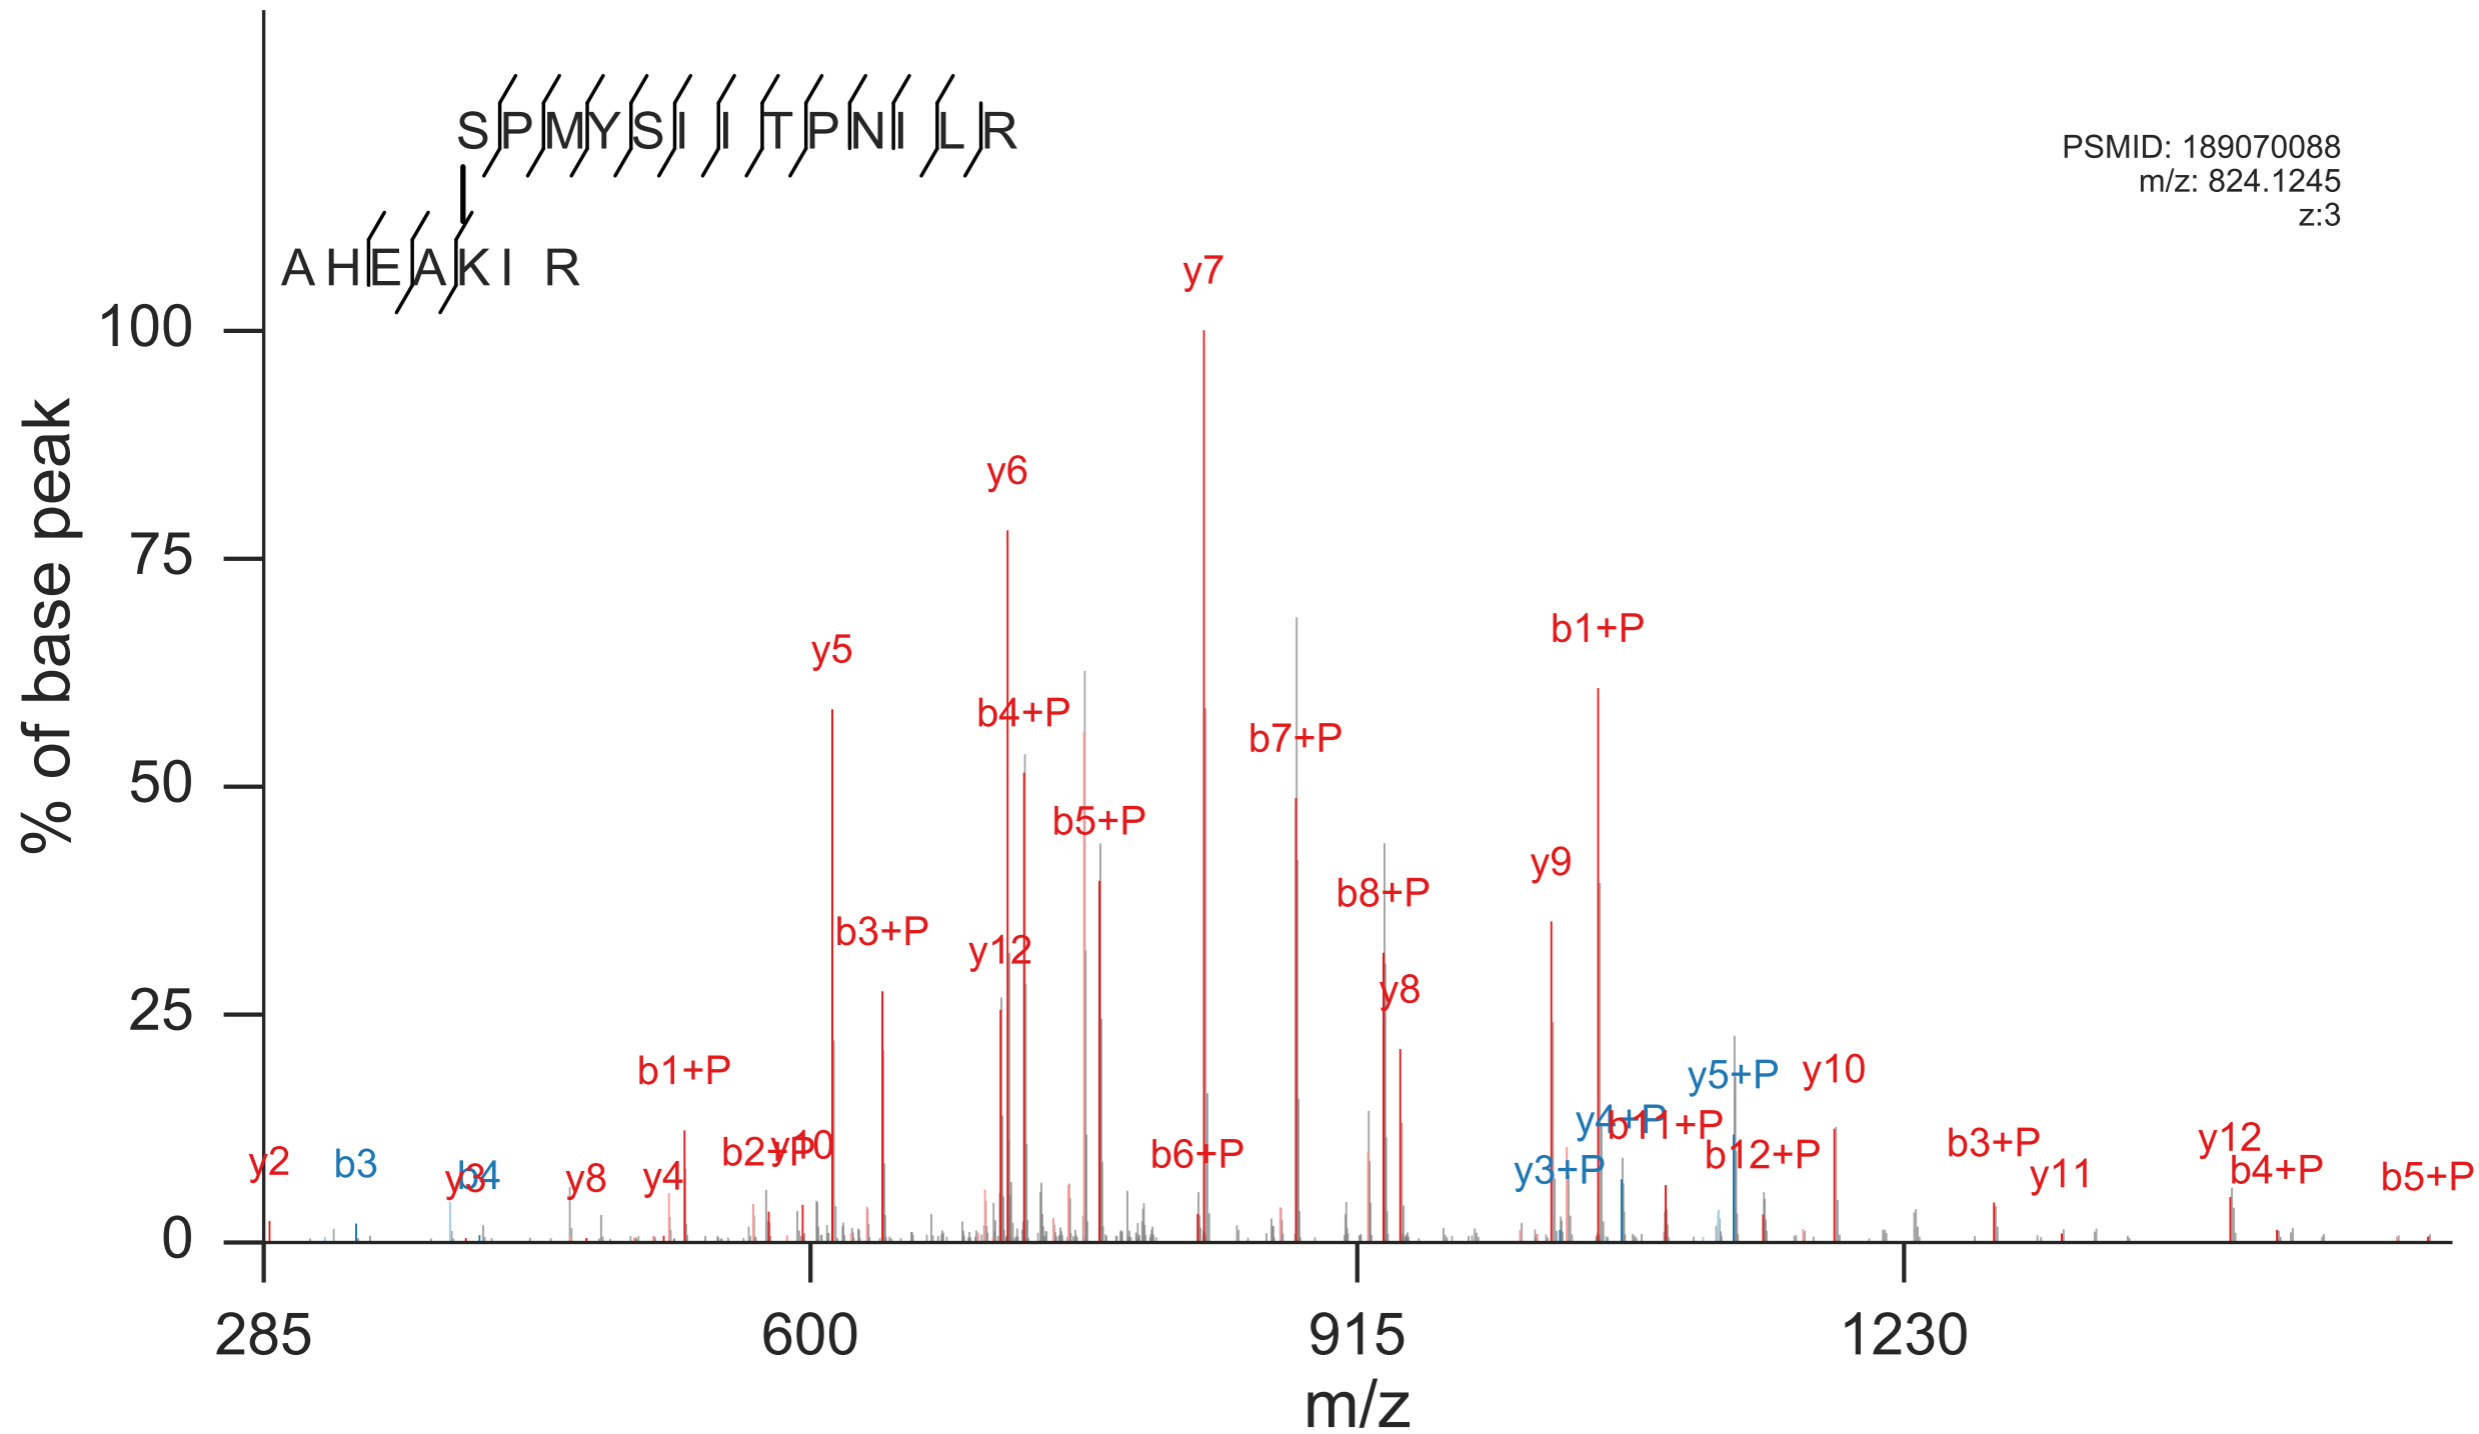

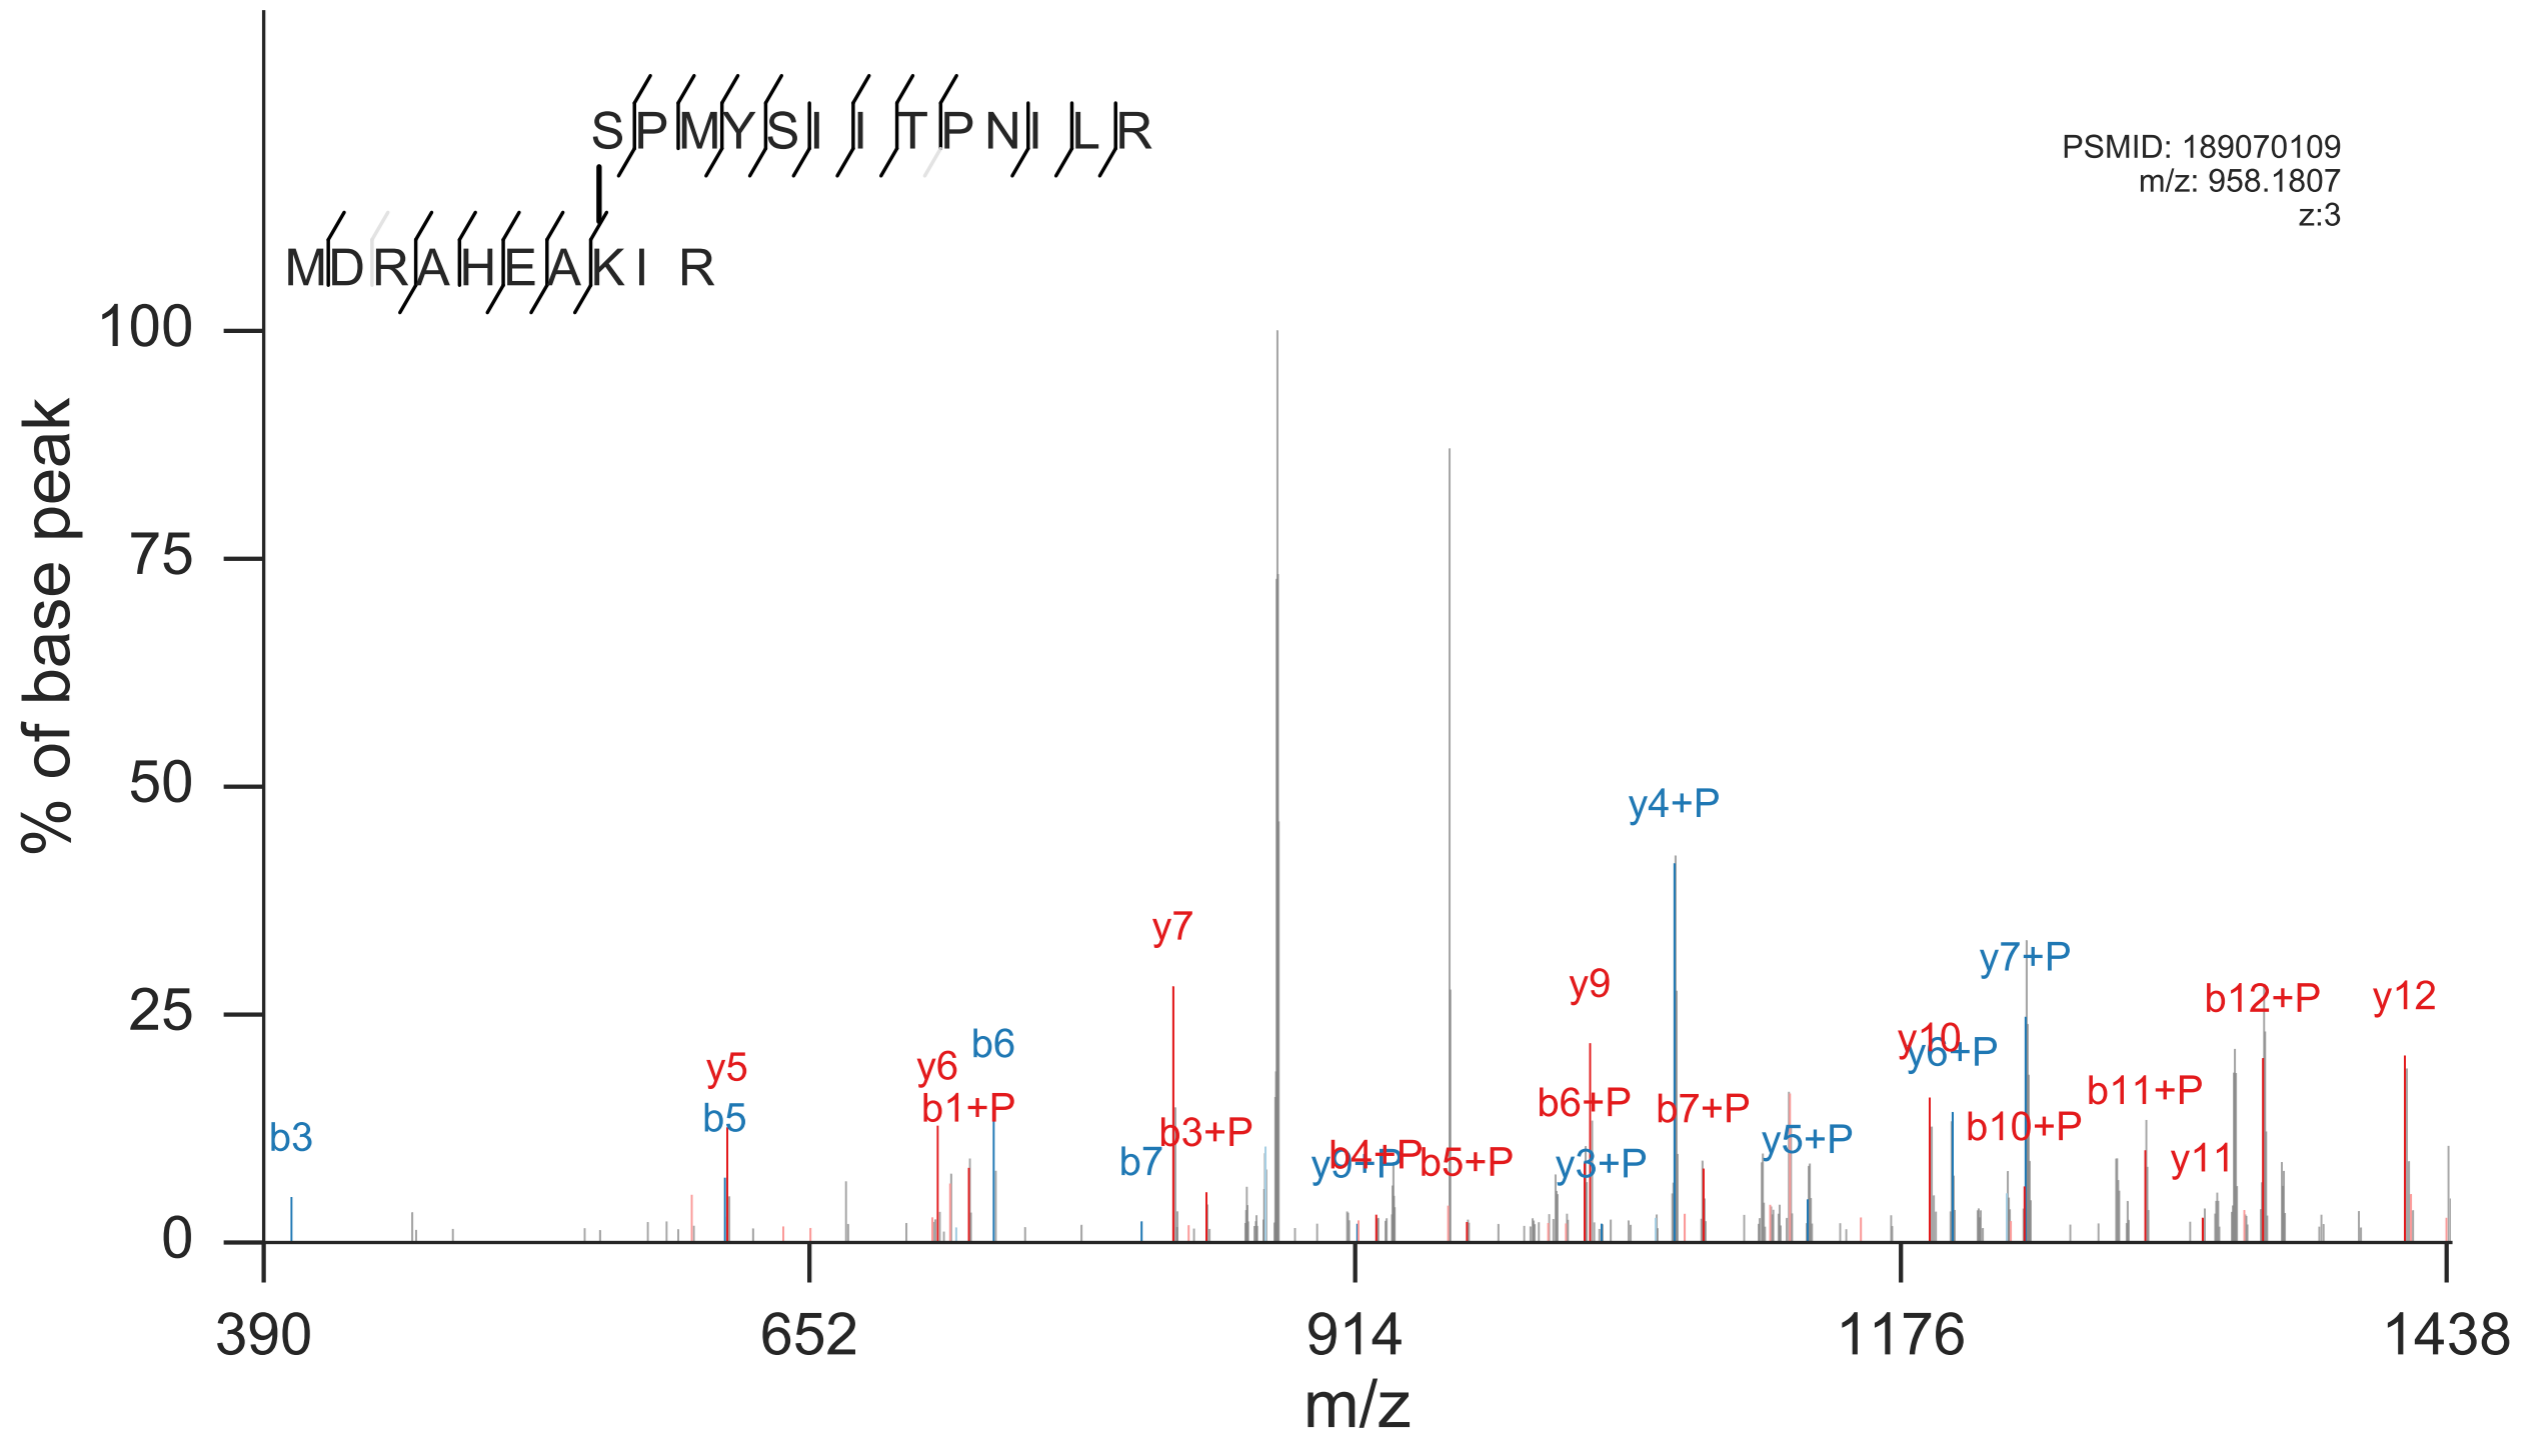

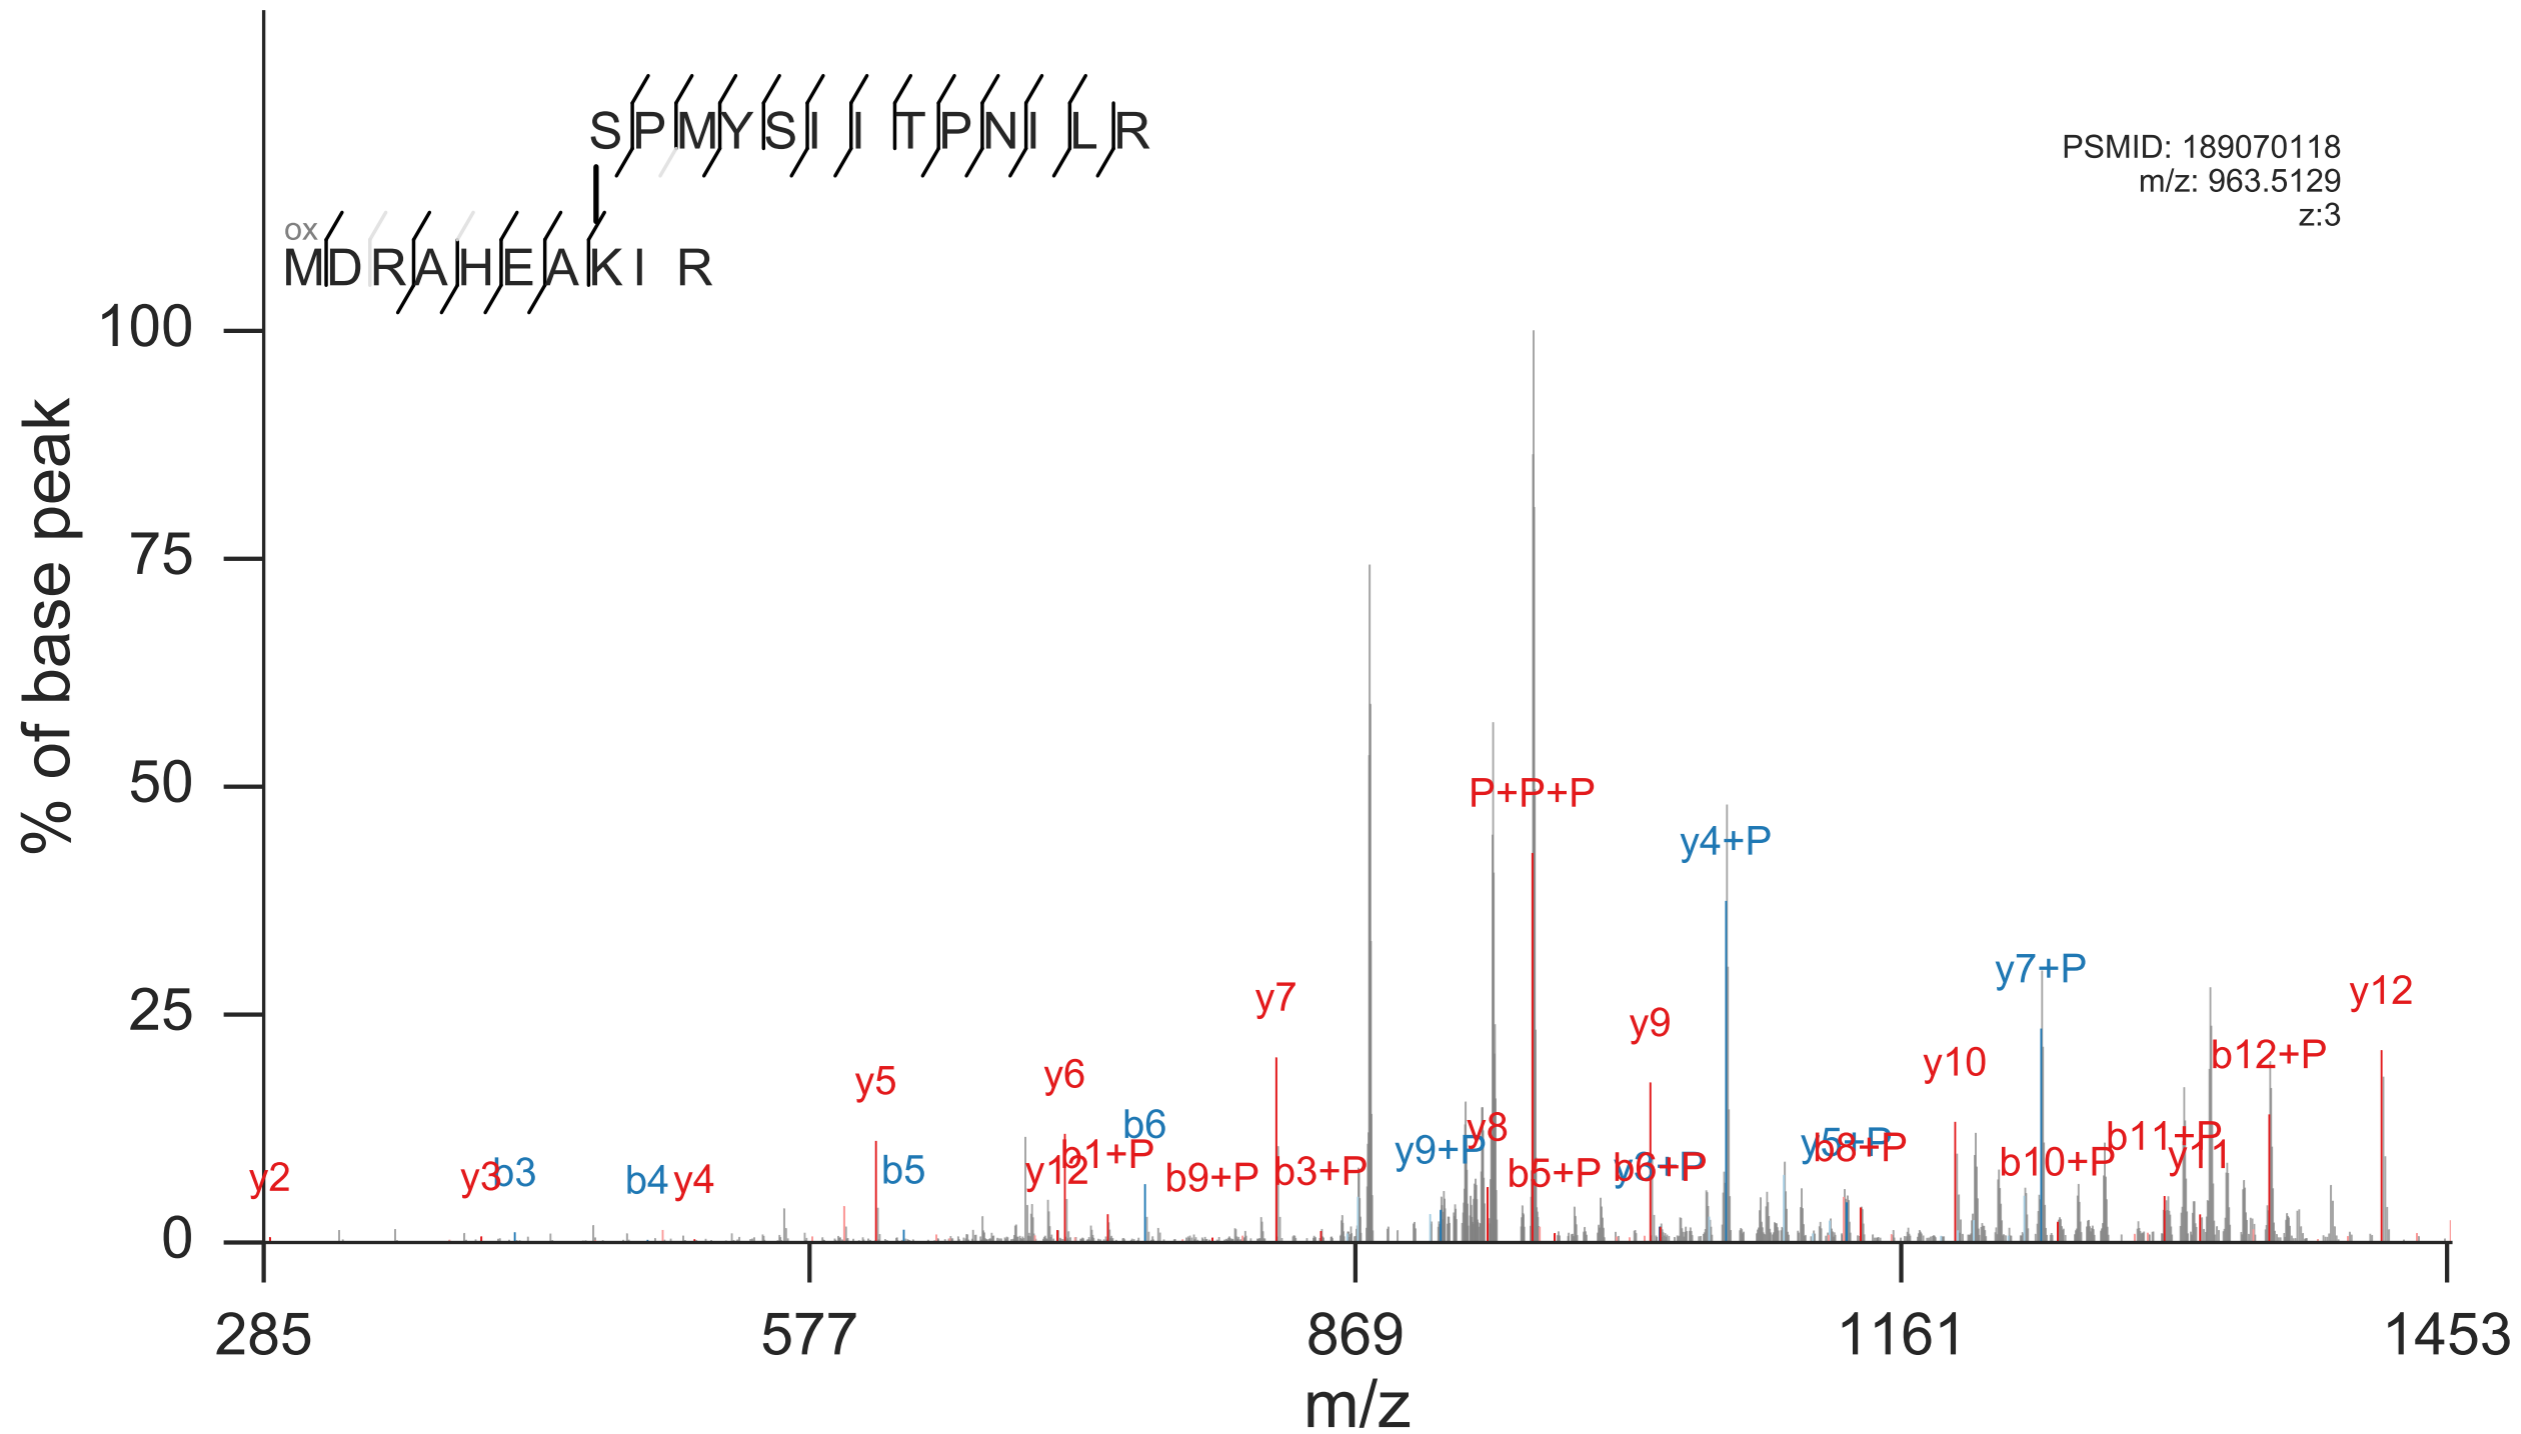

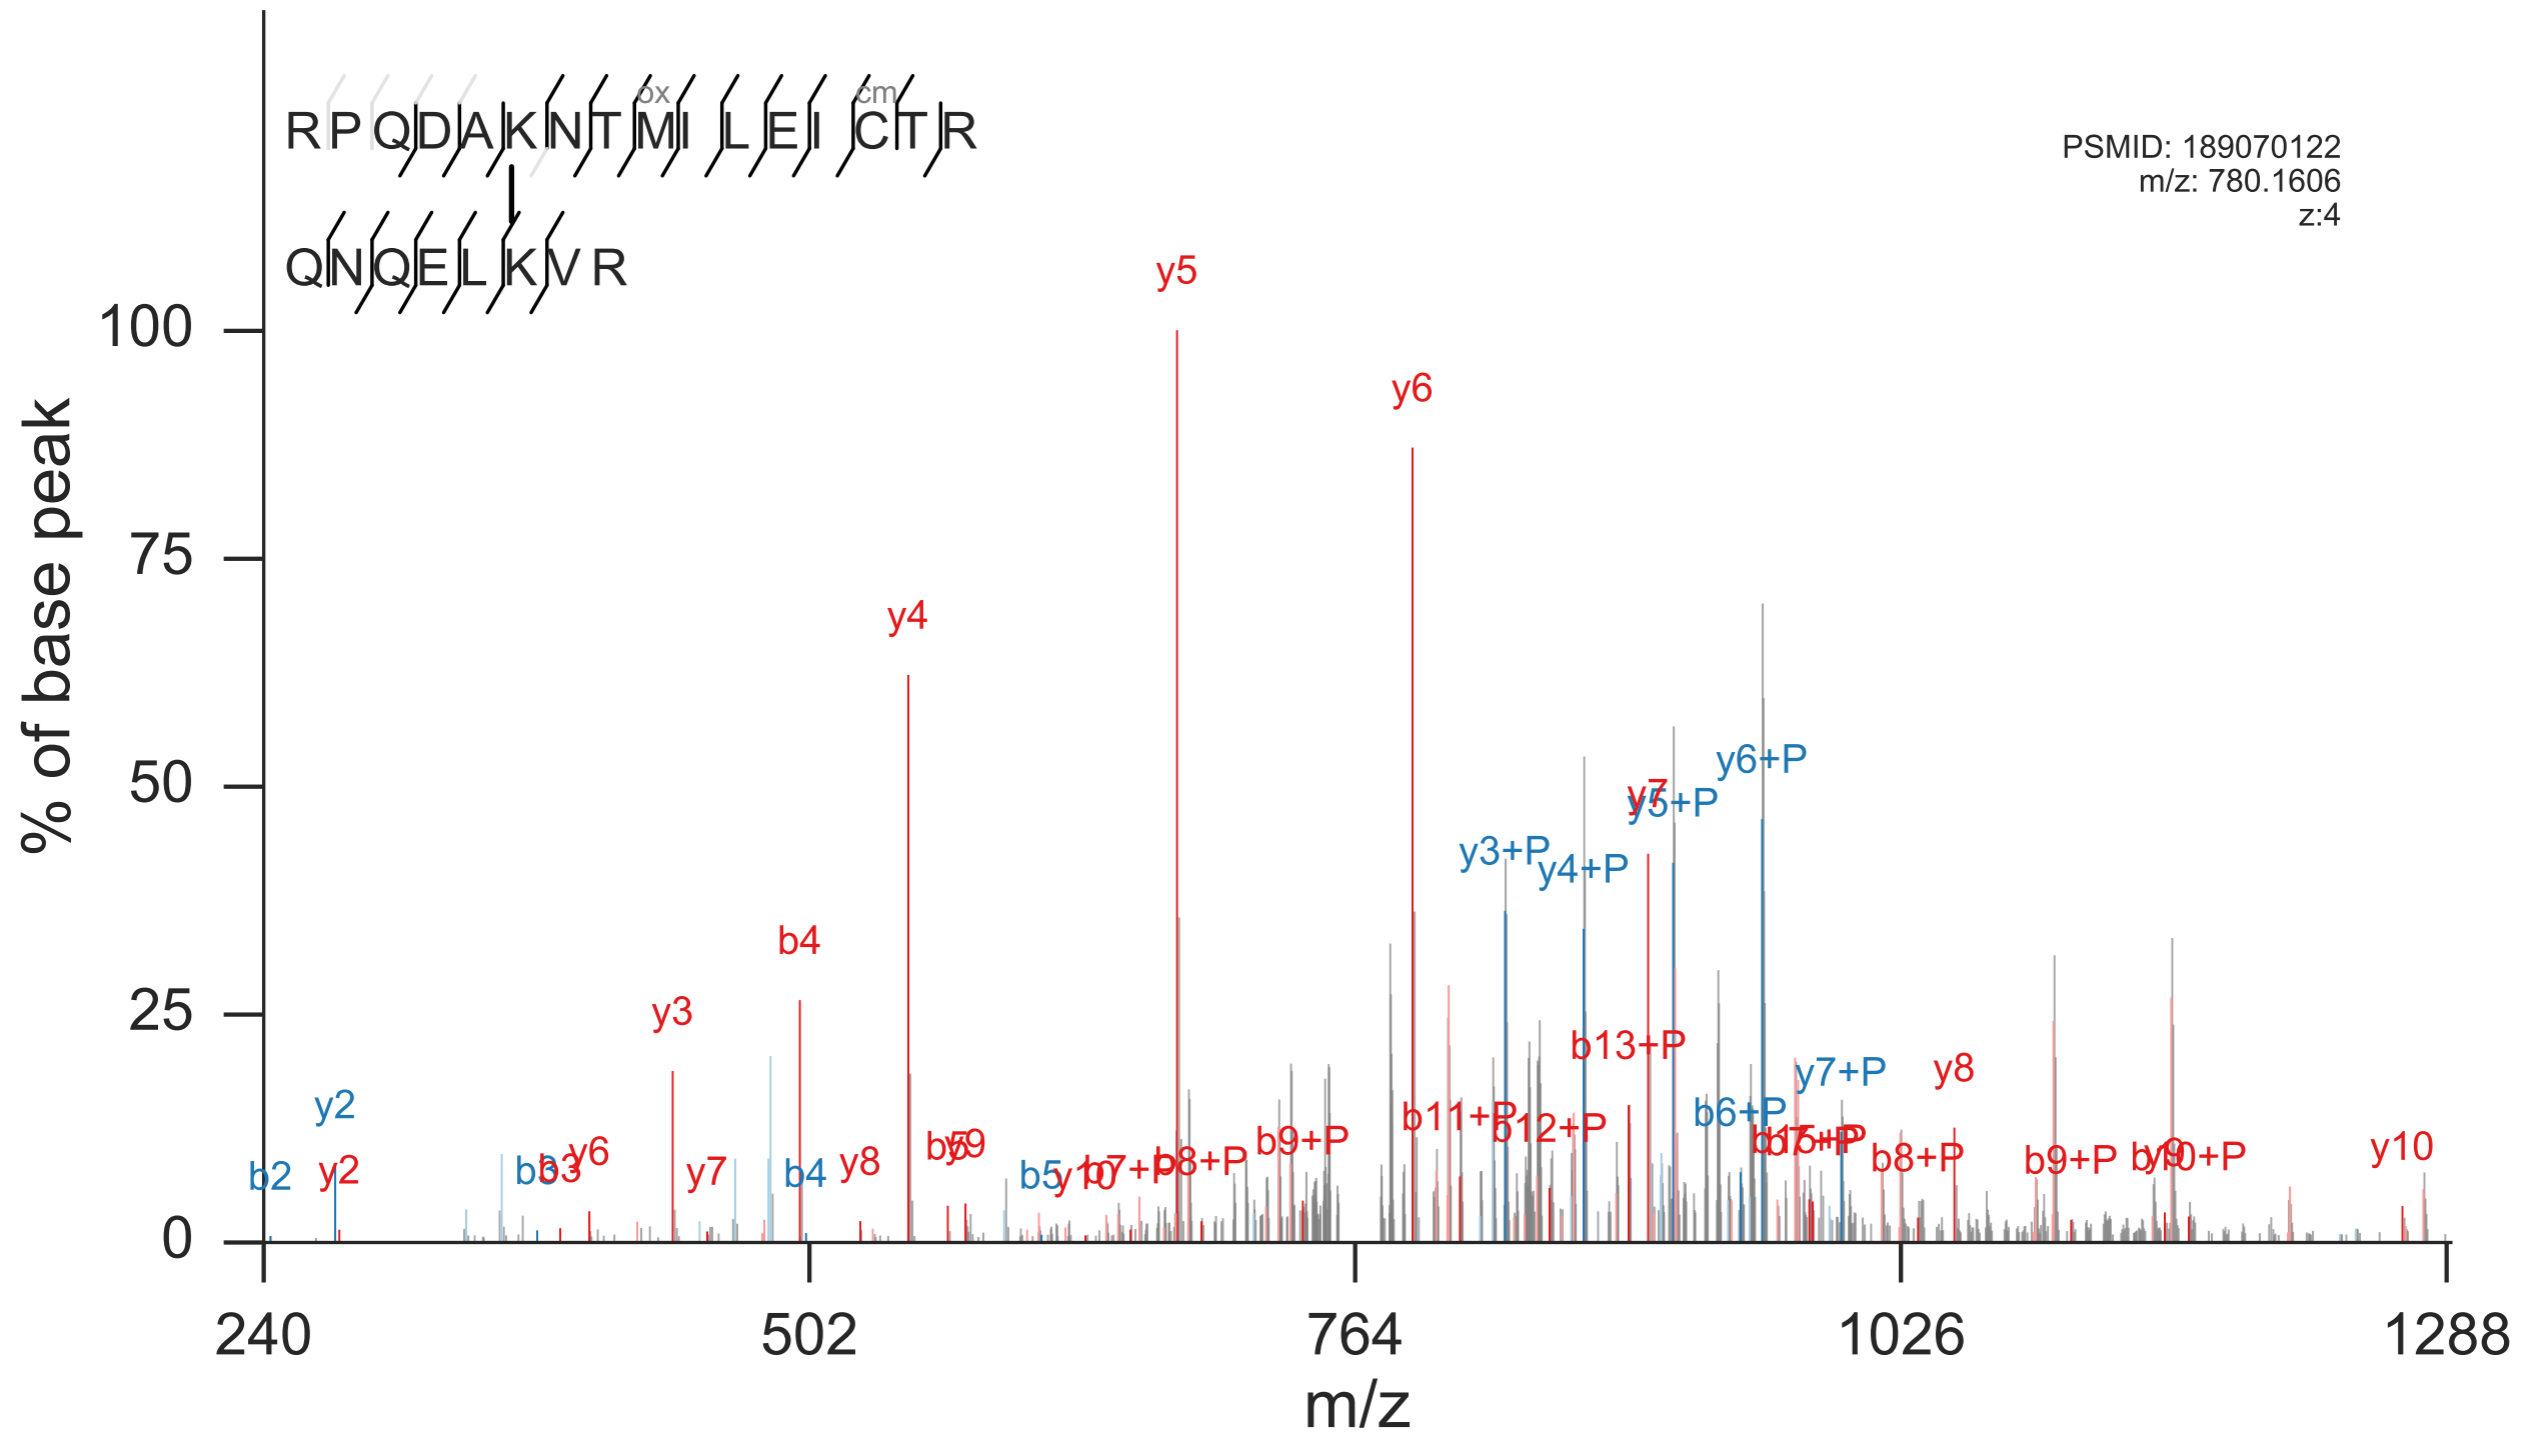

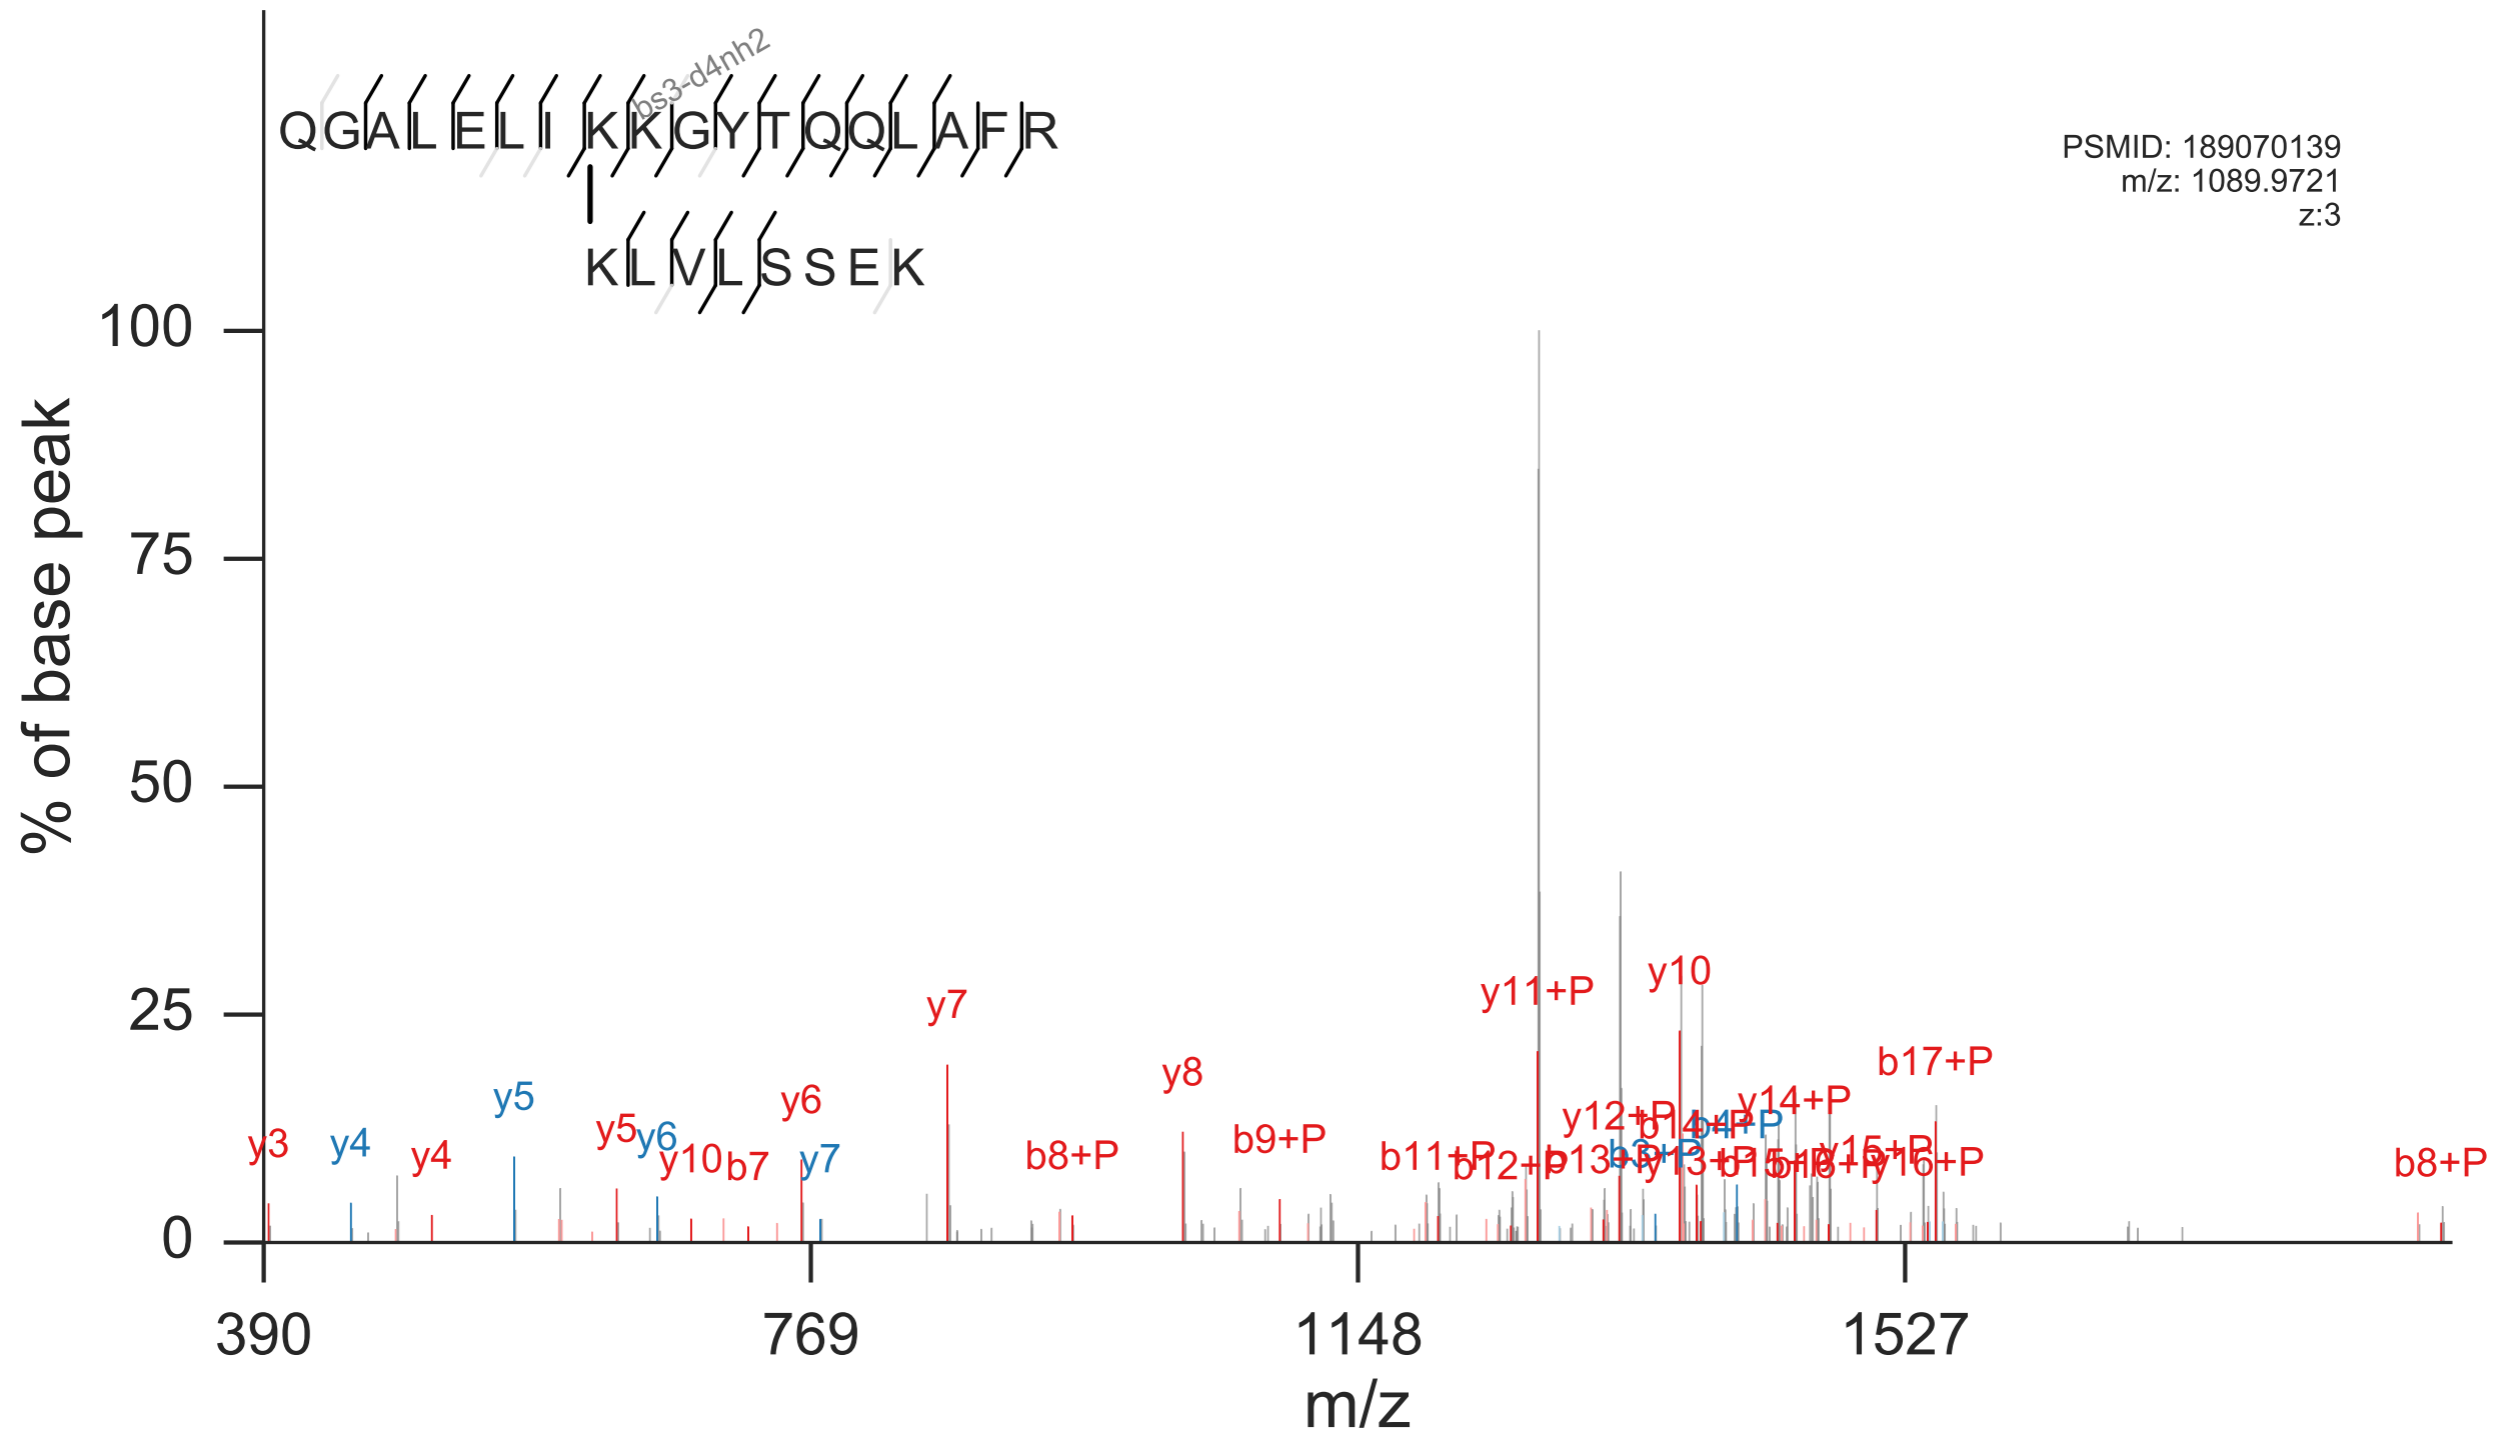

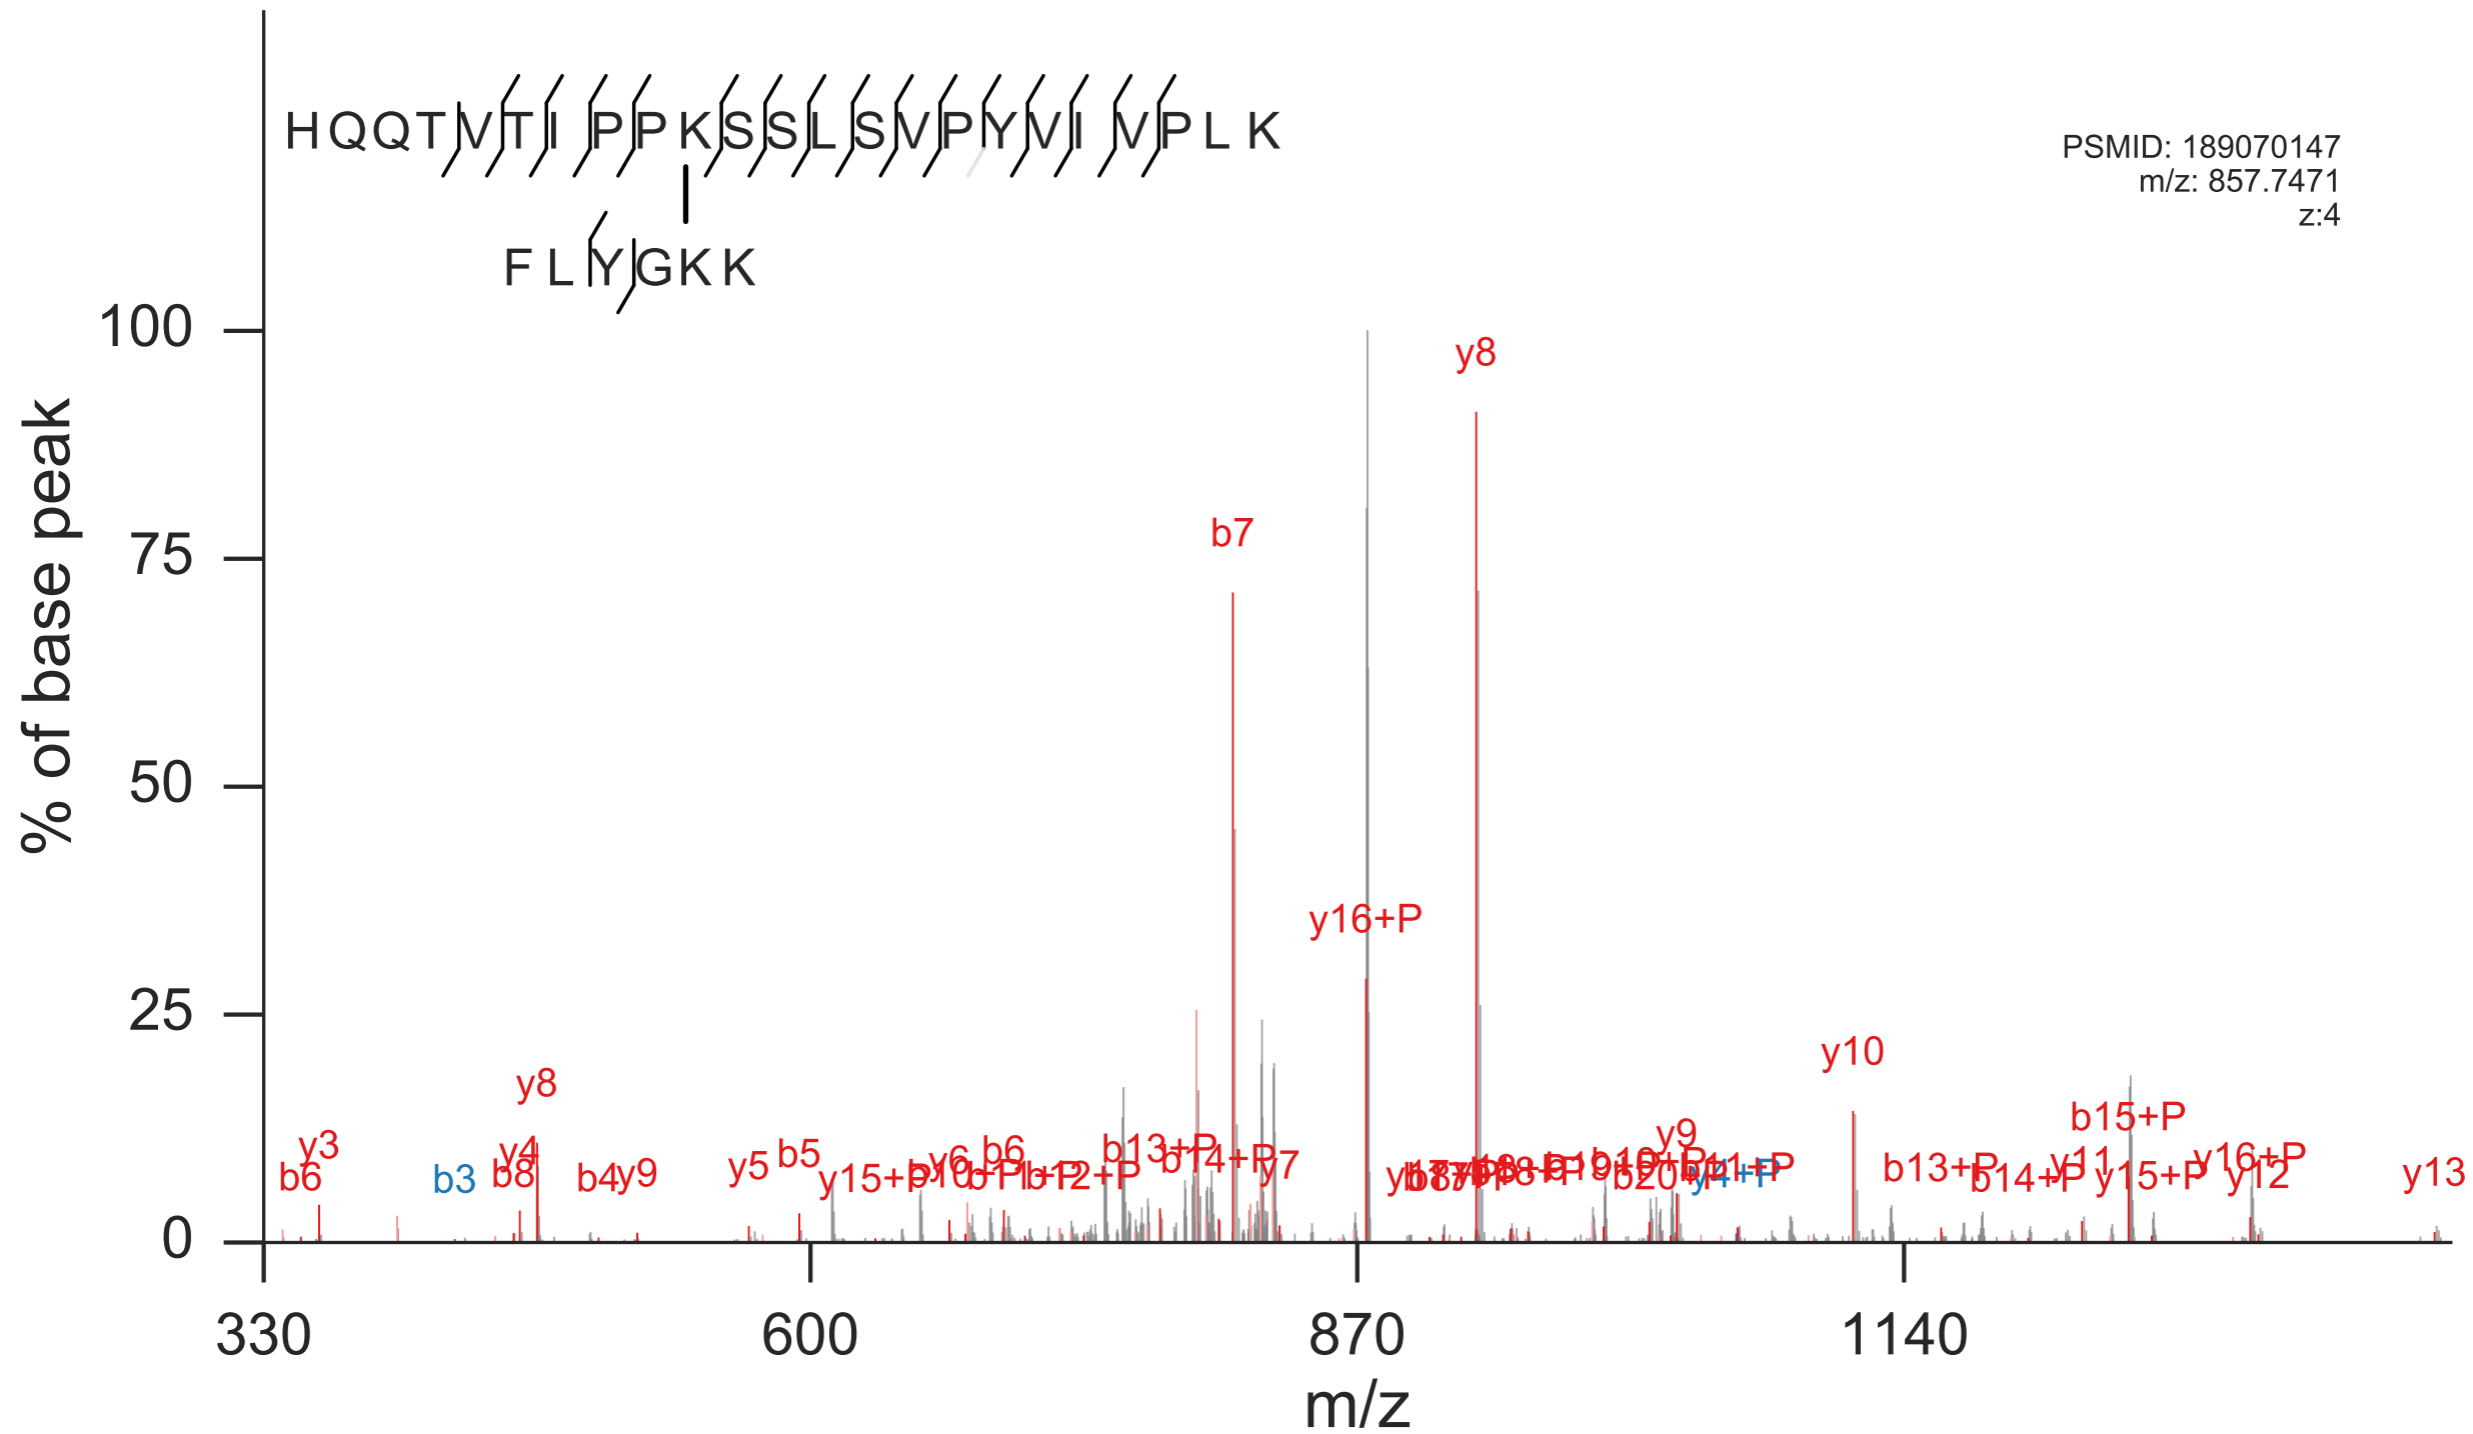



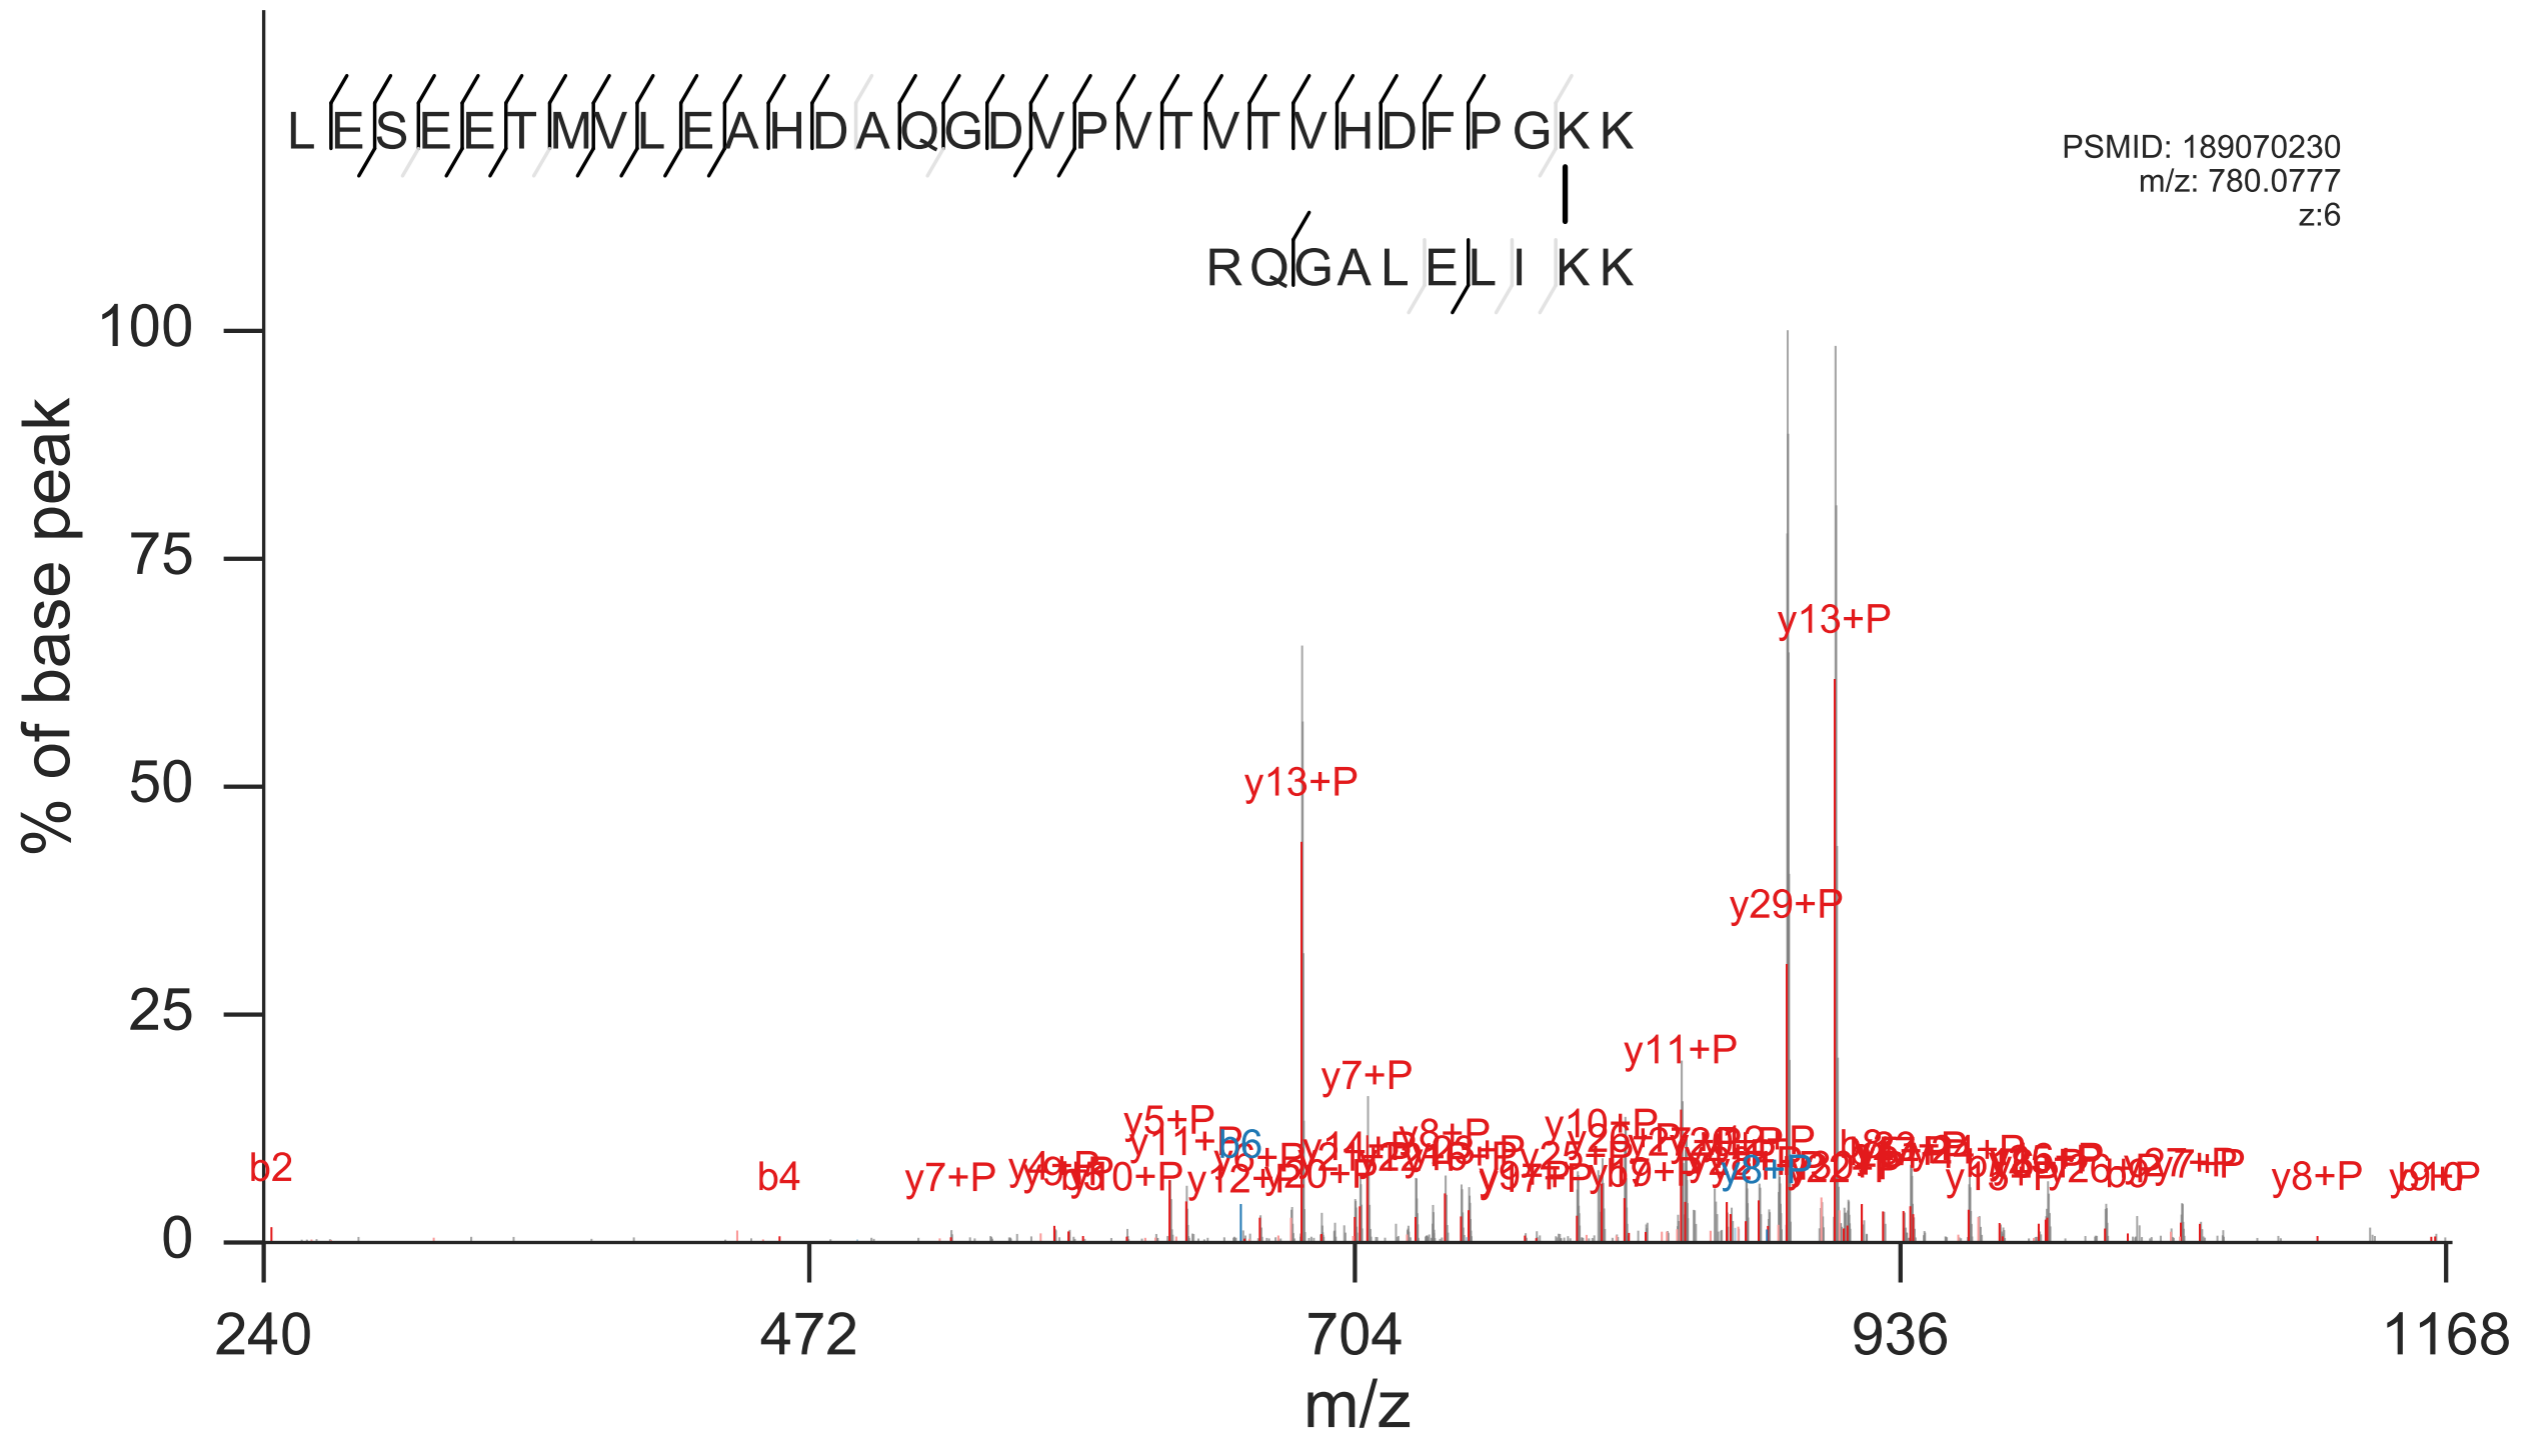

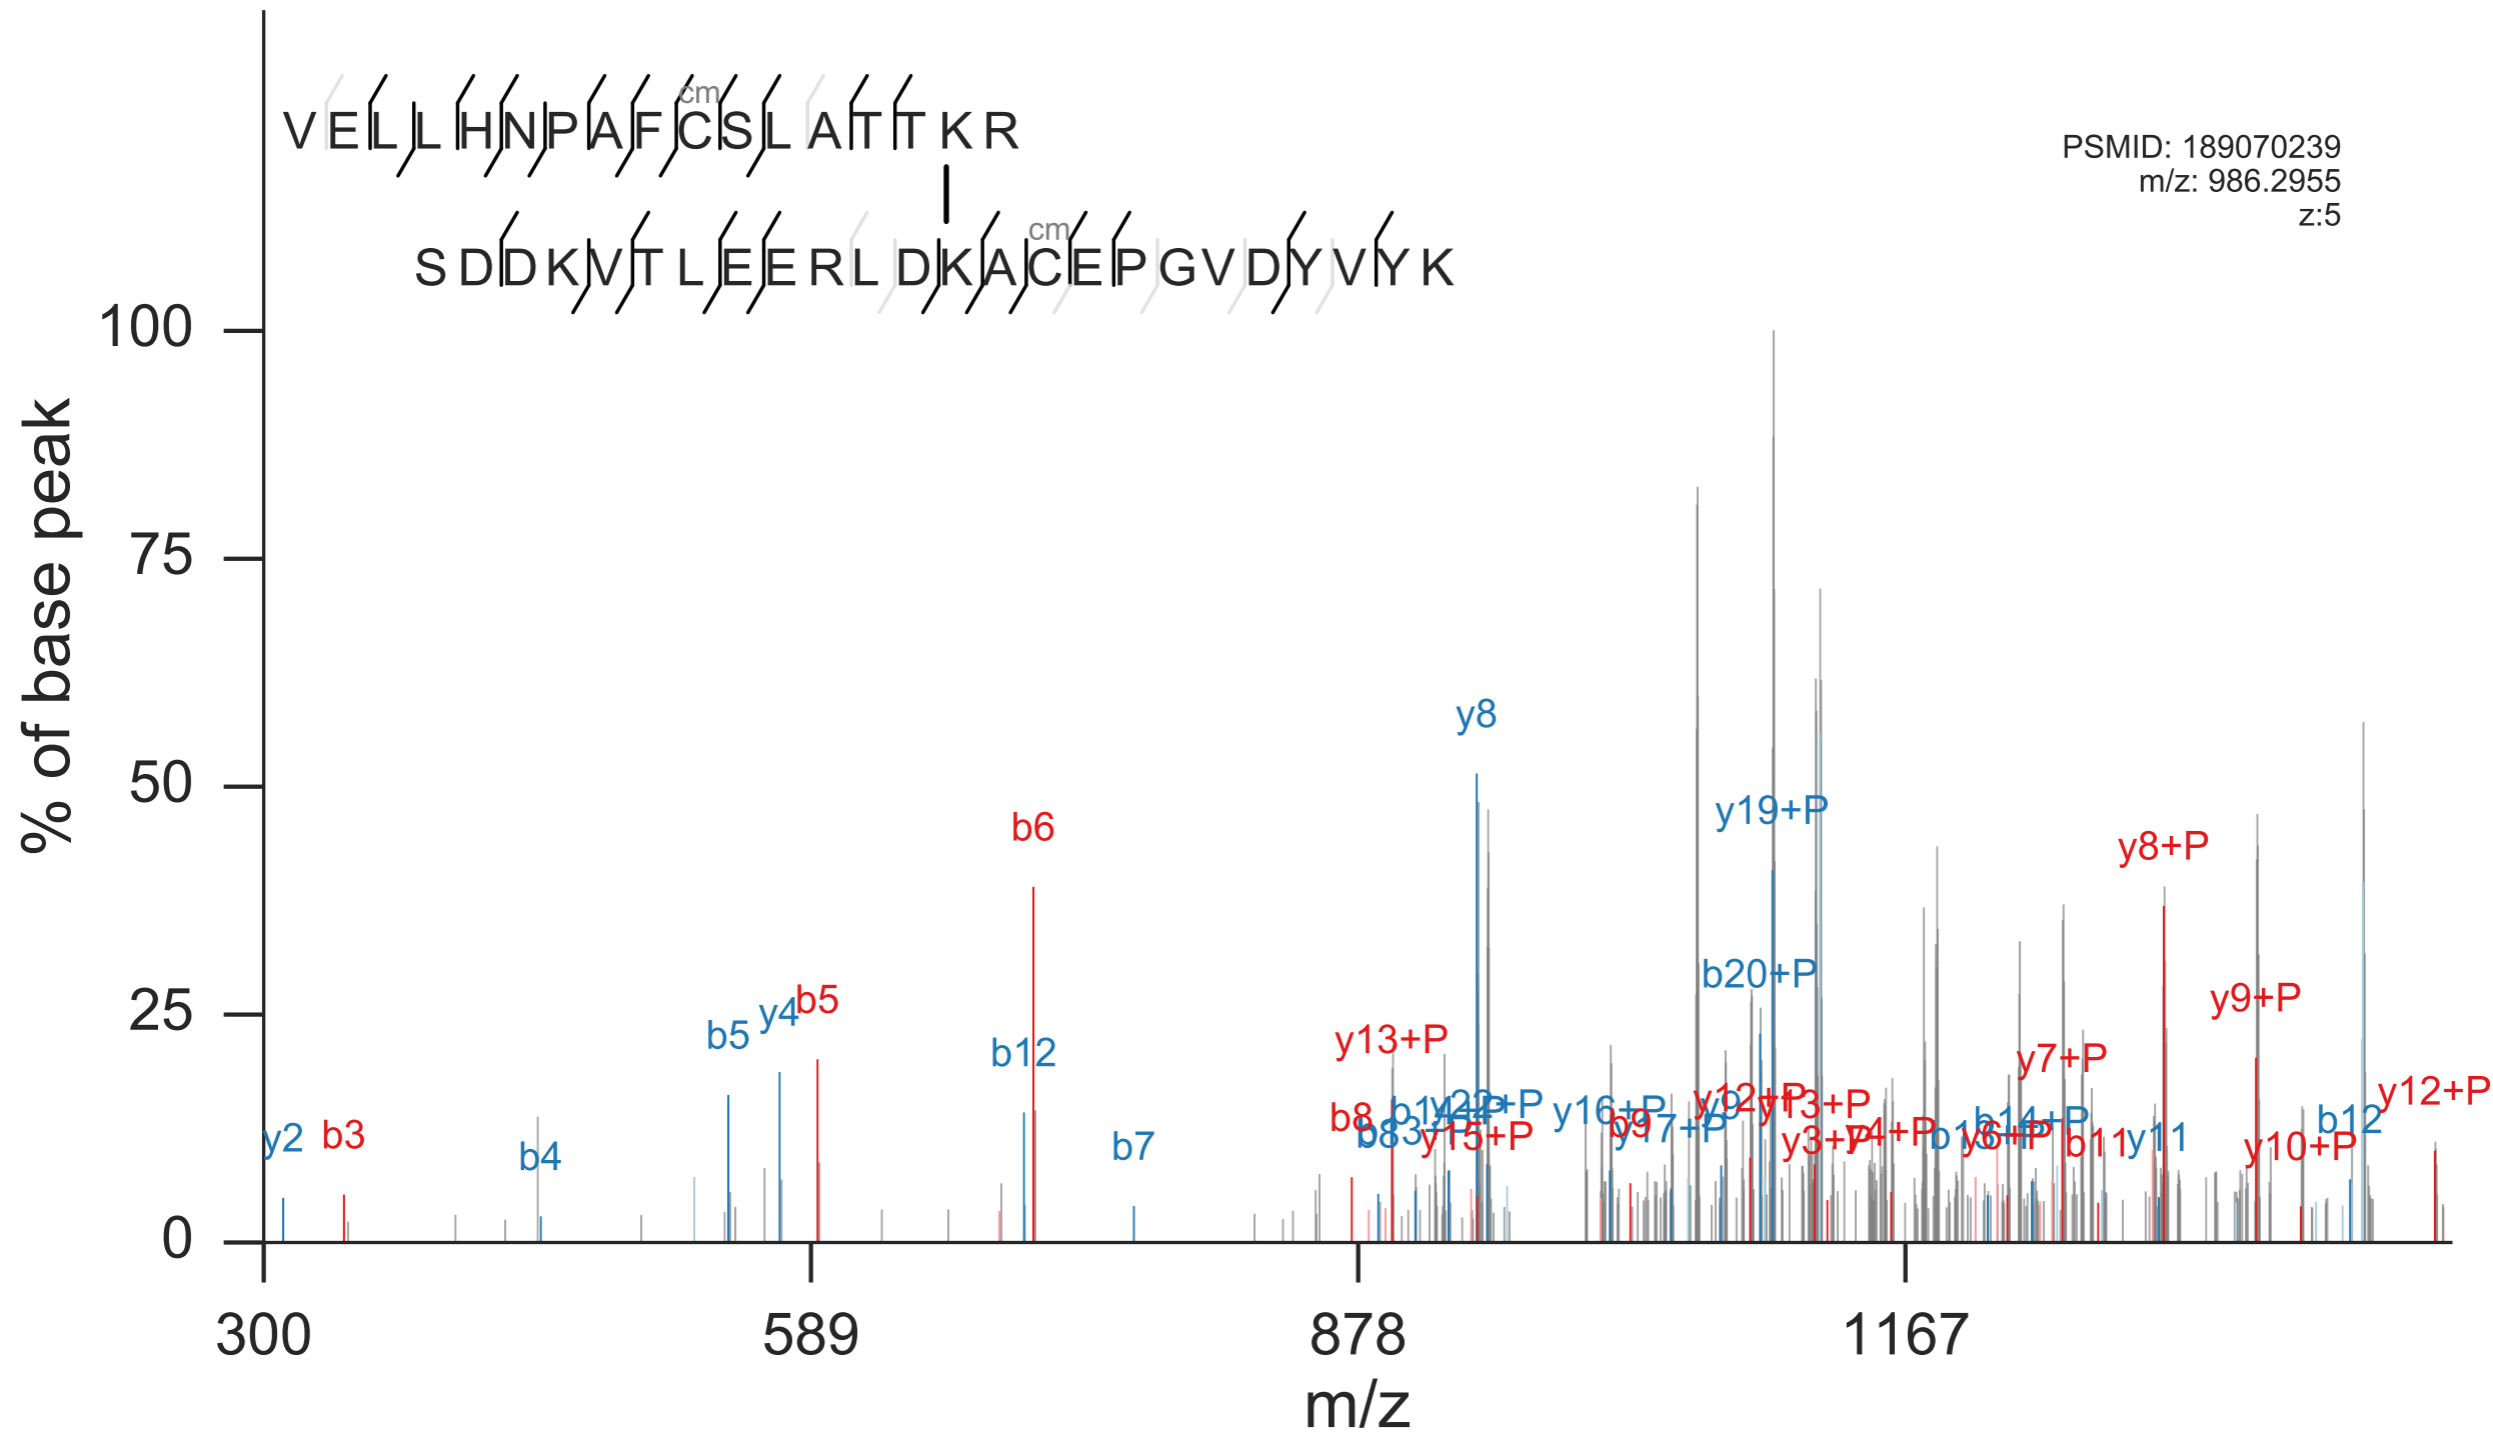

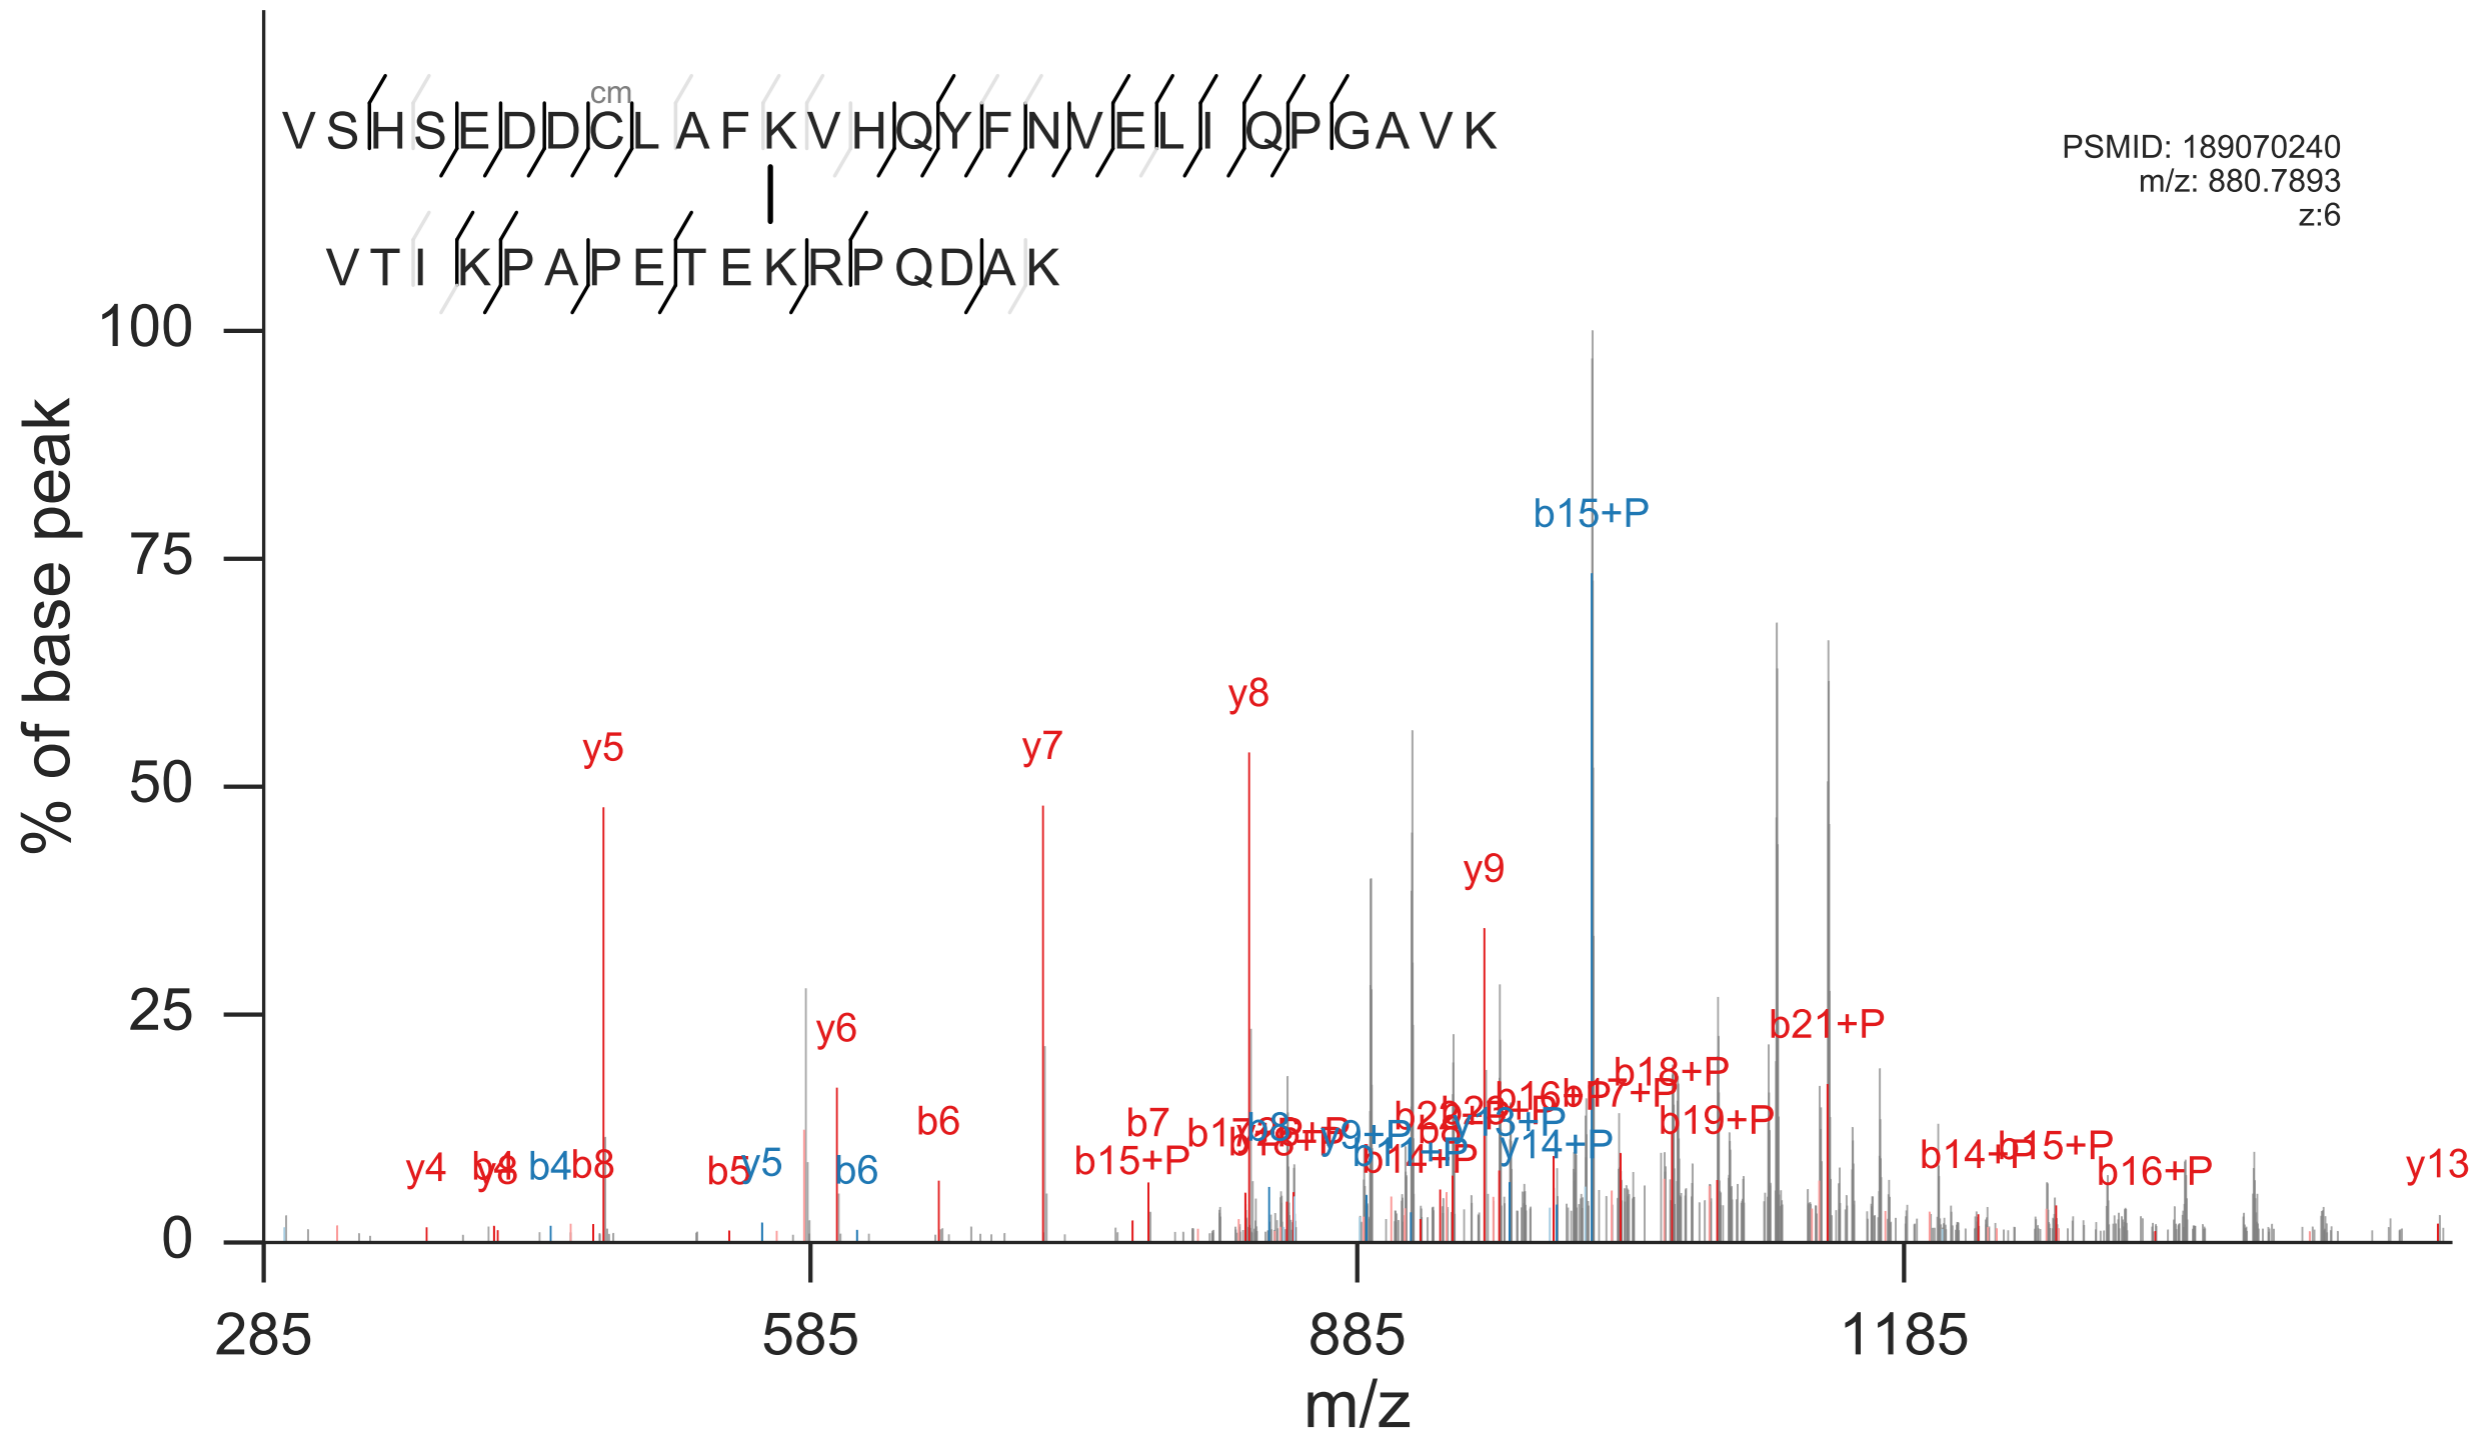

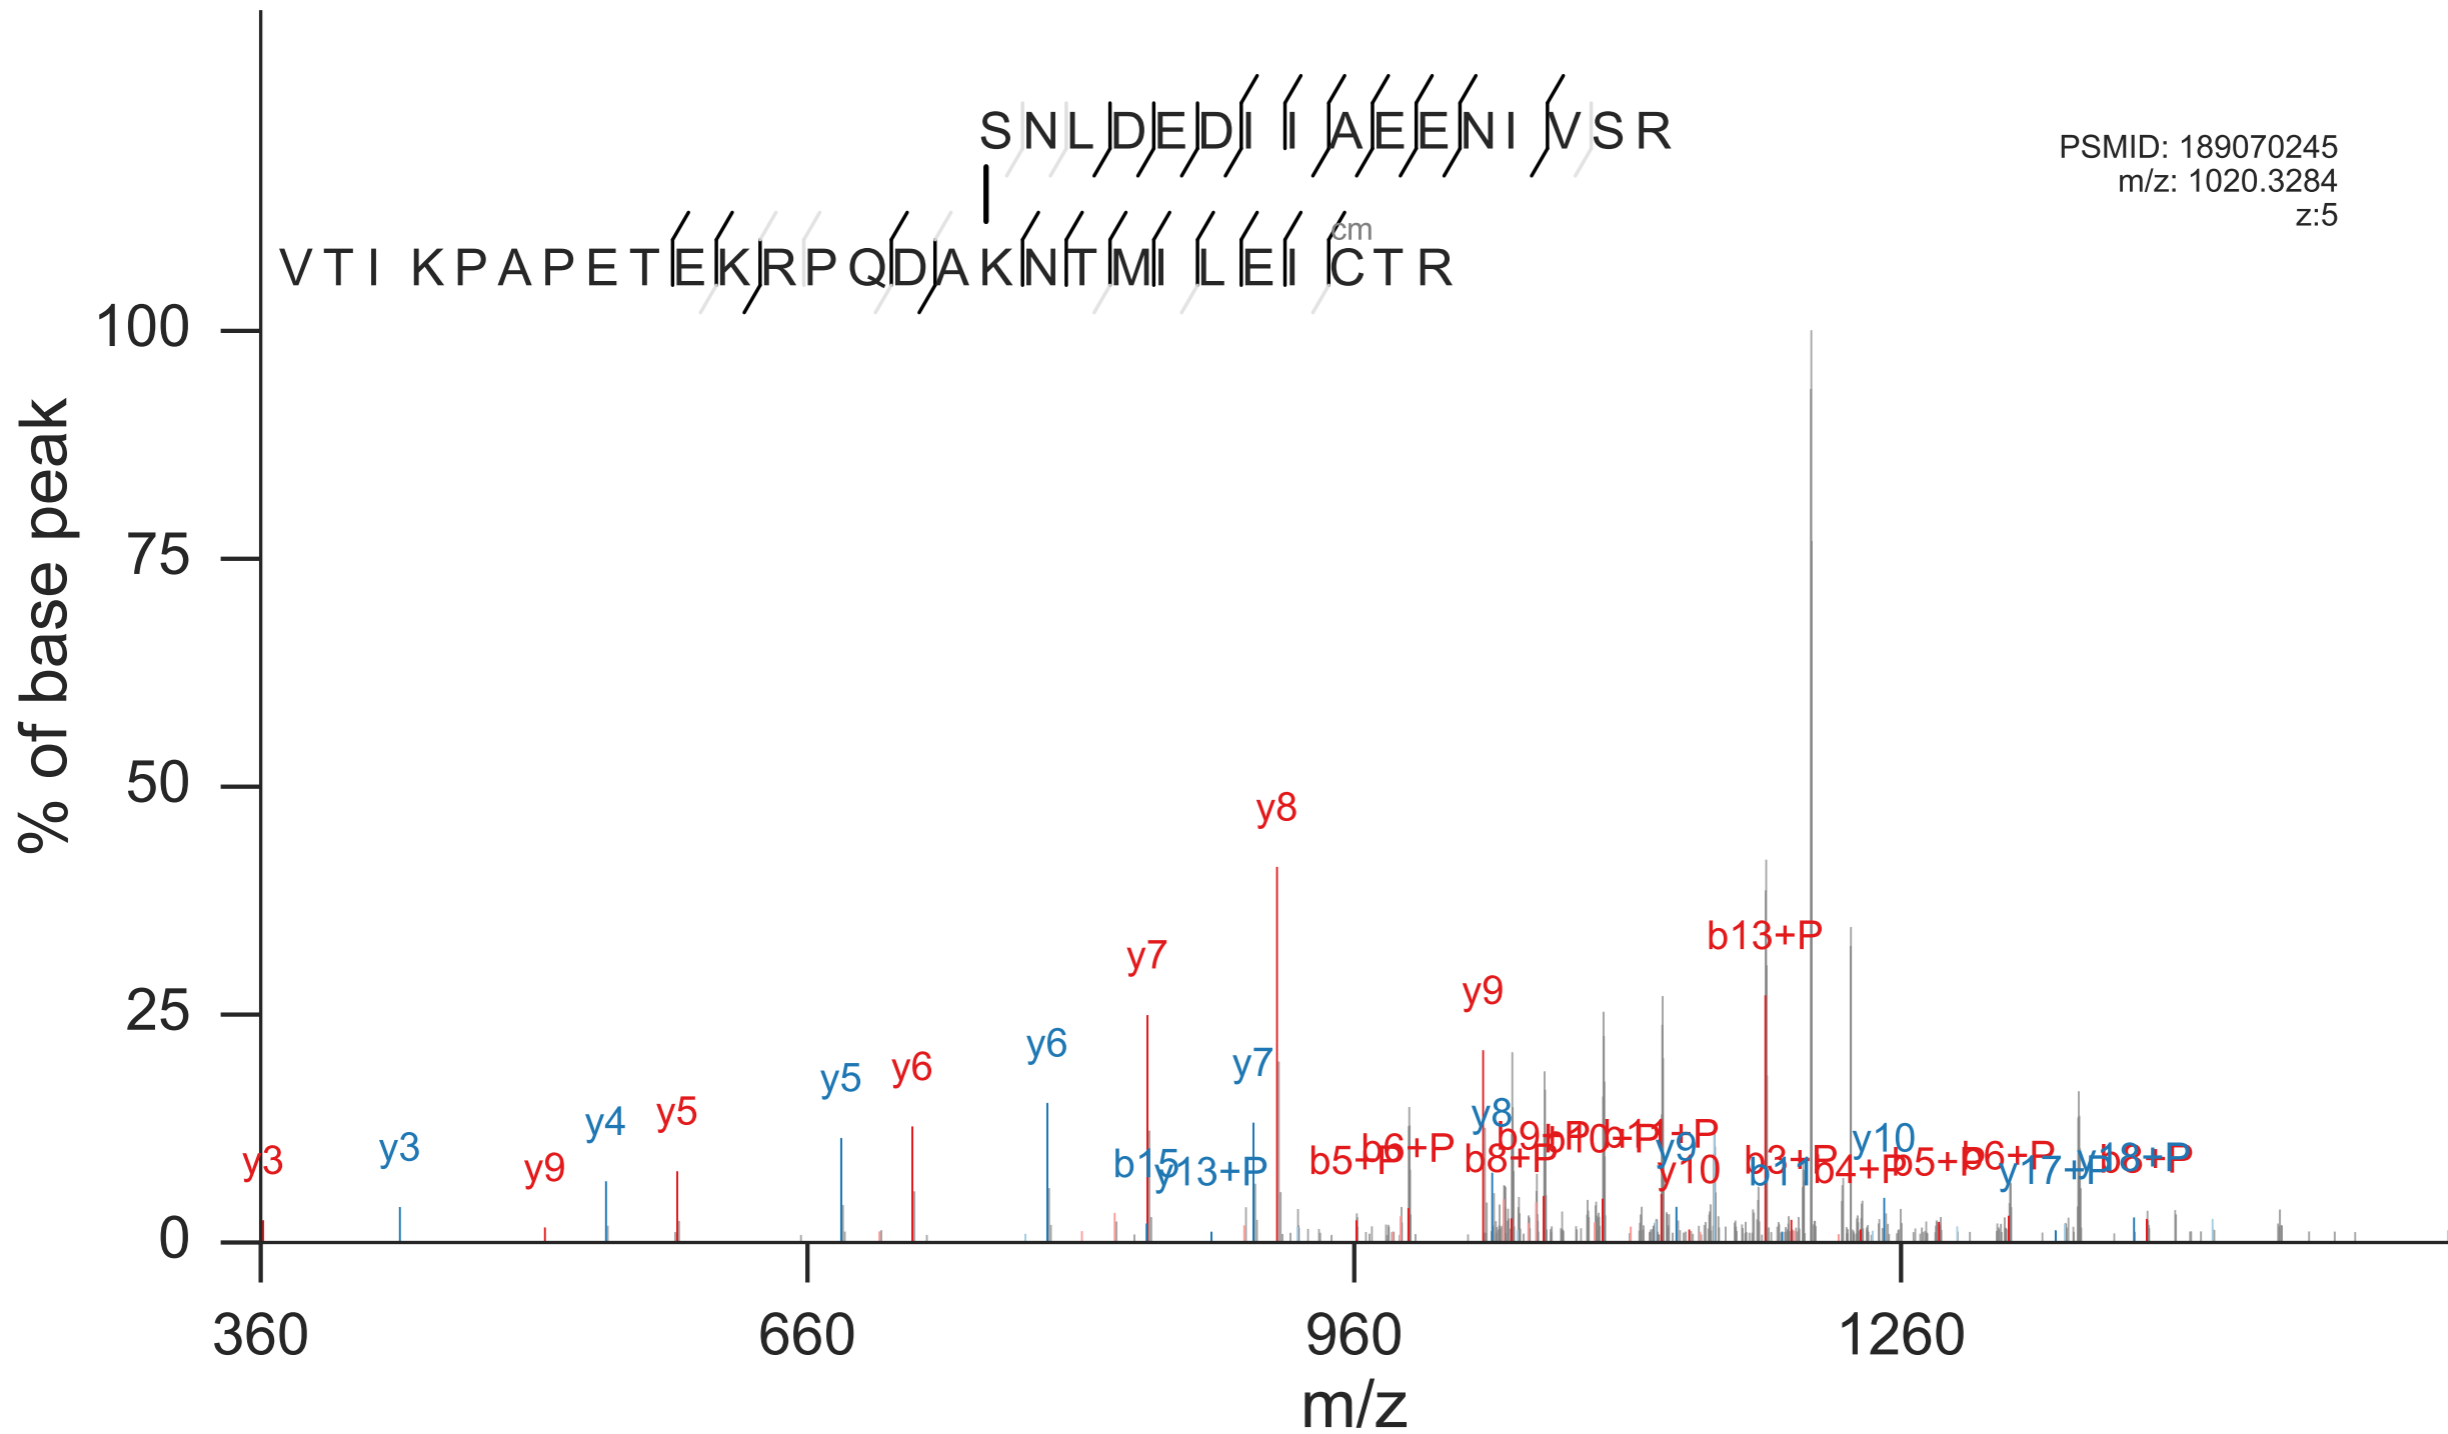

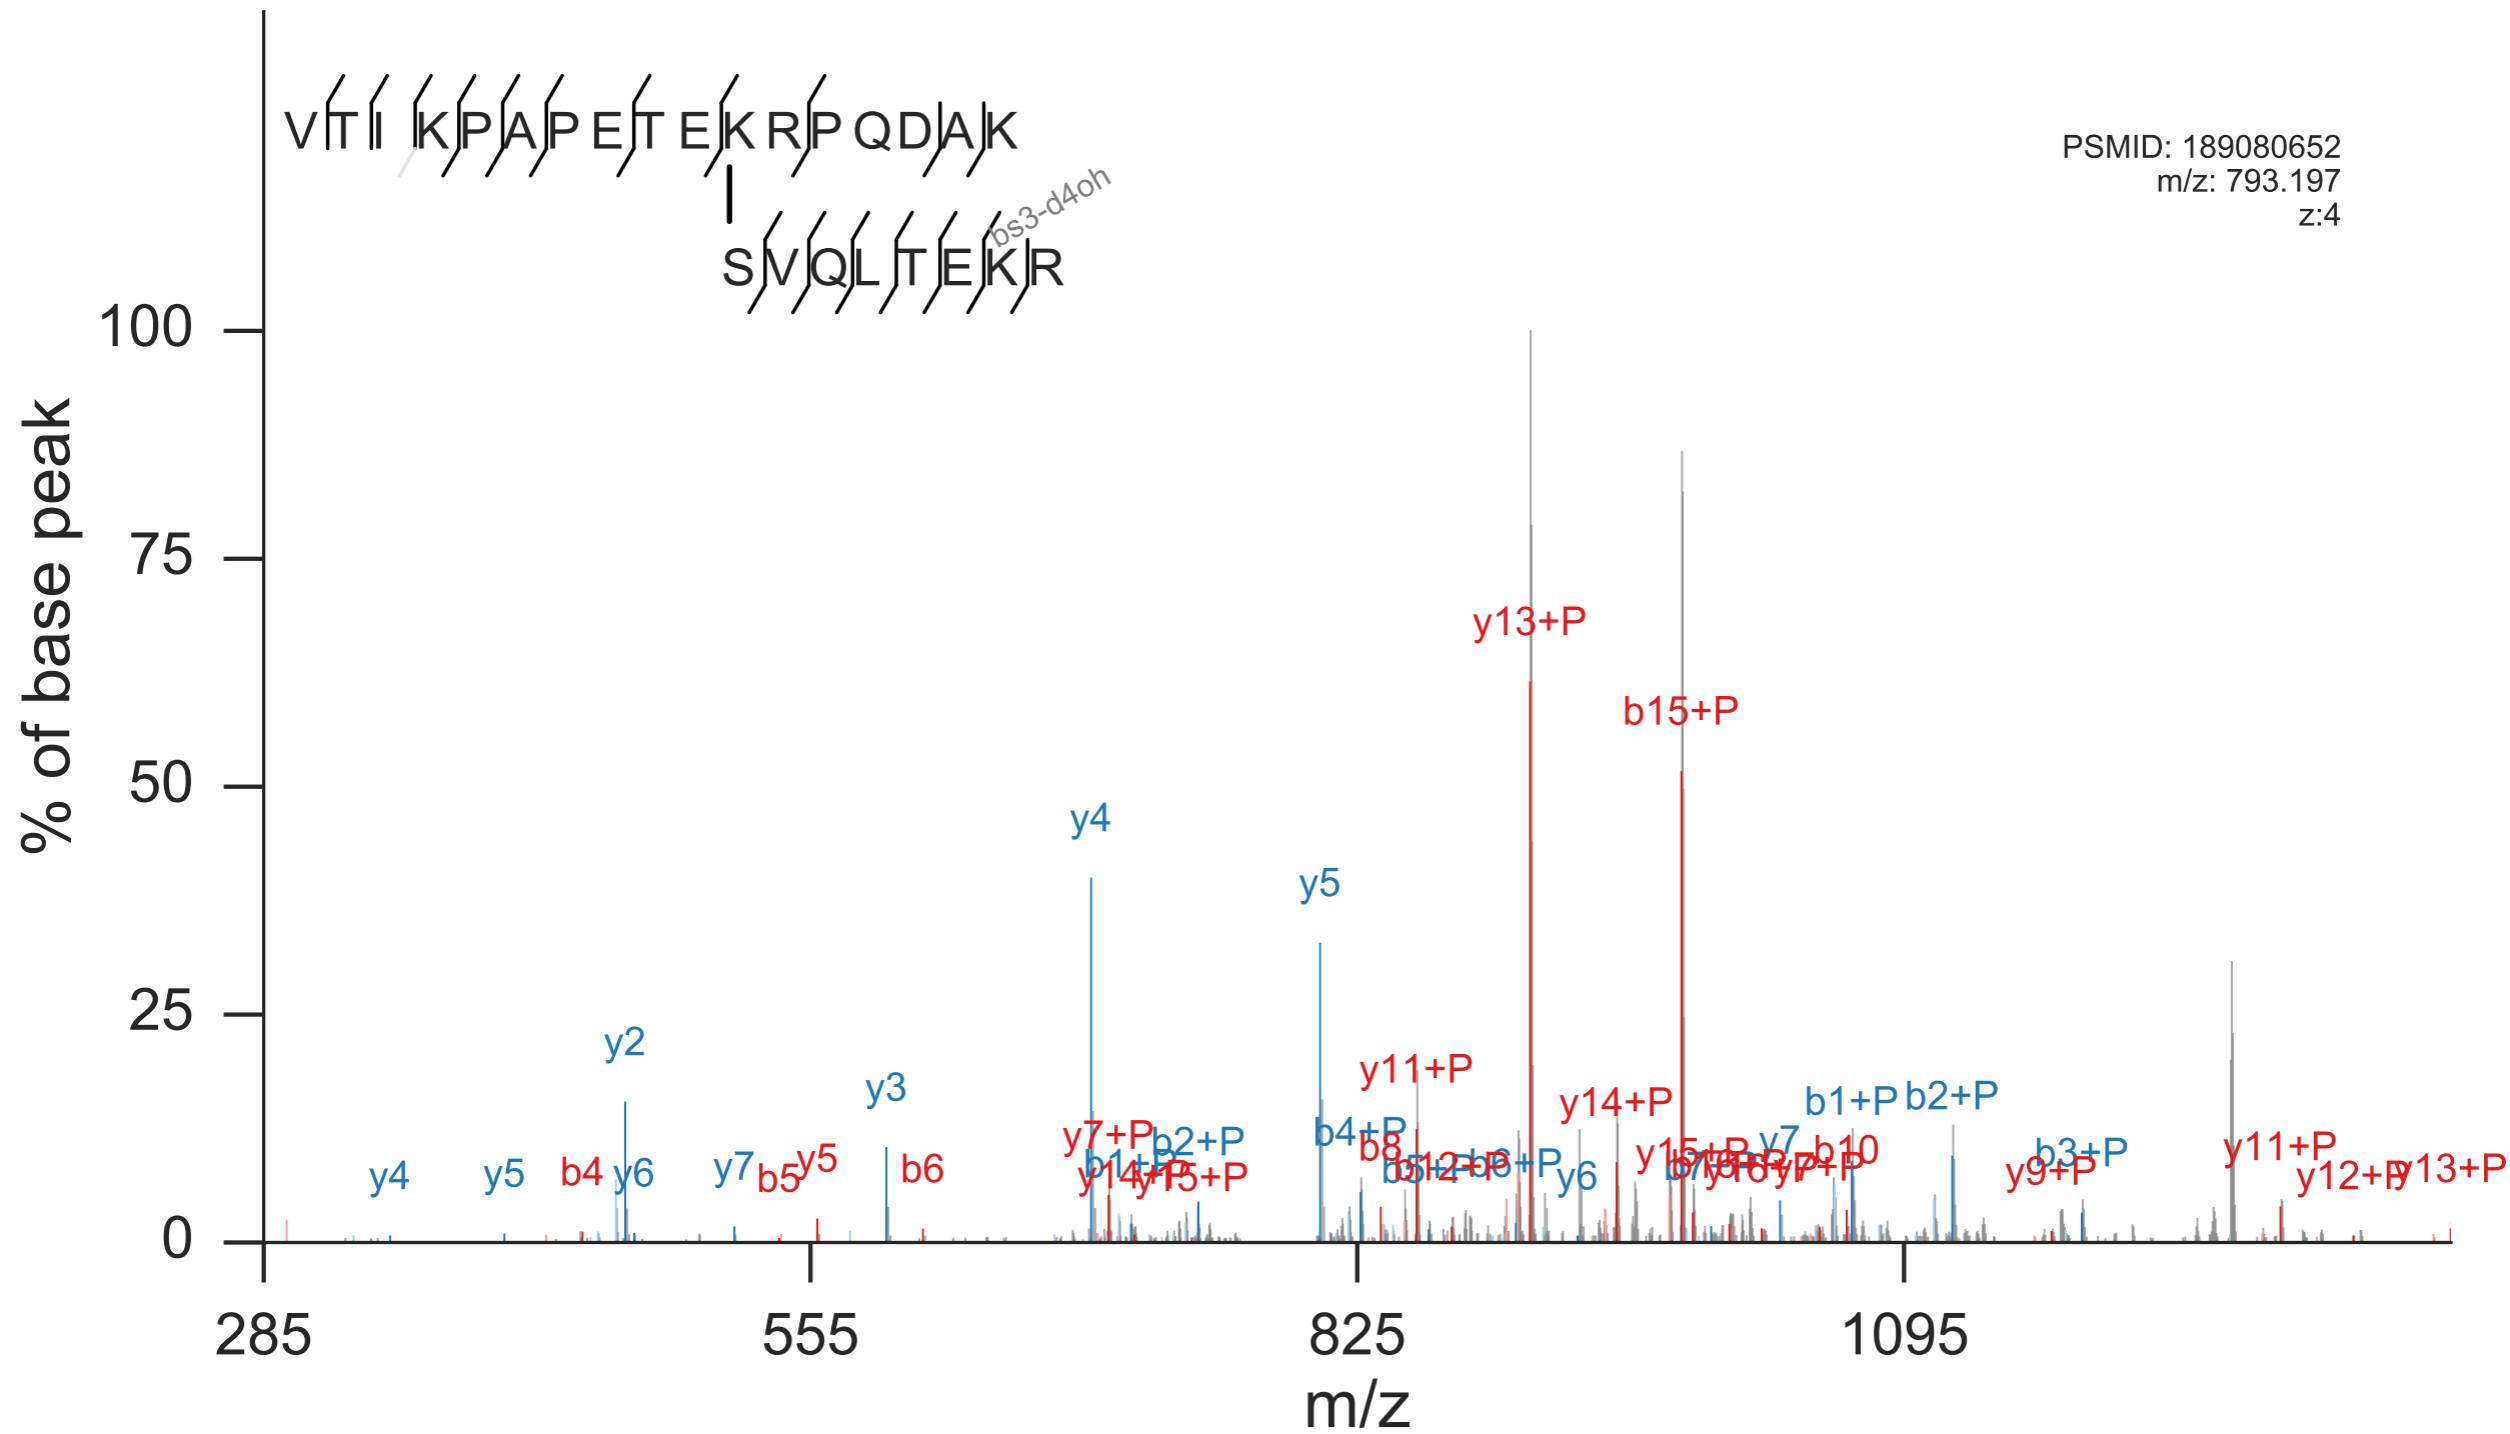

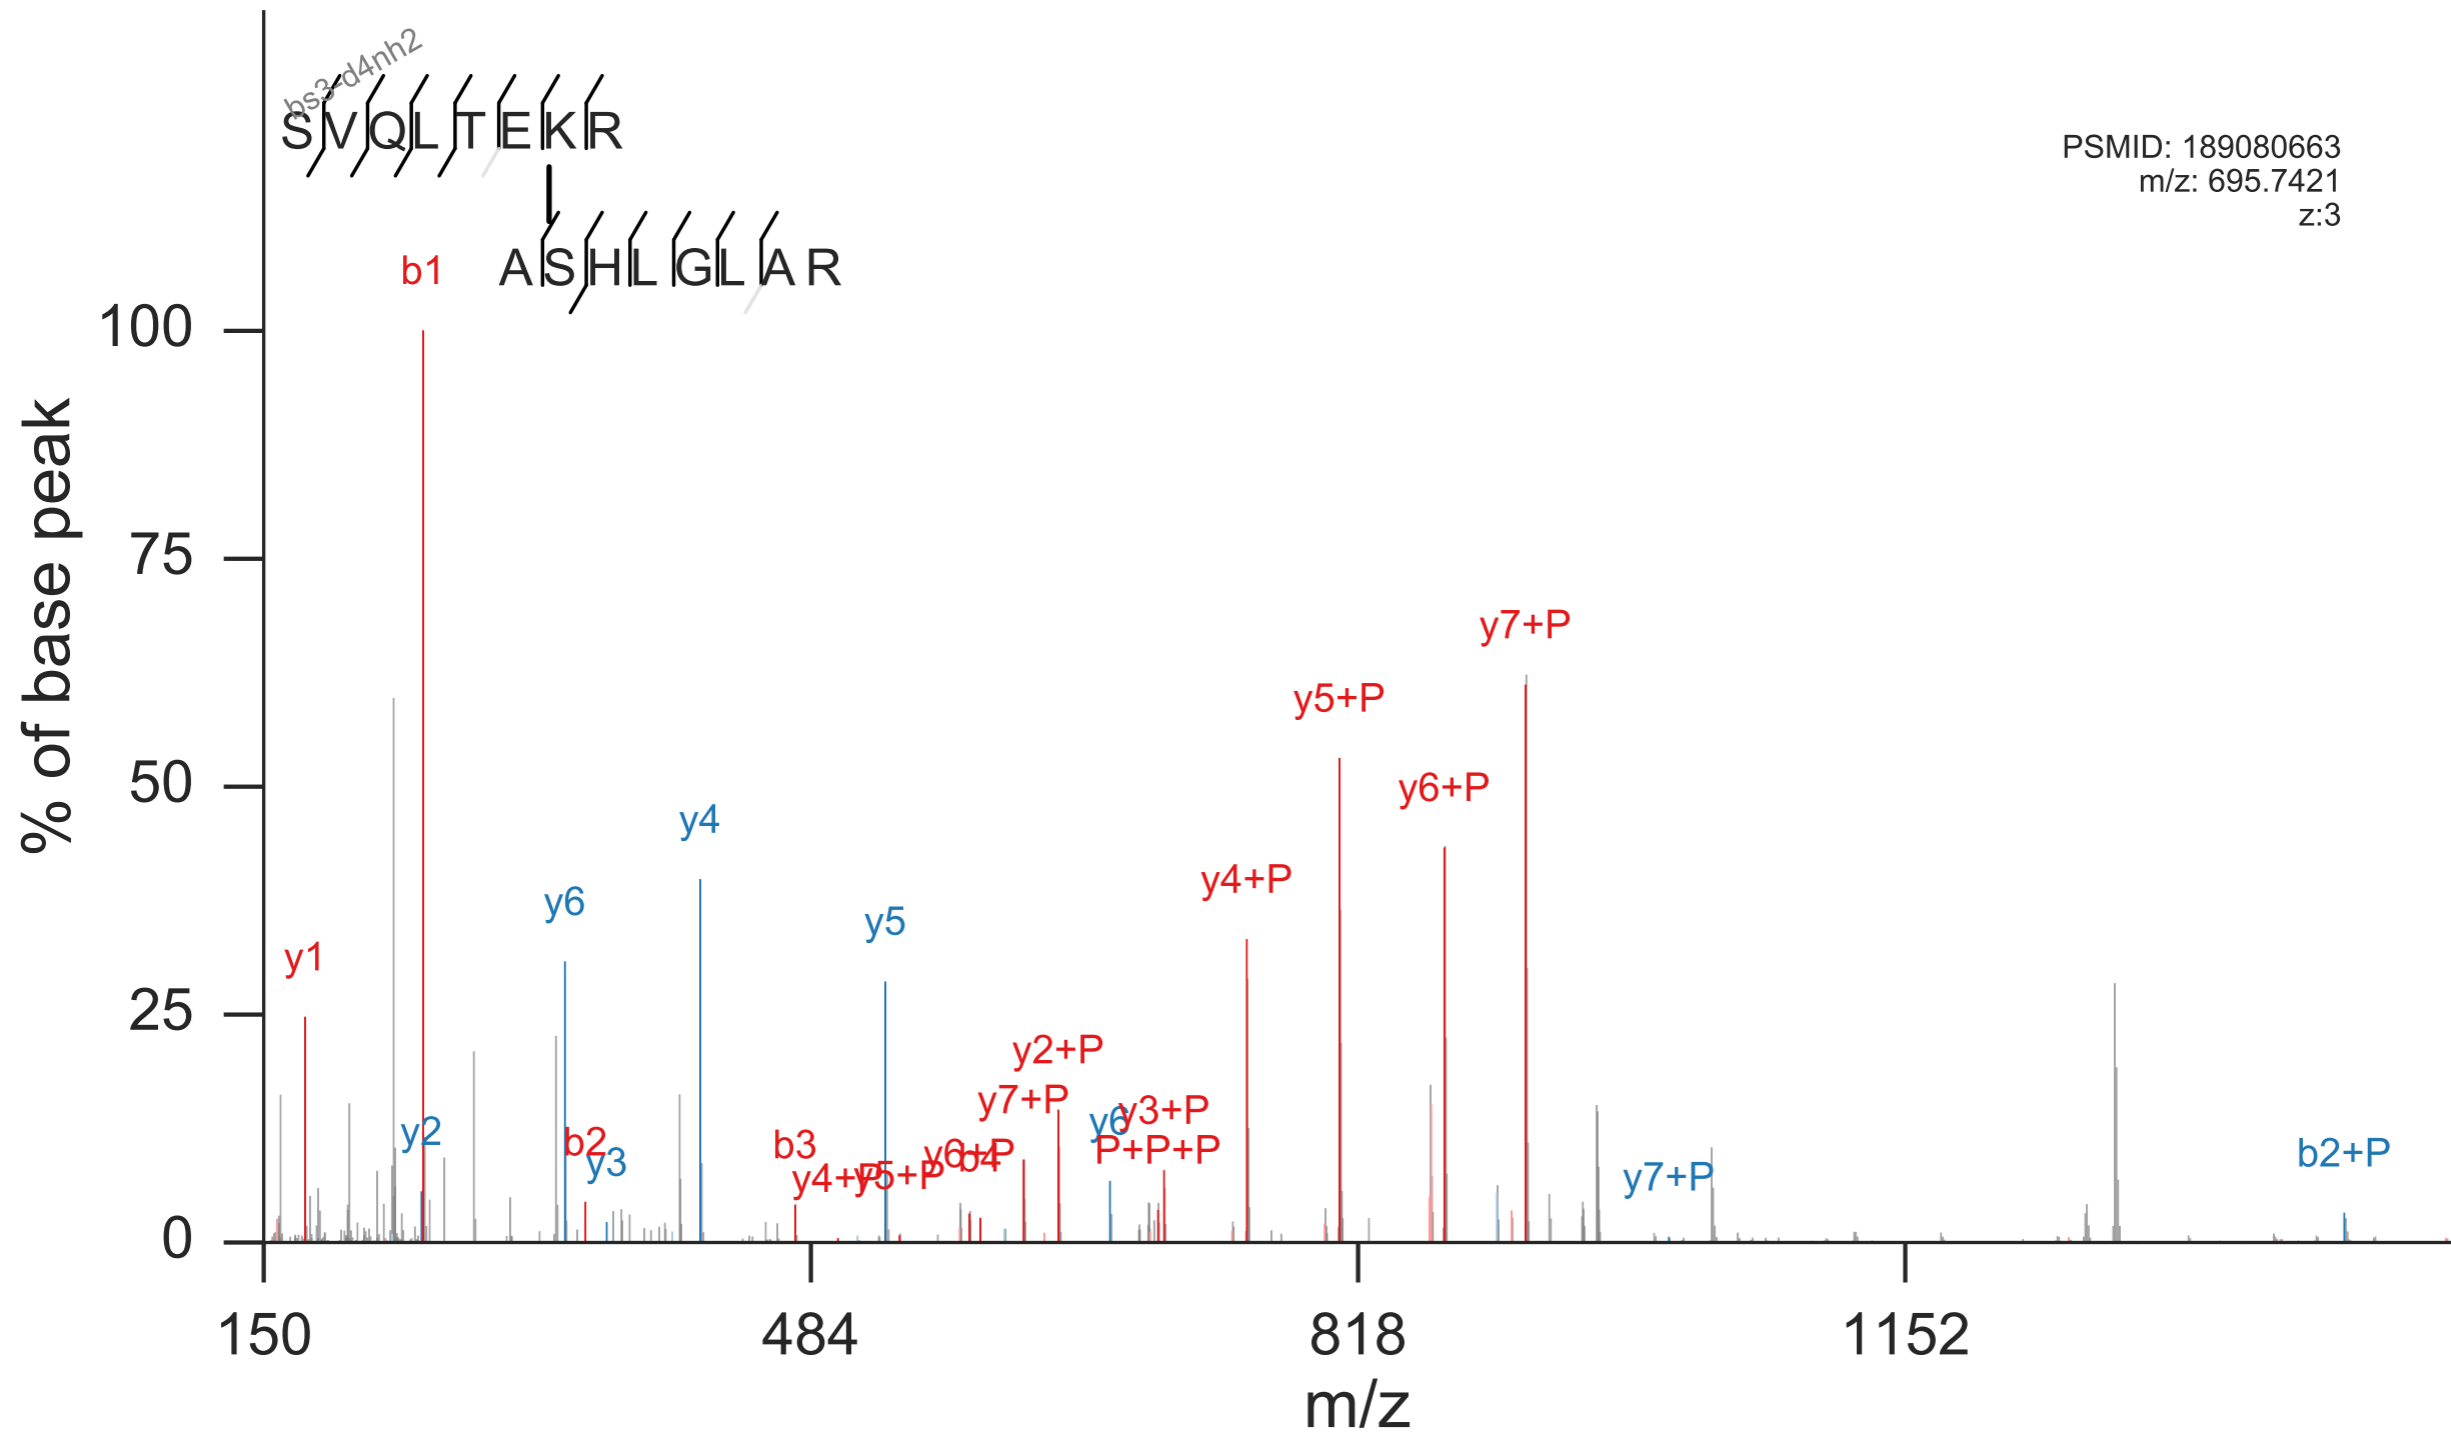

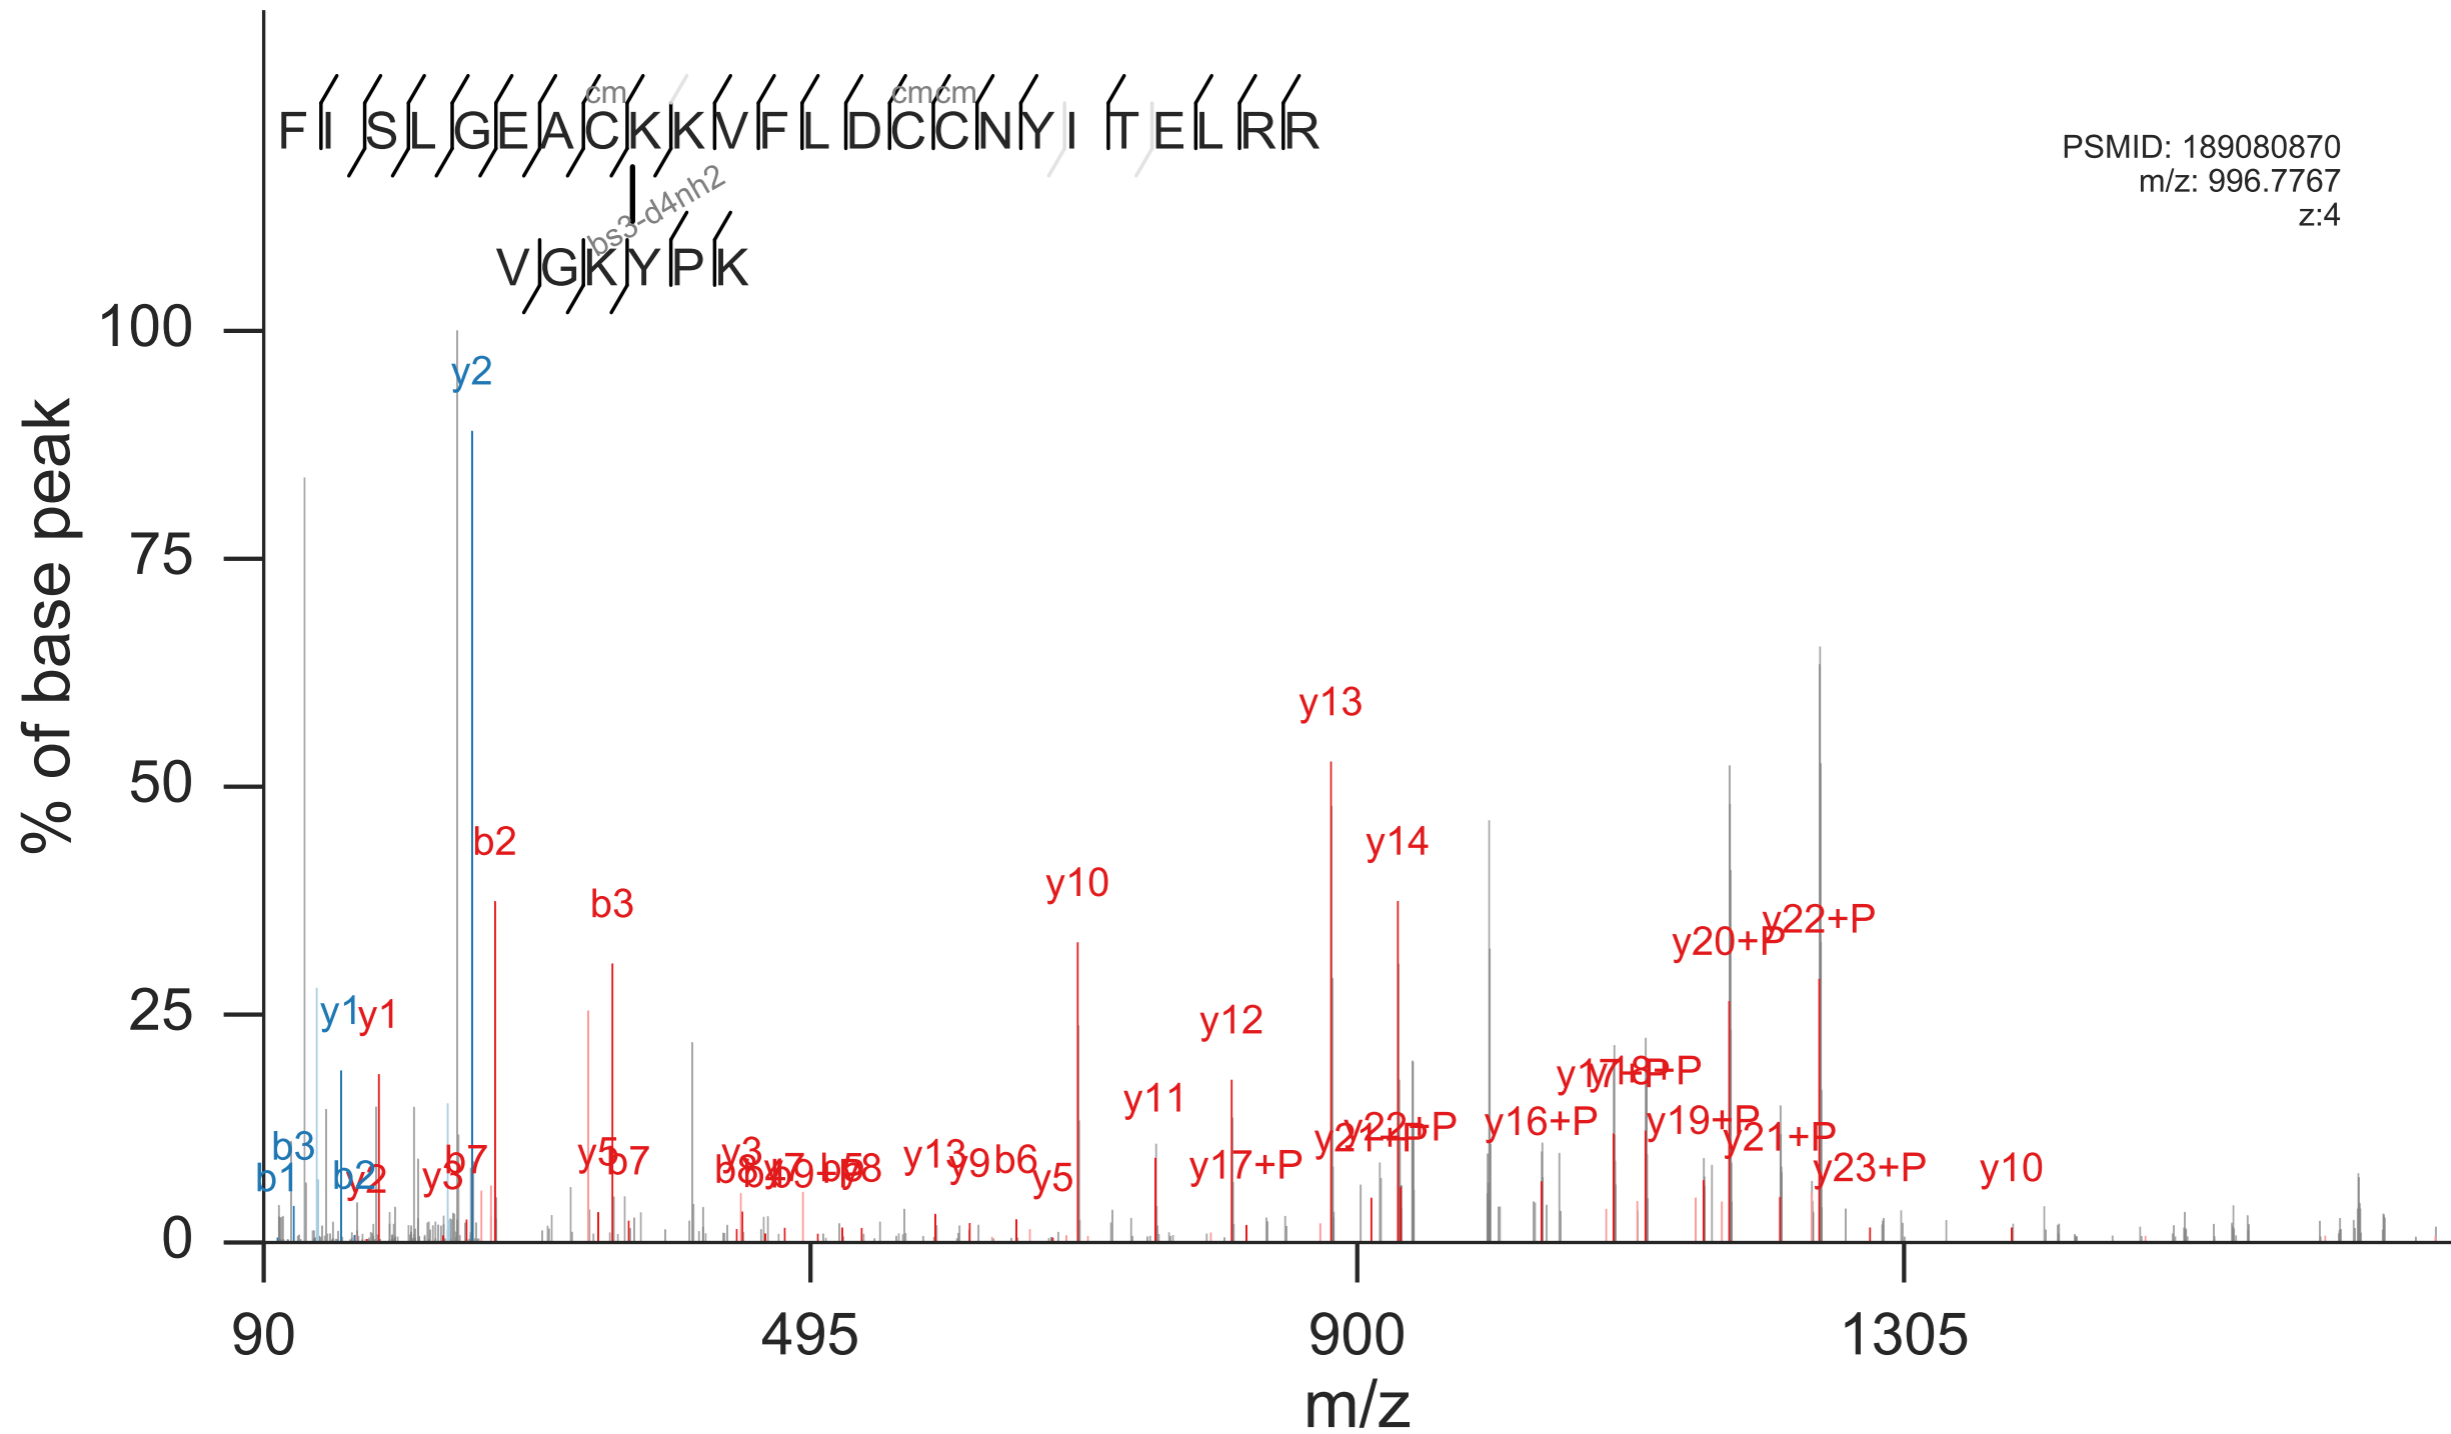

F I S L G E A C K K M F L D C C N Y I T E L R R

V J G K Y P K

cm cm cm

bs3-d4nh2

PSMID: 189080870  
 m/z: 996.7767  
 z:4

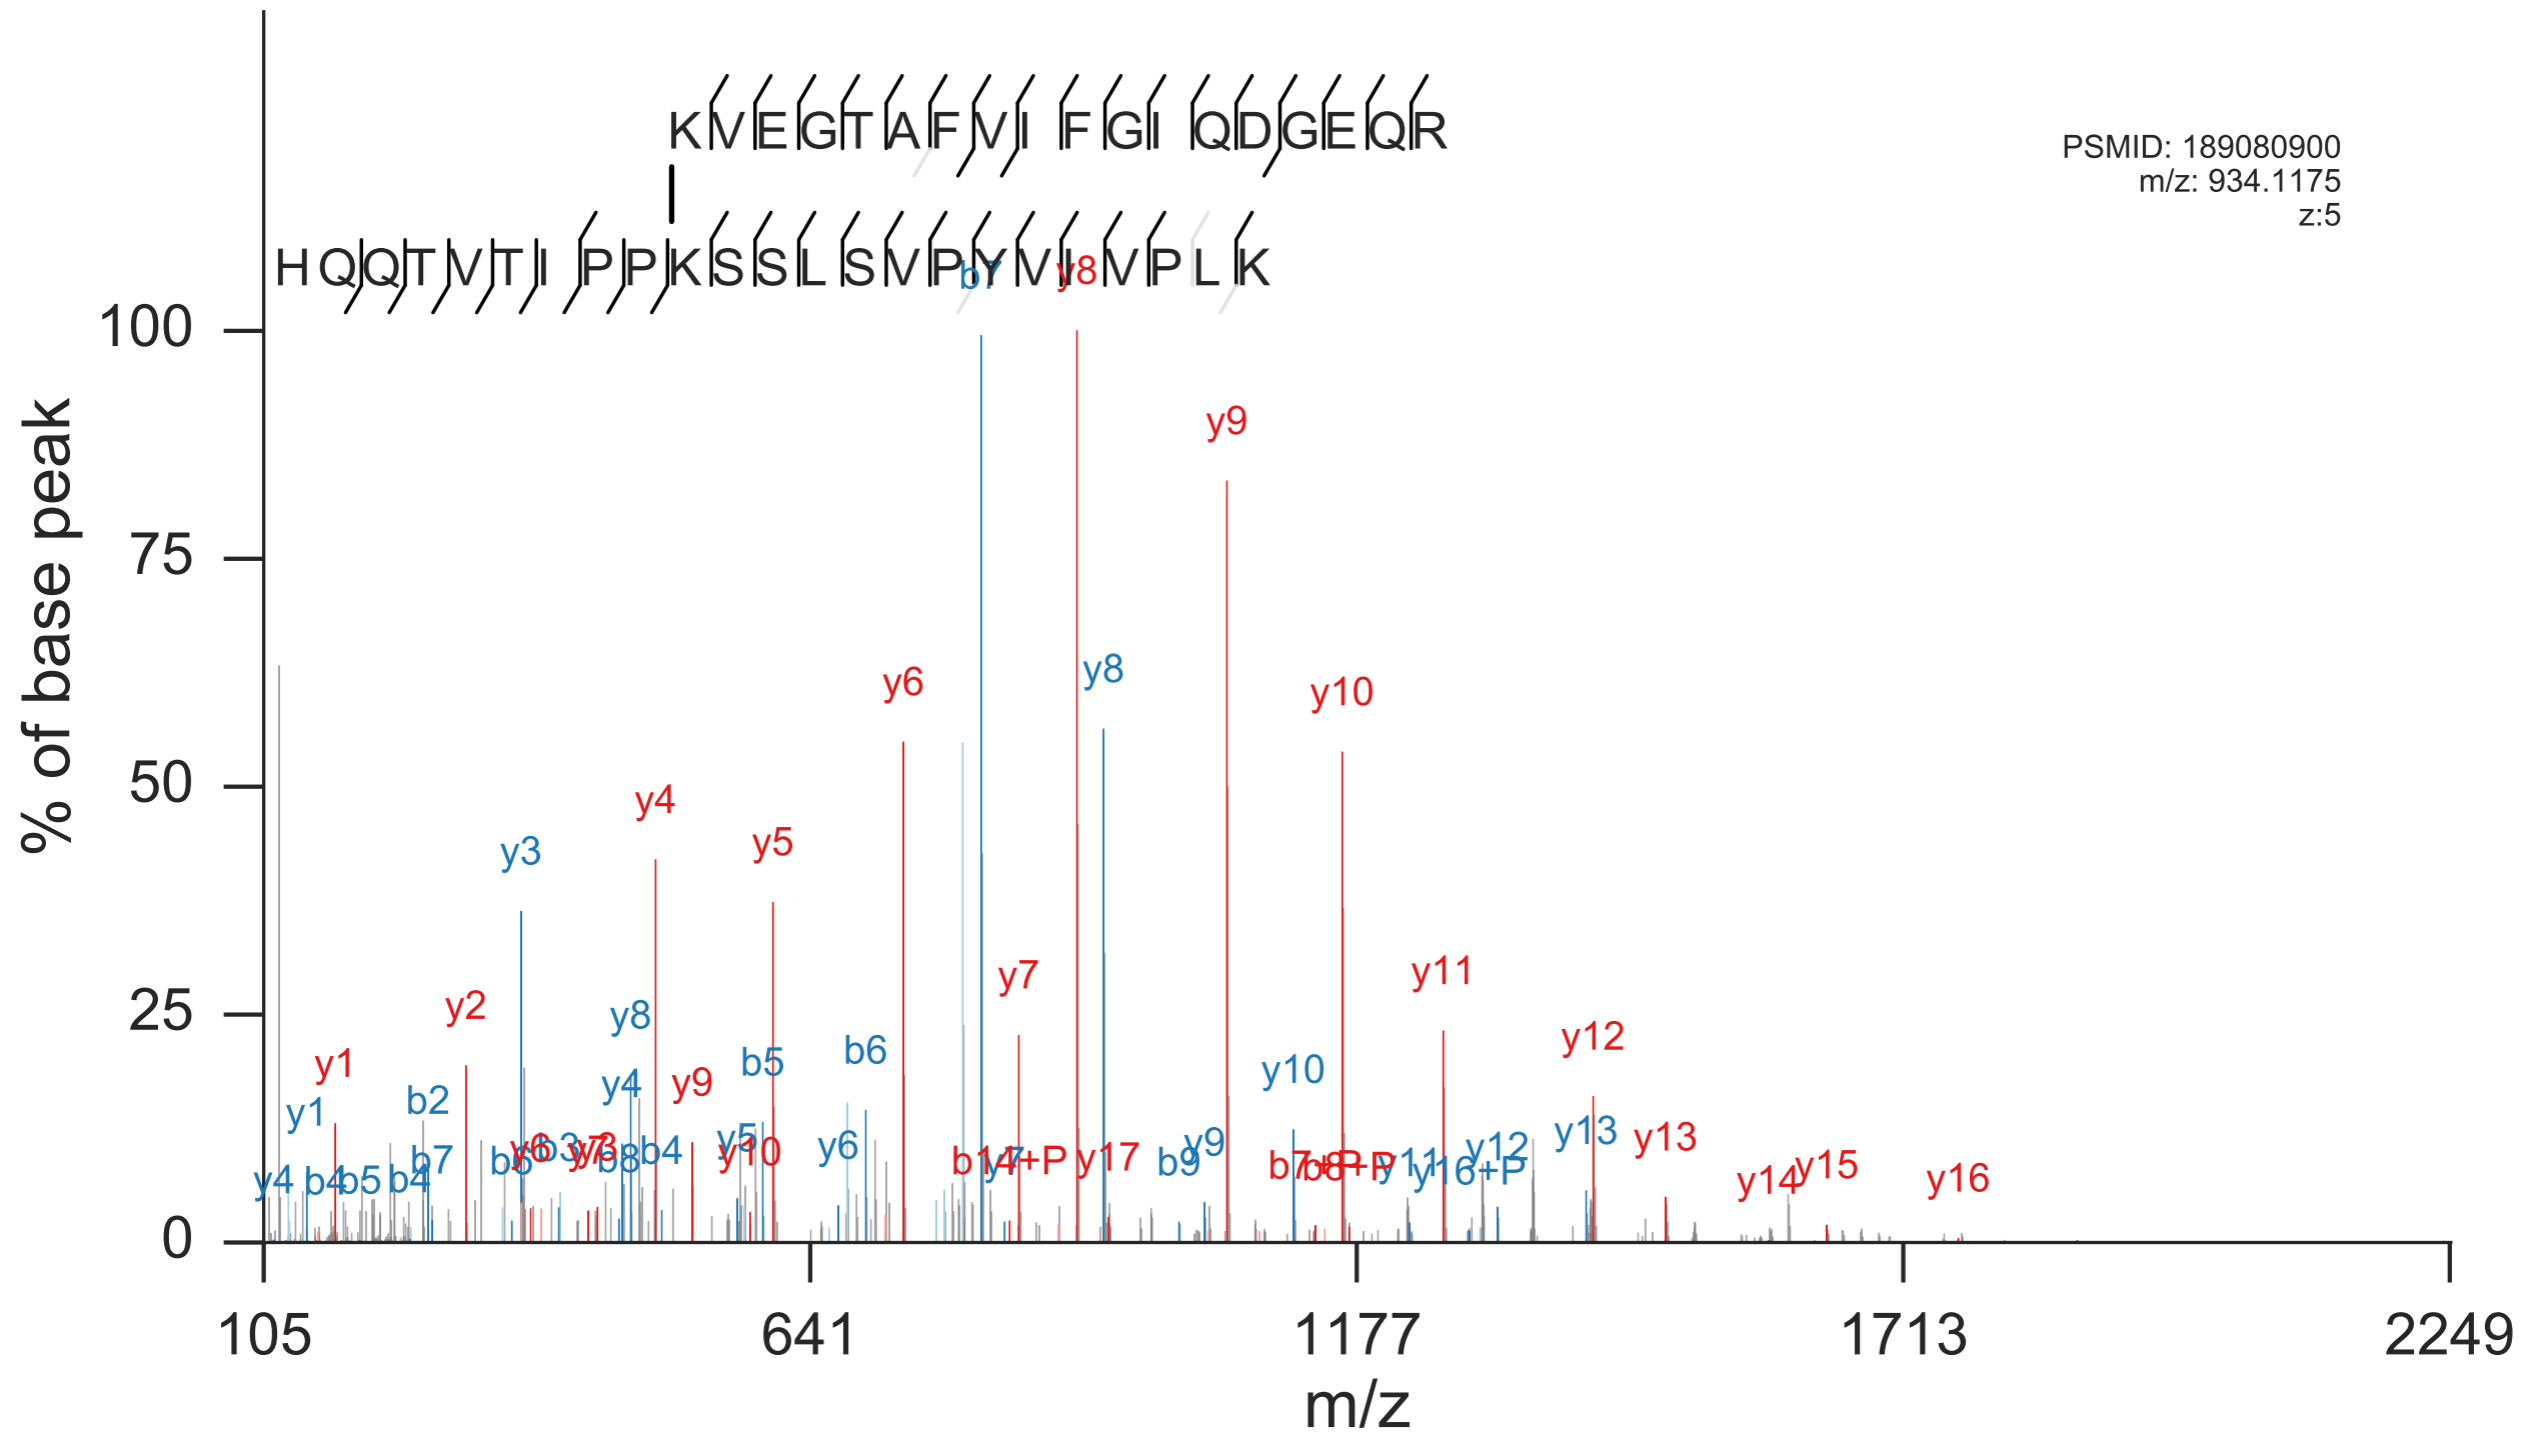



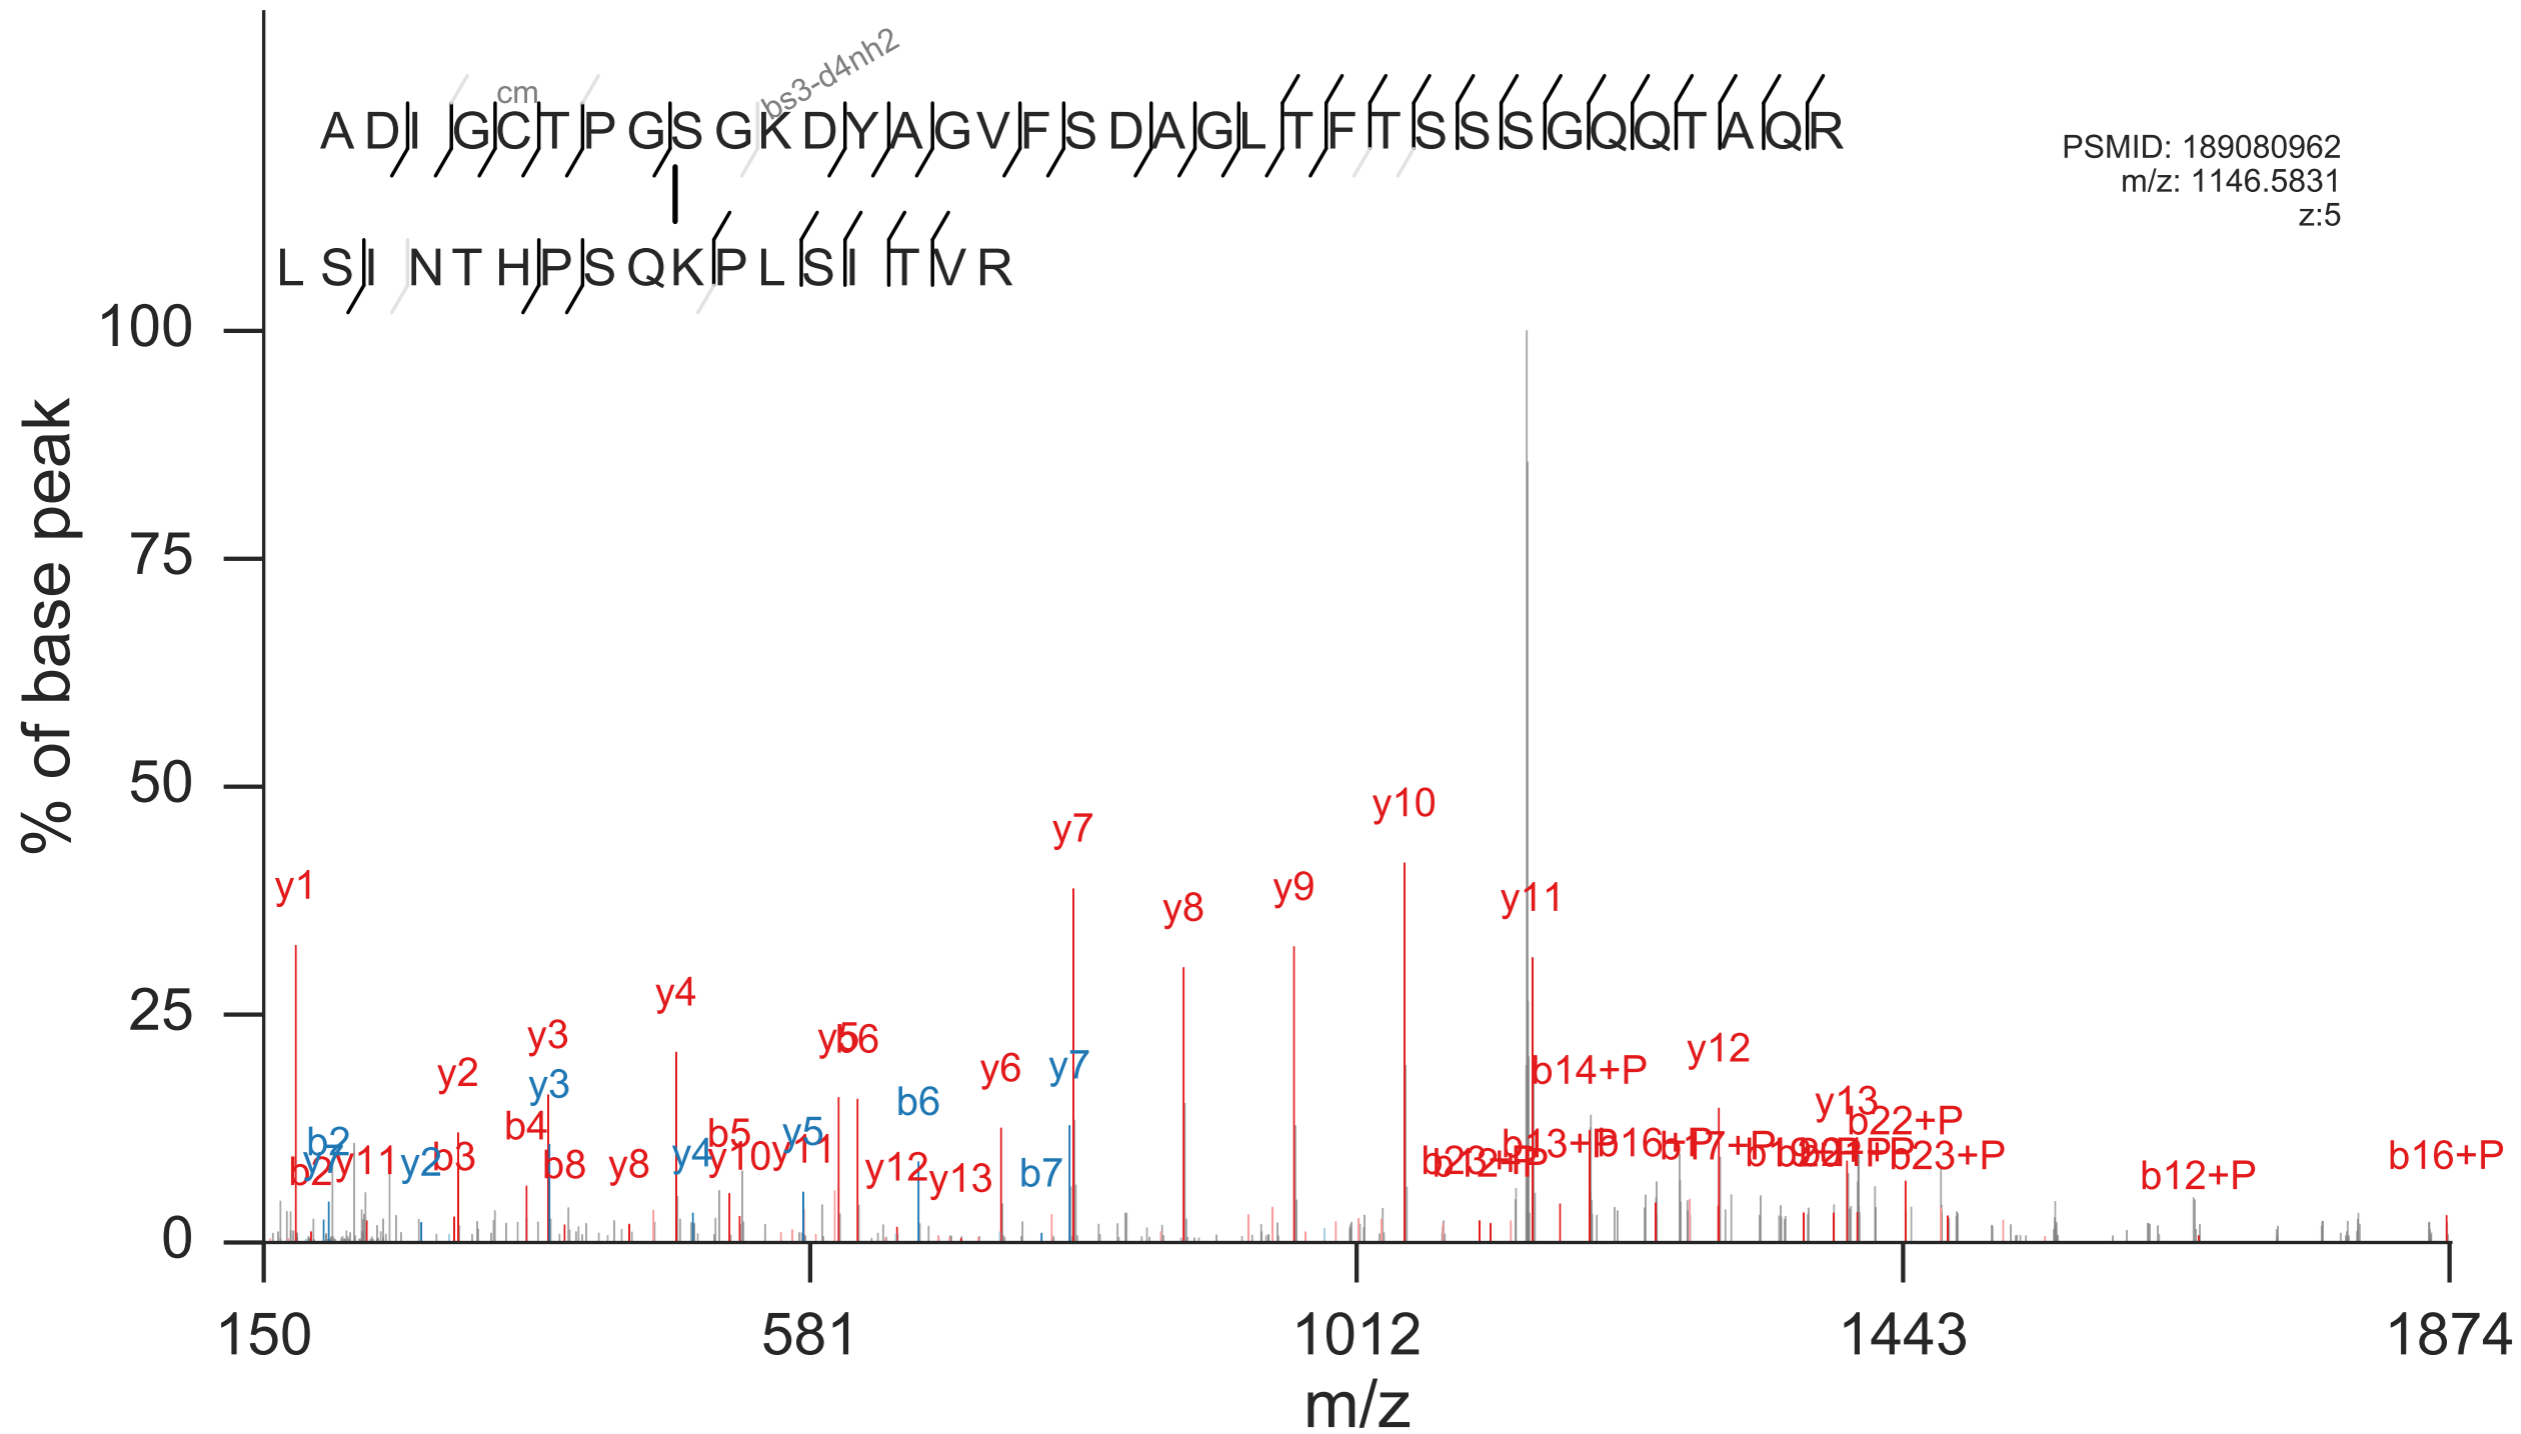

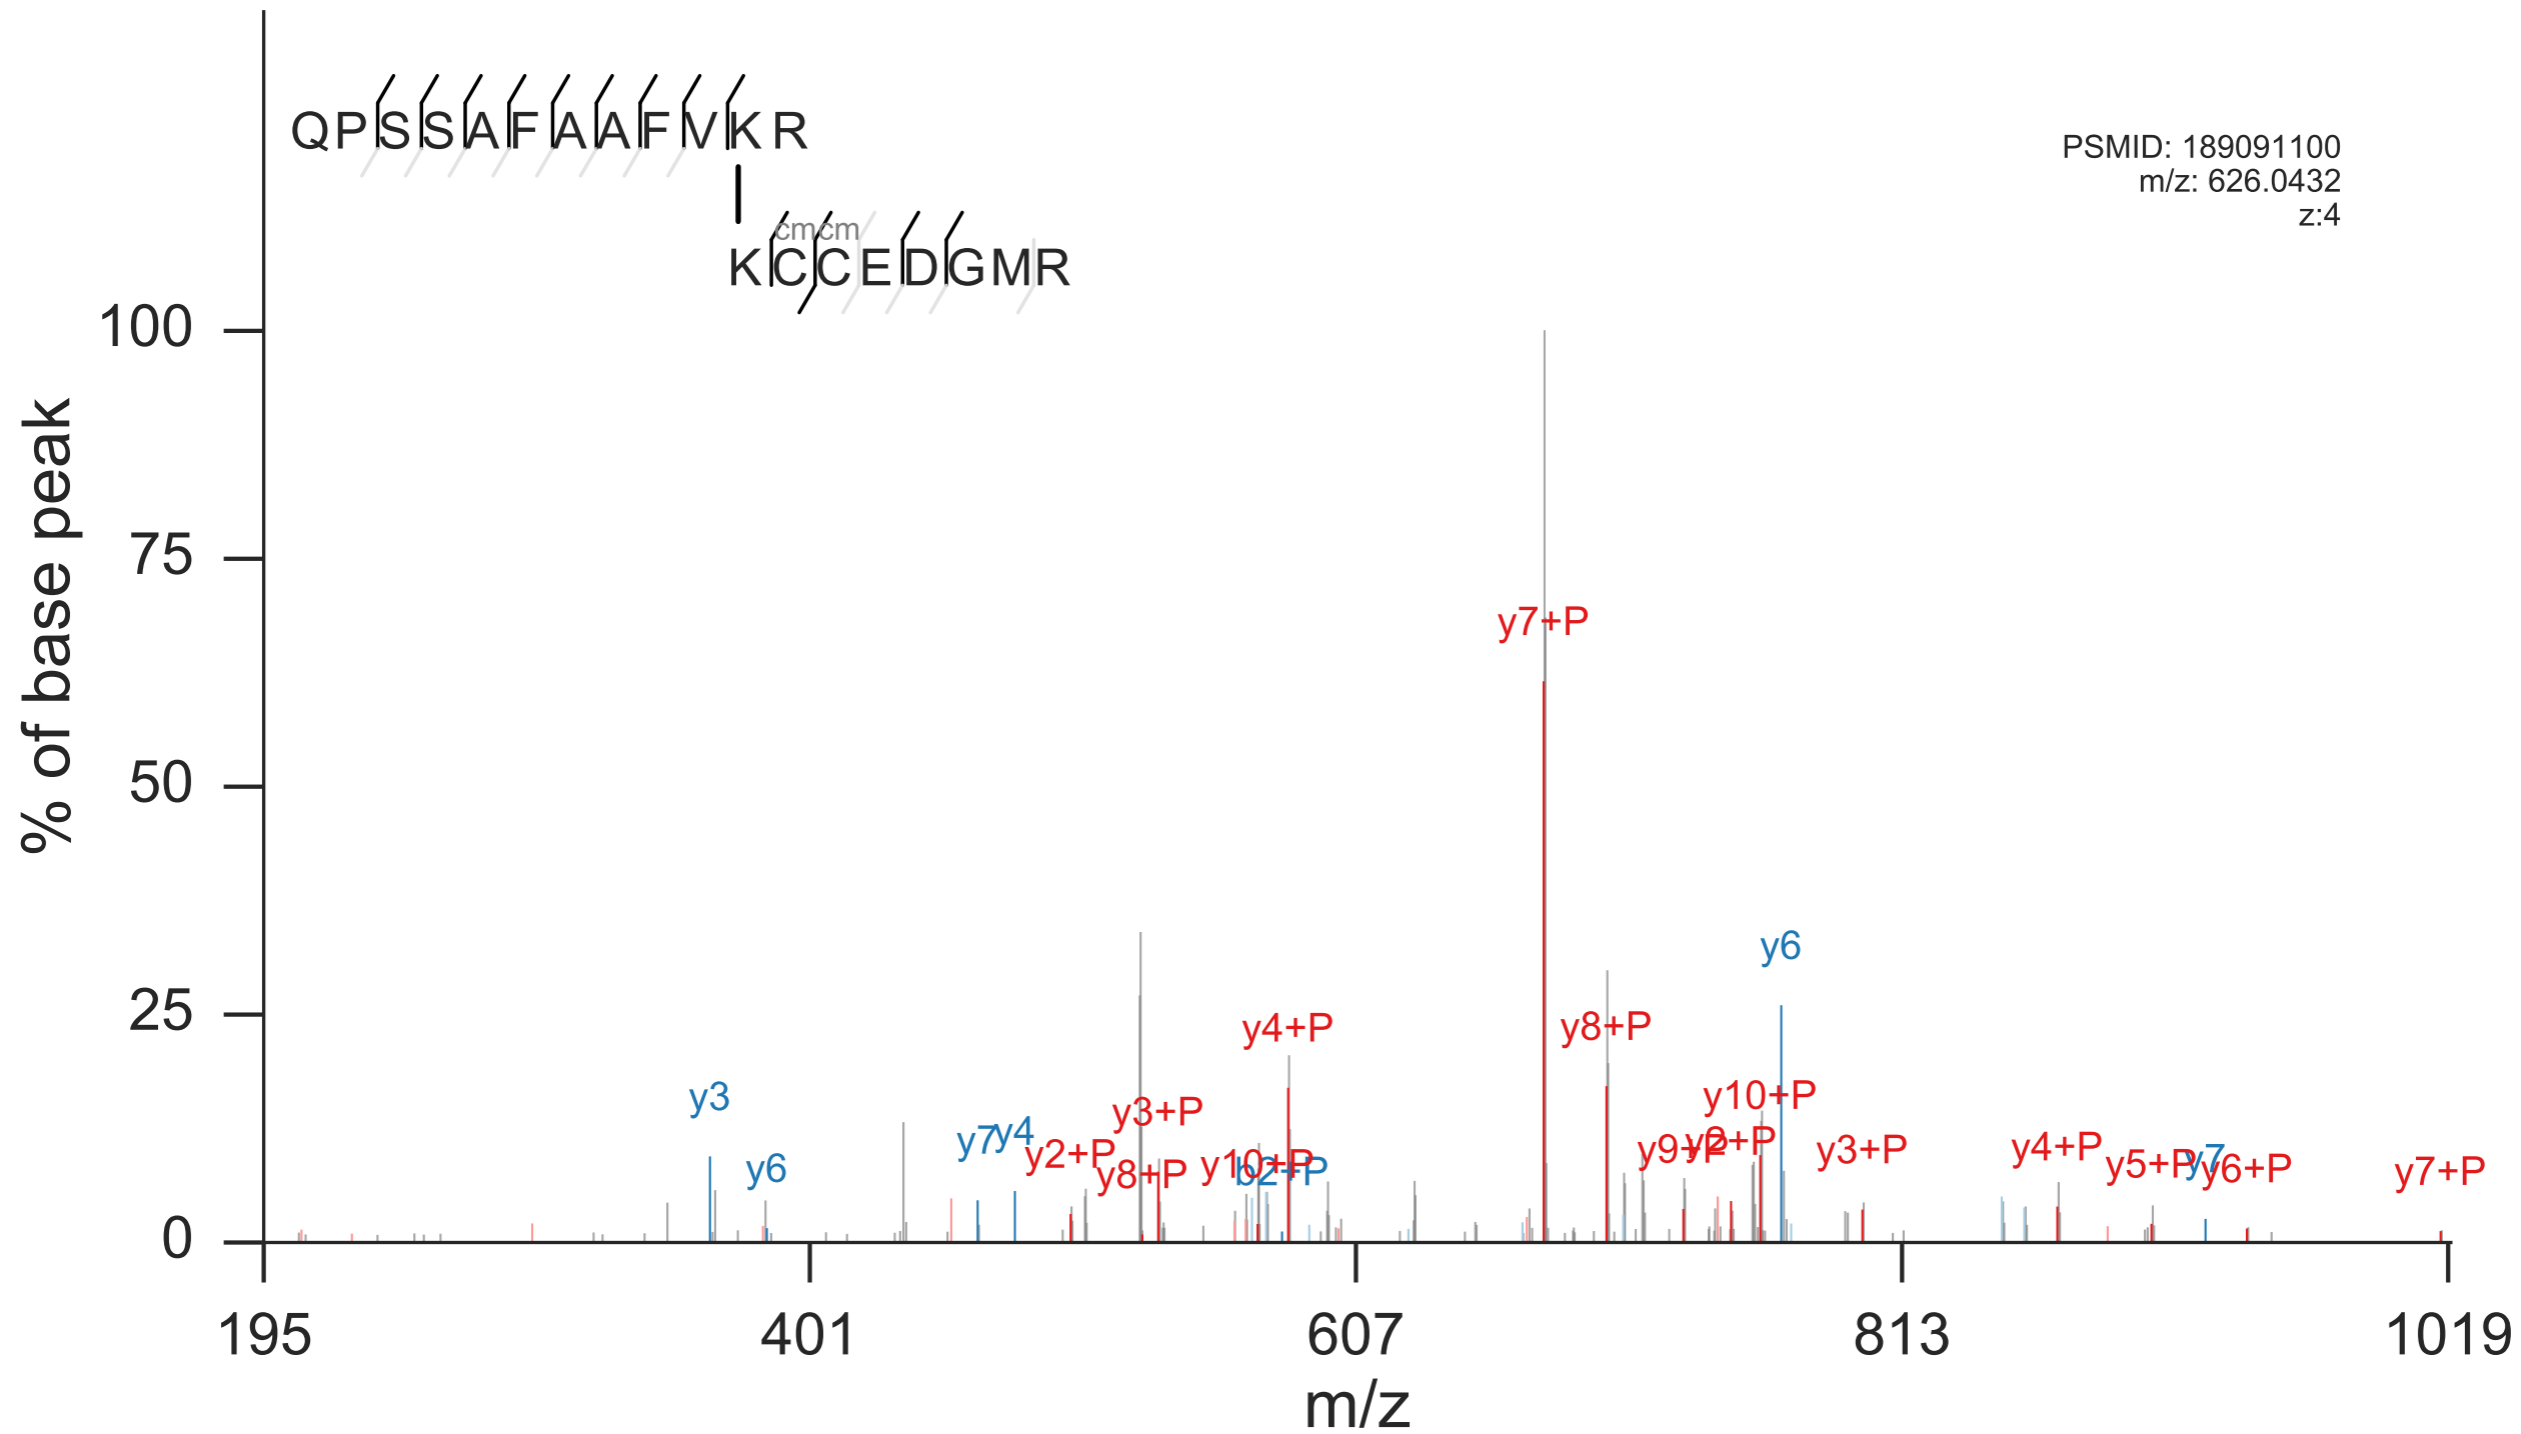

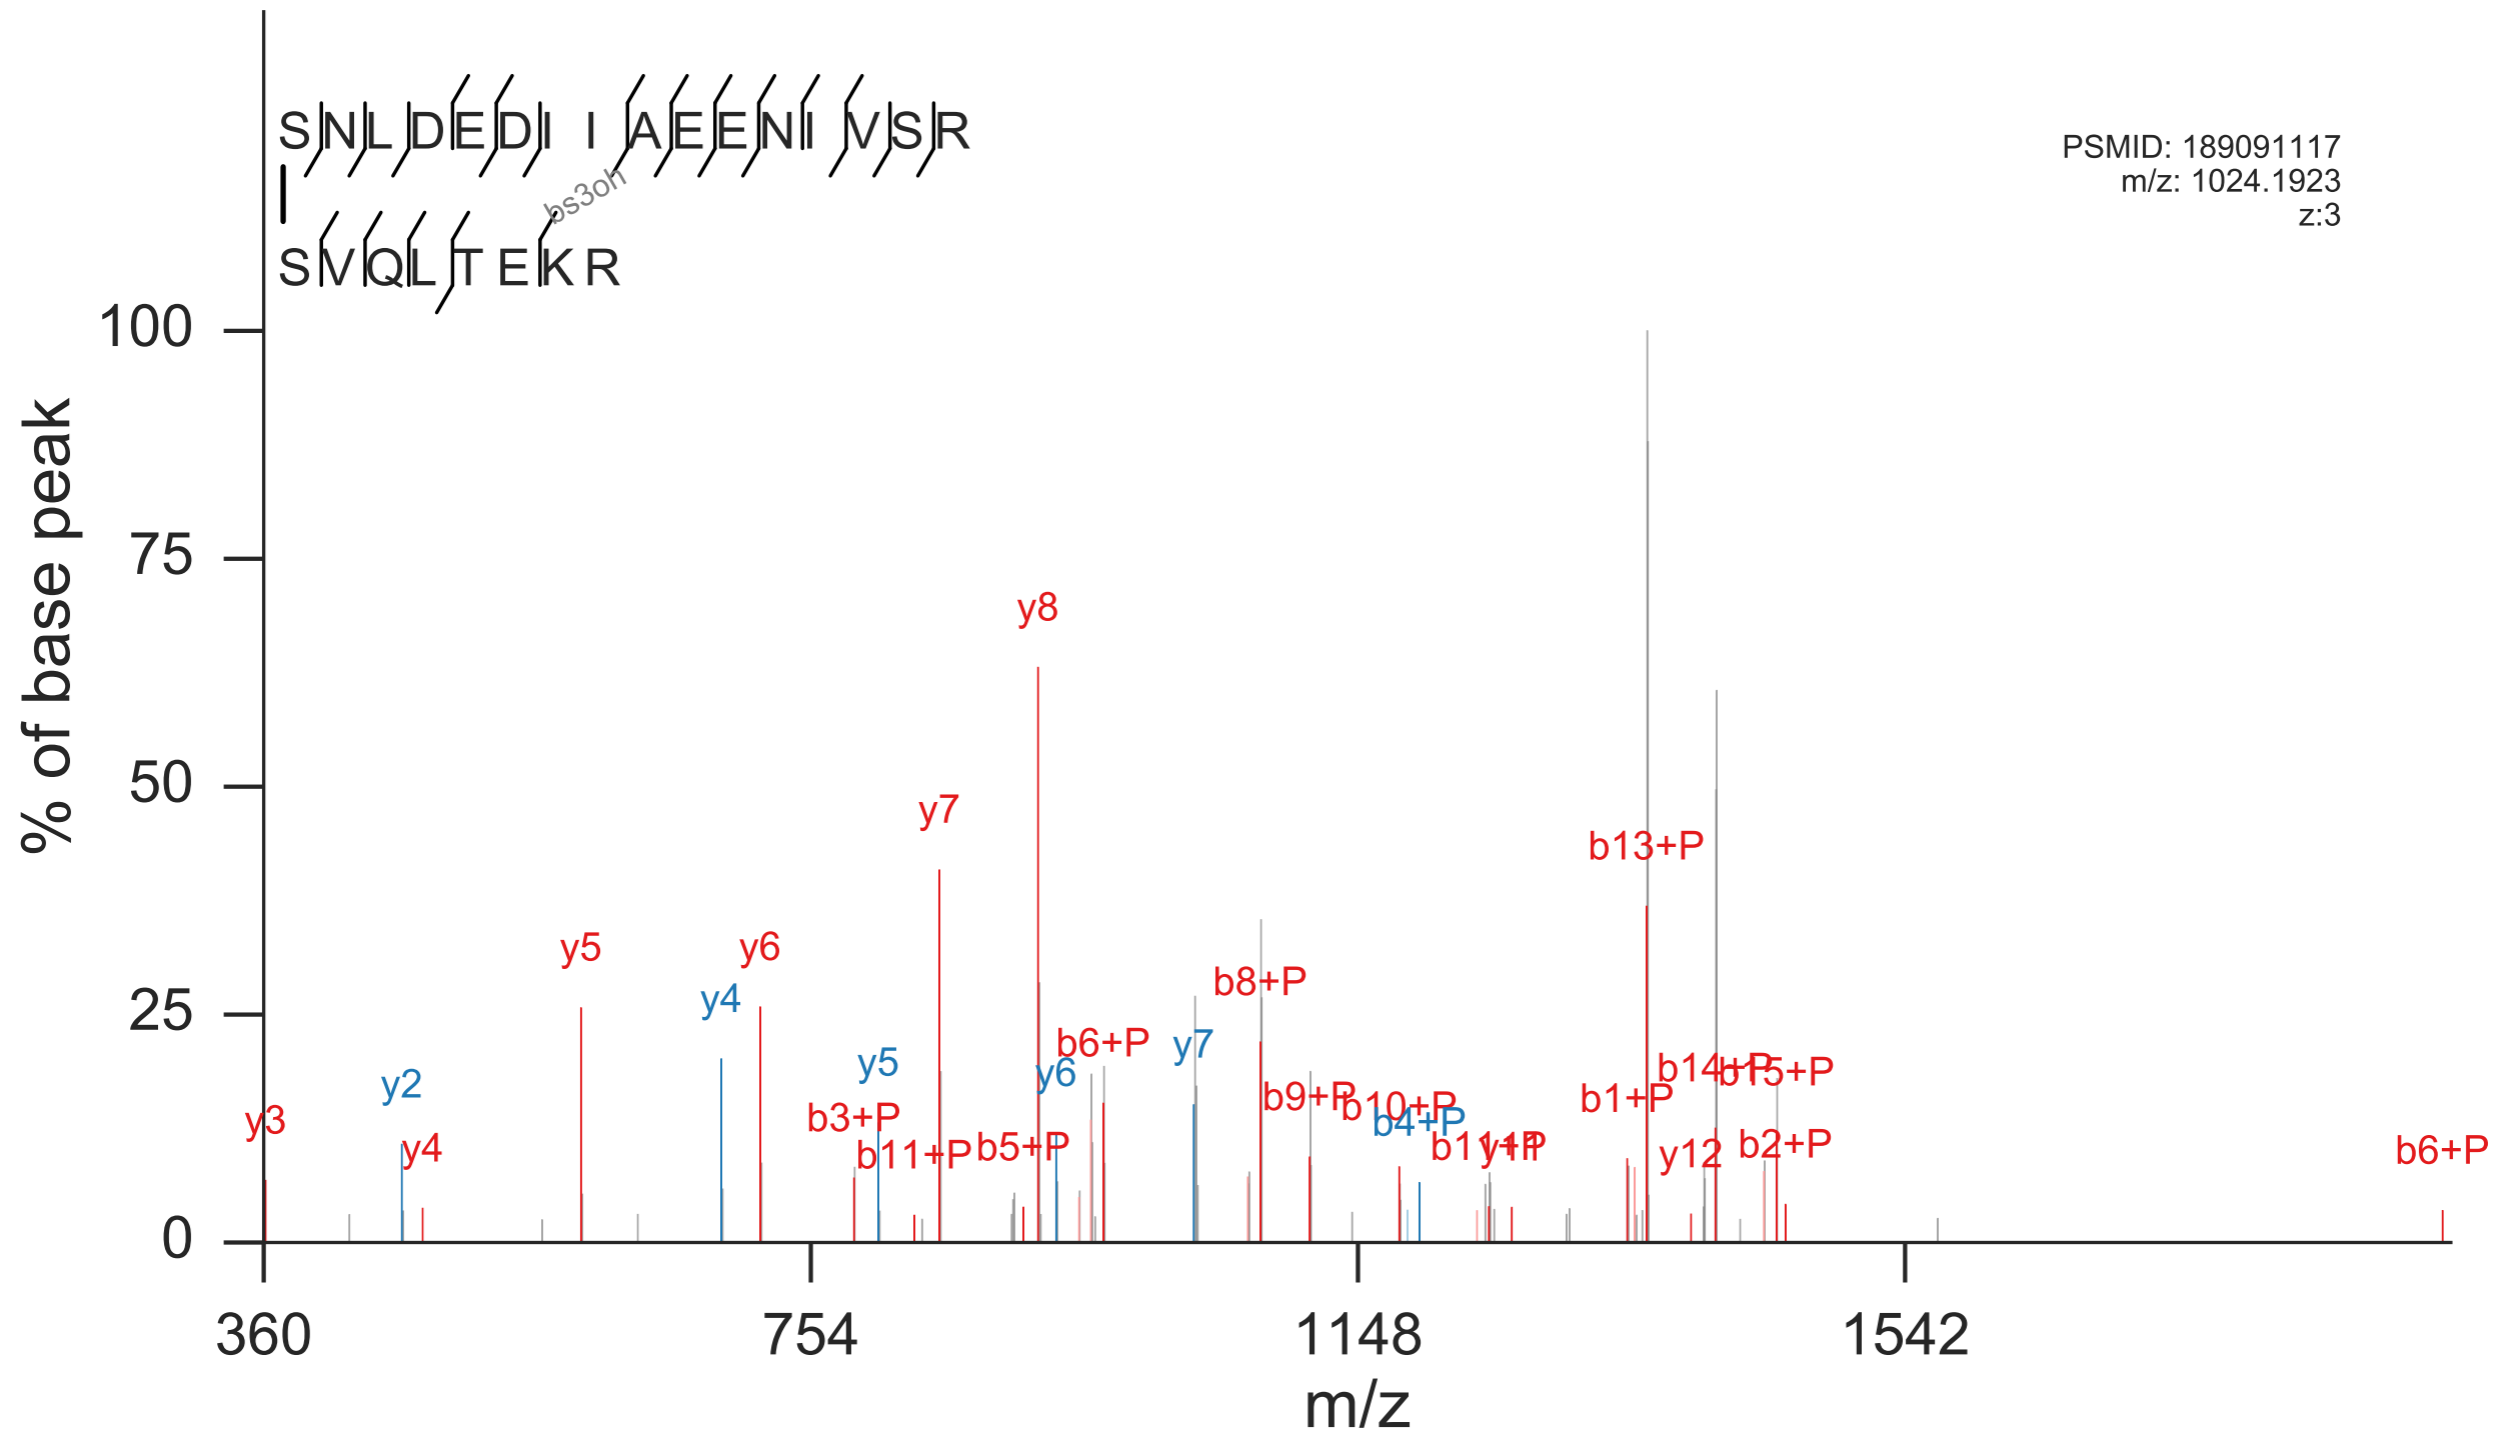

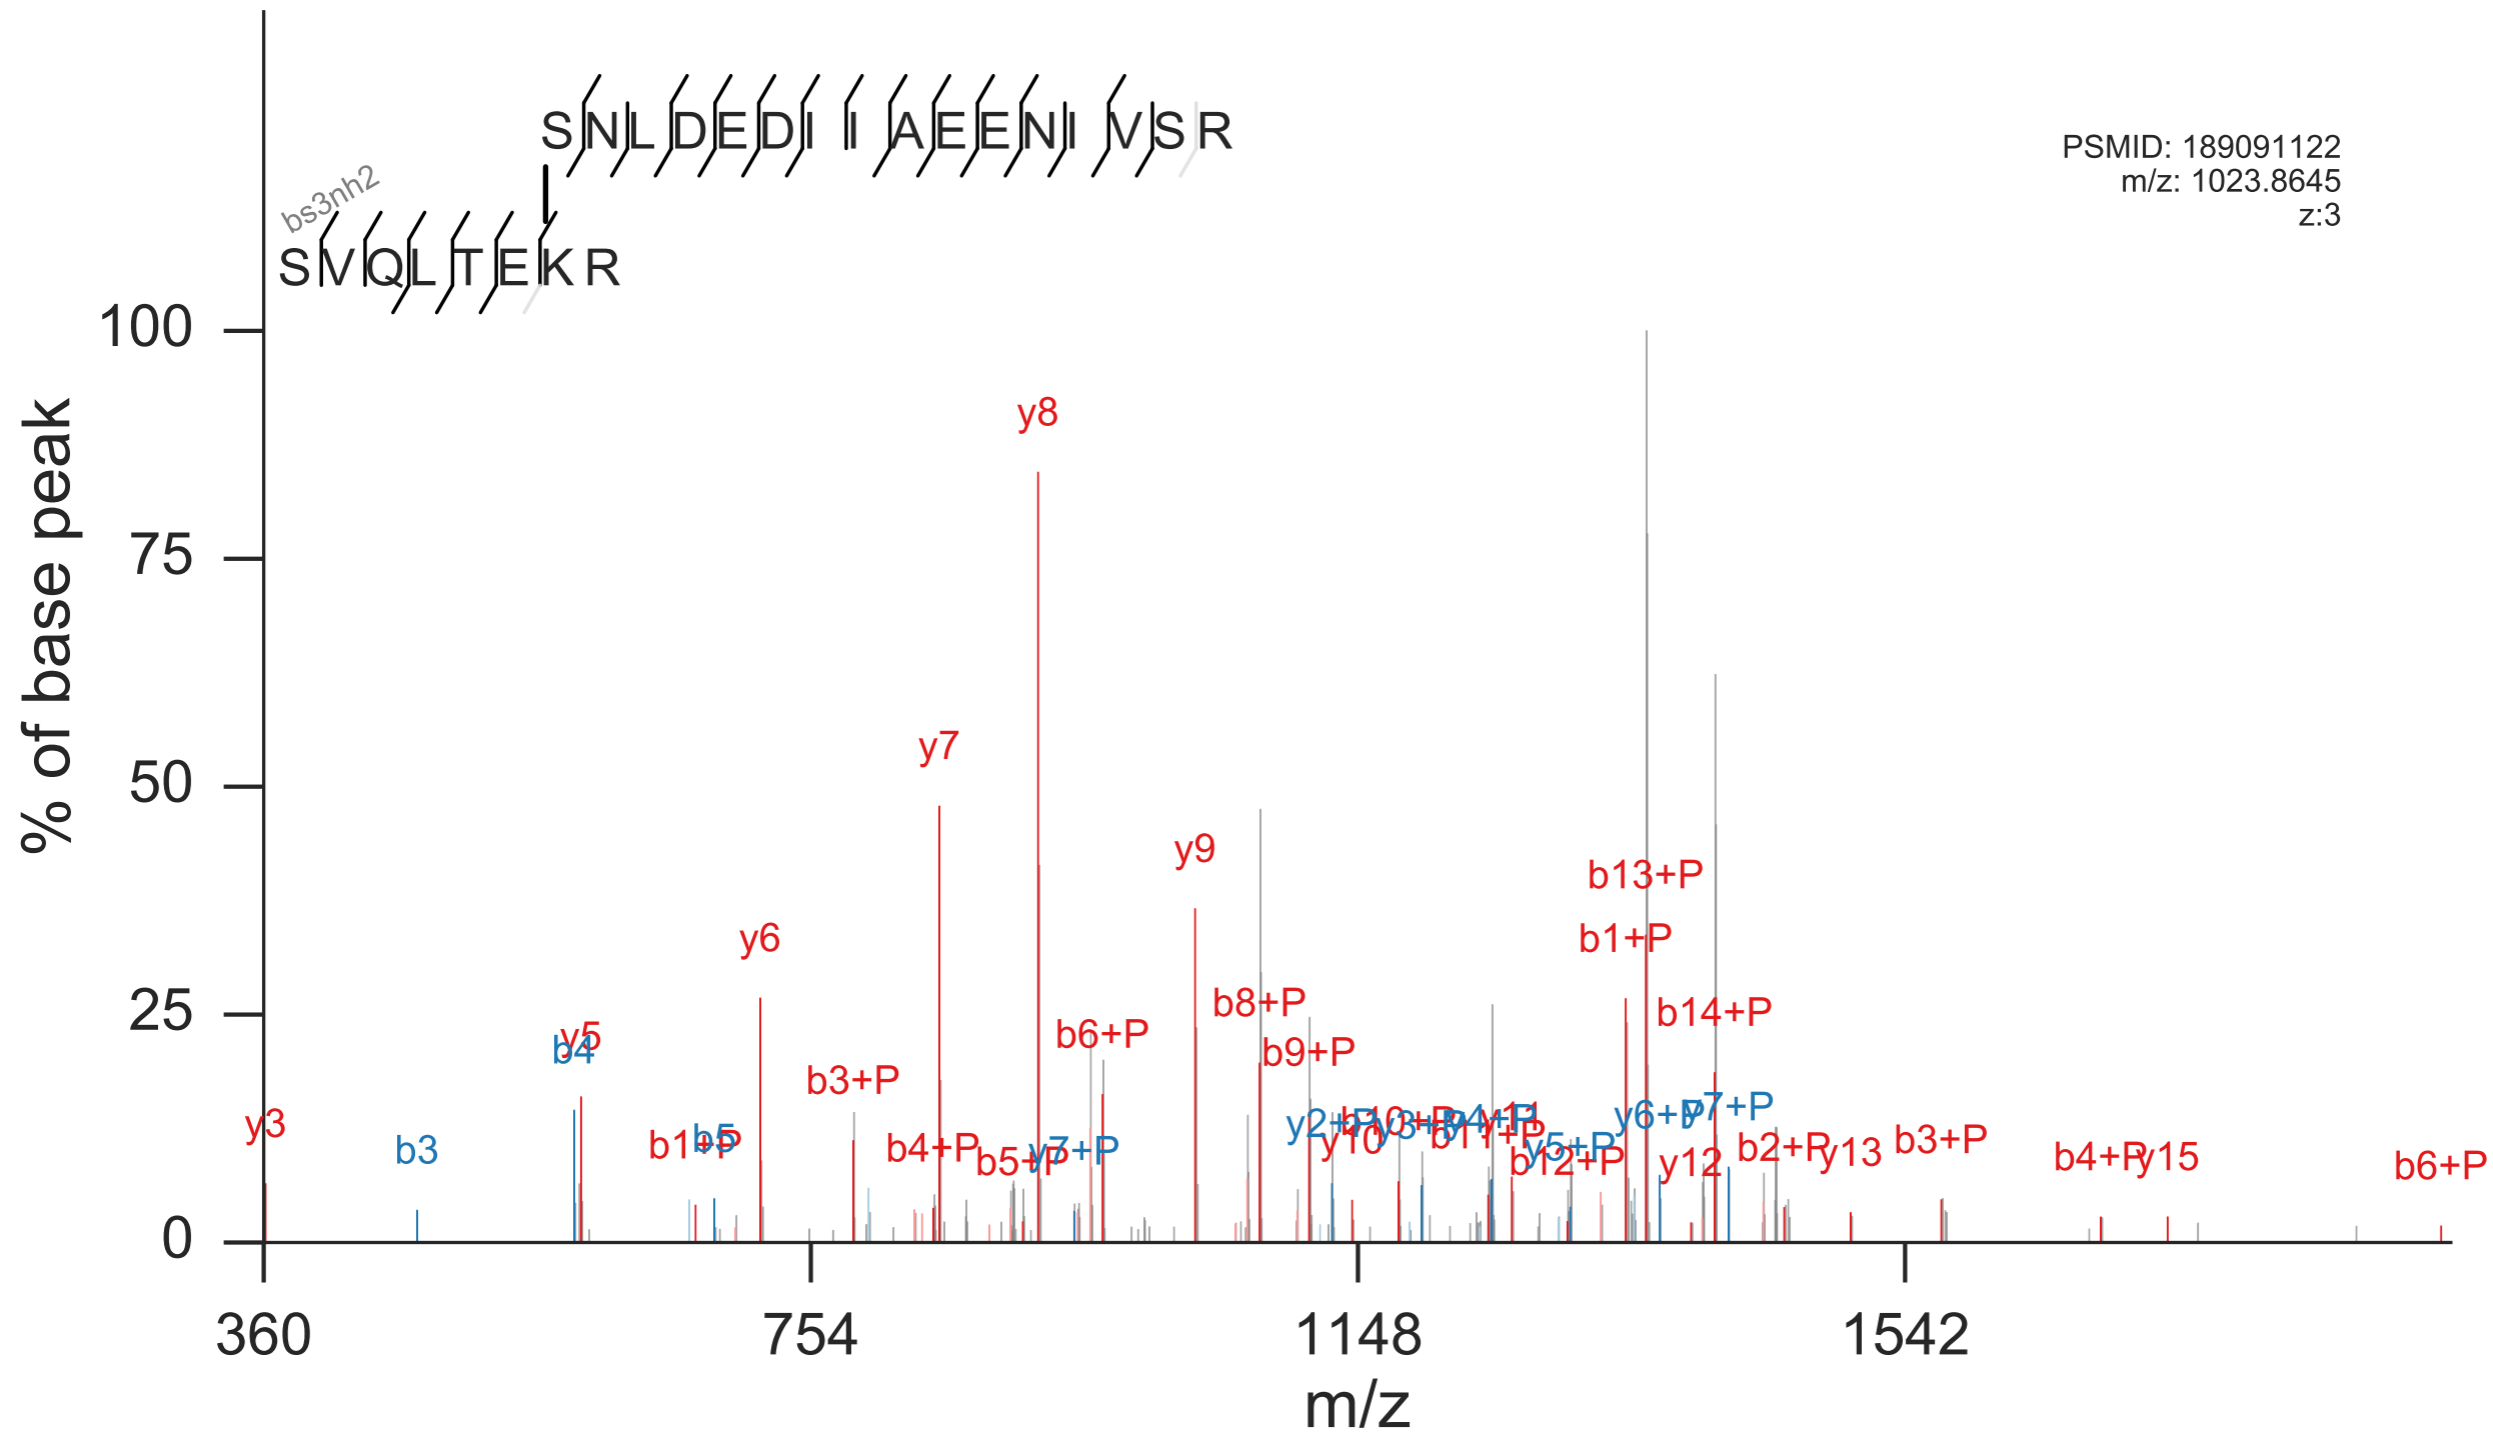

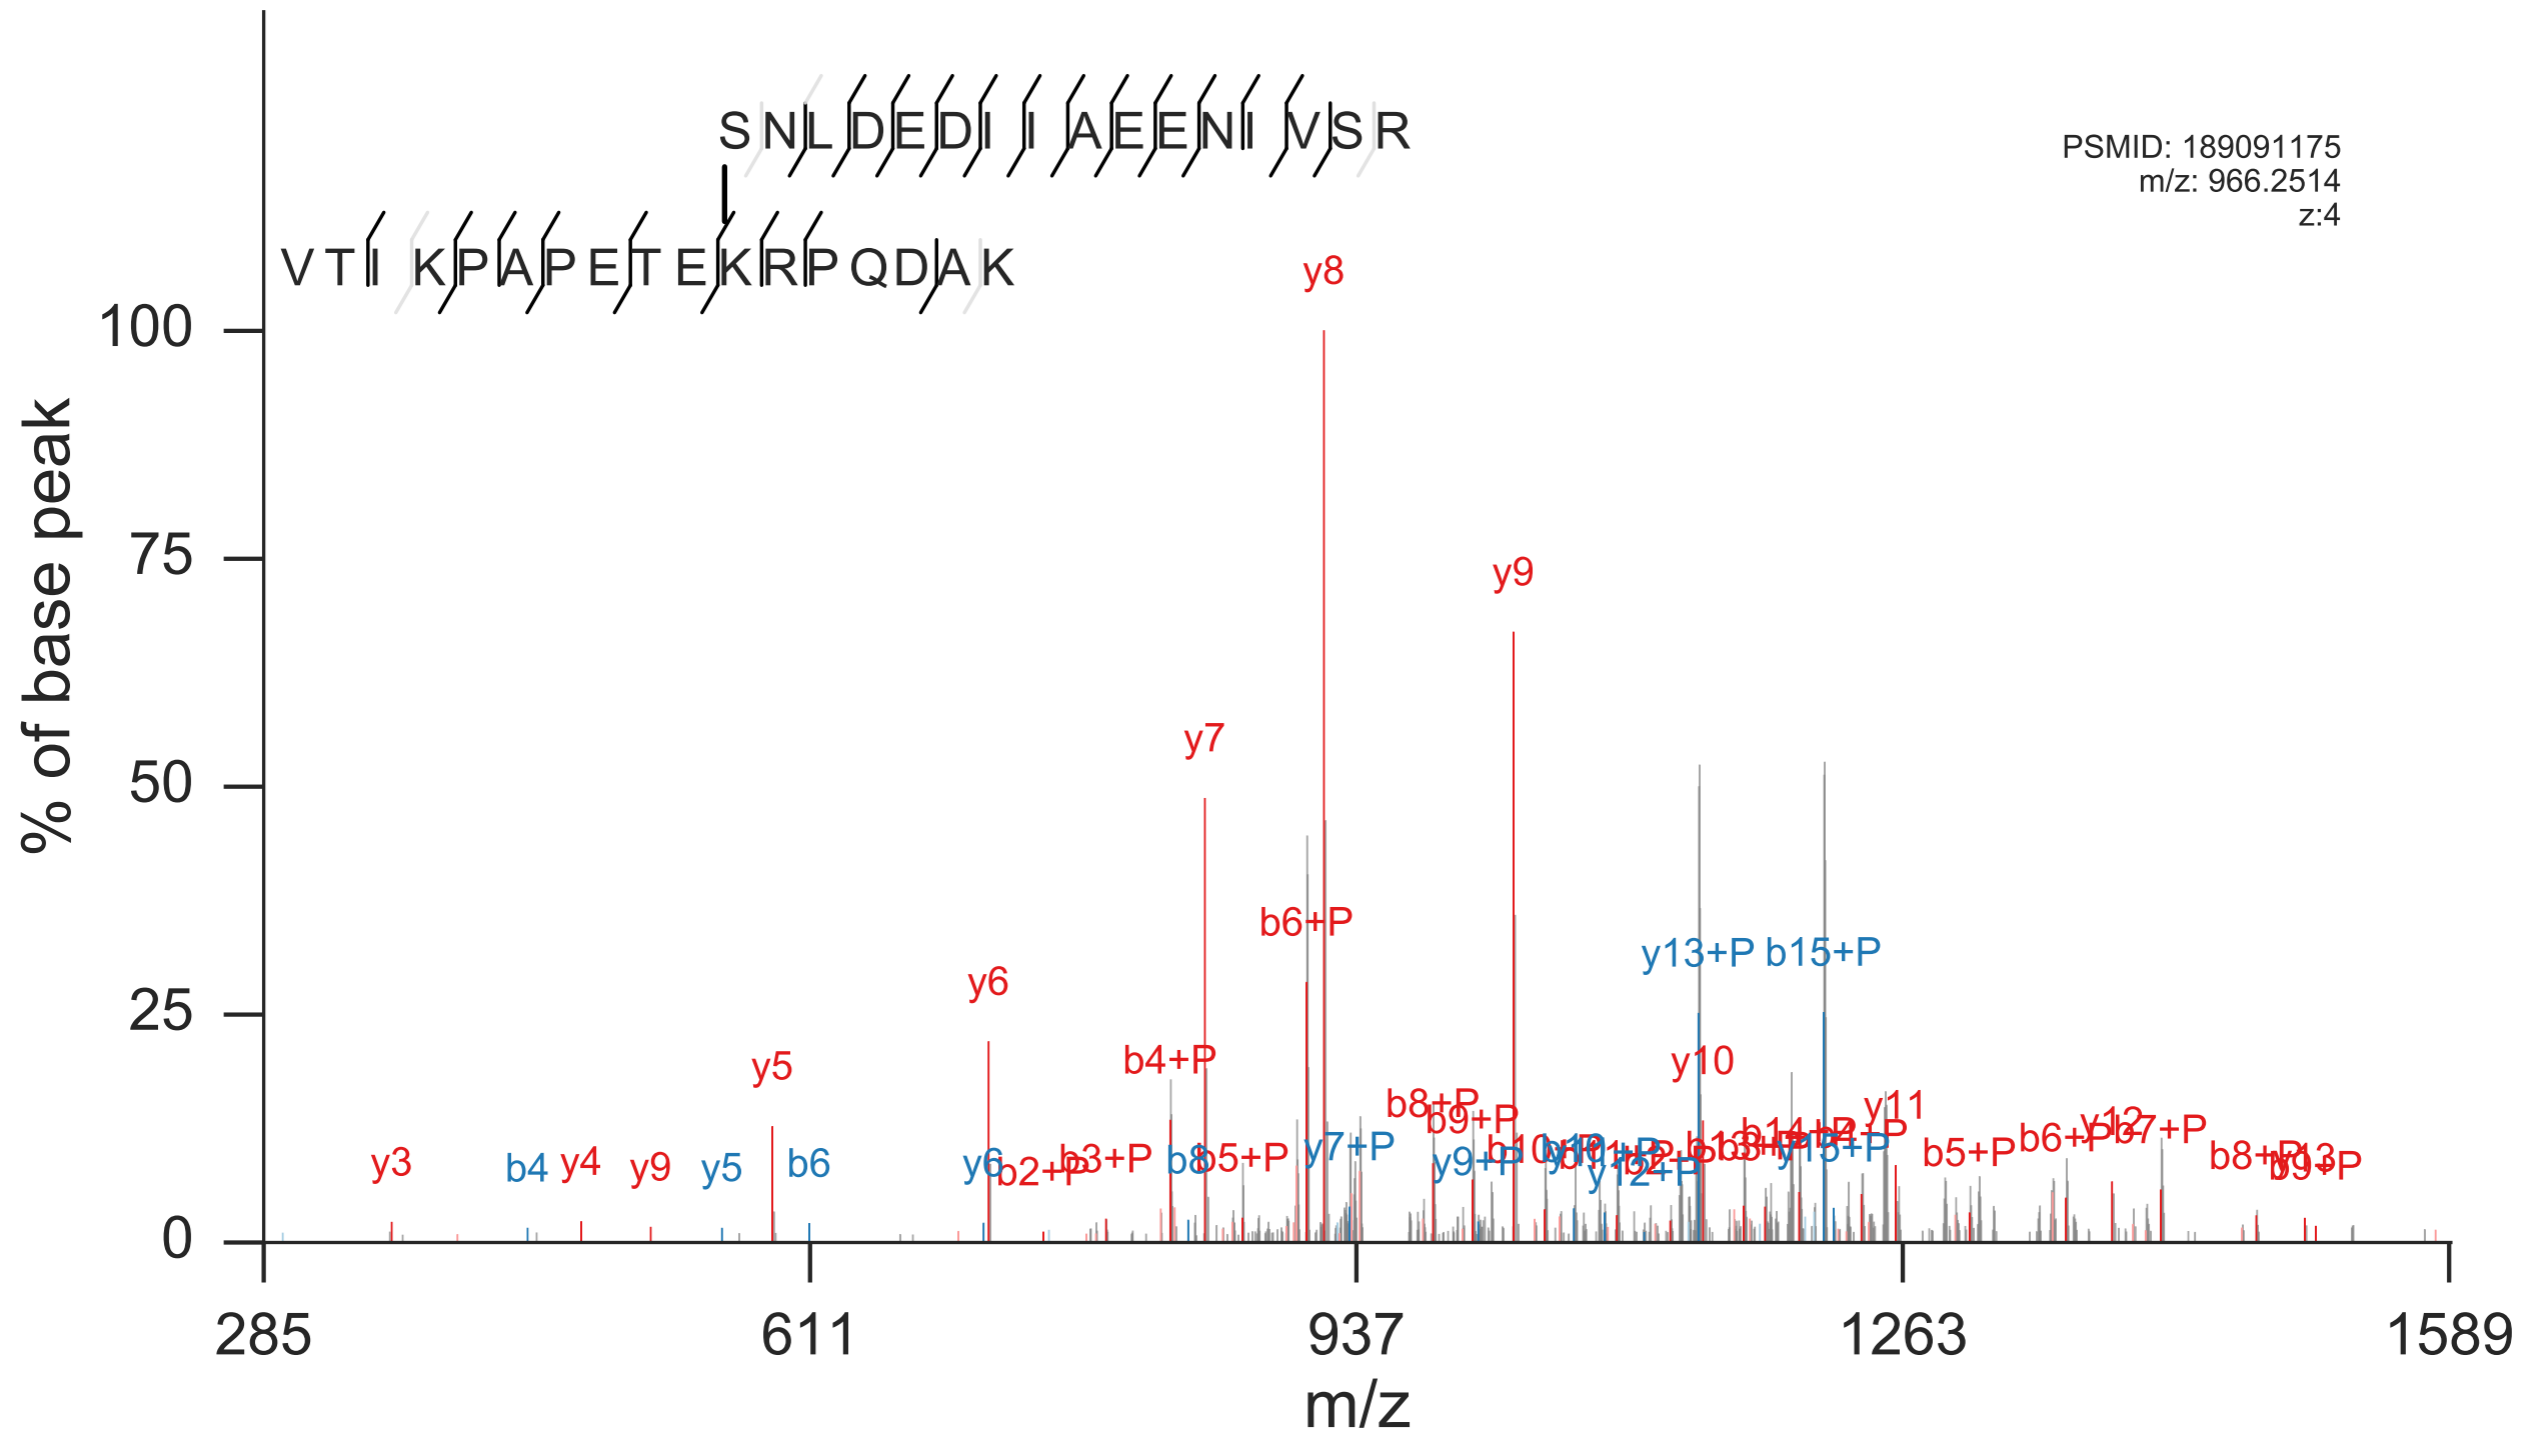

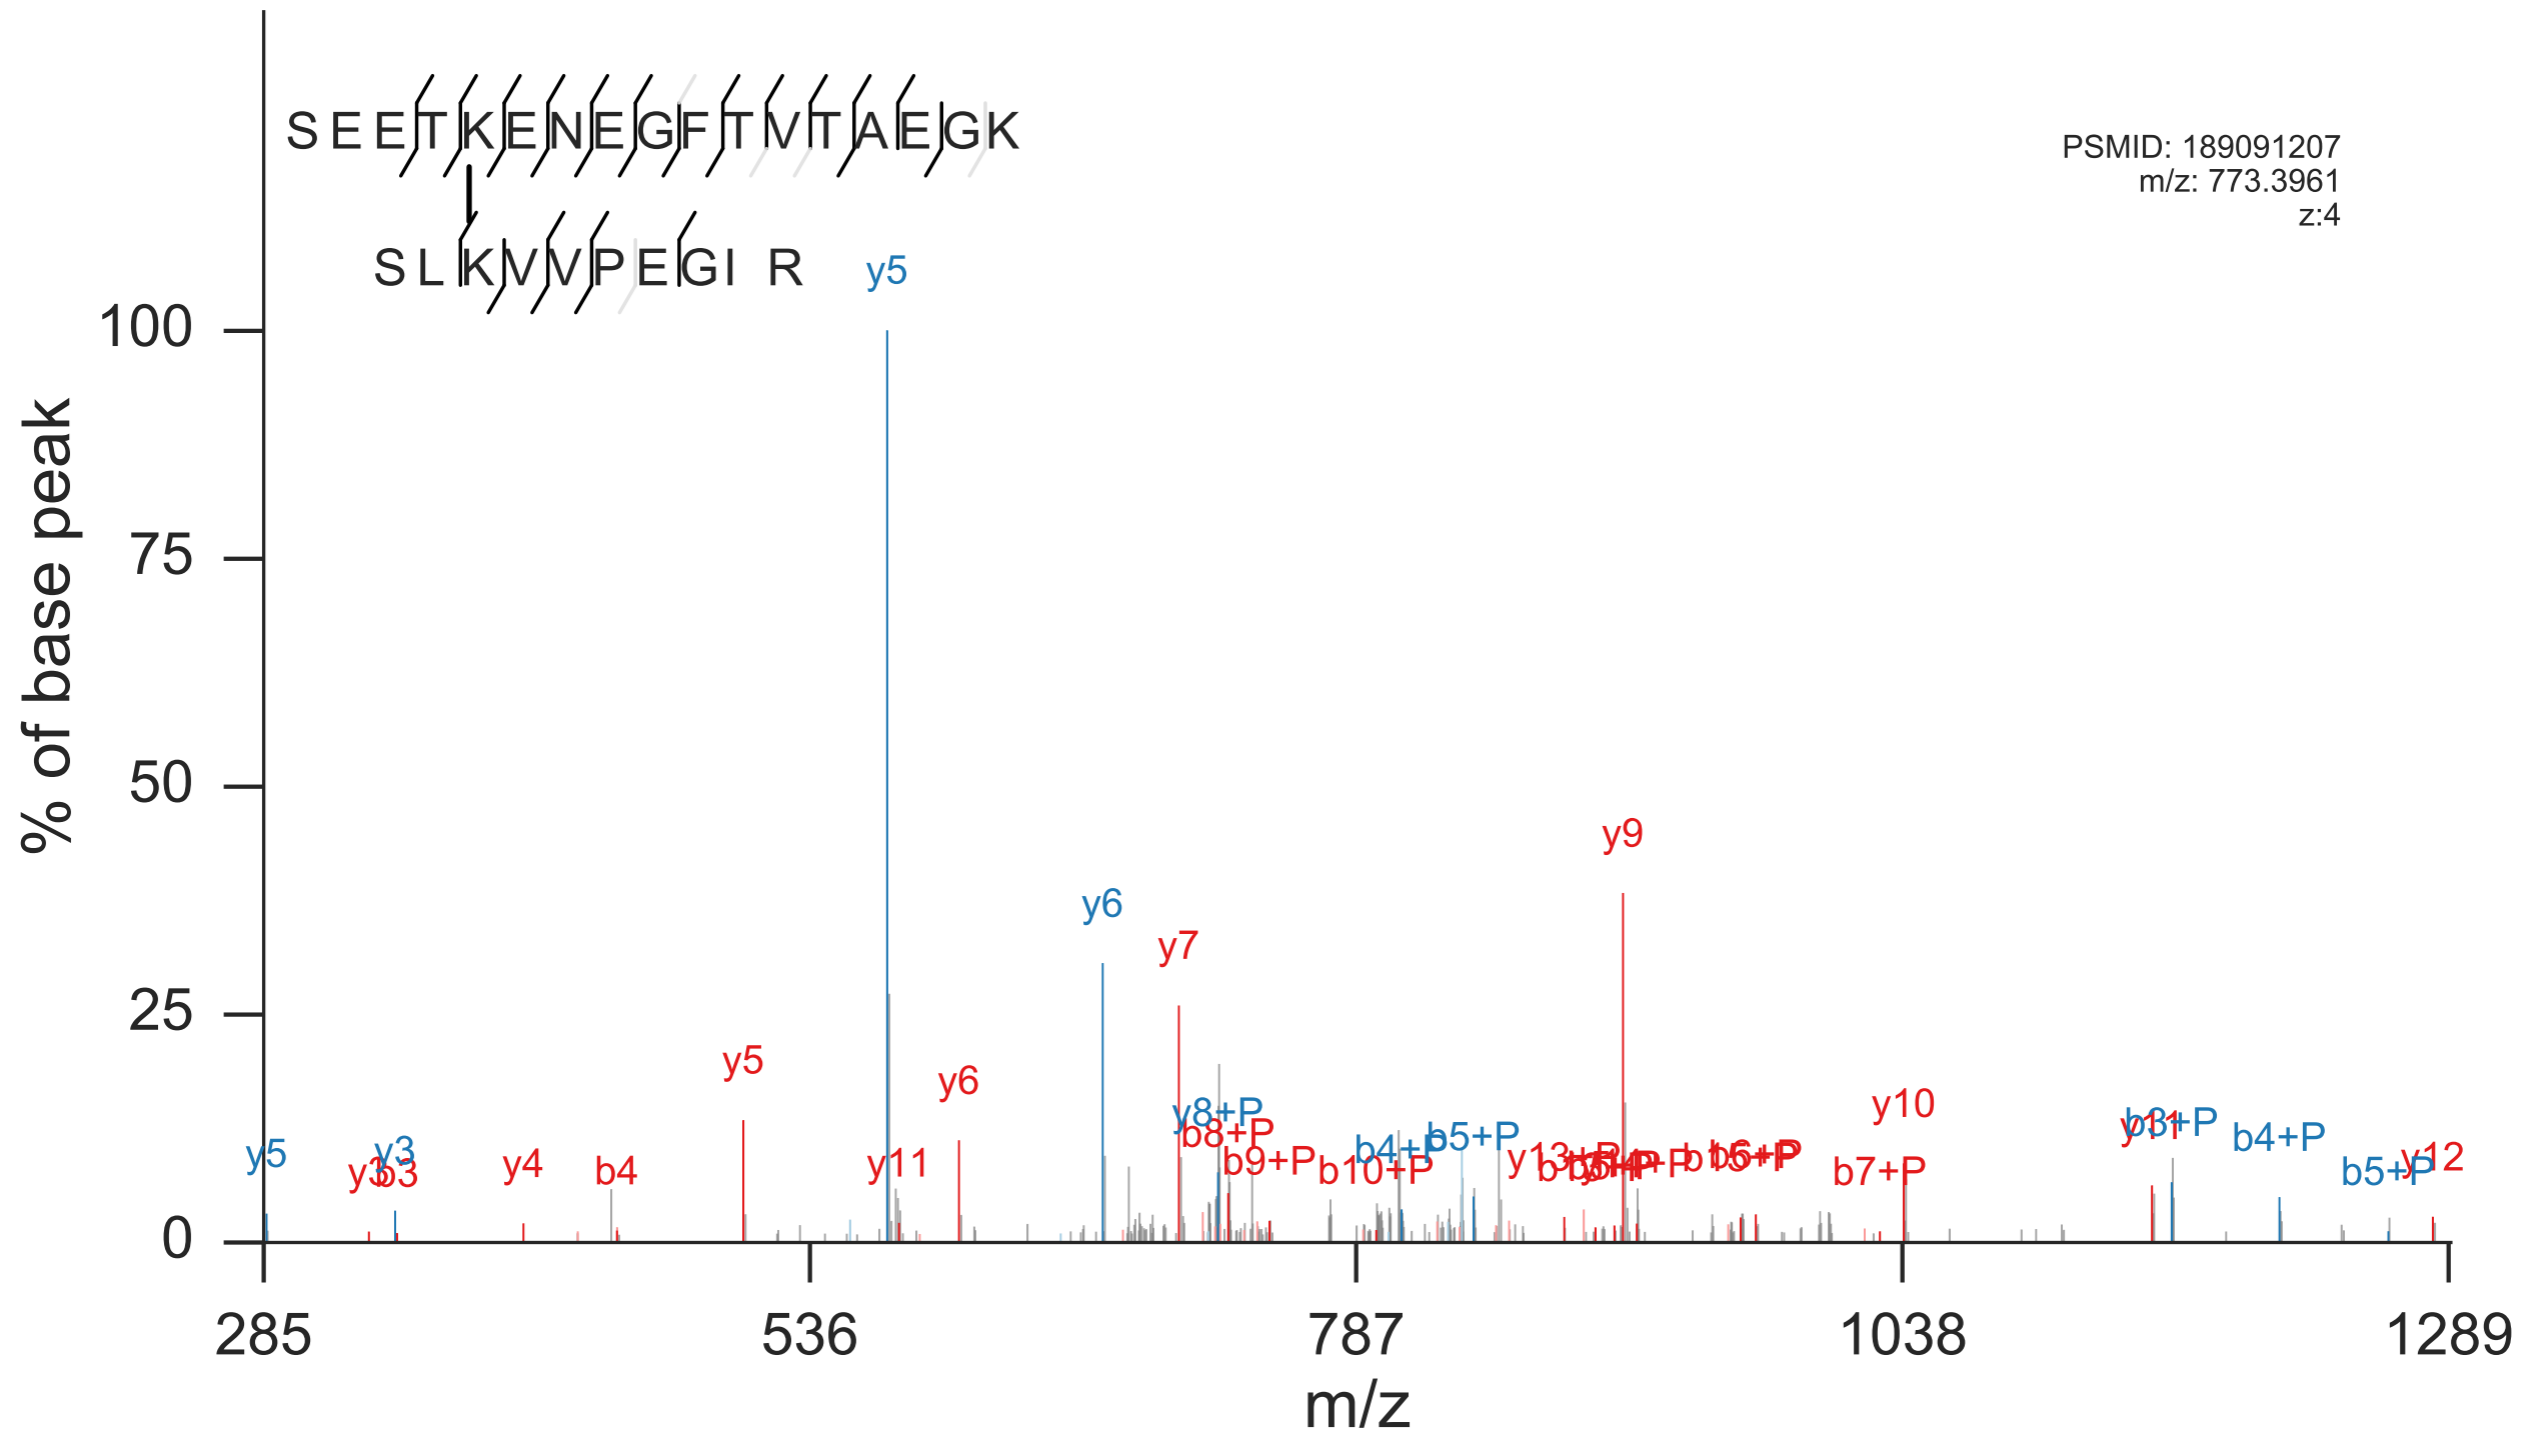

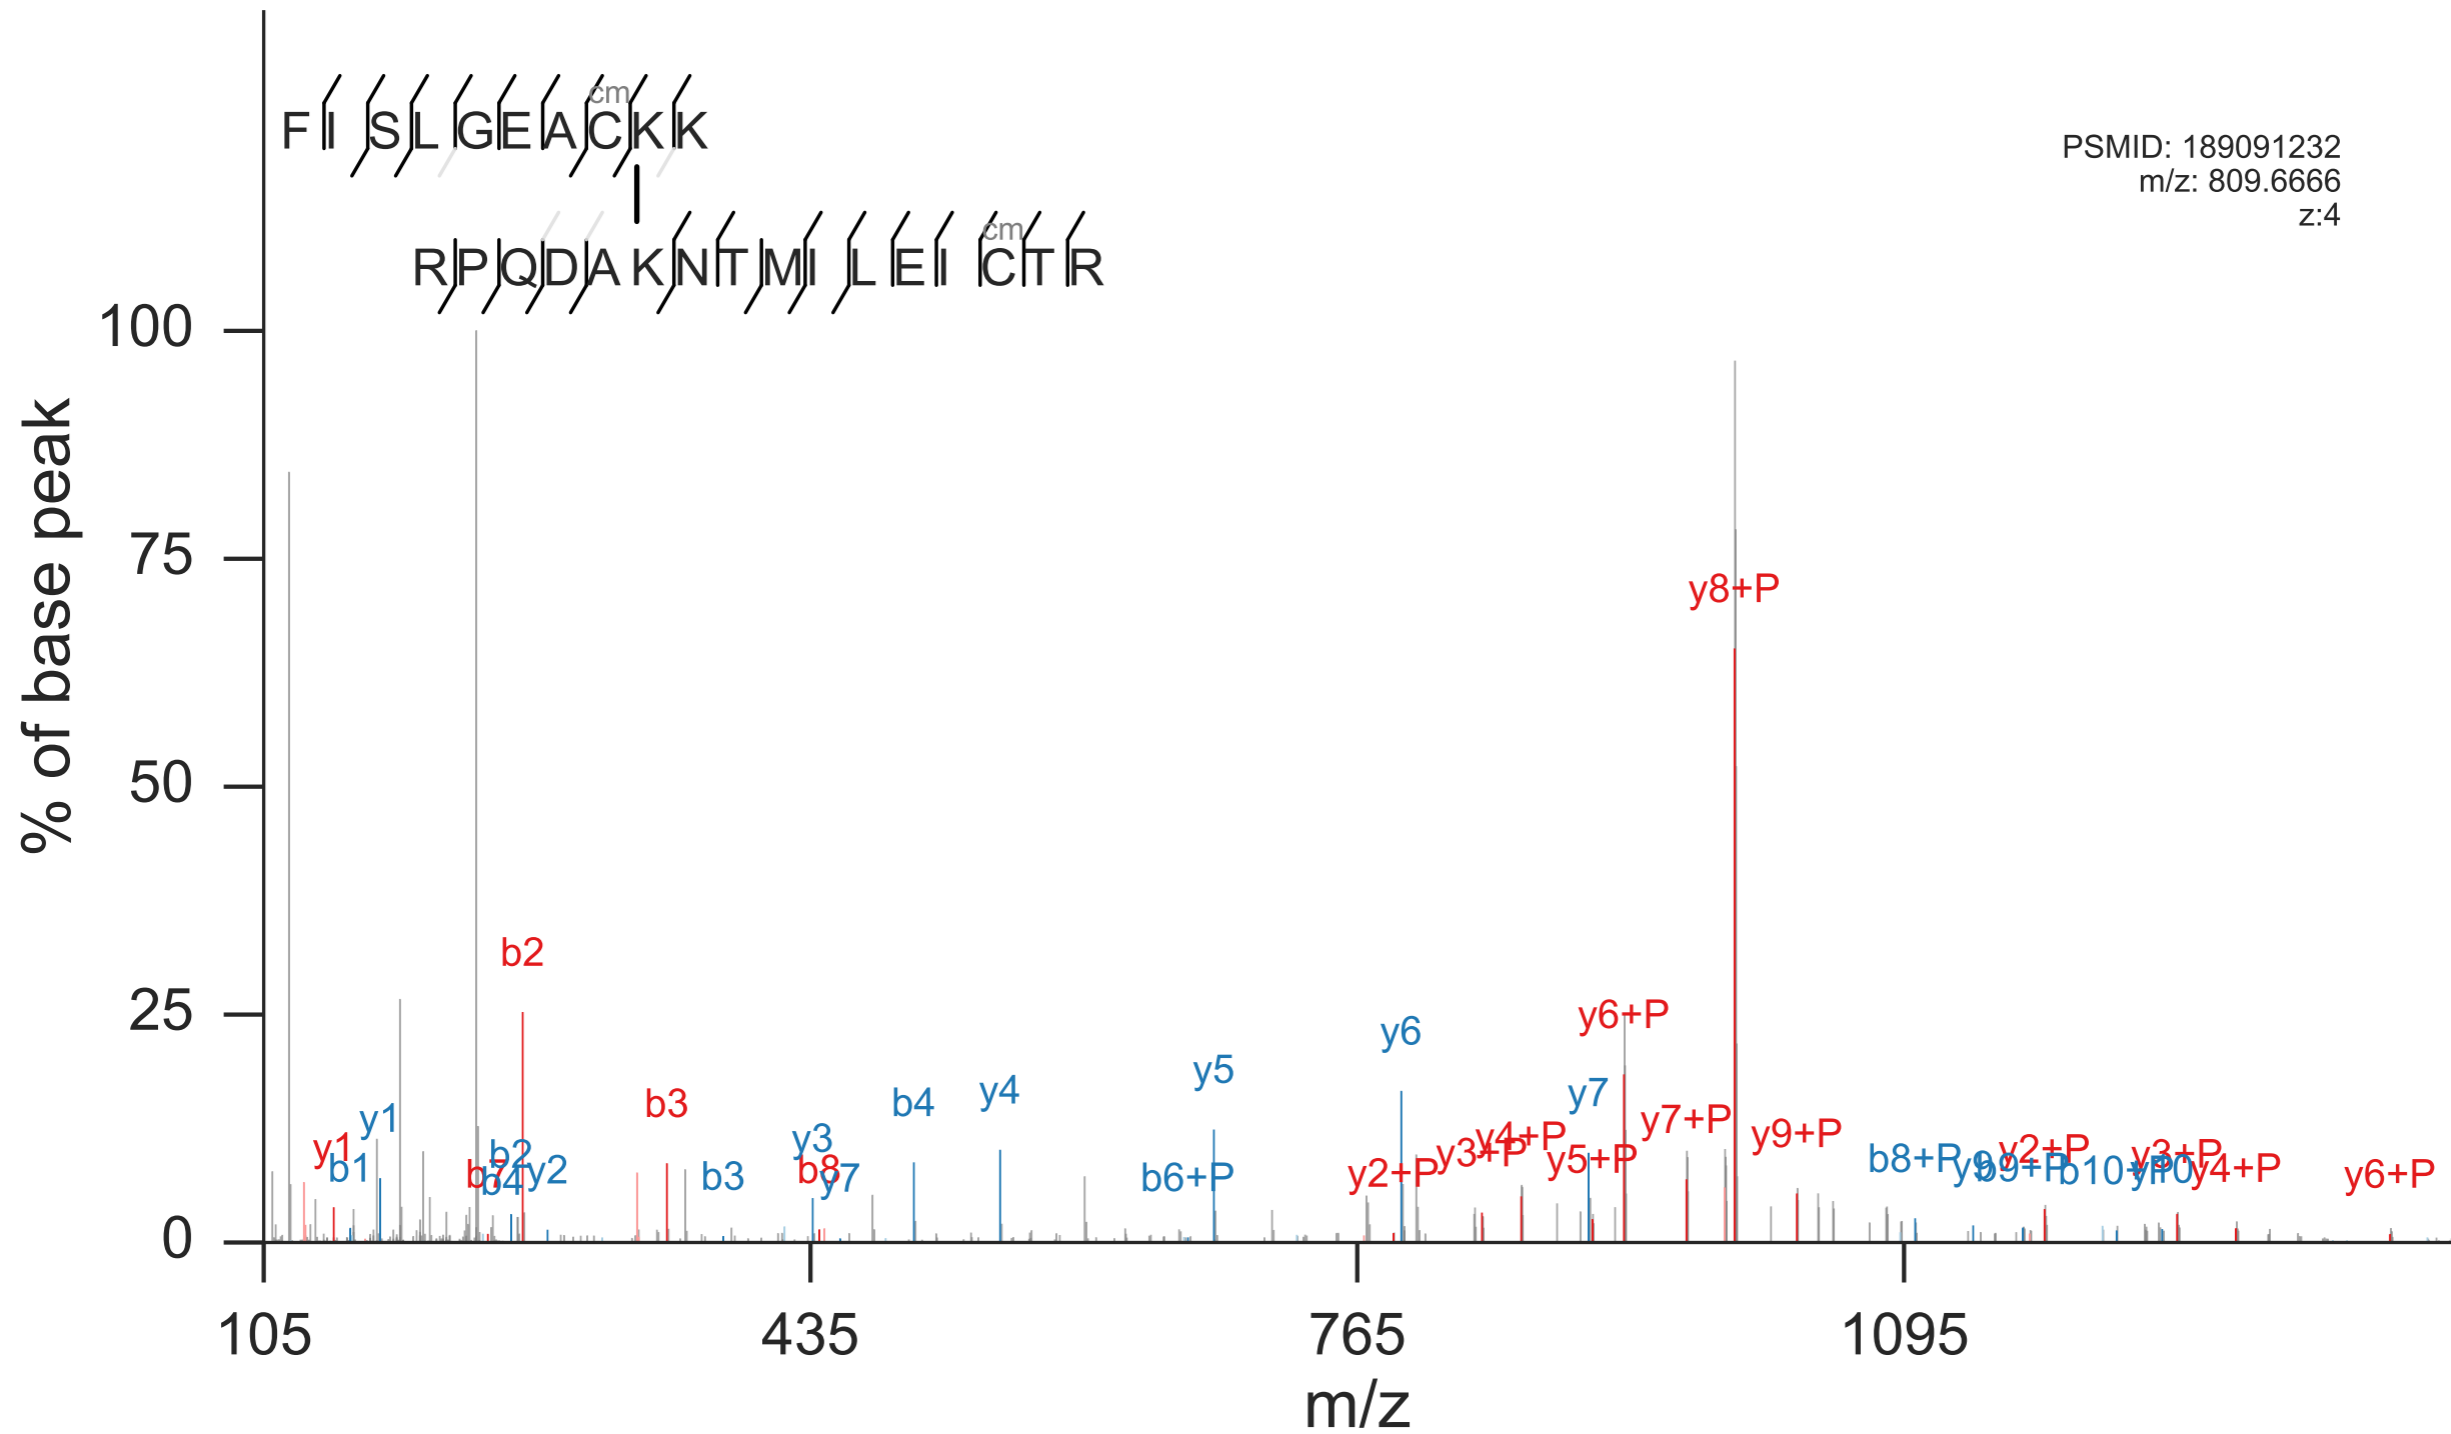

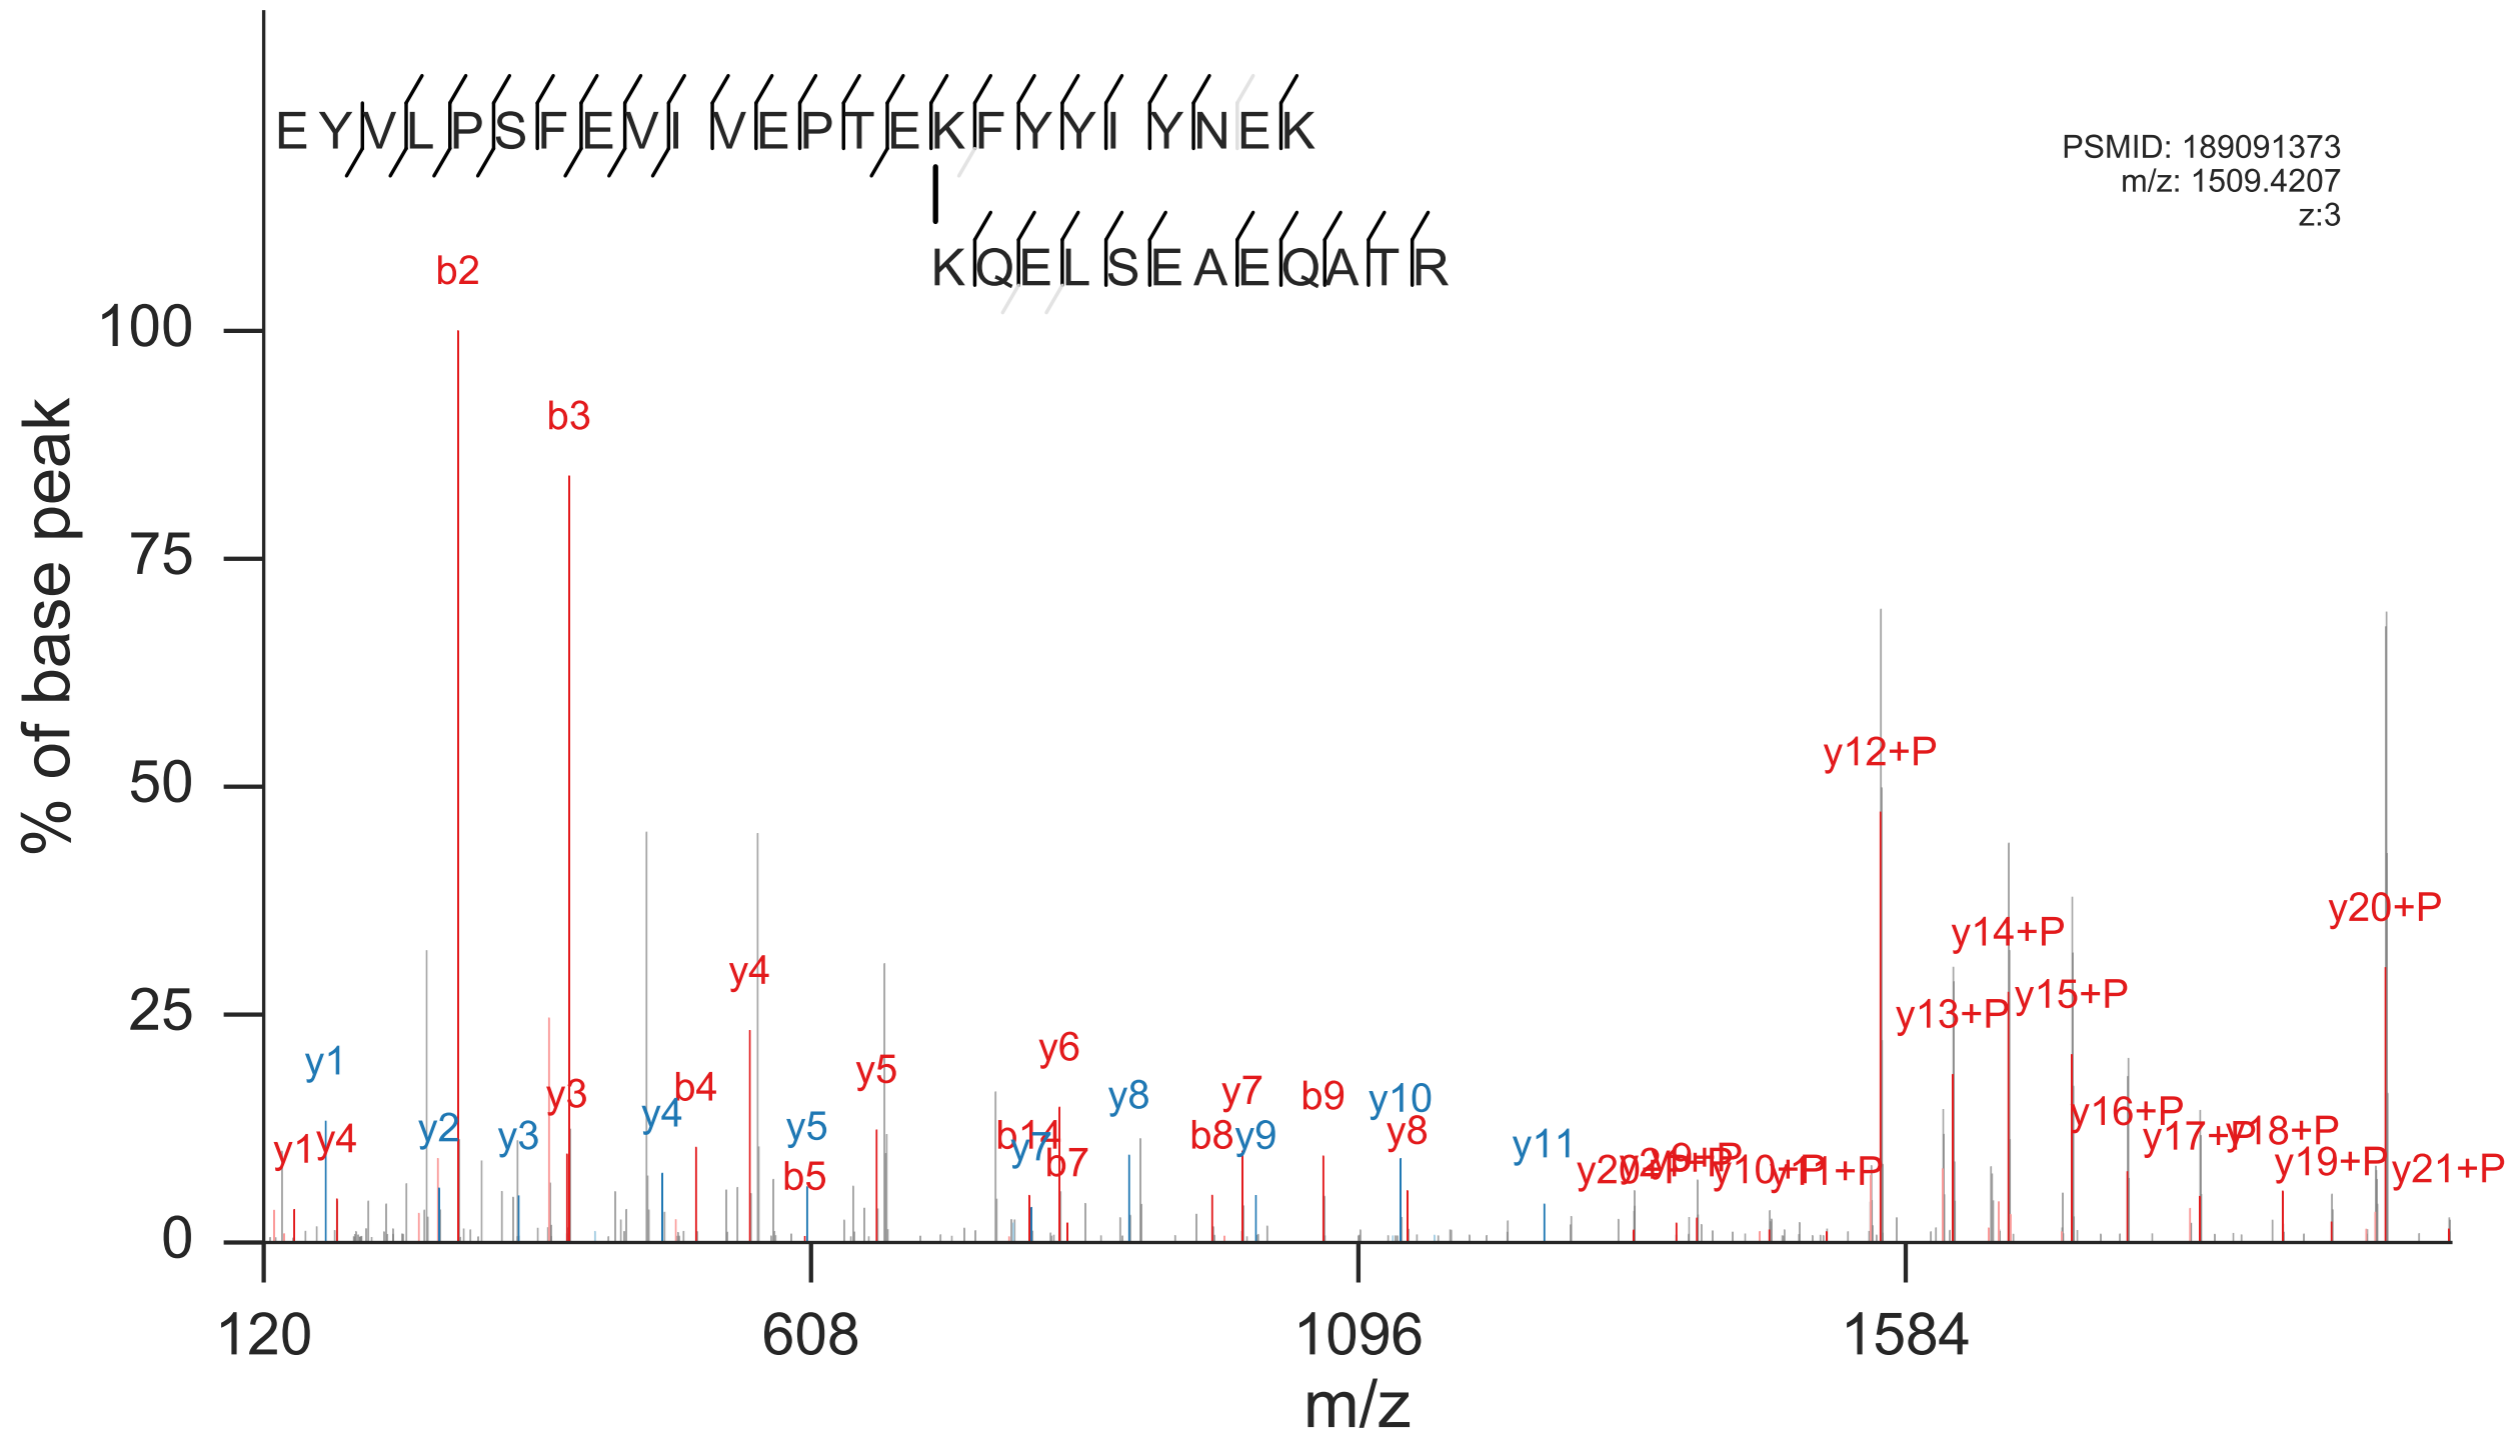



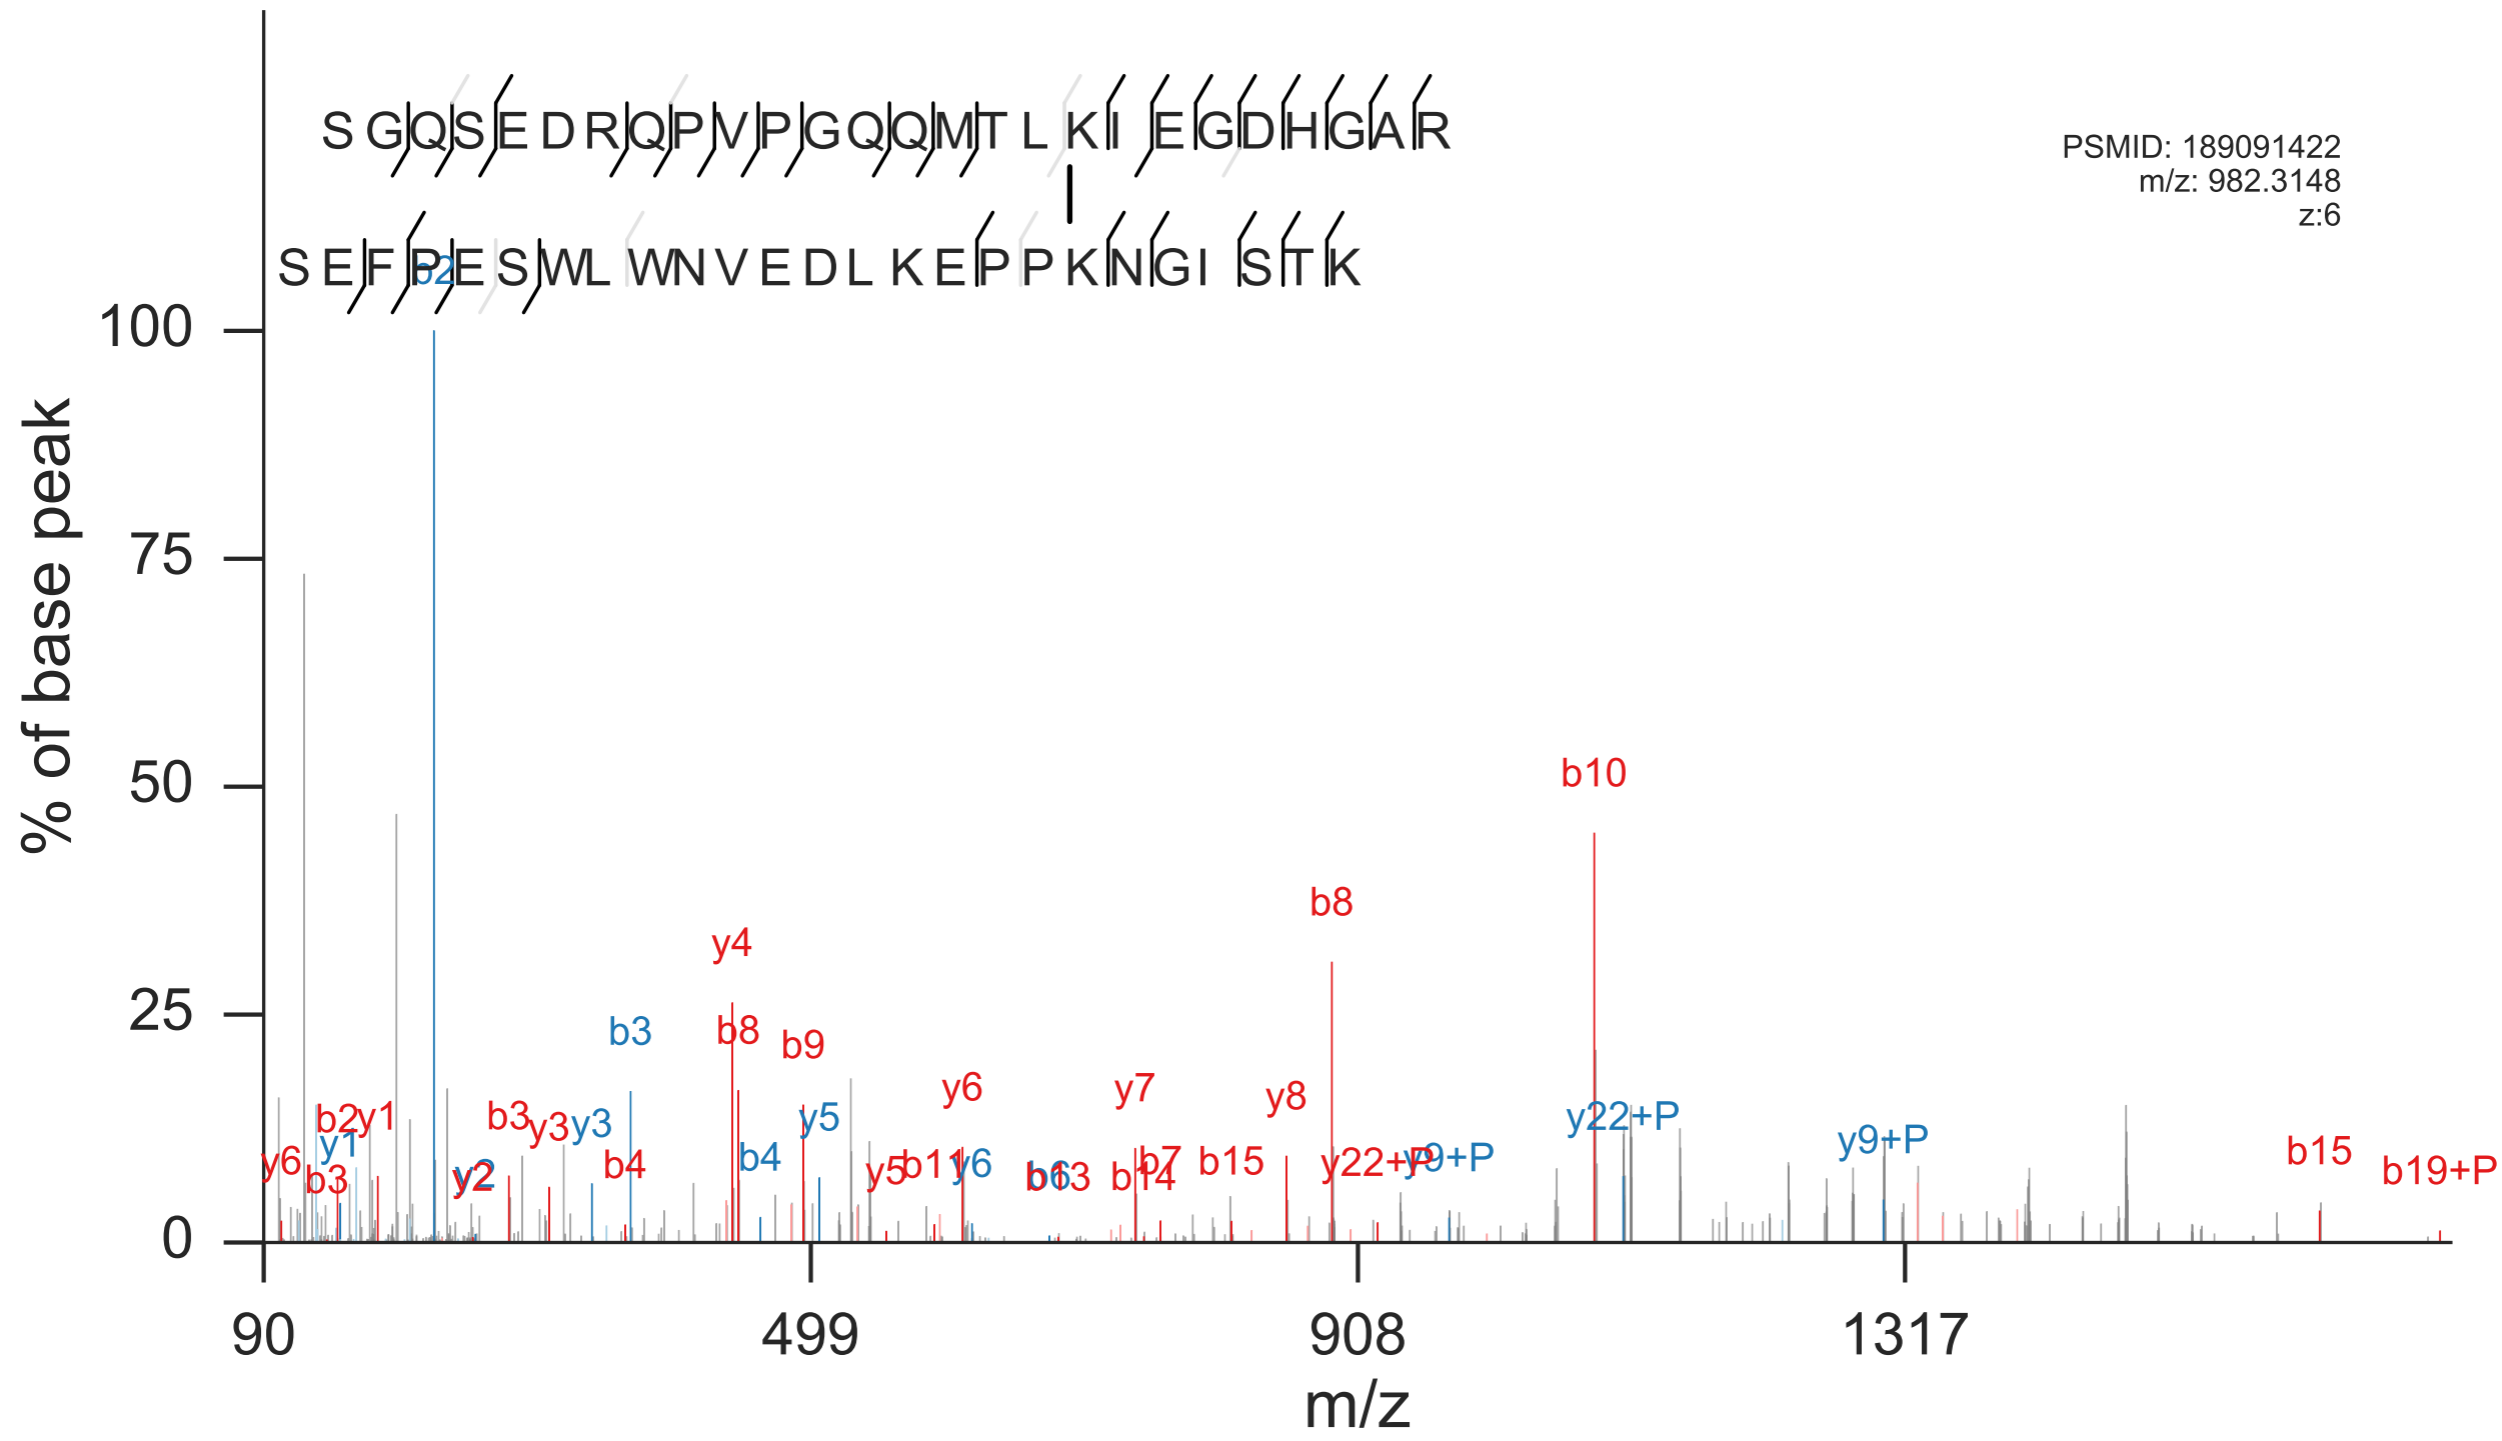

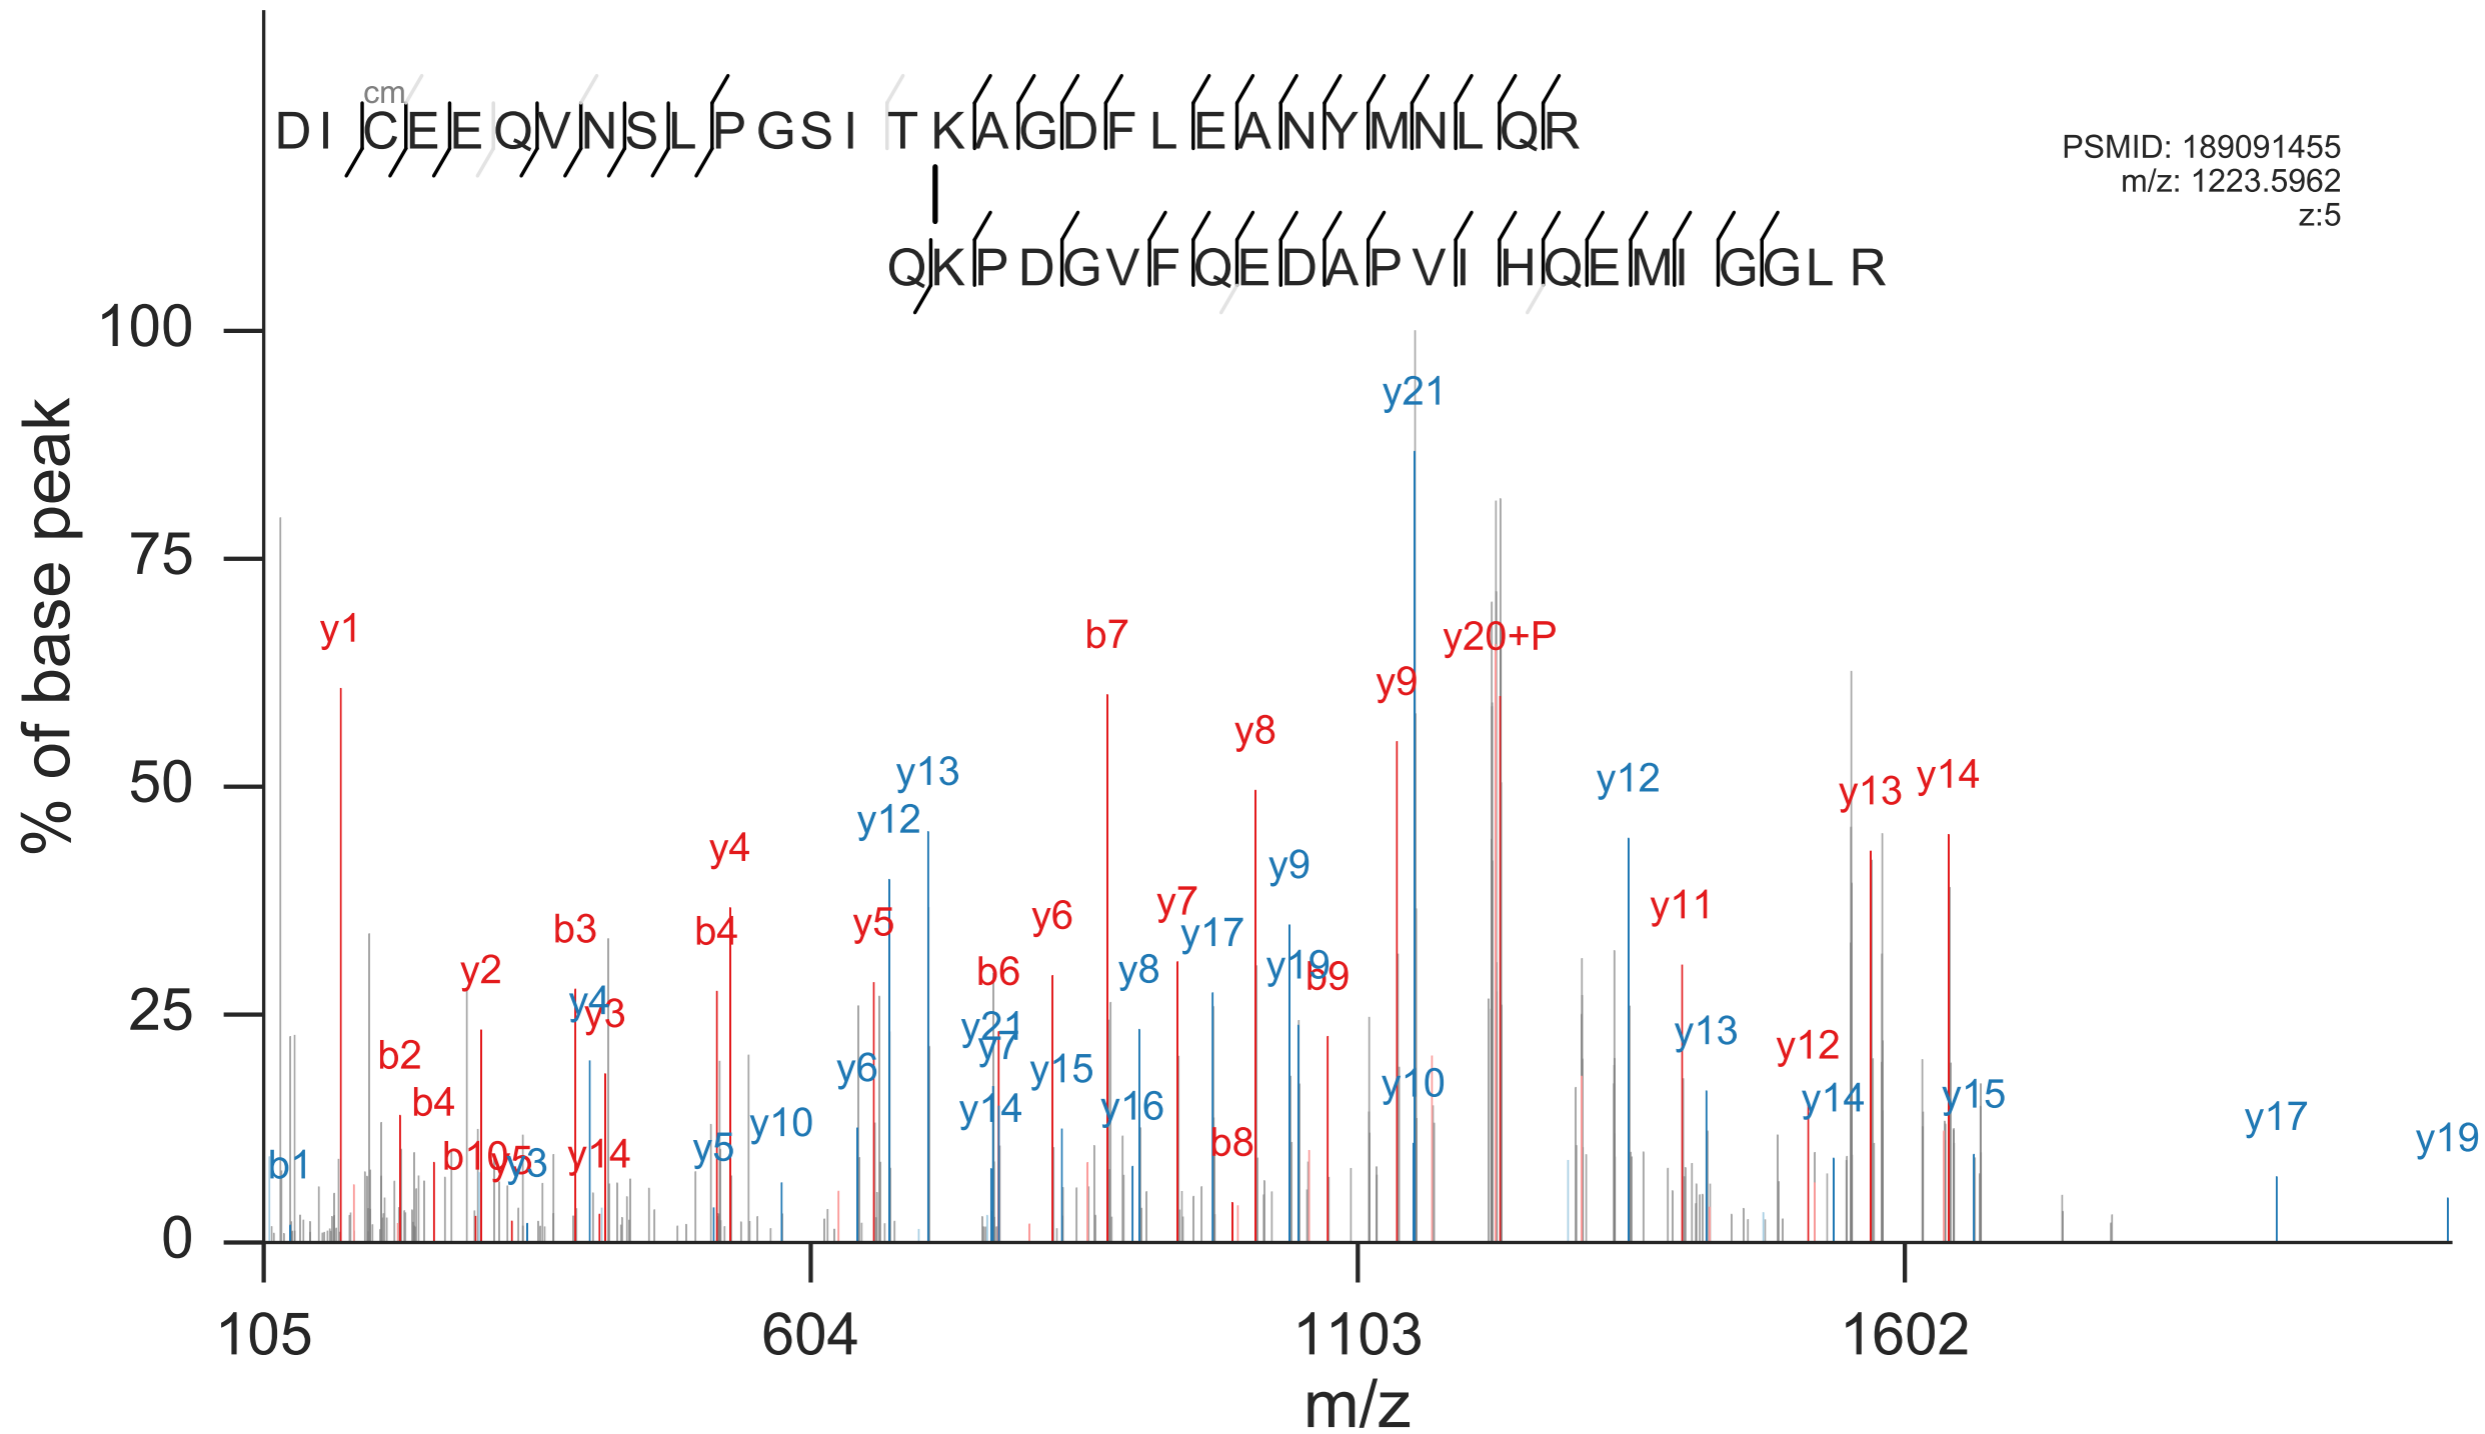

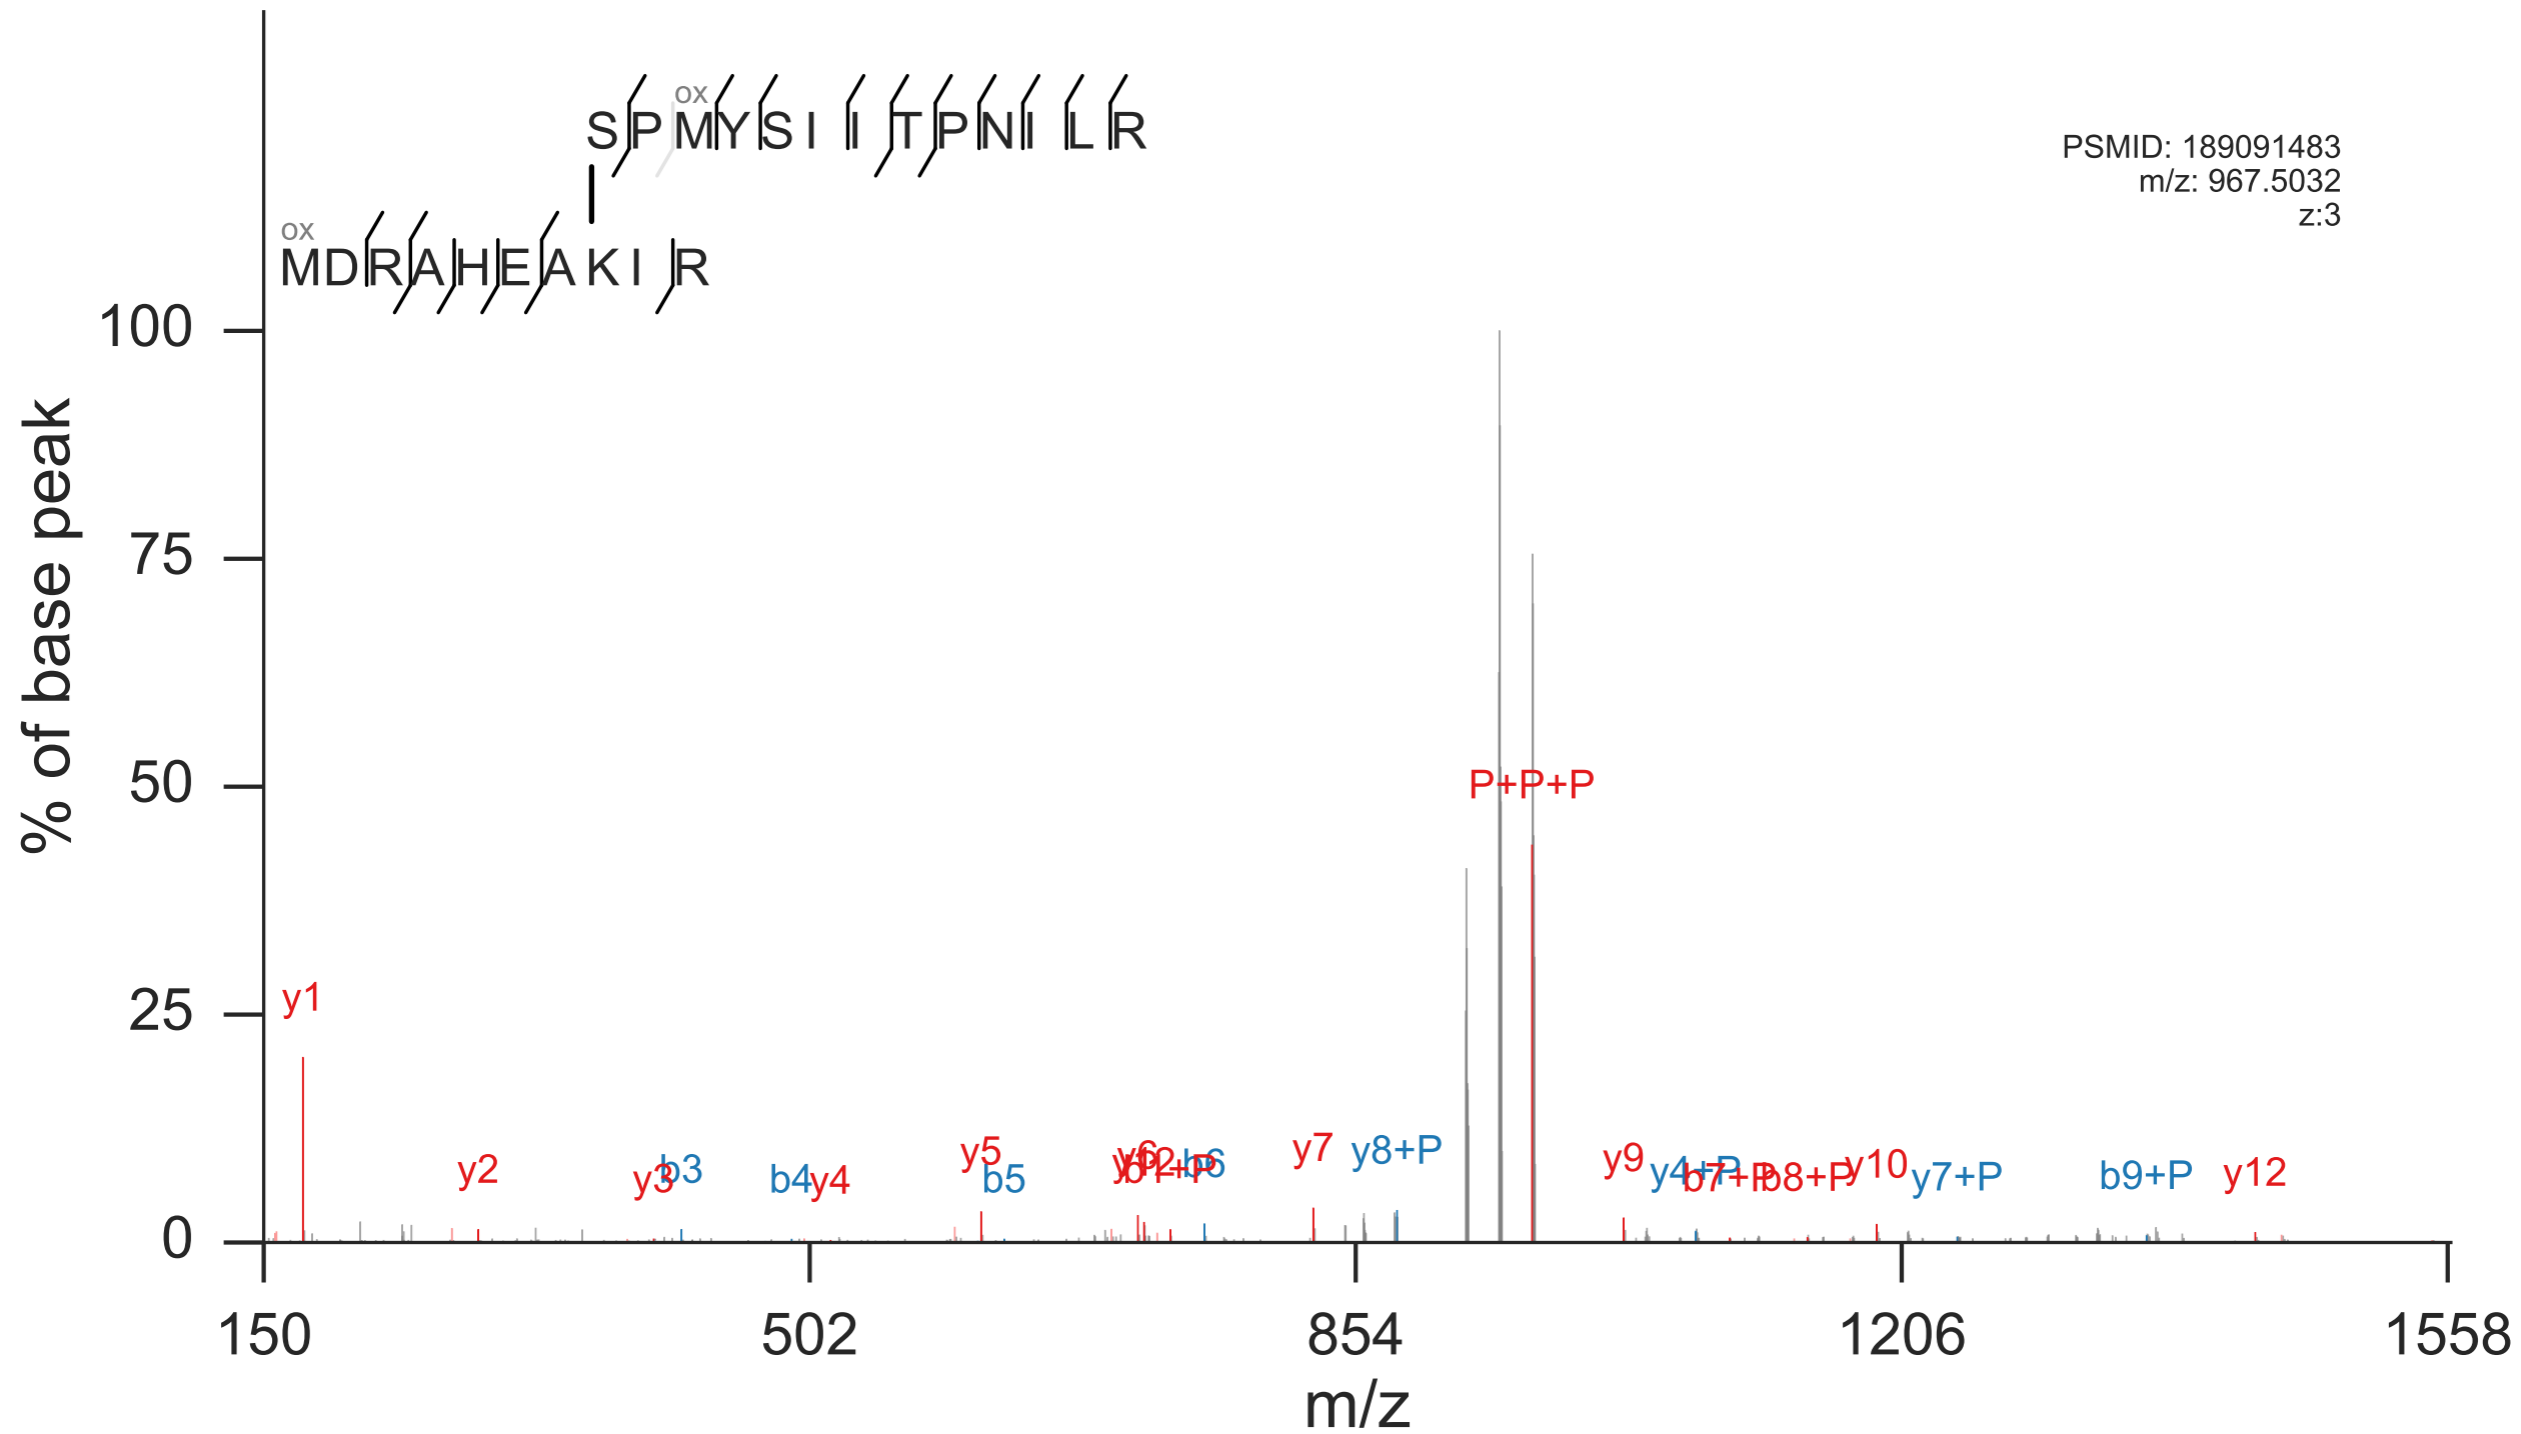

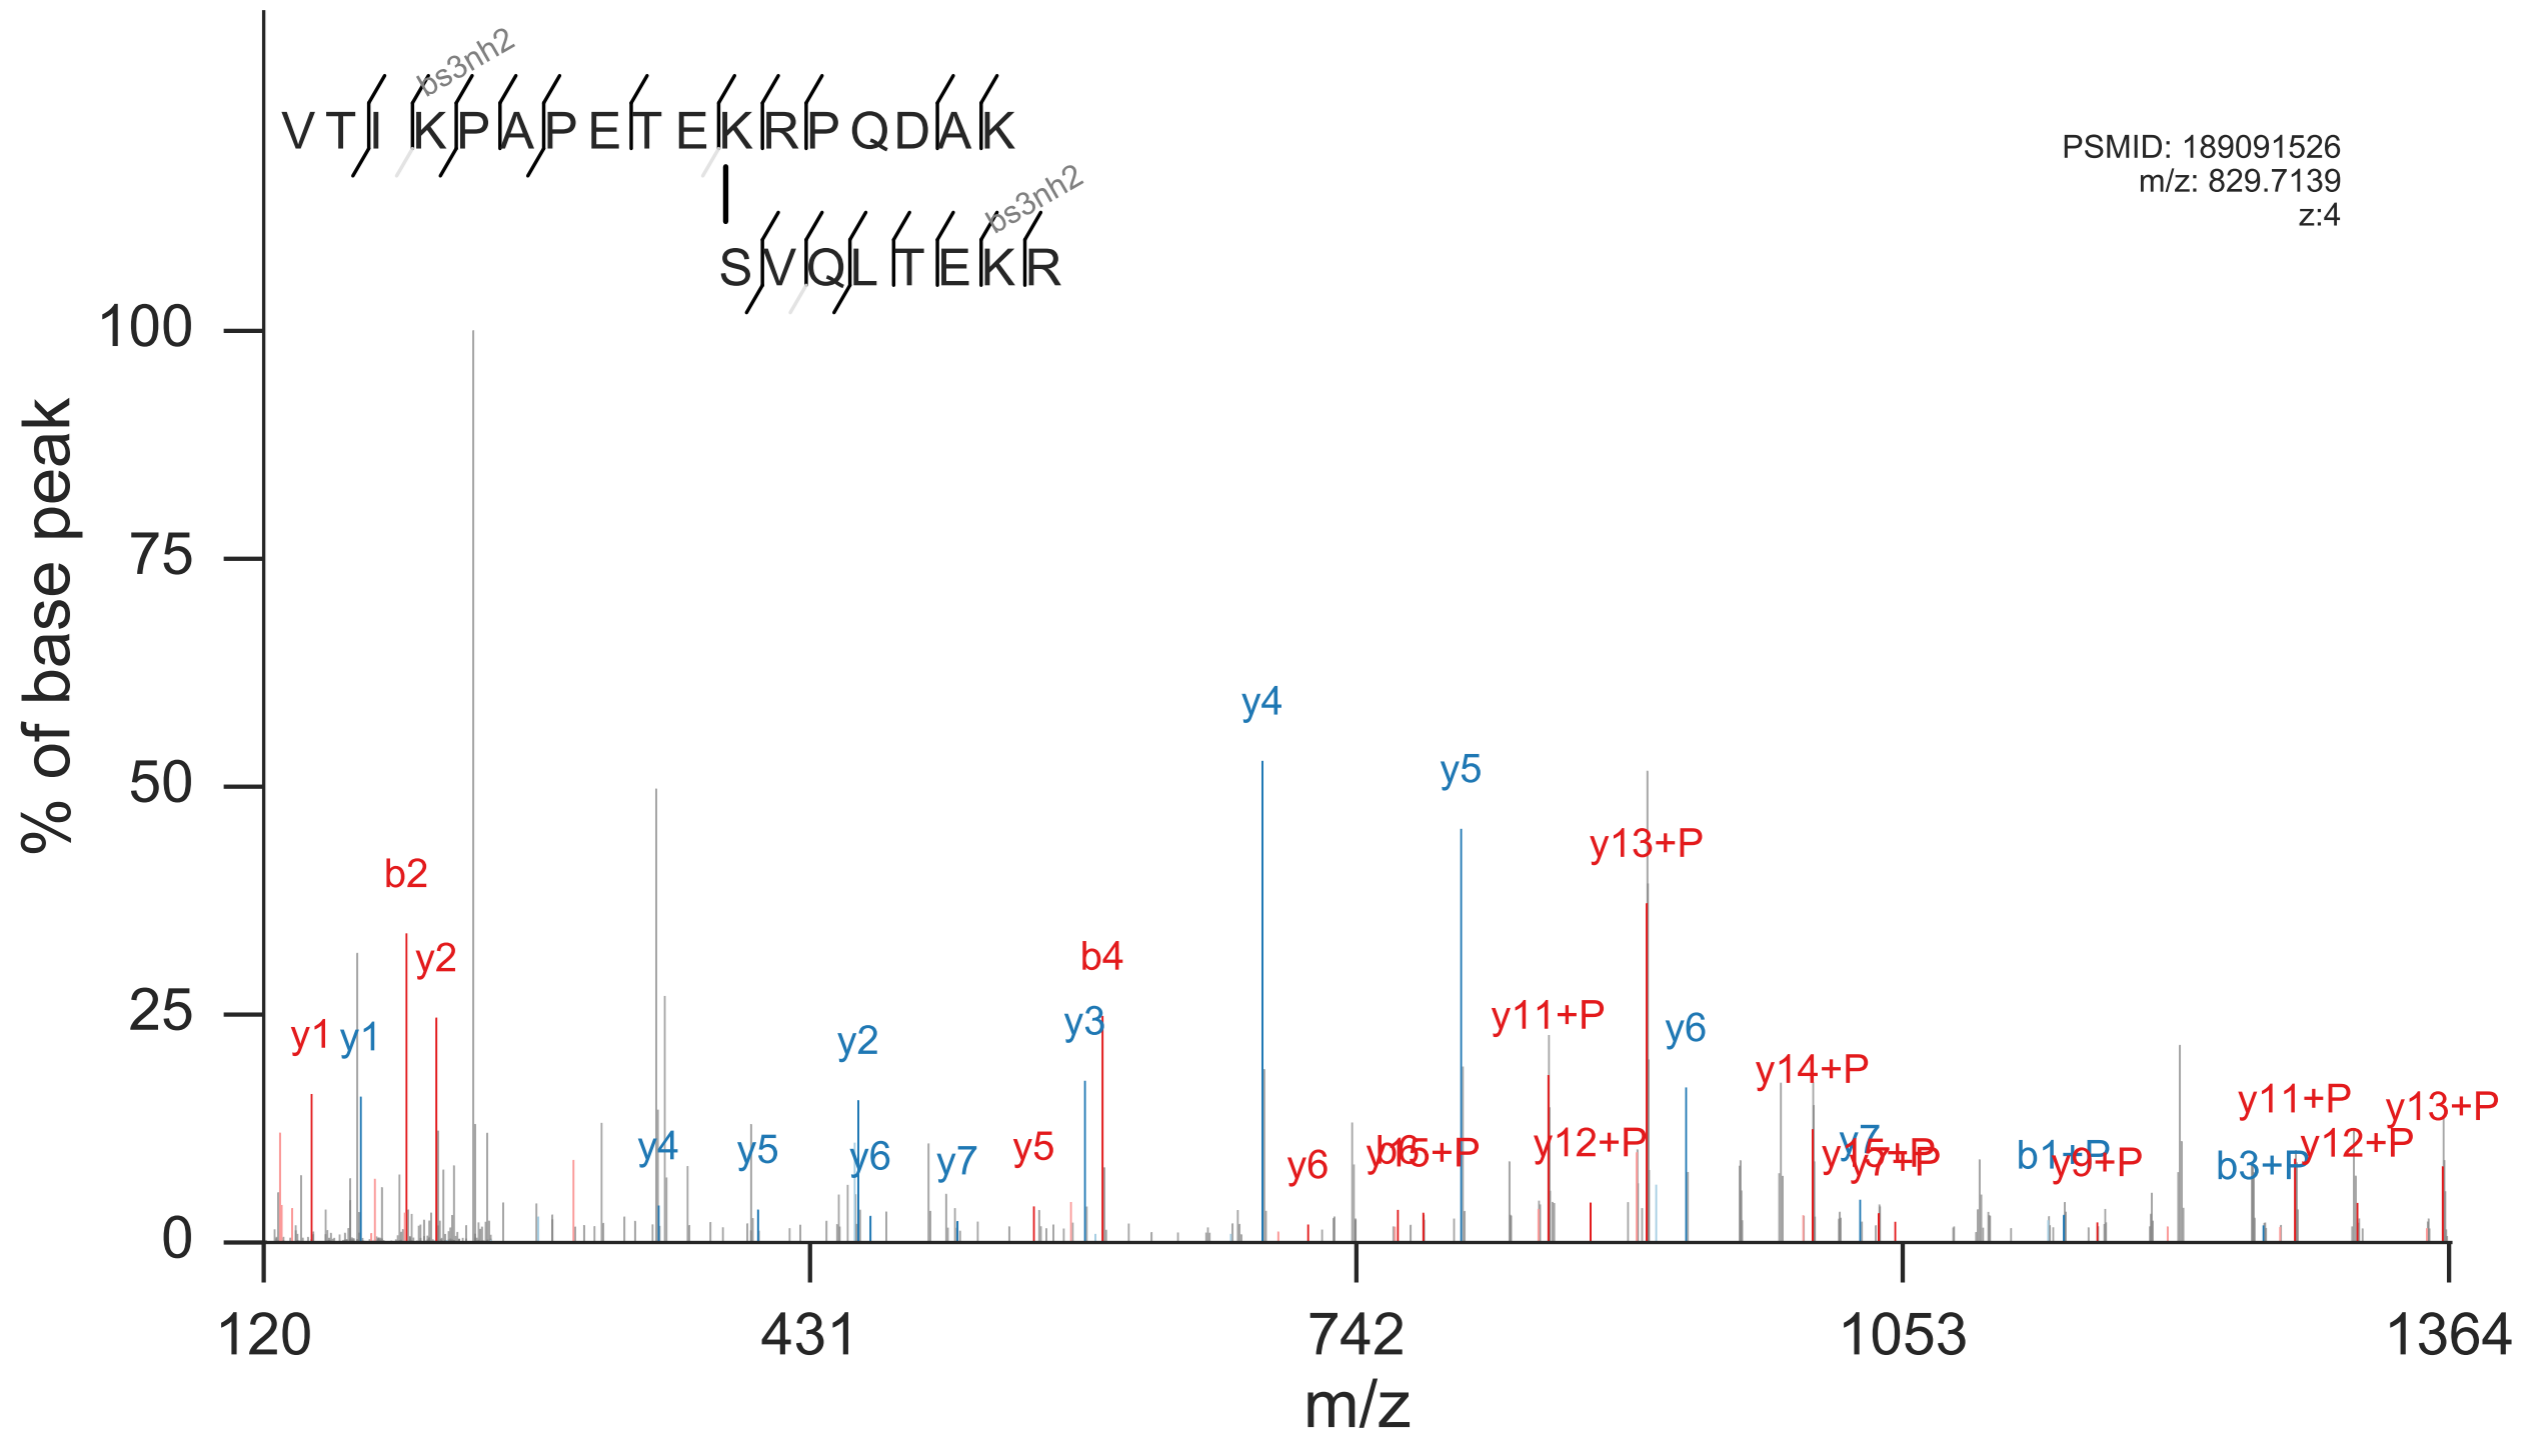

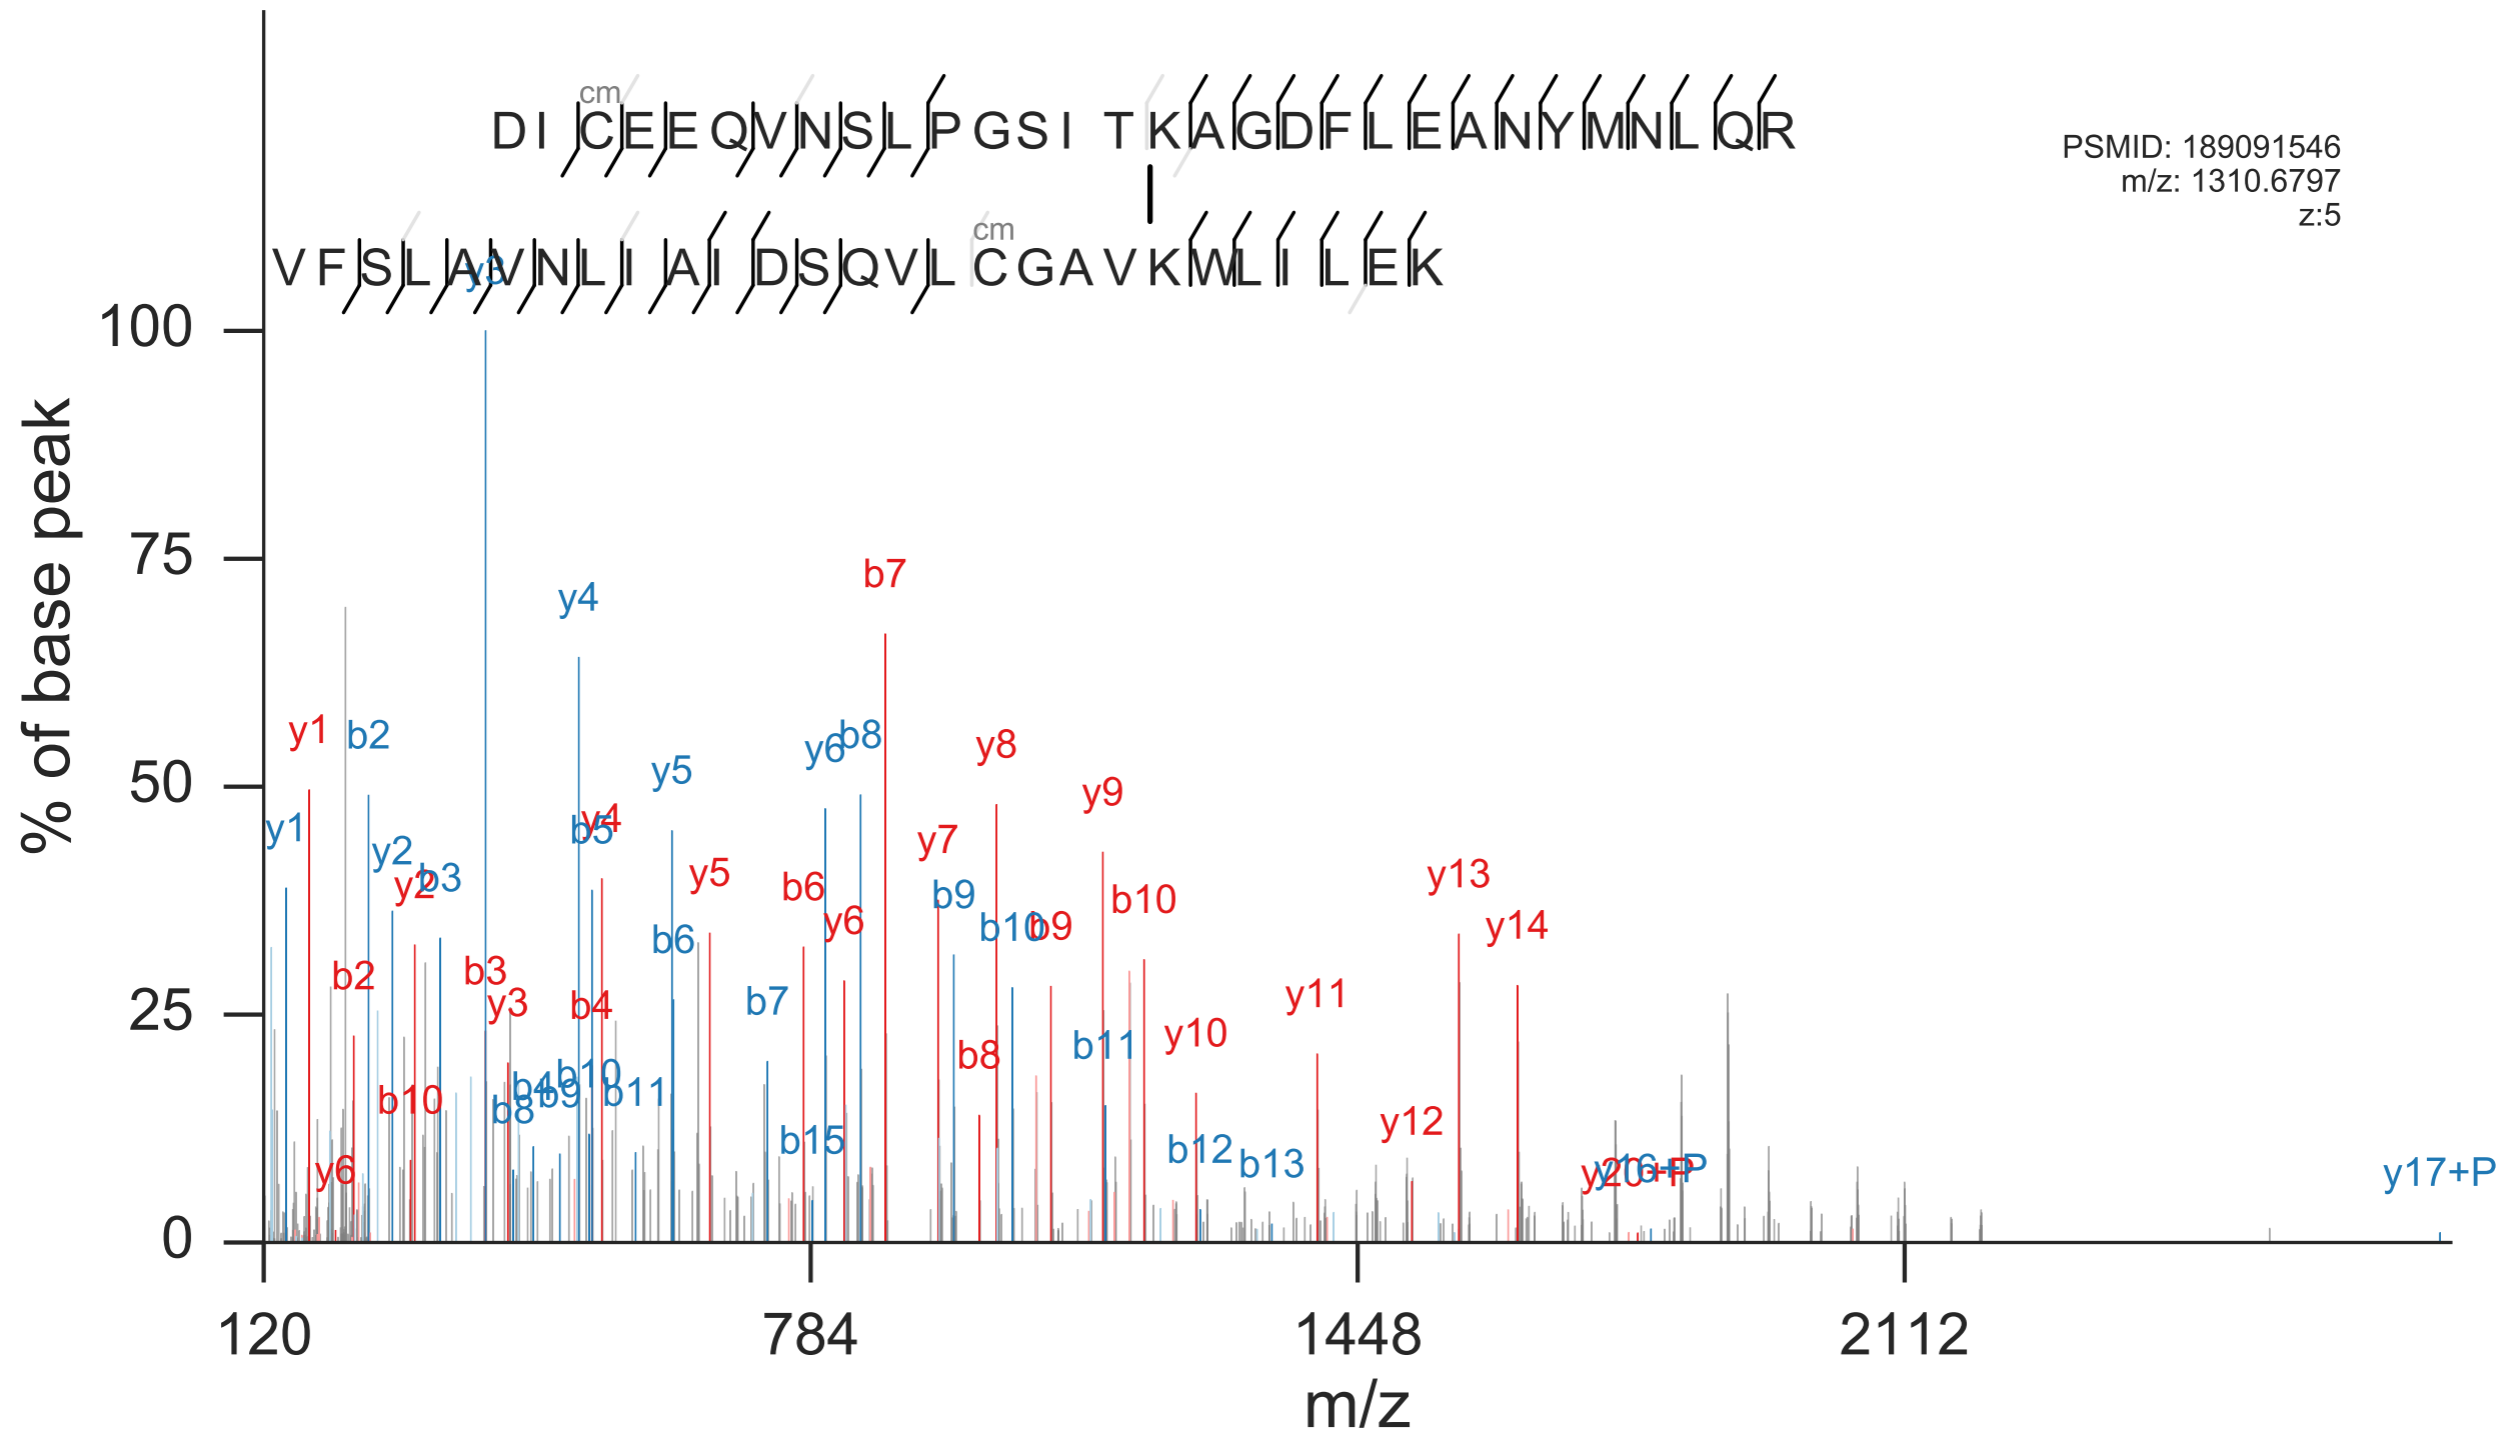

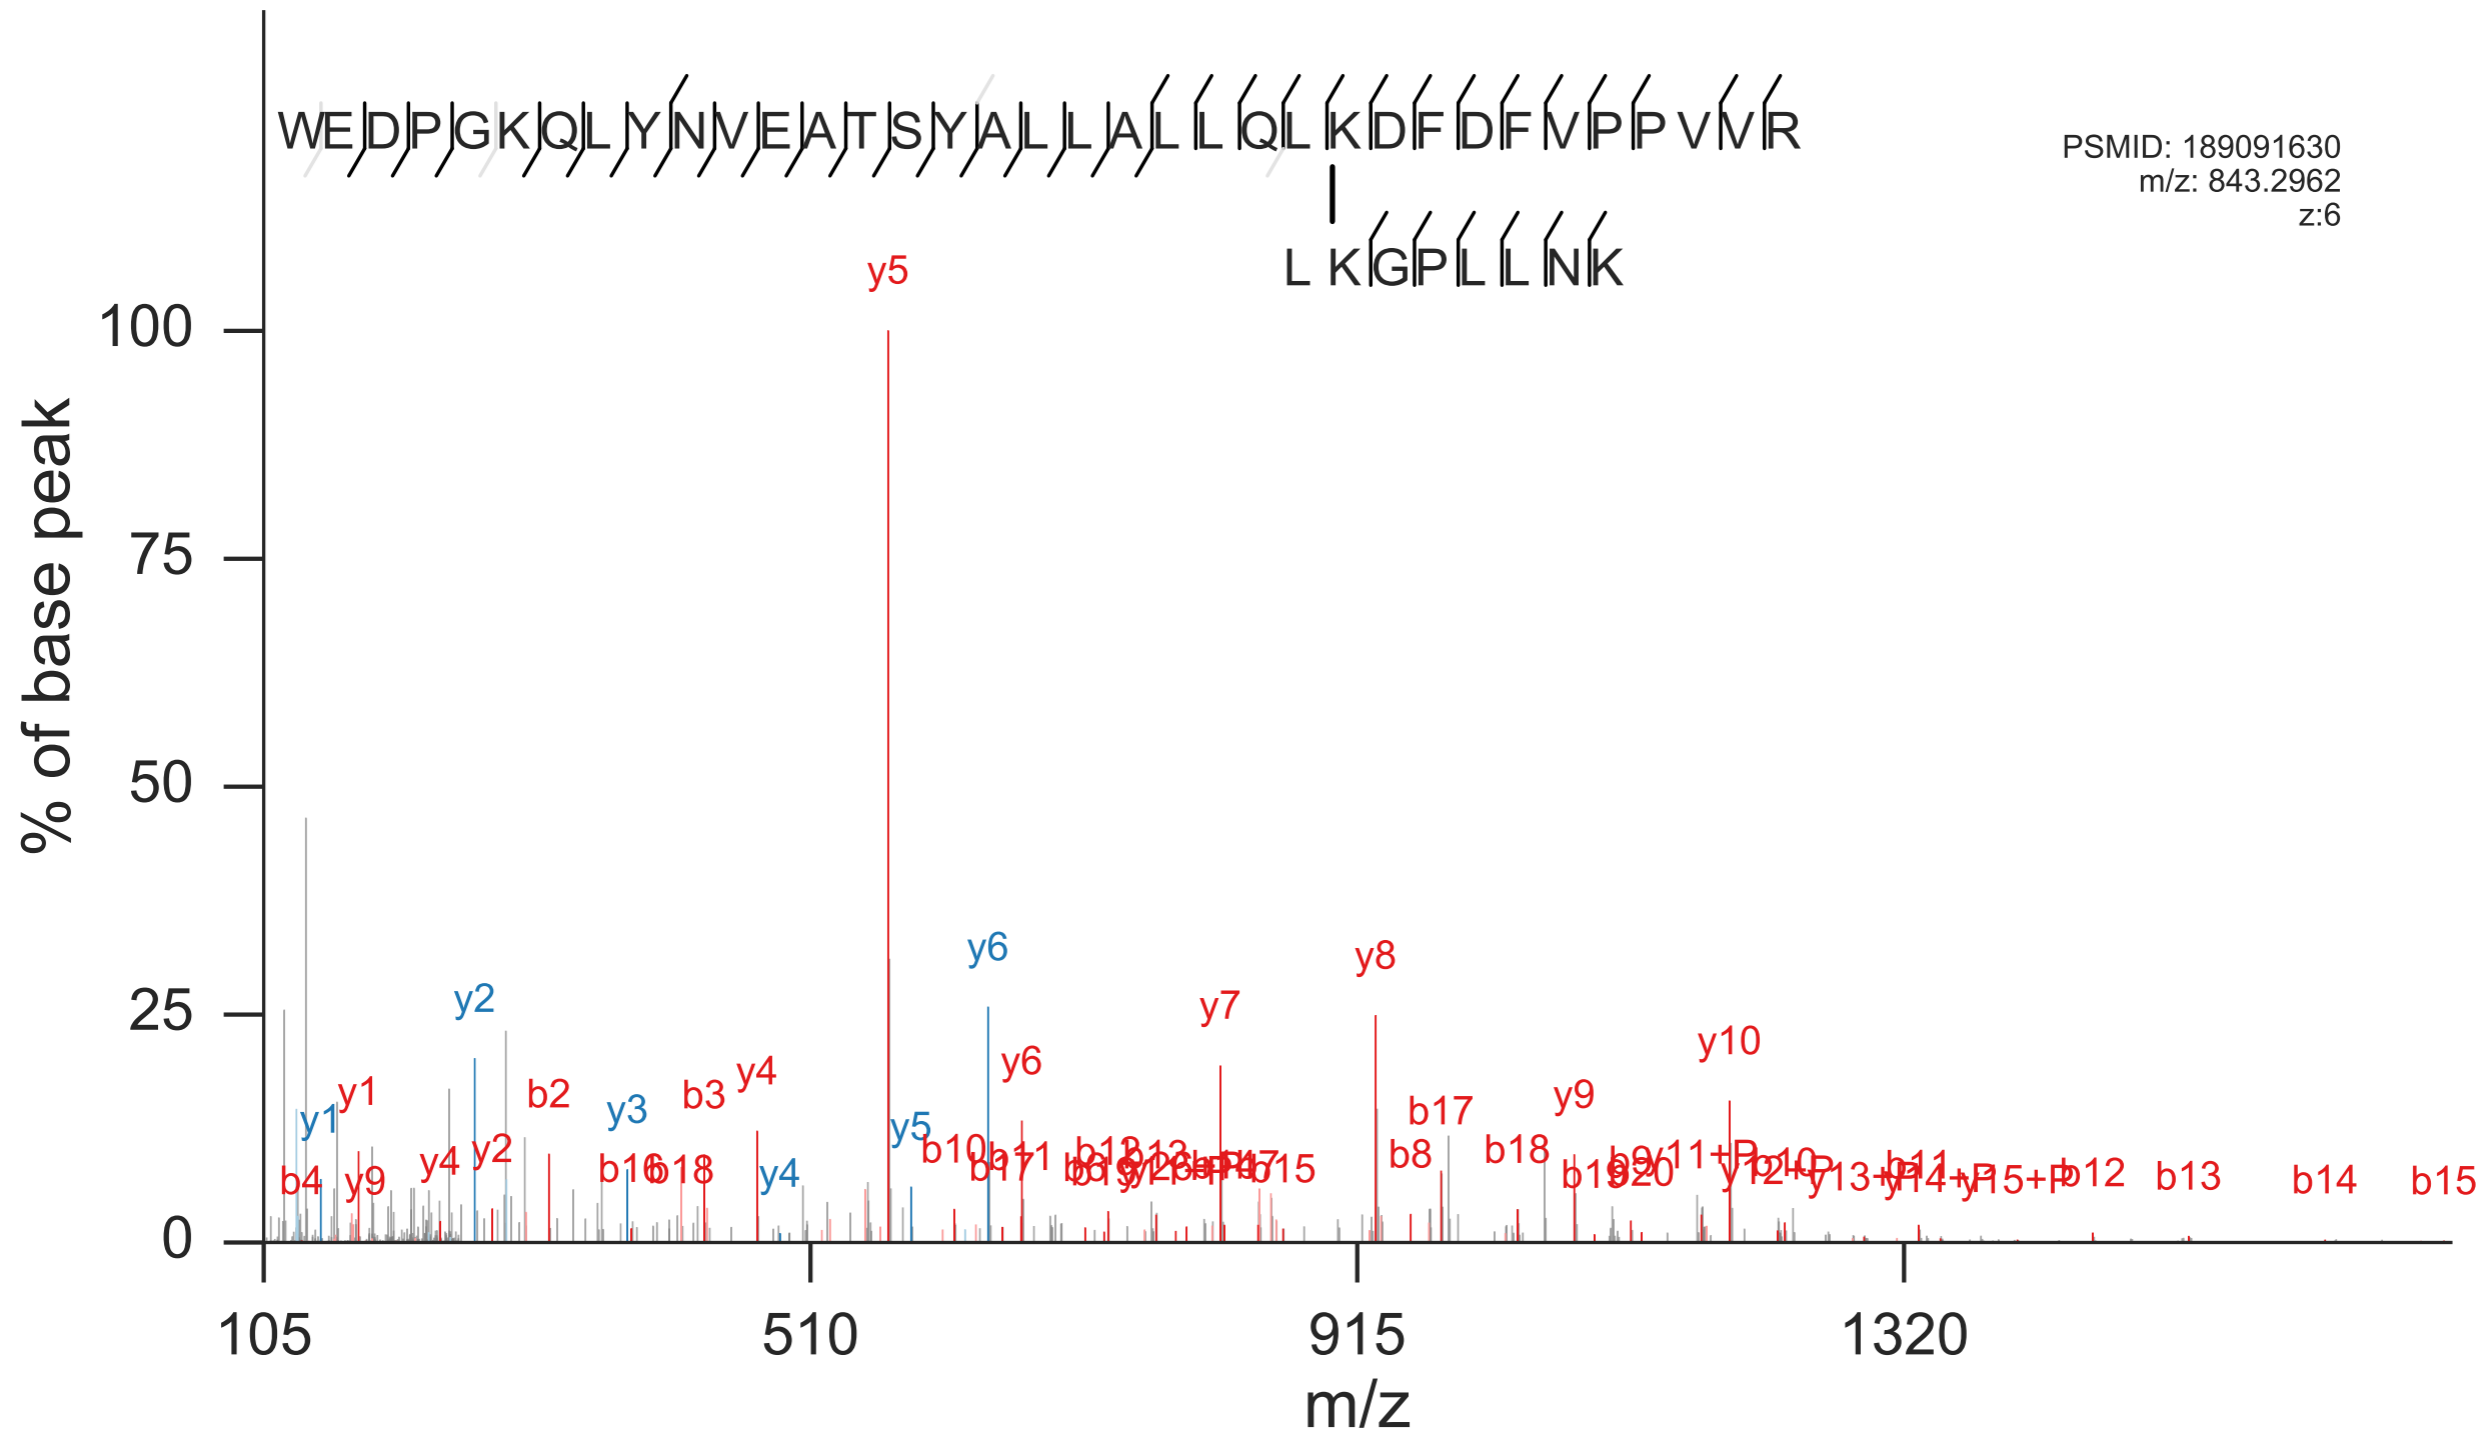

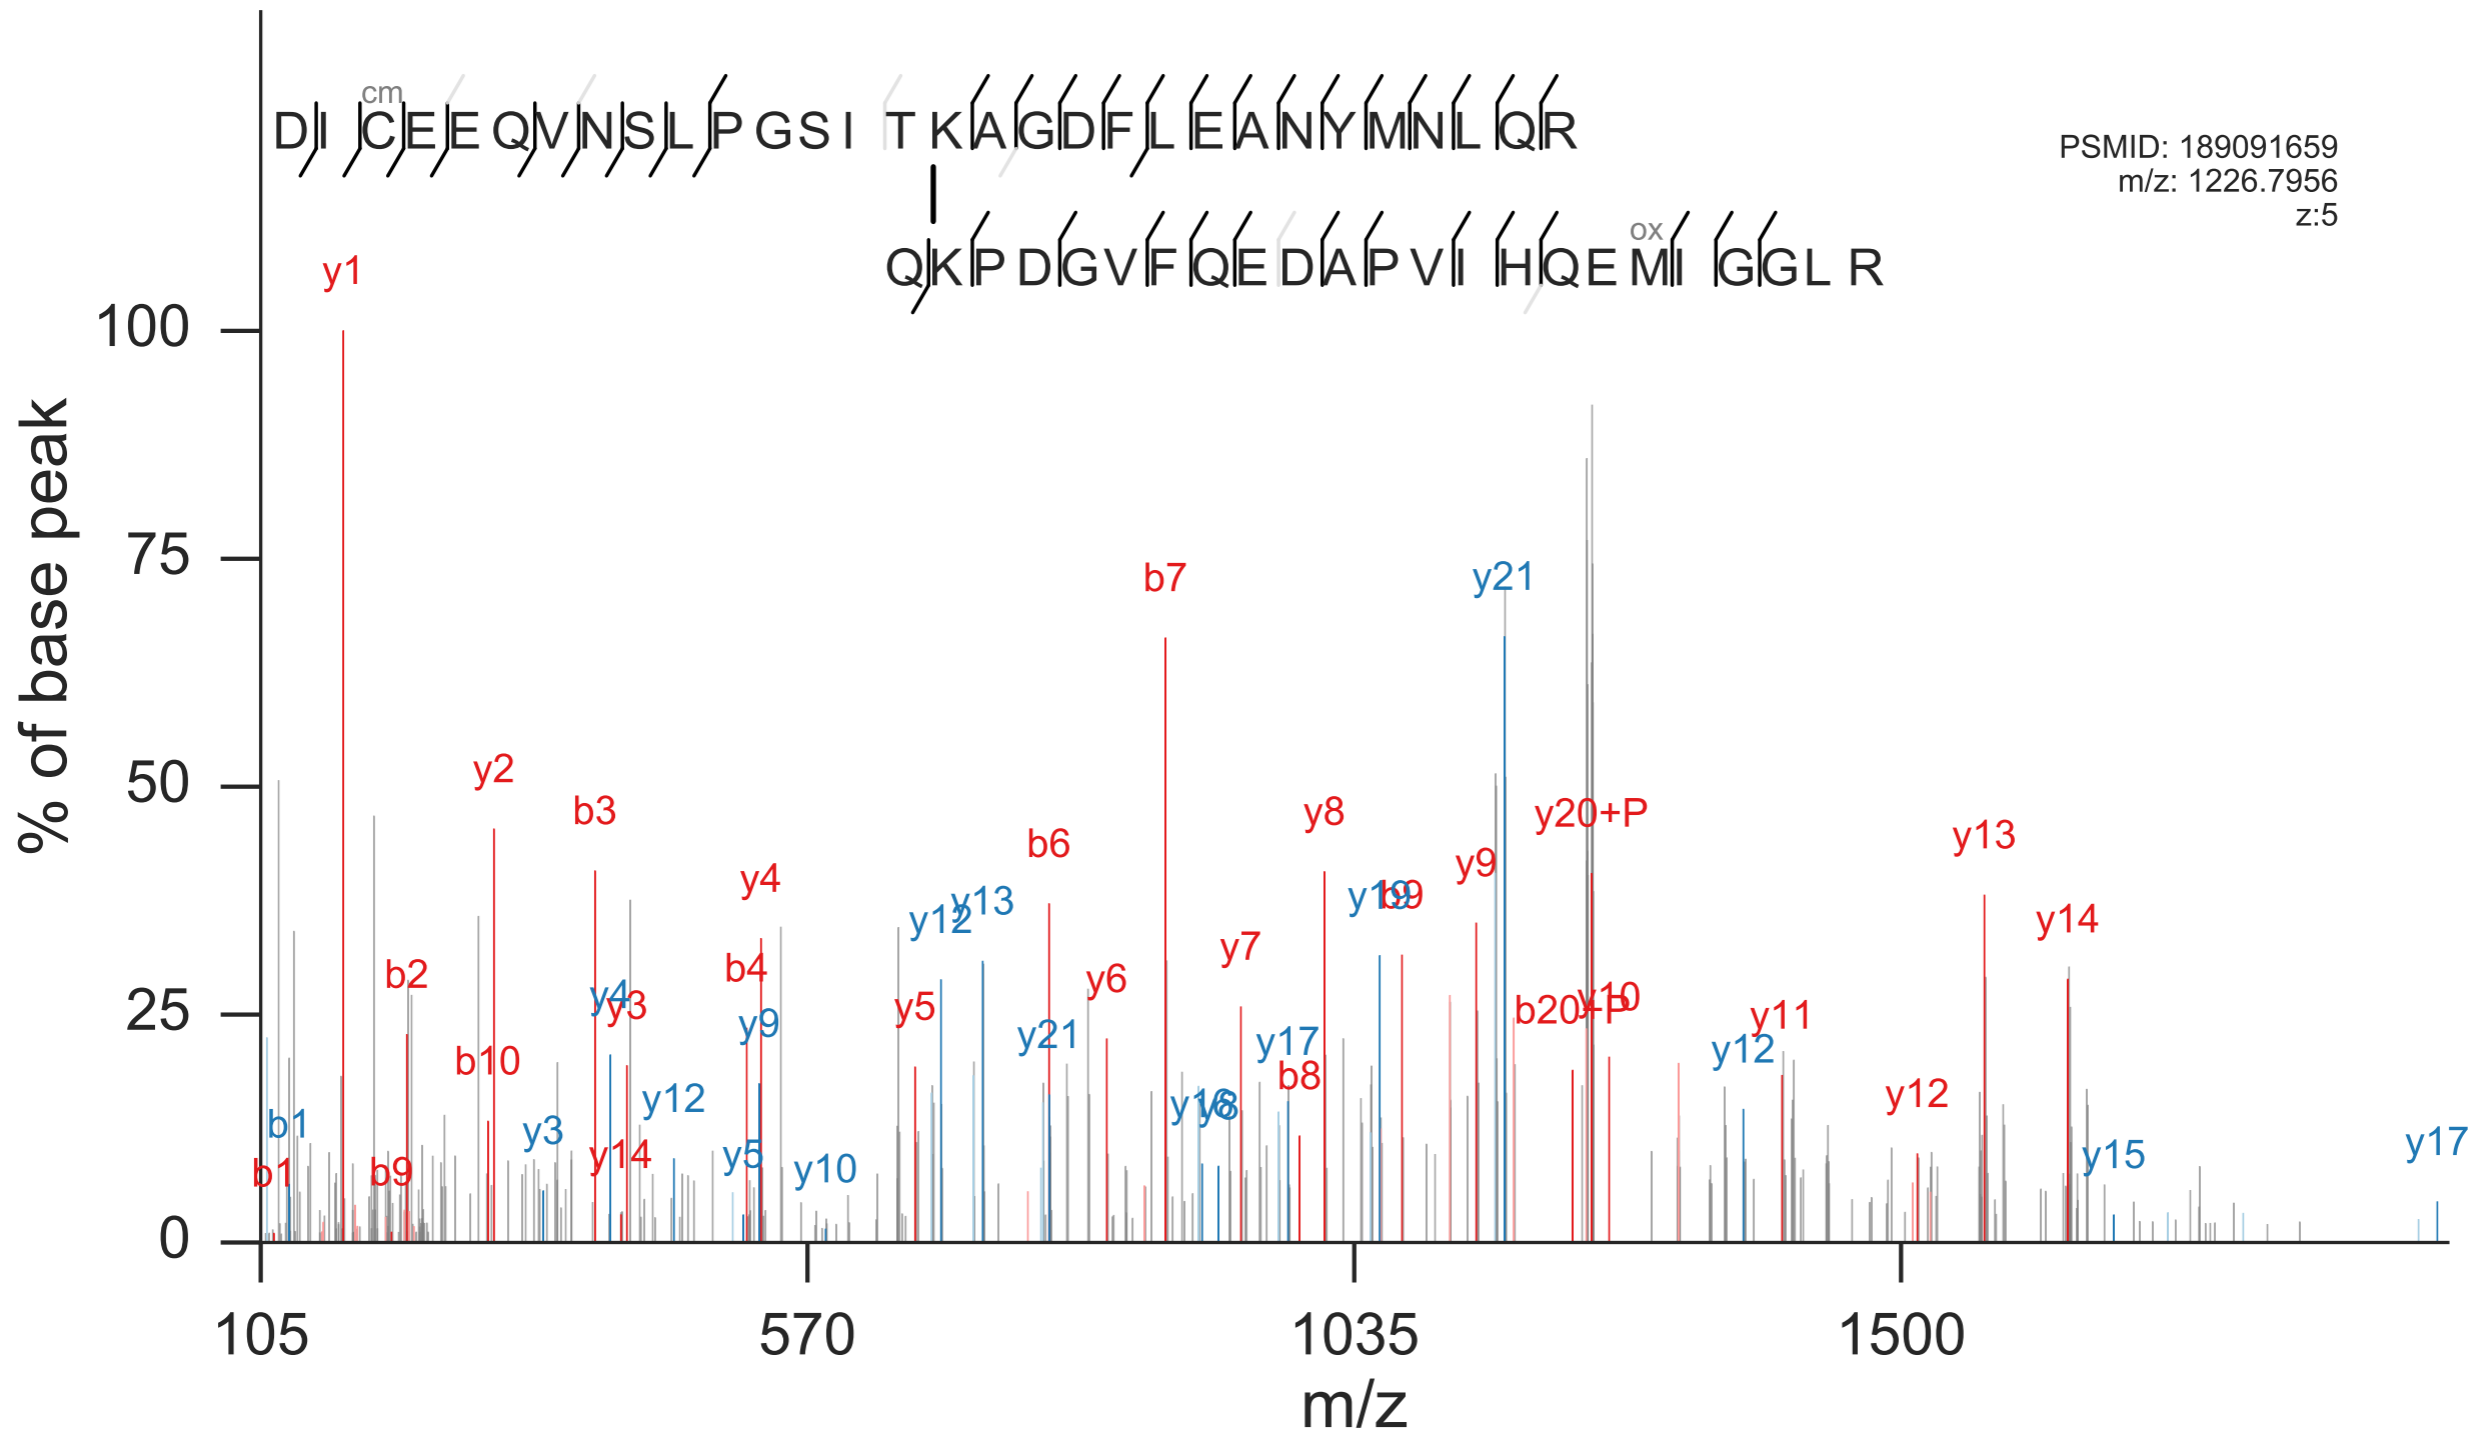

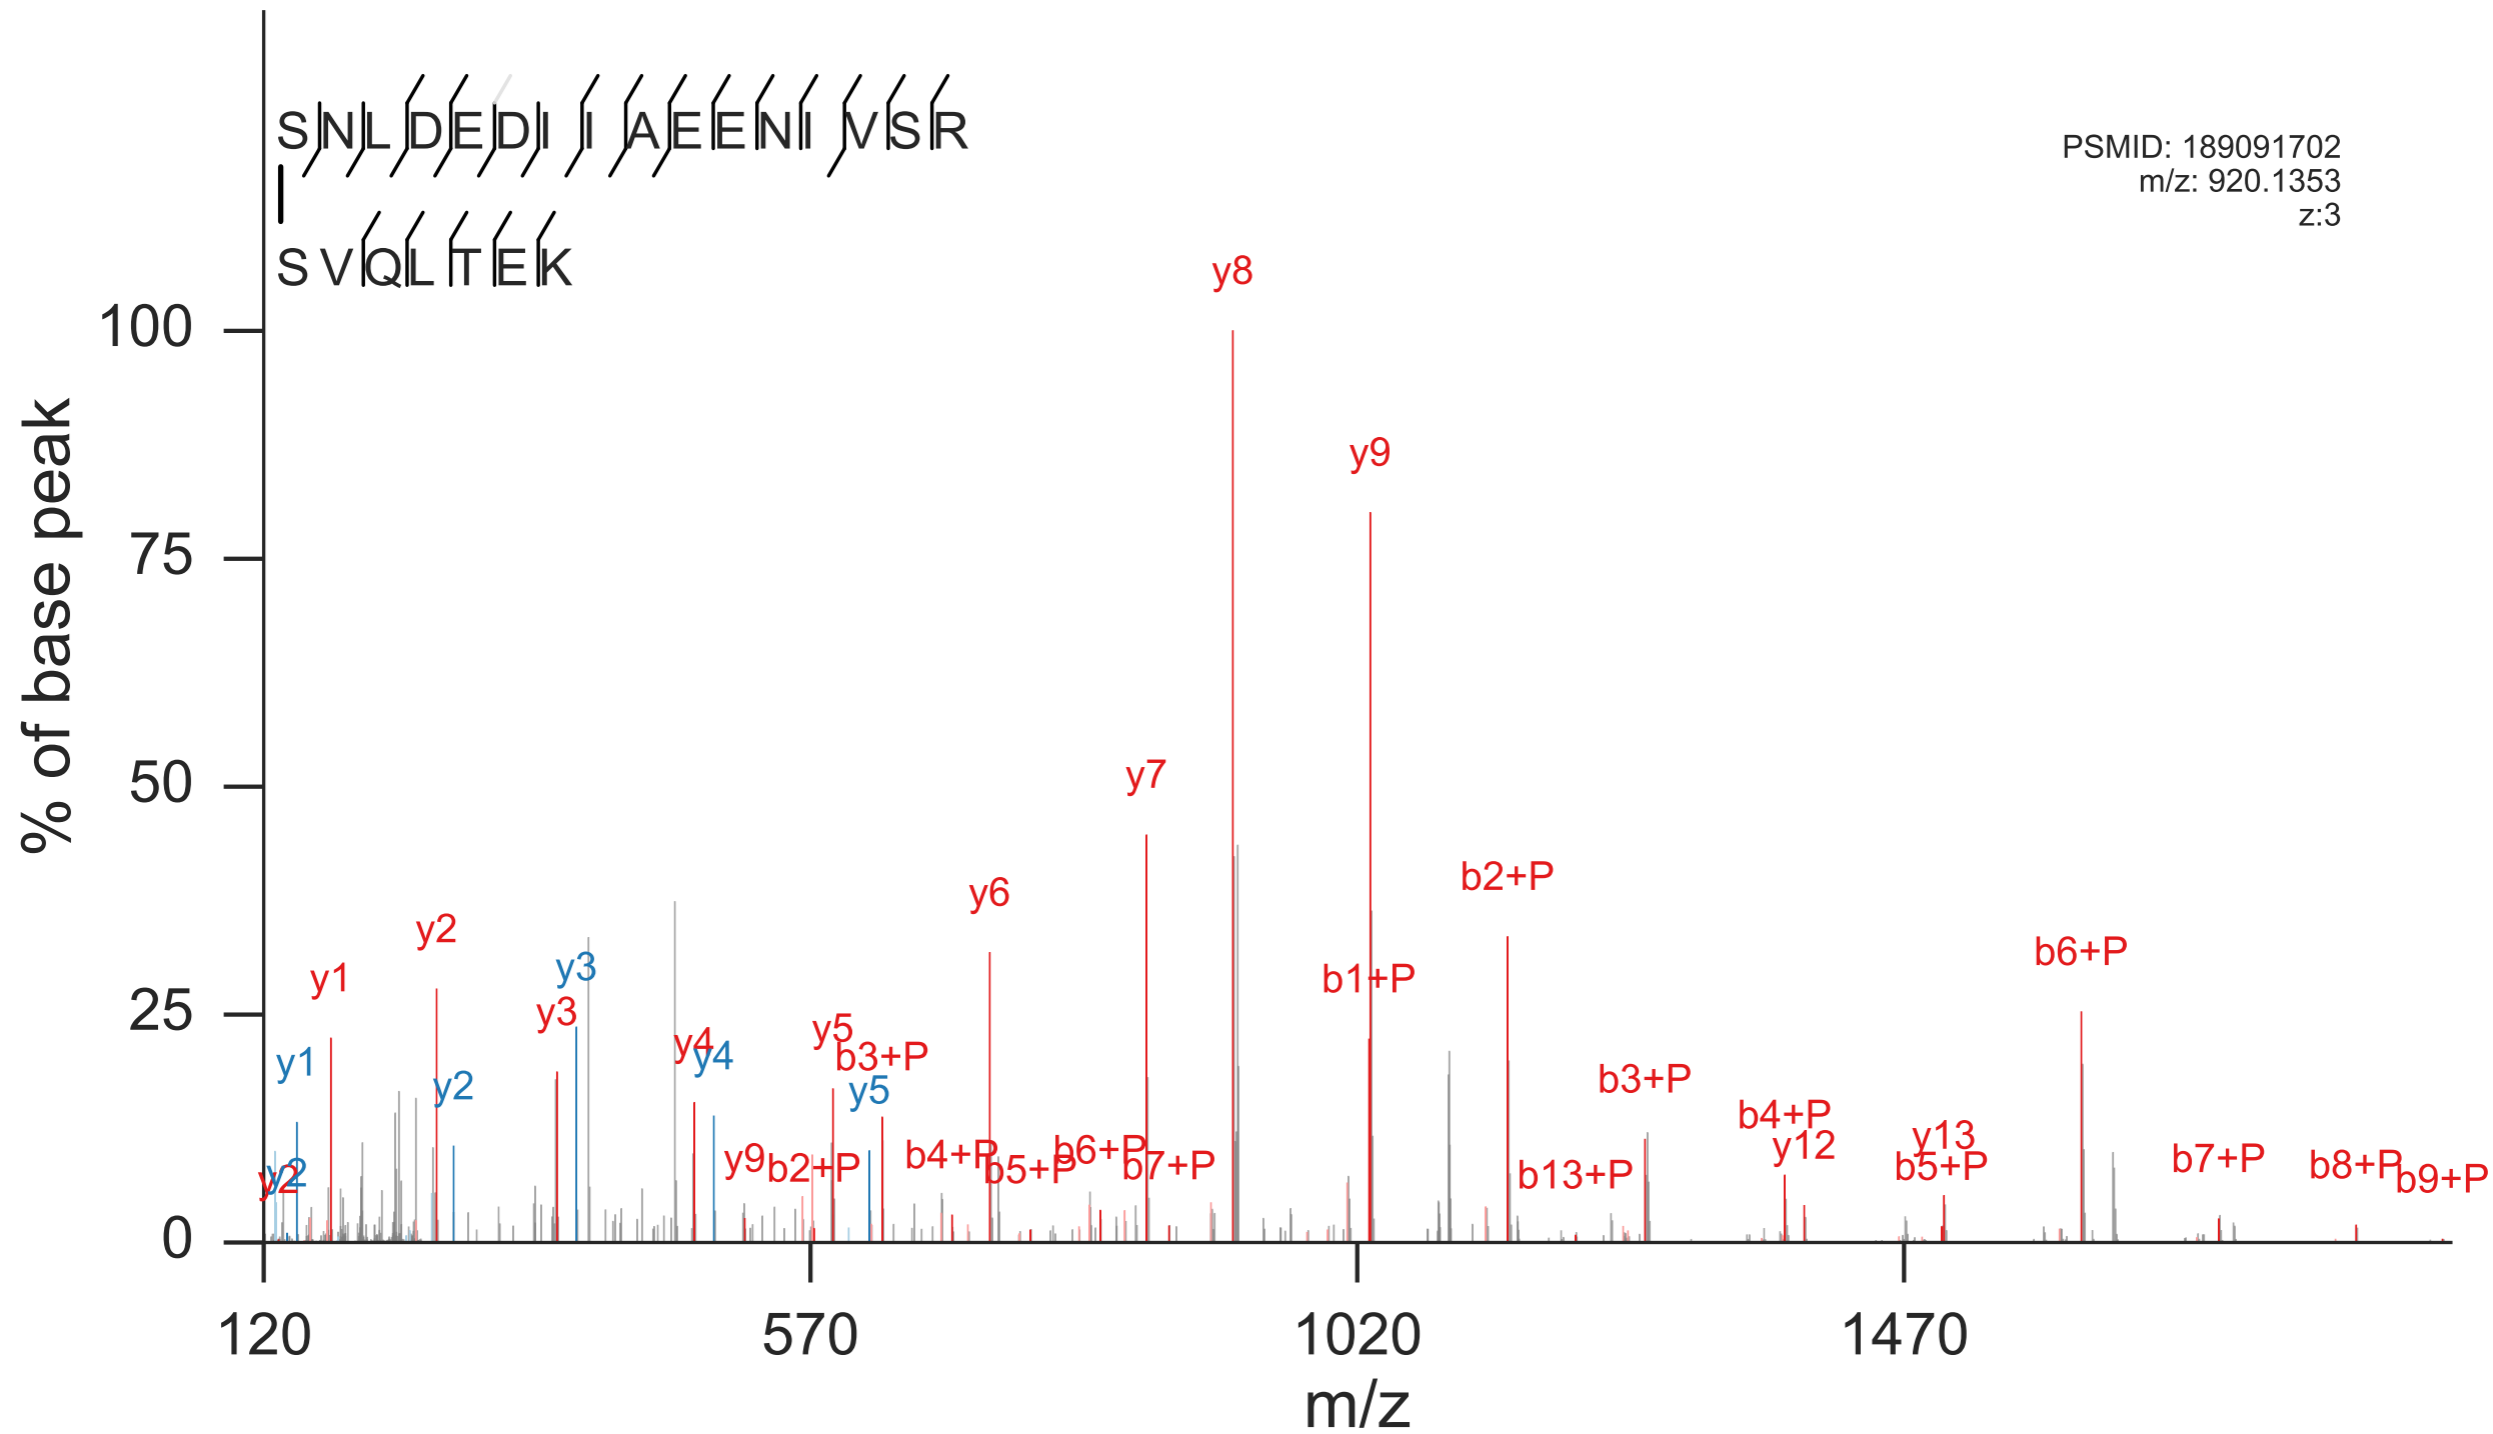



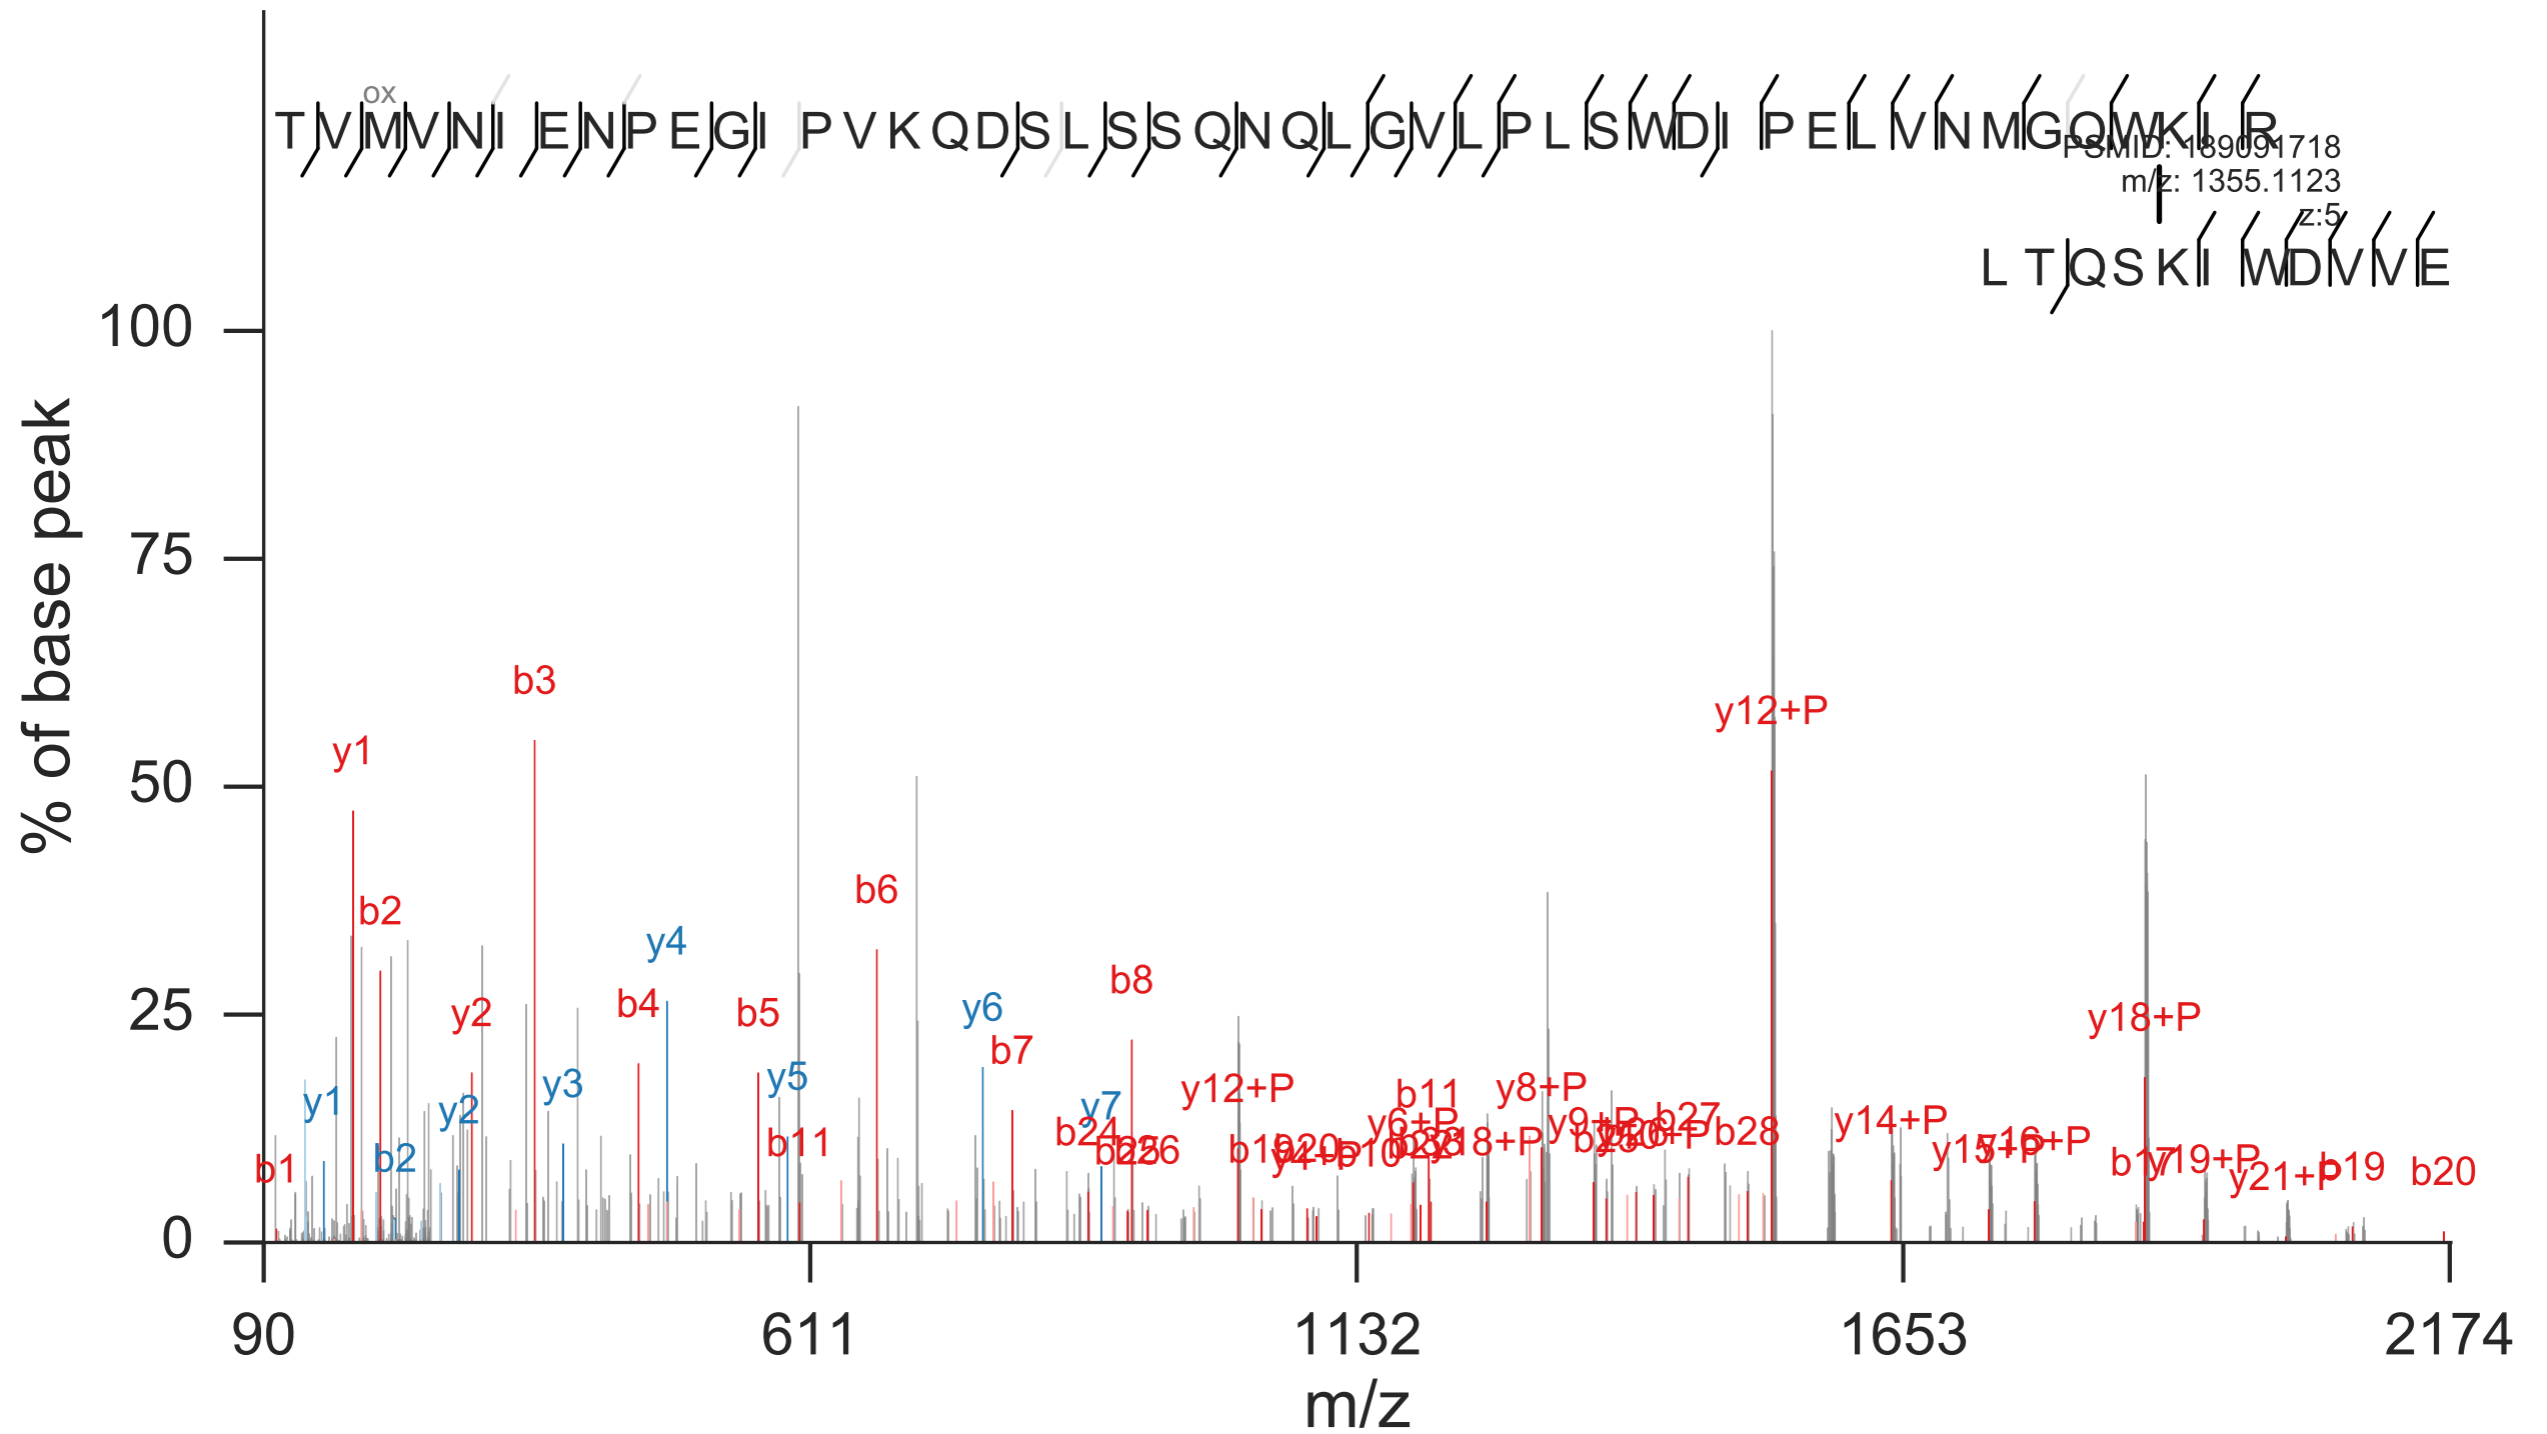

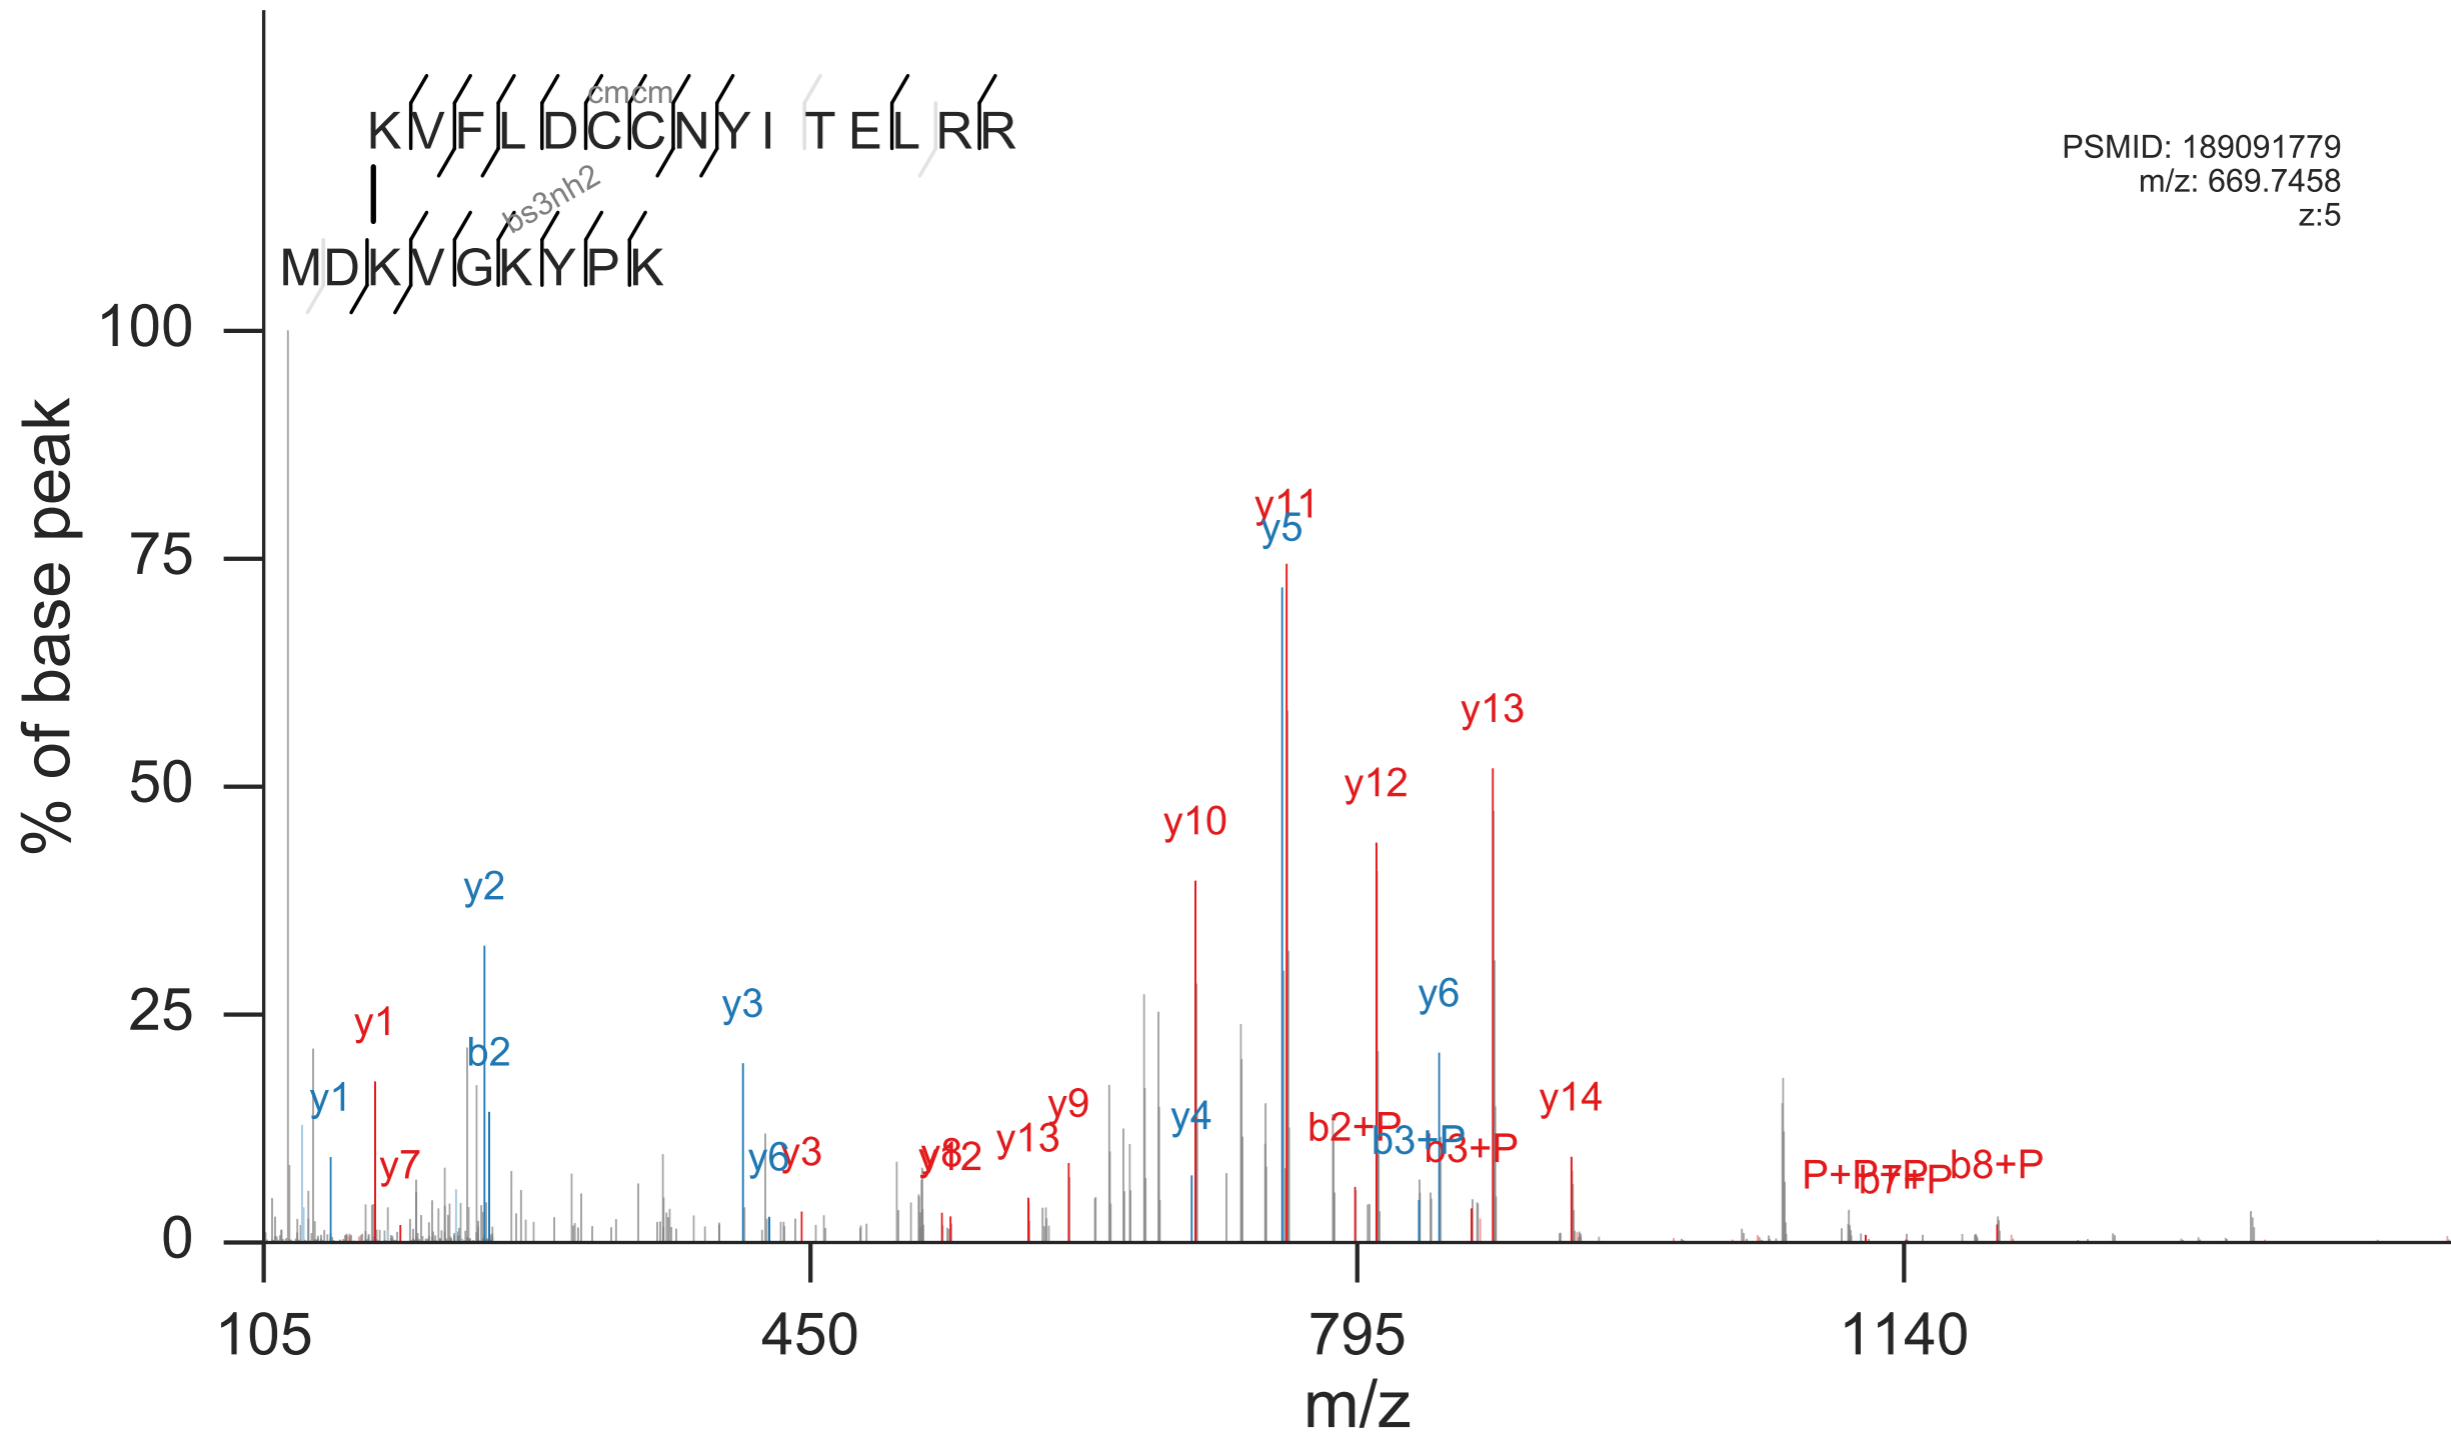

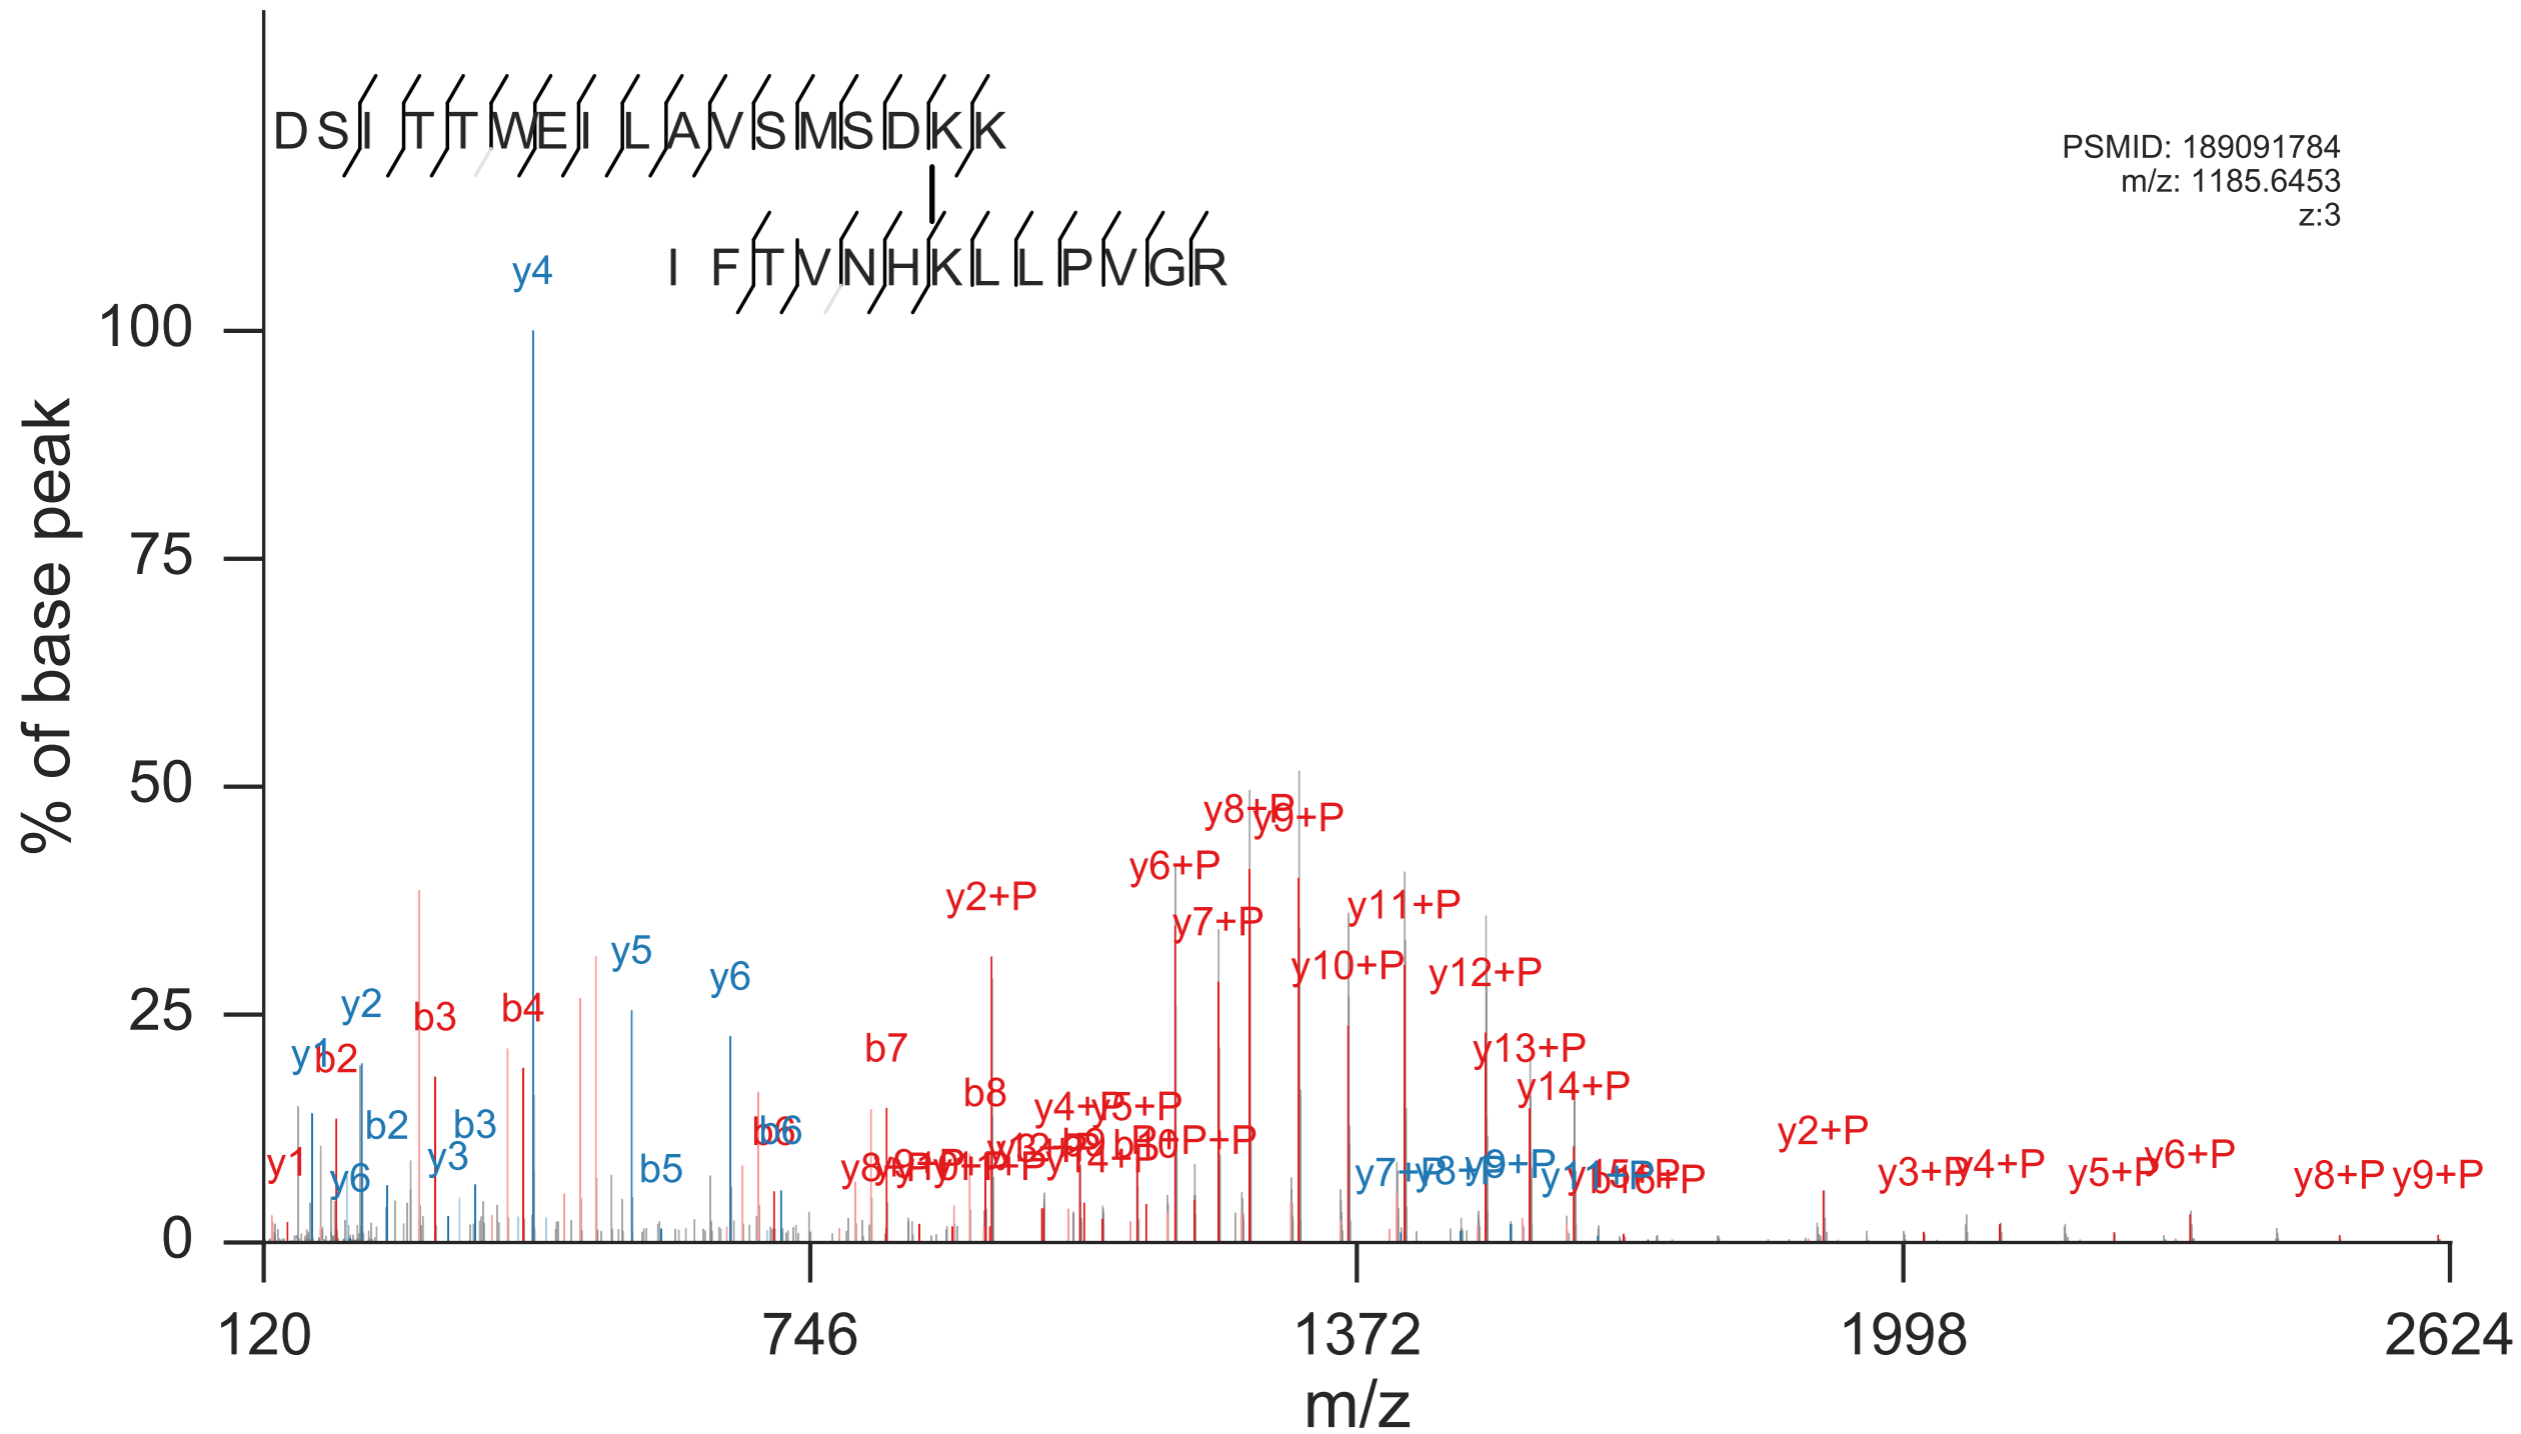

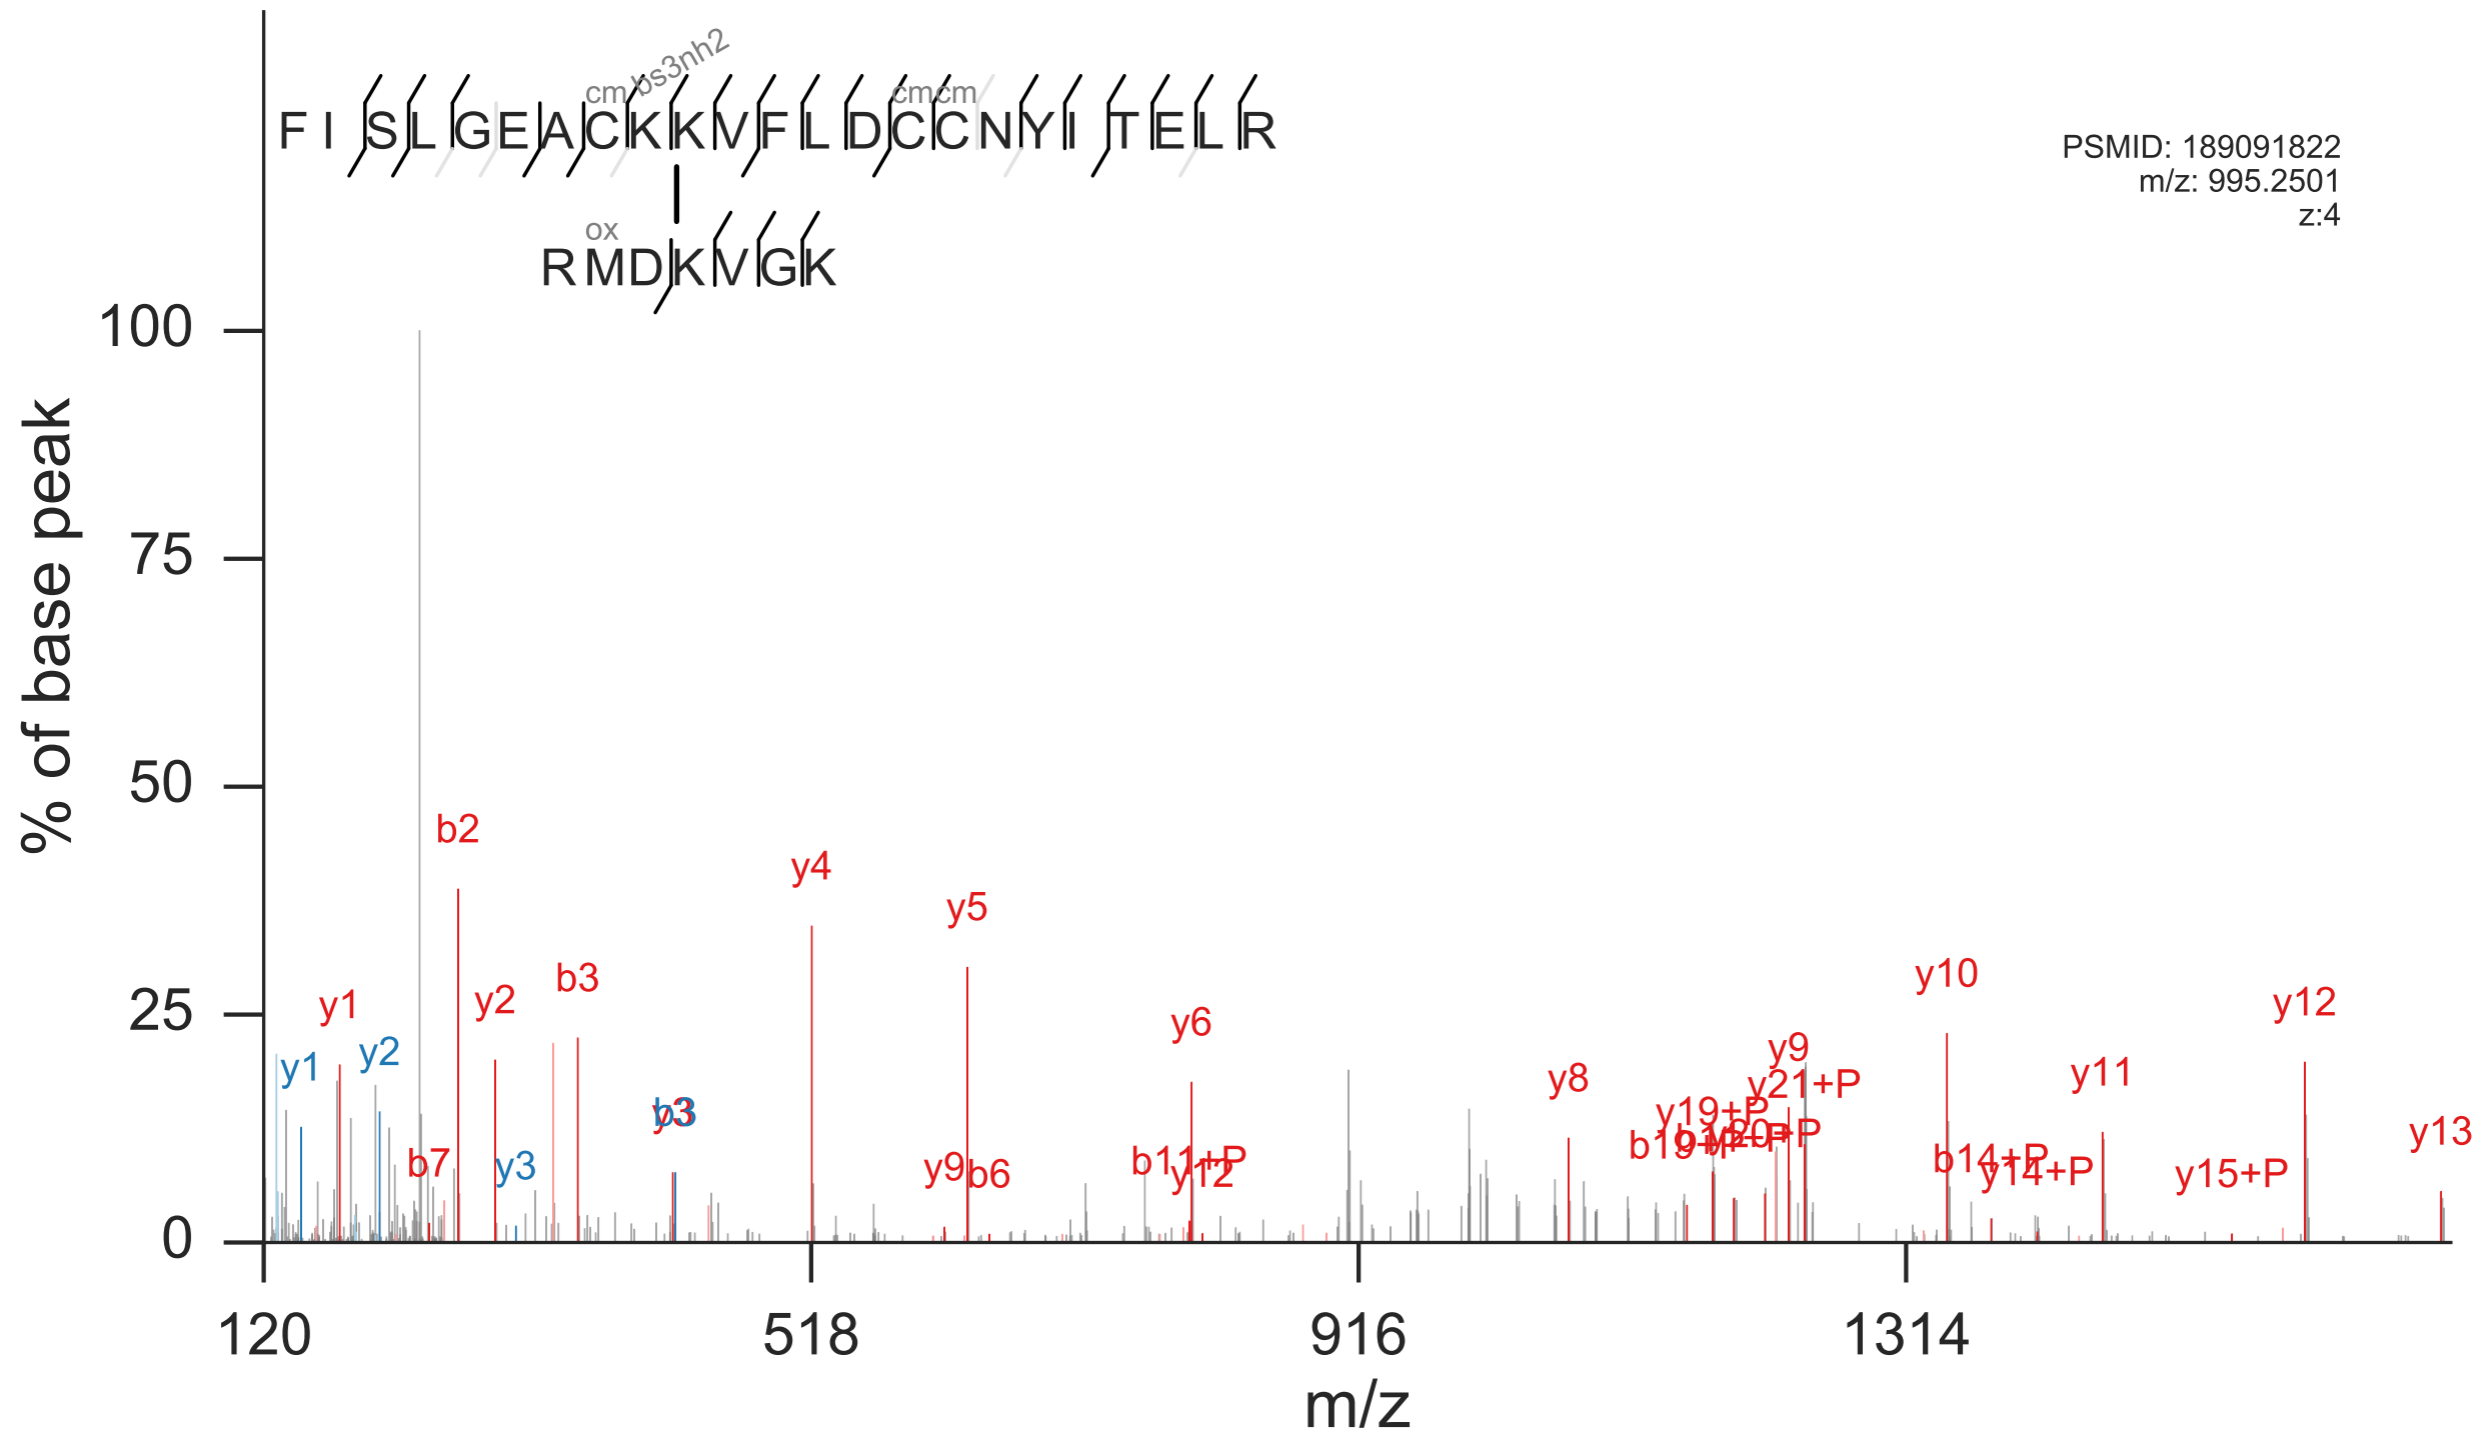

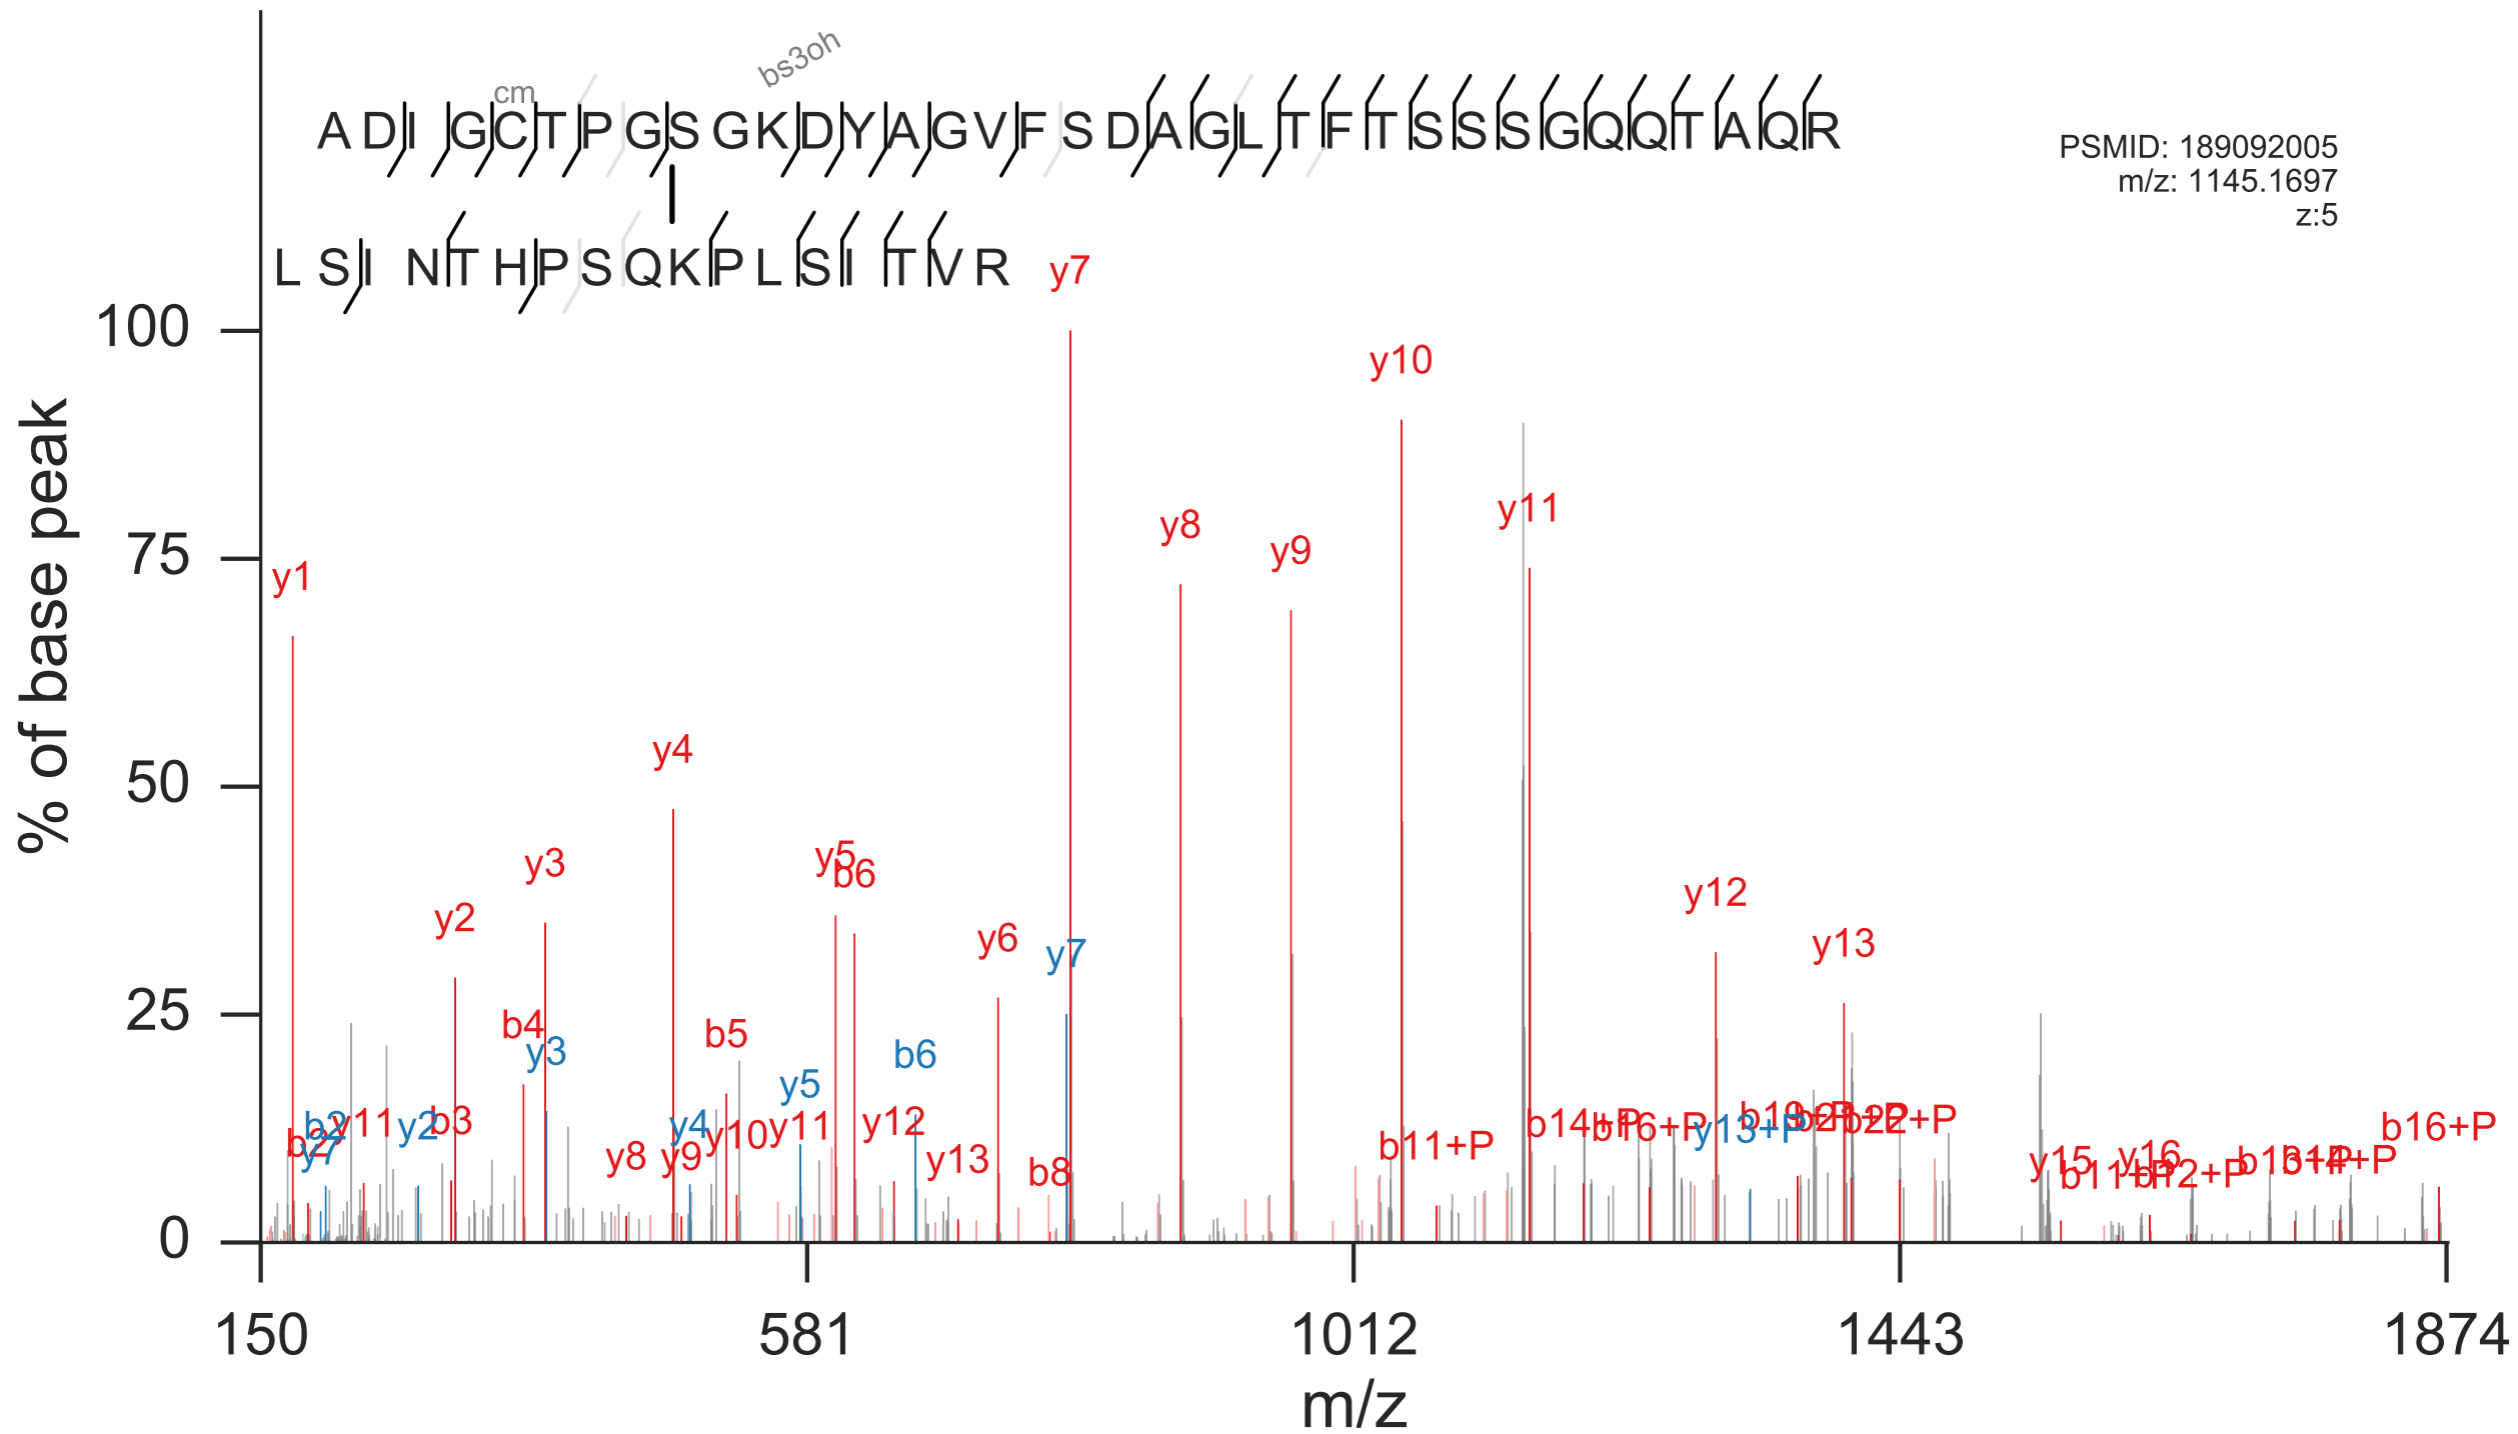

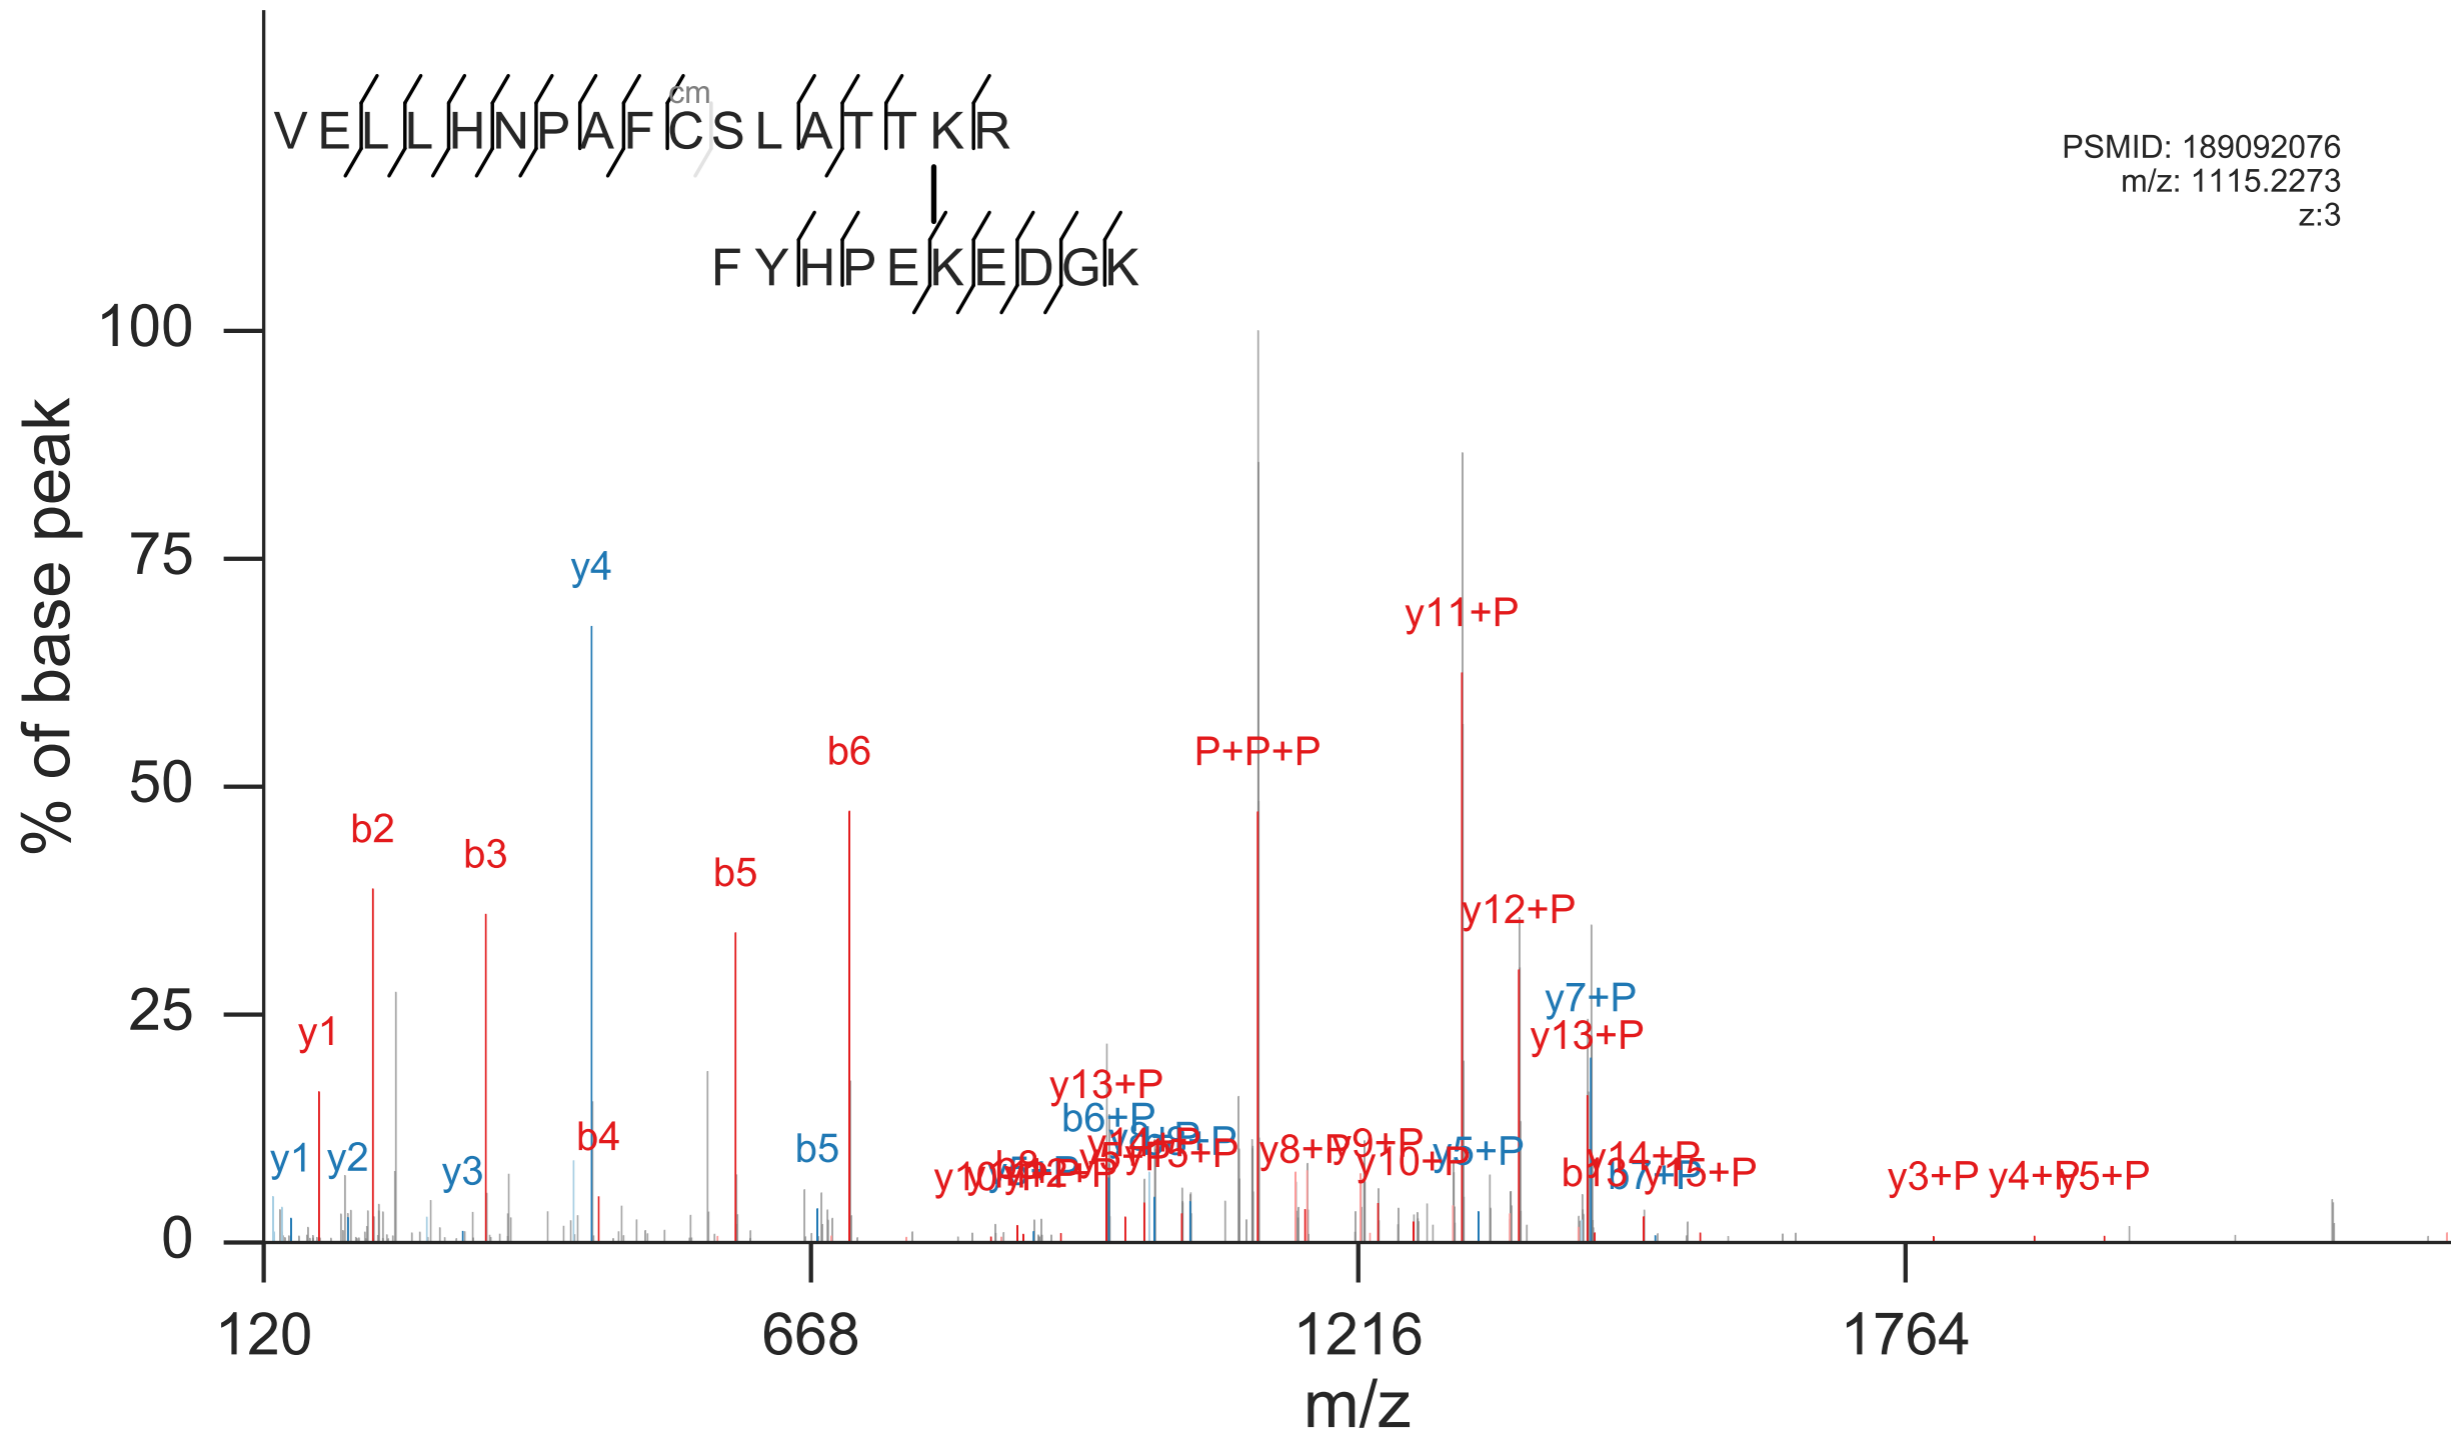

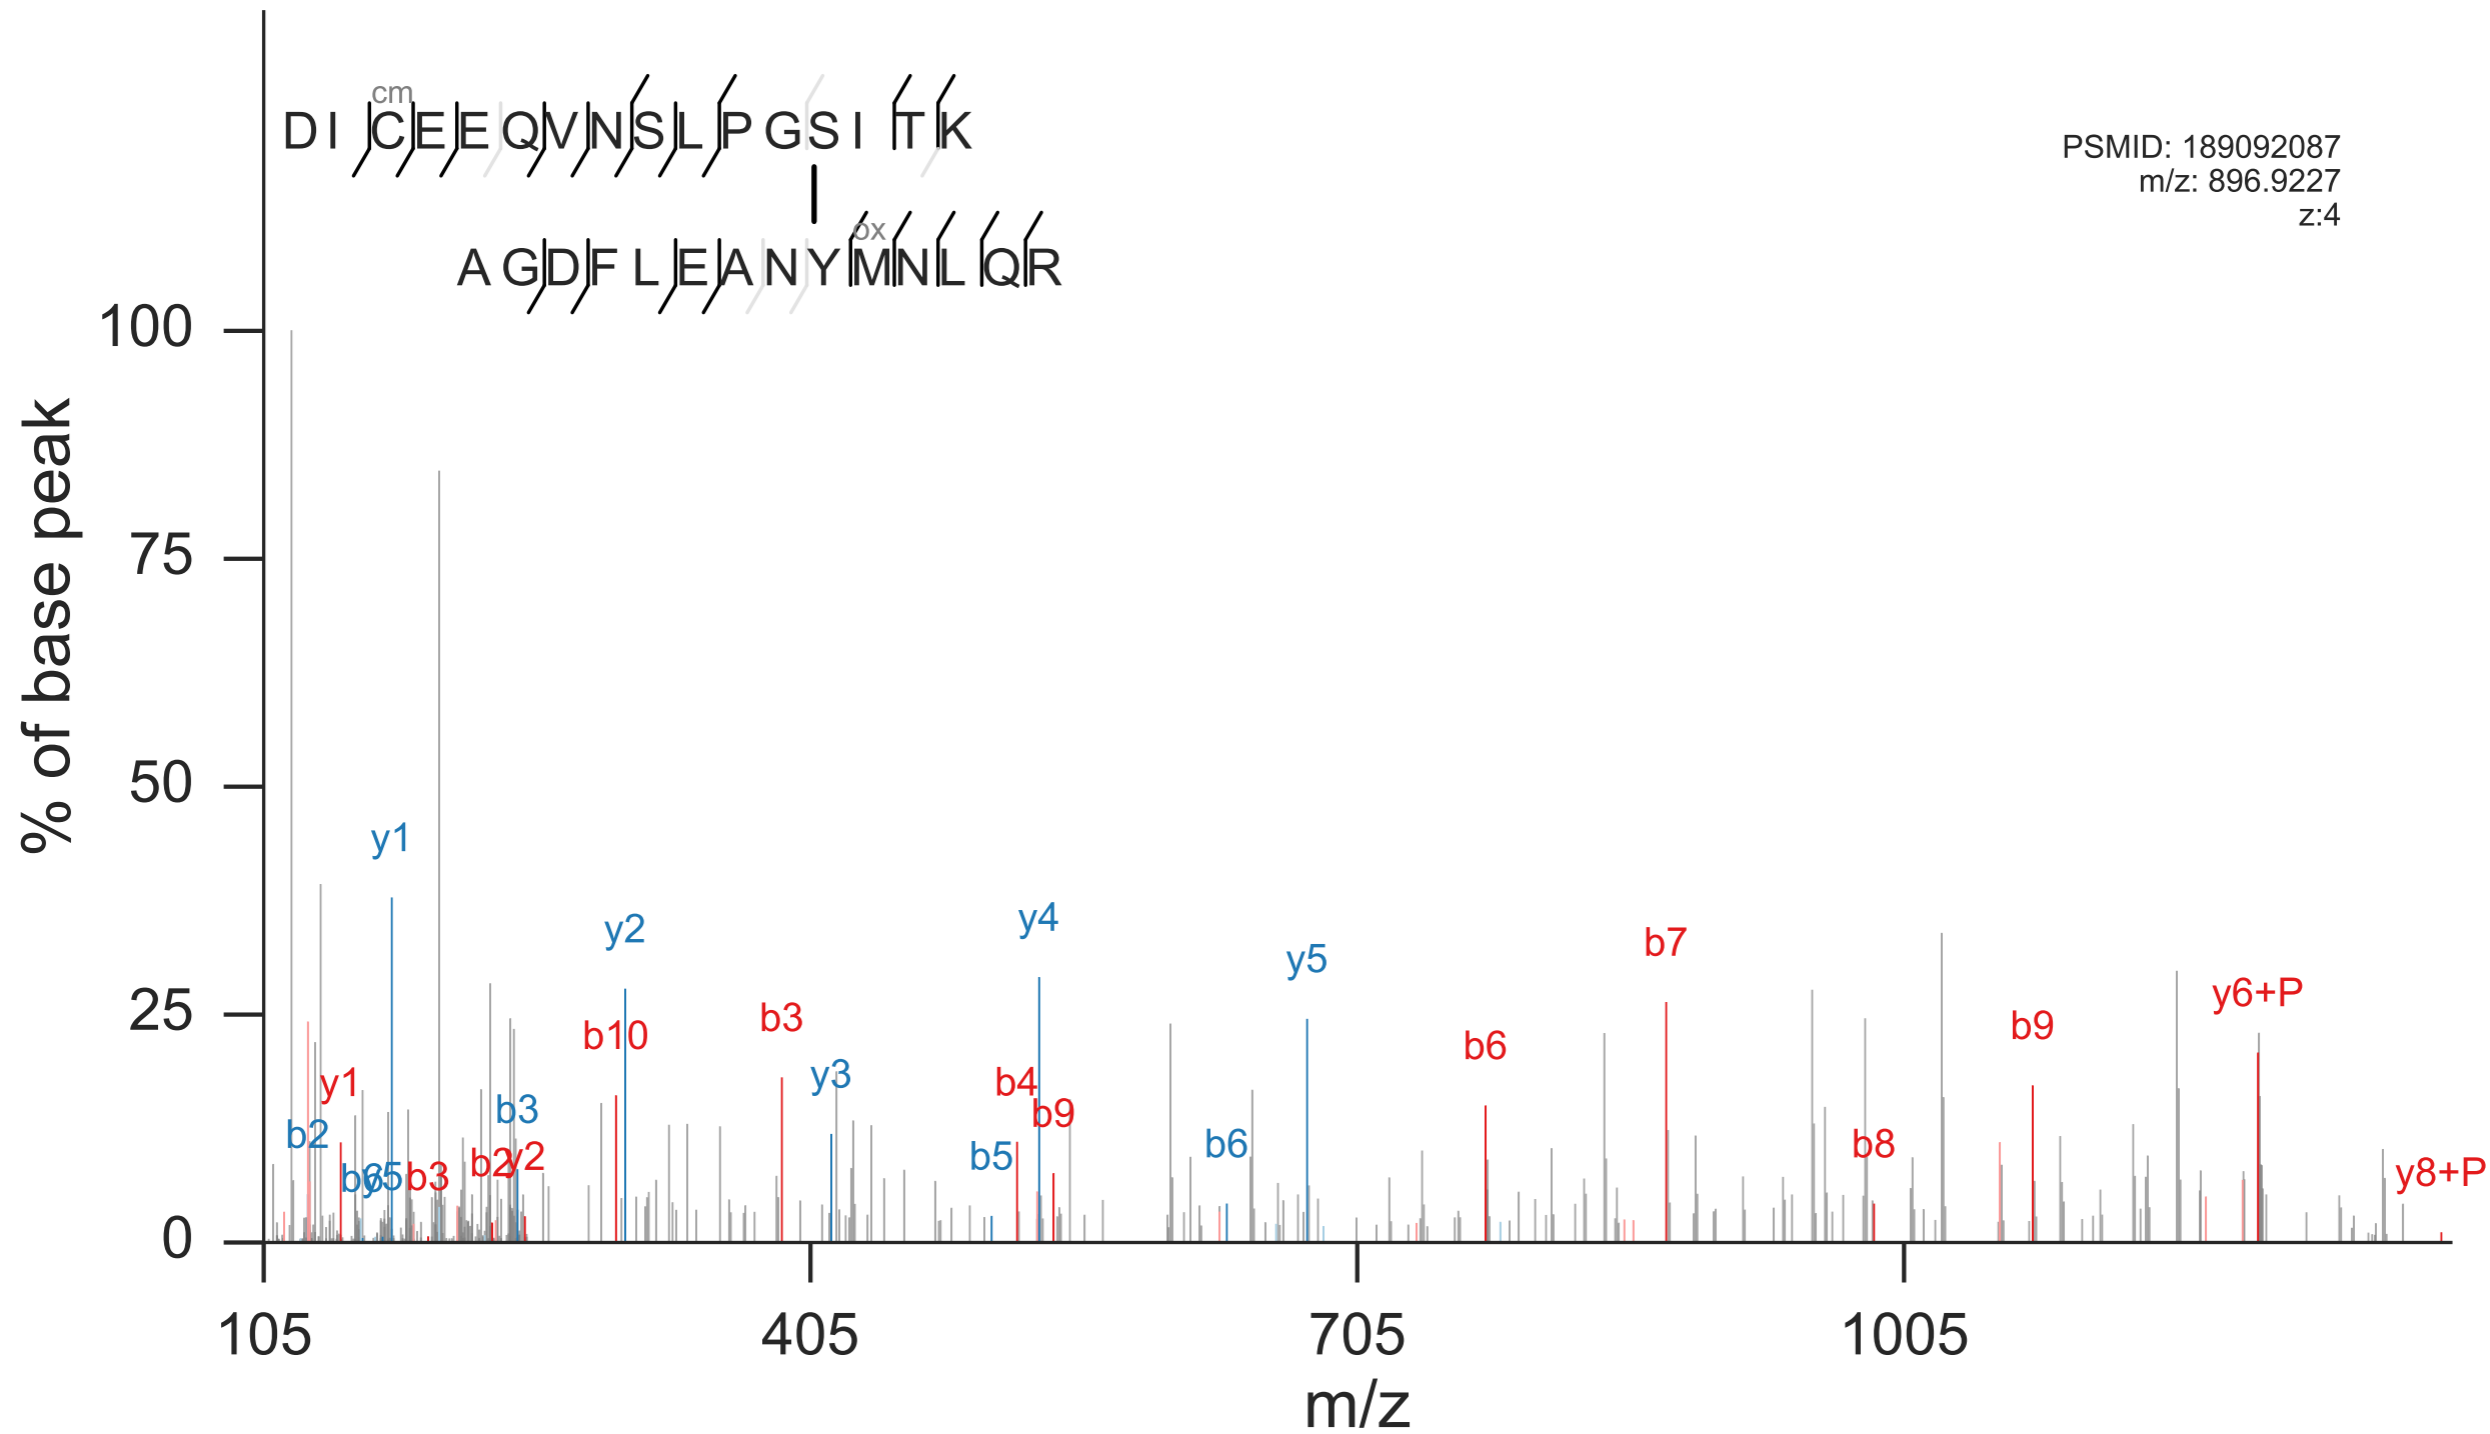

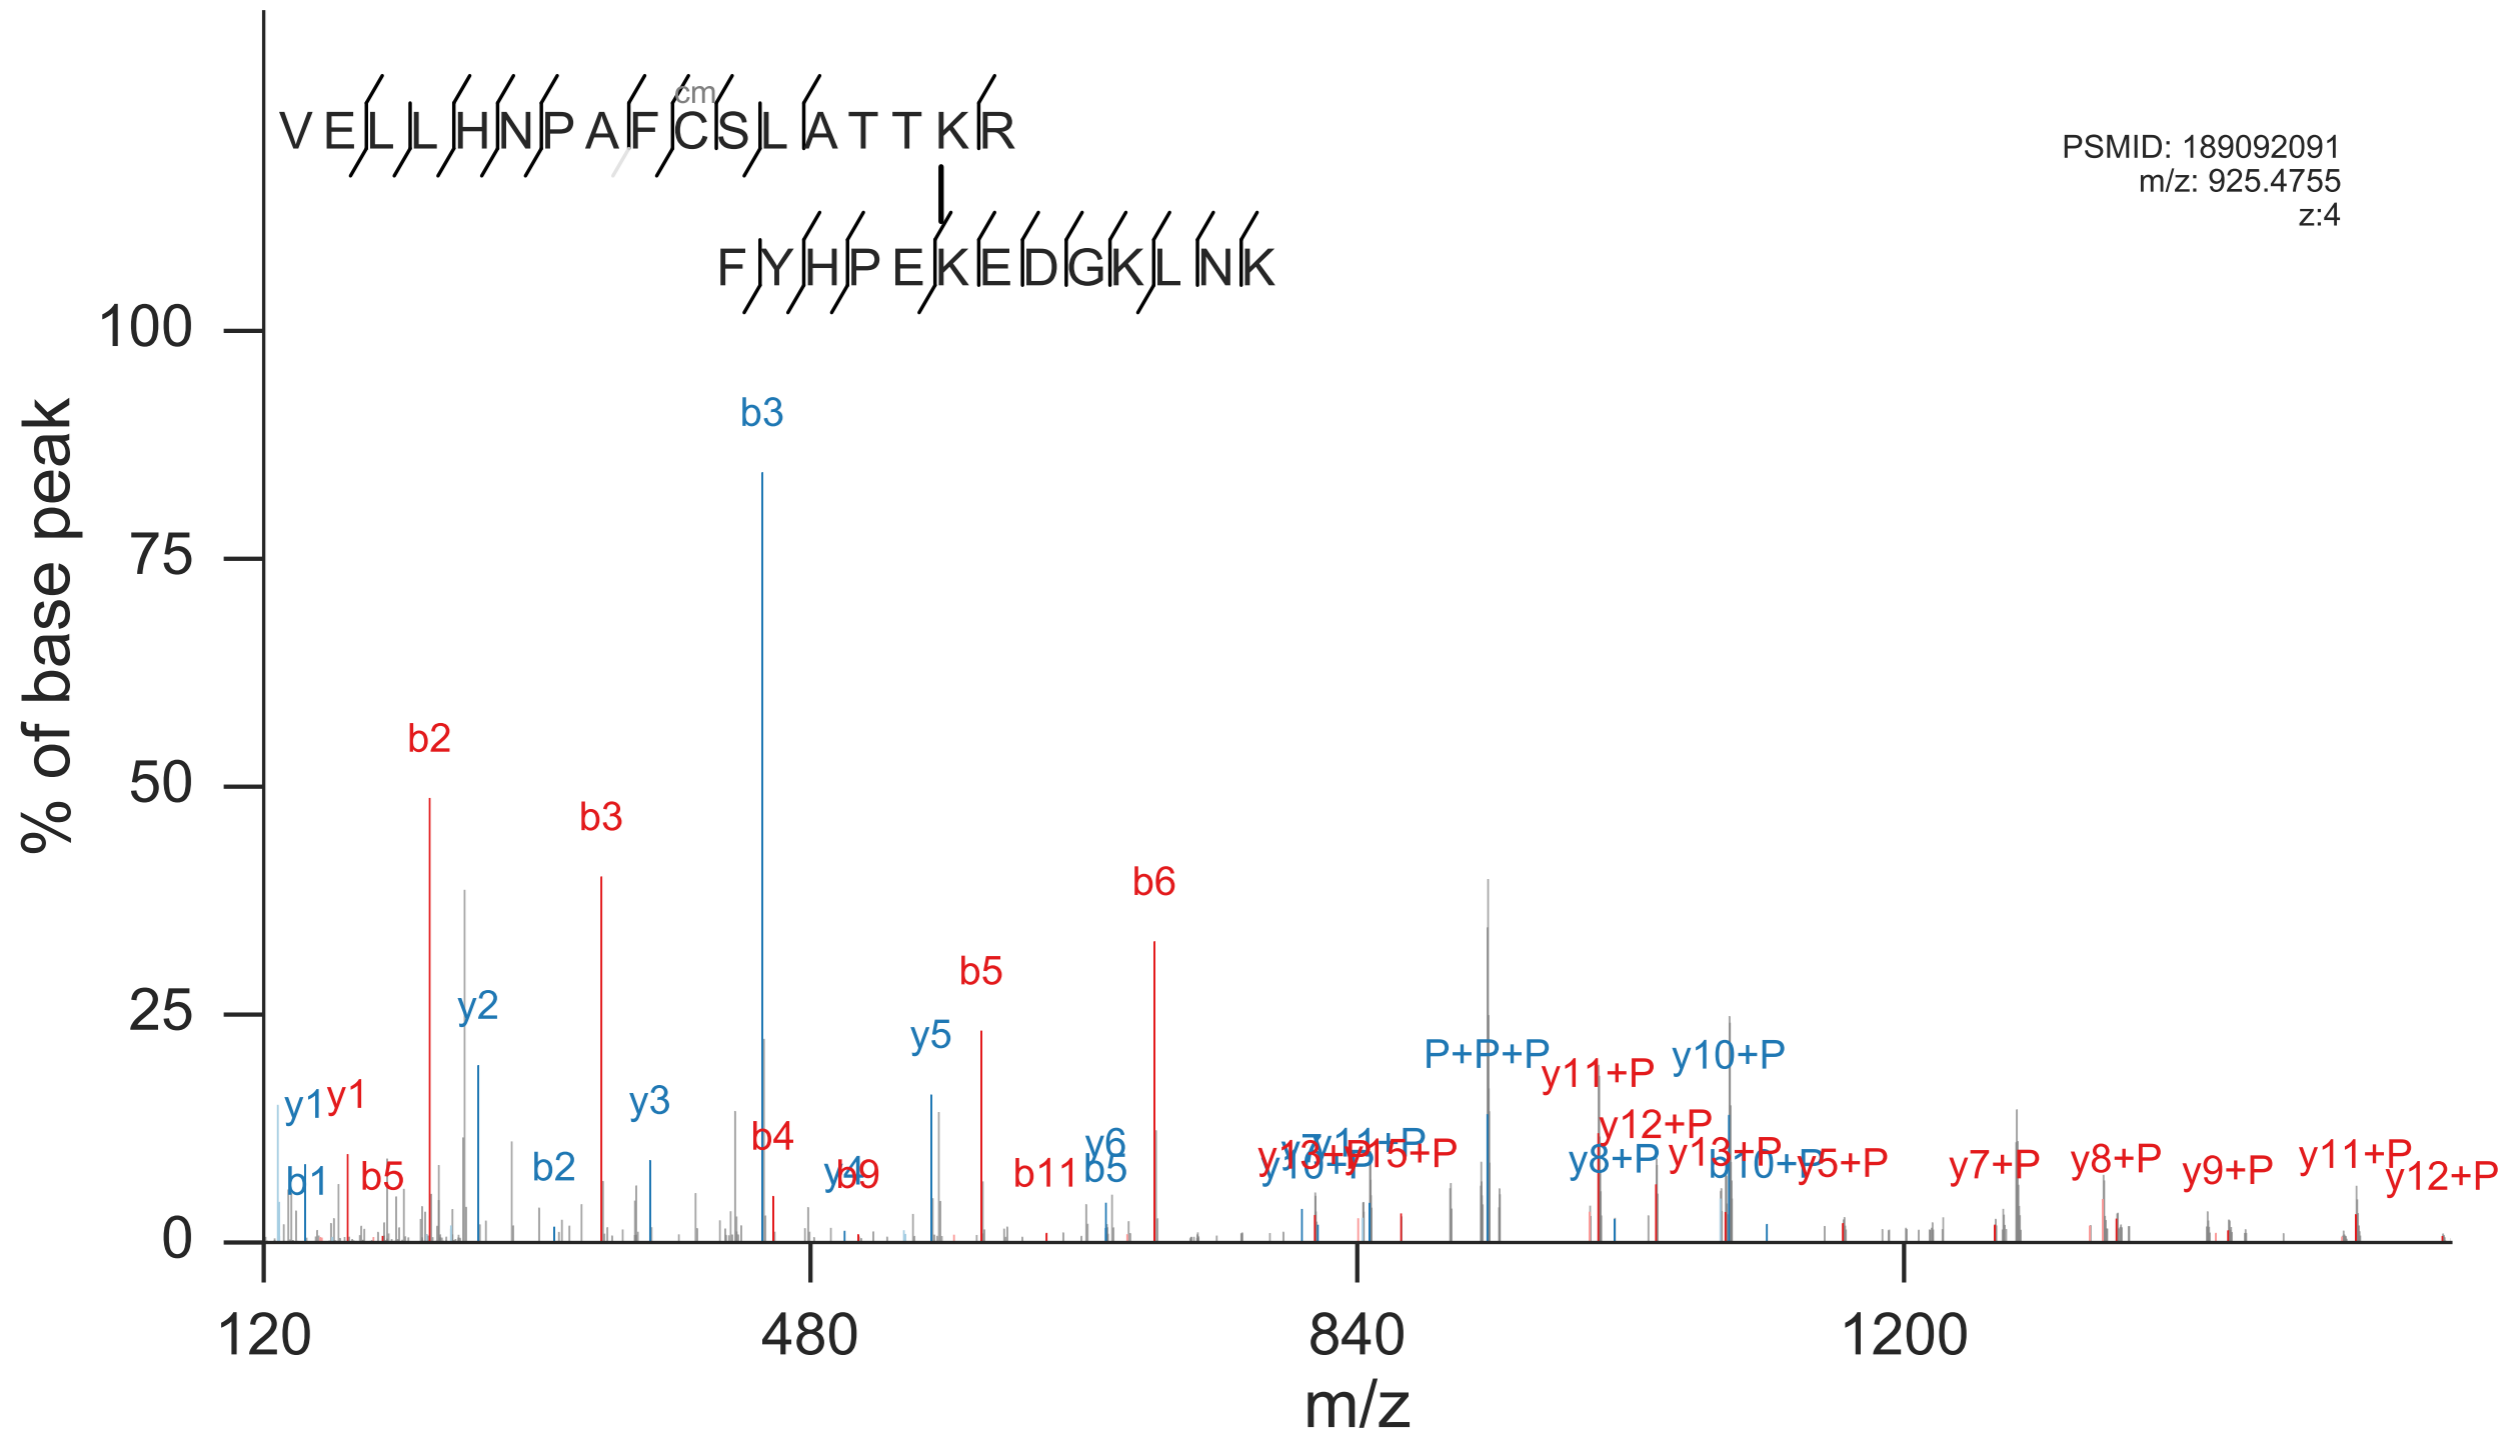



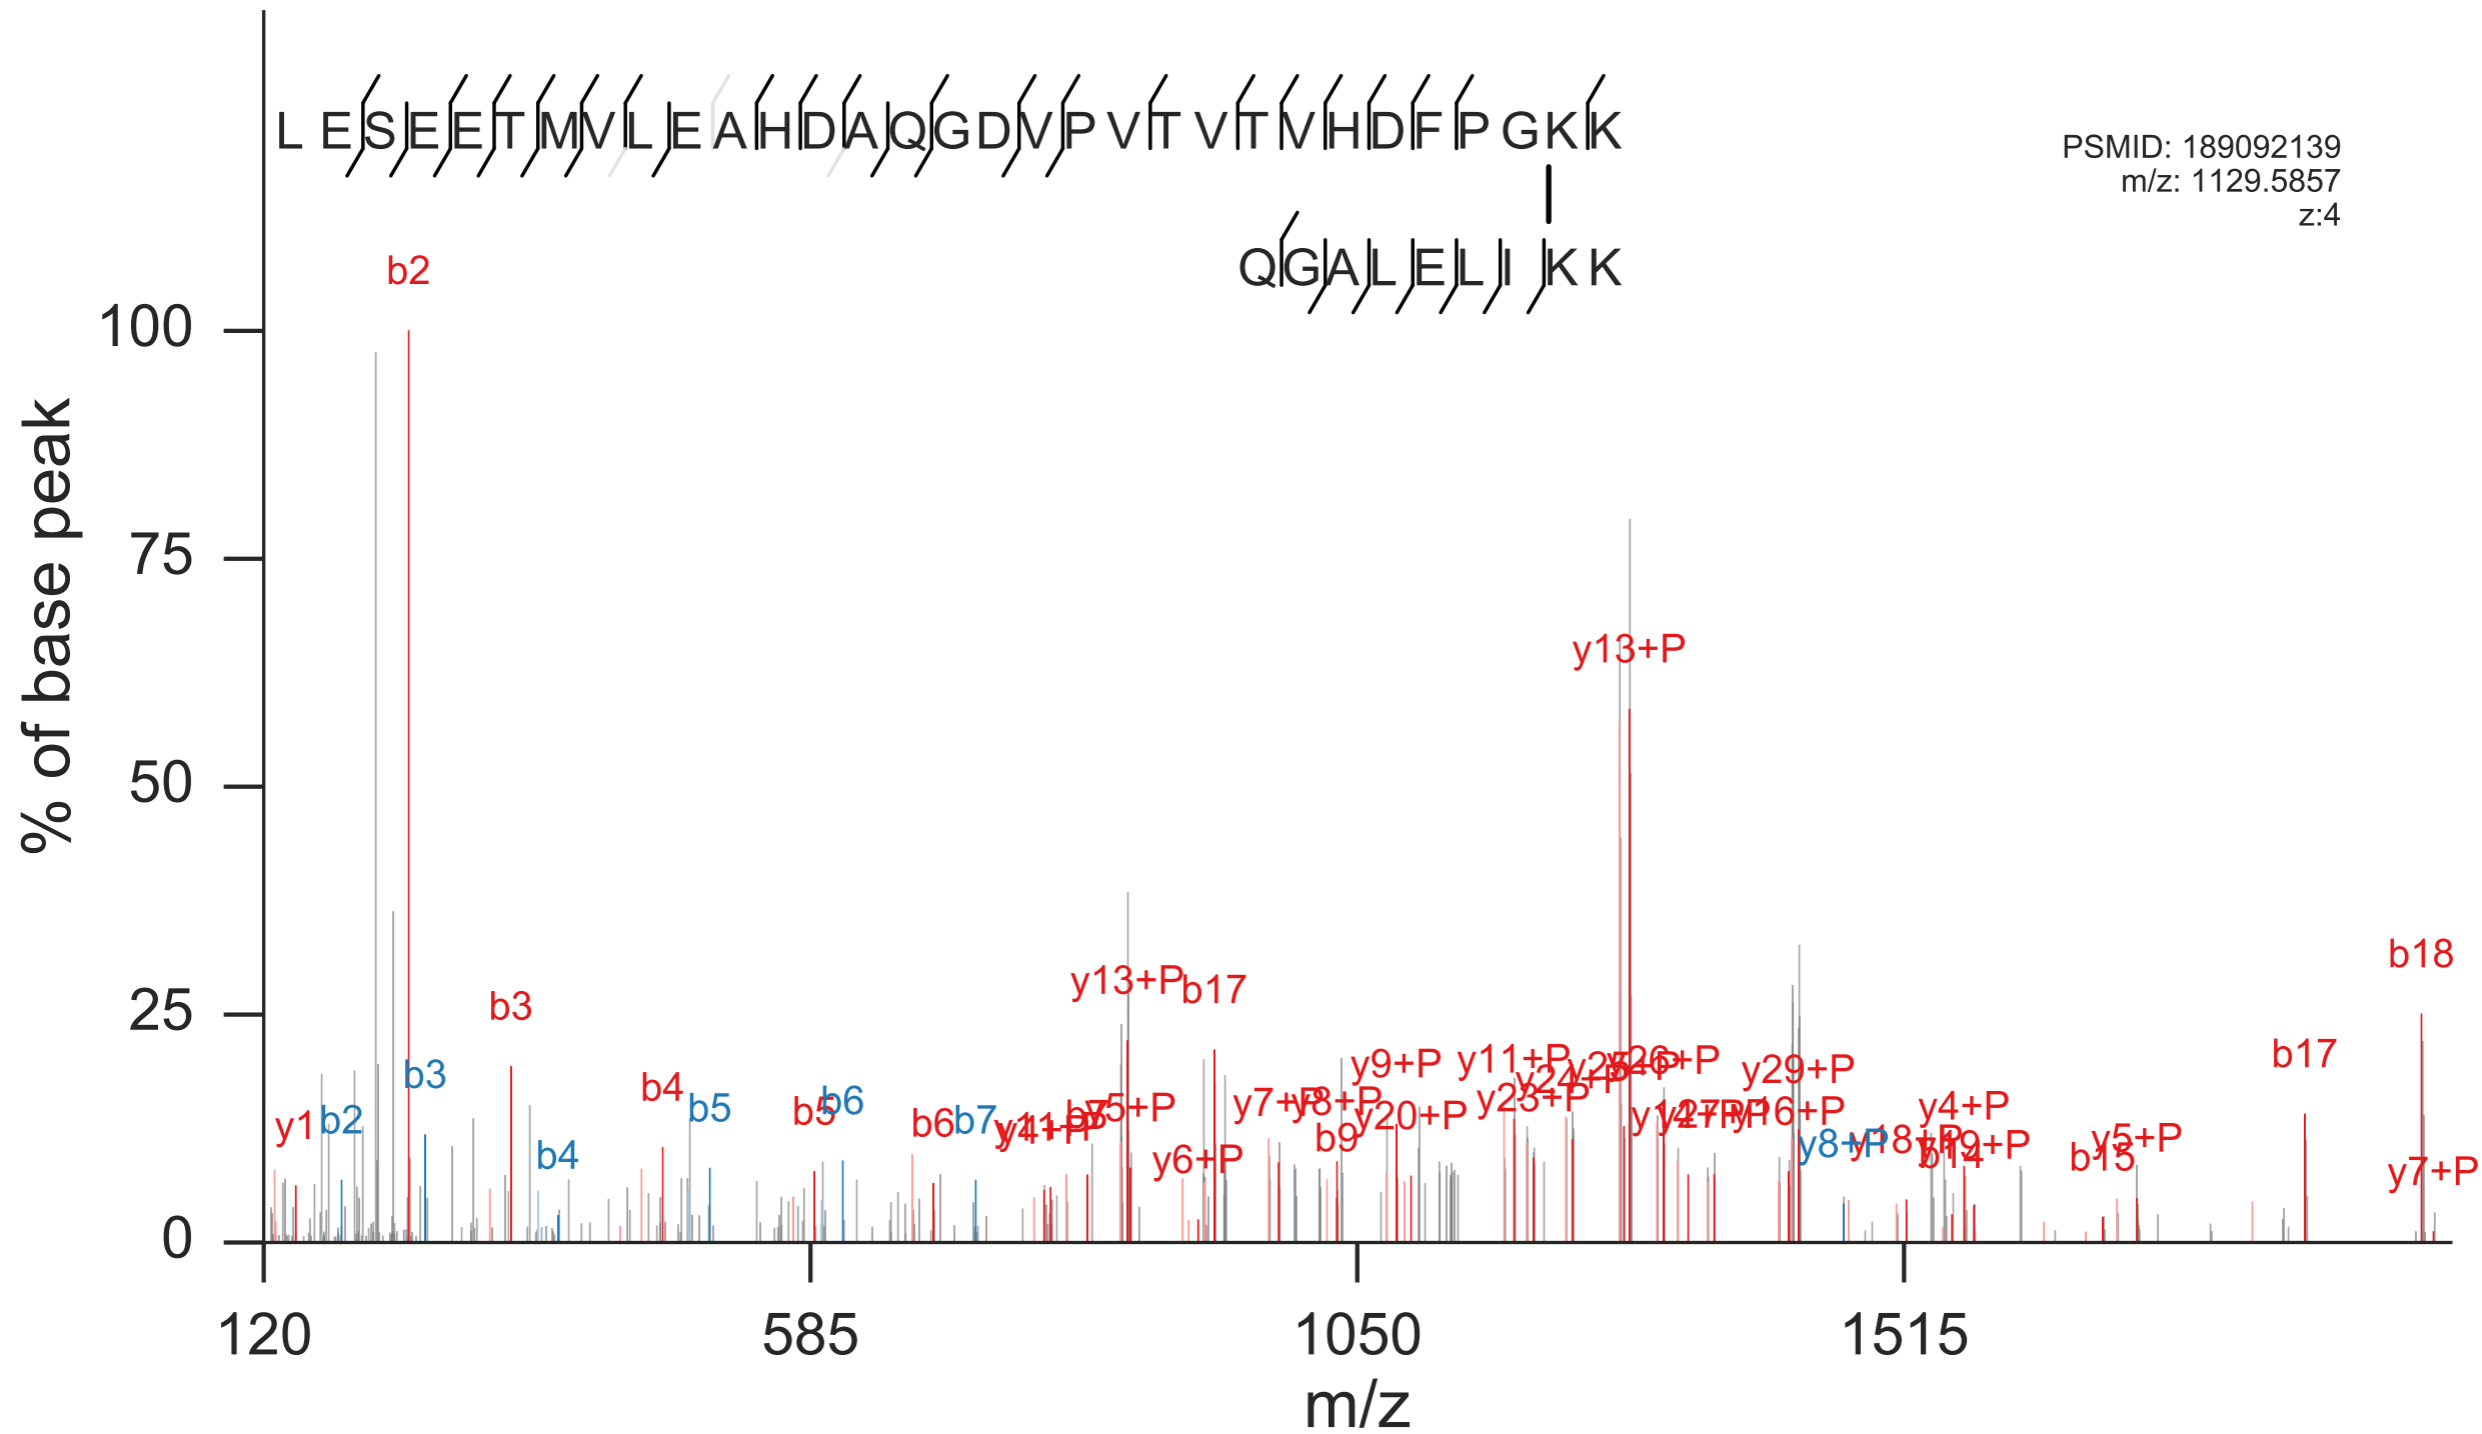

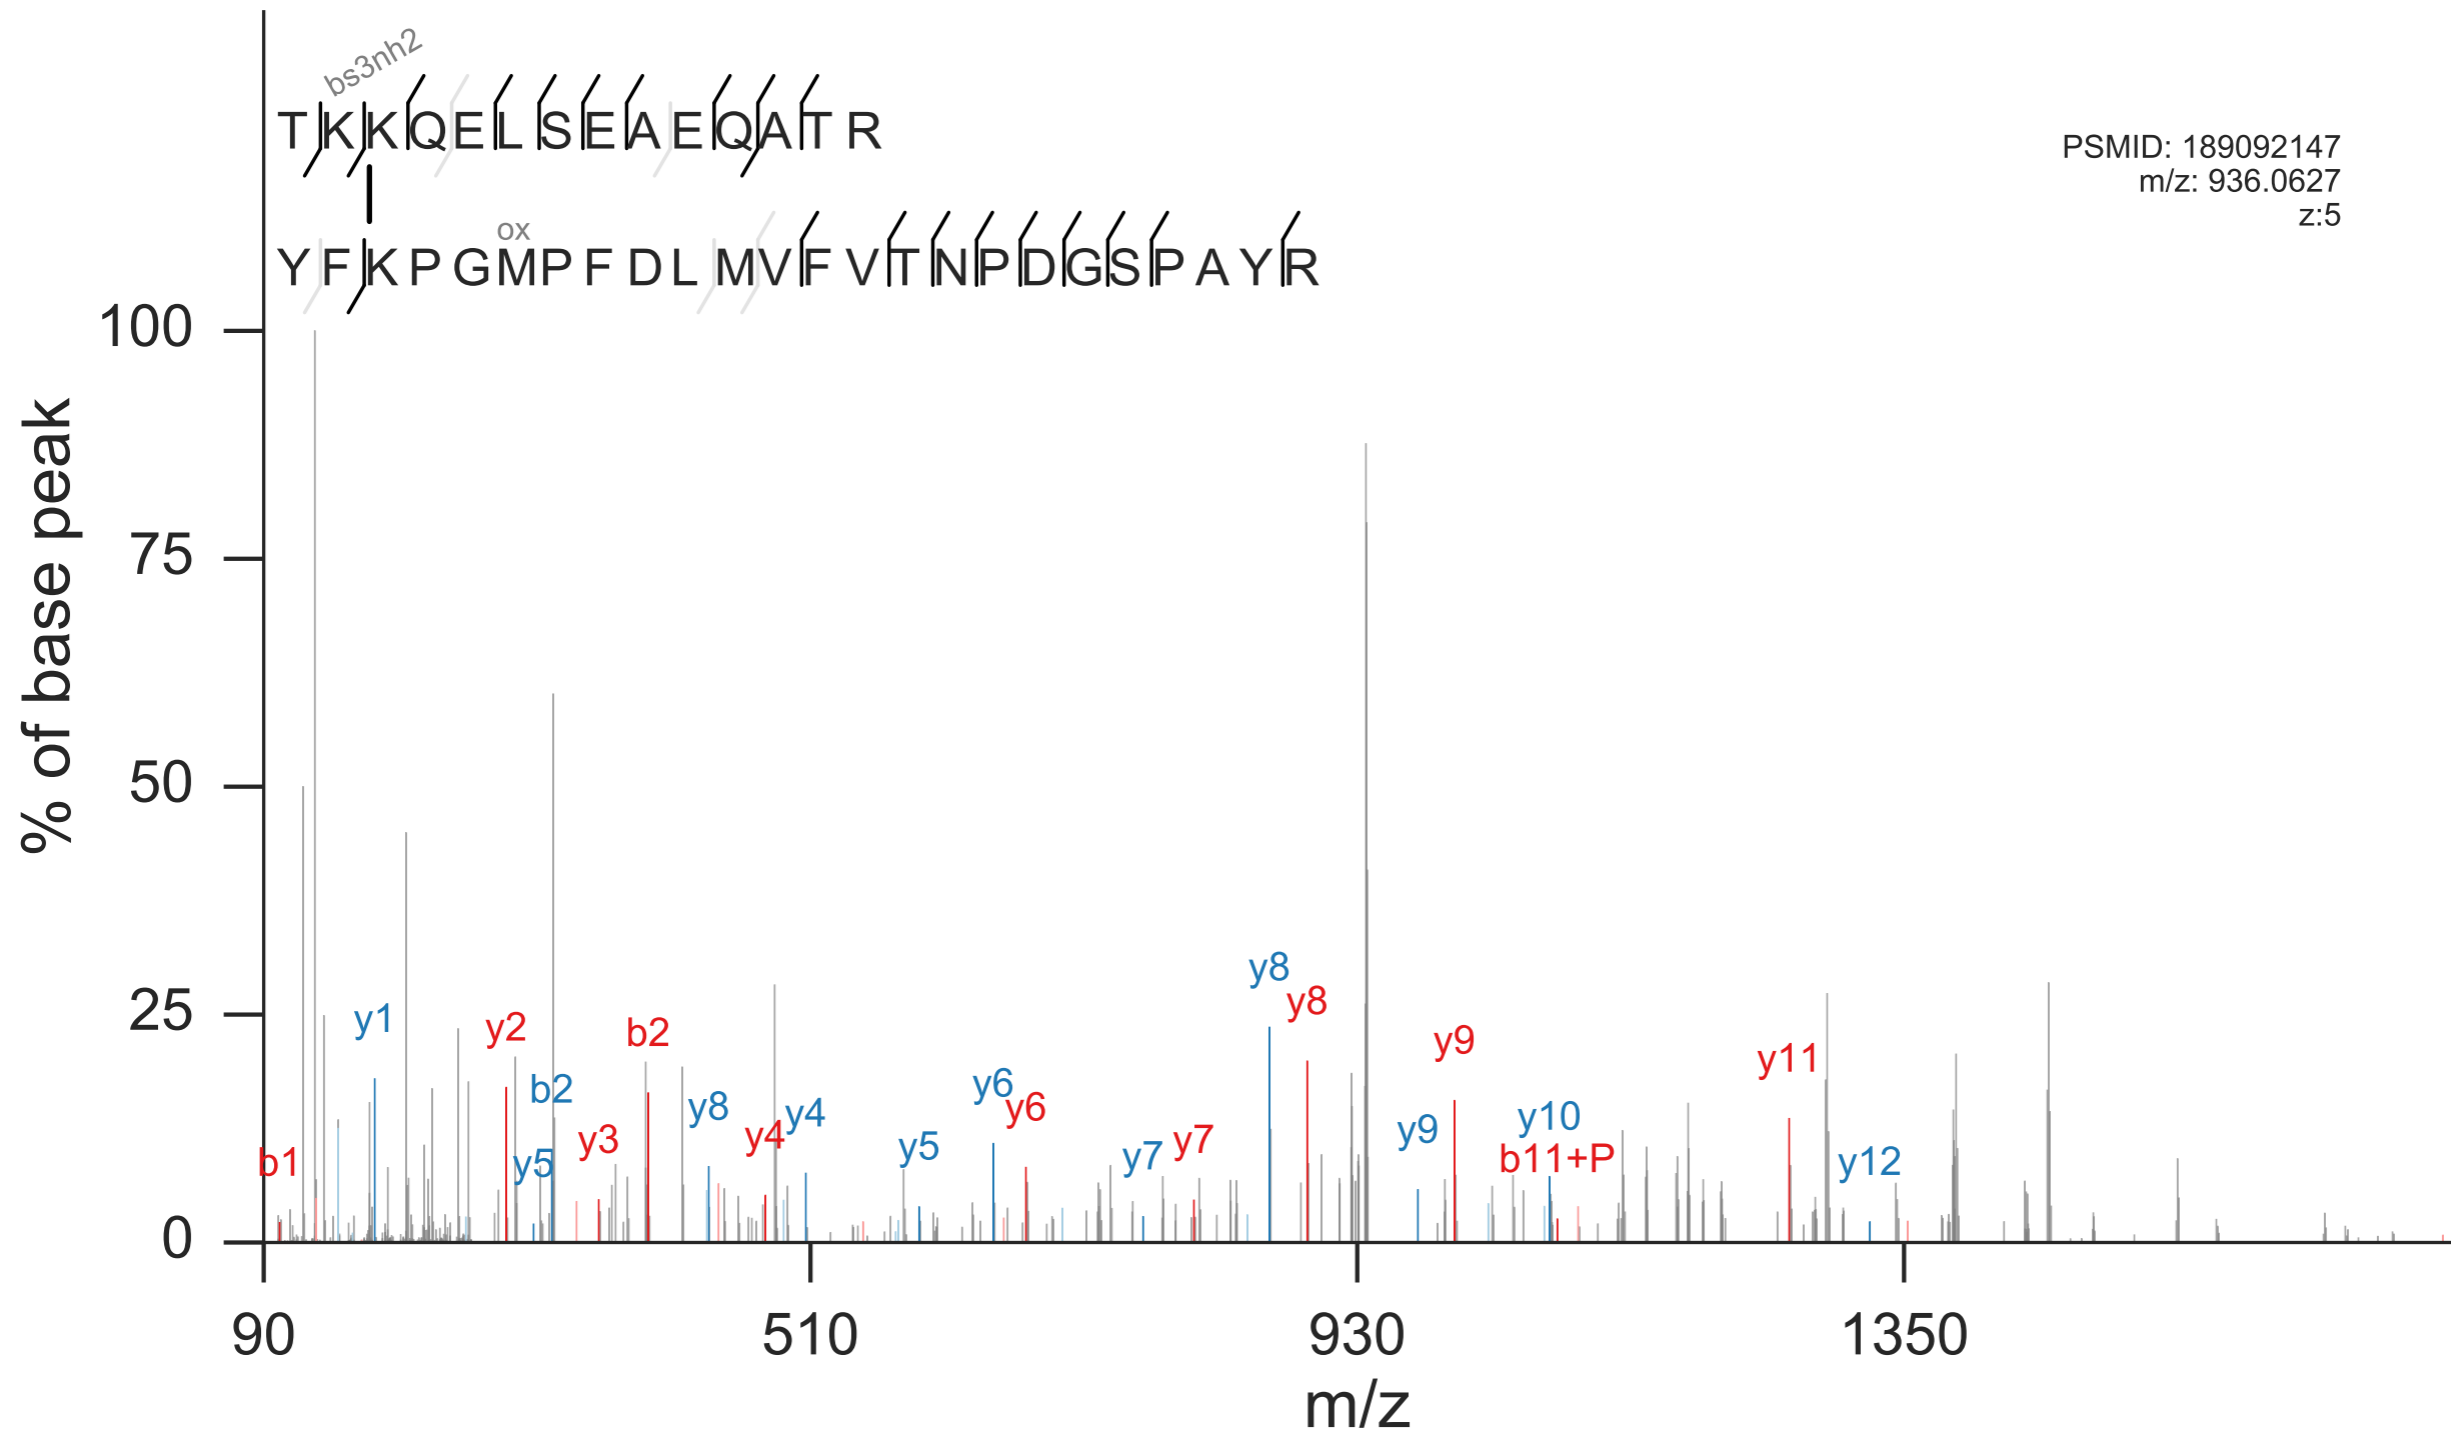

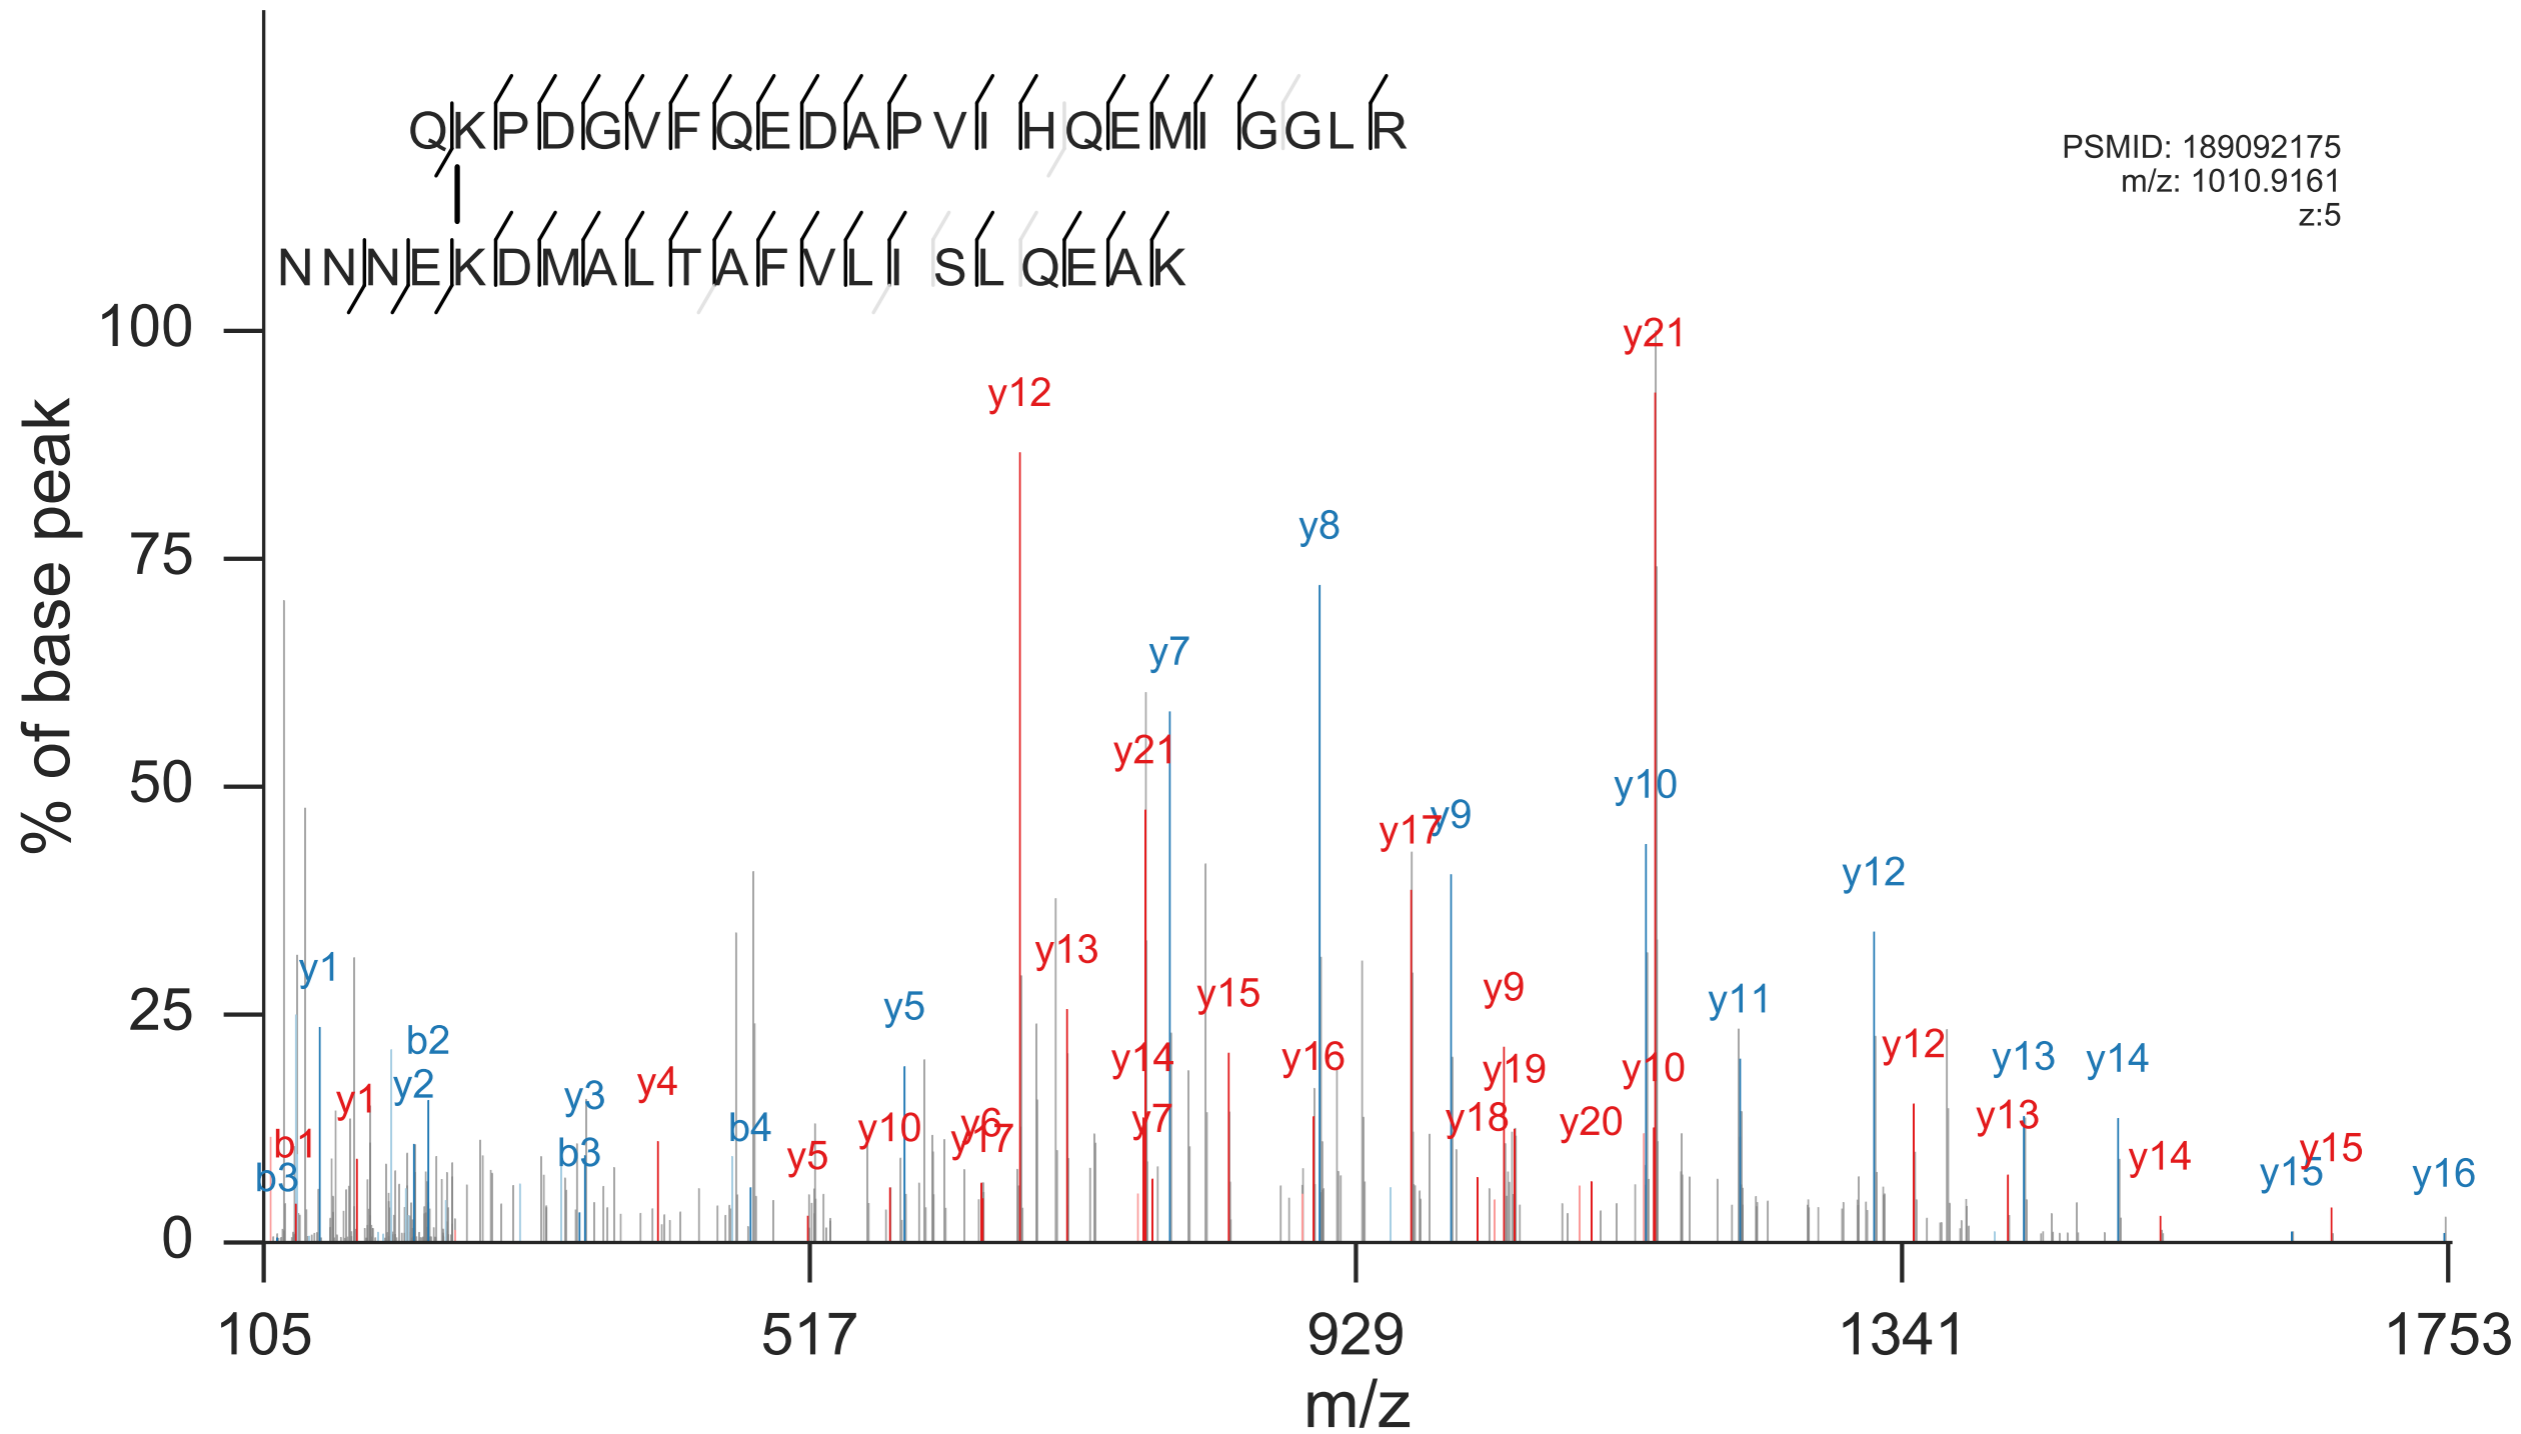

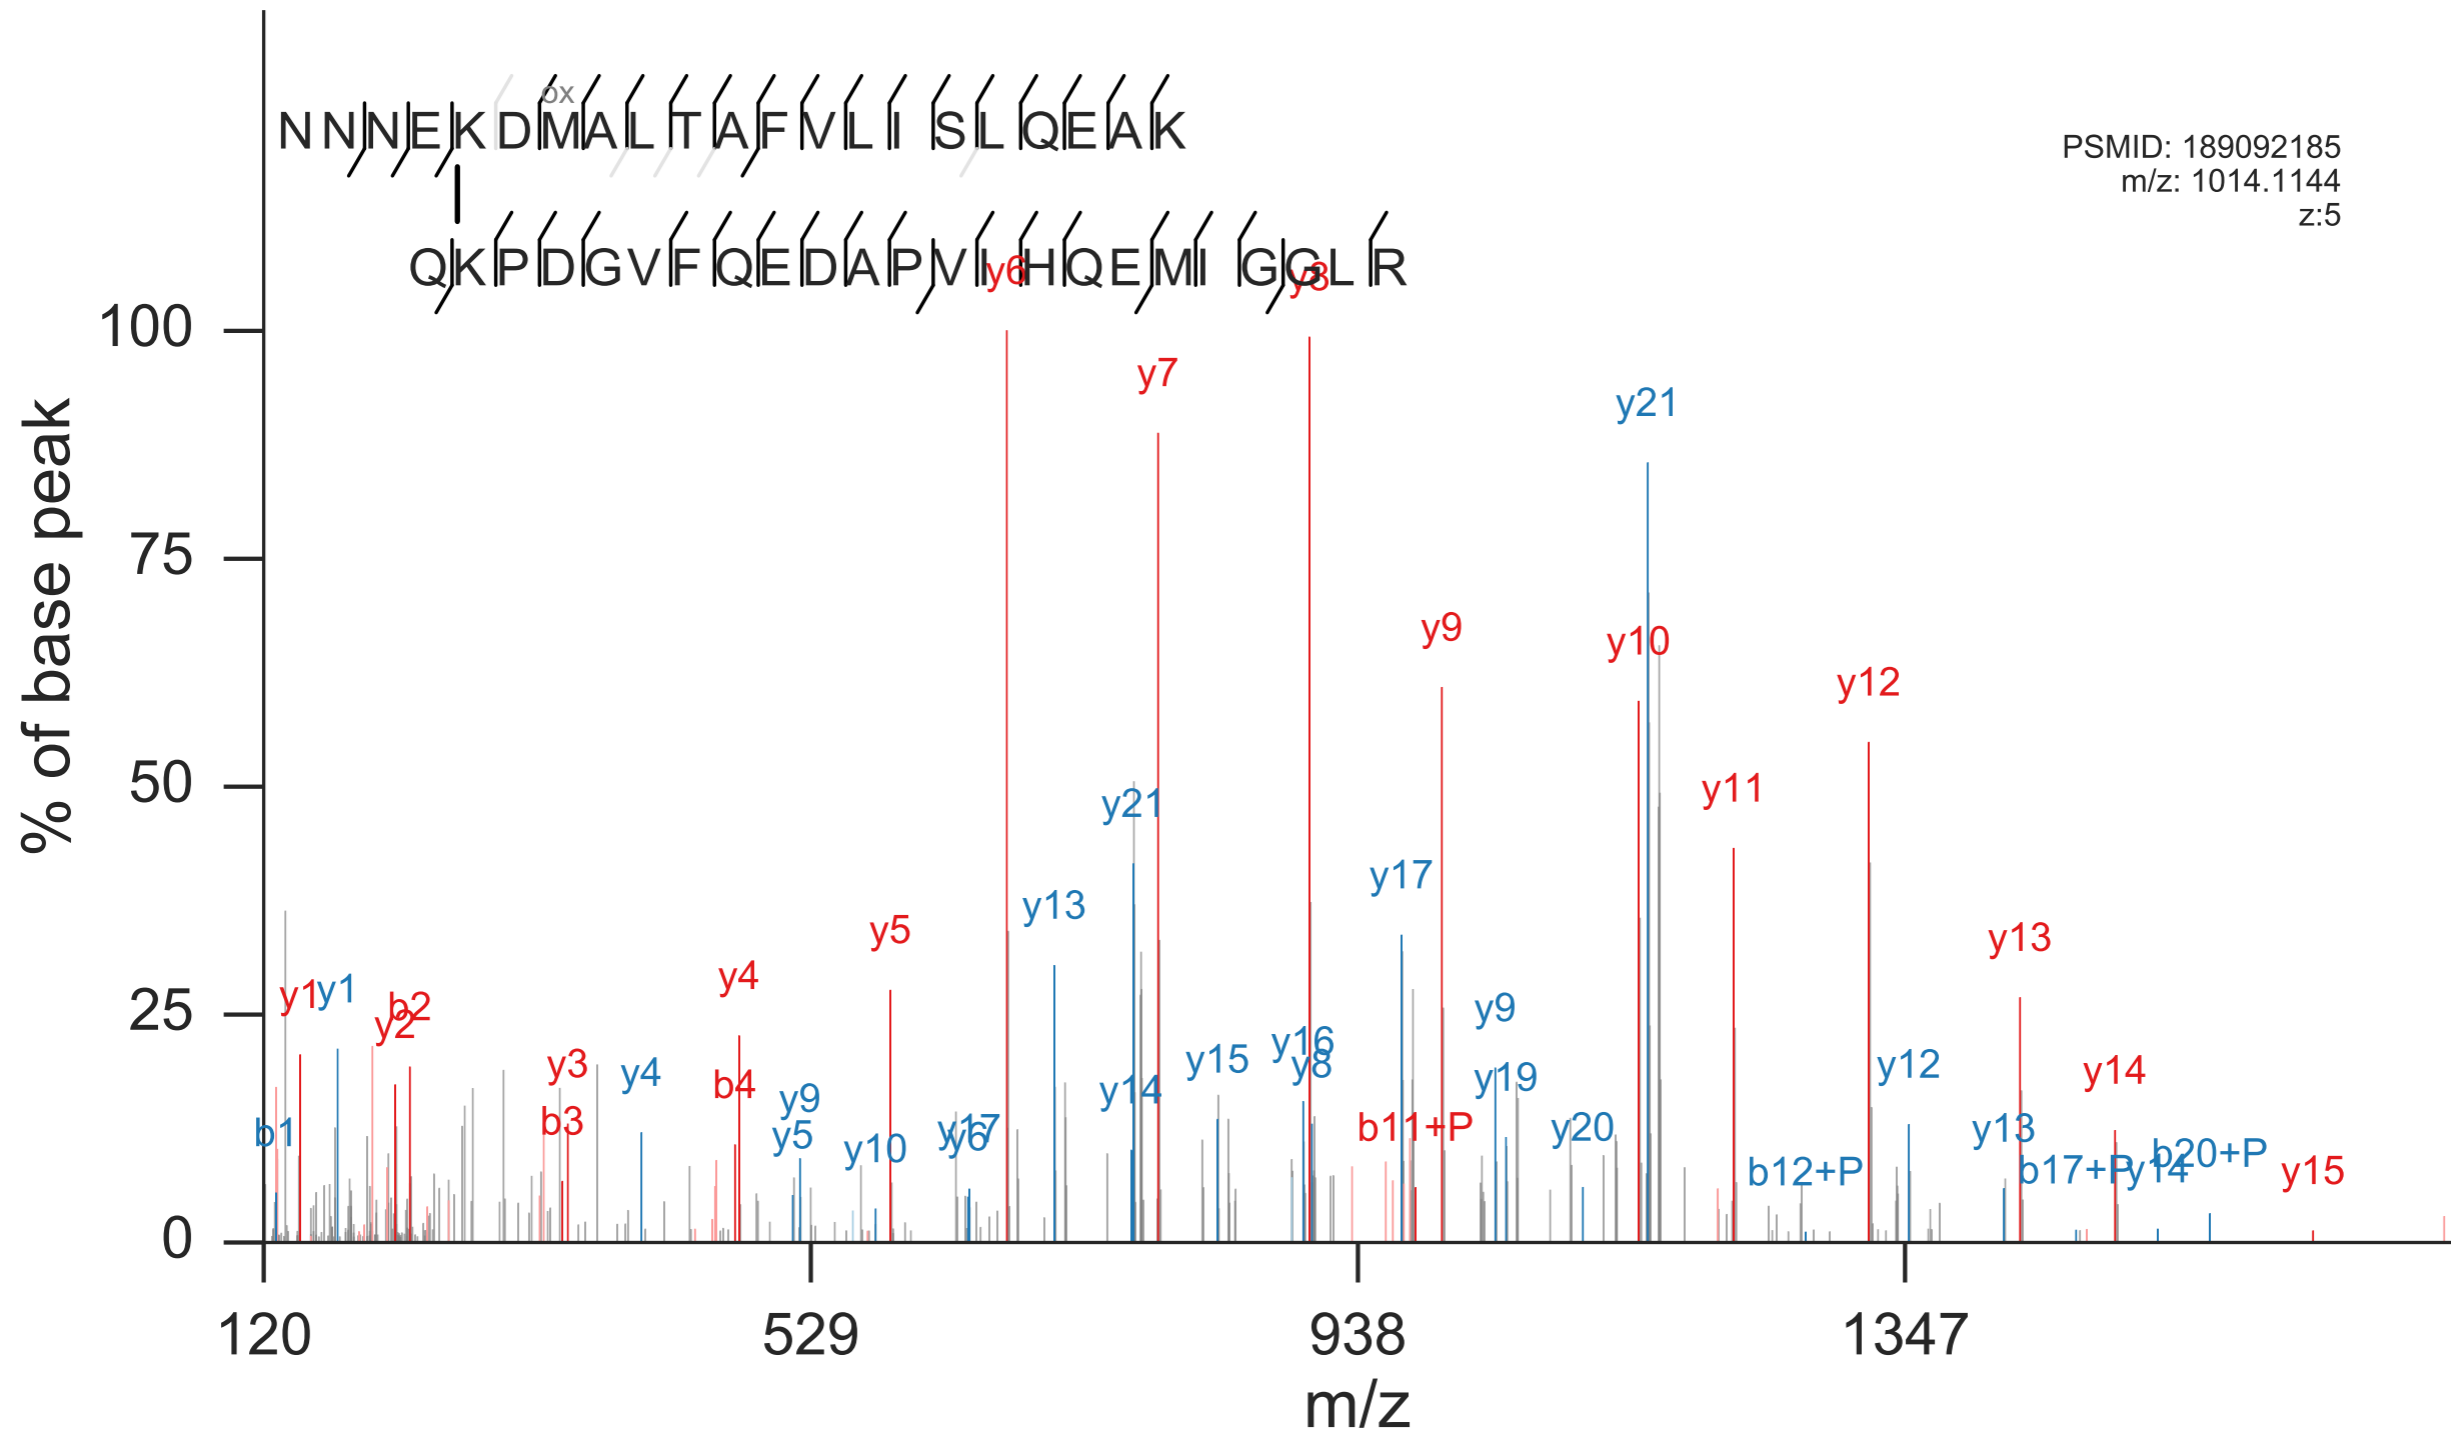

Supplement: Supplementary file [file 056457-1.pdf]
